# Supplementary material for: Photocatalytic decarboxylative amidosulfonation enables direct transformation of carboxylic acids to sulfonamides
Source: Royal Society of Chemistry journal article supplement (doi:10.1039/d1sc01389k), 2021-01-01
Supplement: d1sc01389k1.pdf [file d1sc01389k1.pdf]

## Supporting Information

# Photocatalytic Decarboxylative Amidosulfonation Enables Direct Transformation of Carboxylic Acids to Sulfonamides

Vu T. Nguyen,<sup>+</sup> Graham C. Haug,<sup>+</sup> Viet D. Nguyen, Ngan H. T. Vuong, Hadi D. Arman,  
and Oleg V. Larionov<sup>\*</sup>

Department of Chemistry, The University of Texas at San Antonio, San Antonio, Texas  
78249, United States  
oleg.larionov@utsa.edu

## Contents

|                                                         |      |
|---------------------------------------------------------|------|
| Materials and experimental details .....                | S2   |
| General procedures .....                                | S3   |
| Additional experimental and computational studies ..... | S5   |
| Figure S1 .....                                         | S8   |
| Figures S2-S3 .....                                     | S9   |
| Figures S4-S7 .....                                     | S9   |
| Acridine synthesis .....                                | S13  |
| Sulfonamide products .....                              | S14  |
| Sulfonyl azides .....                                   | S80  |
| Computational data .....                                | S102 |
| X-ray crystallographic data .....                       | S172 |
| NMR spectroscopic data .....                            | S190 |
| References .....                                        | S368 |

## Materials and experimental details

**Materials:** Acridines **A1**, **A2**,<sup>1</sup> as well as DABSO,<sup>2</sup> compounds 5-oxo-5-((3-(4,4,5,5-tetramethyl-1,3,2-dioxaborolan-2-yl)phenyl)amino)pentanoic acid (**S8**),<sup>3</sup> 5-(5-

<sup>+</sup> V.T.N. and G.C.H. contributed equally

methylthiophen-2-yl)-5-oxopentanoic acid (**S9**),<sup>4</sup> 9,10,16-triacetoxylhexadecanoic acid (**S10**),<sup>5</sup> 3,13-di-*O*-acetylgibberellic acid (**S11**),<sup>6</sup> 3 $\alpha$ ,7 $\alpha$ -diacetoxyl-5 $\beta$ -cholanil acid (**S12**),<sup>7</sup> 5-oxo-5-(((3a*S*,5a*R*,8a*R*,8b*S*)-2,2,7,7-tetramethyltetrahydro-3a*H*-bis([1,3]dioxolo)[4,5-*b*:4',5'-d]pyran-3a-yl)methoxy)pentanoic acid (**S13**),<sup>8</sup> and cholic acid 3,7,12-triacetate (**S14**)<sup>7</sup> were prepared as previously described. All other chemicals were used as commercially available.

**Experimental equipment:** Reactions were set up by purging vigorously stirred reaction mixtures with argon for 3 min prior to irradiation, or in a glovebox. Borosilicate glass test-tubes (9- and 10-mL capacity) fitted with GL14 and GL18 screw-caps were used, and the sealed reaction test-tubes were placed in a test-tube rack on a magnetic stirplate that was flanked by two 400 nm 36W LED lights. The temperature in the test-tube rack was 35 °C. Eight parallel reactions arranged in two rows of four tubes were typically carried out in one test-tube rack.

Glovebox work was carried out in a nitrogen-filled LC Technology Solutions LCPW-220 glovebox.

**Purification:** Column chromatography was performed using CombiFlash Rf-200 (Teledyne-Isco) automated flash chromatography system, as well as manually. Thin layer chromatography was carried out on silica gel-coated glass plates (Merck Kieselgel 60 F254). Plates were visualized under ultraviolet light (254 nm) and using a potassium permanganate stain.

**Characterization:** <sup>1</sup>H, <sup>13</sup>C, <sup>11</sup>B, and <sup>19</sup>F NMR spectra were recorded at 500 MHz (<sup>1</sup>H), 125 MHz (<sup>13</sup>C), 202 MHz (<sup>31</sup>P), 470 MHz (<sup>19</sup>F), and 160 MHz (<sup>11</sup>B) on Bruker AVANCE III 500 instruments in CDCl<sub>3</sub> or other specified deuterated solvents with and without tetramethylsilane (TMS) as an internal standard at 25 °C, unless specified otherwise. Chemical shifts ( $\delta$ ) are reported in parts per million (ppm) from tetramethylsilane (<sup>1</sup>H and <sup>13</sup>C), BF<sub>3</sub>·OEt<sub>2</sub> (<sup>11</sup>B), and CFCl<sub>3</sub> (<sup>19</sup>F). Coupling constants (*J*) are in Hz. Proton

multiplicity is assigned using the following abbreviations: singlet (s), doublet (d), triplet (t), quartet (q), quintet (quint.), septet (sept.), multiplet (m), broad (br).

Infrared measurements were carried out neat on a Bruker Vector 22 FT-IR spectrometer fitted with a Specac diamond attenuated total reflectance (ATR) module. EPR Spectra were collected on a Bruker EMX X-band EPR spectrometer.

## General Procedures

### General procedure for the visible light-induced, dual catalytic decarboxylative amidosulfonation with *O*-benzoylhydroxylamines (GP1)

To a 10 mL test-tube, carboxylic acid (0.3 mmol), DABSO (79 mg, 0.33 mmol, 1.1 equiv.), *O*-benzoylhydroxylamine (0.6 mmol, 2 equiv.), acridine catalyst **A1** (9 mg, 0.03 mmol, 10 mol%), copper difluoride (3 mg, 0.03 mmol, 10 mol%), and degassed dichloromethane (6 mL) were added. The test-tube was capped and the reaction mixture was irradiated with LED light ( $\lambda = 400$  nm) while stirring for 12 h. The reaction mixture was then quenched with saturated solution of sodium hydrogen carbonate (3 mL) and extracted with ethyl acetate ( $3 \times 10$  mL). The organic layer was collected, dried over anhydrous sodium sulfate, concentrated under reduced pressure, and the remaining material was purified by flash chromatography on silica gel to give the sulfonamide product.

### General procedure for the visible light-induced, dual catalytic decarboxylative amidosulfonation with anilines (GP2)

To a 10 mL test-tube, aniline (0.3 mmol), carboxylic acid (0.75 mmol, 2.5 equiv.), DABSO (108 mg, 0.45 mmol, 1.5 equiv.), acridine catalyst (0.02–0.03 mmol, 7–10 mol%), *tert*-butyl peroxybenzoate (87 mg, 0.45 mmol, 1.5 equiv.), copper salt (0.03 mmol, 10 mol%), and degassed dichloromethane (3 mL) were added. The test-tube was capped and the reaction mixture was irradiated with LED light ( $\lambda = 400$  nm) while stirring for 12 h. The reaction

mixture was then quenched with saturated solution of sodium hydrogen carbonate (3 mL), extracted with ethyl acetate (3 × 10 mL). The organic layer was collected, dried over anhydrous sodium sulfate, concentrated under reduced pressure, and the remaining material was purified by flash chromatography on silica gel to give the sulfonamide product.

**General procedure for the visible light-induced, dual catalytic decarboxylative azinosulfonation (GP3)**

To a 10 mL test-tube, carboxylic acid (0.3 mmol), DABSO (108 mg, 0.45 mmol, 1.5 equiv.), acridine catalyst **A1** (9 mg, 0.03 mmol, 10 mol%), sodium or potassium azide (0.9 mmol, 3.0 equiv.), *tert*-butyl peroxybenzoate (145 mg, 0.75 mmol, 2.5 equiv.), copper salt (0.03 mmol, 10 mol%) and degassed PhCF<sub>3</sub>/MeCN (3mL, 3 : 1 v/v) were added. The test-tube was capped and the reaction mixture was irradiated with LED light ( $\lambda$  = 400 nm) while stirring at room temperature for 12 h. The reaction mixture was treated with saturated solution of sodium carbonate (3 mL) and extracted with DCM (3 × 10 mL). The organic layer was collected, dried over anhydrous sodium sulfate, concentrated under reduced pressure, and the remaining material was purified by flash chromatography on silica gel to give the sulfonyl azide product.



**Table S1. Catalyst Performance in the Photocatalytic Direct Decarboxylative *N*-Alkyl Aminosulfonation.**<sup>a</sup>

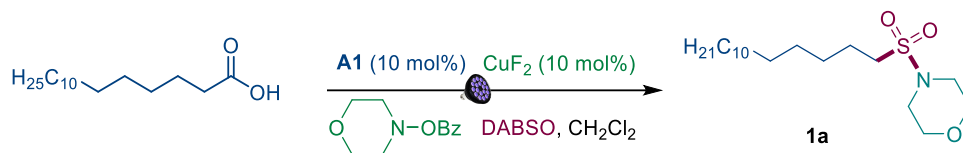

| Entry | Photocatalyst                                                                              | Yield, %       |
|-------|--------------------------------------------------------------------------------------------|----------------|
| 1     | Eosin Y at 450 nm                                                                          | 0              |
| 2     | Eosin Y at 420 nm                                                                          | 0              |
| 3     | Eosin Y at 400 nm                                                                          | 0              |
| 4     | Eosin Y disodium salt at 450 nm                                                            | 0              |
| 5     | 4CzIPN at 450 nm                                                                           | 0              |
| 6     | 4CzIPN at 420 nm                                                                           | 0              |
| 7     | 4CzIPN at 400 nm                                                                           | 0              |
| 8     | [Acr-Mes] <sup>+</sup> (ClO <sub>4</sub> ) <sup>-</sup> at 400 nm                          | 0              |
| 9     | [Acr-Mes] <sup>+</sup> (ClO <sub>4</sub> ) <sup>-</sup> at 450 nm                          | 0 <sup>b</sup> |
| 10    | Ir(ppy) <sub>3</sub> at 450 nm                                                             | 0 <sup>b</sup> |
| 11    | Ir(ppy) <sub>2</sub> (pq) at 450 nm                                                        | 0 <sup>b</sup> |
| 12    | (Ir[dF(CF <sub>3</sub> )ppy] <sub>2</sub> (dtbpy))PF <sub>6</sub> at 450 nm                | 0 <sup>b</sup> |
| 13    | Ru(bpm) <sub>2</sub> Cl <sub>2</sub> at 450 nm                                             | 0 <sup>b</sup> |
| 14    | Ru( <i>p</i> -CF <sub>3</sub> -bpy) <sub>3</sub> (BF <sub>4</sub> ) <sub>2</sub> at 450 nm | 0 <sup>b</sup> |
| 15    | TiO <sub>2</sub> , anatase                                                                 | 0 <sup>c</sup> |

S5

**Table S2. Reaction Conditions for the Photocatalytic Direct Decarboxylative N-Alkyl Aminosulfonation <sup>a</sup>**

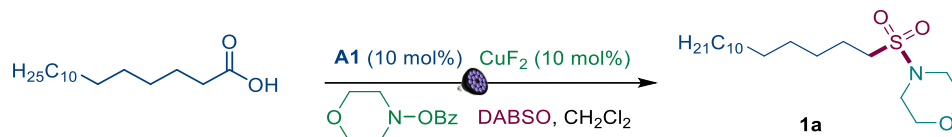

| Entry | Variations from standard conditions                 | Yield, %              |
|-------|-----------------------------------------------------|-----------------------|
| 1     | none                                                | 92 (89 <sup>b</sup> ) |
| 2     | $\text{Cu}(\text{OAc})_2$ instead of $\text{CuF}_2$ | 88                    |
| 3     | $\text{CuOAc}$ instead of $\text{CuF}_2$            | 87                    |
| 4     | $\text{CuCl}$ instead of $\text{CuF}_2$             | 82                    |
| 5     | MeCN instead of $\text{CH}_2\text{Cl}_2$            | 46                    |
| 6     | $\text{PhCF}_3$ instead of $\text{CH}_2\text{Cl}_2$ | 64                    |
| 7     | EtOAc instead of $\text{CH}_2\text{Cl}_2$           | 58                    |

<sup>a</sup> Reaction conditions: carboxylic acid (0.3 mmol), DABSO (0.33 mmol), DABSO (0.33 mmol), acridine **A1** (10 mol%),  $\text{CuF}_2$  (10 mol%), O-benzoylhydroxylamine (0.6 mmol),  $\text{CH}_2\text{Cl}_2$  (6 mL), LED light (400 nm), 12 h. Yield was determined by  $^1\text{H}$  NMR spectroscopy with 1,4-dimethoxybenzene as an internal standard. <sup>b</sup> Isolated yield.

**Table S3. Reaction Conditions for the Photocatalytic Direct Decarboxylative Aminosulfonation with Anilines <sup>a</sup>**

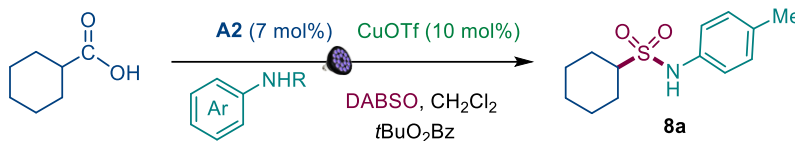

| Entry | Variations from standard conditions                                                                   | Yield, %             |
|-------|-------------------------------------------------------------------------------------------------------|----------------------|
| 1     | none                                                                                                  | 81(79 <sup>b</sup> ) |
| 2     | $\text{CuOTf}_2 \cdot \frac{1}{2}\text{PhH}$ instead of $\text{CuOTf} \cdot \frac{1}{2}\text{PhCH}_3$ | 76                   |
| 3     | $\text{Cu}(\text{acac})_2$ instead of $\text{CuOTf} \cdot \frac{1}{2}\text{PhCH}_3$                   | 51                   |
| 4     | $\text{PhCF}_3$ instead of $\text{CH}_2\text{Cl}_2$                                                   | 48                   |
| 5     | EtOAc instead of $\text{CH}_2\text{Cl}_2$                                                             | 25                   |
| 6     | DTBP instead of $t\text{BuO}_2\text{Bz}$                                                              | 0                    |
| 7     | TBHP (70% w/w in water) instead of $t\text{BuO}_2\text{Bz}$                                           | 0                    |
| 8     | $\text{Bz}_2\text{O}_2$ instead of $t\text{BuO}_2\text{Bz}$                                           | 18                   |
| 9     | DCP instead of $t\text{BuO}_2\text{Bz}$                                                               | 0                    |

<sup>a</sup> Reaction conditions: aniline (0.3 mmol), carboxylic acid (0.75 mmol), DABSO (0.45 mmol), acridine **A2** (7 mol%),  $\text{CuOTf} \cdot \frac{1}{2}\text{PhCH}_3$  (10 mol%),  $t\text{BuO}_2\text{Bz}$  (0.45 mmol),  $\text{CH}_2\text{Cl}_2$  (3 mL), LED light

(400 nm), 12 h. Yield was determined by  $^1\text{H}$  NMR spectroscopy with 1,4-dimethoxybenzene as an internal standard. <sup>b</sup> Isolated yield. DTBP = Di-*tert*-butyl peroxide, TBHP = *tert*-Butyl hydroperoxide, DCP = dicumyl peroxide.

**Table S4. Reaction Conditions for the Photocatalytic Direct Decarboxylative Azinosulfonation<sup>a</sup>**

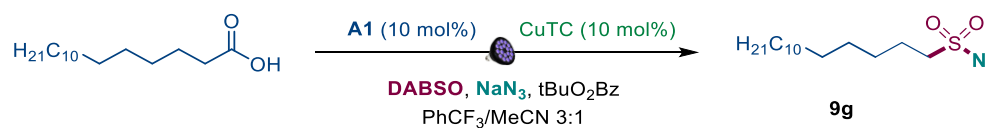

| Entry | Variations from standard conditions                                                   | Yield, %              |
|-------|---------------------------------------------------------------------------------------|-----------------------|
| 1     | none                                                                                  | 78 (75 <sup>b</sup> ) |
| 2     | Cu(hfac) <sub>2</sub> instead of CuTC                                                 | 52                    |
| 3     | CuOAc instead of CuTC                                                                 | 70                    |
| 4     | DTBP instead of <i>t</i> BuO <sub>2</sub> Bz                                          | 0                     |
| 5     | Na <sub>2</sub> S <sub>2</sub> O <sub>8</sub> instead of <i>t</i> BuO <sub>2</sub> Bz | 40                    |
| 6     | TMSN <sub>3</sub> instead of NaN <sub>3</sub>                                         | 44                    |
| 7     | PhCF <sub>3</sub> instead of PhCF <sub>3</sub> /MeCN                                  | 54                    |
| 7     | EtOAc instead of PhCF <sub>3</sub> /MeCN                                              | 5                     |

<sup>a</sup> Reaction conditions: carboxylic acid (0.3 mmol), CuTC (10 mol%), DABSO (0.45 mmol), acridine **A1** (10 mol%), NaN<sub>3</sub> (0.9 mmol), *t*BuO<sub>2</sub>Bz (0.75 mmol), PhCF<sub>3</sub>/MeCN (3:1 v/v 3 mL), LED light (400 nm), 12 h. Yield was determined by  $^1\text{H}$  NMR spectroscopy with 1,4-dimethoxybenzene as an internal standard. <sup>b</sup> Isolated yield. CuTC = copper 2-thiophenecarboxylate; hfac = hexafluoroacetylacetonate. DTBP = di-*tert*-butyl peroxide.

### Cyclic voltammetry studies

Cyclic voltammetry (CV) measurements were performed on a CHI 650D potentiostat using a three-electrode cell with a glassy-carbon working electrode, a Ag|AgCl (1M KCl) reference electrode and a platinum counter electrode. CV was conducted at a scan rate of 100 mV s<sup>-1</sup> for tetrabutylammonium methanesulfinate and tetrabutylammonium methanesulfinate (0.4 mM) and 50 mV s<sup>-1</sup> for copper difluoride (0.2 mM) in anhydrous degassed acetonitrile with tetrabutylammonium hexafluorophosphate (0.2M) as an electrolyte. Inflection-point potentials ( $E_{\text{red}}$ ) were used to characterize irreversible redox

processes, since they were shown to provide the best approximation of standard electrochemical potentials for irreversible redox systems.<sup>[9]</sup> The measured oxidation potentials vs SCE were 0.30 V for tetrabutylammonium methanesulfinate and 1.28 V for tetrabutylammonium acetate. The Cu<sup>II</sup>/Cu<sup>I</sup> reduction potential of copper difluoride was 0.70 V vs SCE.

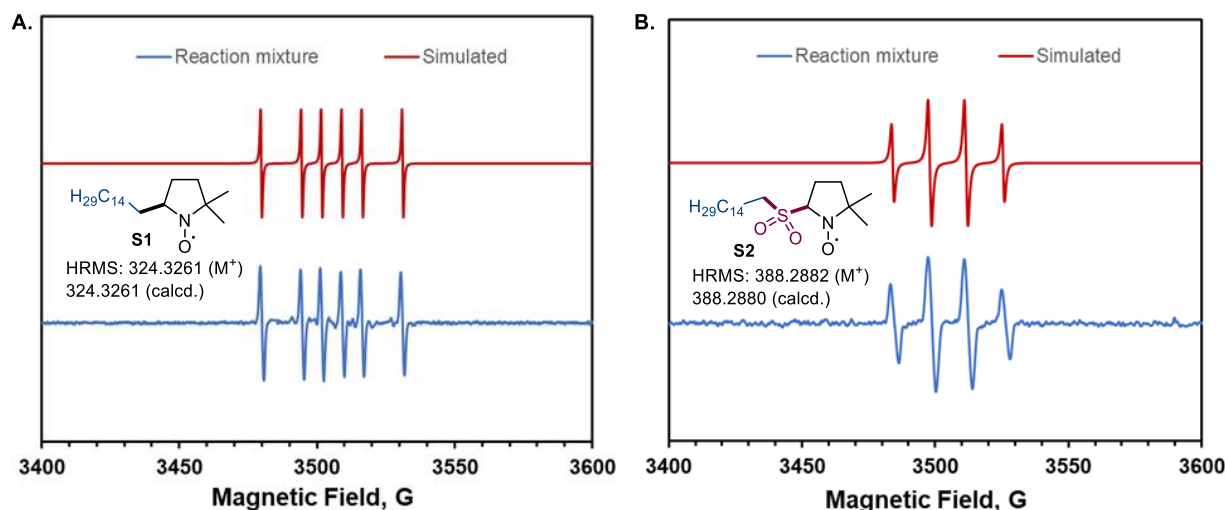

**Figure S1.** Room temperature X-band EPR spectroscopic spin-trapping studies of the direct decarboxylative reaction with palmitic acid as a substrate and DMPO as a spin trap. **A.** Experimental and simulated EPR spectra as well as high resolution mass spectrometry data of the alkyl-DMPO spin adduct **S1** ( $g = 2.0058$ ,  $a_N = 14.7$  G,  $a_H = 22.0$  G) observed in the reaction with DABSO as a sulfur dioxide source. **B.** Experimental and simulated EPR spectra as well as high resolution mass spectrometry data of the alkylsulfonyl-DMPO spin adduct **S2** ( $g = 2.0059$ ,  $a_N = 13.6$  G,  $a_H = 14.2$  G) observed in the reaction with sulfur dioxide. The use of DABSO allowed for successful spin trapping of the alkyl spin adduct due to the lower solubility of DABSO and lower concentration of sulfur dioxide, while the use of sulfur dioxide allowed for the detection of the alkylsulfonyl spin adduct.

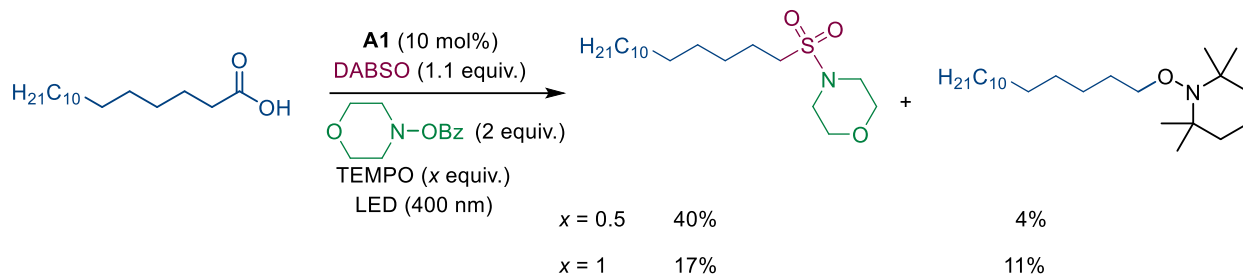

**Figure S2.** Alkyl radical trapping studies with TEMPO.

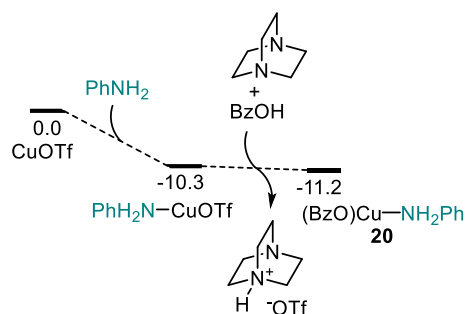

**Figure S3.** A computed energy profile for the formation of copper-ligated aniline intermediate **20**,  $\Delta G$ , kcal/mol. Benzoate was selected as a spectator ligand because it is formed as a by-product of the reduction of  $t\text{BuO}_2\text{Bz}$  and a similar reactivity is expected with aliphatic carboxylates.

### Investigation of the reaction pathways proceeding via O-bound Cu sulfinate intermediates

In addition to the described pathways that proceed via S-bound Cu sulfinate complexes, the energy profiles of the pathways with the O-bound Cu sulfinate intermediates were studied (Figures S4-S6). The O-benzoylhydroxylamine-mediated aminosulfonation proceeds over a 1.9 kcal/mol lower barrier with the O-bound sulfinate intermediates than with the S-bound Cu sulfinate intermediates, retaining the kinetic preference of the stepwise mechanism. In contrast, the pathways proceeding via S-bound Cu sulfinate intermediates are substantially more favored for the aniline aminosulfonation and the azinosulfonation reactions.

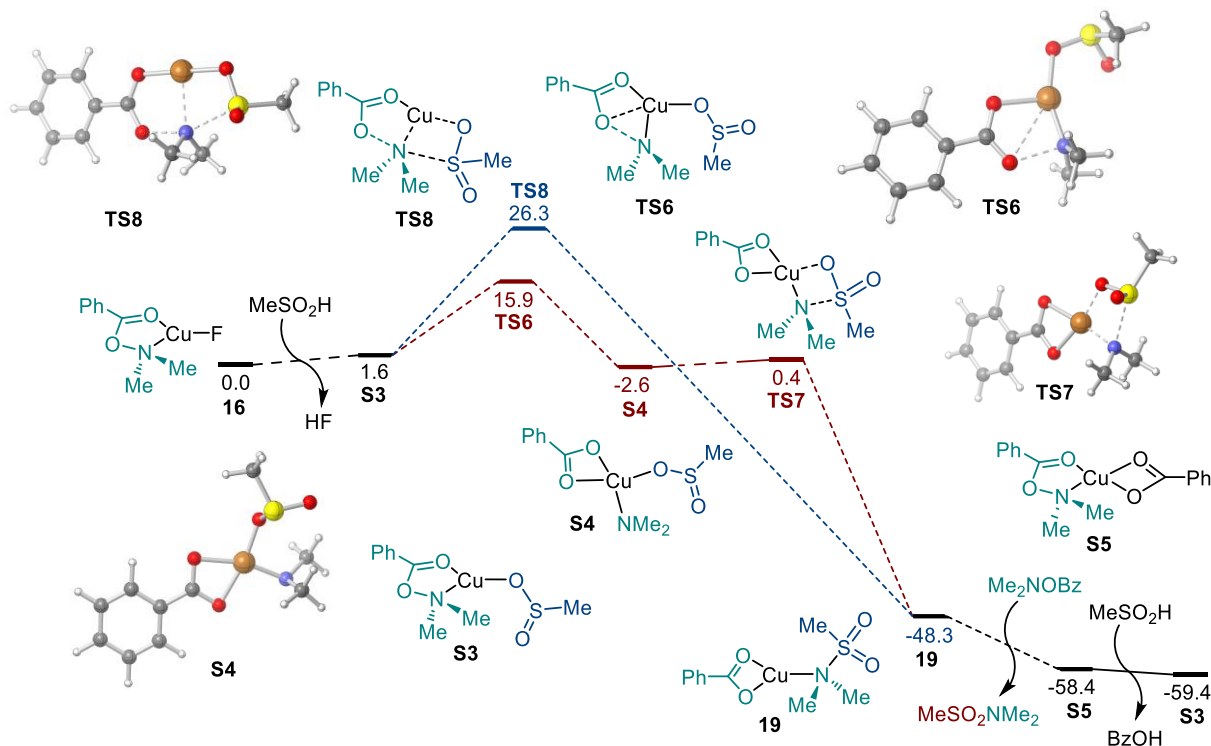

**Figure S4.** A computed energy profile for the radical copper-catalyzed *N*-alkyl aminosulfonation proceeding via oxygen-bound copper sulfinate intermediates **S3** and **S4**,  $\Delta G$ , kcal/mol.

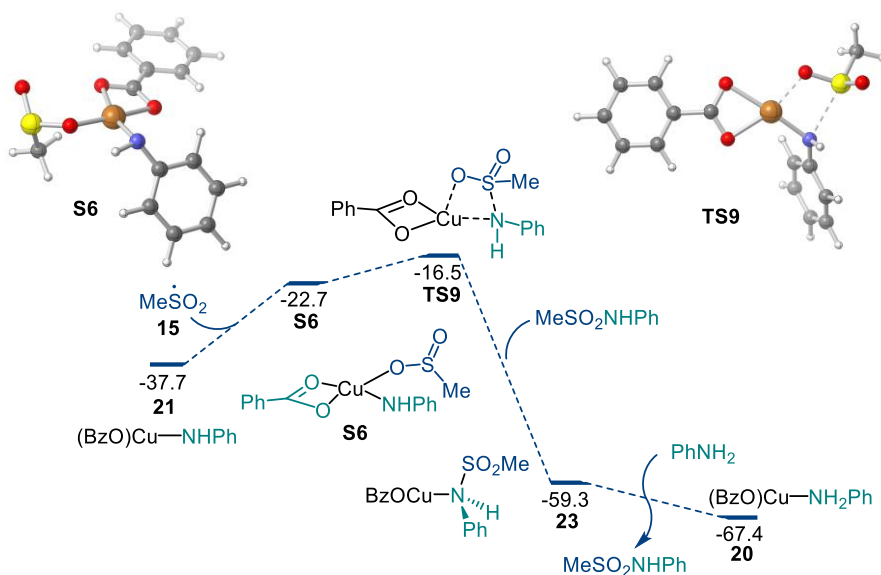

**Figure S5.** A computed energy profile for the radical copper-catalyzed *N*-aryl aminosulfonation proceeding via oxygen-bound copper sulfinate intermediate **S6**,  $\Delta G$ , kcal/mol.

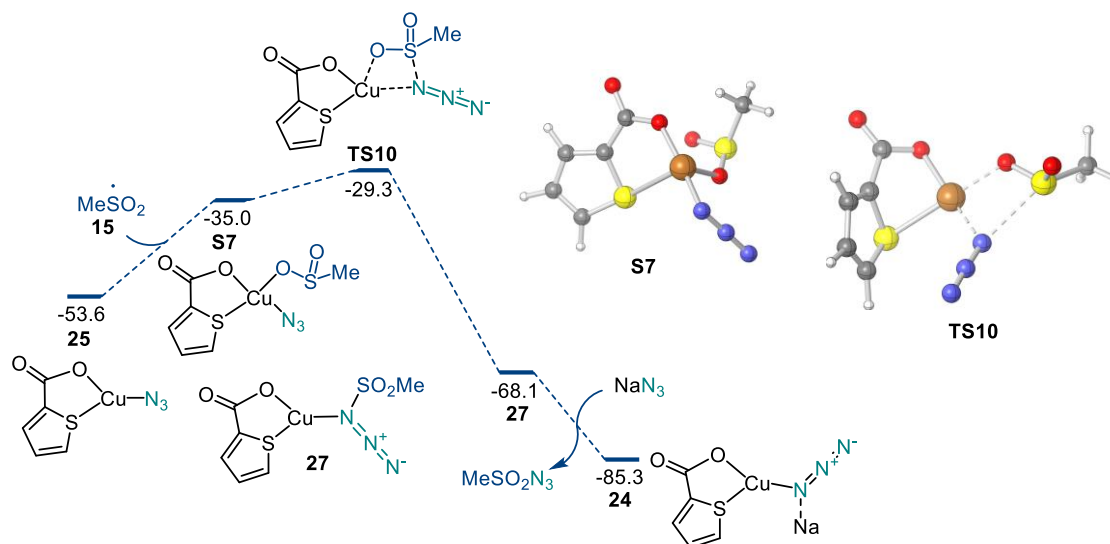

**Figure S6.** A computed energy profile for the radical copper-catalyzed azinosulfonation proceeding via oxygen-bound copper sulfinate intermediate **S7**,  $\Delta G$ , kcal/mol.

### Investigation of alternative mechanistic pathways for the amidosulfonation with N-nucleophiles

An alternative mechanism that involves the initial N-nucleophile addition to sulfonyl radical **11** was also investigated computationally with aniline as a typical nucleophile (Figure S7). The addition of aniline to sulfonyl radical **11** was found to be substantially exergonic by 8.6 kcal/mol. We also studied the pathway that involves the addition of the deprotonated aniline to sulfonyl radical **11**. Because of the absence of a strong base under the reaction conditions, the deprotonation was modeled with aniline, and was found to be prohibitively endergonic ( $\Delta G = 55.6$  kcal/mol). Furthermore, the addition of the aniline anion to sulfonyl radical **11** was also significantly thermodynamically unfavorable by 14.3 kcal/mol. Given that the pathway involves subsequent biomolecular oxidation of the transient addition intermediate, in contrast to the low-barrier unimolecular reductive elimination steps in the pathway presented in Figure 4, and the high endergonicity of the addition steps, the calculations suggest that the pathway involving the N-nucleophile addition to sulfonyl radicals is not operative under the present reaction conditions.

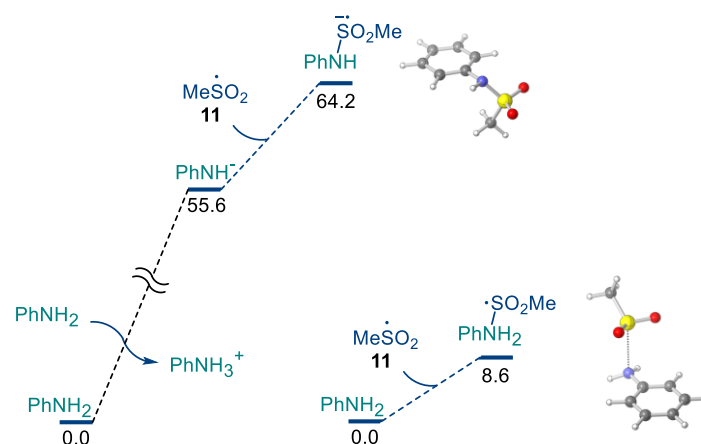

**Figure S7.** Computed energy profiles for the addition of aniline and the deprotonated aniline to sulfonyl radical **11**,  $\Delta G$ , kcal/mol.



## Acridine synthesis

### 2,7-Dimethyl-9-(*o*-tolyl)acridine (A3)

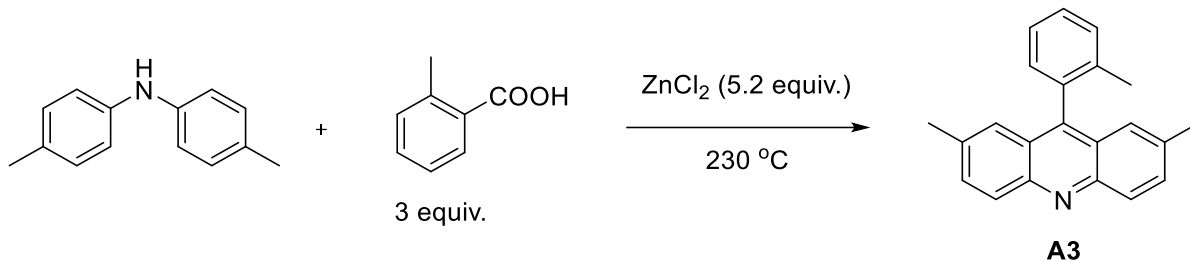

According to the known procedure for synthesis of **A1**,<sup>1</sup> the reaction was carried out with di-*p*-tolylamine (1.42 g, 7.2 mmol), 2-methylbenzoic acid (2.94 g, 21.6 mmol, 3 equiv.), zinc chloride (5.10 g, 37.4 mmol, 5.2 equiv.) in a sand bath at  $230^\circ\text{C}$  for 14 h. After completion, the reaction was quenched with a saturated solution of ammonium hydroxide (50 mL) and then extracted with ethyl acetate (3 x 75 mL). The organic layer was washed with brine, separated, and dried over  $\text{Na}_2\text{SO}_4$ . Removal of the solvent and purification by silica gel chromatography (hexane/ ethyl acetate 9 : 1 v/v) afforded acridine **A3** as a yellow solid (1.39 g, 65%).

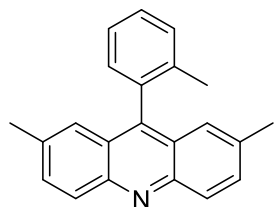

m.p.:  $158\text{--}160^\circ\text{C}$ . –  $^1\text{H}$  NMR (500 MHz,  $\text{CDCl}_3$ ): 8.16 (2 H, d,  $J = 8.8$  Hz), 7.57 (2 H, dd,  $J = 8.9, 1.9$  Hz), 7.53–7.43 (2 H, m), 7.41 (1 H, td,  $J = 7.3, 1.5$  Hz), 7.24–7.19 (3 H, m), 2.43 (6 H, s), 1.88 (3 H, s) ppm. –  $^{13}\text{C}$  NMR (125 MHz,  $\text{CDCl}_3$ ): 147.4, 144.7, 137.1, 136.1, 135.6, 132.6,

130.4, 130.3, 129.5, 128.5, 126.0, 125.4, 124.5, 22.1, 19.9 ppm. – IR: 3025, 2956, 1610, 1560, 1523, 1436, 1370, 1008,  $856\text{ cm}^{-1}$ . – HRMS: calcd for  $\text{C}_{22}\text{H}_{20}\text{N}$ : 298.1590, found 298.1590  $[\text{M}+\text{H}^+]$ .

## Sulfonamides

### 4-(Pentadecylsulfonyl)morpholine (**1a**)

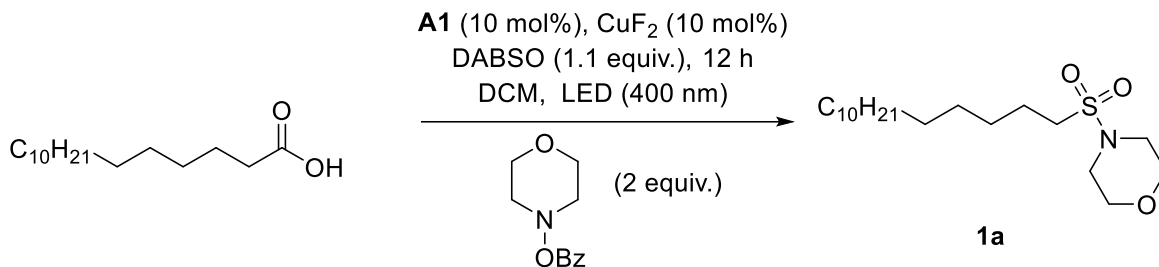

According to **GP1**, the reaction was carried out with palmitic acid (77 mg, 0.3 mmol), DABSO (79 mg, 0.33 mmol, 1.1 equiv.), *N*-(benzoyloxy)morpholine (124 mg, 0.6 mmol, 2 equiv.), acridine catalyst **A1** (9 mg, 0.03 mmol, 10 mol%), copper difluoride (3 mg, 0.03 mmol, 10 mol%), and degassed dichloromethane (6 mL). The test-tube was capped and the reaction mixture was irradiated with LED light ( $\lambda = 400$  nm) while stirring for 12 h. The reaction mixture was then quenched with saturated solution of sodium hydrogen carbonate (3 mL) and extracted with ethyl acetate (3  $\times$  10 mL). The organic layer was collected, dried over anhydrous sodium sulfate, concentrated under reduced pressure, and the remaining material was purified by flash chromatography on silica gel (hexane/ethyl acetate 9 : 1 v/v) to give the sulfone product **1a** (96 mg, 89%) as a colorless solid.

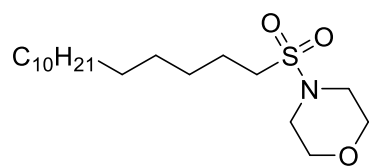
 m.p.: 40–42°C. – <sup>1</sup>H NMR (500 MHz, CDCl<sub>3</sub>): 3.79–3.66 (4 H, m), 3.33–3.19 (4 H, m), 2.95–2.82 (2 H, m), 1.88–1.69 (2 H, m), 1.41 (2 H, p, *J* = 7.2 Hz), 1.25 (22 H, s), 0.87 (3 H, t, *J* = 6.9 Hz) ppm. – <sup>13</sup>C NMR (125 MHz, CDCl<sub>3</sub>): 66.8, 49.0, 46.0, 32.0, 29.8, 29.8, 29.7, 29.6, 29.5, 29.4, 29.4, 29.2, 28.6, 23.1, 22.8, 14.2 ppm. – IR: 3053, 2985, 2310, 1416, 1264, 895 cm<sup>-1</sup>. – HRMS: calcd for C<sub>19</sub>H<sub>40</sub>NO<sub>3</sub>S: 362.2729, found 362.2731 [M+H<sup>+</sup>].

### 4-(Morpholinosulfonyl)-1-phenylbutan-1-one (1b)

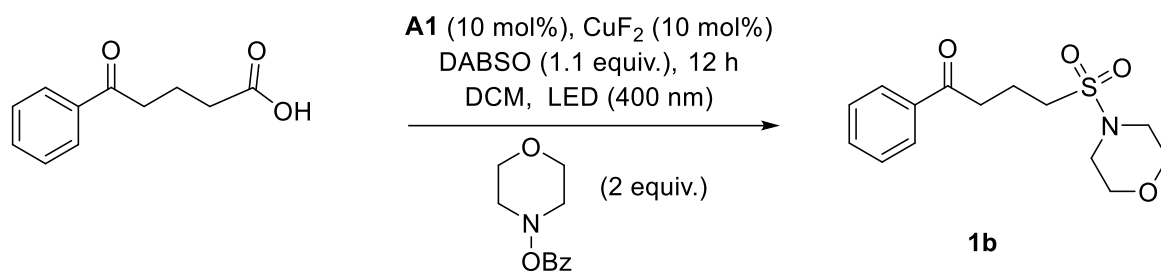

According to **GP1**, the reaction was carried out with 5-oxo-5-phenylpentanoic acid (58 mg, 0.3 mmol), DABSO (79 mg, 0.33 mmol, 1.1 equiv.), *N*-(benzoyloxy)morpholine (124 mg, 0.6 mmol, 2 equiv.), acridine catalyst **A1** (9 mg, 0.03 mmol, 10 mol%), copper difluoride (3 mg, 0.03 mmol, 10 mol%), and degassed dichloromethane (6 mL). The test-tube was capped and the reaction mixture was irradiated with LED light ( $\lambda = 400$  nm) while stirring for 12 h. The reaction mixture was then quenched with saturated solution of sodium hydrogen carbonate (3 mL) and extracted with ethyl acetate ( $3 \times 10$  mL). The organic layer was collected, dried over anhydrous sodium sulfate, concentrated under reduced pressure, and the remaining material was purified by flash chromatography on silica gel (hexane/ ethyl acetate 4 : 1 v/v) to give the sulfone product **1b** (63 mg, 71%) as a colorless solid.

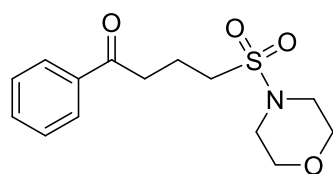

m.p.: 51–53 °C. –  $^1\text{H}$  NMR (300 MHz,  $\text{CDCl}_3$ ): 7.97–7.89 (2 H, m), 7.60–7.52 (1 H, m), 7.49–7.36 (2 H, m), 3.76–3.66 (4 H, m), 3.30–3.14 (6 H, m), 3.11–2.98 (2 H, m), 2.25 (2 H, dt,  $J = 13.7, 6.7$  Hz)

ppm. –  $^{13}\text{C}$  NMR (75 MHz,  $\text{CDCl}_3$ ): 198.6, 136.5, 133.4, 128.7, 128.0, 66.6, 47.9, 45.8, 36.3, 17.7 ppm. – IR: 2974, 2918, 2904, 2857, 1681, 1597, 1448, 1339, 1259, 1149, 1111, 1073, 947, 734, 691  $\text{cm}^{-1}$ . – HRMS: calcd for  $\text{C}_{14}\text{H}_{19}\text{NNaO}_4\text{S}$ : 320.0927, found 320.0928 [ $\text{M}+\text{Na}^+$ ].

### 4-((3,4-Dimethoxyphenethyl)sulfonyl)morpholine (**1c**)

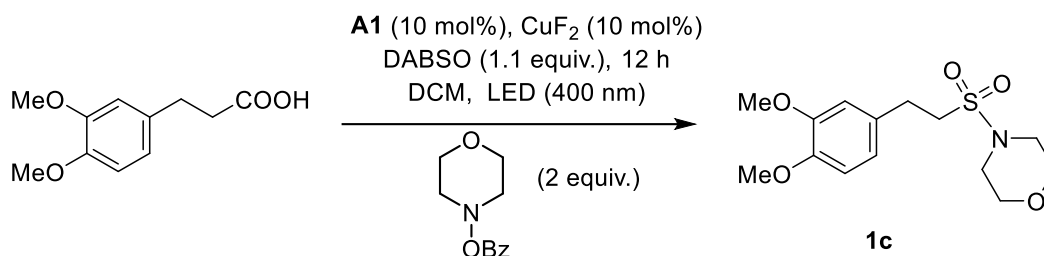

According to **GP1**, the reaction was carried out with 3-(3,4-dimethoxyphenyl)propanoic acid (63 mg, 0.3 mmol), DABSO (79 mg, 0.33 mmol, 1.1 equiv.), *N*-(benzoyloxy)morpholine (124 mg, 0.6 mmol, 2 equiv.), acridine catalyst **A1** (9 mg, 0.03 mmol, 10 mol%), copper difluoride (3 mg, 0.03 mmol, 10 mol%) in degassed dichloromethane (6 mL). The test-tube was capped and the reaction mixture was irradiated with LED light ( $\lambda = 400$  nm) while stirring for 12 h. The reaction mixture was then quenched with saturated solution of sodium hydrogen carbonate (3 mL) and extracted with ethyl acetate ( $3 \times 10$  mL). The organic layer was collected, dried over anhydrous sodium sulfate, concentrated under reduced pressure, and the remaining material was purified by flash chromatography on silica gel (hexane/ethyl acetate 1 : 1 v/v) to give the sulfonamide product **1c** (57 mg, 60%) as a white solid.

m.p.: 71–73°C. – <sup>1</sup>H NMR (500 MHz, CDCl<sub>3</sub>): 6.86–6.68 (3 H, m), 3.86 (6 H, dd, *J* = 9.0, 3.0 Hz), 3.74 (4 H, q, *J* = 6.3, 4.2 Hz), 3.27 (4 H, q, *J* = 7.0, 4.2 Hz), 3.20–3.01 (4 H, m) ppm. – <sup>13</sup>C NMR (125 MHz, CDCl<sub>3</sub>): 149.3, 148.2, 130.5, 120.4, 111.7, 111.6, 66.7, 56.1, 50.6, 45.9, 29.0 ppm. – IR: 3002, 2966, 2922, 2856, 1603, 1589, 1515, 1462, 1443, 1342, 1292, 1135, 1107, 1068, 1024, 938, 850, 791, 740, 704 cm<sup>-1</sup>. – HRMS: calcd for C<sub>14</sub>H<sub>21</sub>NO<sub>5</sub>S: 315.1140, found 315.1138 [*M*<sup>+</sup>].

***N*-(3-(Morpholinosulfonyl)propyl)-3-(4,4,5,5-tetramethyl-1,3,2-dioxaborolan-2-yl)benzamide (1d)**

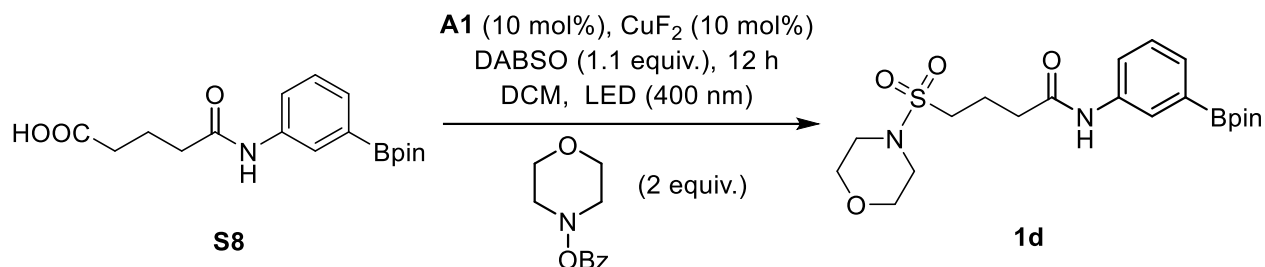

According to **GP1**, the reaction was carried out with acid **S8** (100 mg, 0.3 mmol), DABSO (79 mg, 0.33 mmol, 1.1 equiv.), *N*-(benzoyloxy)morpholine (124 mg, 0.6 mmol, 2 equiv.), acridine catalyst **A1** (9 mg, 0.03 mmol, 10 mol%), copper difluoride (3 mg, 0.03 mmol, 10 mol%) in degassed dichloromethane (6 mL). The test-tube was capped and the reaction mixture was irradiated with LED light ( $\lambda = 400$  nm) while stirring for 12 h. The reaction mixture was then quenched with saturated solution of sodium hydrogen carbonate (3 mL) and extracted with ethyl acetate ( $3 \times 10$  mL). The organic layer was collected, dried over anhydrous sodium sulfate, concentrated under reduced pressure, and the remaining material was purified by flash chromatography on silica gel (hexane/ethyl acetate 7 : 3 v/v) to give the sulfonamide product **1d** (95 mg, 72%) as a white solid.

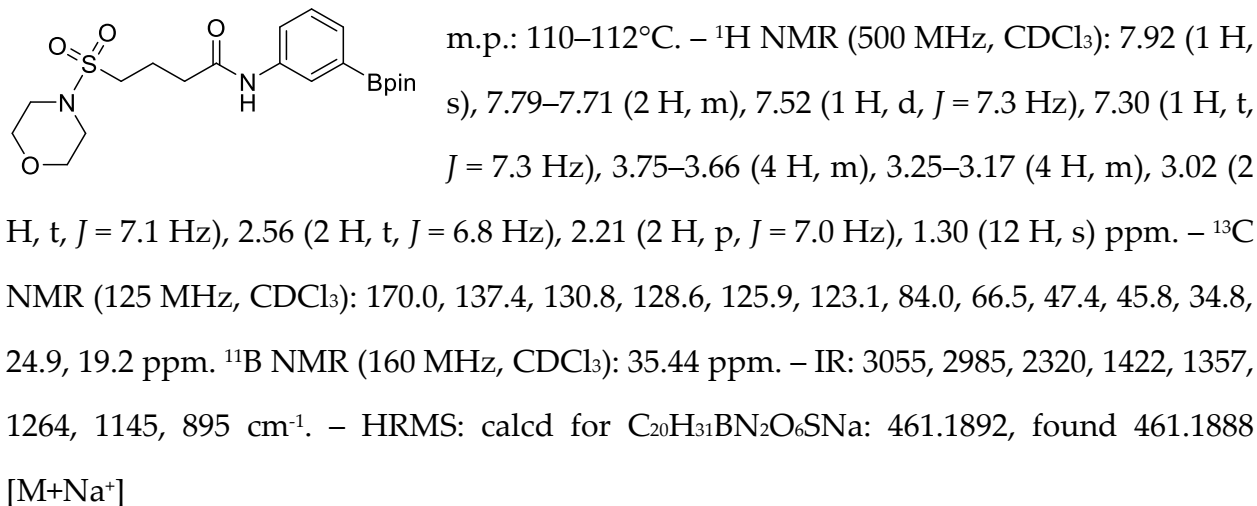

### 3-(Morpholinosulfonyl)-1-phenylpropan-1-one (1e)

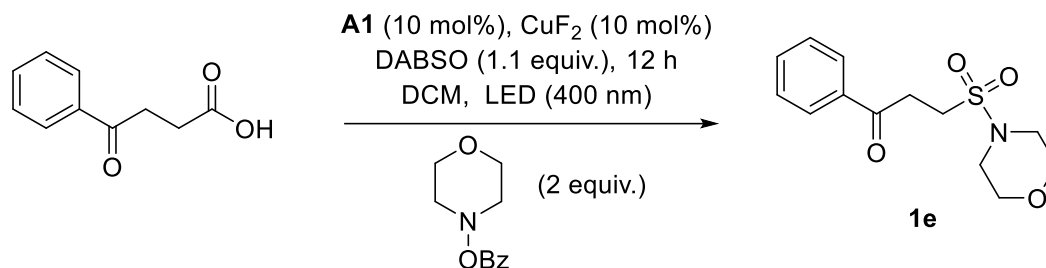

According to **GP1**, the reaction was carried out with 4-oxo-4-phenylbutanoic acid (53 mg, 0.3 mmol), DABSO (79 mg, 0.33 mmol, 1.1 equiv.), *N*-(benzoyloxy)morpholine (124 mg, 0.6 mmol, 2 equiv.), acridine catalyst **A1** (9 mg, 0.03 mmol, 10 mol%), copper difluoride (3 mg, 0.03 mmol, 10 mol%), and degassed dichloromethane (6 mL). The test-tube was capped and the reaction mixture was irradiated with LED light ( $\lambda = 400$  nm) while stirring for 12 h. The reaction mixture was then quenched with saturated solution of sodium hydrogen carbonate (3 mL) and extracted with ethyl acetate ( $3 \times 10$  mL). The organic layer was collected, dried over anhydrous sodium sulfate, concentrated under reduced pressure, and the remaining material was purified by flash chromatography on silica gel (hexane/ ethyl acetate 4 : 1 v/v) to give the sulfone product **1e** (49 mg, 58%) as a colorless solid.

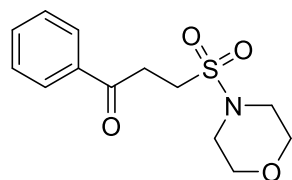

m.p.: 128–130 °C. –  $^1\text{H}$  NMR (500 MHz,  $\text{CDCl}_3$ ): 8.00–7.94 (2 H, m), 7.64–7.56 (1 H, m), 7.49 (2 H, t,  $J = 7.8$  Hz), 3.75–3.69 (4 H, m), 3.51 (2 H, dd,  $J = 8.0, 6.6$  Hz), 3.38 (2 H, dd,  $J = 7.9, 6.5$  Hz), 3.29–3.24 (4 H, m) ppm. –  $^{13}\text{C}$  NMR (125 MHz,  $\text{CDCl}_3$ ): 196.0, 136.0, 134.0, 129.0, 128.2, 66.5, 45.8, 43.4, 32.1 ppm. – IR: 3062, 2956, 2914, 2893, 2856, 1682, 1596, 1580, 1447, 1417, 1359, 1341, 1259, 1147, 1111, 1072, 973, 951, 920, 846, 797, 746, 706, 693  $\text{cm}^{-1}$ . – HRMS: calcd for  $\text{C}_{13}\text{H}_{18}\text{NO}_4\text{S}$ : 284.0951 found 284.0963  $[\text{M}+\text{H}^+]$ .

**1-(5-Methylthiophen-2-yl)-4-(morpholinosulfonyl)butan-1-one (1f)**

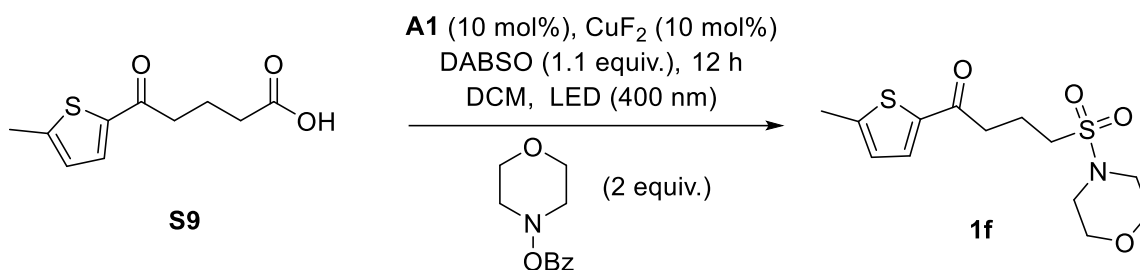

According to **GP1**, the reaction was carried out with acid **S9** (64 mg, 0.3 mmol), DABSO (79 mg, 0.33 mmol, 1.1 equiv.), *N*-(benzoyloxy)morpholine (124 mg, 0.6 mmol, 2 equiv.), acridine catalyst **A1** (9 mg, 0.03 mmol, 10 mol%), copper difluoride (3 mg, 0.03 mmol, 10 mol%), and degassed dichloromethane (6 mL). The test-tube was capped and the reaction mixture was irradiated with LED light ( $\lambda = 400$  nm) while stirring for 12 h. The reaction mixture was then quenched with saturated solution of sodium hydrogen carbonate (3 mL) and extracted with ethyl acetate ( $3 \times 10$  mL). The organic layer was collected, dried over anhydrous sodium sulfate, concentrated under reduced pressure, and the remaining material was purified by flash chromatography on silica gel (hexane/ ethyl acetate 3 : 2 v/v) to give the sulfone product **1f** (75 mg, 79%) as a yellow solid.

Chemical structure of **1f** is shown.   
 m.p.: 80–83 °C. –  $^1\text{H}$  NMR (500 MHz,  $\text{CDCl}_3$ ): 7.52 (1 H, d,  $J = 3.7$  Hz), 6.77 (1 H, d,  $J = 3.7$  Hz), 3.71 (4 H, t,  $J = 4.7$  Hz), 3.27–3.18 (4 H, m), 3.04 (4 H, dt,  $J = 14.7, 7.1$  Hz), 2.50 (3 H, s), 2.21 (2 H, quint.,  $J = 7.0, 6.5$  Hz) ppm. –  $^{13}\text{C}$  NMR (125 MHz,  $\text{CDCl}_3$ ): 191.2, 150.1, 141.5, 132.8, 127.0, 66.6, 47.9, 45.8, 36.3, 18.0, 16.1 ppm. – IR: 2974, 2925, 2901, 2857, 2253, 1651, 1452, 1339, 1324, 1259, 1151, 1112, 1072, 949, 915, 807, 729  $\text{cm}^{-1}$ . – HRMS: calcd for  $\text{C}_{13}\text{H}_{19}\text{NNaO}_4\text{S}_2$ : 340.0648, found 340.0650  $[\text{M}+\text{Na}^+]$ .

### 1,7-Bis(morpholinosulfonyl)heptane (**1g**)

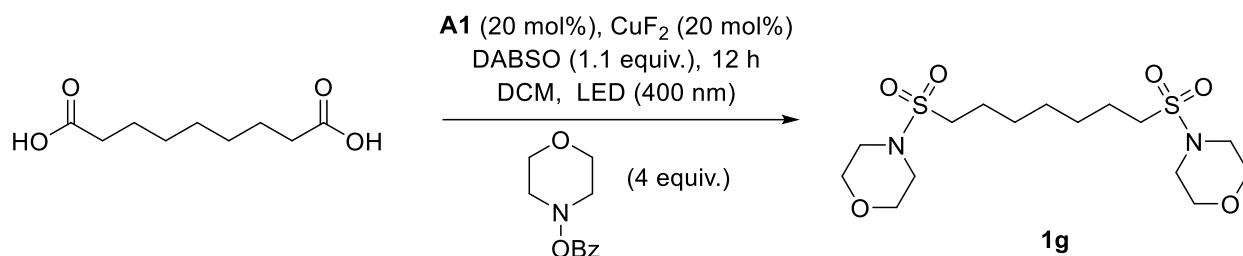

According to **GP1**, the reaction was carried out with azelaic acid (28 mg, 0.15 mmol), DABSO (79 mg, 0.33 mmol, 1.1 equiv.), *N*-(benzoyloxy)morpholine (124 mg, 0.6 mmol, 4 equiv.), acridine catalyst **A1** (9 mg, 0.03 mmol, 20 mol%), copper difluoride (3 mg, 0.03 mmol, 20 mol%), and degassed dichloromethane (6 mL). The test-tube was capped and the reaction mixture was irradiated with LED light ( $\lambda = 400$  nm) while stirring for 12 h. The reaction mixture was then quenched with saturated solution of sodium hydrogen carbonate (3 mL) and extracted with ethyl acetate ( $3 \times 10$  mL). The organic layer was collected, dried over anhydrous sodium sulfate, concentrated under reduced pressure, and the remaining material was purified by flash chromatography on silica gel (hexane/ethyl acetate 1 : 4 v/v) to give the sulfone product **1g** (30 mg, 50%) as a yellow solid.

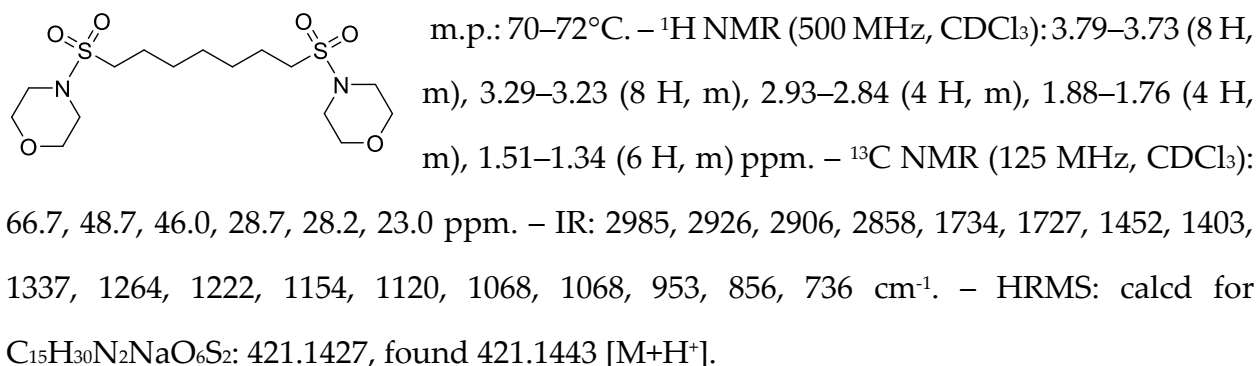



### 4-(Heptan-4-ylsulfonyl)morpholine (**1h**)

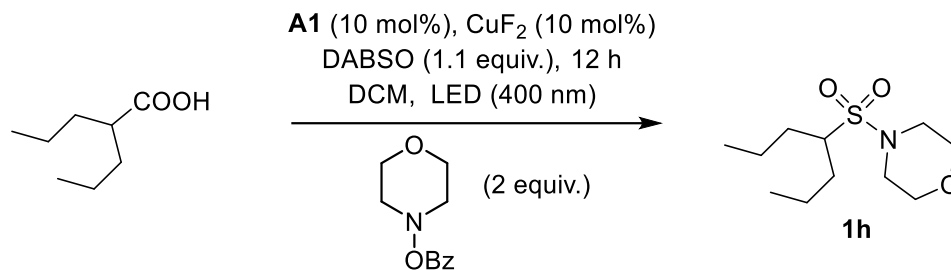

According to **GP1**, the reaction was carried out with 2-propylpentanoic acid (43 mg, 0.3 mmol), DABSO (79 mg, 0.33 mmol, 1.1 equiv.), *N*-(benzyloxy)morpholine (124 mg, 0.6 mmol, 2 equiv.), acridine catalyst **A1** (9 mg, 0.03 mmol, 10 mol%), copper difluoride (3 mg, 0.03 mmol, 10 mol%) in degassed dichloromethane (6 mL). The test-tube was capped and the reaction mixture was irradiated with LED light ( $\lambda = 400$  nm) while stirring for 12 h. The reaction mixture was then quenched with saturated solution of sodium hydrogen carbonate (3 mL) and extracted with ethyl acetate ( $3 \times 10$  mL). The organic layer was collected, dried over anhydrous sodium sulfate, concentrated under reduced pressure, and the remaining material was purified by flash chromatography on silica gel (hexane/ethyl acetate 9 : 1 v/v) to give the sulfonamide product **1h** (61 mg, 82%) as a yellow liquid.

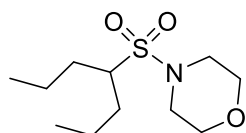

<sup>1</sup>H NMR (500 MHz, CDCl<sub>3</sub>): 3.77–3.68 (4 H, m), 3.39–3.26 (4 H, m), 2.90 (1 H, tt,  $J = 7.2, 4.7$  Hz), 1.80 (2 H, dddd,  $J = 14.1, 10.6, 5.9, 4.8$  Hz), 1.62 (2 H, dddd,  $J = 14.1, 10.4, 7.2, 5.1$  Hz), 1.58–1.36 (4 H, m), 0.94 (6 H, t,  $J = 7.3$  Hz) ppm. – <sup>13</sup>C NMR (125 MHz, CDCl<sub>3</sub>): 67.1, 61.8, 46.4, 30.9, 20.1, 14.2 ppm. – IR: 3062, 2935, 2873, 2864, 1462, 1263, 1138, 1114, 1066 cm<sup>-1</sup>. – HRMS: calcd for C<sub>11</sub>H<sub>23</sub>NO<sub>3</sub>SNa: 272.1291, found 272.1291 [M+Na<sup>+</sup>]

4-((2,3-Dihydro-1*H*-inden-2-yl)sulfonyl)morpholine (**1i**)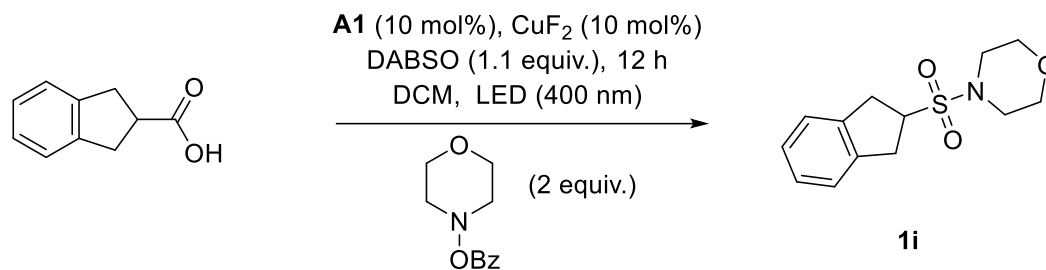

According to **GP1**, the reaction was carried out with 2,3-dihydro-1*H*-indene-2-carboxylic acid (49 mg, 0.3 mmol), DABSO (79 mg, 0.33 mmol, 1.1 equiv.), *N*-(benzoyloxy)morpholine (124 mg, 0.6 mmol, 2 equiv.), acridine catalyst **A1** (9 mg, 0.03 mmol, 10 mol%), copper difluoride (3 mg, 0.03 mmol, 10 mol%), and degassed dichloromethane (6 mL). The test-tube was capped and the reaction mixture was irradiated with LED light ( $\lambda = 400$  nm) while stirring for 12 h. The reaction mixture was then quenched with saturated solution of sodium hydrogen carbonate (3 mL) and extracted with ethyl acetate ( $3 \times 10$  mL). The organic layer was collected, dried over anhydrous sodium sulfate, concentrated under reduced pressure, and the remaining material was purified by flash chromatography on silica gel (hexane/ ethyl acetate 4 : 1 v/v) to give the sulfone product **1i** (50 mg, 62%) as a colorless solid.

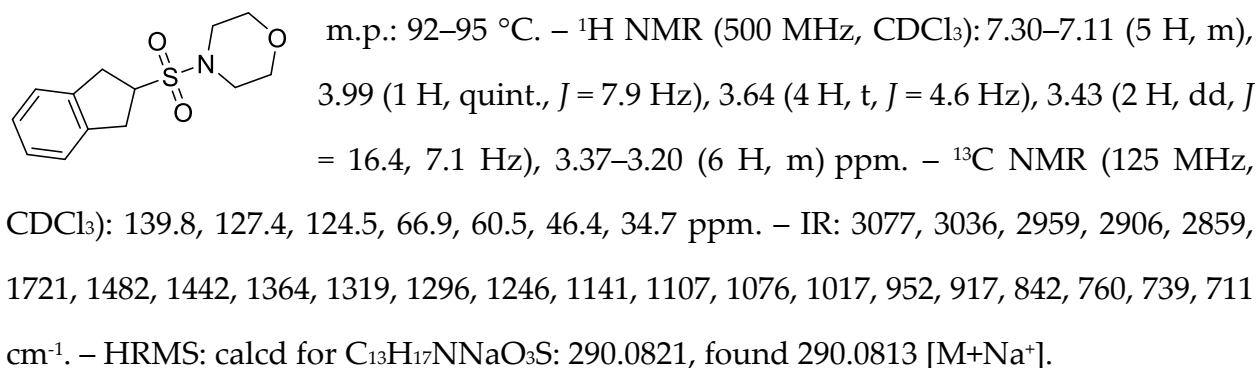

4-((4,4-Difluorocyclohexyl)sulfonyl)morpholine (**1j**)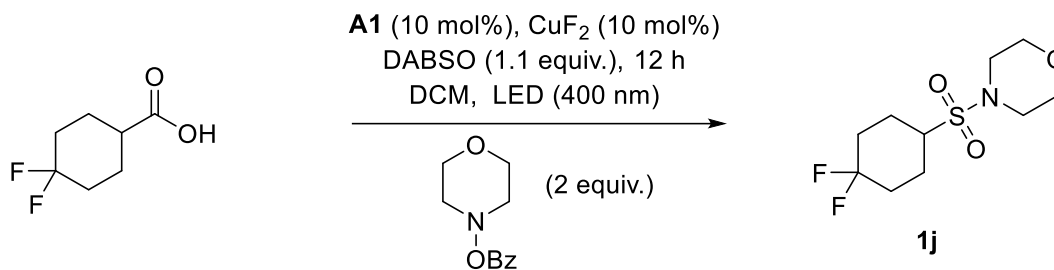

According to **GP1**, the reaction was carried out with 4,4-difluorocyclohexane-1-carboxylic acid (49 mg, 0.3 mmol), DABSO (79 mg, 0.33 mmol, 1.1 equiv.), *N*-(benzyloxy)morpholine (124 mg, 0.6 mmol, 2 equiv.), acridine catalyst **A1** (9 mg, 0.03 mmol, 10 mol%), copper difluoride (3 mg, 0.03 mmol, 10 mol%), and degassed dichloromethane (6 mL). The test-tube was capped and the reaction mixture was irradiated with LED light ( $\lambda = 400$  nm) while stirring for 12 h. The reaction mixture was then quenched with saturated solution of sodium hydrogen carbonate (3 mL) and extracted with ethyl acetate ( $3 \times 10$  mL). The organic layer was collected, dried over anhydrous sodium sulfate, concentrated under reduced pressure, and the remaining material was purified by flash chromatography on silica gel (hexane/ ethyl acetate 4 : 1 v/v) to give the sulfone product **1j** (65 mg, 81%) as a colorless solid.

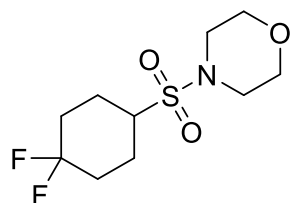

m.p.: 73–75 °C. –  $^1\text{H}$  NMR (500 MHz,  $\text{CDCl}_3$ ): 3.74–3.66 (4 H, m), 3.36–3.30 (4 H, m), 2.97 (1 H, ttd,  $J = 11.5, 3.7, 1.3$  Hz), 2.32–2.10 (4H, m), 1.89 (2 H, qd,  $J = 12.8, 3.6$  Hz), 1.82–1.69 (2 H, m) ppm. –  $^{13}\text{C}$  NMR (125 MHz,  $\text{CDCl}_3$ ): 122.9 (d,  $^1J_{\text{C-F}} = 241.0$  Hz), 67.1, 58.7, 46.5, 32.3 (t,  $^2J_{\text{C-F}} = 25.0$  Hz), 23.3 (d,  $^3J_{\text{C-F}} = 9.3$  Hz) ppm. –  $^{19}\text{F}$  NMR (470 MHz,  $\text{CDCl}_3$ ): –94.38 (d,  $J = 240.2$  Hz), –102.01 (d,  $J = 240.1$  Hz) ppm. – IR: 2969, 2930, 2860, 1455, 1322, 1261, 1148, 1108, 1074, 953, 743, 714  $\text{cm}^{-1}$ . – HRMS: calcd for  $\text{C}_{10}\text{H}_{17}\text{F}_2\text{NO}_3\text{S}$ : 269.0897, found 269.0903  $[\text{M}^+]$ .

***tert*-Butyl 4-(morpholinosulfonyl)piperidine-1-carboxylate (**1k**)**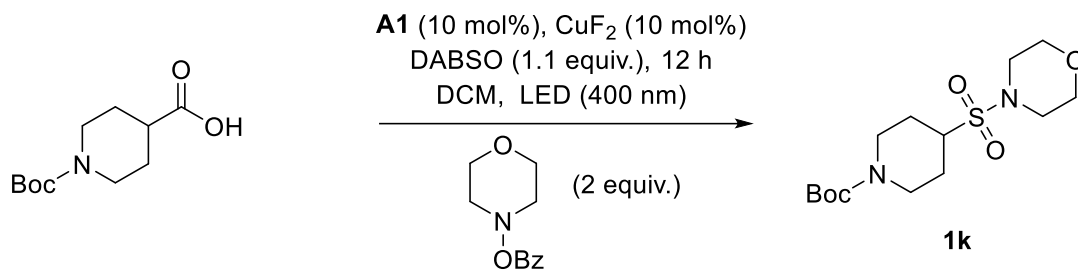

According to **GP1**, the reaction was carried out with 1-(*tert*-butoxycarbonyl)piperidine-4-carboxylic acid (69 mg, 0.3 mmol), DABSO (79 mg, 0.33 mmol, 1.1 equiv.), *N*-(benzyloxy)morpholine (124 mg, 0.6 mmol, 2 equiv.), acridine catalyst **A1** (9 mg, 0.03 mmol, 10 mol%), copper difluoride (3 mg, 0.03 mmol, 10 mol%), and degassed dichloromethane (6 mL). The test-tube was capped and the reaction mixture was irradiated with LED light ( $\lambda = 400$  nm) while stirring for 12 h. The reaction mixture was then quenched with saturated solution of sodium hydrogen carbonate (3 mL) and extracted with ethyl acetate (3  $\times$  10 mL). The organic layer was collected, dried over anhydrous sodium sulfate, concentrated under reduced pressure, and the remaining material was purified by flash chromatography on silica gel (hexane/ ethyl acetate 1 : 1 v/v) to give the sulfone product **1k** (70 mg, 70%) as a colorless solid.

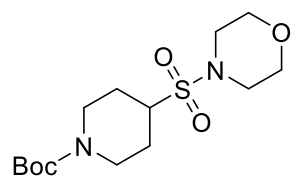
 m.p.: 105–107 °C. – <sup>1</sup>H NMR (500 MHz, CDCl<sub>3</sub>): 4.29–4.11 (2 H, m), 3.72–3.62 (4 H, m), 3.30 (4 H, dd, *J* = 5.6, 3.8 Hz), 3.01 (1 H, tt, *J* = 12.0, 3.7 Hz), 2.75–2.55 (2 H, m), 2.03–1.91 (2 H, m), 1.65 (2 H, qd, *J* = 12.5, 4.6 Hz), 1.41 (9 H, s) ppm. – <sup>13</sup>C NMR (125 MHz, CDCl<sub>3</sub>): 154.4, 80.1, 67.0, 59.4, 46.4, 42.6, 28.4, 26.0 ppm. – IR: 2980, 2959, 2925, 2865, 1676, 1460, 1406, 1364, 1314, 1284, 1142, 1111, 1076, 1006, 982, 948, 874, 779, 720 cm<sup>-1</sup>. – HRMS: calcd for C<sub>14</sub>H<sub>26</sub>N<sub>2</sub>NaO<sub>5</sub>S: 357.1455, found 357.1462 [M+Na<sup>+</sup>].

### 4-((Tetrahydro-2H-pyran-4-yl)sulfonyl)morpholine (**11**)

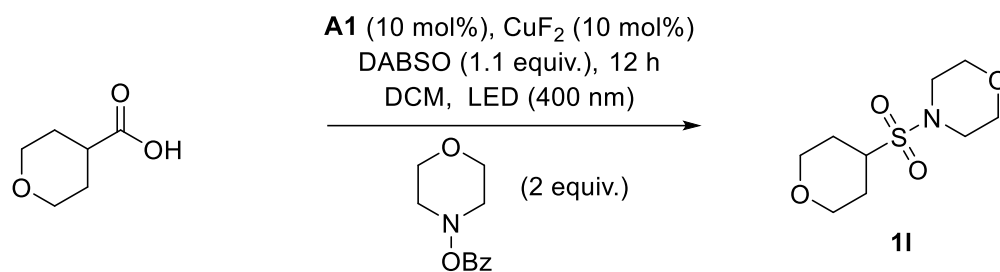

According to **GP1**, the reaction was carried out with tetrahydro-2H-pyran-4-carboxylic acid (39 mg, 0.3 mmol), DABSO (79 mg, 0.33 mmol, 1.1 equiv.), *N*-(benzoyloxy)morpholine (124 mg, 0.6 mmol, 2 equiv.), acridine catalyst **A1** (9 mg, 0.03 mmol, 10 mol%), copper difluoride (3 mg, 0.03 mmol, 10 mol%), and degassed dichloromethane (6 mL). The test-tube was capped and the reaction mixture was irradiated with LED light ( $\lambda = 400 \text{ nm}$ ) while stirring for 12 h. The reaction mixture was then quenched with saturated solution of sodium hydrogen carbonate (3 mL) and extracted with ethyl acetate ( $3 \times 10 \text{ mL}$ ). The organic layer was collected, dried over anhydrous sodium sulfate, concentrated under reduced pressure, and the remaining material was purified by flash chromatography on silica gel (hexane/ ethyl acetate 1 : 4 v/v) to give the sulfone product **11** (51 mg, 72%) as a colorless solid.

m.p.: 80–82 °C. –  $^1\text{H}$  NMR (500 MHz,  $\text{CDCl}_3$ ): 4.05 (2 H, ddd,  $J = 11.6, 4.7, 1.8 \text{ Hz}$ ), 3.73–3.66 (4 H, m), 3.41–3.29 (6 H, m), 3.13 (1 H, tt,  $J = 11.8, 4.0 \text{ Hz}$ ), 1.99–1.75 (4 H, m) ppm. –  $^{13}\text{C}$  NMR (125 MHz,  $\text{CDCl}_3$ ): 67.1, 66.6, 58.4, 46.5, 26.7 ppm. – IR: 2957, 2920, 2851, 1717, 1444, 1366, 1317, 1298, 1261, 1233, 1137, 1108, 1077, 1019, 984, 888, 788, 717  $\text{cm}^{-1}$ . – HRMS: calcd for  $\text{C}_9\text{H}_{17}\text{NNaO}_4\text{S}$ : 258.0770, found 258.0771  $[\text{M}+\text{H}^+]$ .

## Methyl (1*S*,2*R*)-2-(morpholinosulfonyl)cyclohexane-1-carboxylate (**1m**)

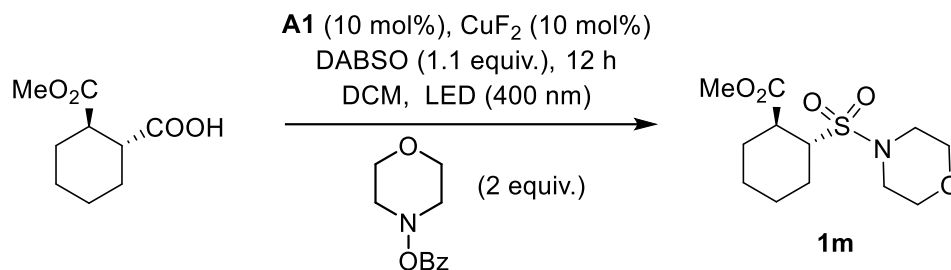

According to **GP1**, the reaction was carried out with (1*R*,2*R*)-2-(methoxycarbonyl)cyclohexane-1-carboxylic acid (56 mg, 0.3 mmol), DABSO (79 mg, 0.33 mmol, 1.1 equiv.), *N*-(benzoyloxy)morpholine (124 mg, 0.6 mmol, 2 equiv.), acridine catalyst **A1** (9 mg, 0.03 mmol, 10 mol%), copper difluoride (3 mg, 0.03 mmol, 10 mol%) in degassed dichloromethane (6 mL). The test-tube was capped and the reaction mixture was irradiated with LED light ( $\lambda = 400$  nm) while stirring for 12 h. The reaction mixture was then quenched with saturated solution of sodium hydrogen carbonate (3 mL) and extracted with ethyl acetate ( $3 \times 10$  mL). The organic layer was collected, dried over anhydrous sodium sulfate, concentrated under reduced pressure, and the remaining material was purified by flash chromatography on silica gel (hexane/ethyl acetate 7 : 3 v/v) to give the sulfonamide product **1m** (59 mg, 68%) as a yellow liquid.

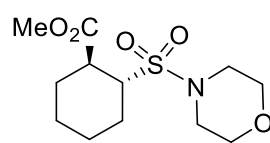  $^1\text{H}$  NMR (500 MHz,  $\text{CDCl}_3$ ): 3.74 (7 H, tq,  $J = 9.2, 4.5$  Hz), 3.44 (1 H, td,  $J = 11.7, 5.4$  Hz), 3.31 (4 H, q,  $J = 5.4$  Hz), 2.67 (1 H, ddd,  $J = 15.8, 9.6, 3.9$  Hz), 2.12 (2 H, ddt,  $J = 47.0, 13.7, 4.1$  Hz), 1.97–1.86 (1 H, m), 1.82–1.72 (1 H, m), 1.71–1.45 (2 H, m), 1.41–1.21 (2 H, m) ppm. –  $^{13}\text{C}$  NMR (125 MHz,  $\text{CDCl}_3$ ): 174.8, 68.1, 67.0, 61.0, 52.3, 46.3, 43.7, 30.5, 25.7, 25.7, 24.4, 24.1 ppm. – IR: 2985, 2922, 2860, 1732, 1453, 1322, 1261, 1221, 1149, 1114, 1074, 952, 737  $\text{cm}^{-1}$ . – HRMS: calcd for  $\text{C}_{12}\text{H}_{21}\text{NO}_5\text{SNa}$ : 314.1033, found 314.1031  $[\text{M}+\text{Na}^+]$ .

**Ethyl (1*R*,2*S*,4*S*)-3-(morpholinosulfonyl)bicyclo[2.2.1]heptane-2-carboxylate (1n)**

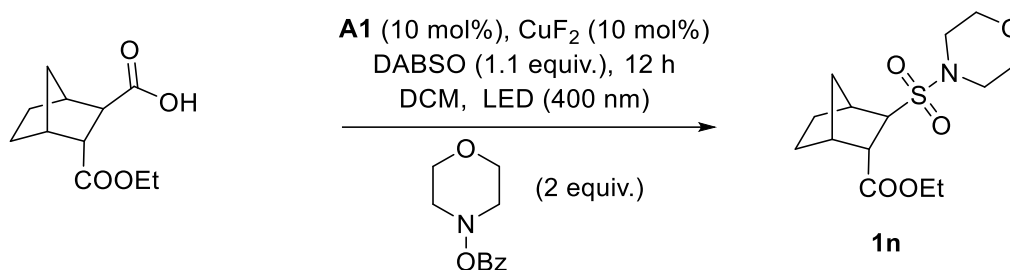

According to **GP1**, the reaction was carried out with (1*S*,3*R*,4*R*)-3-(ethoxycarbonyl)bicyclo[2.2.1]heptane-2-carboxylic acid (64 mg, 0.3 mmol), DABSO (79 mg, 0.33 mmol, 1.1 equiv.), *N*-(benzoyloxy)morpholine (124 mg, 0.6 mmol, 2 equiv.), acridine catalyst **A1** (9 mg, 0.03 mmol, 10 mol%), copper difluoride (3 mg, 0.03 mmol, 10 mol%), and degassed dichloromethane (6 mL). The test-tube was capped and the reaction mixture was irradiated with LED light ( $\lambda = 400$  nm) while stirring for 12 h. The reaction mixture was then quenched with saturated solution of sodium hydrogen carbonate (3 mL) and extracted with ethyl acetate (3  $\times$  10 mL). The organic layer was collected, dried over anhydrous sodium sulfate, concentrated under reduced pressure, and the remaining material was purified by flash chromatography on silica gel (hexane/ ethyl acetate 1 : 1 v/v) to give the sulfone product **1n** (75 mg, 79%) as a colorless oil.

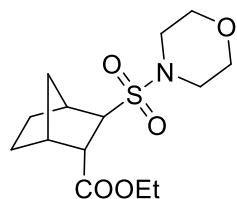

<sup>1</sup>H NMR (500 MHz, CDCl<sub>3</sub>): 4.21 (2 H, q,  $J = 7.1$  Hz), 3.67 (4 H, ddd,  $J = 5.3, 3.9, 1.3$  Hz), 3.45 (1 H, dd,  $J = 5.8, 1.4$  Hz), 3.32–3.25 (2 H, m), 3.25–3.19 (2 H, m), 3.11 (1 H, ddd,  $J = 6.0, 4.3, 1.9$  Hz), 2.79 (1 H, dd,  $J = 4.4, 1.5$  Hz), 2.69 (1 H, td,  $J = 4.2, 1.6$  Hz), 2.02 (1 H, dt,  $J = 10.4, 1.9$  Hz), 1.68

(1 H, tt,  $J = 12.5, 4.7$  Hz), 1.49 (1 H, ttd,  $J = 12.6, 4.2, 1.9$  Hz), 1.39–1.31 (2 H, m), 1.29 (3 H, t,  $J = 7.1$  Hz), 1.22 (1 H, dddd,  $J = 1.8, 8.9, 4.5, 2.2$  Hz) ppm. – <sup>13</sup>C NMR (125 MHz, CDCl<sub>3</sub>): 172.3, 66.9, 63.5, 61.4, 50.1, 45.9, 40.6, 40.1, 38.4, 29.3, 24.0, 14.5 ppm. – IR: 2975, 2930, 2860, 1727, 1454, 1325, 1296, 1260, 1220, 1187, 1151, 1114, 1074, 951, 733 cm<sup>-1</sup>. – HRMS: calcd for C<sub>14</sub>H<sub>24</sub>NO<sub>5</sub>S: 318.1370, found 318.1360 [M+H<sup>+</sup>].

4-((1-Phenylcyclopropyl)sulfonyl)morpholine (**1o**)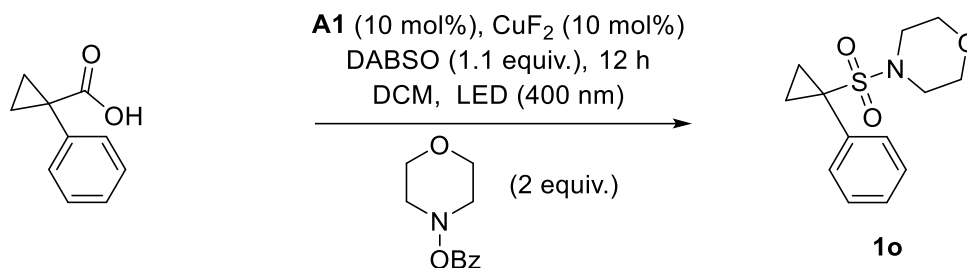

According to **GP1**, the reaction was carried out with 1-phenylcyclopropane-1-carboxylic acid (49 mg, 0.3 mmol), DABSO (79 mg, 0.33 mmol, 1.1 equiv.), *N*-(benzyloxy)morpholine (124 mg, 0.6 mmol, 2 equiv.), acridine catalyst **A1** (9 mg, 0.03 mmol, 10 mol%), copper difluoride (3 mg, 0.03 mmol, 10 mol%), and degassed dichloromethane (6 mL). The test-tube was capped and the reaction mixture was irradiated with LED light ( $\lambda = 400$  nm) while stirring for 12 h. The reaction mixture was then quenched with saturated solution of sodium hydrogen carbonate (3 mL) and extracted with ethyl acetate ( $3 \times 10$  mL). The organic layer was collected, dried over anhydrous sodium sulfate, concentrated under reduced pressure, and the remaining material was purified by flash chromatography on silica gel (hexane/ ethyl acetate 4 : 1 v/v) to give the sulfone product **1o** (48 mg, 60%) as a colorless solid.

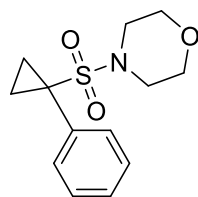

m.p.: 78–80 °C. –  $^1\text{H}$  NMR (500 MHz,  $\text{CDCl}_3$ ): 7.59–7.53 (2 H, m), 7.40–7.32 (3 H, m), 3.56–3.50 (2 H, m), 3.03–2.95 (2 H, m), 1.75–1.70 (2 H, m), 1.23 (2 H, m) ppm. –  $^{13}\text{C}$  NMR (125 MHz,  $\text{CDCl}_3$ ): 134.6, 132.0, 129.2, 128.6, 66.9, 46.5, 44.3, 12.4 ppm. – IR: 2984, 2914, 2857, 1496, 1447, 1334, 1313, 1260, 1215, 1138, 1115, 1069, 1043, 952, 932, 903, 804, 770, 720, 702  $\text{cm}^{-1}$ . – HRMS: calcd for  $\text{C}_{13}\text{H}_{18}\text{NO}_3\text{S}$ : 268.1002, found 268.1009  $[\text{M}+\text{H}^+]$ .



**4-((4-Methyltetrahydro-2H-pyran-4-yl)sulfonyl)morpholine (1p)**

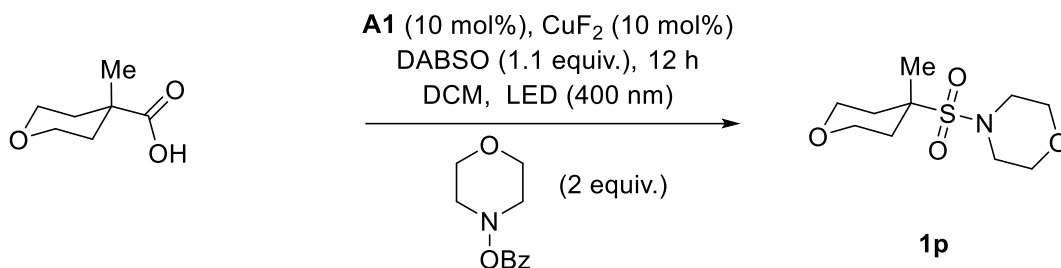

According to **GP1**, the reaction was carried out with 4-methyltetrahydro-2H-pyran-4-carboxylic acid (43 mg, 0.3 mmol), DABSO (79 mg, 0.33 mmol, 1.1 equiv.), N-(benzyloxy)morpholine (124 mg, 0.6 mmol, 2 equiv.), acridine catalyst **A1** (9 mg, 0.03 mmol, 10 mol%), copper difluoride (3 mg, 0.03 mmol, 10 mol%), and degassed dichloromethane (6 mL). The test-tube was capped and the reaction mixture was irradiated with LED light ( $\lambda = 400$  nm) while stirring for 12 h. The reaction mixture was then quenched with saturated solution of sodium hydrogen carbonate (3 mL) and extracted with ethyl acetate ( $3 \times 10$  mL). The organic layer was collected, dried over anhydrous sodium sulfate, concentrated under reduced pressure, and the remaining material was purified by flash chromatography on silica gel (hexane/ ethyl acetate 1 : 4 v/v) to give the sulfone product **1p** (50 mg, 67%) as a slightly yellow solid.

m.p.: 70–72 °C – <sup>1</sup>H NMR (500 MHz, CDCl<sub>3</sub>) 3.90 (2 H, ddd,  $J = 12.1, 5.1, 2.1$  Hz), 3.68 (4H, t,  $J = 4.7$  Hz), 3.48 (2 H, td,  $J = 12.0, 2.2$  Hz), 3.37 (4 H, t,  $J = 4.7$  Hz), 2.14 (2 H, td,  $J = 12.7, 5.1$  Hz), 1.54 (2 H, dt,  $J = 13.0, 2.4$  Hz), 1.46 (3H, s) ppm. – <sup>13</sup>C NMR (125 MHz, CDCl<sub>3</sub>): 67.3, 63.2, 62.2, 47.9, 31.2, 17.4 ppm. – IR: 2962, 2943, 2909, 2866, 1629, 1474, 1450, 1328, 1286, 1260, 1137, 1104, 1067, 1039, 1010, 938, 851, 809, 718 cm<sup>-1</sup>. – HRMS: calcd for C<sub>10</sub>H<sub>19</sub>NNaO<sub>4</sub>S: 272.0927, found 272.0925 [M+Na<sup>+</sup>].

### 1-Phenyl-4-(piperidin-1-ylsulfonyl)butan-1-one (2a)

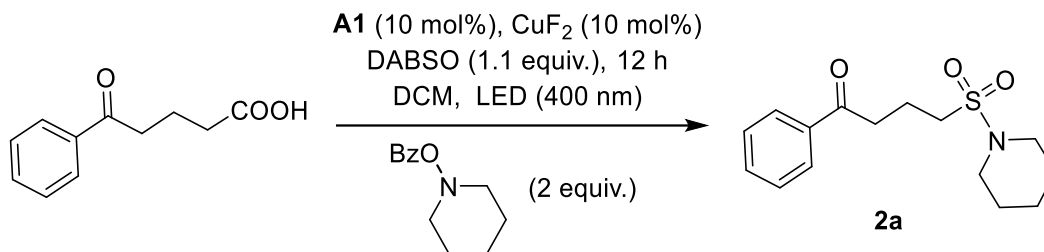

According to **GP1**, the reaction was carried out with 5-oxo-5-phenylpentanoic acid (58 mg, 0.3 mmol), DABSO (79 mg, 0.33 mmol, 1.1 equiv.), *N*-(benzoyloxy)piperidine (123 mg, 0.6 mmol, 2 equiv.), acridine catalyst **A1** (9 mg, 0.03 mmol, 10 mol%), copper difluoride (3 mg, 0.03 mmol, 10 mol%) in degassed dichloromethane (6 mL). The test-tube was capped and the reaction mixture was irradiated with LED light ( $\lambda = 400$  nm) while stirring for 12 h. The reaction mixture was then quenched with saturated solution of sodium hydrogen carbonate (3 mL) and extracted with ethyl acetate ( $3 \times 10$  mL). The organic layer was collected, dried over anhydrous sodium sulfate, concentrated under reduced pressure, and the remaining material was purified by flash chromatography on silica gel (hexane/ethyl acetate 7 : 3 v/v) to give the sulfonamide product **2a** (55 mg, 62%) as a yellow liquid.

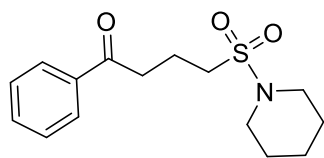

$^1\text{H}$  NMR (500 MHz,  $\text{CDCl}_3$ ): 7.98–7.93 (2 H, m), 7.61–7.52 (1 H, m), 7.46 (2 H, dd,  $J = 8.4, 7.1$  Hz), 3.28–3.16 (6 H, m), 3.03 (2 H, dd,  $J = 8.0, 6.7$  Hz), 2.30–2.18 (2 H, m), 1.70–1.51 (6 H, m) ppm. –

$^{13}\text{C}$  NMR (125 MHz,  $\text{CDCl}_3$ ): 198.9, 136.7, 133.5, 128.8, 128.1, 48.3, 46.8, 36.5, 25.8, 23.9, 17.9 ppm. – IR: 2986, 2945, 2850, 1739, 1685, 1558, 1332, 1265, 1161, 1143  $\text{cm}^{-1}$ . – HRMS: calcd for  $\text{C}_{15}\text{H}_{21}\text{NO}_3\text{SNa}$ : 318.1134, found 318.1133  $[\text{M}+\text{Na}^+]$ .

### 1-((Tetrahydro-2H-pyran-4-yl)sulfonyl)piperidine (**2b**)

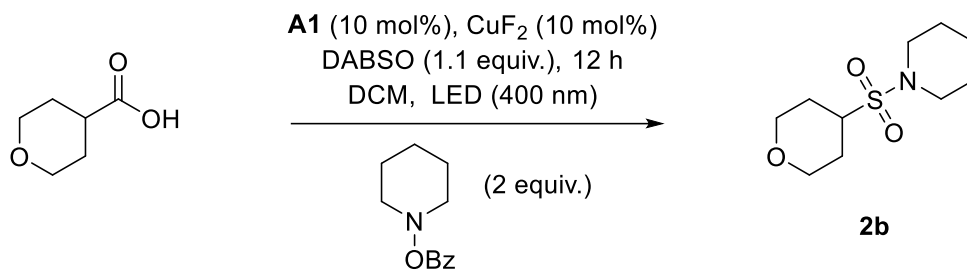

According to **GP1**, the reaction was carried out with tetrahydro-2H-pyran-4-carboxylic acid (39 mg, 0.3 mmol), DABSO (79 mg, 0.33 mmol, 1.1 equiv.), *N*-(benzoyloxy)piperidine (123 mg, 0.6 mmol, 2 equiv.), acridine catalyst **A1** (9 mg, 0.03 mmol, 10 mol%), copper difluoride (3 mg, 0.03 mmol, 10 mol%), and degassed dichloromethane (6 mL). The test-tube was capped and the reaction mixture was irradiated with LED light ( $\lambda = 400 \text{ nm}$ ) while stirring for 12 h. The reaction mixture was then quenched with saturated solution of sodium hydrogen carbonate (3 mL) and extracted with ethyl acetate ( $3 \times 10 \text{ mL}$ ). The organic layer was collected, dried over anhydrous sodium sulfate, concentrated under reduced pressure, and the remaining material was purified by flash chromatography on silica gel (hexane/ ethyl acetate 3 : 2 v/v) to give the sulfone product **2b** (56 mg, 80%) as a colorless solid.

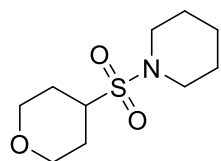

m.p.: 65–67 °C. –  $^1\text{H NMR}$  (500 MHz,  $\text{CDCl}_3$ ):  $^1\text{H NMR}$  (499 MHz, Chloroform-*d*)  $\delta$  4.09–3.99 (2 H, m), 3.38–3.24 (4 H, m), 3.09 (1 H, tt,  $J = 11.8, 4.0 \text{ Hz}$ ), 1.95–1.90 (2 H, m), 1.85 (2 H, qd,  $J = 12.3, 4.6 \text{ Hz}$ ), 1.62–1.54 (6 H, m) ppm. –  $^{13}\text{C NMR}$  (125 MHz,  $\text{CDCl}_3$ ):  $^{13}\text{C NMR}$  (75 MHz,  $\text{CDCl}_3$ )  $\delta$  66.79, 58.44, 47.38, 26.90, 26.30, 24.05 ppm. – IR: 2970, 2938, 2875, 2853, 1745, 1468, 1379, 1329, 1240, 1138, 1089, 1055, 953, 895, 738, 712  $\text{cm}^{-1}$ . – HRMS: calcd for  $\text{C}_{10}\text{H}_{20}\text{NO}_3\text{S}$ : 234.1158, found 234.1160  $[\text{M}+\text{H}^+]$ .

### 1-(Heptan-4-ylsulfonyl)piperidine (**2c**)

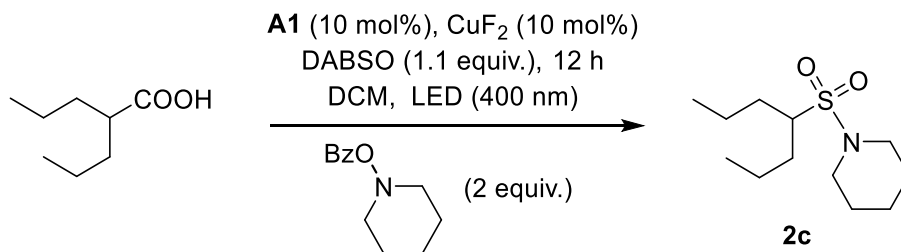

According to **GP1**, the reaction was carried out with 2-propylpentanoic acid (43 mg, 0.3 mmol), DABSO (79 mg, 0.33 mmol, 1.1 equiv.), N-(benzoyloxy)piperidine (123 mg, 0.6 mmol, 2 equiv.), acridine catalyst **A1** (9 mg, 0.03 mmol, 10 mol%), copper difluoride (3 mg, 0.03 mmol, 10 mol%) in degassed dichloromethane (6 mL). The test-tube was capped and the reaction mixture was irradiated with LED light ( $\lambda = 400 \text{ nm}$ ) while stirring for 12 h. The reaction mixture was then quenched with saturated solution of sodium hydrogen carbonate (3 mL) and extracted with ethyl acetate ( $3 \times 10 \text{ mL}$ ). The organic layer was collected, dried over anhydrous sodium sulfate, concentrated under reduced pressure, and the remaining material was purified by flash chromatography on silica gel (hexane/ethyl acetate 7 : 3 v/v) to give the sulfonamide product **2c** (54 mg, 73%) as a yellow liquid.

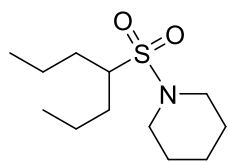

$^1\text{H NMR}$  (500 MHz,  $\text{CDCl}_3$ ): 3.34–3.27 (4 H, m), 2.88 (1 H, tt,  $J = 7.1, 4.8 \text{ Hz}$ ), 1.82 (2 H, dddd,  $J = 13.9, 10.4, 5.9, 4.7 \text{ Hz}$ ), 1.67–1.40 (12 H, m), 0.95 (6 H, t,  $J = 7.3 \text{ Hz}$ ) ppm. –  $^{13}\text{C NMR}$  (125 MHz,  $\text{CDCl}_3$ ): 61.6, 47.1, 31.0, 26.3, 24.1, 20.2, 14.2 ppm. – IR: 2958, 2936, 2872, 2855, 1764, 1465, 1330, 1319, 1161, 1134  $\text{cm}^{-1}$ . – HRMS: calcd for  $\text{C}_{12}\text{H}_{26}\text{NO}_2\text{S}$ : 248.1679, found 248.1679  $[\text{M}+\text{H}^+]$ .

**Methyl (1*S*\*,2*R*\*)-2-(piperidin-1-ylsulfonyl)cyclohexane-1-carboxylate (2d)**

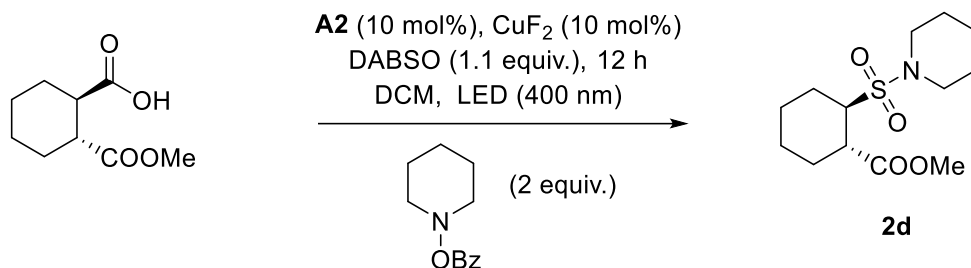

According to **GP1**, the reaction was carried out with (1*R*\*,2*R*\*)-2-(methoxycarbonyl)cyclohexane-1-carboxylic acid (56 mg, 0.3 mmol), DABSO (79 mg, 0.33 mmol, 1.1 equiv.), *N*-(benzoyloxy)piperidine (123 mg, 0.6 mmol, 2 equiv.), acridine catalyst **A1** (9 mg, 0.03 mmol, 10 mol%), copper difluoride (3 mg, 0.03 mmol, 10 mol%), and degassed dichloromethane (6 mL). The test-tube was capped and the reaction mixture was irradiated with LED light ( $\lambda = 400$  nm) while stirring for 12 h. The reaction mixture was then quenched with saturated solution of sodium hydrogen carbonate (3 mL) and extracted with ethyl acetate (3  $\times$  10 mL). The organic layer was collected, dried over anhydrous sodium sulfate, concentrated under reduced pressure, and the remaining material was purified by flash chromatography on silica gel (hexane/ ethyl acetate 3 : 2 v/v) to give the sulfone product **2d** (65 mg, 80%) as a colorless liquid.

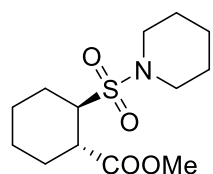 <sup>1</sup>H NMR (500 MHz, CDCl<sub>3</sub>): 3.69 (3 H, s), 3.34 (1 H, td, *J* = 11.5, 4.1 Hz), 3.27–3.13 (4 H, m), 2.62 (1 H, td, *J* = 11.4, 4.2 Hz), 2.10 (1 H, dd, *J* = 13.6, 4.0 Hz), 2.06–1.99 (1 H, m), 1.86–1.79 (1 H, m), 1.77–1.66 (1 H, m), 1.61–1.51 (7 H, m), 1.50–1.40 (1 H, m), 1.35–1.16 (2 H, m) ppm. – <sup>13</sup>C NMR (125 MHz, CDCl<sub>3</sub>): 174.9, 60.9, 52.2, 47.0, 43.7, 30.1, 26.1, 25.7, 24.4, 24.2, 24.0 ppm. – IR: 3014, 2959, 2862, 1737, 1445, 1365, 1322, 1278, 1217, 1163, 1138, 1053, 1023, 938 cm<sup>-1</sup>. – HRMS: calcd for C<sub>13</sub>H<sub>23</sub>NNaO<sub>4</sub>S: 312.1240, found 312.1241 [M+H<sup>+</sup>].

### 1-Adamantan-1-yl)sulfonyl)piperidine (**2e**)

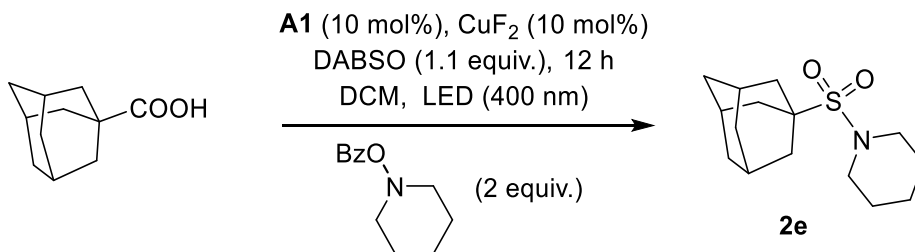

According to **GP1**, the reaction was carried out with adamantane-1-carboxylic acid (54 mg, 0.3 mmol), DABSO (79 mg, 0.33 mmol, 1.1 equiv.), N-(benzoyloxy)piperidine (123 mg, 0.6 mmol, 2 equiv.), acridine catalyst **A1** (9 mg, 0.03 mmol, 10 mol%), copper difluoride (3 mg, 0.03 mmol, 10 mol%) in degassed dichloromethane (6 mL). The test-tube was capped and the reaction mixture was irradiated with LED light ( $\lambda = 400 \text{ nm}$ ) while stirring for 12 h. The reaction mixture was then quenched with saturated solution of sodium hydrogen carbonate (3 mL) and extracted with ethyl acetate ( $3 \times 10 \text{ mL}$ ). The organic layer was collected, dried over anhydrous sodium sulfate, concentrated under reduced pressure, and the remaining material was purified by flash chromatography on silica gel (hexane/ethyl acetate 7 : 3 v/v) to give the sulfonamide product **2e** (58 mg, 68%) as a yellow solid.

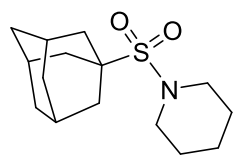

m.p.: 45–47°C. –  $^1\text{H}$  NMR (500 MHz,  $\text{CDCl}_3$ ): 3.42–3.23 (4 H, m), 2.14 (3 H, p,  $J = 3.1 \text{ Hz}$ ), 2.04–1.96 (6 H, m), 1.77–1.67 (6 H, m), 1.66–1.60 (6 H, m) ppm. –  $^{13}\text{C}$  NMR (125 MHz,  $\text{CDCl}_3$ ): 62.4, 48.3, 36.1, 36.0, 28.2, 26.5, 24.0 ppm. – IR: 2950, 2914, 2855, 1738, 1455, 1365, 1306, 1264, 1216, 1142, 1062, 943  $\text{cm}^{-1}$ . – HRMS: calcd for  $\text{C}_{15}\text{H}_{25}\text{NO}_2\text{SNa}$ : 306.1498, found 306.1497 [ $\text{M}+\text{Na}^+$ ].

### 1-(*tert*-Pentylsulfonyl)piperidine (**2f**)

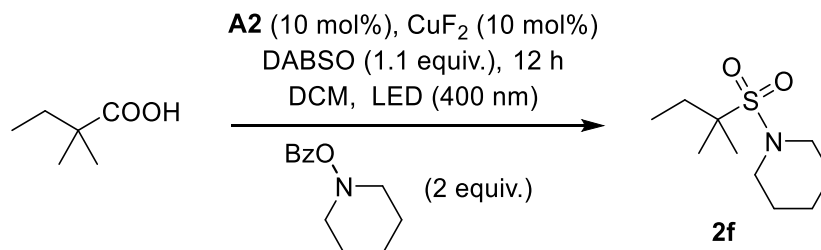

According to **GP1**, the reaction was carried out with 2,2-dimethylbutanoic acid (35 mg, 0.3 mmol), DABSO (79 mg, 0.33 mmol, 1.1 equiv.), N-(benzyloxy)piperidine (123 mg, 0.6 mmol, 2 equiv.), acridine catalyst **A1** (9 mg, 0.03 mmol, 10 mol%), copper difluoride (3 mg, 0.03 mmol, 10 mol%) in degassed dichloromethane (6 mL). The test-tube was capped and the reaction mixture was irradiated with LED light ( $\lambda = 400$  nm) while stirring for 12 h. The reaction mixture was then quenched with saturated solution of sodium hydrogen carbonate (3 mL) and extracted with ethyl acetate (3  $\times$  10 mL). The organic layer was collected, dried over anhydrous sodium sulfate, concentrated under reduced pressure, and the remaining material was purified by flash chromatography on silica gel (hexane/ethyl acetate 7 : 3 v/v) to give the sulfonamide product **2f** (49 mg, 74%) as a yellow liquid.

<sup>1</sup>H NMR (500 MHz, CDCl<sub>3</sub>): 3.43–3.25 (4 H, m), 1.78 (2 H, q,  $J = 7.6$  Hz), 1.67–1.56 (6 H, m), 1.29 (6 H, s), 0.97 (3 H, t,  $J = 7.6$  Hz) ppm. – <sup>13</sup>C NMR (125 MHz, CDCl<sub>3</sub>): 64.8, 48.6, 28.9, 26.61, 24.1, 21.0, 8.5 ppm. – IR: 3014, 2975, 2953, 2901, 2862, 1712, 1478, 1315, 1261, 1180, 1116, 1067, 952, 715 cm<sup>-1</sup>. – HRMS: calcd for C<sub>10</sub>H<sub>21</sub>NO<sub>2</sub>SNa: 242.1185, found 242.1185 [M+Na<sup>+</sup>].

***N*-(*tert*-Butyl)-4-phenylbutane-1-sulfonamide (3a)**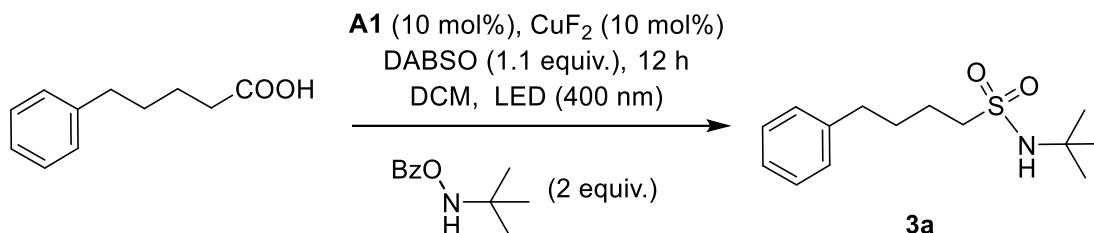

According to **GP1**, the reaction was carried out with 5-phenylpentanoic acid (53 mg, 0.3 mmol), DABSO (79 mg, 0.33 mmol, 1.1 equiv.), *O*-benzoyl-*N*-(*tert*-butyl)hydroxylamine (116 mg, 0.6 mmol, 2 equiv.), acridine catalyst **A1** (9 mg, 0.03 mmol, 10 mol%), copper difluoride (3 mg, 0.03 mmol, 10 mol%) in degassed dichloromethane (6 mL). The test-tube was capped and the reaction mixture was irradiated with LED light ( $\lambda = 400$  nm) while stirring for 12 h. The reaction mixture was then quenched with saturated solution of sodium hydrogen carbonate (3 mL) and extracted with ethyl acetate ( $3 \times 10$  mL). The organic layer was collected, dried over anhydrous sodium sulfate, concentrated under reduced pressure, and the remaining material was purified by flash chromatography on silica gel (hexane/ethyl acetate 7 : 3 v/v) to give the sulfonamide product **3a** (74 mg, 92%) as a yellow liquid.

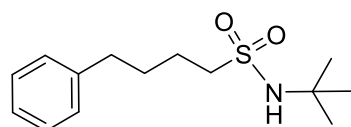

$^1\text{H}$  NMR (500 MHz,  $\text{CDCl}_3$ ): 7.30–7.26 (2 H, m), 7.22–7.15 (3 H, m), 4.30 (1 H, s), 3.10–2.97 (2 H, m), 2.65 (2 H, t,  $J = 7.5$  Hz), 1.90–1.81 (2 H, m), 1.80–1.71 (2 H, m), 1.34 (9 H, s) ppm. –  $^{13}\text{C}$

NMR (125 MHz,  $\text{CDCl}_3$ ): 141.6, 128.5, 128.5, 126.1, 56.1, 54.6, 35.5, 30.4, 30.1, 23.8 ppm. – IR: 3460, 3277, 3071, 3016, 2970, 2944, 2873, 1739, 1434, 1365, 1228, 1217, 1138, 1092, 900  $\text{cm}^{-1}$ . – HRMS: calcd for  $\text{C}_{14}\text{H}_{23}\text{NO}_2\text{SNa}$ : 292.1342, found 292.1339 [ $\text{M}+\text{Na}^+$ ].



***N*-(*tert*-Butyl)tetrahydro-2*H*-pyran-4-sulfonamide (3b)**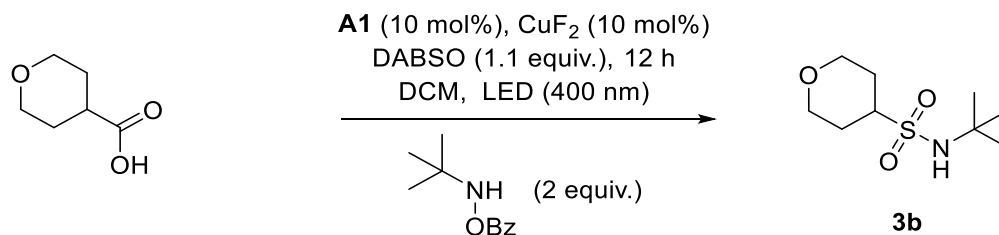

According to **GP1**, the reaction was carried out with tetrahydro-2*H*-pyran-4-carboxylic acid (39 mg, 0.3 mmol), DABSO (79 mg, 0.33 mmol, 1.1 equiv.), *O*-benzoyl-*N*-(*tert*-butyl)hydroxylamine (116 mg, 0.6 mmol, 2 equiv.), acridine catalyst **A1** (9 mg, 0.03 mmol, 10 mol%), copper difluoride (3 mg, 0.03 mmol, 10 mol%), and degassed dichloromethane (6 mL). The test-tube was capped and the reaction mixture was irradiated with LED light ( $\lambda = 400 \text{ nm}$ ) while stirring for 12 h. The reaction mixture was then quenched with saturated solution of sodium hydrogen carbonate (3 mL) and extracted with ethyl acetate ( $3 \times 10 \text{ mL}$ ). The organic layer was collected, dried over anhydrous sodium sulfate, concentrated under reduced pressure, and the remaining material was purified by flash chromatography on silica gel (hexane/ ethyl acetate 7 : 3 v/v) to give the sulfone product **3b** (52 mg, 78%) as a slightly yellow solid.

m.p.: 117–119 °C. –  $^1\text{H}$  NMR (500 MHz,  $\text{CDCl}_3$ ): 4.49 (1 H, s), 4.10–4.03 (2 H, m), 3.34 (2 H, td,  $J = 12.0, 2.1 \text{ Hz}$ ), 2.99 (1 H, tt,  $J = 11.9, 3.8 \text{ Hz}$ ), 2.00 (2 H, ddt,  $J = 12.8, 4.1, 2.0 \text{ Hz}$ ), 1.84 (2 H, dtd,  $J = 13.4, 12.0, 4.7 \text{ Hz}$ ), 1.35 (9 H, s) ppm. –  $^{13}\text{C}$  NMR (125 MHz,  $\text{CDCl}_3$ ): 66.7, 60.5, 54.9, 30.5, 26.8 ppm. – IR: 3193, 2968, 2942, 2857, 1472, 1446, 1385, 1311, 1300, 1263, 1234, 1127, 1005, 921, 889, 787, 733  $\text{cm}^{-1}$ . – HRMS: calcd for  $\text{C}_9\text{H}_{19}\text{NNaO}_3\text{S}$ : 244.0978, found 244.0976 [ $\text{M}+\text{Na}^+$ ].

***tert*-Butyl 4-(*N*-(*tert*-butyl)sulfamoyl)piperidine-1-carboxylate (**3c**)**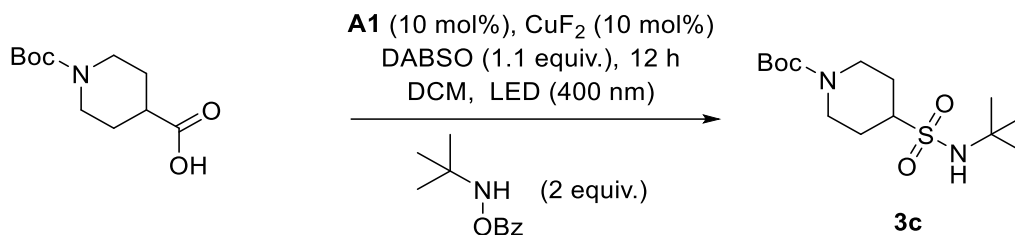

According to **GP1**, the reaction was carried out with 1-(*tert*-butoxycarbonyl)piperidine-4-carboxylic acid (69 mg, 0.3 mmol), DABSO (79 mg, 0.33 mmol, 1.1 equiv.), *O*-benzoyl-*N*-(*tert*-butyl)hydroxylamine (116 mg, 0.6 mmol, 2 equiv.), acridine catalyst **A1** (9 mg, 0.03 mmol, 10 mol%), copper difluoride (3 mg, 0.03 mmol, 10 mol%), and degassed dichloromethane (6 mL). The test-tube was capped and the reaction mixture was irradiated with LED light ( $\lambda = 400$  nm) while stirring for 12 h. The reaction mixture was then quenched with saturated solution of sodium hydrogen carbonate (3 mL) and extracted with ethyl acetate (3  $\times$  10 mL). The organic layer was collected, dried over anhydrous sodium sulfate, concentrated under reduced pressure, and the remaining material was purified by flash chromatography on silica gel (hexane/ ethyl acetate 3 : 2 v/v) to give the sulfone product **3c** (70 mg, 73%) as a colorless solid.

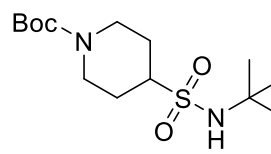
 m.p.: 128–130 °C. – <sup>1</sup>H NMR (500 MHz, CDCl<sub>3</sub>): 4.31 (1 H, s), 4.23 (1 H, s), 2.90 (1 H, tt, *J* = 11.9, 3.7 Hz), 2.75–2.55 (2 H, m), 2.08 (2 H, ddd, *J* = 12.6, 4.0, 2.1 Hz), 1.67 (2 H, qd, *J* = 12.5, 4.6 Hz), 1.43 (9 H, s), 1.35 (9H, s) ppm. – <sup>13</sup>C NMR (125 MHz, CDCl<sub>3</sub>): 154.5, 80.0, 61.7, 55.0, 42.8, 30.5, 28.5, 26.2 ppm. – IR: 3295, 2972, 2961, 2928, 2872, 1709, 1670, 1421, 1363, 1316, 1222, 1133, 1002, 880, 731 cm<sup>-1</sup>. – HRMS: calcd for C<sub>14</sub>H<sub>28</sub>N<sub>2</sub>NaO<sub>4</sub>S: 343.1662, found 343.1656 [M+Na<sup>+</sup>].

***N*-(*tert*-Butyl)-2-methylpropane-2-sulfonamide (3d)**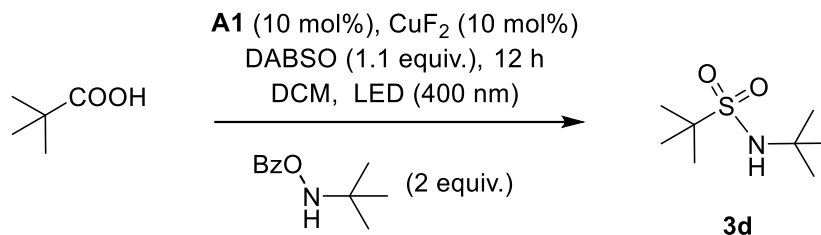

According to **GP1**, the reaction was carried out with pivalic acid (31 mg, 0.3 mmol), DABSO (79 mg, 0.33 mmol, 1.1 equiv.), *O*-benzoyl-*N*-(*tert*-butyl)hydroxylamine (116 mg, 0.6 mmol, 2 equiv.), acridine catalyst **A1** (9 mg, 0.03 mmol, 10 mol%), copper difluoride (3 mg, 0.03 mmol, 10 mol%) in degassed dichloromethane (6 mL). The test-tube was capped and the reaction mixture was irradiated with LED light ( $\lambda = 400$  nm) while stirring for 12 h. The reaction mixture was then quenched with saturated solution of sodium hydrogen carbonate (3 mL) and extracted with ethyl acetate (3  $\times$  10 mL). The organic layer was collected, dried over anhydrous sodium sulfate, concentrated under reduced pressure, and the remaining material was purified by flash chromatography on silica gel (hexane/ethyl acetate 7 : 3 v/v) to give the sulfonamide product **3d** (37 mg, 63%) as a yellow liquid.

$^1\text{H NMR}$  (500 MHz,  $\text{CDCl}_3$ ): 3.50 (1 H, s), 1.43–1.40 (18 H, m) ppm. –  $^{13}\text{C}$  NMR (125 MHz,  $\text{CDCl}_3$ ): 59.6, 56.0, 30.9, 24.5 ppm. – IR: 3055, 2985, 2326, 2260, 1738, 1367, 1304, 1264, 1122, 907  $\text{cm}^{-1}$ . – HRMS: calcd for  $\text{C}_8\text{H}_{19}\text{NO}_2\text{SNa}$ : 216.1029, found 216.1028 [ $\text{M}+\text{Na}^+$ ].

***N*-(*tert*-Butyl)adamantane-1-sulfonamide (3e)**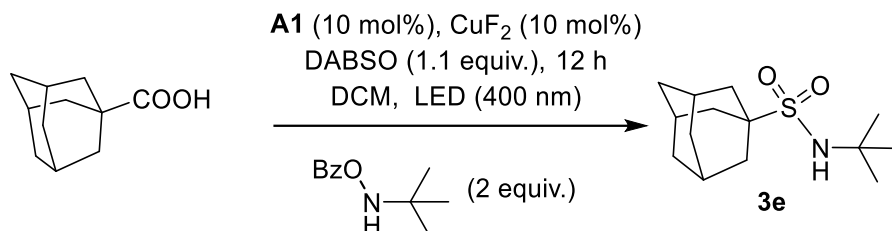

According to **GP1**, the reaction was carried out with adamantane-1-carboxylic acid (54 mg, 0.3 mmol), DABSO (79 mg, 0.33 mmol, 1.1 equiv.), *O*-benzoyl-*N*-(*tert*-butyl)hydroxylamine (116 mg, 0.6 mmol, 2 equiv.), acridine catalyst **A1** (9 mg, 0.03 mmol, 10 mol%), copper difluoride (3 mg, 0.03 mmol, 10 mol%) in degassed dichloromethane (6 mL). The test-tube was capped and the reaction mixture was irradiated with LED light ( $\lambda$  = 400 nm) while stirring for 12 h. The reaction mixture was then quenched with saturated solution of sodium hydrogen carbonate (3 mL) and extracted with ethyl acetate (3  $\times$  10 mL). The organic layer was collected, dried over anhydrous sodium sulfate, concentrated under reduced pressure, and the remaining material was purified by flash chromatography on silica gel (hexane/ethyl acetate 7 : 3 v/v) to give the sulfonamide product **3e** (49 mg, 60%) as a white solid.

Chemical structure of **3e** is shown. m.p.: 118–120°C. – <sup>1</sup>H NMR (500 MHz, CDCl<sub>3</sub>): 3.43 (1 H, s), 2.13 (3 H, q, *J* = 3.1 Hz), 2.00 (6 H, d, *J* = 3.0 Hz), 1.75–1.64 (6 H, m), 1.38 (9 H, s) ppm. – <sup>13</sup>C NMR (125 MHz, CDCl<sub>3</sub>): 60.5, 55.6, 35.9, 35.7, 30.8, 28.2 ppm. – IR: 3288, 2994, 2960, 2897, 2852, 1737, 1455, 1426, 1288, 1228, 1133, 982 cm<sup>-1</sup>. – HRMS: calcd for C<sub>14</sub>H<sub>25</sub>NO<sub>2</sub>SNa: 294.1498, found 294.1496 [M+Na<sup>+</sup>].

***N*-(*tert*-Butyl)-5-(2,5-dimethylphenoxy)-2-methylpentane-2-sulfonamide****(3f)**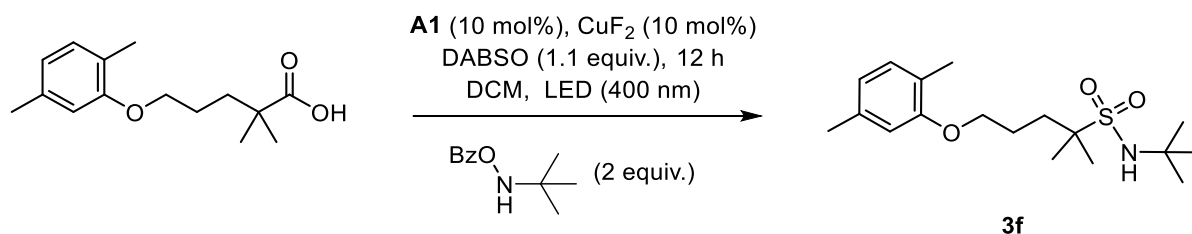

According to **GP1**, the reaction was carried out with gemfibrozil (75 mg, 0.3 mmol), DABSO (79 mg, 0.33 mmol, 1.1 equiv.), *O*-benzoyl-*N*-(*tert*-butyl)hydroxylamine (116 mg, 0.6 mmol, 2 equiv.), acridine catalyst **A1** (9 mg, 0.03 mmol, 10 mol%), copper difluoride (3 mg, 0.03 mmol, 10 mol%) in degassed dichloromethane (6 mL). The test-tube was capped and the reaction mixture was irradiated with LED light ( $\lambda = 400$  nm) while stirring for 12 h. The reaction mixture was then quenched with saturated solution of sodium hydrogen carbonate (3 mL) and extracted with ethyl acetate (3  $\times$  10 mL). The organic layer was collected, dried over anhydrous sodium sulfate, concentrated under reduced pressure, and the remaining material was purified by flash chromatography on silica gel (hexane/ethyl acetate 7 : 3 v/v) to give the sulfonamide product **3f** (58 mg, 57%) as a yellow solid.

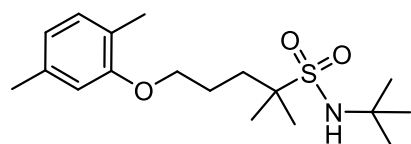

m.p.: 50–52°C. –  $^1\text{H}$  NMR (500 MHz,  $\text{CDCl}_3$ ): 7.01 (1 H, d,  $J = 7.5$  Hz), 6.67 (1 H, dd,  $J = 7.6, 1.6$  Hz), 6.62 (1 H, d,  $J = 1.6$  Hz), 3.97 (2 H, t,  $J = 5.9$  Hz), 3.58 (1 H, s), 2.31 (3 H, s), 2.18

(3 H, s), 1.97 (2 H, qd,  $J = 6.3, 2.6$  Hz), 1.93–1.84 (2 H, m), 1.40 (9 H, s), 1.39 (6 H, s) ppm. –  $^{13}\text{C}$  NMR (125 MHz,  $\text{CDCl}_3$ ): 156.9, 136.6, 130.5, 123.7, 121.0, 112.1, 67.8, 62.5, 56.1, 32.8, 30.9, 24.6, 21.6, 21.5, 15.9 ppm. – IR: 3295, 2977, 2929, 2862, 1732, 1670, 1422, 1392, 1317, 1285, 1229, 1166, 1134, 1070, 1002, 880, 787  $\text{cm}^{-1}$ . – HRMS: calcd for  $\text{C}_{18}\text{H}_{31}\text{NNaO}_3\text{S}$ : 364.1917, found 364.1915  $[\text{M}+\text{Na}^+]$ .

### N-Benzylpentadecane-1-sulfonamide (**4a**)

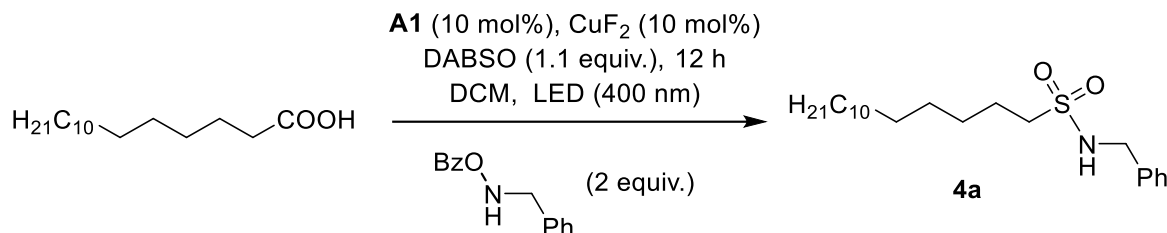

According to **GP1**, the reaction was carried out with palmitic acid (77 mg, 0.3 mmol), DABSO (79 mg, 0.33 mmol, 1.1 equiv.), *O*-benzoyl-*N*-benzylhydroxylamine (136 mg, 0.6 mmol, 2 equiv.), acridine catalyst **A1** (9 mg, 0.03 mmol, 10 mol%), copper difluoride (3 mg, 0.03 mmol, 10 mol%) in degassed dichloromethane (6 mL). The test-tube was capped and the reaction mixture was irradiated with LED light ( $\lambda = 400$  nm) while stirring for 12 h. The reaction mixture was then quenched with saturated solution of sodium hydrogen carbonate (3 mL) and extracted with ethyl acetate ( $3 \times 10$  mL). The organic layer was collected, dried over anhydrous sodium sulfate, concentrated under reduced pressure, and the remaining material was purified by flash chromatography on silica gel (hexane/ethyl acetate 3 : 2 v/v) to give the sulfonamide product **4a** (62 mg, 54%) as a white solid.

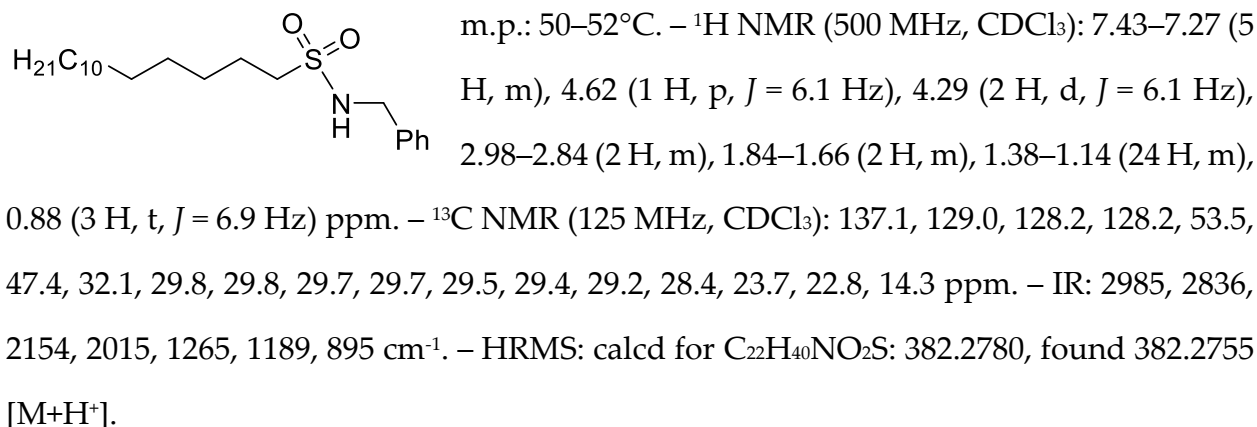

**N-Benzyltetrahydro-2H-pyran-4-sulfonamide (4b)**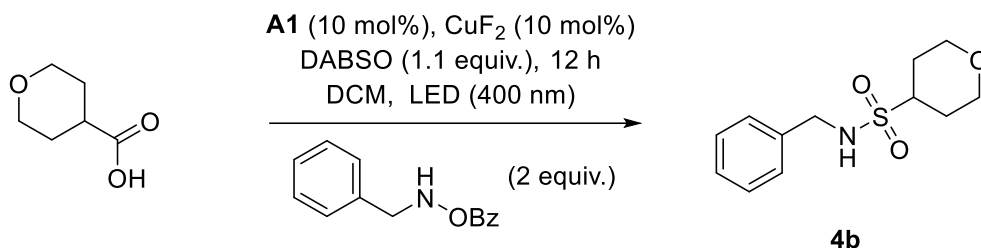

According to **GP1**, the reaction was carried out with tetrahydro-2H-pyran-4-carboxylic acid (39 mg, 0.3 mmol), DABSO (79 mg, 0.33 mmol, 1.1 equiv.), *O*-benzoyl-*N*-benzylhydroxylamine (136 mg, 0.6 mmol, 2 equiv.), acridine catalyst **A1** (9 mg, 0.03 mmol, 10 mol%), copper difluoride (3 mg, 0.03 mmol, 10 mol%), and degassed dichloromethane (6 mL) were added. The test-tube was capped and the reaction mixture was irradiated with LED light ( $\lambda = 400$  nm) while stirring for 12 h. The reaction mixture was then quenched with saturated solution of sodium hydrogen carbonate (3 mL) and extracted with ethyl acetate ( $3 \times 10$  mL). The organic layer was collected, dried over anhydrous sodium sulfate, concentrated under reduced pressure, and the remaining material was purified by flash chromatography on silica gel (hexane/ ethyl acetate 3 : 2 v/v) to give the sulfone product **4b** (44 mg, 57%) as a colorless solid.

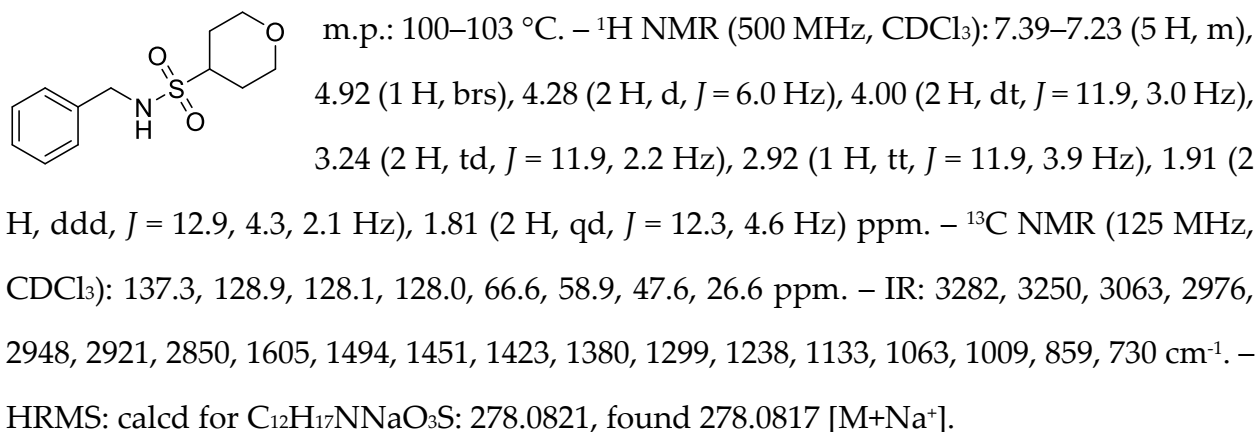

### N-Benzyl-2-methylpropane-2-sulfonamide (**4c**)

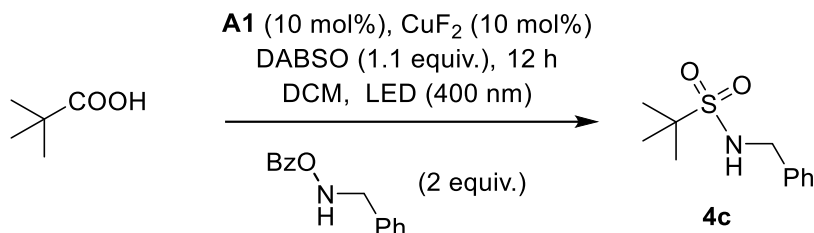

According to **GP1**, the reaction was carried out with pivalic acid (31 mg, 0.3 mmol), DABSO (79 mg, 0.33 mmol, 1.1 equiv.), *O*-benzoyl-*N*-benzylhydroxylamine (136 mg, 0.6 mmol, 2 equiv.), acridine catalyst **A1** (9 mg, 0.03 mmol, 10 mol%), copper difluoride (3 mg, 0.03 mmol, 10 mol%) in degassed dichloromethane (6 mL). The test-tube was capped and the reaction mixture was irradiated with LED light ( $\lambda = 400$  nm) while stirring for 12 h. The reaction mixture was then quenched with saturated solution of sodium hydrogen carbonate (3 mL) and extracted with ethyl acetate ( $3 \times 10$  mL). The organic layer was collected, dried over anhydrous sodium sulfate, concentrated under reduced pressure, and the remaining material was purified by flash chromatography on silica gel (hexane/ethyl acetate 7 : 3 v/v) to give the sulfonamide product **4c** (34 mg, 50%) as a white solid.

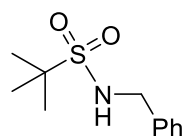

m.p.: 83–85°C. –  $^1\text{H}$  NMR (500 MHz,  $\text{CDCl}_3$ ): 7.38–7.28 (5 H, m), 4.36 (2 H, d,  $J = 6.0$  Hz), 4.20 (1 H, d,  $J = 6.9$  Hz), 1.42 (9 H, s) ppm. –  $^{13}\text{C}$  NMR (125 MHz,  $\text{CDCl}_3$ ): 137.9, 128.9, 128.0, 127.9, 60.2, 48.7, 24.5 ppm. – IR: 3284, 3025, 2971, 1875, 1606, 1495, 1474, 1453, 1395, 1364, 1296, 1202, 1118, 1094  $\text{cm}^{-1}$ . – HRMS: calcd for  $\text{C}_{11}\text{H}_{17}\text{NO}_2\text{SNa}$ : 250.0872, found 250.0872  $[\text{M}+\text{Na}^+]$ .



### N-Benzyladamantane-1-sulfonamide (**4d**)

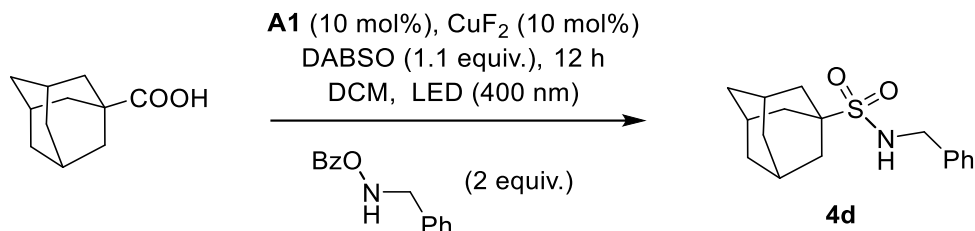

According to **GP1**, the reaction was carried out with adamantane-1-carboxylic acid (54 mg, 0.3 mmol), DABSO (79 mg, 0.33 mmol, 1.1 equiv.), *O*-benzoyl-*N*-benzylhydroxylamine (136 mg, 0.6 mmol, 2 equiv.), acridine catalyst **A1** (9 mg, 0.03 mmol, 10 mol%), copper difluoride (3 mg, 0.03 mmol, 10 mol%) in degassed dichloromethane (6 mL). The test-tube was capped and the reaction mixture was irradiated with LED light ( $\lambda = 400$  nm) while stirring for 12 h. The reaction mixture was then quenched with saturated solution of sodium hydrogen carbonate (3 mL) and extracted with ethyl acetate (3  $\times$  10 mL). The organic layer was collected, dried over anhydrous sodium sulfate, concentrated under reduced pressure, and the remaining material was purified by flash chromatography on silica gel (hexane/ethyl acetate 7 : 3 v/v) to give the sulfonamide product **4d** (38 mg, 41%) as a white solid.

m.p.: 148–150°C. – <sup>1</sup>H NMR (500 MHz, CDCl<sub>3</sub>): 7.42–7.23 (5 H, m), 4.47–4.03 (3 H, m), 2.20–2.09 (3 H, m), 2.03 (6 H, d, *J* = 3.0 Hz), 1.77–1.59 (6 H, m) ppm. – <sup>13</sup>C NMR (125 MHz, CDCl<sub>3</sub>): 138.1, 128.9, 127.9, 127.8, 61.3, 48.6, 36.0, 35.9, 28.3 ppm. – IR: 3054, 2985, 2865, 1265, 896, 737, 703 cm<sup>-1</sup>. – HRMS: calcd for C<sub>17</sub>H<sub>23</sub>NO<sub>2</sub>SNa: 328.1342, found 328.1343 [M+Na<sup>+</sup>].

### ***N*-(4-Fluorophenethyl)-4-oxo-4-phenylbutane-1-sulfonamide (5a)**

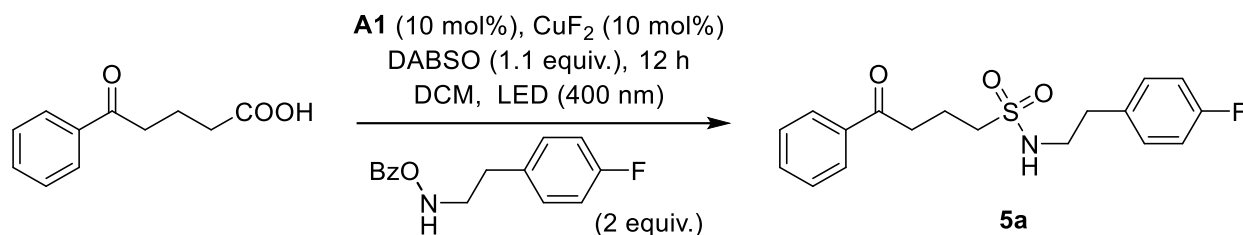

According to **GP1**, the reaction was carried out with 5-oxo-5-phenylpentanoic acid (58 mg, 0.3 mmol), DABSO (79 mg, 0.33 mmol, 1.1 equiv.), *O*-benzoyl-*N*-(4-fluorophenethyl)hydroxylamine (155 mg, 0.6 mmol, 2 equiv.), acridine catalyst **A1** (9 mg, 0.03 mmol, 10 mol%), copper difluoride (3 mg, 0.03 mmol, 10 mol%) in degassed dichloromethane (6 mL). The test-tube was capped and the reaction mixture was irradiated with LED light ( $\lambda = 400$  nm) while stirring for 12 h. The reaction mixture was then quenched with saturated solution of sodium hydrogen carbonate (3 mL) and extracted with ethyl acetate ( $3 \times 10$  mL). The organic layer was collected, dried over anhydrous sodium sulfate, concentrated under reduced pressure, and the remaining material was purified by flash chromatography on silica gel (hexane/ethyl acetate 2 : 3 v/v) to give the sulfonamide product **5a** (52 mg, 50%) as a white solid.

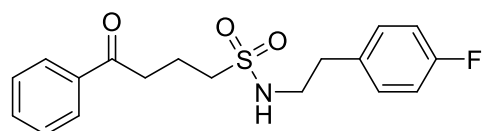

m.p.: 44–46°C. – <sup>1</sup>H NMR (500 MHz, CDCl<sub>3</sub>): 7.97–7.89 (2 H, m), 7.61–7.52 (1 H, m), 7.46 (2 H, dd, *J* = 8.4, 7.2 Hz), 7.22–7.13 (2 H, m), 7.02–6.93 (2 H, m), 4.53 (1 H, t, *J* = 6.3 Hz), 3.38 (2 H, q, *J* = 6.8 Hz), 3.15 (2 H, t, *J* = 6.7 Hz), 3.11–3.01 (2 H, m), 2.86 (2 H, t, *J* = 7.0 Hz), 2.17 (2 H, dq, *J* = 8.8, 6.8 Hz) ppm. – <sup>13</sup>C NMR (125 MHz, CDCl<sub>3</sub>): 198.8, 161.9 (d, *J* = 244.9 Hz), 136.6, 133.7 (d, *J* = 3.3 Hz), 133.5, 130.5 (d, *J* = 8.1 Hz), 128.8, 128.1, 115.7 (d, *J* = 21.4 Hz), 51.7, 44.6, 36.3, 36.0, 18.3 ppm. – <sup>19</sup>F NMR (470 MHz, CDCl<sub>3</sub>): -116.04 (tt, *J* = 9.2, 5.3 Hz). – IR: 3233, 2937, 1672, 1598, 1510, 1449, 1374, 1313, 1247, 1226, 1149, 1139, 1065 cm<sup>-1</sup>. – HRMS: calcd for C<sub>18</sub>H<sub>20</sub>FO<sub>3</sub>SN<sub>a</sub>: 372.1040, found 372.1041 [M+Na<sup>+</sup>].

### ***N*-(4-Fluorophenethyl)heptane-4-sulfonamide (5b)**

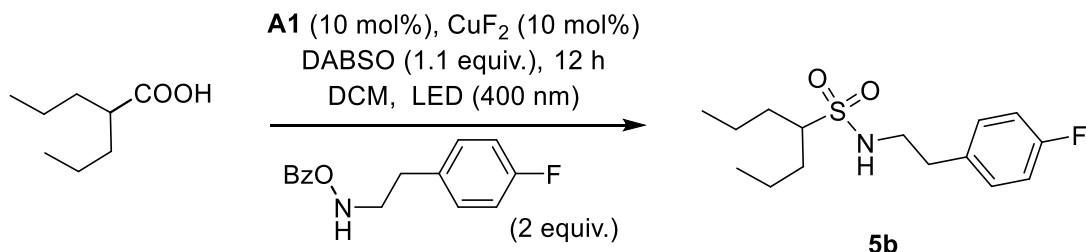

According to **GP1**, the reaction was carried out with 2-propylpentanoic acid (43 mg, 0.3 mmol), DABSO (79 mg, 0.33 mmol, 1.1 equiv.), *O*-benzoyl-*N*-(4-fluorophenethyl)hydroxylamine (155 mg, 0.6 mmol, 2 equiv.), acridine catalyst **A1** (9 mg, 0.03 mmol, 10 mol%), copper difluoride (3 mg, 0.03 mmol, 10 mol%) in degassed dichloromethane (6 mL). The test-tube was capped and the reaction mixture was irradiated with LED light ( $\lambda = 400$  nm) while stirring for 12 h. The reaction mixture was then quenched with saturated solution of sodium hydrogen carbonate (3 mL) and extracted with ethyl acetate (3  $\times$  10 mL). The organic layer was collected, dried over anhydrous sodium sulfate, concentrated under reduced pressure, and the remaining material was purified by flash chromatography on silica gel (hexane/ethyl acetate 7 : 3 v/v) to give the sulfonamide product **5b** (61 mg, 67%) as a yellow liquid.

<sup>1</sup>H NMR (500 MHz, CDCl<sub>3</sub>): 7.21–7.12 (2 H, m), 7.05–6.95 (2 H, m), 4.25 (1 H, t, *J* = 6.3 Hz), 3.34 (2 H, q, *J* = 6.8 Hz), 2.91–2.73 (3 H, m), 1.77 (2 H, dddd, *J* = 14.0, 10.6, 5.8, 4.9 Hz), 1.61–1.31 (6 H, m), 0.91 (6 H, t, *J* = 7.3 Hz) ppm. – <sup>13</sup>C NMR (125 MHz, CDCl<sub>3</sub>): 161.9 (d, *J* = 245.1 Hz), 133.8 (d, *J* = 3.5 Hz), 130.4 (d, *J* = 7.9 Hz), 115.7 (d, *J* = 21.4 Hz), 62.2, 45.0, 36.3, 31.1, 20.2, 14.2 ppm. – <sup>19</sup>F NMR (470 MHz, CDCl<sub>3</sub>): -116.10 (td, *J* = 8.6, 4.4 Hz). – IR: 3025, 2962, 2865, 1737, 1510, 1420, 1365, 1318, 1264, 1223, 1136, 1081, 895 cm<sup>-1</sup>. – HRMS: calcd for C<sub>15</sub>H<sub>25</sub>FO<sub>2</sub>S: 302.1585, found 302.1589 [M+H<sup>+</sup>].

### 4,4-Difluoro-*N*-(4-fluorophenethyl)cyclohexane-1-sulfonamide (**5c**)

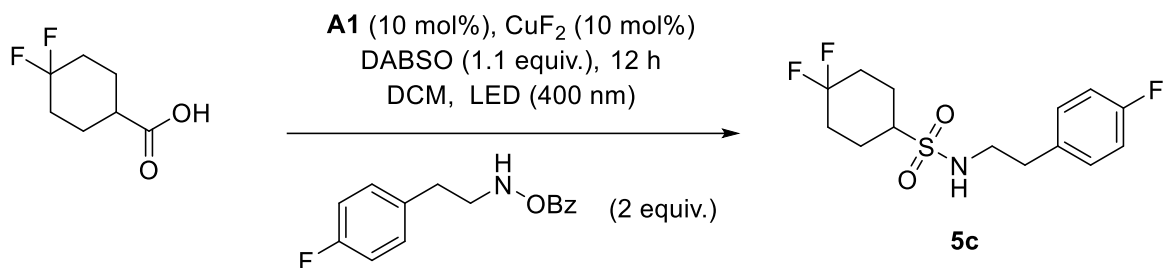

According to **GP1**, the reaction was carried out with 4,4-difluorocyclohexane-1-carboxylic acid (49 mg, 0.3 mmol), DABSO (79 mg, 0.33 mmol, 1.1 equiv.), *O*-benzoyl-*N*-(4-fluorophenethyl)hydroxylamine (156 mg, 0.6 mmol, 2 equiv.), acridine catalyst **A1** (9 mg, 0.03 mmol, 10 mol%), copper difluoride (3 mg, 0.03 mmol, 10 mol%), and degassed dichloromethane (6 mL) were added. The test-tube was capped and the reaction mixture was irradiated with LED light ( $\lambda = 400$  nm) while stirring for 12 h. The reaction mixture was then quenched with saturated solution of sodium hydrogen carbonate (3 mL) and extracted with ethyl acetate (3  $\times$  10 mL). The organic layer was collected, dried over anhydrous sodium sulfate, concentrated under reduced pressure, and the remaining material was purified by flash chromatography on silica gel (hexane/ ethyl acetate 3 : 1 v/v) to give the sulfone product **5c** (70 mg, 73%) as a colorless solid.

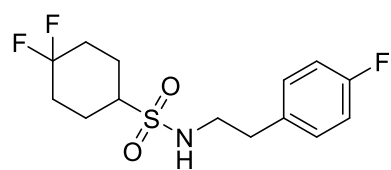

m.p.: 45–47 °C. – <sup>1</sup>H NMR (500 MHz, CDCl<sub>3</sub>): 7.22–7.14 (2 H, m), 7.05–6.95 (2 H, m), 4.39 (1 H, t, *J* = 6.3 Hz), 3.37 (2 H, q, *J* = 6.8 Hz), 2.90–2.74 (3 H, m), 2.20 (2 H, tdd, *J* = 10.8, 5.6, 3.0 Hz), 2.15–2.07 (2 H, m), 1.89–1.77 (2 H, m), 1.70 (2 H, dt, *J* = 31.2, 13.4, 3.9 Hz) ppm. – <sup>13</sup>C NMR (125 MHz, CDCl<sub>3</sub>) 162.0 (d, <sup>1</sup>*J*<sub>C-F</sub> = 245.3 Hz), 133.6 (d, <sup>4</sup>*J*<sub>C-F</sub> = 3.5 Hz), 130.5 (d, <sup>3</sup>*J*<sub>C-F</sub> = 8.1 Hz), 122.0 (dd, <sup>1</sup>*J*<sub>C-F</sub> = 242.9, 240.9 Hz), 115.7 (d, <sup>2</sup>*J*<sub>C-F</sub> = 21.4 Hz), 59.0, 45.1, 36.4, 32.3 (t, <sup>2</sup>*J*<sub>C-F</sub> = 25.1 Hz), 23.2 (d, <sup>3</sup>*J*<sub>C-F</sub> = 9.6 Hz) ppm. – <sup>19</sup>F NMR (470 MHz, CDCl<sub>3</sub>): –94.40 (d, *J* = 239.8 Hz), –102.00 (d, *J* = 238.7 Hz), –115.71 (q, *J* = 7.9, 7.2 Hz) ppm. – IR: 3281, 3089, 2967, 2934, 2857, 1601, 1509, 1452, 1311, 1269, 1221, 1141, 1081, 894, 834 cm<sup>–1</sup>. – HRMS: calcd for C<sub>14</sub>H<sub>18</sub>F<sub>3</sub>NNaO<sub>2</sub>S: 344.0903, found 344.0900 [M+Na<sup>+</sup>].

**N-(4-Fluorophenethyl)adamantane-1-sulfonamide (5d)**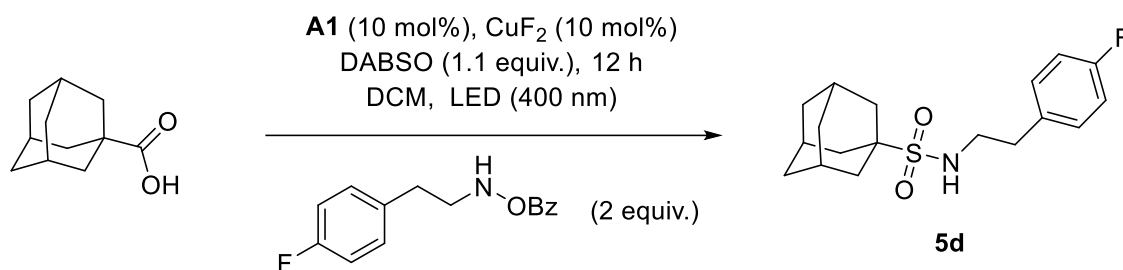

According to **GP1**, the reaction was carried out with adamantane-1-carboxylic acid (54 mg, 0.3 mmol), DABSO (79 mg, 0.33 mmol, 1.1 equiv.), *O*-benzoyl-*N*-(4-fluorophenethyl)hydroxylamine (156 mg, 0.6 mmol, 2 equiv.), acridine catalyst **A1** (9 mg, 0.03 mmol, 10 mol%), copper difluoride (3 mg, 0.03 mmol, 10 mol%), and degassed dichloromethane (6 mL) were added. The test-tube was capped and the reaction mixture was irradiated with LED light ( $\lambda = 400$  nm) while stirring for 12 h. The reaction mixture was then quenched with saturated solution of sodium hydrogen carbonate (3 mL) and extracted with ethyl acetate ( $3 \times 10$  mL). The organic layer was collected, dried over anhydrous sodium sulfate, concentrated under reduced pressure, and the remaining material was purified by flash chromatography on silica gel (hexane/ ethyl acetate 3 : 2 v/v) to give the sulfone product **5d** (53 mg, 52%) as a colorless solid.

m.p.: 65–67 °C. –  $^1\text{H}$  NMR (500 MHz,  $\text{CDCl}_3$ ): 7.20–7.13 (2 H, m), 7.03–6.96 (2 H, m), 4.06 (1 H, t,  $J = 6.2$  Hz), 3.37 (2 H, q,  $J = 6.8$  Hz), 2.83 (2 H, t,  $J = 7.0$  Hz), 2.13–2.07 (3 H, m), 1.94 (6 H, s), 1.70 (3 H, dt,  $J = 12.6, 2.9$  Hz), 1.62 (3 H, dq,  $J = 12.7, 2.1$  Hz) ppm. –  $^{13}\text{C}$  NMR (125 MHz,  $\text{CDCl}_3$ ): 161.7 (d,  $^1J_{\text{C-F}} = 245.0$  Hz), 134.0 (d,  $^4J_{\text{C-F}} = 3.5$  Hz), 130.5 (d,  $^3J_{\text{C-F}} = 8.0$  Hz), 115.6 (d,  $J_{\text{C-F}} = 21.4$  Hz), 61.2, 46.1, 37.0, 35.9, 35.8, 28.2 ppm. –  $^{19}\text{F}$  NMR (470 MHz,  $\text{CDCl}_3$ ): -116.13–-116.26 (m) ppm. – IR: 3271, 2910, 2851, 1598, 1508, 1440, 1417, 1375, 1287, 1215, 1165, 1142, 1102, 1080, 1052, 976, 909, 820, 796  $\text{cm}^{-1}$ . – HRMS: calcd for  $\text{C}_{18}\text{H}_{24}\text{FNNaO}_2\text{S}$ : 360.1404, found 360.1403 [ $\text{M}+\text{Na}^+$ ].

**5-(2,5-Dimethylphenoxy)-N-(4-fluorophenethyl)-2-methylpentane-2-sulfonamide (5e)**

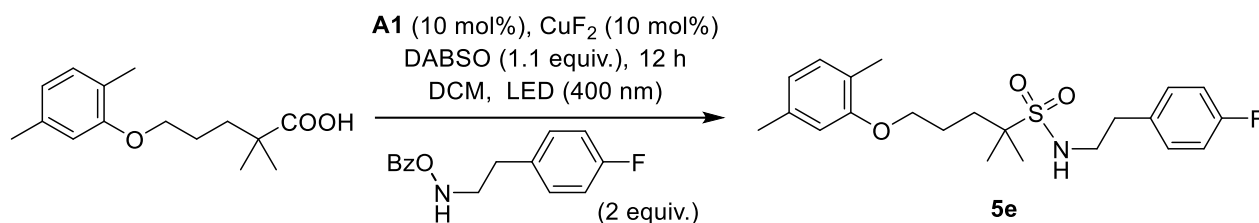

According to **GP1**, the reaction was carried out with 5-(2,5-dimethylphenoxy)-2,2-dimethylpentanoic acid (75 mg, 0.3 mmol), DABSO (79 mg, 0.33 mmol, 1.1 equiv.), *O*-benzoyl-*N*-(4-fluorophenethyl)hydroxylamine (155 mg, 0.6 mmol, 2 equiv.), acridine catalyst **A1** (9 mg, 0.03 mmol, 10 mol%), copper difluoride (3 mg, 0.03 mmol, 10 mol%) in degassed dichloromethane (6 mL). The test-tube was capped and the reaction mixture was irradiated with LED light ( $\lambda = 400$  nm) while stirring for 12 h. The reaction mixture was then quenched with saturated solution of sodium hydrogen carbonate (3 mL) and extracted with ethyl acetate ( $3 \times 10$  mL). The organic layer was collected, dried over anhydrous sodium sulfate, concentrated under reduced pressure, and the remaining material was purified by flash chromatography on silica gel (hexane/ethyl acetate 2 : 3 v/v) to give the sulfonamide product **5e** (75 mg, 61%) as a white solid.

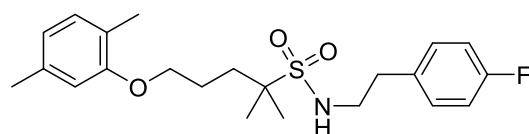

m.p.: 40–41°C. –  $^1\text{H}$  NMR (500 MHz,  $\text{CDCl}_3$ ): 7.20–7.13 (2 H, m), 7.04–6.96 (3 H, m), 6.70–6.64 (1 H, m), 6.61 (1 H, d,  $J = 1.5$  Hz), 3.94 (2 H, t,  $J = 5.6$

Hz), 3.86 (1 H, t,  $J = 6.3$  Hz), 3.41 (2 H, q,  $J = 6.7$  Hz), 2.85 (2 H, t,  $J = 6.9$  Hz), 2.31 (3 H, s), 2.16 (3 H, s), 1.97–1.81 (4 H, m), 1.35 (6 H, s) ppm. –  $^{13}\text{C}$  NMR (125 MHz,  $\text{CDCl}_3$ ): 162.0 (d,  $J = 245.2$  Hz), 156.9, 136.7, 133.7, 130.5 (d,  $J = 3.4$  Hz), 130.5, 123.6, 121.1, 115.8 (d,  $J = 21.1$  Hz), 112.1, 67.8, 63.0, 46.2, 37.0, 33.0, 24.5, 21.7, 21.5, 15.9 ppm. –  $^{19}\text{F}$  NMR (470 MHz,  $\text{CDCl}_3$ ): -116.05 (td,  $J = 8.6, 4.3$  Hz) ppm. – IR: 2956, 2924, 2873, 2859, 2216, 2062, 1462, 1381  $\text{cm}^{-1}$ . – HRMS: calcd for  $\text{C}_{22}\text{H}_{30}\text{FNO}_3\text{SNa}$ : 430.1823, found 430.1801 [ $\text{M} + \text{Na}^+$ ].

**Methyl (1*R*\*,2*S*\*)-2-(*N*-((*R*)-1-phenylethyl)sulfamoyl)cyclohexane-1-carboxylate (6a)**

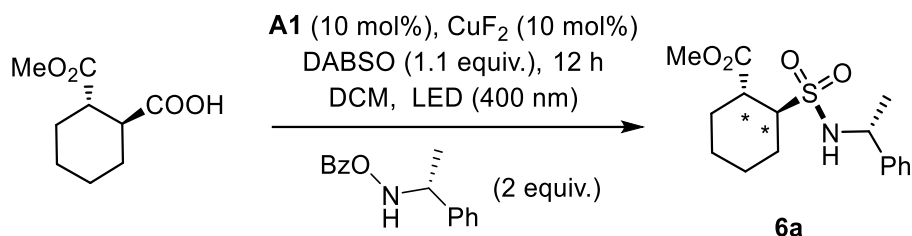

According to **GP1**, the reaction was carried out with (1*S*,2*S*)-2-(methoxycarbonyl)cyclohexane-1-carboxylic acid (56 mg, 0.3 mmol), DABSO (79 mg, 0.33 mmol, 1.1 equiv.), (*R*)-*O*-benzoyl-*N*-(1-phenylethyl)hydroxylamine (145 mg, 0.6 mmol, 2 equiv.), acridine catalyst **A1** (9 mg, 0.03 mmol, 10 mol%), copper difluoride (3 mg, 0.03 mmol, 10 mol%) in degassed dichloromethane (6 mL). The test-tube was capped and the reaction mixture was irradiated with LED light ( $\lambda = 400$  nm) while stirring for 12 h. The reaction mixture was then quenched with saturated solution of sodium hydrogen carbonate (3 mL) and extracted with ethyl acetate (3  $\times$  10 mL). The organic layer was collected, dried over anhydrous sodium sulfate, concentrated under reduced pressure, and the remaining material was purified by flash chromatography on silica gel (hexane/ethyl acetate 3 : 2 v/v) to give the inseparable diastomer sulfonamide products **6a** (85 mg, 87%, 1 : 1 ratio) as a yellow liquid.

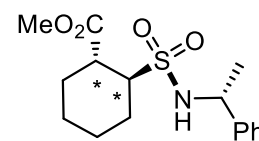  $[\alpha]_D^{23} = -100$  (*c* 0.25, chloroform).  $^1\text{H}$  NMR (500 MHz,  $\text{CDCl}_3$ ): 7.40–7.31 (4 H, m), 7.31–7.24 (1 H, m), 4.92 (1 H, t,  $J = 8.4$  Hz), 4.76–4.52 (1 H, m), 3.67 (3 H, d,  $J = 18.1$  Hz), 3.03 (1 H, dddd,  $J = 100.2, 11.9, 10.8, 4.1$  Hz), 2.71–2.42 (1 H, m), 2.15–1.58 (4 H, m), 1.55 (3 H, dd,  $J = 6.9, 5.6$  Hz), 1.51–1.30 (2 H, m), 1.22–0.90 (2 H, m) ppm.  $^{13}\text{C}$  NMR (125 MHz,  $\text{CDCl}_3$ ): 175.1, 174.8, 143.0, 128.9, 128.9, 128.9, 127.9, 127.8, 126.4, 126.3, 126.3, 62.8, 62.0, 54.1, 53.9, 52.2, 44.0, 43.6, 29.8, 29.8, 25.8, 25.5, 24.5, 24.4, 24.3, 24.2, 24.1 ppm. – IR: 2935, 2870, 1738, 1452, 1318, 1254, 1169, 1091, 1042, 880  $\text{cm}^{-1}$ . – HRMS: calcd for  $\text{C}_{16}\text{H}_{24}\text{NO}_4\text{S}$ : 326.1426, found 326.1426  $[\text{M}+\text{H}^+]$ .

### ***N*-((*R*)-1-Phenylethyl)adamantane-1-sulfonamide (**6b**)**

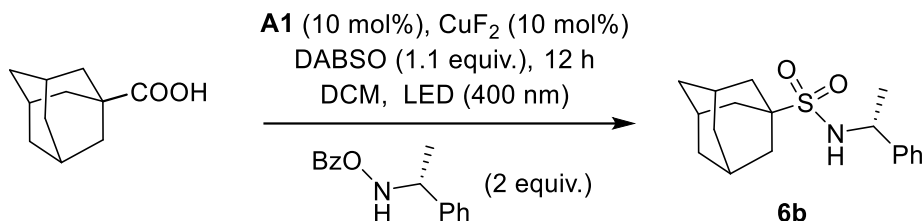

According to **GP1**, the reaction was carried out with adamantane-1-carboxylic acid (54 mg, 0.3 mmol), DABSO (79 mg, 0.33 mmol, 1.1 equiv.), (*R*)-*O*-benzoyl-*N*-(1-phenylethyl)hydroxylamine (145 mg, 0.6 mmol, 2 equiv.), acridine catalyst **A1** (9 mg, 0.03 mmol, 10 mol%), copper difluoride (3 mg, 0.03 mmol, 10 mol%) in degassed dichloromethane (6 mL). The test-tube was capped and the reaction mixture was irradiated with LED light ( $\lambda = 400 \text{ nm}$ ) while stirring for 12 h. The reaction mixture was then quenched with saturated solution of sodium hydrogen carbonate (3 mL) and extracted with ethyl acetate ( $3 \times 10 \text{ mL}$ ). The organic layer was collected, dried over anhydrous sodium sulfate, concentrated under reduced pressure, and the remaining material was purified by flash chromatography on silica gel (hexane/ethyl acetate 2 : 3 v/v) to give the sulfonamide product **6b** (81 mg, 85%) as a yellow solid.

m.p.: 78–80°C. –  $^1\text{H NMR}$  (500 MHz,  $\text{CDCl}_3$ ): 7.44–7.32 (4 H, m), 7.31–7.25 (1 H, m), 4.65 (1 H, dq,  $J = 9.0, 6.9 \text{ Hz}$ ), 4.38 (1 H, d,  $J = 8.9 \text{ Hz}$ ), 2.09 (3 H, p,  $J = 3.2 \text{ Hz}$ ), 2.01–1.89 (6 H, m), 1.69 (3 H, d,  $J = 12.8 \text{ Hz}$ ), 1.64–1.56 (6 H, m) ppm. –  $^{13}\text{C NMR}$  (125 MHz,  $\text{CDCl}_3$ ): 143.7, 128.7, 127.4, 125.9, 60.9, 54.2, 35.8, 35.6, 28.1, 25.5 ppm. – IR: 3028, 2971, 2907, 2850, 2678, 1603, 1453, 1433, 1298, 1147  $\text{cm}^{-1}$ . – HRMS: calcd for  $\text{C}_{18}\text{H}_{25}\text{NO}_2\text{SNa}$ : 342.1498, found 342.1497 [ $\text{M}+\text{Na}^+$ ].



***N,N*-Dibenzyl-4-(5-methylthiophen-2-yl)-4-oxobutane-1-sulfonamide (7a)**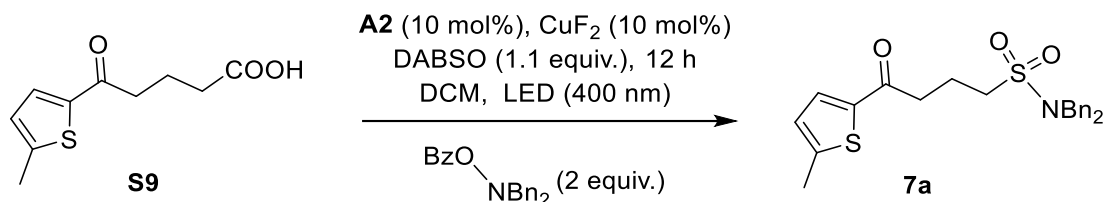

According to **GP1**, the reaction was carried out with acid **S9** (64 mg, 0.3 mmol), DABSO (79 mg, 0.33 mmol, 1.1 equiv.), *O*-benzoyl-*N,N*-dibenzylhydroxylamine (190 mg, 0.6 mmol, 2 equiv.), acridine catalyst **A1** (9 mg, 0.03 mmol, 10 mol%), copper difluoride (3 mg, 0.03 mmol, 10 mol%) in degassed dichloromethane (6 mL). The test-tube was capped and the reaction mixture was irradiated with LED light ( $\lambda = 400$  nm) while stirring for 12 h. The reaction mixture was then quenched with saturated solution of sodium hydrogen carbonate (3 mL) and extracted with ethyl acetate ( $3 \times 10$  mL). The organic layer was collected, dried over anhydrous sodium sulfate, concentrated under reduced pressure, and the remaining material was purified by flash chromatography on silica gel (hexane/ethyl acetate 2 : 3 v/v) to give the sulfonamide product **7a** (77 mg, 60%) as a white solid.

Chemical structure of **7a** is shown. Physical and spectral data: m.p.: 73–75°C. –  $^1\text{H}$  NMR (500 MHz,  $\text{CDCl}_3$ ): 7.56 (1 H, d,  $J = 3.7$  Hz), 7.41–7.27 (10 H, m), 6.82 (1 H, dd,  $J = 3.8, 1.2$  Hz), 4.37 (4 H, s), 3.04 (4 H, q,  $J = 7.3$  Hz), 2.55 (3 H, d,  $J = 1.0$  Hz), 2.32–2.15 (2 H, m) ppm. –  $^{13}\text{C}$  NMR (125 MHz,  $\text{CDCl}_3$ ): 191.3, 150.1, 141.7, 135.8, 132.9, 130.3, 129.3, 129.1, 128.8, 128.7, 128.6, 128.0, 127.0, 52.5, 50.3, 36.5, 18.6, 16.1 ppm. – IR: 3062, 2920, 2784, 2737, 2597, 1655, 1606, 1570, 1516, 1494, 1455, 1320, 1142  $\text{cm}^{-1}$ . – HRMS: calcd for  $\text{C}_{23}\text{H}_{25}\text{NO}_3\text{S}_2\text{Na}$ : 450.1168, found 450.1163  $[\text{M}+\text{Na}^+]$ .

***N,N*-Dibenzylcyclohexanesulfonamide (7b)**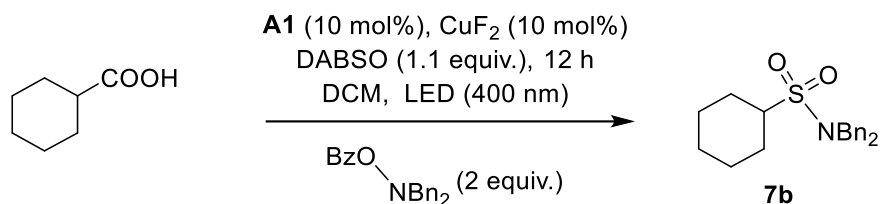

According to **GP1**, the reaction was carried out with cyclohexanecarboxylic acid (38 mg, 0.3 mmol), DABSO (79 mg, 0.33 mmol, 1.1 equiv.), *O*-benzoyl-*N,N*-dibenzylhydroxylamine (190 mg, 0.6 mmol, 2 equiv.), acridine catalyst **A1** (9 mg, 0.03 mmol, 10 mol%), copper difluoride (3 mg, 0.03 mmol, 10 mol%) in degassed dichloromethane (6 mL). The test-tube was capped and the reaction mixture was irradiated with LED light ( $\lambda = 400$  nm) while stirring for 12 h. The reaction mixture was then quenched with saturated solution of sodium hydrogen carbonate (3 mL) and extracted with ethyl acetate (3  $\times$  10 mL). The organic layer was collected, dried over anhydrous sodium sulfate, concentrated under reduced pressure, and the remaining material was purified by flash chromatography on silica gel (hexane/ethyl acetate 2 : 3 v/v) to give the sulfonamide product **7b** (69 mg, 67%) as a white solid.

m.p.: 85–87°C. – <sup>1</sup>H NMR (500 MHz, CDCl<sub>3</sub>): 7.49–7.08 (10 H, m), 4.36 (4 H, s), 2.78 (1 H, tt, *J* = 12.1, 3.4 Hz), 2.08 (2 H, dd, *J* = 12.4, 3.2 Hz), 1.85 (2 H, dt, *J* = 13.6, 3.7 Hz), 1.70–1.45 (3 H, m), 1.23 – 1.07 (3 H, m) ppm. – <sup>13</sup>C NMR (125 MHz, CDCl<sub>3</sub>): 136.3, 128.8, 128.0, 63.1, 50.9, 26.7, 25.4, 25.3 ppm. – IR: 3029, 2936, 2854, 2616, 1711, 1602, 1583, 1494, 1452, 1379, 1265, 1228, 1142, 1053 cm<sup>-1</sup>. – HRMS: calcd for C<sub>20</sub>H<sub>26</sub>NO<sub>2</sub>S: 344.1684, found 344.1683 [M+H<sup>+</sup>].

***N,N*-Dibenzyltetrahydro-2*H*-pyran-4-sulfonamide (7c)**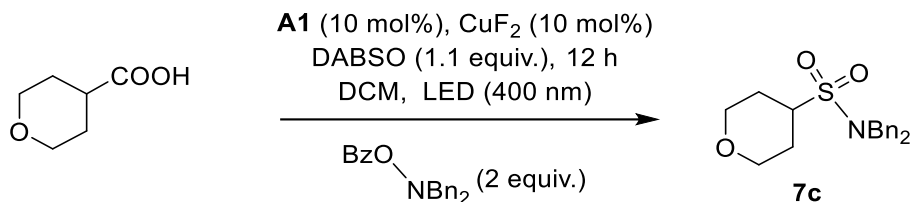

According to **GP1**, the reaction was carried out with tetrahydro-2*H*-pyran-4-carboxylic acid (39 mg, 0.3 mmol), DABSO (79 mg, 0.33 mmol, 1.1 equiv.), *O*-benzoyl-*N,N*-dibenzylhydroxylamine (190 mg, 0.6 mmol, 2 equiv.), acridine catalyst **A1** (9 mg, 0.03 mmol, 10 mol%), copper difluoride (3 mg, 0.03 mmol, 10 mol%) in degassed dichloromethane (6 mL). The test-tube was capped and the reaction mixture was irradiated with LED light ( $\lambda = 400 \text{ nm}$ ) while stirring for 12 h. The reaction mixture was then quenched with saturated solution of sodium hydrogen carbonate (3 mL) and extracted with ethyl acetate ( $3 \times 10 \text{ mL}$ ). The organic layer was collected, dried over anhydrous sodium sulfate, concentrated under reduced pressure, and the remaining material was purified by flash chromatography on silica gel (hexane/ethyl acetate 2 : 3 v/v) to give the sulfonamide product **7c** (59 mg, 57%) as a white solid.

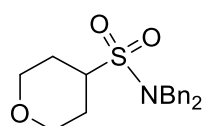
 m.p.: 89–90°C. –  $^1\text{H NMR}$  (500 MHz,  $\text{CDCl}_3$ ): 7.43–7.24 (10 H, m), 4.40 (4 H, s), 4.06 (2 H, ddd,  $J = 11.8, 4.5, 1.9 \text{ Hz}$ ), 3.24 (2 H, td,  $J = 11.6, 2.5 \text{ Hz}$ ), 2.96 (1 H, tt,  $J = 11.6, 4.2 \text{ Hz}$ ), 2.02–1.83 (4 H, m) ppm. –  $^{13}\text{C NMR}$  (125 MHz,  $\text{CDCl}_3$ ): 136.1, 128.9, 128.8, 128.2, 66.8, 60.2, 51.0, 26.9 ppm. – IR: 3053, 2951, 2310, 2174, 1468, 1426, 1366, 1264, 1123, 894  $\text{cm}^{-1}$ . – HRMS: calcd for  $\text{C}_{19}\text{H}_{24}\text{NO}_3\text{S}$ : 346.1477, found 346.1475  $[\text{M}+\text{H}^+]$ .

***N*-(*p*-Tolyl)cyclohexanesulfonamide (**8a**)**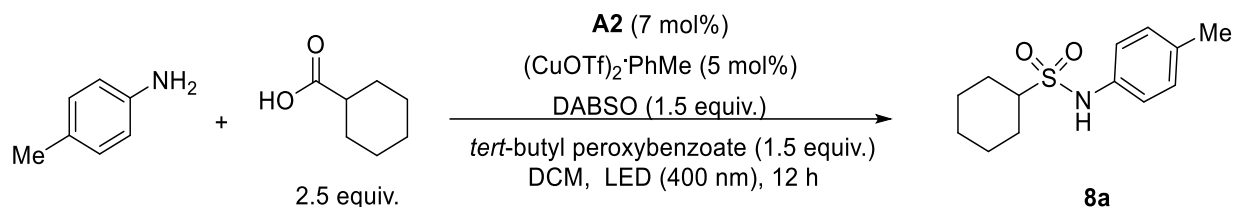

According to **GP2**, the reaction was carried out with *p*-toluidine (32 mg, 0.3 mmol), cyclohexanecarboxylic acid (96 mg, 0.75 mmol, 2.5 equiv.), DABSO (108 mg, 0.45 mmol, 1.5 equiv.), acridine **A2** (6 mg, 0.02 mmol, 7 mol%), *tert*-butyl peroxybenzoate (87 mg, 0.45 mmol, 1.5 equiv.), (CuOTf)<sub>2</sub>·PhMe (7 mg, 0.015 mmol, 5 mol%) in degassed dichloromethane (3 mL). The test-tube was capped and the reaction mixture was irradiated with LED light ( $\lambda = 400$  nm) while stirring for 12 h. The reaction mixture was then quenched with saturated solution of sodium hydrogen carbonate (3 mL), extracted with ethyl acetate (3 × 10 mL). The organic layer was collected, dried over anhydrous sodium sulfate, concentrated under reduced pressure, and the remaining material was purified by flash chromatography on silica gel (hexane/ ethyl acetate 3 : 2 v/v) to give the sulfonamide **8a** (60 mg, 79%) as a yellow oil.

<sup>1</sup>H NMR (500 MHz, CDCl<sub>3</sub>): 7.03 (2 H, dd, *J* = 7.0, 5.3 Hz), 6.97–6.91 (2 H, m), 2.90 (1 H, tt, *J* = 11.3, 3.8 Hz), 2.29 (3 H, s), 2.20–2.12 (1 H, m), 2.10–2.00 (1 H, m), 1.94–1.79 (2 H, m), 1.73–1.62 (1 H, m), 1.59–1.21 (5 H, m) ppm. – <sup>13</sup>C NMR (125 MHz, CDCl<sub>3</sub>): 139.4, 132.3, 129.9, 118.6, 62.7, 26.6, 26.4, 25.6, 25.2, 25.1, 20.7 ppm. – IR: 3455, 3015, 2969, 2945, 2887, 1783, 1693, 1517, 1424, 1366, 1228, 1216, 1018, 908, 732 cm<sup>–1</sup>. – HRMS: calcd for C<sub>13</sub>H<sub>20</sub>NO<sub>2</sub>S: 254.1209, found 254.1203 [M+H<sup>+</sup>].

### ***N*-(3,5-Dimethylphenyl)cyclohexanesulfonamide (8b)**

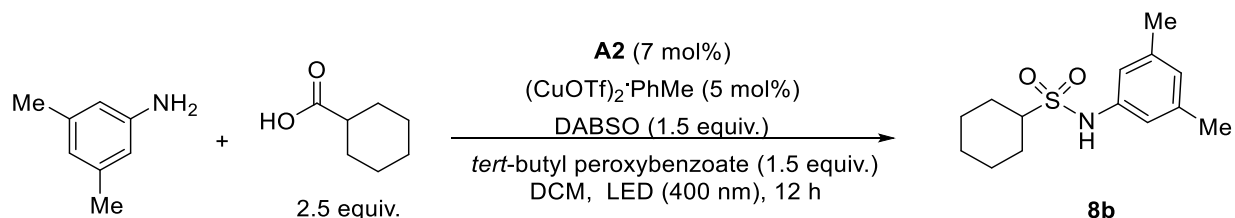

According to **GP2**, the reaction was carried out with 3,5-dimethylaniline (36 mg, 0.3 mmol), cyclohexanecarboxylic acid (96 mg, 0.75 mmol, 2.5 equiv.), DABSO (108 mg, 0.45 mmol, 1.5 equiv.), acridine **A2** (6 mg, 0.02 mmol, 7 mol%), *tert*-butyl peroxybenzoate (87 mg, 0.45 mmol, 1.5 equiv.), (CuOTf)<sub>2</sub>•PhMe (7 mg, 0.015 mmol, 5 mol%) in degassed dichloromethane (3 mL). The test-tube was capped and the reaction mixture was irradiated with LED light ( $\lambda = 400$  nm) while stirring for 12 h. The reaction mixture was then quenched with saturated solution of sodium hydrogen carbonate (3 mL), extracted with ethyl acetate (3 × 10 mL). The organic layer was collected, dried over anhydrous sodium sulfate, concentrated under reduced pressure, and the remaining material was purified by flash chromatography on silica gel (hexane/ ethyl acetate 3 : 2 v/v) to give the sulfonamide **8b** (65 mg, 81%) as a yellow oil.

**Gram scale for compound 13b:** According to **GP2**, the reaction was carried out in two parallel test tubes with the same amount of starting materials: 3,5-dimethylaniline (0.61 g, 5 mmol), cyclohexanecarboxylic acid (1.60 g, 12.5 mmol, 2.5 equiv.), DABSO (1.80 g, 7.5 mmol, 1.5 equiv.), acridine **A2** (104 mg, 0.35 mmol, 7 mol%), *tert*-butyl peroxybenzoate (1.46 g, 7.5 mmol, 1.5 equiv.), (CuOTf)<sub>2</sub>•PhMe (129.3 mg, 0.25 mmol, 5 mol%) in degassed dichloromethane (30 mL). The test-tube was capped and the reaction mixture was irradiated with LED light ( $\lambda = 400$  nm) while stirring for 16 h. The reaction mixtures were combined and then quenched with saturated solution of sodium hydrogen carbonate (30 mL), extracted with ethyl acetate (3 × 50 mL). The organic layer was collected, dried over anhydrous sodium sulfate, concentrated under reduced pressure, and the remaining

material was purified by flash chromatography on silica gel (hexane/ ethyl acetate 3 : 2 v/v) to give the sulfonamide **8b** (1.73 g, 65%) as a yellow oil.

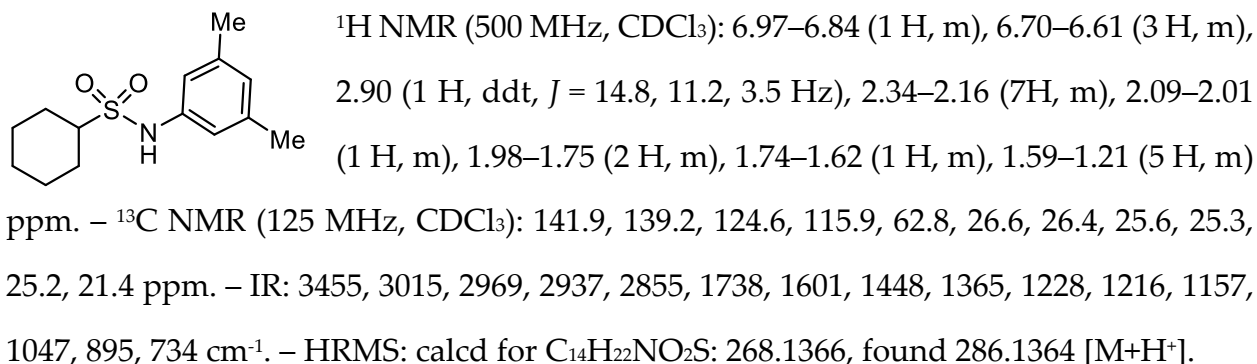

### N-(3,4,5-Trimethylphenyl)cyclohexanesulfonamide (**8c**)

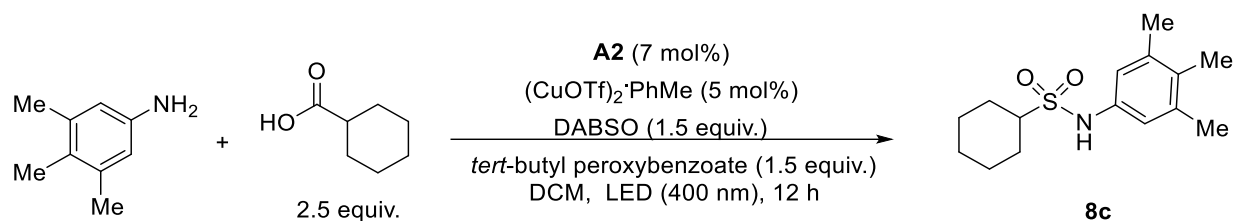

According to **GP2**, the reaction was carried out with 3,4,5-trimethylaniline (41 mg, 0.3 mmol), cyclohexanecarboxylic acid (96 mg, 0.75 mmol, 2.5 equiv.), DABSO (108 mg, 0.45 mmol, 1.5 equiv.), acridine **A2** (6 mg, 0.02 mmol, 7 mol%), *tert*-butyl peroxybenzoate (87 mg, 0.45 mmol, 1.5 equiv.), (CuOTf)<sub>2</sub>·PhMe (7 mg, 0.015 mmol, 5 mol%) in degassed dichloromethane (3 mL). The test-tube was capped and the reaction mixture was irradiated with LED light ( $\lambda$  = 400 nm) while stirring for 12 h. The reaction mixture was then quenched with saturated solution of sodium hydrogen carbonate (3 mL), extracted with ethyl acetate (3 × 10 mL). The organic layer was collected, dried over anhydrous sodium sulfate, concentrated under reduced pressure, and the remaining material was purified by flash chromatography on silica gel (hexane/ ethyl acetate 3 : 2 v/v) to give the sulfonamide **8c** (58 mg, 69%) as a yellow oil.

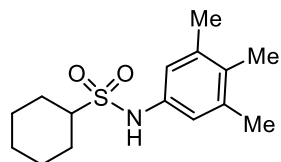

$^1\text{H}$  NMR (300 MHz,  $\text{CDCl}_3$ ): 6.69 (2 H, s), 6.36 (1 H, s), 2.81 (1 H, tt,  $J$  = 11.2, 3.7 Hz), 2.20–2.02 (11 H, m), 1.97–1.61 (3 H, m), 1.61–1.18 (5 H, m) ppm. –  $^{13}\text{C}$  NMR (125 MHz,  $\text{CDCl}_3$ ): 138.8, 137.6, 129.9, 118.1, 62.9, 26.5, 26.3, 25.7, 25.3, 25.0, 20.7, 14.8 ppm. – IR: 3454, 3015, 2969, 2928, 2853, 1738, 1485, 1448, 1365, 1227, 1216, 1162, 1047, 995, 894, 767  $\text{cm}^{-1}$ . – HRMS: calcd for  $\text{C}_{15}\text{H}_{23}\text{NO}_2\text{S}$ : 281.1450, found 281.1445 [ $\text{M}^+$ ].

### N-(4-Methoxyphenyl)cyclohexanesulfonamide (**8d**)

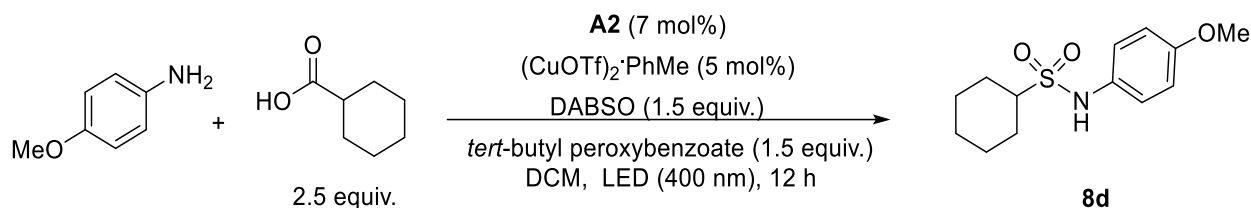

According to **GP2**, the reaction was carried out with 3,4,5-trimethylaniline (41 mg, 0.3 mmol), cyclohexanecarboxylic acid (96 mg, 0.75 mmol, 2.5 equiv.), DABSO (108 mg, 0.45 mmol, 1.5 equiv.), acridine **A2** (6 mg, 0.02 mmol, 7 mol%), *tert*-butyl peroxybenzoate (87 mg, 0.45 mmol, 1.5 equiv.),  $(\text{CuOTf})_2\cdot\text{PhMe}$  (7 mg, 0.015 mmol, 5 mol%) in degassed dichloromethane (3 mL). The test-tube was capped and the reaction mixture was irradiated with LED light ( $\lambda$  = 400 nm) while stirring for 12 h. The reaction mixture was then quenched with saturated solution of sodium hydrogen carbonate (3 mL), extracted with ethyl acetate ( $3 \times 10$  mL). The organic layer was collected, dried over anhydrous sodium sulfate, concentrated under reduced pressure, and the remaining material was purified by flash chromatography on silica gel (hexane/ ethyl acetate 3 : 2 v/v) to give the sulfonamide **8d** (53 mg, 66%) as a yellow oil.

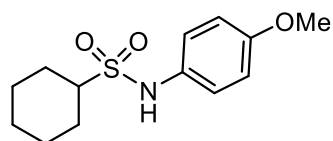

$^1\text{H}$  NMR (300 MHz,  $\text{CDCl}_3$ ): 7.03–6.93 (2 H, m), 6.83–6.73 (2 H, m), 6.38 (1 H, brs), 3.75 (3 H, s), 2.79 (1 H, tt,  $J$  = 11.4, 3.8 Hz), 2.15–2.02 (2 H, m), 1.93–1.76 (2 H, m), 1.67 (1 H, dd,  $J$  = 11.2, 4.4

Hz), 1.57–1.20 (5 H, m) ppm. –  $^{13}\text{C}$  NMR (125 MHz,  $\text{CDCl}_3$ ): 156.3, 134.7, 121.6, 114.7, 62.7, 55.7, 26.4, 26.4, 25.7, 25.3, 25.2 ppm. – IR: 3452, 3009, 2980, 2937, 2867, 1762, 1622, 1504, 1442, 1352, 1214, 1120, 912  $\text{cm}^{-1}$ . – HRMS: calcd for  $\text{C}_{13}\text{H}_{19}\text{NO}_3\text{S}$ : 269.1086, found 269.1490  $[\text{M}+\text{H}^+]$ .

### N-(2-Methoxyphenyl)cyclohexanesulfonamide (**8e**)

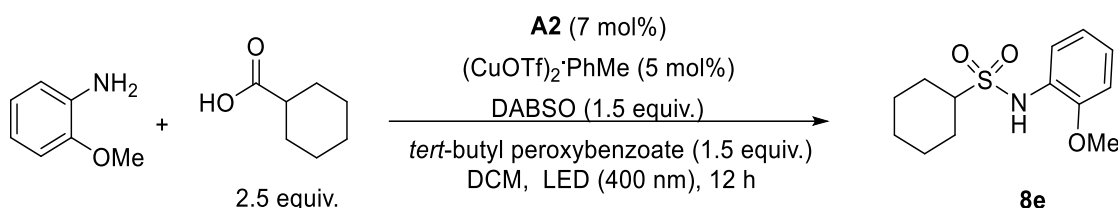

According to **GP2**, the reaction was carried out with 2-methoxyaniline (37 mg, 0.3 mmol), cyclohexanecarboxylic acid (96 mg, 0.75 mmol, 2.5 equiv.), DABSO (108 mg, 0.45 mmol, 1.5 equiv.), acridine **A2** (6 mg, 0.02 mmol, 7 mol%), *tert*-butyl peroxybenzoate (87 mg, 0.45 mmol, 1.5 equiv.),  $(\text{CuOTf})_2\cdot\text{PhMe}$  (7 mg, 0.015 mmol, 5 mol%) in degassed dichloromethane (3 mL). The test-tube was capped and the reaction mixture was irradiated with LED light ( $\lambda = 400$  nm) while stirring for 12 h. The reaction mixture was then quenched with saturated solution of sodium hydrogen carbonate (3 mL), extracted with ethyl acetate ( $3 \times 10$  mL). The organic layer was collected, dried over anhydrous sodium sulfate, concentrated under reduced pressure, and the remaining material was purified by flash chromatography on silica gel (hexane/ ethyl acetate 3 : 2 v/v) to give the sulfonamide **8e** (57 mg, 71%) as a yellow oil.

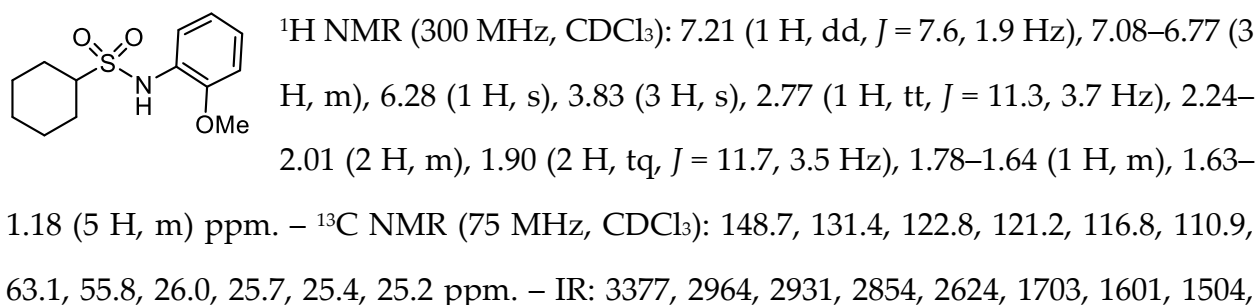



1466, 1453, 1328, 1293, 1266, 1223, 1160, 1128, 1046, 1027, 995, 760  $\text{cm}^{-1}$ . – HRMS: calcd for  $\text{C}_{13}\text{H}_{19}\text{NO}_3\text{S}$ : 269.1086, found 269.1082  $[\text{M}^+]$ .

### ***N*-(4-(Trifluoromethoxy)phenyl)cyclohexanesulfonamide (8f)**

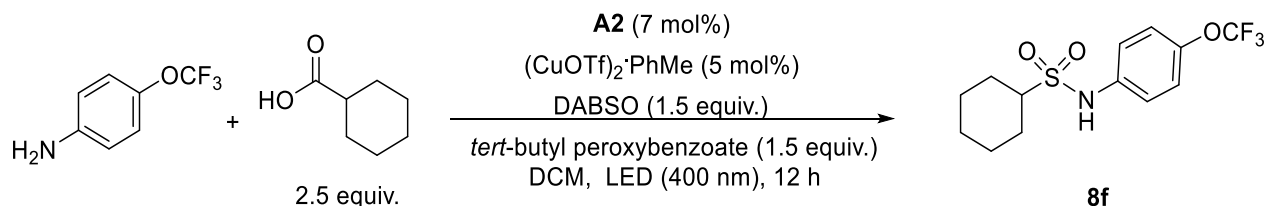

According to **GP2**, the reaction was carried out with 4-(trifluoromethoxy)aniline (53 mg, 0.3 mmol), cyclohexanecarboxylic acid (96 mg, 0.75 mmol, 2.5 equiv.), DABSO (108 mg, 0.45 mmol, 1.5 equiv.), acridine **A2** (6 mg, 0.02 mmol, 7 mol%), *tert*-butyl peroxybenzoate (87 mg, 0.45 mmol, 1.5 equiv.),  $(\text{CuOTf})_2\cdot\text{PhMe}$  (7 mg, 0.015 mmol, 5 mol%) in degassed dichloromethane (3 mL). The test-tube was capped and the reaction mixture was irradiated with LED light ( $\lambda = 400 \text{ nm}$ ) while stirring for 12 h. The reaction mixture was then quenched with saturated solution of sodium hydrogen carbonate (3 mL), extracted with ethyl acetate ( $3 \times 10 \text{ mL}$ ). The organic layer was collected, dried over anhydrous sodium sulfate, concentrated under reduced pressure, and the remaining material was purified by flash chromatography on silica gel (hexane/ ethyl acetate 3 : 2 v/v) to give the sulfonamide **8f** (52 mg, 54%) as a yellow oil.

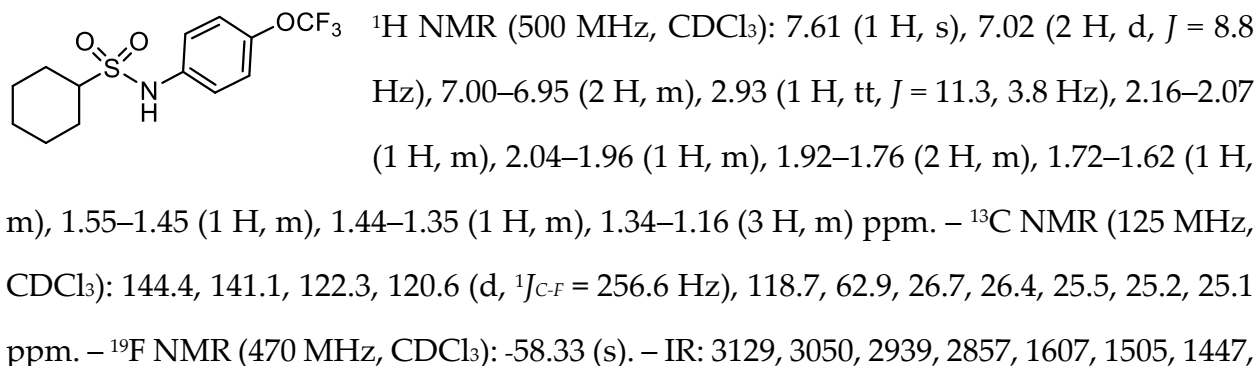

1254, 1220, 1159, 1036, 883, 842, 723  $\text{cm}^{-1}$ . – HRMS: calcd for  $\text{C}_{13}\text{H}_{17}\text{F}_3\text{NO}_3\text{S}$ : 324.0876, found 324.0855  $[\text{M}+\text{H}^+]$ .

### N-(3-(Methylthio)phenyl)cyclohexanesulfonamide (8g)

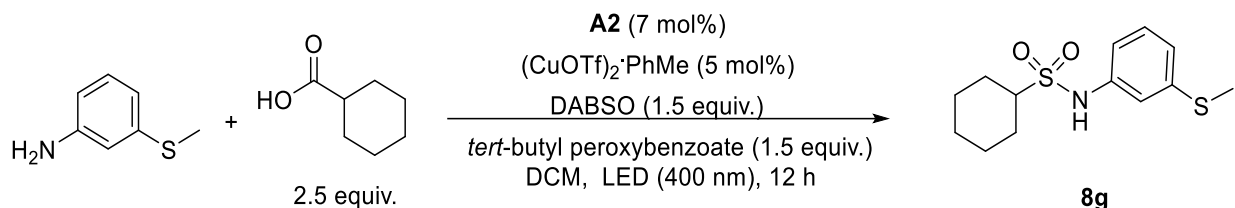

According to **GP2**, the reaction was carried out with 3-(methylthio)aniline (42 mg, 0.3 mmol), cyclohexanecarboxylic acid (96 mg, 0.75 mmol, 2.5 equiv.), DABSO (108 mg, 0.45 mmol, 1.5 equiv.), acridine **A2** (6 mg, 0.02 mmol, 7 mol%), *tert*-butyl peroxybenzoate (87 mg, 0.45 mmol, 1.5 equiv.),  $(\text{CuOTf})_2\cdot\text{PhMe}$  (7 mg, 0.015 mmol, 5 mol%) in degassed dichloromethane (3 mL). The test-tube was capped and the reaction mixture was irradiated with LED light ( $\lambda = 400 \text{ nm}$ ) while stirring for 12 h. The reaction mixture was then quenched with saturated solution of sodium hydrogen carbonate (3 mL), extracted with ethyl acetate ( $3 \times 10 \text{ mL}$ ). The organic layer was collected, dried over anhydrous sodium sulfate, concentrated under reduced pressure, and the remaining material was purified by flash chromatography on silica gel (hexane/ ethyl acetate 3 : 2 v/v) to give the sulfonamide **8g** (51 mg, 60%) as a yellow oil.

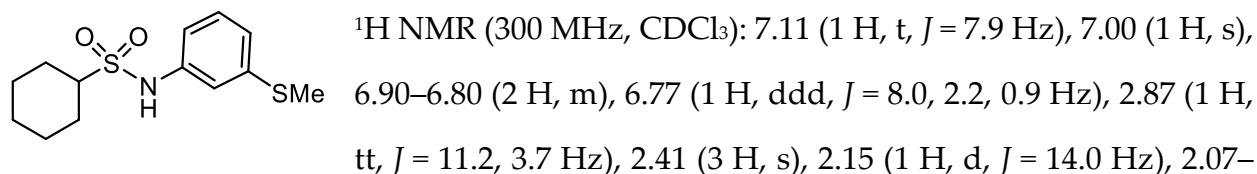

1.97 (1 H, m), 1.85 (2 H, ddd,  $J = 15.7, 6.4, 3.2 \text{ Hz}$ ), 1.58–1.14 (6 H, m) ppm. –  $^{13}\text{C NMR}$  (75 MHz,  $\text{CDCl}_3$ ): 142.7, 140.1, 129.7, 120.7, 115.6, 114.5, 63.0, 26.6, 26.3, 25.6, 25.25, 25.15, 15.6 ppm. – IR: 3061, 2995, 2919, 2857, 1709, 1592, 1499, 1382, 1266, 1222, 1149, 1046, 911, 859, 734, 703  $\text{cm}^{-1}$ . – HRMS: calcd for  $\text{C}_{13}\text{H}_{20}\text{NO}_2\text{S}_2$ : 286.0930, found 286.0929  $[\text{M}+\text{H}^+]$ .

## Ethyl 2-(4-(cyclohexanesulfonamido)phenyl)acetate (**8h**)

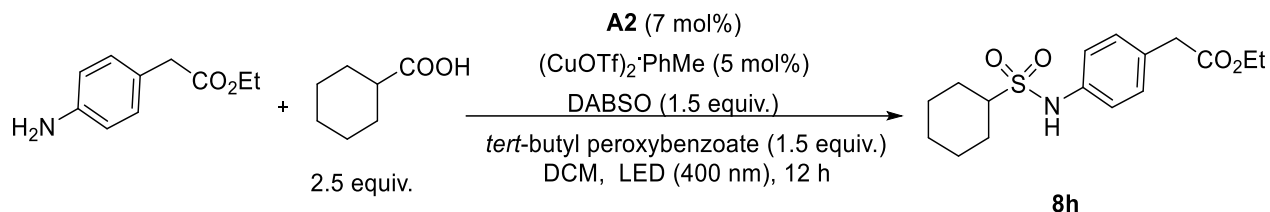

According to **GP2**, the reaction was carried out with ethyl 2-(4-aminophenyl)acetate (54 mg, 0.3 mmol), cyclohexanecarboxylic acid (96 mg, 0.75 mmol, 2.5 equiv.), DABSO (108 mg, 0.45 mmol, 1.5 equiv.), acridine **A2** (6 mg, 0.02 mmol, 7 mol%), *tert*-butyl peroxybenzoate (87 mg, 0.45 mmol, 1.5 equiv.), ( $\text{CuOTf}$ )<sub>2</sub>•PhMe (7 mg, 0.015 mmol, 5 mol%) in degassed dichloromethane (3 mL). The test-tube was capped and the reaction mixture was irradiated with LED light ( $\lambda = 400$  nm) while stirring for 12 h. The reaction mixture was then quenched with saturated solution of sodium hydrogen carbonate (3 mL), extracted with ethyl acetate (3 × 10 mL). The organic layer was collected, dried over anhydrous sodium sulfate, concentrated under reduced pressure, and the remaining material was purified by flash chromatography on silica gel (hexane/ ethyl acetate 2 : 3 v/v) to give the sulfonamide product **8h** (50 mg, 51%) as a yellow liquid.

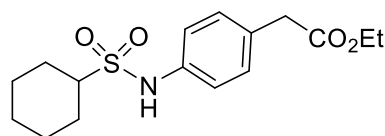

<sup>1</sup>H NMR (500 MHz, CDCl<sub>3</sub>): 7.18–7.10 (2 H, m), 7.02–6.92 (2 H, m), 6.70 (1 H, s), 4.13 (2 H, q, *J* = 7.1 Hz), 3.52 (2 H, s), 2.83 (1 H, tt, *J* = 11.2, 3.7 Hz), 2.24–1.12 (13 H, m) ppm. – <sup>13</sup>C NMR

(125 MHz, CDCl<sub>3</sub>): 171.8, 141.1, 130.2, 128.4, 118.2, 62.7, 60.9, 40.7, 26.6, 26.3, 25.5, 25.2, 25.0, 14.2 ppm. – IR: 2979, 2932, 2854, 2630, 1732, 1614, 1514, 1450, 1368, 1226, 1150, 1031 cm<sup>-1</sup>. – HRMS: calcd for C<sub>16</sub>H<sub>23</sub>NO<sub>4</sub>SN<sub>a</sub>: 348.1240, found 348.1237 [M+Na<sup>+</sup>].

### ***N*-Methyl-*N*-(*p*-tolyl)cyclohexanesulfonamide (**8i**)**

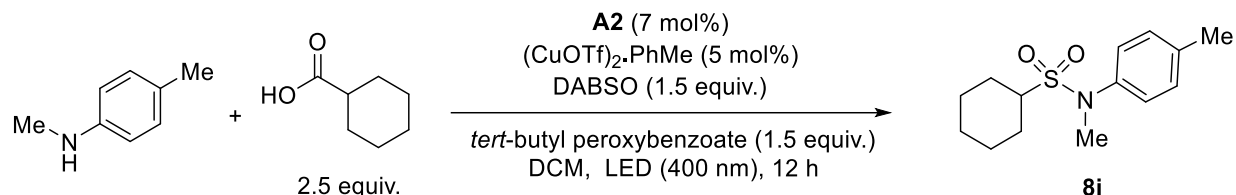

According to **GP2**, the reaction was carried out with *N*,4-dimethylaniline (36 mg, 0.3 mmol), cyclohexanecarboxylic acid (96 mg, 0.75 mmol, 2.5 equiv.), DABSO (108 mg, 0.45 mmol, 1.5 equiv.), acridine **A2** (6 mg, 0.02 mmol, 7 mol%), *tert*-butyl peroxybenzoate (87 mg, 0.45 mmol, 1.5 equiv.),  $(\text{CuOTf})_2\cdot\text{PhMe}$  (7 mg, 0.015 mmol, 5 mol%) in degassed dichloromethane (3 mL). The test-tube was capped and the reaction mixture was irradiated with LED light ( $\lambda = 400 \text{ nm}$ ) while stirring for 12 h. The reaction mixture was then quenched with saturated solution of sodium hydrogen carbonate (3 mL), extracted with ethyl acetate ( $3 \times 10 \text{ mL}$ ). The organic layer was collected, dried over anhydrous sodium sulfate, concentrated under reduced pressure, and the remaining material was purified by flash chromatography on silica gel (hexane/ ethyl acetate 3 : 2 v/v) to give the sulfonamide **8i** (50 mg, 63%) as a brown solid.

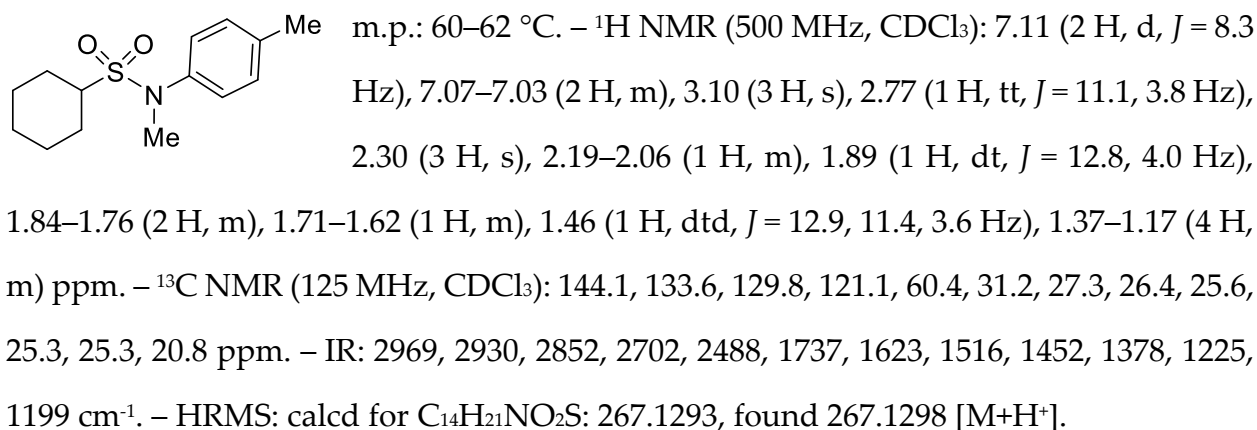

### N-(4-Fluoro-2-methylphenyl)cyclohexanesulfonamide (**8j**)

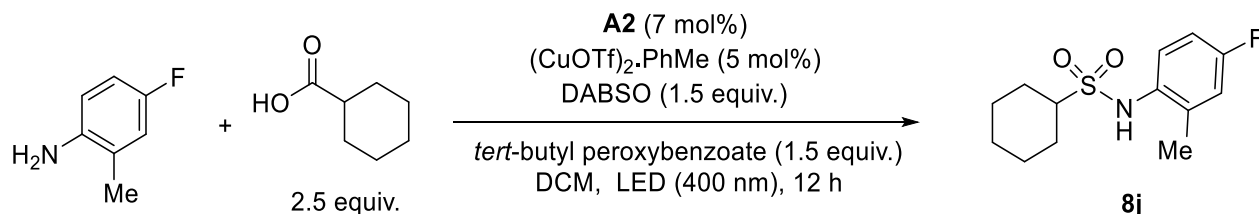

According to **GP2**, the reaction was carried out with 4-fluoro-2-methylaniline (38 mg, 0.3 mmol), cyclohexanecarboxylic acid (96 mg, 0.75 mmol, 2.5 equiv.), DABSO (108 mg, 0.45 mmol, 1.5 equiv.), acridine **A2** (6 mg, 0.02 mmol, 7 mol%), *tert*-butyl peroxybenzoate (87 mg, 0.45 mmol, 1.5 equiv.), (CuOTf)<sub>2</sub>·PhMe (7 mg, 0.015 mmol, 5 mol%) in degassed dichloromethane (3 mL). The test-tube was capped and the reaction mixture was irradiated with LED light ( $\lambda = 400$  nm) while stirring for 12 h. The reaction mixture was then quenched with saturated solution of sodium hydrogen carbonate (3 mL), extracted with ethyl acetate (3 × 10 mL). The organic layer was collected, dried over anhydrous sodium sulfate, concentrated under reduced pressure, and the remaining material was purified by flash chromatography on silica gel (hexane/ ethyl acetate 3 : 2 v/v) to give the sulfonamide **8j** (43 mg, 53%) as a yellow oil.

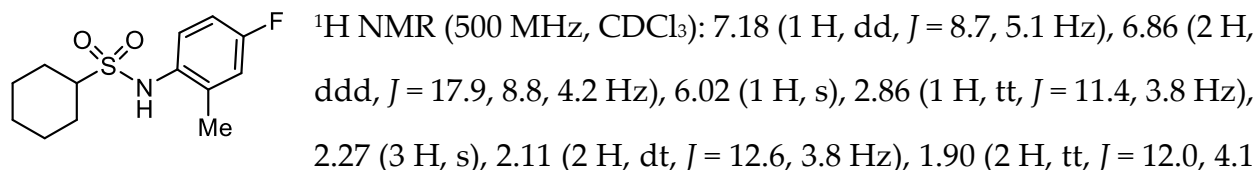

– <sup>13</sup>C NMR (125 MHz, CDCl<sub>3</sub>): 159.6 (d,  $^1J_{C-F} = 242.9$  Hz), 135.8, 132.0 (d,  $^3J_{C-F} = 8.0$  Hz), 122.6 (d,  $^3J_{C-F} = 8.4$  Hz), 117.5 (d,  $^2J_{C-F} = 22.7$  Hz), 113.5 (d,  $^2J_{C-F} = 22.1$  Hz), 63.2, 26.5, 26.4, 25.6, 25.4, 25.2, 18.3 ppm. – <sup>19</sup>F NMR (470 MHz, CDCl<sub>3</sub>): -119.34 (m). – IR: 3045, 2938, 2855, 2642, 1648, 1601, 1551, 1501, 1443, 1322, 1273, 1157, 1128, 1049, 994, 955, 811, 722 cm<sup>-1</sup>. – HRMS: calcd for C<sub>13</sub>H<sub>18</sub>FN<sub>2</sub>O<sub>2</sub>S: 271.1042, found 271.1040 [M<sup>+</sup>].

## 1-(Cyclohexylsulfonyl)indoline (8k)

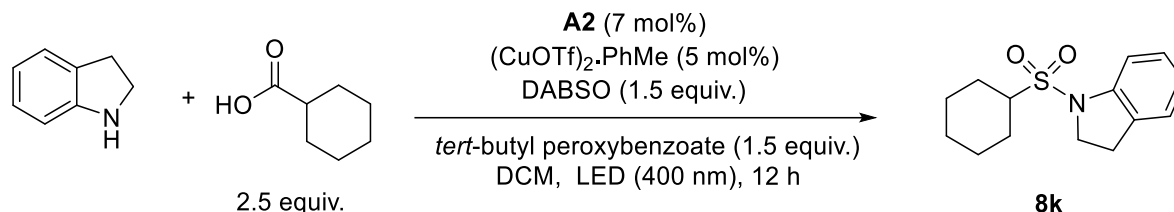

According to **GP2**, the reaction was carried out with indoline (36 mg, 0.3 mmol), cyclohexanecarboxylic acid (96 mg, 0.75 mmol, 2.5 equiv.), DABSO (108 mg, 0.45 mmol, 1.5 equiv.), acridine **A2** (6 mg, 0.02 mmol, 7 mol%), *tert*-butyl peroxybenzoate (87 mg, 0.45 mmol, 1.5 equiv.), (CuOTf)<sub>2</sub>·PhMe (7 mg, 0.015 mmol, 5 mol%) in degassed dichloromethane (3 mL). The test-tube was capped and the reaction mixture was irradiated with LED light ( $\lambda = 400$  nm) while stirring for 12 h. The reaction mixture was then quenched with saturated solution of sodium hydrogen carbonate (3 mL), extracted with ethyl acetate (3 × 10 mL). The organic layer was collected, dried over anhydrous sodium sulfate, concentrated under reduced pressure, and the remaining material was purified by flash chromatography on silica gel (hexane/ ethyl acetate 7 : 3 v/v) to give the sulfonamide product **8k** (53 mg, 67%) as a yellow liquid.

<sup>1</sup>H NMR (500 MHz, CDCl<sub>3</sub>): 7.17–7.09 (2 H, m), 6.99 (1 H, d, *J* = 7.7 Hz), 6.90 (1 H, td, *J* = 7.4, 1.0 Hz), 4.25–4.13 (1 H, m), 3.54 (1 H, td, *J* = 10.0, 5.3 Hz), 3.22 (1 H, ddd, *J* = 15.7, 10.5, 5.3 Hz), 3.11 (1 H, ddd, *J* = 15.6, 10.2, 8.4 Hz), 2.85 (1 H, tt, *J* = 11.1, 3.9 Hz), 2.26–2.15 (1 H, m), 1.98–1.79 (3 H, m), 1.75–1.65 (1 H, m), 1.59–1.20 (5 H, m) ppm. – <sup>13</sup>C NMR (125 MHz, CDCl<sub>3</sub>): 147.7, 131.0, 127.7, 125.3, 122.5, 111.7, 60.4, 40.6, 28.9, 27.4, 26.4, 25.6, 25.4, 25.2 ppm. – IR: 2960, 2931, 2871, 1646, 1456, 1264, 1167, 1046 cm<sup>-1</sup>. – HRMS: calcd for C<sub>14</sub>H<sub>20</sub>NO<sub>2</sub>S: 266.1209, found 266.1208 [M+H<sup>+</sup>].  
 – HRMS: calcd for C<sub>14</sub>H<sub>22</sub>NO<sub>2</sub>S: 268.1366, found 268.1365 [M+H<sup>+</sup>].

### 4-Phenyl-*N*-(3,4,5-trimethylphenyl)butane-1-sulfonamide (**8l**)

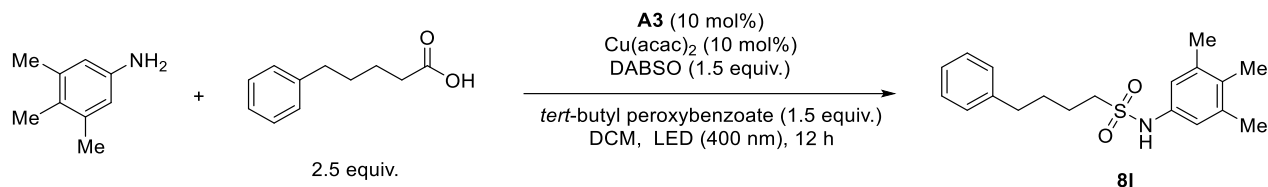

According to **GP2**, the reaction was carried out with 3,4,5-trimethylaniline (41 mg, 0.3 mmol), 5-phenylpentanoic acid (134 mg, 0.75 mmol, 2.5 equiv.), DABSO (108 mg, 0.45 mmol, 1.5 equiv.), acridine **A3** (9 mg, 0.03 mmol, 10 mol%), *tert*-butyl peroxybenzoate (87 mg, 0.45 mmol, 1.5 equiv.), Cu(acac)<sub>2</sub> (8 mg, 0.03 mmol, 10 mol%) in degassed dichloromethane (3 mL). The test-tube was capped and the reaction mixture was irradiated with LED light ( $\lambda = 400$  nm) while stirring for 12 h. The reaction mixture was then quenched with saturated solution of sodium hydrogen carbonate (3 mL), extracted with ethyl acetate ( $3 \times 10$  mL). The organic layer was collected, dried over anhydrous sodium sulfate, concentrated under reduced pressure, and the remaining material was purified by flash chromatography on silica gel (hexane/ ethyl acetate 1 : 4 v/v) to give the sulfonamide **8l** (87 mg, 71%) as a yellow oil.

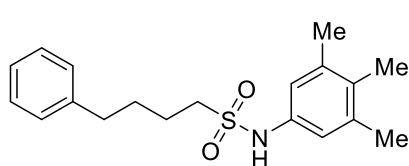

<sup>1</sup>H NMR (500 MHz, CDCl<sub>3</sub>): 6.82–6.65 (3 H, m), 2.96 (2 H, t,  $J = 7.7$  Hz), 2.19 (6 H, s), 2.09 (3 H, s), 1.72 (2 H, quint.,  $J = 7.6$  Hz), 1.49–1.13 (24 H, m), 0.89 (3 H, t,  $J = 6.7$  Hz) ppm.

– <sup>13</sup>C NMR (125 MHz, CDCl<sub>3</sub>): 138.3, 137.6, 129.9, 118.1, 56.0, 32.1, 29.82, 29.79, 29.76, 29.7, 29.52, 29.49, 29.4, 28.8, 23.5, 22.8, 20.7, 14.8, 14.2 ppm. – IR: 3063, 3029, 2939, 2919, 2865, 2631, 1706, 1596, 1552, 1485, 1453, 1265, 1169, 1037, 909, 736, 701 cm<sup>-1</sup>. – HRMS: calcd for C<sub>19</sub>H<sub>25</sub>NO<sub>2</sub>S: 331.1606, found 331.1598 [M<sup>+</sup>].

### N-(3-Isopropylphenyl)butane-1-sulfonamide (**8m**)

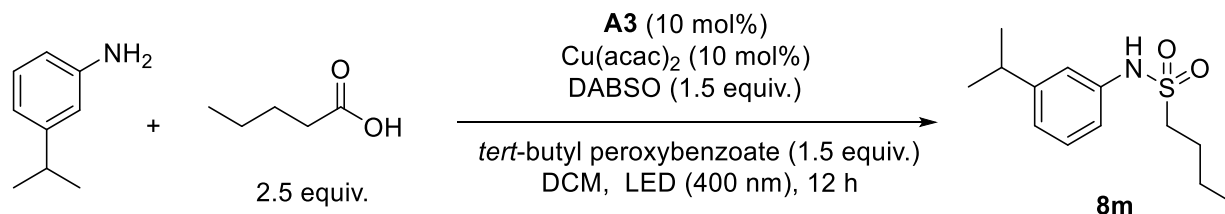

According to **GP2**, the reaction was carried out with 3-isopropylaniline (41 mg, 0.3 mmol), valeric acid (77 mg, 0.75 mmol, 2.5 equiv.), DABSO (108 mg, 0.45 mmol, 1.5 equiv.), acridine **A3** (9 mg, 0.03 mmol, 10 mol%), *tert*-butyl peroxybenzoate (70 mg, 0.36 mmol, 1.2 equiv.), Cu(acac)<sub>2</sub> (8 mg, 0.03 mmol, 10 mol%) in degassed dichloromethane (3 mL). The test-tube was capped and the reaction mixture was irradiated with LED light ( $\lambda = 400$  nm) while stirring for 12 h. The reaction mixture was then quenched with saturated solution of sodium hydrogen carbonate (3 mL), extracted with ethyl acetate (3  $\times$  10 mL). The organic layer was collected, dried over anhydrous sodium sulfate, concentrated under reduced pressure, and the remaining material was purified by flash chromatography on silica gel (hexane/ ethyl acetate 3 : 2 v/v) to give the sulfonamide **8m** (53 mg, 69%) as a yellow oil.

**Gram scale for compound 13m:** According to **GP2**, the reaction was carried out with 3-isopropylaniline (1.08 g, 8 mmol), valeric acid (2.04 g, 20 mmol, 2.5 equiv.), DABSO (2.88 g, 12 mmol, 1.5 equiv.), acridine **A3** (238 mg, 0.8 mmol, 10 mol%), *tert*-butyl peroxybenzoate (1.86 mg, 0.36 mmol, 1.2 equiv.), Cu(acac)<sub>2</sub> (211 mg, 0.8 mmol, 10 mol%) in degassed dichloromethane (80 mL). The test-tube was capped and the reaction mixture was irradiated with LED light ( $\lambda = 400$  nm) while stirring for 12 h. The reaction mixture was then quenched with saturated solution of sodium hydrogen carbonate (30 mL), extracted with ethyl acetate (3  $\times$  50 mL). The organic layer was collected, dried over anhydrous sodium sulfate, concentrated under reduced pressure, and the remaining material was purified by flash chromatography on silica gel (hexane/ ethyl acetate 3 : 2 v/v) to give the sulfonamide **8m** (1.34 g, 66%) as a yellow oil.



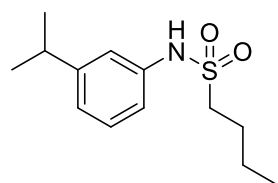

$^1\text{H}$  NMR (500 MHz,  $\text{CDCl}_3$ ): 7.36–7.22 (1 H, m), 7.14 (1 H, t,  $J = 7.8$  Hz), 6.92–6.81 (3 H, m), 3.05–2.94 (2 H, m), 2.82 (1 H, dq,  $J = 13.9, 6.9$  Hz), 1.69 (2 H, quint.,  $J = 7.6$  Hz), 1.50–1.34 (2 H, m), 1.20 (6 H, dd,  $J = 6.9, 3.3$  Hz), 0.92 (3 H, t,  $J = 7.3$  Hz) ppm. –  $^{13}\text{C}$  NMR (125 MHz,  $\text{CDCl}_3$ ): 150.6, 141.6, 129.4, 121.1, 116.4, 115.6, 55.7, 34.2, 25.5, 24.0, 21.9, 13.8 ppm. – IR: 3438, 2960, 2929, 2872, 1737, 1607, 1591, 1539, 1499, 1319, 1157, 1036, 791, 733  $\text{cm}^{-1}$ . – HRMS: calcd for  $\text{C}_{13}\text{H}_{22}\text{NO}_2\text{S}$ : 256.1366, found 256.1375  $[\text{M}+\text{H}^+]$ .

### ***N*-(3-Acetylphenyl)butane-1-sulfonamide (8n)**

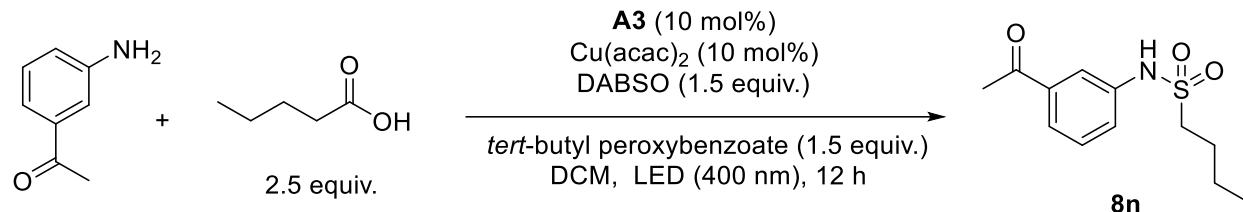

According to **GP2**, the reaction was carried out with 1-(3-aminophenyl)ethan-1-one (41 mg, 0.3 mmol), valeric acid (77 mg, 0.75 mmol, 2.5 equiv.), DABSO (108 mg, 0.45 mmol, 1.5 equiv.), acridine **A3** (9 mg, 0.03 mmol, 10 mol%), *tert*-butyl peroxybenzoate (87 mg, 0.45 mmol, 1.5 equiv.),  $\text{Cu}(\text{acac})_2$  (8 mg, 0.03 mmol, 10 mol%) in degassed dichloromethane (3 mL). The test-tube was capped and the reaction mixture was irradiated with LED light ( $\lambda = 400$  nm) while stirring for 12 h. The reaction mixture was then quenched with saturated solution of sodium hydrogen carbonate (3 mL), extracted with ethyl acetate ( $3 \times 10$  mL). The organic layer was collected, dried over anhydrous sodium sulfate, concentrated under reduced pressure, and the remaining material was purified by flash chromatography on silica gel (hexane/ ethyl acetate 3 : 2 v/v) to give the sulfonamide **8n** (41 mg, 53%) as a yellow oil.

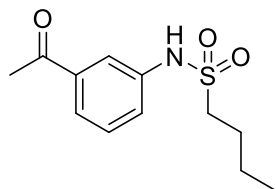

$^1\text{H}$  NMR (500 MHz,  $\text{CDCl}_3$ ): 7.82 (1 H, s), 7.53 (1 H, t,  $J = 2.0$  Hz), 7.48 (1 H, dt,  $J = 7.6, 1.4$  Hz), 7.23 (1 H, t,  $J = 7.8$  Hz), 7.18 (1 H, ddd,  $J = 8.0, 2.4, 1.1$  Hz), 3.10–3.00 (2 H, m), 2.48 (3 H, s), 1.70 (2 H, quint.,  $J = 7.6$  Hz, 2H), 1.51–1.35 (2 H, m), 0.91 (3 H, t,  $J = 7.4$  Hz) ppm. –  $^{13}\text{C}$  NMR (125 MHz,  $\text{CDCl}_3$ ): 197.8, 142.3, 138.2, 129.7, 122.7, 122.1, 117.2, 55.6, 26.7, 25.4, 21.9, 13.8 ppm. – IR: 3365, 3076, 3053, 3008, 2967, 2901, 1712, 1423, 1361, 1272, 1222, 1157, 916, 735  $\text{cm}^{-1}$ . – HRMS: calcd for  $\text{C}_{12}\text{H}_{18}\text{NO}_3\text{S}$ : 256.1002, found 256.1009  $[\text{M}+\text{H}^+]$ .

### 1-Cyclopentyl-*N*-(2,3-dihydro-1*H*-inden-5-yl)methanesulfonamide (**8o**)

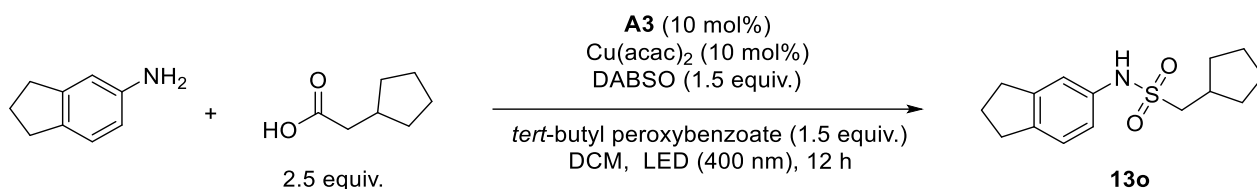

According to **GP2**, the reaction was carried out with 2,3-dihydro-1*H*-inden-5-amine (40 mg, 0.3 mmol), 2-cyclopentylacetic acid (96 mg, 0.75 mmol, 2.5 equiv.), DABSO (108 mg, 0.45 mmol, 1.5 equiv.), acridine **A3** (9 mg, 0.03 mmol, 10 mol%), *tert*-butyl peroxybenzoate (87 mg, 0.45 mmol, 1.5 equiv.),  $\text{Cu}(\text{acac})_2$  (8 mg, 0.03 mmol, 10 mol%) in degassed dichloromethane (3 mL). The test-tube was capped and the reaction mixture was irradiated with LED light ( $\lambda = 400$  nm) while stirring for 12 h. The reaction mixture was then quenched with saturated solution of sodium hydrogen carbonate (3 mL), extracted with ethyl acetate ( $3 \times 10$  mL). The organic layer was collected, dried over anhydrous sodium sulfate, concentrated under reduced pressure, and the remaining material was purified by flash chromatography on silica gel (hexane/ ethyl acetate 3 : 2 v/v) to give the sulfonamide **8o** (66 mg, 79%) as a yellow solid.

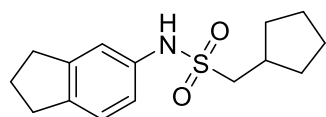

m.p.: 50–52 °C. –  $^1\text{H}$  NMR (500 MHz,  $\text{CDCl}_3$ ): 7.14 (1 H, s), 7.05 (1 H, d,  $J = 7.9$  Hz), 6.92 (1 H, d,  $J = 2.1$  Hz), 6.80 (1 H, dd,  $J = 8.0, 2.1$  Hz), 3.10–2.93 (2 H, m), 2.80 (4 H, tq,  $J = 15.8, 8.4, 7.3$  Hz), 2.23 (1 H, quint.,  $J = 7.9$  Hz),

2.09–1.90 (3 H, m), 1.87–1.76 (1 H, m), 1.72–1.50 (4 H, m), 1.33–1.19 (2 H, m) ppm. –  $^{13}\text{C}$  NMR (125 MHz,  $\text{CDCl}_3$ ): 145.7, 139.7, 139.0, 124.9, 116.9, 115.1, 62.1, 35.3, 33.0, 32.6, 32.2, 25.7, 25.1, 25.0 ppm. – IR: 2949, 2927, 2867, 2849, 1613, 1490, 1451, 1326, 1266, 1154, 1037, 907, 733  $\text{cm}^{-1}$ . – HRMS: calcd for  $\text{C}_{15}\text{H}_{22}\text{NO}_2\text{S}$ : 280.1366, found 280.1371  $[\text{M}+\text{H}^+]$ .

### ***N*-(2-(Methylthio)phenyl)tetrahydro-2*H*-pyran-4-sulfonamide (8p)**

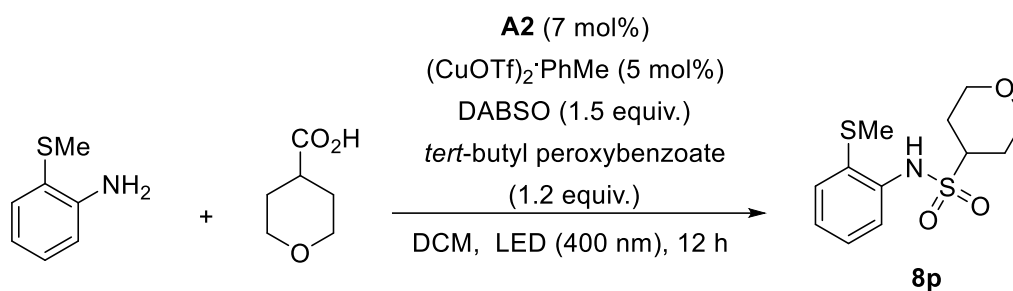

According to **GP2**, the reaction was carried out with 2-(methylthio)aniline (42 mg, 0.3 mmol), tetrahydro-2*H*-pyran-4-carboxylic acid (98 mg, 0.75 mmol, 2.5 equiv.), DABSO (108 mg, 0.45 mmol, 1.5 equiv.), acridine **A2** (6 mg, 0.02 mmol, 7 mol%), *tert*-butyl peroxybenzoate (87 mg, 0.45 mmol, 1.5 equiv.),  $(\text{CuOTf})_2 \cdot \text{PhMe}$  (7 mg, 0.015 mmol, 5 mol%) in degassed dichloromethane (3 mL). The test-tube was capped and the reaction mixture was irradiated with LED light ( $\lambda = 400 \text{ nm}$ ) while stirring for 12 h. The reaction mixture was then quenched with saturated solution of sodium hydrogen carbonate (3 mL), extracted with ethyl acetate ( $3 \times 10 \text{ mL}$ ). The organic layer was collected, dried over anhydrous sodium sulfate, concentrated under reduced pressure, and the remaining material was purified by flash chromatography on silica gel (hexane/ ethyl acetate 3 : 2 v/v) to give the sulfonamide **8p** (48 mg, 56%) as a yellow oil.

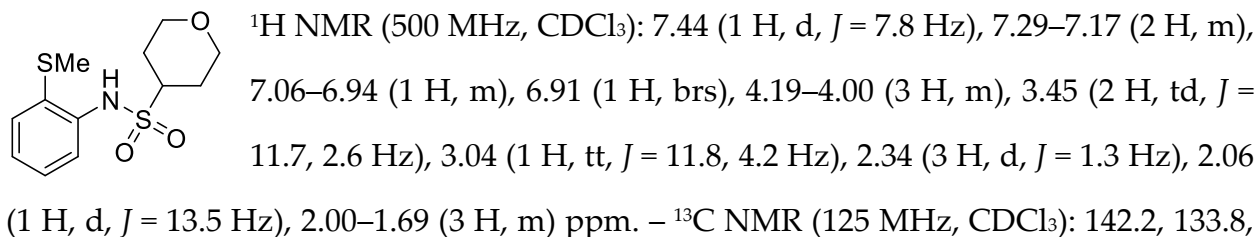

129.4, 126.1, 123.8, 117.6, 67.0, 66.9, 60.4, 26.4, 26.1, 19.3 ppm. – IR: 3418, 2956, 2850, 1626, 1479, 1447, 1318, 1268, 1238, 1199, 1159, 1130, 1105, 1085, 1048, 1012 cm<sup>-1</sup>. – HRMS: calcd for C<sub>12</sub>H<sub>16</sub>NO<sub>3</sub>S<sub>2</sub>: 286.0577, found 286.0578 [M-H].

### ***N*-(3,5-Dimethylphenyl)heptane-4-sulfonamide (8q)**

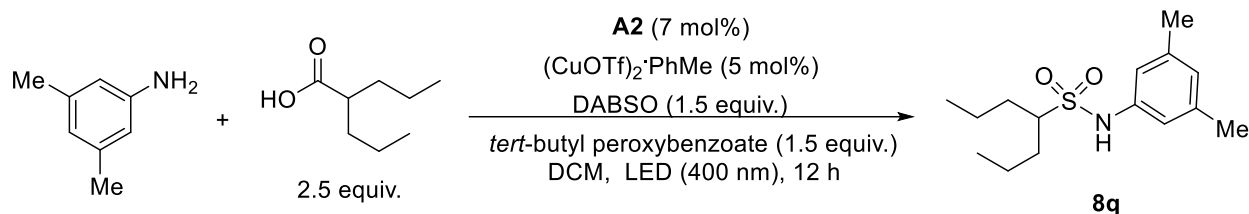

According to **GP2**, the reaction was carried out with 3,5-dimethylaniline (36 mg, 0.3 mmol), valproic acid (108 mg, 0.75 mmol, 2.5 equiv.), DABSO (108 mg, 0.45 mmol, 1.5 equiv.), acridine **A2** (6 mg, 0.02 mmol, 7 mol%), *tert*-butyl peroxybenzoate (87 mg, 0.45 mmol, 1.5 equiv.), (CuOTf)<sub>2</sub>·PhMe (7 mg, 0.015 mmol, 5 mol%) in degassed dichloromethane (3 mL). The test-tube was capped and the reaction mixture was irradiated with LED light ( $\lambda$  = 400 nm) while stirring for 12 h. The reaction mixture was then quenched with saturated solution of sodium hydrogen carbonate (3 mL), extracted with ethyl acetate (3 × 10 mL). The organic layer was collected, dried over anhydrous sodium sulfate, concentrated under reduced pressure, and the remaining material was purified by flash chromatography on silica gel (hexane/ ethyl acetate 3 : 2 v/v) to give the sulfonamide **8q** (43 mg, 51%) as a yellow oil.

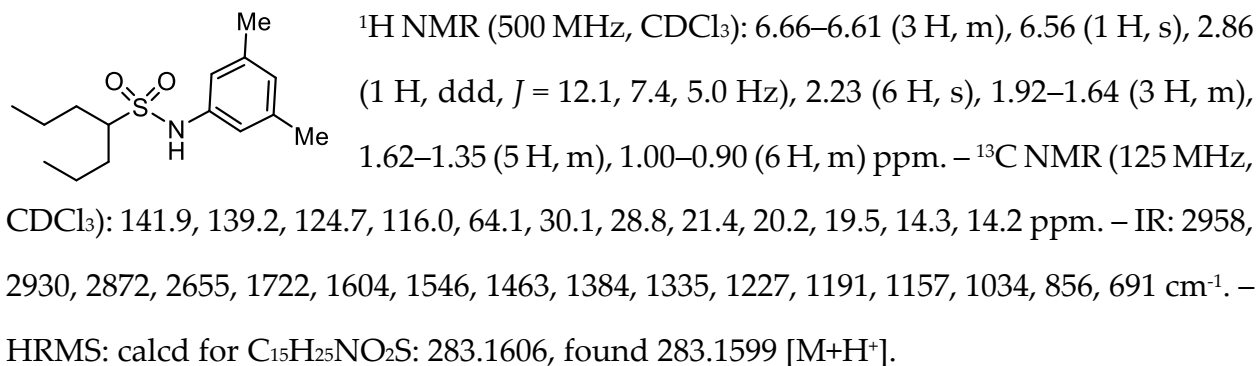

## ***N*-(2,3-Dihydro-1*H*-inden-5-yl)-4,4-difluorocyclohexane-1-sulfonamide**

**(8r)**

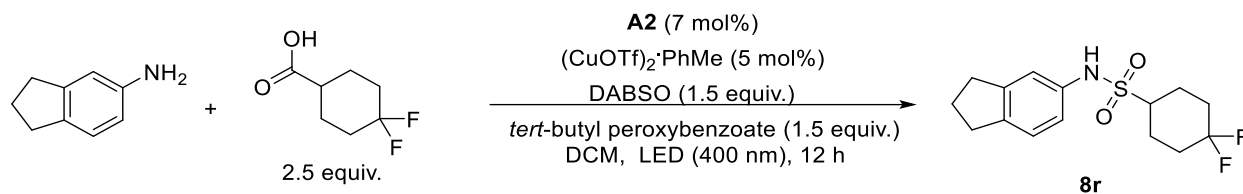

According to **GP2**, the reaction was carried out with 2,3-dihydro-1*H*-inden-5-amine (40 mg, 0.3 mmol), 4,4-difluorocyclohexane-1-carboxylic acid (123 mg, 0.75 mmol, 2.5 equiv.), DABSO (108 mg, 0.45 mmol, 1.5 equiv.), acridine **A2** (6 mg, 0.02 mmol, 7 mol%), *tert*-butyl peroxybenzoate (87 mg, 0.45 mmol, 1.5 equiv.),  $(\text{CuOTf})_2 \cdot \text{PhMe}$  (7 mg, 0.015 mmol, 5 mol%) in degassed dichloromethane (3 mL). The test-tube was capped and the reaction mixture was irradiated with LED light ( $\lambda = 400 \text{ nm}$ ) while stirring for 12 h. The reaction mixture was then quenched with saturated solution of sodium hydrogen carbonate (3 mL), extracted with ethyl acetate ( $3 \times 10 \text{ mL}$ ). The organic layer was collected, dried over anhydrous sodium sulfate, concentrated under reduced pressure, and the remaining material was purified by flash chromatography on silica gel (hexane/ ethyl acetate 3 : 2 v/v) to give the sulfonamide **8r** (79 mg, 83%) as a yellow solid.

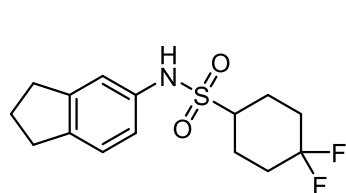

m.p.: 60–62 °C. –  $^1\text{H}$  NMR (500 MHz,  $\text{CDCl}_3$ ): 7.13–7.05 (2 H, m), 6.93 (1 H, d,  $J = 2.1 \text{ Hz}$ ), 6.81 (1 H, dd,  $J = 8.0, 2.2 \text{ Hz}$ ), 2.91 (1 H, td,  $J = 9.9, 9.1, 5.5 \text{ Hz}$ ), 2.82 (4 H, dt,  $J = 13.1, 7.1 \text{ Hz}$ ), 2.22–2.01 (6 H, m), 1.95–1.56 (4 H, m) ppm. –  $^{13}\text{C}$  NMR (125 MHz,  $\text{CDCl}_3$ ): 145.9, 139.5, 139.4, 125.0, 122.3 (t,  $^1J_{\text{C-F}} = 241.3 \text{ Hz}$ ), 116.8, 114.9, 60.1, 32.9, 32.2 (q,  $^2J_{\text{C-F}} = 24.7 \text{ Hz}$ ), 32.1, 25.6, 23.1 (dd,  $^2J_{\text{C-F}}, ^3J_{\text{C-F}} = 32.8, 8.3 \text{ Hz}$ ) ppm. –  $^{19}\text{F}$  NMR (470 MHz,  $\text{CDCl}_3$ ): –95.38 (d,  $J = 235.9 \text{ Hz}$ ), –101.25 (d,  $J = 242.2 \text{ Hz}$ ) ppm. – IR: 3156, 2940, 2870, 2845, 1717, 1613, 1596, 1489, 1448, 1374, 1292, 1269, 1122, 1106, 1051, 960, 857, 816  $\text{cm}^{-1}$ . – HRMS: calcd for  $\text{C}_{15}\text{H}_{20}\text{F}_2\text{NO}_2\text{S}$ : 316.1177, found 316.1182 [ $\text{M}+\text{H}^+$ ].

### ***N*-(2-Chloro-4-methoxyphenyl)tetrahydro-2*H*-pyran-4-sulfonamide (8s)**

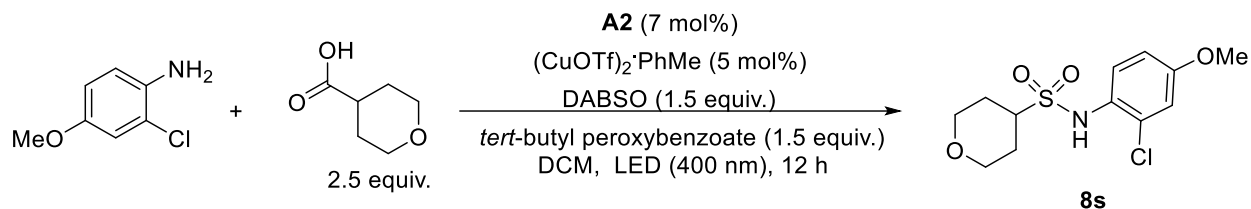

According to **GP2**, the reaction was carried out with 2,3-dihydro-1*H*-inden-5-amine (40 mg, 0.3 mmol), 4,4-difluorocyclohexane-1-carboxylic acid (123 mg, 0.75 mmol, 2.5 equiv.), DABSO (108 mg, 0.45 mmol, 1.5 equiv.), acridine **A2** (6 mg, 0.02 mmol, 7 mol%), *tert*-butyl peroxybenzoate (87 mg, 0.45 mmol, 1.5 equiv.), (CuOTf)<sub>2</sub>•PhMe (7 mg, 0.015 mmol, 5 mol%) in degassed dichloromethane (3 mL). The test-tube was capped and the reaction mixture was irradiated with LED light ( $\lambda = 400$  nm) while stirring for 12 h. The reaction mixture was then quenched with saturated solution of sodium hydrogen carbonate (3 mL), extracted with ethyl acetate (3  $\times$  10 mL). The organic layer was collected, dried over anhydrous sodium sulfate, concentrated under reduced pressure, and the remaining material was purified by flash chromatography on silica gel (hexane/ ethyl acetate 3 : 2 v/v) to give the sulfonamide **8s** (75 mg, 82%) as a yellow oil.

<sup>1</sup>H NMR (500 MHz, CDCl<sub>3</sub>): 7.08 (1 H, d,  $J = 2.7$  Hz), 6.95–6.87 (2 H, m), 6.77 (1 H, d,  $J = 8.8$  Hz), 4.12–4.00 (2 H, m), 3.84 (3 H, s), 3.36 (2 H, dtd,  $J = 22.8, 11.5, 2.4$  Hz), 3.04 (1 H, tt,  $J = 11.7, 4.2$  Hz), 2.05–1.66 (4 H, m) ppm. – <sup>13</sup>C NMR (125 MHz, CDCl<sub>3</sub>): 151.8, 135.0, 123.2, 121.9, 118.9, 113.0, 66.9, 66.7, 59.9, 56.6, 26.9, 26.4 ppm. – IR: 3058, 3024, 2982, 2844, 1796, 1573, 1504, 1460, 1264, 1152, 1064, 909, 731, 705 cm<sup>-1</sup>. – HRMS: calcd for C<sub>12</sub>H<sub>16</sub>ClNO<sub>4</sub>S: 305.0489, found 305.0489 [M<sup>+</sup>].

## N-(4-Chlorophenyl)-N-methylbutane-1-sulfonamide (8t)

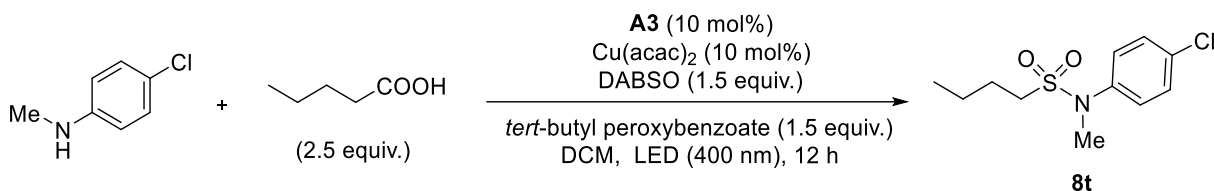

According to **GP2**, the reaction was carried out with 4-chloro-*N*-methylaniline (42 mg, 0.3 mmol), pentanoic acid (77 mg, 0.75 mmol, 2.5 equiv.), DABSO (108 mg, 0.45 mmol, 1.5 equiv.), acridine **A3** (9 mg, 0.03 mmol, 10 mol%), *tert*-butyl peroxybenzoate (87 mg, 0.45 mmol, 1.5 equiv.),  $\text{Cu}(\text{acac})_2$  (8 mg, 0.03 mmol, 10 mol%) in degassed dichloromethane (3 mL). The test-tube was capped and the reaction mixture was irradiated with LED light ( $\lambda = 400$  nm) while stirring for 12 h. The reaction mixture was then quenched with saturated solution of sodium hydrogen carbonate (3 mL), extracted with ethyl acetate ( $3 \times 10$  mL). The organic layer was collected, dried over anhydrous sodium sulfate, concentrated under reduced pressure, and the remaining material was purified by flash chromatography on silica gel (hexane/ ethyl acetate 7 : 3 v/v) to give the sulfonamide product **8t** (42 mg, 54%) as a yellow liquid.

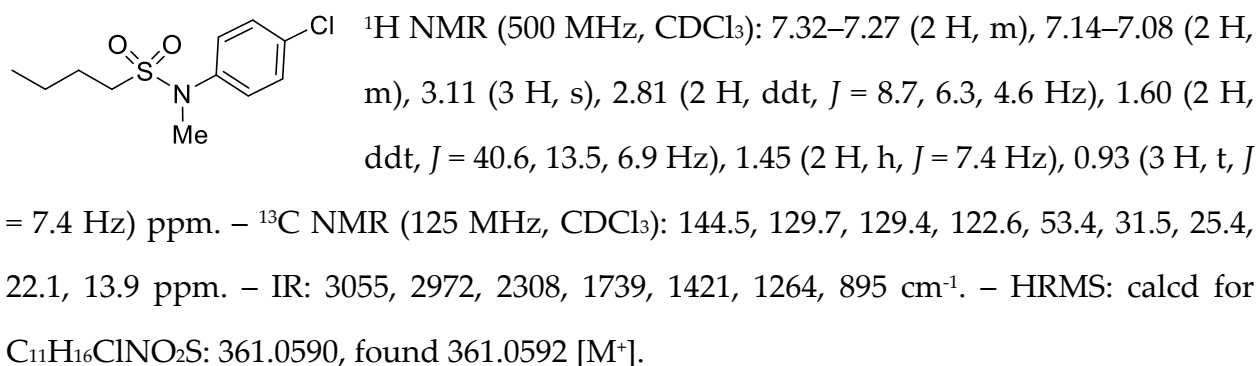

## 1-((4,4-Difluorocyclohexyl)sulfonyl)indoline (8u)

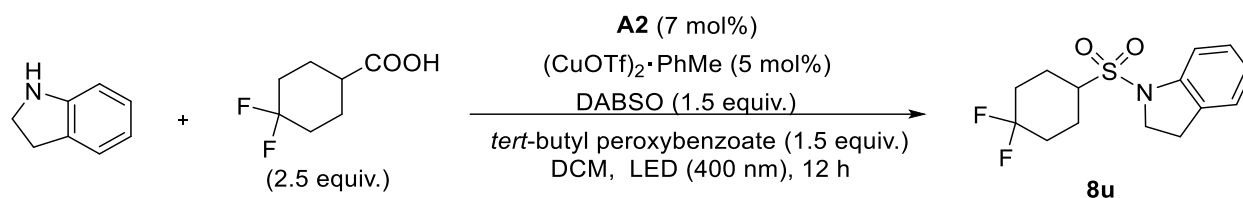

According to **GP2**, the reaction was carried out with indoline (36 mg, 0.3 mmol), 4,4-difluorocyclohexane-1-carboxylic acid (123 mg, 0.75 mmol, 2.5 equiv.), DABSO (108 mg, 0.45 mmol, 1.5 equiv.), acridine **A2** (6 mg, 0.02 mmol, 7 mol%), *tert*-butyl peroxybenzoate (87 mg, 0.45 mmol, 1.5 equiv.), ( $\text{CuOTf}$ )<sub>2</sub>·PhMe (7 mg, 0.015 mmol, 5 mol%) in degassed dichloromethane (3 mL). The test-tube was capped and the reaction mixture was irradiated with LED light ( $\lambda = 400$  nm) while stirring for 12 h. The reaction mixture was then quenched with saturated solution of sodium hydrogen carbonate (3 mL), extracted with ethyl acetate (3 × 10 mL). The organic layer was collected, dried over anhydrous sodium sulfate, concentrated under reduced pressure, and the remaining material was purified by flash chromatography on silica gel (hexane/ ethyl acetate 3 : 2 v/v) to give the sulfonamide product **8u** (61 mg, 68%) as a white solid.

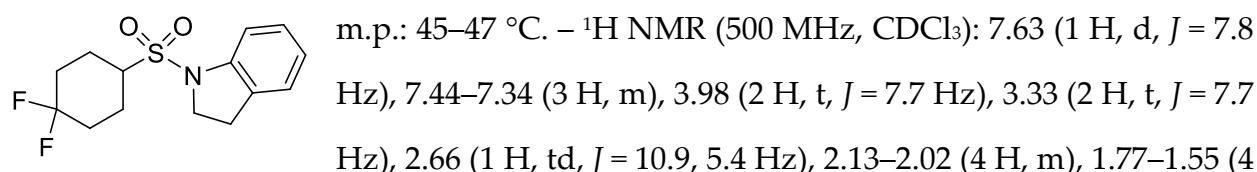

– <sup>13</sup>C NMR (125 MHz, CDCl<sub>3</sub>): 136.2, 135.0, 129.8, 128.4, 125.8, 122.8 (t, *J* = 241.2 Hz), 120.0, 56.4, 46.0, 32.5 (t, *J* = 24.5 Hz), 29.3, 24.0 (d, *J* = 9.5 Hz) ppm. – <sup>19</sup>F NMR (470 MHz, CDCl<sub>3</sub>): –94.00 (d, *J* = 241.8 Hz), –102.07 (d, *J* = 238.1 Hz), ppm. – IR: 2960, 2922, 2853, 2522, 1723, 1621, 1593, 1466, 1466, 1375, 1207, 1149 cm<sup>–1</sup>. – HRMS: calcd for C<sub>14</sub>H<sub>18</sub>F<sub>2</sub>NO<sub>2</sub>S: 302.1021, found 302.1021 [M+H<sup>+</sup>].



***tert*-Butyl 4-(*N*-(3,4,5-trimethylphenyl)sulfamoyl)piperidine-1-carboxylate (**8v**)**

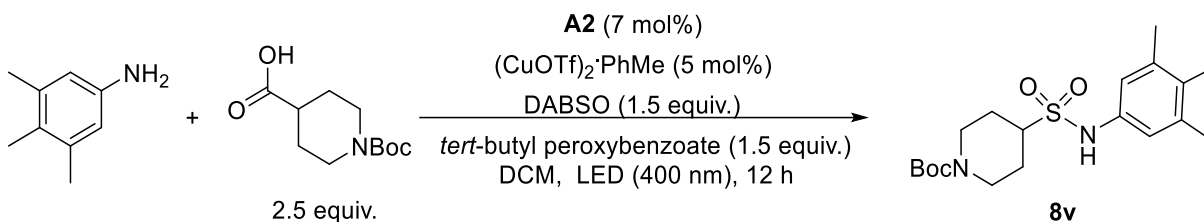

According to **GP2**, the reaction was carried out with 3,4,5-trimethylaniline (41 mg, 0.3 mmol), 1-(*tert*-butoxycarbonyl)piperidine-4-carboxylic acid (172 mg, 0.75 mmol, 2.5 equiv.), DABSO (108 mg, 0.45 mmol, 1.5 equiv.), acridine **A2** (6 mg, 0.02 mmol, 7 mol%), *tert*-butyl peroxybenzoate (87 mg, 0.45 mmol, 1.5 equiv.),  $(\text{CuOTf})_2 \cdot \text{PhMe}$  (7 mg, 0.015 mmol, 5 mol%) in degassed dichloromethane (3 mL). The test-tube was capped and the reaction mixture was irradiated with LED light ( $\lambda = 400 \text{ nm}$ ) while stirring for 12 h. The reaction mixture was then quenched with saturated solution of sodium hydrogen carbonate (3 mL), extracted with ethyl acetate ( $3 \times 10 \text{ mL}$ ). The organic layer was collected, dried over anhydrous sodium sulfate, concentrated under reduced pressure, and the remaining material was purified by flash chromatography on silica gel (hexane/ ethyl acetate 3 : 2 v/v) to give the sulfonamide **8v** (85 mg, 74%) as a yellow oil.

$^1\text{H}$  NMR (500 MHz,  $\text{CDCl}_3$ ): 6.69–6.53 (3 H, m), 4.13 (2 H, s), 2.96 (1 H, tt,  $J = 11.5, 4.0 \text{ Hz}$ ), 2.87–2.64 (2 H, m), 2.19 (6 H, s), 2.08 (4 H, s), 2.03–1.92 (1 H, m), 1.78–1.51 (2 H, m), 1.46 (9 H, s) ppm. –  $^{13}\text{C}$  NMR (125 MHz,  $\text{CDCl}_3$ ): 154.7, 138.3, 137.8, 130.3, 118.2, 80.1, 61.1, 43.2, 28.5, 26.3, 25.8, 20.7, 14.9 ppm. – IR: 3055, 2956, 2308, 1738, 1424, 1365, 1265, 1216, 908  $\text{cm}^{-1}$ . – HRMS: calcd for  $\text{C}_{19}\text{H}_{31}\text{N}_2\text{O}_4\text{S}$ : 383.1999, found 383.2010  $[\text{M}+\text{H}^+]$ .

## ***N*-(2-Methylbenzo[d]thiazol-6-yl)butane-1-sulfonamide (8w)**

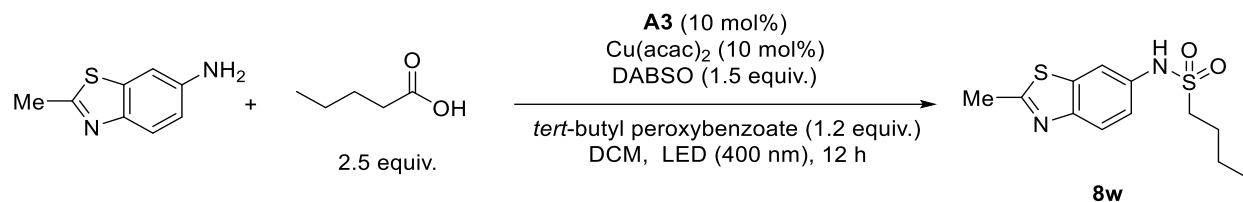

According to **GP2**, the reaction was carried out with 2-methylbenzo[d]thiazol-6-amine (49 mg, 0.3 mmol), valeric acid (77 mg, 0.75 mmol, 2.5 equiv.), DABSO (108 mg, 0.45 mmol, 1.5 equiv.), acridine **A3** (9 mg, 0.03 mmol, 10 mol%), *tert*-butyl peroxybenzoate (70 mg, 0.36 mmol, 1.2 equiv.),  $\text{Cu(acac)}_2$  (8 mg, 0.03 mmol, 10 mol%) in degassed dichloromethane (3 mL). The test-tube was capped and the reaction mixture was irradiated with LED light ( $\lambda = 400 \text{ nm}$ ) while stirring for 12 h. The reaction mixture was then quenched with saturated solution of sodium hydrogen carbonate (3 mL), extracted with ethyl acetate ( $3 \times 10 \text{ mL}$ ). The organic layer was collected, dried over anhydrous sodium sulfate, concentrated under reduced pressure, and the remaining material was purified by flash chromatography on silica gel (hexane/ ethyl acetate 3 : 2 v/v) to give the sulfonamide **8w** (60 mg, 70%) as a yellow oil.

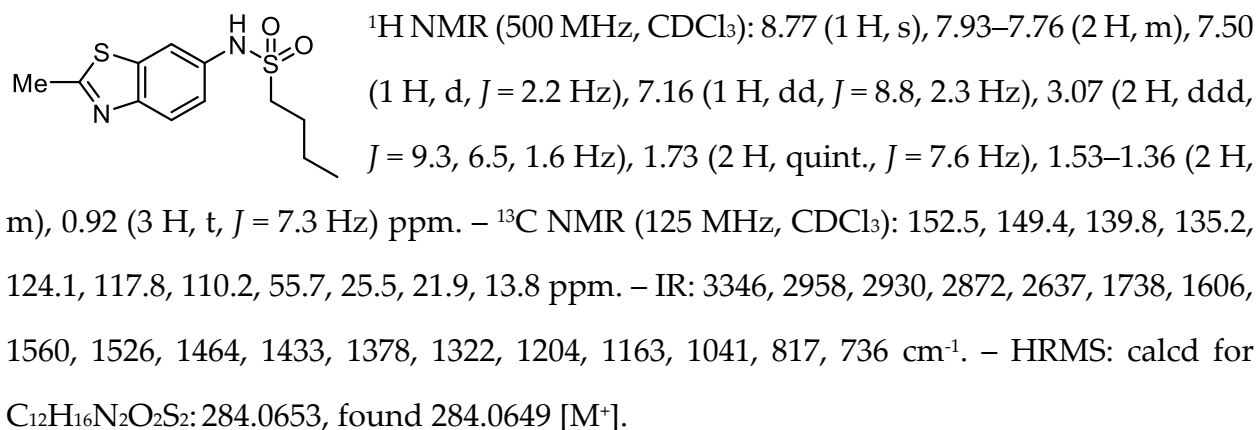

### 1-((3,3,3-Trifluoropropyl)sulfonyl)indoline (8x)

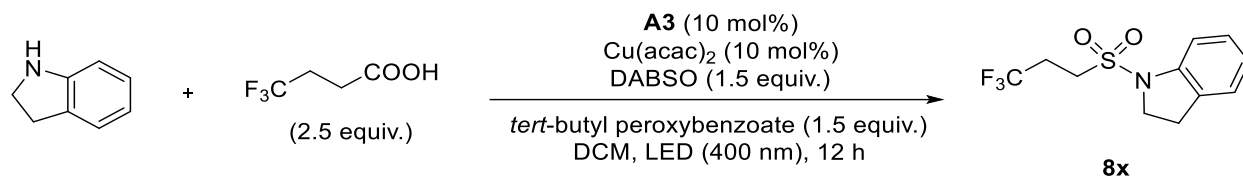

According to **GP2**, the reaction was carried out with indoline (36 mg, 0.3 mmol), 4,4,4-trifluorobutanoic acid (107 mg, 0.75 mmol, 2.5 equiv.), DABSO (108 mg, 0.45 mmol, 1.5 equiv.), acridine **A3** (9 mg, 0.03 mmol, 10 mol%), *tert*-butyl peroxybenzoate (87 mg, 0.45 mmol, 1.5 equiv.), Cu(acac)<sub>2</sub> (8 mg, 0.03 mmol, 10 mol%) in degassed dichloromethane (3 mL). The test-tube was capped and the reaction mixture was irradiated with LED light ( $\lambda$  = 400 nm) while stirring for 12 h. The reaction mixture was then quenched with saturated solution of sodium hydrogen carbonate (3 mL), extracted with ethyl acetate (3 × 10 mL). The organic layer was collected, dried over anhydrous sodium sulfate, concentrated under reduced pressure, and the remaining material was purified by flash chromatography on silica gel (hexane/ ethyl acetate 7 : 3 v/v) to give the sulfonamide product **8x** (52 mg, 62%) as a yellow liquid.

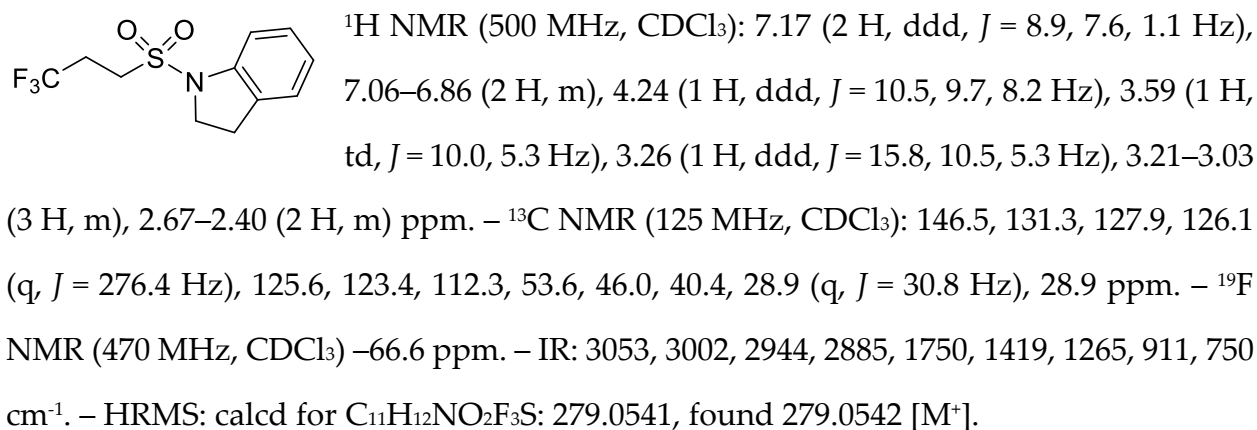

## Sulfonyl azides

### 2-(3,4-Dimethoxyphenyl)ethane-1-sulfonyl azide (**9a**)

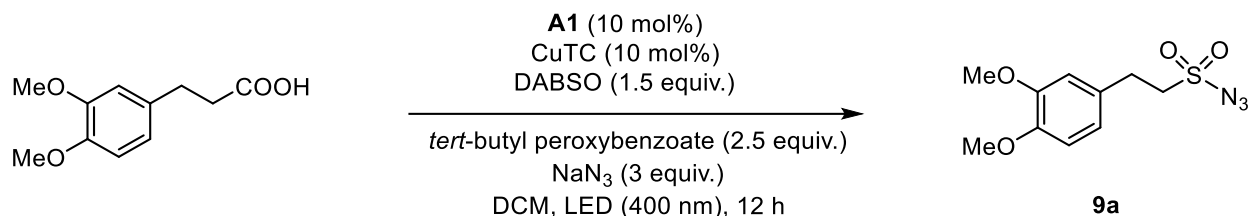

According to **GP3**, the reaction was carried out with 3-(3,4-dimethoxyphenyl)propanoic acid (63 mg, 0.3 mmol), DABSO (108 mg, 0.45 mmol, 1.5 equiv.), acridine catalyst **A1** (9 mg, 0.03 mmol, 10 mol%), potassium azide (73 mg, 0.9 mmol, 3.0 equiv.), *tert*-butyl peroxybenzoate (145 mg, 0.75 mmol, 2.5 equiv.), CuOTf·0.5PhMe (8 mg, 0.03 mmol, 10 mol%) in degassed PhCF<sub>3</sub>/MeCN (3 mL, 3 : 1 v/v). The test-tube was capped, and the reaction mixture was irradiated with LED light ( $\lambda$  = 400 nm) while stirring at room temperature for 12 h. The reaction mixture was treated with saturated solution of sodium carbonate (3 mL) and extracted with DCM (3 × 10 mL). The organic layer was collected, dried over anhydrous sodium sulfate, concentrated under reduced pressure, and the remaining material was purified by flash chromatography on silica gel (hexane/ ethyl acetate 4 : 1 v/v) to give the sulfonyl azide product **9a** (73 mg, 90%) as a colorless oil.

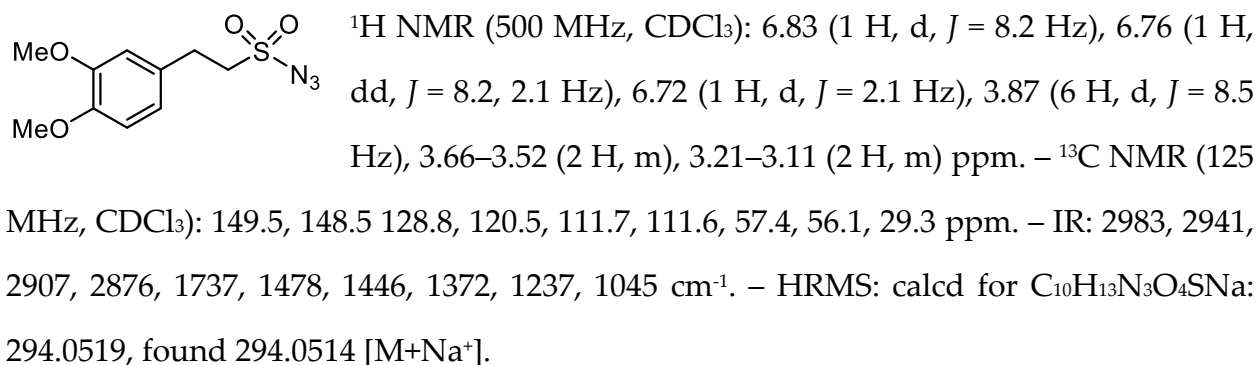

### 4-Oxo-4-phenylbutane-1-sulfonyl azide (**9b**)

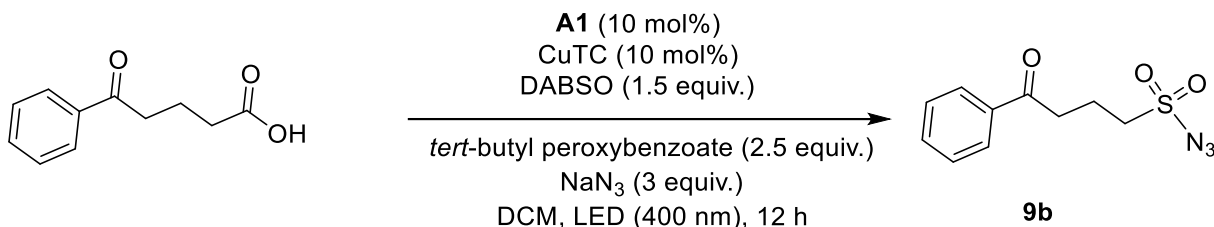

According to **GP3**, the reaction was carried out with 5-oxo-5-phenylpentanoic acid (58 mg, 0.3 mmol), DABSO (108 mg, 0.45 mmol, 1.5 equiv.), acridine catalyst **A1** (9 mg, 0.03 mmol, 10 mol%), sodium azide (59 mg, 0.9 mmol, 3.0 equiv.), *tert*-butyl peroxybenzoate (145 mg, 0.75 mmol, 2.5 equiv.), copper(I) thiophene-2-carboxylate (5 mg, 0.03 mmol, 10 mol%) in degassed PhCF<sub>3</sub>/MeCN (3 mL, 3 : 1 v/v). The test-tube was capped, and the reaction mixture was irradiated with LED light ( $\lambda = 400$  nm) while stirring at room temperature for 12 h. The reaction mixture was treated with saturated solution of sodium carbonate (3 mL) and extracted with DCM (3  $\times$  10 mL). The organic layer was collected, dried over anhydrous sodium sulfate, concentrated under reduced pressure, and the remaining material was purified by flash chromatography on silica gel (hexane/ ethyl acetate 7 : 3 v/v) to give the sulfonyl azide product **9b** (51 mg, 67%) as a colorless solid.

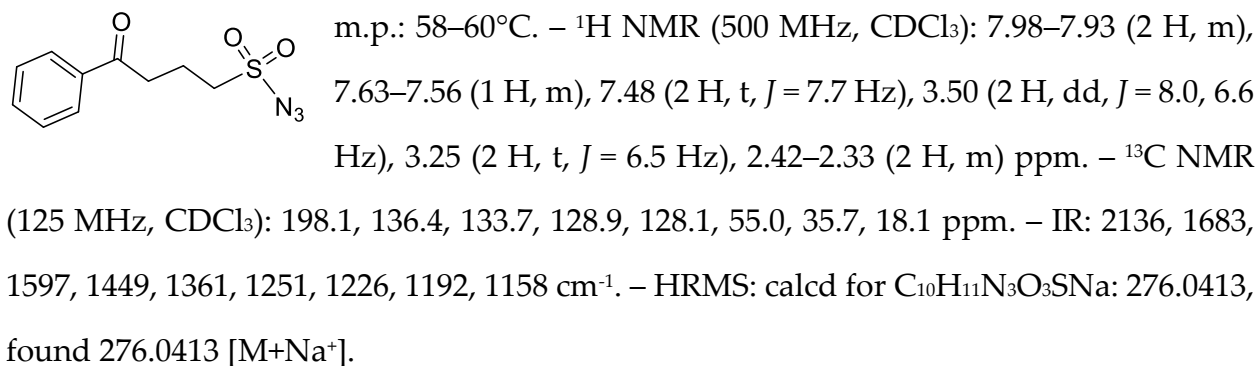

### Methyl 5-(azidosulfonyl)pentanoate (**9c**)

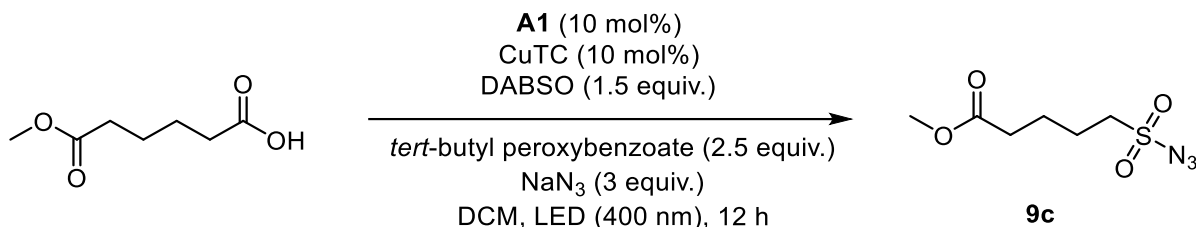

According to **GP3**, the reaction was carried out with 6-methoxy-6-oxohexanoic acid (58 mg, 0.3 mmol), DABSO (108 mg, 0.45 mmol, 1.5 equiv.), acridine catalyst **A1** (9 mg, 0.03 mmol, 10 mol%), sodium azide (59 mg, 0.9 mmol, 3.0 equiv.), *tert*-butyl peroxybenzoate (145 mg, 0.75 mmol, 2.5 equiv.), copper(I) thiophene-2-carboxylate (5 mg, 0.03 mmol, 10 mol%) in degassed PhCF<sub>3</sub>/MeCN (3 mL, 3 : 1 v/v). The test-tube was capped, and the reaction mixture was irradiated with LED light ( $\lambda = 400 \text{ nm}$ ) while stirring at room temperature for 12 h. The reaction mixture was treated with saturated solution of sodium carbonate (3 mL) and extracted with DCM (3  $\times$  10 mL). The organic layer was collected, dried over anhydrous sodium sulfate, concentrated under reduced pressure, and the remaining material was purified by flash chromatography on silica gel (hexane/ ethyl acetate 9 : 1 v/v) to give the sulfonyl azide product **9c** (50 mg, 75%) as a colorless solid.

<sup>1</sup>H NMR (500 MHz, CDCl<sub>3</sub>): 3.67 (3 H, s), 3.36–3.30 (2 H, m), 2.38 (2 H, t,  $J = 7.2 \text{ Hz}$ ), 2.00–1.88 (2 H, m), 1.85–1.73 (2 H, m) ppm. – <sup>13</sup>C NMR (125 MHz, CDCl<sub>3</sub>): 173.1, 55.6, 51.9, 33.2, 23.3, 23.0 ppm. – IR: 2990, 2956, 2927, 2854, 2331, 2139, 1736, 1486, 1371, 1267, 1204, 1060, 898, 793 cm<sup>-1</sup>. – HRMS: calcd for C<sub>6</sub>H<sub>11</sub>N<sub>3</sub>NaO<sub>4</sub>S: 244.0362, found 244.0363 [M+Na<sup>+</sup>].

### 4-(5-Methylthiophen-2-yl)-4-oxobutane-1-sulfonyl azide (**9d**)

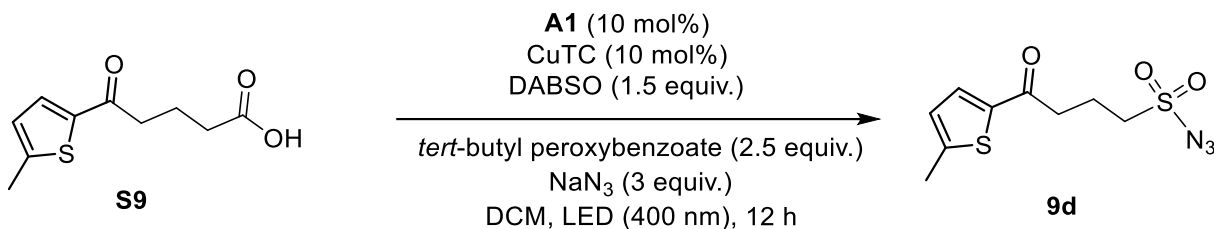

According to **GP3**, the reaction was carried out with acid **S9** (64 mg, 0.3 mmol), DABSO (108 mg, 0.45 mmol, 1.5 equiv.), acridine catalyst **A1** (9 mg, 0.03 mmol, 10 mol%), sodium azide (59 mg, 0.9 mmol, 3.0 equiv.), *tert*-butyl peroxybenzoate (145 mg, 0.75 mmol, 2.5 equiv.), copper(I) thiophene-2-carboxylate (5 mg, 0.03 mmol, 10 mol%) in degassed PhCF<sub>3</sub>/MeCN (3mL, 3 : 1 v/v). The test-tube was capped, and the reaction mixture was irradiated with LED light ( $\lambda = 400$  nm) while stirring at room temperature for 12 h. The reaction mixture was treated with saturated solution of sodium carbonate (3 mL) and extracted with DCM (3  $\times$  10 mL). The organic layer was collected, dried over anhydrous sodium sulfate, concentrated under reduced pressure, and the remaining material was purified by flash chromatography on silica gel (hexane/ ethyl acetate 7 : 3 v/v) to give the sulfonyl azide product **9d** (59 mg, 72%) as a colorless solid.

**Gramscale synthesis of compound 14d:** According to **GP3**, the reaction was carried out with acid **S9** (1.49 g, 7 mmol), DABSO (2.52 g, 10.5 mmol, 1.5 equiv.), acridine catalyst **A2** (210 mg, 0.07 mmol, 10 mol%), sodium azide (1.38 g, 21 mmol, 3.0 equiv.), *tert*-butyl peroxybenzoate (3.38 g, 17.5 mmol, 2.5 equiv.), copper(I) thiophene-2-carboxylate (98 mg, 0.07 mmol, 10 mol%) in degassed PhCF<sub>3</sub>/MeCN (70 mL, 3 : 1 v/v). The test-tube was capped, and the reaction mixture was irradiated with LED light ( $\lambda = 400$  nm) while stirring at room temperature for 12 h. The reaction mixture was treated with saturated solution of sodium carbonate (20 mL) and extracted with DCM (3  $\times$  50 mL). The organic layer was collected, dried over anhydrous sodium sulfate, concentrated under reduced pressure, and the remaining material was purified by flash chromatography on silica gel

(hexane/ ethyl acetate 7 : 3 v/v) to give the sulfonyl azide product **9d** (1.05 mg, 55%) as a colorless solid.

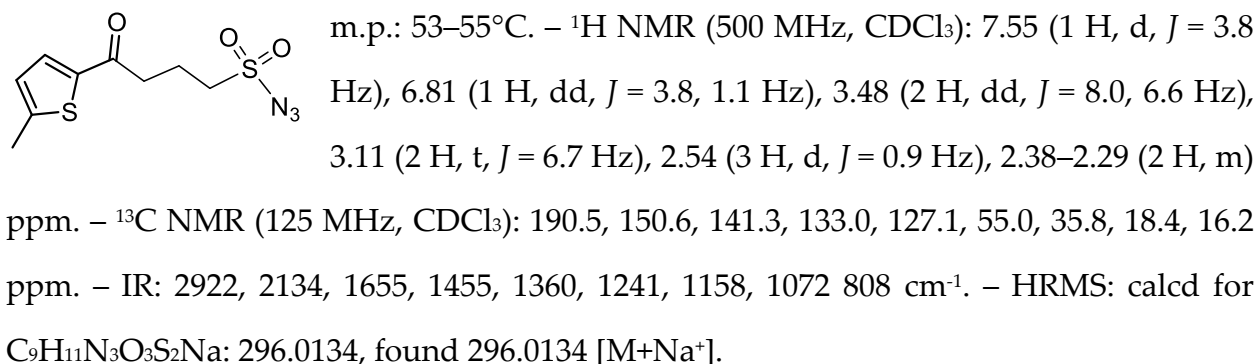

**4-Oxo-4-((3-(4,4,5,5-tetramethyl-1,3,2-dioxaborolan-2-yl)phenyl)amino)butane-1-sulfonyl azide (9e)**

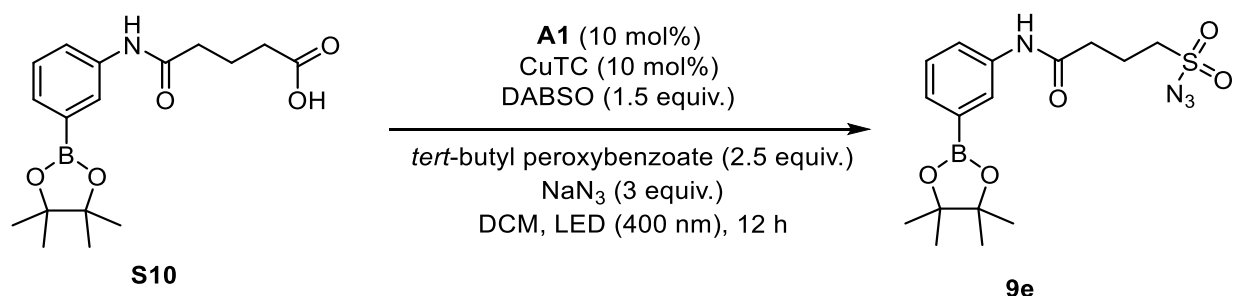

According to **GP3**, the reaction was carried out with acid **S10** (50 mg, 0.15 mmol), DABSO (54 mg, 0.23 mmol, 1.5 equiv.), acridine catalyst **A1** (4.5 mg, 0.015 mmol, 10 mol%), sodium azide (30 mg, 0.45 mmol, 3.0 equiv.), *tert*-butyl peroxybenzoate (73 mg, 0.38 mmol, 2.5 equiv.), copper(I) thiophene-2-carboxylate (5 mg, 0.03 mmol, 10 mol%) in degassed  $\text{PhCF}_3/\text{MeCN}$  (3 mL, 3 : 1 v/v). The test-tube was capped, and the reaction mixture was irradiated with LED light ( $\lambda = 400$  nm) while stirring at room temperature for 12 h. The reaction mixture was treated with saturated solution of sodium carbonate (3 mL) and extracted with DCM ( $3 \times 10$  mL). The organic layer was collected, dried over anhydrous sodium sulfate, concentrated under reduced pressure, and the remaining



material was purified by flash chromatography on silica gel (hexane/ ethyl acetate 2 : 1 v/v) to give the sulfonyl azide product **9e** (49 mg, 83%) as a colorless solid.

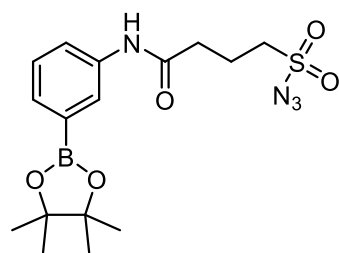

m.p.: 102–105°C. –  $^1\text{H}$  NMR (500 MHz,  $\text{CDCl}_3$ ): 7.77 (1 H, dt,  $J = 8.1, 1.6$  Hz), 7.71 (1 H, d,  $J = 2.4$  Hz), 7.56 (1 H, d,  $J = 7.3$  Hz), 7.43–7.29 (2 H, m), 3.50 (2 H, t,  $J = 7.1$  Hz), 2.59 (2 H, t,  $J = 6.8$  Hz), 2.32 (2 H, p,  $J = 7.0$  Hz), 1.33 (12 H, s) ppm. –  $^{13}\text{C}$  NMR (125 MHz,  $\text{CDCl}_3$ ): 169.1, 137.1, 131.1, 128.8, 126.0, 123.2, 84.1, 54.8, 34.2, 25.0, 19.4 ppm. –  $^{11}\text{B}$  NMR (160 MHz,  $\text{CDCl}_3$ ): –5.1 ppm. – IR: 3291, 2977, 2135, 1667, 1584, 1552, 1428, 1357, 1318, 1268, 1191, 1159, 1143, 1076, 1027  $\text{cm}^{-1}$ . – HRMS: calcd for  $\text{C}_{16}\text{H}_{23}\text{BN}_4\text{O}_4\text{SNa}$ : 417.1377, found 417.1372  $[\text{M}+\text{Na}^+]$ .

### 5-(4-Chlorobenzamido)pentane-1-sulfonyl azide (**9f**)

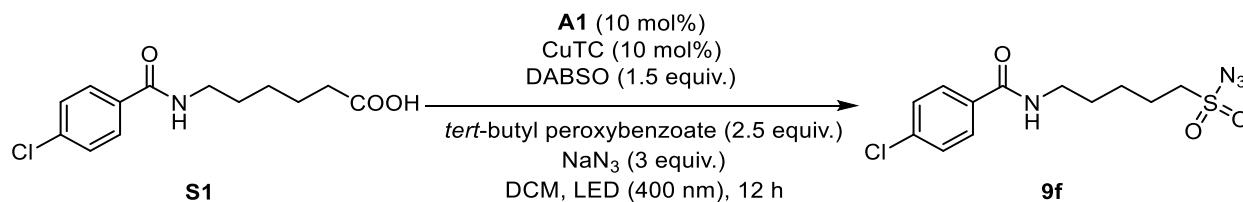

According to **GP3**, the reaction was carried out with acid **S1** (81 mg, 0.3 mmol), DABSO (108 mg, 0.45 mmol, 1.5 equiv.), acridine catalyst **A1** (9 mg, 0.03 mmol, 10 mol%), potassium azide (73 mg, 0.9 mmol, 3.0 equiv.), *tert*-butyl peroxybenzoate (145 mg, 0.75 mmol, 2.5 equiv.), copper(I) thiophene-2-carboxylate (5 mg, 0.03 mmol, 10 mol%) in degassed  $\text{PhCF}_3/\text{MeCN}$  (3 mL, 3 : 1 v/v). The test-tube was capped, and the reaction mixture was irradiated with LED light ( $\lambda = 400$  nm) while stirring at room temperature for 12 h. The reaction mixture was treated with saturated solution of sodium carbonate (3 mL) and extracted with DCM ( $3 \times 10$  mL). The organic layer was collected, dried over anhydrous sodium sulfate, concentrated under reduced pressure, and the remaining material was purified by flash chromatography on silica gel (hexane/ ethyl acetate 1 : 1 v/v) to give the sulfonyl azide product **9f** (61 mg, 62%) as a colorless oil.

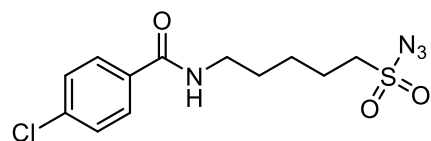

$^1\text{H}$  NMR (500 MHz,  $\text{CDCl}_3$ ): 7.69 (2 H, d,  $J = 8.5$  Hz), 7.40 (2 H, d,  $J = 8.5$  Hz), 6.27 (1 H, s), 3.46 (2 H, q,  $J = 6.7$  Hz), 3.39–3.27 (2 H, m), 2.07–1.86 (2 H, m), 1.77–1.46 (4 H, m)

ppm. –  $^{13}\text{C}$  NMR (125 MHz,  $\text{CDCl}_3$ ): 166.7, 137.9, 133.0, 129.0, 128.4, 55.8, 39.7, 29.2, 25.4, 23.2 ppm. – IR: 2983, 2942, 2908, 2256, 2030, 1885, 1736, 1558, 1465, 1446, 1393, 1372, 1300, 1235, 1097, 1044, 938, 917  $\text{cm}^{-1}$ . – HRMS: calcd for  $\text{C}_{12}\text{H}_{15}\text{ClN}_4\text{O}_3\text{SNa}$ : 353.0446, found 353.0444  $[\text{M}+\text{Na}^+]$ .

### Pentadecane-1-sulfonyl azide (**9g**)

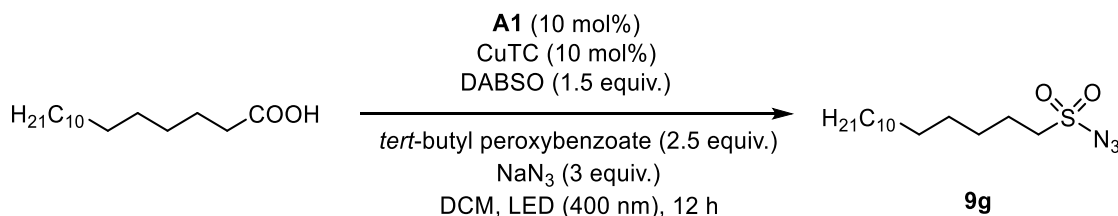

According to **GP3**, the reaction was carried out with palmitic acid (77 mg, 0.3 mmol), DABSO (108 mg, 0.45 mmol, 1.5 equiv.), acridine catalyst **A1** (9 mg, 0.03 mmol, 10 mol%), potassium azide (73 mg, 0.9 mmol, 3.0 equiv.), *tert*-butyl peroxybenzoate (145 mg, 0.75 mmol, 2.5 equiv.), copper(I) thiophene-2-carboxylate (5 mg, 0.03 mmol, 10 mol%) in degassed  $\text{PhCF}_3/\text{MeCN}$  (3 mL, 3 : 1 v/v). The test-tube was capped, and the reaction mixture was irradiated with LED light ( $\lambda = 400$  nm) while stirring at room temperature for 12 h. The reaction mixture was treated with saturated solution of sodium carbonate (3 mL) and extracted with DCM ( $3 \times 10$  mL). The organic layer was collected, dried over anhydrous sodium sulfate, concentrated under reduced pressure, and the remaining material was purified by flash chromatography on silica gel (hexane/ ethyl acetate 9 : 1 v/v) to give the sulfonyl azide product **9g** (71 mg, 75%) as a white solid.

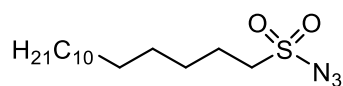

m.p.: 73–75°C. –  $^1\text{H}$  NMR (500 MHz,  $\text{CDCl}_3$ ): 3.41–3.25 (2 H, m), 1.99–1.78 (2 H, m), 1.51–1.40 (2 H, m), 1.35–1.15 (22 H, m), 0.88

(2 H, t,  $J = 6.9$  Hz) ppm. –  $^{13}\text{C}$  NMR (125 MHz,  $\text{CDCl}_3$ ): 56.1, 32.1, 29.8, 29.8, 29.8, 29.7, 29.6, 29.5, 29.3, 29.1, 28.1, 23.5, 22.8, 14.3 ppm. – IR: 3466, 2984, 2941, 2908, 2877, 2256, 1982, 1736, 1464, 1392, 1300, 1233, 1097, 1043  $\text{cm}^{-1}$ . – HRMS: calcd for  $\text{C}_{15}\text{H}_{32}\text{N}_3\text{O}_2\text{S}$ : 318.2215, found 318.2214  $[\text{M}+\text{H}^+]$ .

### *tert*-Butyl 4-(azidosulfonyl)piperidine-1-carboxylate (**9h**)

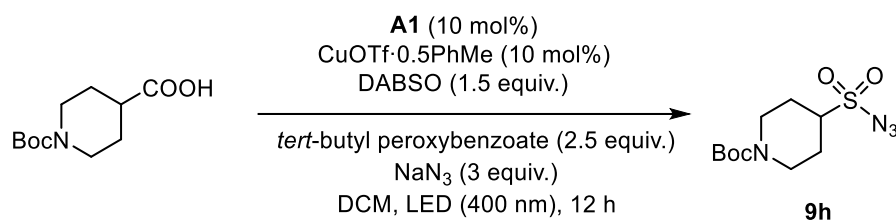

According to **GP3**, the reaction was carried out with 1-(*tert*-butoxycarbonyl)piperidine-4-carboxylic acid (69 mg, 0.3 mmol), DABSO (108 mg, 0.45 mmol, 1.5 equiv.), acridine catalyst **A1** (9 mg, 0.03 mmol, 10 mol%), potassium azide (73 mg, 0.9 mmol, 3.0 equiv.), *tert*-butyl peroxybenzoate (145 mg, 0.75 mmol, 2.5 equiv.),  $\text{CuOTf} \cdot 0.5\text{PhMe}$  (8 mg, 0.03 mmol, 10 mol%) in degassed  $\text{PhCF}_3/\text{MeCN}$  (3 mL, 3 : 1 v/v). The test-tube was capped, and the reaction mixture was irradiated with LED light ( $\lambda = 400$  nm) while stirring at room temperature for 12 h. The reaction mixture was treated with saturated solution of sodium carbonate (3 mL) and extracted with DCM ( $3 \times 10$  mL). The organic layer was collected, dried over anhydrous sodium sulfate, concentrated under reduced pressure, and the remaining material was purified by flash chromatography on silica gel (hexane/ethyl acetate 4 : 1 v/v) to give the sulfonyl azide product **9h** (48 mg, 55%) as a colorless oil.

$^1\text{H}$  NMR (500 MHz,  $\text{CDCl}_3$ ): 4.30 (2 H, s), 3.34 (1 H, tt,  $J = 12.0, 3.7$  Hz), 2.89–2.68 (2 H, m), 2.23–2.04 (2 H, m), 1.81 (2 H, qd,  $J = 12.4, 4.6$  Hz), 1.46 (9 H, s) ppm. –  $^{13}\text{C}$  NMR (125 MHz,  $\text{CDCl}_3$ ): 154.3, 80.6, 63.7, 42.5, 28.5, 25.8 ppm. – IR:

2983, 2941, 2908, 2515, 2203, 1741, 1465, 1447, 1373, 1300, 1241, 1046, 917  $\text{cm}^{-1}$ . – HRMS: calcd for  $\text{C}_{10}\text{H}_{18}\text{N}_4\text{O}_4\text{SNa}$ : 313.0941, found 313.0939  $[\text{M}+\text{Na}^+]$ .

### Tetrahydro-2*H*-pyran-4-sulfonyl azide (**9i**)

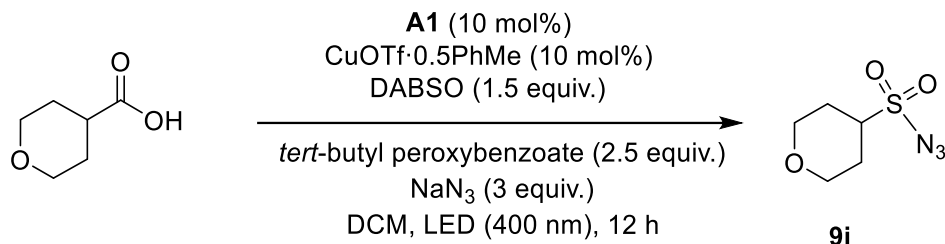

According to **GP3**, the reaction was carried out with tetrahydro-2*H*-pyran-4-carboxylic acid (39 mg, 0.3 mmol), DABSO (108 mg, 0.45 mmol, 1.5 equiv.), acridine catalyst **A1** (9 mg, 0.03 mmol, 10 mol%), sodium azide (59 mg, 0.9 mmol, 3.0 equiv.), *tert*-butyl peroxybenzoate (145 mg, 0.75 mmol, 2.5 equiv.), CuOTf·0.5PhMe (8 mg, 0.03 mmol, 10 mol%) in degassed  $\text{PhCF}_3/\text{MeCN}$  (3 mL, 3 : 1 v/v). The test-tube was capped, and the reaction mixture was irradiated with LED light ( $\lambda = 400 \text{ nm}$ ) while stirring at room temperature for 12 h. The reaction mixture was treated with saturated solution of sodium carbonate (3 mL) and extracted with DCM (3 × 10 mL). The organic layer was collected, dried over anhydrous sodium sulfate, concentrated under reduced pressure, and the remaining material was purified by flash chromatography on silica gel (hexane/ ethyl acetate 4 : 1 v/v) to give the sulfonyl azide product **9i** (37 mg, 65%) as a colorless oil.

<sup>1</sup>H NMR (500 MHz,  $\text{CDCl}_3$ ): 4.13 (2 H, ddd,  $J = 12.0, 4.8, 1.9 \text{ Hz}$ ), 3.50–3.37 (3 H, m), 2.12 (2 H, ddq,  $J = 12.8, 4.2, 2.2 \text{ Hz}$ ), 1.99 (2 H, dtd,  $J = 13.1, 11.8, 4.7 \text{ Hz}$ ) ppm. – <sup>13</sup>C NMR (125 MHz,  $\text{CDCl}_3$ ): 66.3, 62.5, 26.4 ppm. – IR: 2933, 2855, 2133, 1732, 1449, 1361, 1306, 1240, 1195, 1155, 1108, 1083, 1023, 1008  $\text{cm}^{-1}$ . – HRMS: calcd for  $\text{C}_5\text{H}_{11}\text{N}_3\text{O}_3\text{S}$ : 192.0443, found 192.0438  $[\text{M}+\text{H}^+]$ .

### 4-Methyltetrahydro-2H-pyran-4-sulfonyl azide (**9j**)

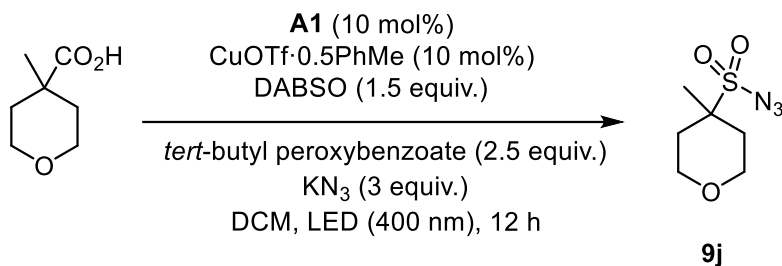

According to **GP3**, the reaction was carried out with 4-methyltetrahydro-2H-pyran-4-carboxylic acid (43 mg, 0.3 mmol), DABSO (108 mg, 0.45 mmol, 1.5 equiv.), acridine catalyst **A1** (9 mg, 0.03 mmol, 10 mol%), potassium azide (73 mg, 0.9 mmol, 3.0 equiv.), *tert*-butyl peroxybenzoate (145 mg, 0.75 mmol, 2.5 equiv.), CuOTf·0.5PhMe (8 mg, 0.03 mmol, 10 mol%) in degassed PhCF<sub>3</sub>/MeCN (3 mL, 3 : 1 v/v). The test-tube was capped, and the reaction mixture was irradiated with LED light ( $\lambda = 400$  nm) while stirring at room temperature for 12 h. The reaction mixture was treated with saturated solution of sodium carbonate (3 mL) and extracted with DCM (3 × 10 mL). The organic layer was collected, dried over anhydrous sodium sulfate, concentrated under reduced pressure, and the remaining material was purified by flash chromatography on silica gel (hexane/ethyl acetate 4 : 1 v/v) to give the sulfonyl azide product **9j** (31 mg, 50%) as a colorless oil.

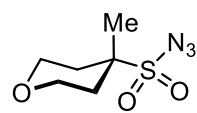
<sup>1</sup>H NMR (500 MHz, CDCl<sub>3</sub>): 4.00 (2 H, ddd,  $J = 12.1, 5.2, 2.5$  Hz), 3.56 (2 H, td,  $J = 11.8, 2.4$  Hz), 2.32 (2 H, ddd,  $J = 13.1, 11.3, 5.0$  Hz), 1.71 (2 H, dq,  $J = 13.2, 2.5$  Hz), 1.64 (3 H, s) ppm. – <sup>13</sup>C NMR (125 MHz, CDCl<sub>3</sub>): 65.7, 63.1, 30.9, 17.8 ppm. – IR: 2865, 2133, 1693, 1475, 1392, 1344, 1266, 1223, 1174, 1144, 1104, 1038, 1010 cm<sup>-1</sup>. – HRMS: calcd for C<sub>6</sub>H<sub>12</sub>N<sub>3</sub>O<sub>3</sub>S: 206.0599, found 206.0606 [M+H<sup>+</sup>].

## Heptane-4-sulfonyl azide (**9k**)

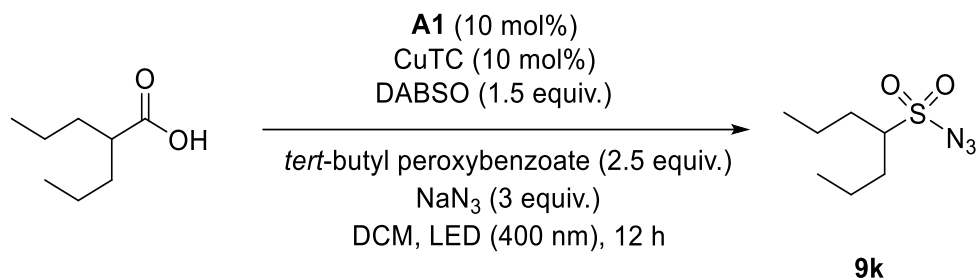

According to **GP3**, the reaction was carried out with 2-propylpentanoic acid (43 mg, 0.3

mmol), DABSO (108 mg, 0.45 mmol, 1.5 equiv.), acridine catalyst **A1** (9 mg, 0.03 mmol, 10 mol%), potassium azide (73 mg, 0.9 mmol, 3.0 equiv.), *tert*-butyl peroxybenzoate (145 mg, 0.75 mmol, 2.5 equiv.),

CuOTf·0.5PhMe (8 mg, 0.03 mmol, 10 mol%) in degassed dichloromethane (3 mL). The test-tube was capped, and the reaction mixture was irradiated with LED light ( $\lambda = 400$  nm) while stirring at room temperature for 12 h. The reaction mixture was treated with saturated solution of sodium carbonate (3 mL) and extracted with DCM ( $3 \times 10$  mL). The organic layer was collected, dried over anhydrous sodium sulfate, concentrated under reduced pressure, and the remaining material was purified by flash chromatography on silica gel (hexane/ ethyl acetate 9 : 1 v/v) to give the sulfonyl azide product **9k** (40 mg, 65%) as a colorless oil.

$^1\text{H}$  NMR (500 MHz, DMSO): 3.20 (1 H, tt,  $J = 7.0, 5.1$  Hz), 1.95 (2 H, dddd,  $J = 14.3, 10.1, 6.1, 5.1$  Hz), 1.74 (2 H, dddd,  $J = 14.3, 10.2, 7.0, 5.5$  Hz), 1.62–1.43 (4 H, m), 0.97 (6 H, t,  $J = 7.4$  Hz) ppm. –  $^{13}\text{C}$  NMR (125 MHz, DMSO): 66.8, 31.0, 20.0, 14.0 ppm. – IR: 3054, 3015, 2988, 2969, 2876, 2252, 2134, 1738, 1365, 1265, 1228, 1216, 1205, 908  $\text{cm}^{-1}$ . – HRMS: calcd for  $\text{C}_7\text{H}_{16}\text{N}_3\text{O}_2\text{S}$ : 206.0963, found 206.0961  $[\text{M}+\text{H}^+]$ .

**(3*R*,7*R*,8*R*,9*S*,10*S*,13*R*,14*S*,17*R*)-10,13-Dimethyl-17-((*R*)-4-(morpholinosulfonyl)butan-2-yl)hexadecahydro-1*H*-cyclopenta[*a*]phenanthrene-3,7-diyl diacetate (**10a**)**

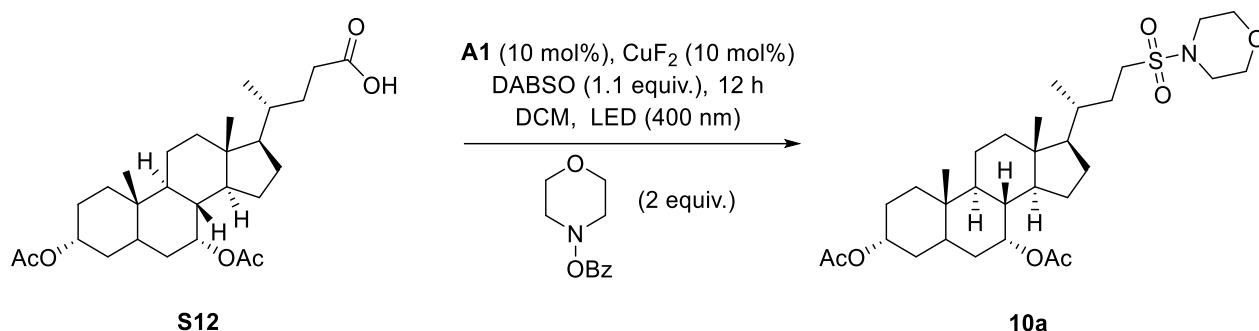

According to **GP1**, the reaction was carried out with **S12** (71 mg, 0.3 mmol), DABSO (40 mg, 0.165 mmol, 1.1 equiv.), *N*-(benzoyloxy)morpholine (62 mg, 0.3 mmol, 2 equiv.), acridine catalyst **A1** (5 mg, 0.015 mmol, 10 mol%), copper difluoride (1.5 mg, 0.015 mmol, 10 mol%), and degassed dichloromethane (6 mL). The test-tube was capped and the reaction mixture was irradiated with LED light ( $\lambda = 400$  nm) while stirring for 12 h. The reaction mixture was then quenched with saturated solution of sodium hydrogen carbonate (3 mL) and extracted with ethyl acetate (3  $\times$  10 mL). The organic layer was collected, dried over anhydrous sodium sulfate, concentrated under reduced pressure, and the remaining material was purified by flash chromatography on silica gel (hexane/ethyl acetate 2 : 3 v/v) to give the sulfone product **10a** (52 mg, 60%) as a colorless solid.

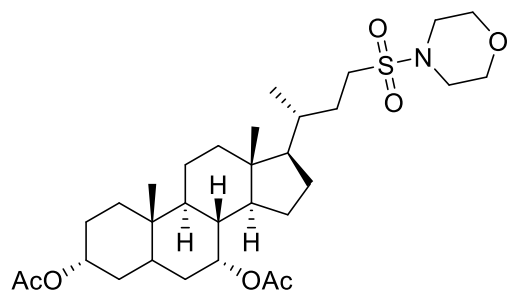

m.p.: 107–110 °C. –  $[\alpha]_D^{23} = +20.0$  (c 0.1, CHCl<sub>3</sub>). – <sup>1</sup>H NMR (500 MHz, CDCl<sub>3</sub>): 4.86 (1 H, q, *J* = 3.1 Hz), 4.57 (1 H, tt, *J* = 11.4, 4.5 Hz), 3.76–3.70 (4 H, m), 3.28–3.22 (4 H, m), 2.96 (1 H, ddd, *J* = 13.6, 11.8, 4.2 Hz), 2.81 (1 H, ddd, *J* = 13.5, 11.0, 4.9 Hz), 2.09–1.99 (7 H, m), 1.98–1.78 (5 H, m), 1.74–1.66 (1 H, m), 1.63–1.21 (12 H, m), 1.21–1.00 (4 H, m), 0.98–0.81 (7 H, m), 0.65 (3 H, s) ppm. – <sup>13</sup>C NMR (125 MHz, CDCl<sub>3</sub>): 170.7, 170.5, 74.2, 71.3, 66.8, 55.6, 50.5, 46.6, 46.0, 42.9, 41.0, 39.6, 38.0, 35.1, 35.0, 34.9, 34.7, 34.2, 31.7, 31.4, 28.9, 28.2, 26.9, 23.6, 22.8, 21.7, 21.6, 20.7, 18.5, 11.9 ppm. – IR: 2974, 2936, 2865, 1725, 1447, 1375,

1362, 1342, 1232, 1141, 1112, 1067, 1019. 848, 795, 731  $\text{cm}^{-1}$ . – HRMS: calcd for  $\text{C}_{31}\text{H}_{51}\text{NNaO}_7\text{S}$ : 604.3278, found 604.3283  $[\text{M}+\text{H}^+]$ .

### 15-(Morpholinosulfonyl)pentadecane-1,7,8-triyl triacetate (**10b**)

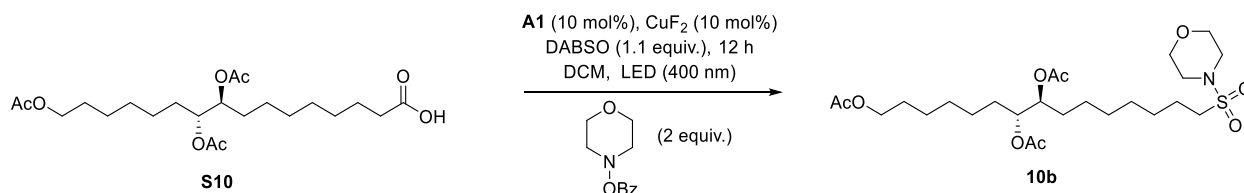

According to **GP1**, the reaction was carried out with acid **S10** (65 mg, 0.3 mmol), DABSO (40 mg, 0.165 mmol, 1.1 equiv.), *N*-(benzoyloxy)morpholine (62 mg, 0.3 mmol, 2 equiv.), acridine catalyst **A1** (5 mg, 0.015 mmol, 10 mol%), copper difluoride (1.5 mg, 0.015 mmol, 10 mol%), and degassed dichloromethane (6 mL). The test-tube was capped and the reaction mixture was irradiated with LED light ( $\lambda = 400 \text{ nm}$ ) while stirring for 12 h. The reaction mixture was then quenched with saturated solution of sodium hydrogen carbonate (3 mL) and extracted with ethyl acetate ( $3 \times 10 \text{ mL}$ ). The organic layer was collected, dried over anhydrous sodium sulfate, concentrated under reduced pressure, and the remaining material was purified by flash chromatography on silica gel (hexane/ethyl acetate 1 : 1 v/v) to give the sulfone product **10b** (52 mg, 65%) as a colorless liquid.

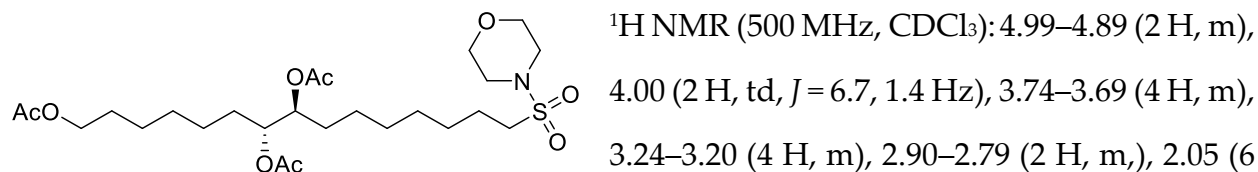

–  $^{13}\text{C}$  NMR (125 MHz,  $\text{CDCl}_3$ ): 171.2, 170.7, 73.7, 66.7, 64.5, 48.8, 45.9, 30.7, 29.1, 28.9, 28.5, 28.4, 25.8, 25.14, 25.11, 22.9, 21.1, 21.0 ppm. – IR: 3063, 3003, 2964, 2933, 1711, 1418, 1361, 1270, 1221, 1188, 1152, 1091, 961, 901, 736, 703  $\text{cm}^{-1}$ . – HRMS: calcd for  $\text{C}_{25}\text{H}_{45}\text{NNaO}_9\text{S}$ : 558.2707, found 558.2719  $[\text{M}+\text{H}^+]$ .



**(1*S*,2*S*,4*aR*,4*bR*,7*S*,9*aS*,10*S*,10*aR*)-1-Methyl-8-methylene-10-(morpholinosulfonyl)-13-oxo-1,2,5,6,8,9,10,10*a*-octahydro-4*a*,1-(epoxymethano)-7,9*a*-methanobenzo[*a*]azulene-2,7(4*bH*)-diyl diacetate (10c)**

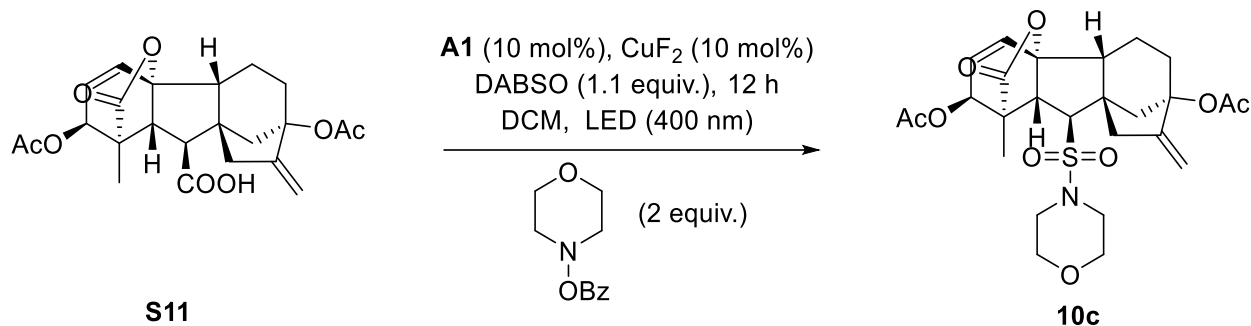

According to **GP1**, the reaction was carried out with **S11** (71 mg, 0.3 mmol), DABSO (40 mg, 0.165 mmol, 1.1 equiv.), *N*-(benzoyloxy)morpholine (62 mg, 0.3 mmol, 2 equiv.), acridine catalyst **A1** (5 mg, 0.015 mmol, 10 mol%), copper difluoride (1.5 mg, 0.015 mmol, 10 mol%), and degassed dichloromethane (6 mL). The test-tube was capped and the reaction mixture was irradiated with LED light ( $\lambda = 400$  nm) while stirring for 12 h. The reaction mixture was then quenched with saturated solution of sodium hydrogen carbonate (3 mL) and extracted with ethyl acetate (3  $\times$  10 mL). The organic layer was collected, dried over anhydrous sodium sulfate, concentrated under reduced pressure, and the remaining material was purified by flash chromatography on silica gel (hexane/ethyl acetate 1 : 4 v/v) to give the sulfone product **10c** (72 mg, 89%) as a colorless solid.

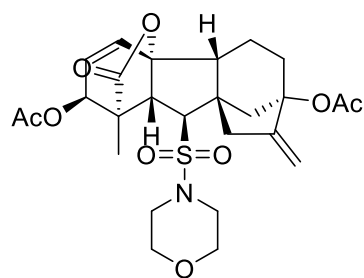

m.p.: 157–160 °C. –  $[\alpha]_D^{23} = +81.8$  (c 0.55, CHCl<sub>3</sub>). – <sup>1</sup>H NMR (500 MHz, CDCl<sub>3</sub>): 6.45 (1 H, d, *J* = 9.3 Hz), 5.87 (1 H, dd, *J* = 9.2, 3.7 Hz), 5.41 (1 H, d, *J* = 3.7 Hz), 5.07 (1 H, d, *J* = 2.8 Hz), 5.00 (1 H, dd, *J* = 3.4, 1.5 Hz), 3.87–3.62 (5 H, m), 3.43–3.26 (5 H, m), 3.26–3.19 (2 H, m), 2.79 (1 H, s), 2.63–2.53 (2 H, m), 2.22

(1 H, dd, *J* = 10.3, 3.1 Hz), 2.17–2.08 (4 H, m), 2.04–1.93 (4 H, m), 1.72 (1 H, ddt, *J* = 12.1, 6.2, 2.8 Hz), 1.33 (3 H, s) ppm. – <sup>13</sup>C NMR (125 MHz, CDCl<sub>3</sub>): 176.7, 169.8, 169.6, 149.5, 133.9, 129.5, 106.4, 90.1, 83.9, 71.8, 67.0, 66.4, 64.8, 54.0, 52.3, 52.1, 47.1, 46.4, 46.0, 45.0, 41.5,

36.3, 22.2, 21.0, 17.9, 15.3 ppm. – IR: 2957, 2921, 2867, 2850, 1652, 1455, 1408, 1361, 1334, 1260, 1240, 1161, 1128, 1107, 1073, 945, 913, 873, 802, 785, 770, 710  $\text{cm}^{-1}$ . – HRMS: calcd for  $\text{C}_{26}\text{H}_{33}\text{NNaO}_9\text{S}$ : 558.1768, found 558.1767  $[\text{M}+\text{Na}^+]$ .

***N*-(4-(3-Ethyl-2,6-dioxopiperidin-3-yl)phenyl)-4-oxo-4-phenylbutane-1-sulfonamide (10d)**

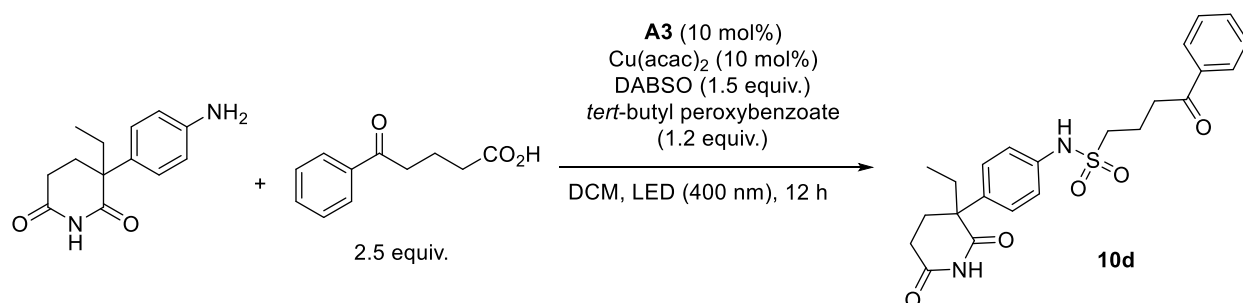

According to **GP2**, the reaction was carried out with DL-aminoglutethimide (70 mg, 0.3 mmol), 5-oxo-5-phenylpentanoic acid (144 mg, 0.75 mmol, 2.5 equiv.), DABSO (108 mg, 0.45 mmol, 1.5 equiv.), acridine **A3** (9 mg, 0.03 mmol, 10 mol%), *tert*-butyl peroxybenzoate (87 mg, 0.45 mmol, 1.5 equiv.),  $\text{Cu}(\text{acac})_2$  (8 mg, 0.03 mmol, 10 mol%) in degassed dichloromethane (3 mL). The test-tube was capped and the reaction mixture was irradiated with LED light ( $\lambda = 400 \text{ nm}$ ) while stirring for 12 h. The reaction mixture was then quenched with saturated solution of sodium hydrogen carbonate (3 mL), extracted with ethyl acetate ( $3 \times 10 \text{ mL}$ ). The organic layer was collected, dried over anhydrous sodium sulfate, concentrated under reduced pressure, and the remaining material was purified by flash chromatography on silica gel (DCM/ MeOH 19 : 1 v/v) to give the sulfonamide **10d** (81 mg, 61%) as a white solid. ·

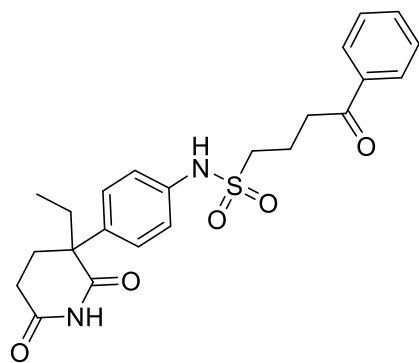

m.p.: 135–137 °C. –  $^1\text{H}$  NMR (500 MHz,  $\text{CDCl}_3$ , rotamers): 8.94–8.61 (1 H, m), 7.94 (2 H, dt,  $J = 8.3, 1.5$  Hz), 7.56 (1 H, td,  $J = 7.2, 1.4$  Hz), 7.45 (2 H, td,  $J = 7.9, 1.6$  Hz), 7.31–7.19 (1 H, m), 7.15–7.07 (2 H, m), 7.04–6.97 (2 H, m), 3.25–3.04 (4 H, m), 2.62–2.51 (1 H, m), 2.46–2.11 (5 H, m), 2.06–1.93 (1 H, m), 1.92–1.77 (1 H, m), 0.94–0.78 (3 H, m) ppm. –  $^{13}\text{C}$

NMR (125 MHz,  $\text{CDCl}_3$ , rotamers): 198.8, 175.7, 175.5, 172.9, 172.7, 140.9, 136.6, 133.7, 133.5, 133.4, 128.8, 128.1, 127.5, 119.0, 118.7, 54.98, 54.95, 50.7, 50.6, 36.8, 33.0, 32.9, 29.41, 29.37, 27.3, 27.0, 17.8, 9.2, 9.1 ppm. – IR: 3224, 2926, 1683, 1597, 1514, 1494, 1449, 1409, 1353, 1269, 1223, 1189, 1151, 1038  $\text{cm}^{-1}$ . – HRMS: calcd for  $\text{C}_{23}\text{H}_{26}\text{N}_2\text{O}_5\text{SNa}$ : 465.1455, found 465.1417  $[\text{M}+\text{Na}^+]$ .

### Benzyl (S)-4-(azidosulfonyl)-2-(((benzyloxy)carbonyl)amino)butanoate (10e)

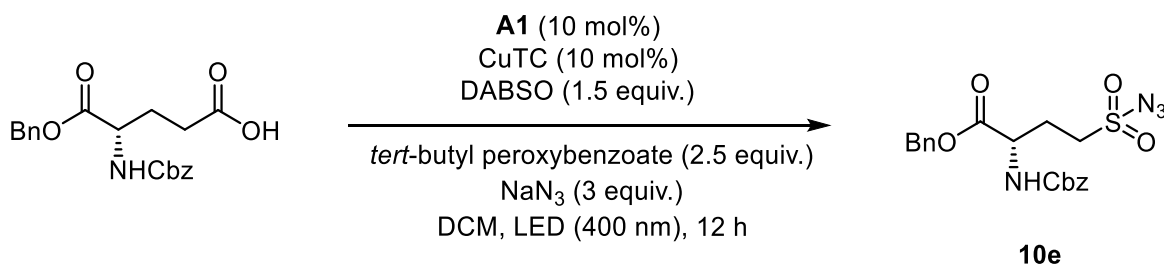

According to **GP3**, the reaction was carried out with (S)-5-(benzyloxy)-4-(((benzyloxy)carbonyl)amino)-5-oxopentanoic acid (111 mg, 0.3 mmol), DABSO (108 mg, 0.45 mmol, 1.5 equiv.), acridine catalyst **A1** (9 mg, 0.03 mmol, 10 mol%), sodium azide (59 mg, 0.9 mmol, 3.0 equiv.), *tert*-butyl peroxybenzoate (145 mg, 0.75 mmol, 2.5 equiv.), copper(I) thiophene-2-carboxylate (5 mg, 0.03 mmol, 10 mol%) in degassed  $\text{PhCF}_3/\text{MeCN}$  (3 mL, 3 : 1 v/v). The test-tube was capped, and the reaction mixture was irradiated with LED light ( $\lambda = 400$  nm) while stirring at room temperature for 12 h. The reaction mixture was treated with saturated solution of sodium carbonate (3 mL) and extracted with DCM

(3 × 10 mL). The organic layer was collected, dried over anhydrous sodium sulfate, concentrated under reduced pressure, and the remaining material was purified by flash chromatography on silica gel (hexane/ ethyl acetate 4 : 1 v/v) to give the sulfonyl azide product **10e** (74 mg, 57%) as a colorless oil.

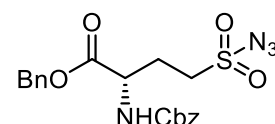 m.p.: 55–77°C. –  $[\alpha]_D^{23} = +6.8$  (c 0.22, CHCl<sub>3</sub>). – <sup>1</sup>H NMR (500 MHz, CDCl<sub>3</sub>): 7.42–7.30 (10 H, m), 5.55 (1 H, d, *J* = 7.7 Hz), 5.26–5.15 (2 H, m), 5.11 (2 H, s), 4.53 (1 H, q, *J* = 7.1 Hz), 3.40 (1 H, ddd, *J* = 15.9, 10.9, 5.2 Hz), 3.26 (1 H, ddd, *J* = 15.0, 11.2, 4.9 Hz), 2.51 (1 H, td, *J* = 10.7, 5.9 Hz), 2.24 (1 H, dddd, *J* = 13.6, 10.8, 8.0, 4.9 Hz) ppm. – <sup>13</sup>C NMR (125 MHz, CDCl<sub>3</sub>): 170.5, 156.1, 135.9, 134.7, 129.0, 128.9, 128.8, 128.7, 128.6, 128.3, 68.2, 67.6, 52.4, 52.1, 27.0 ppm. – IR: 3032, 3011, 2964, 2140, 1764, 1708, 1421, 1360, 1220, 1092, 929, 793, 735 cm<sup>–1</sup>. – HRMS: calcd for C<sub>19</sub>H<sub>20</sub>N<sub>4</sub>NaO<sub>6</sub>S: 455.0996, found 455.0999 [M+Na<sup>+</sup>].

**((3a*S*,5a*R*,8a*R*,8b*S*)-2,2,7,7-Tetramethyltetrahydro-3a*H*-  
bis([1,3]dioxolo)[4,5-*b*:4',5'-*d*]pyran-3a-yl)methyl 4-  
(azidosulfonyl)butanoate (**10f**)**

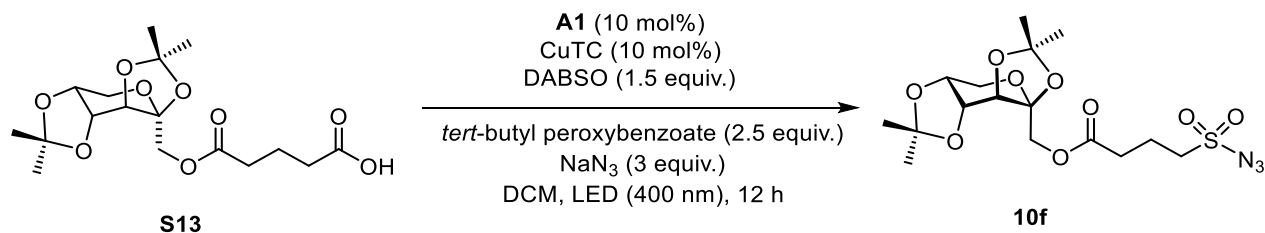

According to **GP3**, the reaction was carried out with acid **S13** (112 mg, 0.3 mmol), DABSO (108 mg, 0.45 mmol, 1.5 equiv.), acridine catalyst **A1** (9 mg, 0.03 mmol, 10 mol%), sodium azide (59 mg, 0.9 mmol, 3.0 equiv.), *tert*-butyl peroxybenzoate (145 mg, 0.75 mmol, 2.5 equiv.), copper(I) thiophene-2-carboxylate (5 mg, 0.03 mmol, 10 mol%) in degassed PhCF<sub>3</sub>/MeCN (3 mL, 3 : 1 v/v). The test-tube was capped, and the reaction mixture was irradiated with LED light ( $\lambda$  = 400 nm) while stirring at room temperature for 12 h. The

reaction mixture was treated with saturated solution of sodium carbonate (3 mL) and extracted with DCM (3 × 10 mL). The organic layer was collected, dried over anhydrous sodium sulfate, concentrated under reduced pressure, and the remaining material was purified by flash chromatography on silica gel (hexane/ ethyl acetate 4 : 1 v/v) to give the sulfonyl azide product **10f** (74 mg, 57%) as a colorless oil.

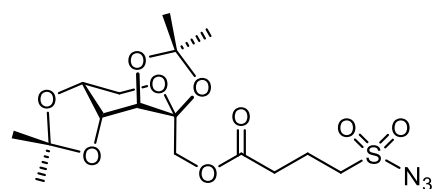

$[\alpha]_D^{23} = -20.0$  (c 0.4,  $\text{CHCl}_3$ ).  $^1\text{H}$  NMR (500 MHz,  $\text{CDCl}_3$ ): 4.59 (1 H, dq,  $J = 8.3, 2.7$  Hz), 4.44 (1 H, dd,  $J = 11.6, 6.2$  Hz), 4.24 (2 H, ddd,  $J = 14.2, 7.1, 4.3$  Hz), 4.06 (1 H, dd,  $J = 11.6, 6.2$  Hz), 3.88 (1 H, ddd,  $J = 13.0, 6.2, 2.1$  Hz), 3.75 (1 H, dd,  $J = 13.1, 5.8$  Hz), 3.45 (2 H, dt,  $J = 8.3, 6.0$  Hz), 2.60 (2 H, q,  $J = 6.6$  Hz), 2.23 (2 H, hex,  $J = 6.9$  Hz), 1.53 (3 H, d,  $J = 5.6$  Hz), 1.47 (3 H, d,  $J = 5.9$  Hz), 1.38 (2 H, d,  $J = 5.7$  Hz), 1.33 (2 H, d,  $J = 5.5$  Hz) ppm.  $^{13}\text{C}$  NMR (125 MHz,  $\text{CDCl}_3$ ): 171.3, 109.3, 109.0, 101.5, 70.8, 70.1, 66.0, 61.4, 54.7, 31.6, 26.6, 26.0, 25.3, 24.2, 19.0 ppm. – IR: 3428, 3014, 2334, 2145, 1743, 1657, 1364, 1267, 1214, 911, 744  $\text{cm}^{-1}$ . – HRMS: calcd for  $\text{C}_{16}\text{H}_{25}\text{N}_3\text{NaO}_9\text{S}$ : 458.1204, found 458.1200  $[\text{M}+\text{Na}^+]$ .

**(1S,2S,4aR,4bR,7S,9aS,10S,10aR)-10-(Azidosulfonyl)-1-methyl-8-methylene-13-oxo-1,2,5,6,8,9,10,10a-octahydro-4a,1-(epoxymethano)-7,9a-methanobenzo[*a*]azulene-2,7(4b*H*)-diyl diacetate (**10g**)**

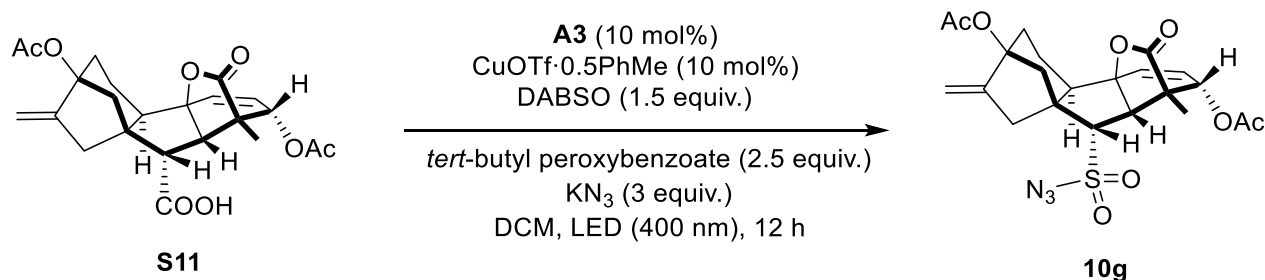

According to **GP3**, the reaction was carried out with acid **S11** (129 mg, 0.3 mmol), DABSO (108 mg, 0.45 mmol, 1.5 equiv.), acridine catalyst **A3** (9 mg, 0.03 mmol, 10 mol%), potassium azide (73 mg, 0.9 mmol, 3.0 equiv.), *tert*-butyl peroxybenzoate (145 mg, 0.75

mmol, 2.5 equiv.), CuOTf·0.5PhMe (8 mg, 0.03 mmol, 10 mol%) in degassed PhCF<sub>3</sub>/MeCN (3 mL, 3 : 1 v/v). The test-tube was capped, and the reaction mixture was irradiated with LED light ( $\lambda$  = 400 nm) while stirring at room temperature for 12 h. The reaction mixture was treated with saturated solution of sodium carbonate (3 mL) and extracted with DCM (3 × 10 mL). The organic layer was collected, dried over anhydrous sodium sulfate, concentrated under reduced pressure, and the remaining material was purified by flash chromatography on silica gel (hexane/ ethyl acetate 4 : 1 v/v) to give the sulfonyl azide product **10g** (102 mg, 69%) as a colorless oil.

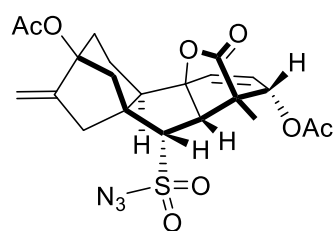

$[\alpha]_D^{23} = -20.0$  (c 0.4, CHCl<sub>3</sub>). – <sup>1</sup>H NMR (500 MHz, CDCl<sub>3</sub>): 6.46 (1 H, d, *J* = 9.3 Hz), 5.89 (1 H, dd, *J* = 9.3, 3.7 Hz), 5.42 (1 H, d, *J* = 3.6 Hz), 5.12–5.05 (1 H, m), 5.04 (1 H, dd, *J* = 3.5, 1.6 Hz), 3.58 (1 H, d, *J* = 7.4 Hz), 3.42 (1 H, dt, *J* = 15.7, 3.1 Hz), 3.33 (1 H, d, *J* =

7.4 Hz), 2.66–2.53 (2 H, m), 2.33 (1 H, dd, *J* = 10.5, 3.1 Hz), 2.20–2.08 (5 H, m), 2.03–1.88 (5 H, m), 1.73 (1 H, ddt, *J* = 12.1, 7.4, 2.6 Hz), 1.39 (3 H, s) ppm. – <sup>13</sup>C NMR (125 MHz, CDCl<sub>3</sub>): 175.9, 169.9, 169.5, 148.7, 133.6, 129.7, 107.2, 89.8, 83.7, 71.5, 69.8, 54.8, 52.6, 51.9, 47.4, 44.8, 41.4, 36.0, 22.1, 20.8, 17.8, 14.9 ppm. – IR: 2974, 2878, 2136, 1780, 1736, 1710, 1463, 1364, 1221, 1157, 1088, 1022, 911, 732 cm<sup>-1</sup>. – HRMS: calcd for C<sub>22</sub>H<sub>25</sub>N<sub>3</sub>NaO<sub>8</sub>S: 514.1255, found 514.1250 [M+Na<sup>+</sup>].

### ((1*S*,3*R*)-3-Acetyl-2,2-dimethylcyclobutyl)methanesulfonyl azide (**10h**)

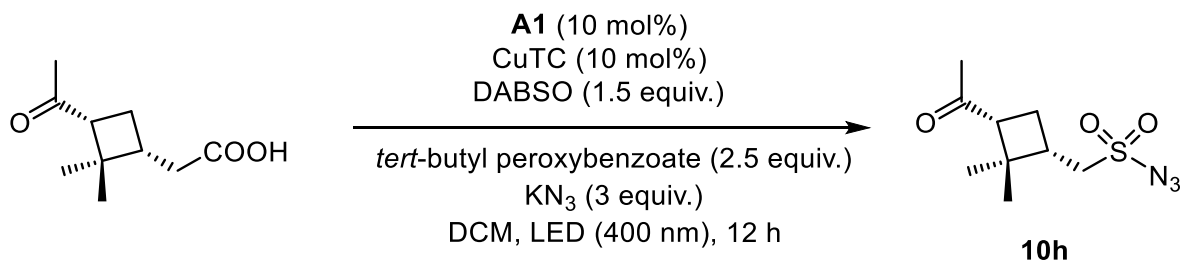

According to **GP3**, the reaction was carried out with 2-((1*R*,3*R*)-3-acetyl-2,2-dimethylcyclobutyl)acetic acid (55 mg, 0.3 mmol), DABSO (108 mg, 0.45 mmol, 1.5

equiv.), acridine catalyst **A1** (9 mg, 0.03 mmol, 10 mol%), potassium azide (73 mg, 0.9 mmol, 3.0 equiv.), *tert*-butyl peroxybenzoate (145 mg, 0.75 mmol, 2.5 equiv.), copper(I) thiophene-2-carboxylate (5 mg, 0.03 mmol, 10 mol%) in degassed PhCF<sub>3</sub>/MeCN (3 mL, 3 : 1 v/v). The test-tube was capped, and the reaction mixture was irradiated with LED light ( $\lambda = 400$  nm) while stirring at room temperature for 12 h. The reaction mixture was treated with saturated solution of sodium carbonate (3 mL) and extracted with DCM (3  $\times$  10 mL). The organic layer was collected, dried over anhydrous sodium sulfate, concentrated under reduced pressure, and the remaining material was purified by flash chromatography on silica gel (hexane/ ethyl acetate 4 : 1 v/v) to give the sulfonyl azide product **10h** (53 mg, 72%) as a colorless oil.

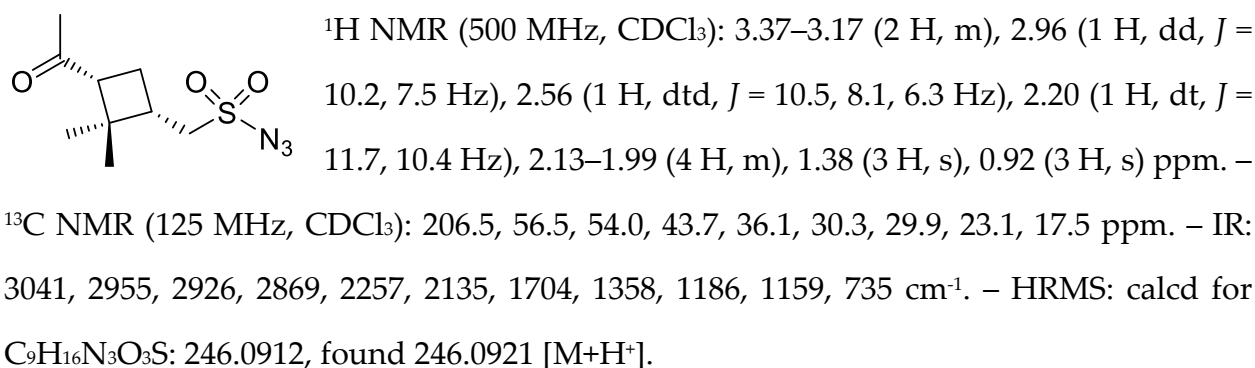

**(3*R*,7*R*,8*R*,9*S*,10*S*,12*S*,13*R*,14*S*,17*R*)-17-((*R*)-4-(Azidosulfonyl)butan-2-yl)-10,13-dimethylhexadecahydro-1*H*-cyclopenta[*a*]phenanthrene-3,7,12-triyl triacetate (**10i**)**

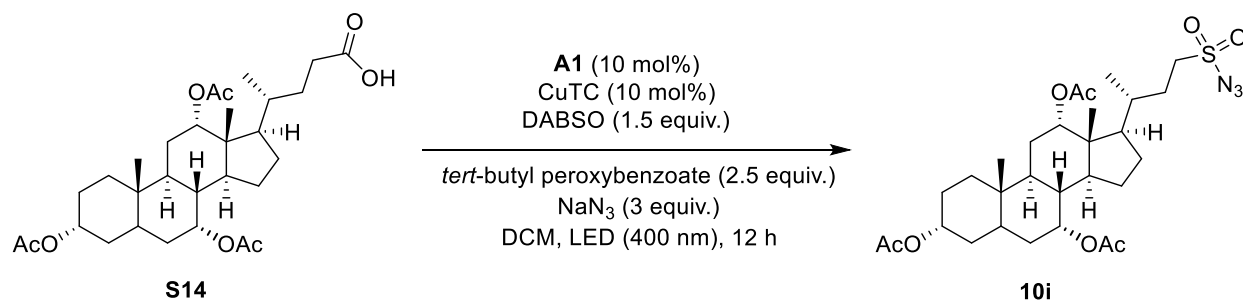

According to **GP3**, the reaction was carried out with acid **S14** (80 mg, 0.15 mmol), DABSO (54 mg, 0.23 mmol, 1.5 equiv.), acridine catalyst **A1** (4.5 mg, 0.015 mmol, 10 mol%), sodium azide (30 mg, 0.45 mmol, 3.0 equiv.), *tert*-butyl peroxybenzoate (73 mg, 0.37 mmol, 2.5 equiv.), copper(I) thiophene-2-carboxylate (5 mg, 0.03 mmol, 10 mol%) in degassed PhCF<sub>3</sub>/MeCN (3 mL, 3 : 1 v/v). The test-tube was capped, and the reaction mixture was irradiated with LED light ( $\lambda = 400$  nm) while stirring at room temperature for 12 h. The reaction mixture was treated with saturated solution of sodium carbonate (3 mL) and extracted with DCM (3  $\times$  10 mL). The organic layer was collected, dried over anhydrous sodium sulfate, concentrated under reduced pressure, and the remaining material was purified by flash chromatography on silica gel (hexane/ ethyl acetate 4 : 1 v/v) to give the sulfonyl azide product **10i** (110 mg, 62%) as a colorless solid.

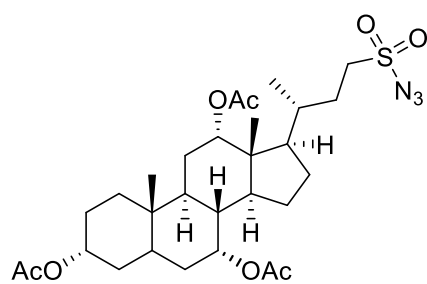

m.p.: 75–77 °C. –  $[\alpha]_D^{23} = +23.3$  (c 0.14, CHCl<sub>3</sub>). – <sup>1</sup>H NMR (500 MHz, CDCl<sub>3</sub>): 5.08 (1 H, t, *J* = 2.9 Hz), 4.92 (1 H, q, *J* = 3.1 Hz), 4.58 (1 H, tt, *J* = 11.4, 4.3 Hz), 3.36 (1 H, ddd, *J* = 14.0, 11.5, 4.4 Hz), 3.21 (1 H, ddd, *J* = 14.0, 11.0, 5.0 Hz), 2.15 (3 H, s), 2.12–1.84 (10 H, m), 1.83–1.41 (13 H, m), 1.39–1.02 (5 H, m), 0.99–0.82 (6 H, m), 0.76 (3 H, s) ppm. – <sup>13</sup>C NMR (125 MHz, CDCl<sub>3</sub>): 170.6, 170.5, 170.4, 75.3, 74.1, 70.7, 53.6, 47.3, 45.3, 43.5, 41.0, 37.9, 34.8, 34.7, 34.4, 34.2, 31.3, 29.2, 29.0, 27.3, 27.0, 25.7, 22.9, 22.7, 21.7, 21.59, 21.55, 17.7, 12.4 ppm. – IR: 2948, 2111, 1714, 1653, 1510, 1474, 1241, 1056, 801 cm<sup>-1</sup>. – HRMS: calcd for C<sub>29</sub>H<sub>45</sub>N<sub>3</sub>NaO<sub>8</sub>S: 618.2820, found 618.2816 [M+H<sup>+</sup>].

### 15-(Azidosulfonyl)pentadecane-1,7,8-triyl triacetate (**10j**)

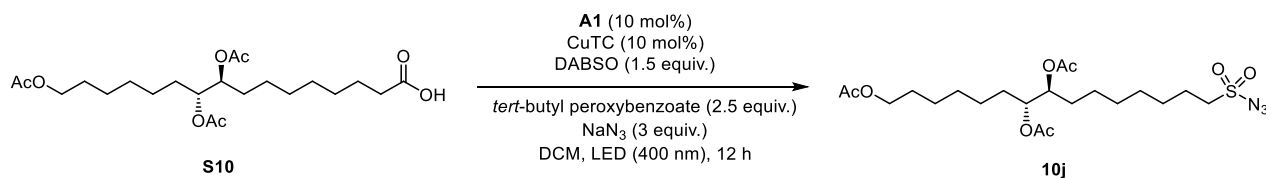



According to **GP3**, the reaction was carried out with acid **S10** (65 mg, 0.15 mmol), DABSO (54 mg, 0.23 mmol, 1.5 equiv.), acridine catalyst **A1** (4.5 mg, 0.015 mmol, 10 mol%), sodium azide (30 mg, 0.45 mmol, 3.0 equiv.), *tert*-butyl peroxybenzoate (73 mg, 0.37 mmol, 2.5 equiv.), copper(I) thiophene-2-carboxylate (5 mg, 0.03 mmol, 10 mol%) in degassed PhCF<sub>3</sub>/MeCN (3 mL, 3 : 1 v/v). The test-tube was capped, and the reaction mixture was irradiated with LED light ( $\lambda$  = 400 nm) while stirring at room temperature for 12 h. The reaction mixture was treated with saturated solution of sodium carbonate (3 mL) and extracted with DCM (3 × 10 mL). The organic layer was collected, dried over anhydrous sodium sulfate, concentrated under reduced pressure, and the remaining material was purified by flash chromatography on silica gel (hexane/ ethyl acetate 4 : 1 v/v) to give the sulfonyl azide product **10j** (38 mg, 52%) as a colorless oil.

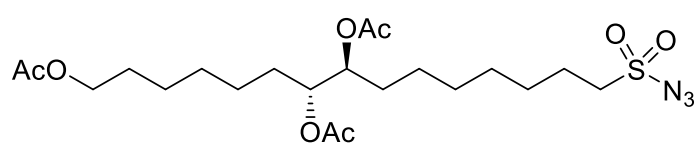

<sup>1</sup>H NMR (500 MHz, CDCl<sub>3</sub>): 5.01–4.93 (2 H, m), 4.02 (2 H, t, *J* = 6.7 Hz), 3.32–3.25 (2 H, m), 2.07 (6 H, s), 2.02 (3 H, s), 1.88 (2 H, p, *J* = 7.7 Hz), 1.63–1.37 (8 H, m), 1.37–1.24 (12 H, m) ppm. – <sup>13</sup>C NMR (125 MHz, CDCl<sub>3</sub>): 171.3, 170.7, 73.8, 64.5, 56.0, 30.8, 30.8, 29.1, 29.0, 28.8, 28.6, 27.9, 25.8, 25.2, 25.1, 23.4, 21.1, 21.0 ppm. – IR: 3647, 2936, 2136, 1738, 1369, 1239, 1160, 1026 cm<sup>-1</sup>. – HRMS: calcd for C<sub>21</sub>H<sub>37</sub>N<sub>3</sub>O<sub>8</sub>SNa: 514.2194, found 514.2186 [M+Na<sup>+</sup>].

## Computational Data

### Software

All geometry optimizations, vertical excitations, vibrational frequency calculations, and IRCs were conducted using the Gaussian 16 program.<sup>10</sup> Quantum chemical calculations were performed using the Stampede2 supercomputer at the Texas Advanced Computing Center (TACC) hosted by the University of Texas in Austin, Texas.<sup>11</sup> The CREST utility<sup>12</sup> of the xTB software suite<sup>13,14</sup> was used in conjunction with manual conformational searching to locate initial starting geometries for optimization via DFT. General day-to-day visualization and monitoring of calculations was performed with Chemcraft.<sup>15</sup> The quasi-harmonic approximation from Grimme<sup>16</sup> was applied via GoodVibes<sup>17</sup> to all structures to correct for potential errors associated with low magnitude vibrational frequencies using a cut-off frequency of 50 cm<sup>-1</sup>. Final images of minima and transition state geometries were rendered using CYLview.<sup>18</sup> Spin density images were generated from the optimized .chk files (converted to .fch) with the Gaussian Cubegen utility (with spin=SCF and npts = 300). VMD<sup>19</sup> was used to render the final images from the generated .cube files with a green isosurface and an isovalue of 0.03 au for all radical species.

### Details of Gaussian DFT calculations

Geometries of ground state minima and transition states were optimized without constraints using the D3(BJ)<sup>20,21</sup> dispersion-corrected PW6B95<sup>22</sup> DFA. The PW6B95-D3(BJ) DFA was selected on the basis of its excellent general performance in both thermochemical and NCI benchmarking studies.<sup>23</sup> DFT calculations were performed using the def2-TZVP<sup>24</sup> basis set in the SMD solvation model<sup>25</sup> using the “dichloromethane” keyword. Convergence criteria for these calculations was set to “tight” and an ultrafine grid was selected. Frequency calculations at the same level of

theory were used to confirm the nature of the isolated stationary points. Geometries with zero imaginary frequencies were deemed minima whereas those with exactly one imaginary frequency along the chemical path of interest were deemed transition states. IRC calculations were performed to further corroborate that the located transition states connected reactants to products. Single point calculations were performed at the def2-TZVP-optimized stationary points at the PW6B95-D3(BJ) / def2-TZVPPD / SMD (DCM) level of theory. The electronic energy calculated at the def2-TZVPPD level replaced that calculated at the def2-TZVP level and is reported in the final calculated thermodynamic values. The def2-TZVPPD basis set was implemented in G16 by appending diffuse functions obtained from the EMSL BSE<sup>26</sup> to the G16-available def2-TZVPP basis set.

#### 4. Calculation of Reduction Potential of HA1<sup>+</sup>/HA1

The standard potential of the HA<sup>+</sup>/HA redox couple was calculated at the PW6B95-D3(BJ) / def2-TZVP // def2-TZVPPD / SMD (MeCN) level of theory relative to the absolute hydrogen potential in MeCN (4.43 V vs SCE).<sup>27</sup>

##### HA1<sup>+</sup> (MeCN)

E(RPW6B95D3) = -1248.42706771

Charge = 1      Multiplicity = 1

|   |               |               |               |
|---|---------------|---------------|---------------|
| C | -7.9418585362 | -1.3235911305 | -0.7662815109 |
| C | -6.8099935092 | -1.7880630874 | -0.1683675303 |
| C | -5.7553462106 | -0.8972552283 | 0.0775471654  |
| C | -5.8575341068 | 0.4718253461  | -0.2795137085 |
| C | -7.0505630163 | 0.9047916643  | -0.9090507387 |
| C | -8.0632731981 | 0.0299230088  | -1.1438092199 |
| C | -4.7784433498 | 1.323031213   | -0.0125994616 |

|    |               |               |               |
|----|---------------|---------------|---------------|
| C  | -3.6197697224 | 0.8206836395  | 0.5931005449  |
| C  | -3.5605915665 | -0.5564502907 | 0.9236964259  |
| C  | -2.418825345  | -1.106062717  | 1.5251040254  |
| H  | -2.4042928695 | -2.1584736009 | 1.7622755298  |
| C  | -1.3582230232 | -0.2955909095 | 1.7934125796  |
| C  | -1.3956418221 | 1.0797912533  | 1.4822607975  |
| C  | -2.4955915035 | 1.625080683   | 0.900556561   |
| H  | -8.7575197402 | -2.0020558751 | -0.9599371333 |
| H  | -6.7027809366 | -2.8223782726 | 0.1184295574  |
| H  | -7.1389709476 | 1.9372365436  | -1.2027552287 |
| H  | -8.9672031126 | 0.3659629733  | -1.6253142252 |
| H  | -0.4758918205 | -0.7097219461 | 2.2550015612  |
| H  | -0.5431258743 | 1.6976962055  | 1.7130935557  |
| H  | -2.5279652204 | 2.6770705941  | 0.6693273185  |
| N  | -4.6229908711 | -1.3346489432 | 0.653918827   |
| C  | -4.8736092634 | 2.7591803007  | -0.3493731614 |
| C  | -4.1956699339 | 3.3089248796  | -1.4297039579 |
| C  | -5.6599118172 | 3.5980818926  | 0.4318738382  |
| C  | -4.2868114248 | 4.6551206542  | -1.727854417  |
| C  | -5.7522500337 | 4.9468217254  | 0.1482959831  |
| H  | -6.1939055253 | 3.1790967295  | 1.2704434256  |
| C  | -5.0651408529 | 5.4740613336  | -0.9314192232 |
| H  | -3.7546907691 | 5.0523802708  | -2.5766735174 |
| H  | -6.361929765  | 5.5835130949  | 0.7691774238  |
| H  | -5.134807222  | 6.5254584304  | -1.1614508001 |
| Cl | -3.2300552513 | 2.2920804794  | -2.4506623806 |
| H  | -4.5655083431 | -2.31548848   | 0.8992554125  |

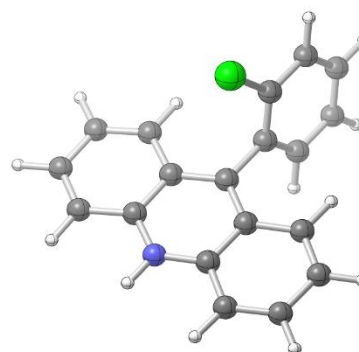

# HA1 (MeCN)

E(UPW6B95D3) = -1248.56334669

Charge = 0      Multiplicity = 2

|   |               |               |               |
|---|---------------|---------------|---------------|
| C | -7.9997188128 | -1.3146341236 | -0.7522645474 |
| C | -6.8396255511 | -1.7706163625 | -0.1566789414 |
| C | -5.7843471678 | -0.8983740306 | 0.077024311   |
| C | -5.8759433836 | 0.4691296437  | -0.2794341948 |
| C | -7.0678700471 | 0.8923985634  | -0.8948741759 |
| C | -8.1092673621 | 0.0210935784  | -1.1248920097 |
| C | -4.7728531576 | 1.3257674102  | -0.0242746304 |
| C | -3.599296355  | 0.8085056021  | 0.5849731395  |
| C | -3.5434913713 | -0.564926179  | 0.9209921744  |
| C | -2.4125738759 | -1.1103158586 | 1.5155621036  |
| H | -2.4049193278 | -2.163587951  | 1.7550195926  |
| C | -1.3209566969 | -0.311390867  | 1.7948738937  |
| C | -1.3557751666 | 1.0444777211  | 1.4848945052  |
| C | -2.4730777592 | 1.5910779734  | 0.8943942013  |
| H | -8.8144239108 | -1.9989278466 | -0.9301336574 |
| H | -6.7349703755 | -2.8060468985 | 0.1322848249  |
| H | -7.1588671785 | 1.9243213262  | -1.19380791   |
| H | -9.0105558885 | 0.3777412725  | -1.5988239771 |
| H | -0.4464921653 | -0.7425922249 | 2.2564537652  |
| H | -0.5067756259 | 1.6716932915  | 1.7083834341  |
| H | -2.4935831412 | 2.6441163194  | 0.6613463199  |
| N | -4.6305121463 | -1.3509195513 | 0.6545240111  |

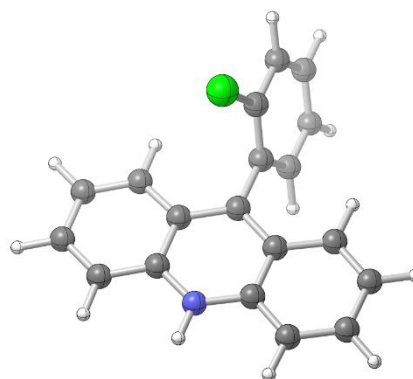

|    |               |               |               |
|----|---------------|---------------|---------------|
| C  | -4.8631724031 | 2.7587431658  | -0.3583541686 |
| C  | -4.1442219563 | 3.3382603742  | -1.3997818231 |
| C  | -5.6950486175 | 3.5991979544  | 0.3790779378  |
| C  | -4.227847663  | 4.6876363216  | -1.6917965828 |
| C  | -5.7940609602 | 4.9488136534  | 0.100944701   |
| H  | -6.266701741  | 3.1711928222  | 1.1885925893  |
| C  | -5.0557010125 | 5.4954506082  | -0.9353527325 |
| H  | -3.6534590749 | 5.0954035331  | -2.5077775419 |
| H  | -6.4433085073 | 5.5733187975  | 0.6943742814  |
| H  | -5.1231283748 | 6.5482109861  | -1.1607443839 |
| Cl | -3.1186886149 | 2.3485000398  | -2.3944003108 |
| H  | -4.5781529374 | -2.3260628851 | 0.8999770519  |

## 5. Calculation of the $pK_{BH^+}$ of the lowest singlet excited state of acridine

The ground electronic states of acridinium cation, **AcrH<sup>+</sup>**, and acridine, **Acr**, were optimized without constraints at the PW6B95-D3(BJ) / def2-TZVP / SMD (MeCN) level of theory. TD-DFT calculations were employed to optimize the first singlet excited state of both acridinium cation, **AcrH<sup>+</sup>\***, and acridine, **Acr<sup>\*</sup>**. Frequency calculations at the same level of theory confirmed the nature of the isolated stationary points.

The Förster equation was used<sup>28</sup> to estimate the  $pK_{BH^+}^*$  of the first singlet excited state of acridine according to equation 1:

$$pK_{BH^+}^* = pK_{BH^+} - (hv_1 - hv_2)/2.3RT \quad (1)$$

where  $pK_{BH^+} = 12.7$  (ground state acidity of acridinium in MeCN)<sup>29</sup>,  $hv_1$  is the computed Gibbs free energy of the 0–0 electronic transition of **AcrH<sup>+</sup>** to the first singlet excited state **AcrH<sup>+</sup>\***, and  $hv_2$  is the computed Gibbs free energy of the 0–0 electronic transition of **Acr** to the first singlet excited state **Acr<sup>\*</sup>**.

# AcrH<sup>+</sup>

E(RPW6B95D3) = -556.993480131

Charge = 0      Multiplicity = 1

|   |               |               |               |
|---|---------------|---------------|---------------|
| C | -7.9226881823 | -1.3275996813 | -0.8335494745 |
| C | -6.806156719  | -1.8109775053 | -0.2190830222 |
| C | -5.7505292837 | -0.930310867  | 0.05522086    |
| C | -5.8415121    | 0.4395342933  | -0.2997351241 |
| C | -7.0199765955 | 0.8967313209  | -0.9363138852 |
| C | -8.035158194  | 0.0322705777  | -1.1962096763 |
| C | -4.770582814  | 1.2728924383  | -0.0078786448 |
| C | -3.6283185652 | 0.7906659383  | 0.6162402582  |
| C | -3.5718072656 | -0.5848758976 | 0.956435713   |
| C | -2.4391217959 | -1.1187992826 | 1.5869057256  |
| H | -2.4168233042 | -2.1680552    | 1.8367208245  |
| C | -1.3921357345 | -0.2925360453 | 1.8674752394  |
| C | -1.4264044443 | 1.079919521   | 1.5379966799  |
| C | -2.5174693432 | 1.6107681961  | 0.9271868689  |
| H | -8.740034693  | -1.997613357  | -1.0489916374 |
| H | -6.7159145506 | -2.8492823677 | 0.0589749207  |
| H | -0.5164221731 | -0.6943954719 | 2.3522737789  |
| H | -2.56476682   | 2.6563812957  | 0.66653653    |
| N | -4.6286898169 | -1.3647864237 | 0.6599994454  |
| H | -8.9340954168 | 0.3764122577  | -1.6813154923 |
| H | -0.5781625626 | 1.7008393643  | 1.7763697562  |
| H | -4.8270578204 | 2.3185214495  | -0.272960859  |
| H | -7.0847152539 | 1.9393851524  | -1.2049726214 |

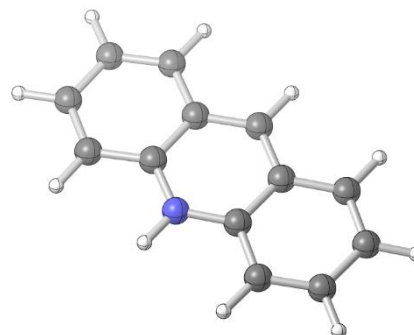

H -4.5761537315 -2.3450421659 0.9087310065

# **AcrH<sup>+</sup>\***

E(RPW6B95D3) = -556.985211426

Charge = 0 Multiplicity = 1

|   |          |          |         |
|---|----------|----------|---------|
| C | 3.61794  | -0.72835 | 0.07355 |
| C | 2.38516  | -1.38441 | 0.07815 |
| C | 1.20323  | -0.6497  | 0.0735  |
| C | 1.21971  | 0.76442  | 0.06426 |
| C | 2.46629  | 1.38736  | 0.05976 |
| C | 3.65635  | 0.64723  | 0.06433 |
| C | -0.00001 | 1.46713  | 0.05991 |
| C | -1.21972 | 0.76439  | 0.06424 |
| C | -1.20321 | -0.64973 | 0.07347 |
| C | -2.38513 | -1.38446 | 0.07809 |
| H | -2.3341  | -2.4628  | 0.08541 |
| C | -3.61792 | -0.72843 | 0.07347 |
| C | -3.65635 | 0.64715  | 0.06426 |
| C | -2.46631 | 1.38731  | 0.05972 |
| H | 4.52751  | -1.30551 | 0.07709 |
| H | 2.33416  | -2.46275 | 0.08548 |
| H | -4.52747 | -1.30561 | 0.07698 |
| H | -2.50725 | 2.46567  | 0.05235 |
| N | 0.00002  | -1.28533 | 0.07813 |
| H | 4.60014  | 1.16769  | 0.0604  |
| H | -4.60016 | 1.16759  | 0.06031 |

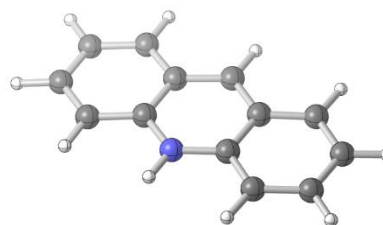



|   |          |          |         |
|---|----------|----------|---------|
| H | -0.00002 | 2.54517  | 0.0535  |
| H | 2.5072   | 2.46572  | 0.05239 |
| H | 0.00003  | -2.29614 | 0.08319 |

# Acr

E(RPW6B95D3) = -556.530476251

Charge = 0      Multiplicity = 1

|   |               |               |               |
|---|---------------|---------------|---------------|
| C | -7.9118610261 | -1.3330171753 | -0.8267851625 |
| C | -6.790673068  | -1.79672161   | -0.2159680708 |
| C | -5.7102729722 | -0.9219549039 | 0.070124274   |
| C | -5.8327352086 | 0.453858284   | -0.3001337671 |
| C | -7.0195820138 | 0.8990156355  | -0.9366469403 |
| C | -8.0309332565 | 0.0304034908  | -1.192885049  |
| C | -4.7714721148 | 1.298604301   | -0.0156307854 |
| C | -3.6377741405 | 0.8021048365  | 0.6082363443  |
| C | -3.6114129542 | -0.5890823838 | 0.9386716161  |
| C | -2.4558465797 | -1.1094376904 | 1.5776899722  |
| H | -2.444665191  | -2.1601976917 | 1.8234461718  |
| C | -1.4027890203 | -0.3012819451 | 1.865694408   |
| C | -1.4309202353 | 1.0765491691  | 1.5372866418  |
| C | -2.5179948829 | 1.6128349334  | 0.9261766974  |
| H | -8.7272834268 | -2.0072547279 | -1.0394926316 |
| H | -6.689898809  | -2.8333266498 | 0.0667864555  |
| H | -0.5290720317 | -0.7079289483 | 2.3515147964  |
| H | -2.5531783192 | 2.6614483985  | 0.6704515384  |
| N | -4.6254947161 | -1.4124635022 | 0.6708272464  |

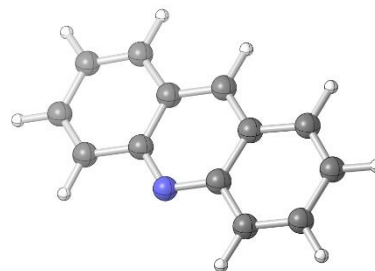

H -8.9325787907 0.3713678822 -1.67725628  
H -0.5803880919 1.6950488322 1.7779610834  
H -4.8279772273 2.344981082 -0.2806436647  
H -7.0966417136 1.940880093 -1.2102078142

# **Acr\***

E(RPW6B95D3) = -556.521138939

Charge = 0 Multiplicity = 1

|   |          |          |          |
|---|----------|----------|----------|
| C | 3.60349  | -0.74524 | -0.09507 |
| C | 2.36537  | -1.39916 | -0.11067 |
| C | 1.16226  | -0.6868  | -0.0936  |
| C | 1.21485  | 0.74245  | -0.05956 |
| C | 2.46039  | 1.36824  | -0.04445 |
| C | 3.65158  | 0.62913  | -0.06212 |
| C | 0.00000  | 1.44632  | -0.04297 |
| C | -1.21484 | 0.74243  | -0.05955 |
| C | -1.16223 | -0.68682 | -0.0936  |
| C | -2.36532 | -1.39921 | -0.11065 |
| H | -2.31606 | -2.47723 | -0.13651 |
| C | -3.60346 | -0.74531 | -0.09505 |
| C | -3.65157 | 0.62906  | -0.0621  |
| C | -2.46039 | 1.36819  | -0.04443 |
| H | 4.51258  | -1.32509 | -0.10895 |
| H | 2.31613  | -2.47718 | -0.13652 |
| H | -4.51253 | -1.32518 | -0.10892 |
| H | -2.50044 | 2.44733  | -0.01856 |

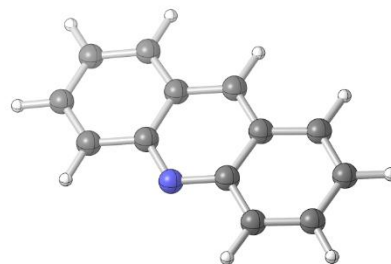

|   |          |          |          |
|---|----------|----------|----------|
| N | 0.00002  | -1.37043 | -0.11003 |
| H | 4.5983   | 1.14527  | -0.04972 |
| H | -4.5983  | 1.14518  | -0.04969 |
| H | -0.00002 | 2.52633  | -0.01797 |
| H | 2.50041  | 2.44738  | -0.01858 |

15

E(UPW6B95D3) = -589.147663368

Charge = 0      Multiplicity = 2

|   |               |              |               |
|---|---------------|--------------|---------------|
| S | 0.4239244662  | 2.5686412502 | -0.0171923999 |
| O | 1.8293933433  | 2.6031427341 | 0.34951688    |
| O | -0.3894414089 | 3.7649801265 | 0.1185446536  |
| C | 0.3144596886  | 2.0231343337 | -1.7204794792 |
| H | 0.8476154663  | 1.0834128967 | -1.801226835  |
| H | -0.7355208223 | 1.9135115998 | -1.9644632167 |
| H | 0.7831186866  | 2.7995308091 | -2.3195526728 |

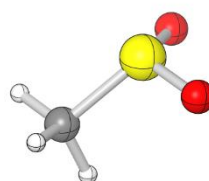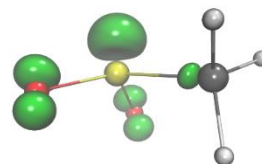

16

E(RPW6B95D3) = -2297.12450657

Charge = 0      Multiplicity = 1

|    |               |               |               |
|----|---------------|---------------|---------------|
| Cu | -1.2785700548 | 1.3516227369  | 0.5179281706  |
| O  | -3.6261765575 | 0.0628104158  | 0.8623485524  |
| O  | -3.3106486043 | 0.4186232806  | -1.3330957346 |
| C  | -3.7910656596 | -0.2747364669 | -0.2792024706 |
| C  | -4.5358615106 | -1.4702791494 | -0.7176945926 |

S111

[Go back to table of contents](#)

|   |               |               |               |
|---|---------------|---------------|---------------|
| C | -4.6811748327 | -1.8062689403 | -2.0592256135 |
| C | -5.1025244168 | -2.270837931  | 0.2668786997  |
| C | -5.391096969  | -2.9389437995 | -2.4080131093 |
| H | -4.2425427513 | -1.1868606732 | -2.8236015963 |
| C | -5.8104797489 | -3.4016698264 | -0.0878956174 |
| H | -4.9792944753 | -1.9958146969 | 1.3020732692  |
| C | -5.9554196751 | -3.7357614555 | -1.4250852685 |
| H | -5.5043975816 | -3.200854345  | -3.44822177   |
| H | -6.2495903766 | -4.0231309095 | 0.6765120729  |
| H | -6.5095574532 | -4.6193890116 | -1.7018729966 |
| N | -2.5325364863 | 1.5851132994  | -0.9931568049 |
| C | -3.4870024696 | 2.6669257943  | -0.7264394053 |
| H | -2.9109403811 | 3.5698062157  | -0.5545529274 |
| H | -4.1471057451 | 2.8052159803  | -1.5811917691 |
| H | -4.0578117467 | 2.4319198306  | 0.1625704624  |
| C | -1.7828282009 | 1.8465144097  | -2.2243230872 |
| H | -1.1829921866 | 2.7334492796  | -2.0534855717 |
| H | -1.1332915927 | 1.0050968414  | -2.4306075421 |
| H | -2.4629883109 | 2.0145633034  | -3.0581838417 |
| F | 0.0099425874  | 1.3056774376  | 1.8225697418  |

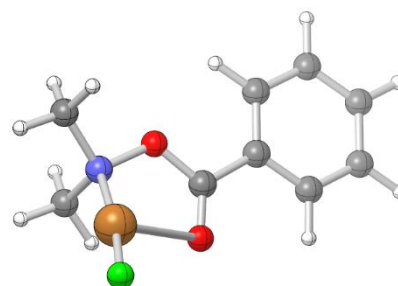

17

E(RPW6B95D3) = -2786.30600663

Charge = 0      Multiplicity = 1

|    |               |               |               |
|----|---------------|---------------|---------------|
| Cu | -0.7457822168 | -0.1214502144 | 0.1941405497  |
| O  | -2.3850536542 | -0.7393910319 | -0.9500723087 |

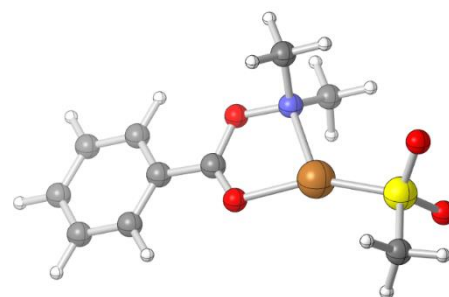

|   |               |               |               |
|---|---------------|---------------|---------------|
| O | -1.6402009823 | 0.637305068   | -2.5607843163 |
| C | -2.4829358784 | -0.2719533159 | -2.0678991818 |
| C | -3.5368942715 | -0.6459148267 | -3.0179348644 |
| C | -3.5855768265 | -0.1177002    | -4.3039432601 |
| C | -4.4984909086 | -1.5582997731 | -2.5973616834 |
| C | -4.5952036495 | -0.5055585391 | -5.162153134  |
| H | -2.8390163108 | 0.5874121973  | -4.6292372673 |
| C | -5.5056775495 | -1.9393082925 | -3.4600696083 |
| H | -4.4456057122 | -1.9579744937 | -1.5976559384 |
| C | -5.5537391885 | -1.4137198654 | -4.7416881218 |
| H | -4.6350873458 | -0.100337706  | -6.1607369963 |
| H | -6.2529872953 | -2.6456767928 | -3.1352241914 |
| H | -6.3412149727 | -1.7135073847 | -5.4156974268 |
| N | -0.5826338673 | 1.0167207144  | -1.6542034577 |
| C | -0.7534889911 | 2.4483209756  | -1.439086549  |
| H | 0.047407628   | 2.7700836554  | -0.7815402548 |
| H | -0.7022969691 | 2.9983007745  | -2.3783140965 |
| H | -1.7051565155 | 2.6265555916  | -0.9513118161 |
| C | 0.654740827   | 0.7094867381  | -2.3618905118 |
| H | 1.4741853359  | 1.0107083482  | -1.7176777193 |
| H | 0.7139708193  | -0.3593595236 | -2.5330267784 |
| H | 0.7133450425  | 1.2471638712  | -3.3077265149 |
| S | 0.6740770243  | -0.1397661267 | 1.8716459316  |
| O | 1.0316415726  | 1.2381780365  | 2.2659263953  |
| O | 1.8337877777  | -1.005673442  | 1.5811162335  |
| C | -0.027563973  | -0.8403024201 | 3.3616170208  |
| H | 0.7422133038  | -0.7901630668 | 4.1293563805  |

H -0.8950346038 -0.2563209722 3.655144101  
H -0.3107632887 -1.871537943 3.1725816449

18

E(RPW6B95D3) = -2786.30980720

Charge = 0 Multiplicity = 1

Cu -1.3151733783 0.6558420073 -0.3660863476  
O -2.4343036424 -0.9099575279 -0.5233703723  
O -2.3151651852 0.1870525822 -2.4158522062  
C -2.7470190269 -0.7742294199 -1.7596662043  
C -3.6263046128 -1.7985210515 -2.3709251251  
C -4.0043395797 -1.6712334641 -3.7012826707  
C -4.0696362568 -2.8845282475 -1.6268774577  
C -4.8199624719 -2.622991301 -4.2831994631  
H -3.6520091888 -0.8227636015 -4.2658118032  
C -4.8842758287 -3.8365266609 -2.2109778908  
H -3.7708415901 -2.9735921094 -0.5948960854  
C -5.2597042447 -3.7062199208 -3.53853467  
H -5.1133656378 -2.5224939557 -5.316617951  
H -5.2268604974 -4.680543632 -1.6326449792  
H -5.8958135393 -4.4499437747 -3.9936177554  
N -0.4828265812 2.2753440304 -0.4102219825  
C -0.4714207289 3.1158121968 0.7543785183  
H 0.4180582614 2.9735040036 1.3744896535  
H -0.4674990353 4.1549655675 0.4128936866  
H -1.3641009421 2.9627718086 1.351128638  
C 0.7807067875 2.2761514751 -1.0896052071

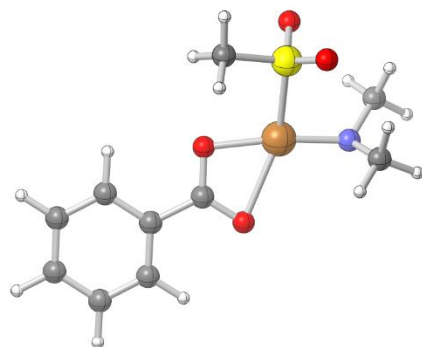

|   |               |               |               |
|---|---------------|---------------|---------------|
| H | 1.5995879234  | 1.9599384638  | -0.436216381  |
| H | 0.7466052722  | 1.6447786994  | -1.9717827828 |
| H | 0.9979939499  | 3.3004866401  | -1.405348047  |
| S | -0.0427388605 | 0.0596785075  | 1.3852946101  |
| O | -0.65962438   | 0.6193163536  | 2.5701587777  |
| O | 1.3766163948  | 0.2686457796  | 1.1867162066  |
| C | -0.3032105058 | -1.697022522  | 1.4152141779  |
| H | 0.2820295149  | -2.0565784158 | 2.2584069971  |
| H | -1.3590369719 | -1.8915016432 | 1.5509487546  |
| H | 0.0595597027  | -2.1135144783 | 0.4826650632  |

19

E(RPW6B95D3) = -2786.36719013

Charge = 0      Multiplicity = 1

|    |               |               |               |
|----|---------------|---------------|---------------|
| Cu | -2.3878588935 | -0.7991634935 | 0.9716063654  |
| O  | -3.7148663016 | -1.8787990245 | 0.1632969635  |
| O  | -4.4616335524 | -0.006884972  | -0.7862702496 |
| C  | -4.5222174794 | -1.2197174048 | -0.5808863943 |
| C  | -5.6045829639 | -2.0313821312 | -1.2278166575 |
| C  | -6.5110611654 | -1.4123852275 | -2.0783008969 |
| C  | -5.7183234873 | -3.3946715348 | -0.9879986201 |
| C  | -7.5167875806 | -2.1447390019 | -2.6821176073 |
| H  | -6.4133056743 | -0.3532229596 | -2.2558222313 |
| C  | -6.7251222187 | -4.1283871774 | -1.5896119826 |
| H  | -5.0123491855 | -3.8688909899 | -0.3258303342 |
| C  | -7.6256817116 | -3.5046440283 | -2.4380098725 |

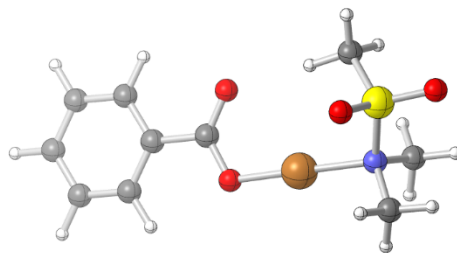

|   |               |               |               |
|---|---------------|---------------|---------------|
| H | -8.2170563254 | -1.656710995  | -3.3427333031 |
| H | -6.8087212832 | -5.1871286771 | -1.3969491131 |
| H | -8.4111388971 | -4.0768711213 | -2.9078470093 |
| N | -0.9365074625 | 0.3172672271  | 1.766848124   |
| S | -1.5514798067 | 1.8804393248  | 2.1534259016  |
| O | -0.4445427362 | 2.737248842   | 2.4625941573  |
| O | -2.5601684965 | 1.6648235994  | 3.1453735653  |
| C | -2.2984895215 | 2.3898234087  | 0.6526684828  |
| H | -1.538627839  | 2.5662341052  | -0.0994725054 |
| H | -3.0222685766 | 1.6439996392  | 0.3292049285  |
| H | -2.7990790801 | 3.3242964836  | 0.894158036   |
| C | 0.1787131159  | 0.4061504859  | 0.7998129086  |
| H | 0.5206404089  | -0.6039714707 | 0.6054116016  |
| H | -0.1663149713 | 0.8407489615  | -0.1303703278 |
| H | 0.996094858   | 0.9955421502  | 1.209583648   |
| C | -0.4647300802 | -0.3210989298 | 3.0195271827  |
| H | -1.2835172598 | -0.3960516072 | 3.7230138827  |
| H | -0.1163117468 | -1.3145186374 | 2.7626253335  |
| H | 0.3554325043  | 0.2471144064  | 3.4553572434  |

20

E(RPW6B95D3) = -2350.50110917

Charge = 0      Multiplicity = 1

|    |               |               |               |
|----|---------------|---------------|---------------|
| Cu | -1.1784377153 | -0.6277178183 | 0.6855533559  |
| O  | -3.5374861456 | -1.9368862502 | 1.5004279524  |
| O  | -2.7603443224 | -0.9153871627 | -0.3207302511 |

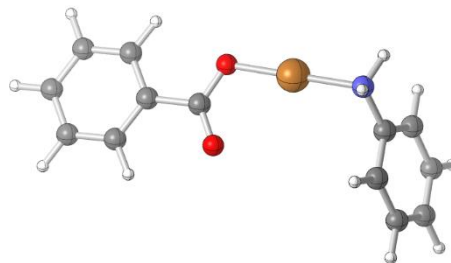



|   |               |               |               |
|---|---------------|---------------|---------------|
| C | -3.6547256989 | -1.5554720034 | 0.336339632   |
| C | -4.9245527695 | -1.8389797559 | -0.411889571  |
| C | -5.0940827035 | -1.428086002  | -1.7275720603 |
| C | -5.9501414707 | -2.5273078612 | 0.2226583793  |
| C | -6.2728668267 | -1.7018417571 | -2.3987324148 |
| H | -4.2939721592 | -0.8949386984 | -2.2150511257 |
| C | -7.1289613321 | -2.8015037254 | -0.4461252366 |
| H | -5.8048124196 | -2.841507375  | 1.2439880324  |
| C | -7.2921631811 | -2.3887438087 | -1.7591312009 |
| H | -6.3976763636 | -1.3800363593 | -3.421467526  |
| H | -7.9213014691 | -3.3368487884 | 0.0545621174  |
| H | -8.2116500956 | -2.6024383451 | -2.2827157943 |
| N | 0.463683592   | -0.3401327945 | 1.7151231553  |
| H | 0.2581225674  | 0.3707086467  | 2.4070390453  |
| H | 1.1702665057  | 0.0352701953  | 1.0946234694  |
| C | 0.9225511567  | -1.5406170482 | 2.3423094901  |
| C | 0.4134579476  | -1.9090727586 | 3.5766480805  |
| C | 1.8500339298  | -2.3464886095 | 1.7031044135  |
| C | 0.8369064685  | -3.084012423  | 4.1702487209  |
| H | -0.3162345552 | -1.2797412911 | 4.0638438022  |
| C | 2.2665173805  | -3.5215809378 | 2.3029281057  |
| H | 2.2398708599  | -2.0540297518 | 0.7393309061  |
| C | 1.7634990096  | -3.8960205368 | 3.5374562978  |
| H | 0.4373035364  | -3.3651902388 | 5.1322935614  |
| H | 2.9898595978  | -4.1452382361 | 1.8006742864  |
| H | 2.090220126   | -4.8127801045 | 4.0023230767  |

21

E(UPW6B95D3) = -2349.86283224

Charge = 0      Multiplicity = 2

|    |               |               |               |
|----|---------------|---------------|---------------|
| Cu | -1.4756524341 | 0.3107474418  | 0.9961379614  |
| O  | -3.111388565  | -0.0990954704 | -0.2217896356 |
| O  | -1.4328007282 | 1.1174573774  | -0.8967632775 |
| C  | -2.5477826705 | 0.5737831641  | -1.1265056626 |
| C  | -3.1807574073 | 0.7259732967  | -2.4573215831 |
| C  | -2.5664319915 | 1.5054231553  | -3.4293814599 |
| C  | -4.3813926795 | 0.0877929526  | -2.7401816139 |
| C  | -3.1492542411 | 1.6465438927  | -4.6744388378 |
| H  | -1.6342766893 | 1.9945388429  | -3.1965316124 |
| C  | -4.9614481056 | 0.2271909502  | -3.9873159663 |
| H  | -4.8476570056 | -0.5153960543 | -1.9776686476 |
| C  | -4.3463369952 | 1.0065886476  | -4.9543000314 |
| H  | -2.6712469142 | 2.2535013751  | -5.4276929456 |
| H  | -5.8925458929 | -0.2716491608 | -4.2073876544 |
| H  | -4.8000807568 | 1.1151471272  | -5.9275579186 |
| N  | -0.6811315962 | 0.1459813387  | 2.6423327044  |
| H  | -0.8453528752 | 0.8576263473  | 3.3428891168  |
| C  | 0.1021157185  | -0.8524702927 | 3.1283868145  |
| C  | 0.5924006115  | -0.8317125981 | 4.4454529151  |
| C  | 0.4356641585  | -1.9452733516 | 2.3103582643  |
| C  | 1.3784089611  | -1.8603645647 | 4.9167097584  |
| H  | 0.3394586501  | 0.0032270006  | 5.0828414266  |
| C  | 1.2223933215  | -2.9663788818 | 2.791593742   |

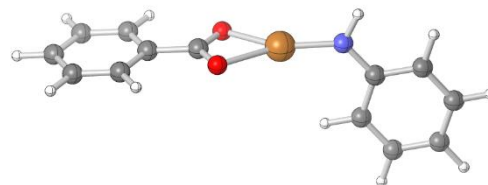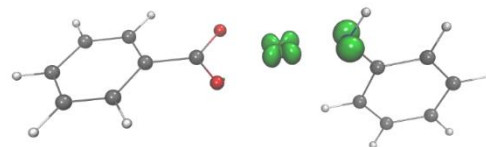

|   |              |               |              |
|---|--------------|---------------|--------------|
| H | 0.0576138376 | -1.9660738218 | 1.2979207013 |
| C | 1.6998474282 | -2.9333969008 | 4.0965112871 |
| H | 1.744275949  | -1.8295018507 | 5.9316153005 |
| H | 1.4681871572 | -3.7983623892 | 2.1496587665 |
| H | 2.3153363452 | -3.7366851735 | 4.4696221777 |

22

E(RPW6B95D3) = -2939.02963014

Charge = 0      Multiplicity = 1

|    |               |               |               |
|----|---------------|---------------|---------------|
| Cu | -0.8319047715 | 0.1856034429  | 0.6235819614  |
| O  | -1.9696599969 | -0.0477034092 | -0.8671314613 |
| O  | -1.9215790353 | 2.1670703935  | -0.9105549336 |
| C  | -2.2846231106 | 1.0908183974  | -1.3807900457 |
| C  | -3.1434475138 | 1.0334186205  | -2.599084589  |
| C  | -3.5008608997 | 2.2145732059  | -3.2358002474 |
| C  | -3.5902211743 | -0.1810905517 | -3.1040033517 |
| C  | -4.2960122564 | 2.1825868812  | -4.3660572093 |
| H  | -3.1466538452 | 3.1498217512  | -2.8324746619 |
| C  | -4.3876911148 | -0.2126707102 | -4.2335204349 |
| H  | -3.3073511752 | -1.0935880768 | -2.6048165727 |
| C  | -4.7405537609 | 0.9685852195  | -4.8658674199 |
| H  | -4.5699134208 | 3.102716678   | -4.8588418514 |
| H  | -4.7335904008 | -1.1581302159 | -4.6221062963 |
| H  | -5.3615164995 | 0.9434073613  | -5.7483360605 |
| N  | 0.4535224346  | 0.1979002884  | 1.9244240314  |
| S  | -2.27848172   | 0.4975894996  | 2.3715778454  |

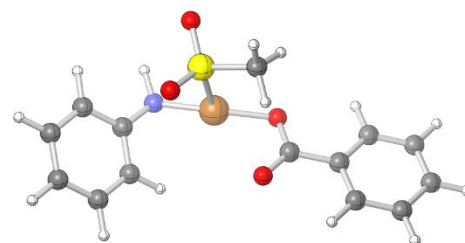

|   |               |               |              |
|---|---------------|---------------|--------------|
| O | -2.0314848715 | 1.7649637683  | 3.0222924008 |
| O | -2.3304493548 | -0.7080666165 | 3.1736364169 |
| C | -3.8277122465 | 0.6478939641  | 1.5130559837 |
| H | -3.7780553345 | 1.5267746952  | 0.881744753  |
| H | -3.9925212885 | -0.2549724248 | 0.9383026145 |
| H | -4.5762196393 | 0.7647692404  | 2.2936364194 |
| C | 0.8670690962  | 1.3654136219  | 2.4905156374 |
| C | 1.1002062985  | 2.4818634935  | 1.6710502809 |
| C | 1.067085776   | 1.4812189274  | 3.874969506  |
| C | 1.5072251365  | 3.6726111875  | 2.2244197384 |
| H | 0.9505145654  | 2.3859603119  | 0.6056861479 |
| C | 1.5049146434  | 2.6690124445  | 4.4135778609 |
| H | 0.8679579935  | 0.6269968589  | 4.5050052096 |
| C | 1.7188580067  | 3.769913727   | 3.5944504868 |
| H | 1.6741164304  | 4.52947183    | 1.5909242006 |
| H | 1.6653033741  | 2.7493795315  | 5.4772771325 |
| H | 2.0507091459  | 4.7027710696  | 4.0224984945 |
| H | 0.3311381095  | -0.5221661861 | 2.6292257135 |

23

E(RPW6B95D3) = -2939.07278236

Charge = 0      Multiplicity = 1

|    |               |               |               |
|----|---------------|---------------|---------------|
| Cu | -1.5119479772 | 1.0742226949  | -0.1747295544 |
| O  | -2.3042457263 | -0.607483139  | -0.5215221609 |
| O  | -3.2971772399 | 0.3275590383  | -2.2832856418 |
| C  | -3.0802780374 | -0.6288326385 | -1.5414520561 |

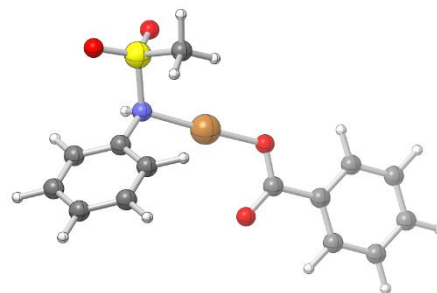

|   |               |               |               |
|---|---------------|---------------|---------------|
| C | -3.752031188  | -1.945262277  | -1.8012352066 |
| C | -4.639700961  | -2.0645353055 | -2.8621831413 |
| C | -3.5041377024 | -3.0484490414 | -0.9945248009 |
| C | -5.2730551875 | -3.2681034617 | -3.1132130119 |
| H | -4.8235050488 | -1.2009914602 | -3.481468943  |
| C | -4.1352401869 | -4.2538374751 | -1.2454231599 |
| H | -2.8138946384 | -2.949243976  | -0.1726064679 |
| C | -5.021222392  | -4.3653839738 | -2.3047828047 |
| H | -5.9629391222 | -3.35248588   | -3.9390161056 |
| H | -3.9368118257 | -5.1071700786 | -0.614911674  |
| H | -5.5147280377 | -5.3053418847 | -2.5001101045 |
| N | -0.6073012182 | 2.8143754882  | 0.2256980791  |
| S | -0.0112340855 | 2.9124888708  | 1.8455839564  |
| O | 0.3369256863  | 4.269745078   | 2.1274893435  |
| O | 0.9904240232  | 1.8938226092  | 1.911119479   |
| C | -1.4128133174 | 2.4599834992  | 2.7897712992  |
| H | -1.0906179757 | 2.4968092653  | 3.8272052848  |
| H | -2.2056219595 | 3.1806709082  | 2.6236296159  |
| H | -1.716452922  | 1.4547938799  | 2.5177552334  |
| H | 0.2448379076  | 2.7495515578  | -0.3325282689 |
| C | -1.389108815  | 3.9518227667  | -0.2112151924 |
| C | -2.7632252485 | 3.9171355113  | -0.0620549645 |
| C | -0.7602289333 | 5.0479246806  | -0.7737100624 |
| C | -3.5185384012 | 4.9994228546  | -0.4757706584 |
| H | -3.2303949175 | 3.0372392859  | 0.3568980155  |
| C | -1.5233350012 | 6.1201705147  | -1.1980268898 |
| H | 0.3135439293  | 5.0562822201  | -0.8813181523 |

|   |               |              |               |
|---|---------------|--------------|---------------|
| C | -2.899873451  | 6.0997738313 | -1.0445405007 |
| H | -4.5910306958 | 4.9746393566 | -0.3655674278 |
| H | -1.0399053857 | 6.9738465498 | -1.6461788398 |
| H | -3.4911002904 | 6.9391149312 | -1.3755519685 |

24

E(RPW6B95D3) = -2710.34829951

Charge = 0      Multiplicity = 1

|    |               |               |               |
|----|---------------|---------------|---------------|
| Cu | -0.2907046406 | -0.7214379863 | -0.5046487652 |
| O  | -1.777361211  | 0.4297139874  | -0.6256680555 |
| C  | -2.4694628015 | 0.6105106225  | -1.6897387177 |
| O  | -3.6839048997 | 0.7398726285  | -1.7244187007 |
| S  | -0.0199594024 | 0.9604386048  | -3.0574747465 |
| C  | -1.7235280913 | 0.6994452795  | -2.9842095048 |
| C  | -2.2488471224 | 0.6520433427  | -4.2388599982 |
| C  | -1.2822514278 | 0.7944409599  | -5.2611833612 |
| H  | -1.5091391287 | 0.7777962725  | -6.3143364218 |
| C  | -0.0268916418 | 0.9694447509  | -4.7703104714 |
| H  | 0.8864775131  | 1.1324794011  | -5.3151216874 |
| H  | -3.3041413858 | 0.5191991182  | -4.4089858289 |
| N  | 2.3946014281  | -3.1039828133 | 0.8015488022  |
| N  | 1.7669884749  | -2.525461167  | 0.0493718726  |
| N  | 1.1353331177  | -1.9370904329 | -0.775450007  |
| Na | 0.9656582193  | -1.8140911487 | -3.0521659185 |

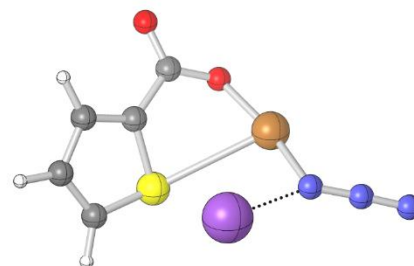

25

E(UPW6B95D3) = -2547.77031162

Charge = 0      Multiplicity = 2

|    |               |               |               |
|----|---------------|---------------|---------------|
| Cu | -0.3632655039 | -0.2693976265 | -0.9349602137 |
| O  | -1.9975253366 | 0.5556254884  | -0.5130425785 |
| C  | -2.7478122045 | 0.872464448   | -1.5271264859 |
| O  | -3.9409383948 | 1.0674437873  | -1.4721182506 |
| S  | -0.3692334655 | 1.5666274383  | -2.7917175872 |
| C  | -1.996081437  | 0.9590734597  | -2.8073326531 |
| C  | -2.3257889617 | 0.5028601223  | -4.0415816601 |
| C  | -1.2603126562 | 0.6151844147  | -4.9681873756 |
| H  | -1.3296505262 | 0.3134938467  | -6.0001244831 |
| C  | -0.1326442044 | 1.1464775111  | -4.4270492518 |
| H  | 0.8008942626  | 1.3659781721  | -4.913337843  |
| H  | -3.2875655131 | 0.0735815407  | -4.2676455661 |
| N  | 1.2955905439  | -1.0292141746 | -1.3994981799 |
| N  | 1.7223397024  | -1.9820395347 | -0.8116681582 |
| N  | 2.188514555   | -2.8834410735 | -0.2993593632 |

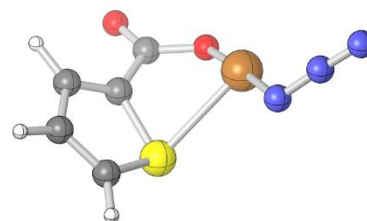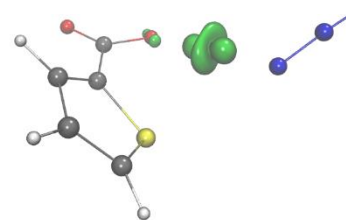

26

E(RPW6B95D3) = -3136.93280048

Charge = 0      Multiplicity = 1

|    |               |               |               |
|----|---------------|---------------|---------------|
| Cu | 0.0237390754  | -0.582227709  | -0.9737585513 |
| O  | -1.7364722847 | -0.0159493288 | -0.8452991622 |
| C  | -2.559671176  | 0.2245658883  | -1.8296827835 |

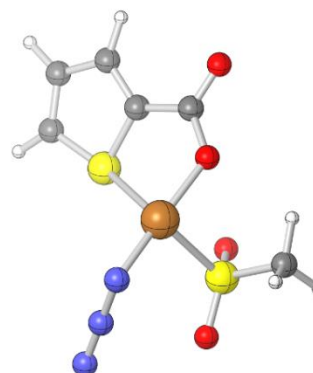

|   |               |               |               |
|---|---------------|---------------|---------------|
| O | -3.7634600504 | 0.1508775519  | -1.6889741995 |
| S | -0.3594729816 | 1.1137188131  | -3.3352368683 |
| C | -1.9866337201 | 0.6032804465  | -3.1370258977 |
| C | -2.6419035896 | 0.6105218098  | -4.3341826536 |
| C | -1.8211437564 | 1.0092694884  | -5.4082307615 |
| H | -2.1542696969 | 1.0834479796  | -6.4298930274 |
| C | -0.5507309032 | 1.3030264809  | -5.0143302982 |
| H | 0.2716070598  | 1.6496764029  | -5.614609605  |
| H | -3.6775192158 | 0.3289515136  | -4.4240086984 |
| N | 1.6695356402  | -1.3809773553 | -0.9655806331 |
| N | 2.7409222394  | -0.8448501584 | -1.001399253  |
| N | 3.7810307398  | -0.3991120464 | -1.0257134844 |
| S | 0.585916265   | 1.1227065085  | 0.4656340088  |
| O | 0.0057195059  | 2.2901822972  | -0.123047402  |
| O | 1.9768709476  | 1.1027352977  | 0.8066059613  |
| C | -0.376295145  | 0.5258068815  | 1.8264911776  |
| H | -0.2414822726 | 1.2648379924  | 2.6148346093  |
| H | -1.40528944   | 0.4620834417  | 1.4953742757  |
| H | 0.0333504895  | -0.4369882961 | 2.1119898363  |

27

E(RPW6B95D3) = -3136.97570826

Charge = 0      Multiplicity = 1

|    |               |               |               |
|----|---------------|---------------|---------------|
| Cu | -1.1507227266 | -0.6265385763 | -0.4442329463 |
| O  | -2.7364325236 | 0.1660609278  | -1.0424234432 |
| C  | -3.1723352056 | 0.4351537684  | -2.2195817688 |

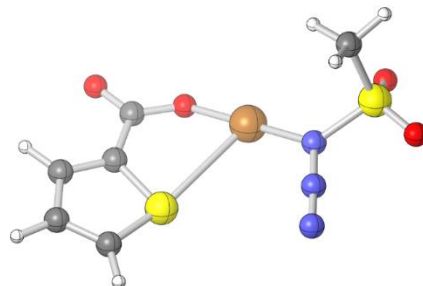



|   |               |               |               |
|---|---------------|---------------|---------------|
| O | -4.3544919587 | 0.585318085   | -2.4940170691 |
| S | -0.4770842364 | 0.6116964722  | -3.0394137313 |
| C | -2.1723376478 | 0.592015474   | -3.3128211764 |
| C | -2.4410818117 | 0.7599922951  | -4.6395007006 |
| C | -1.2810650514 | 0.8899565686  | -5.4323672494 |
| H | -1.2897409852 | 1.0274018897  | -6.5010679065 |
| C | -0.1380319248 | 0.8269418214  | -4.6953019681 |
| H | 0.8796769734  | 0.9040837728  | -5.0350415713 |
| H | -3.4495697874 | 0.7864989015  | -5.0165139326 |
| N | 0.5085771604  | -1.4991070772 | 0.1067144128  |
| N | 1.5472196795  | -1.3482209215 | -0.5604725212 |
| N | 2.4569323571  | -1.1757883787 | -1.1719142544 |
| S | 0.6763657818  | -2.6465927103 | 1.4074629529  |
| O | -0.1214097383 | -2.100067046  | 2.4489150442  |
| O | 2.0762287355  | -2.8613453896 | 1.5708875981  |
| C | -0.0982602331 | -4.0553820465 | 0.7236152822  |
| H | -0.0779023506 | -4.8174552357 | 1.4993206716  |
| H | -1.1205264175 | -3.7960909318 | 0.4705143731  |
| H | 0.462756881   | -4.377986043  | -0.146885096  |

S3

E(RPW6B95D3) = -2786.30321878

Charge = 0      Multiplicity = 1

|    |               |               |               |
|----|---------------|---------------|---------------|
| Cu | 0.7929297244  | 0.3745244982  | 0.5369577767  |
| O  | -1.4766371484 | -0.3090145502 | 0.3875328634  |
| O  | -1.3902218525 | 1.2650438512  | -1.2166944365 |

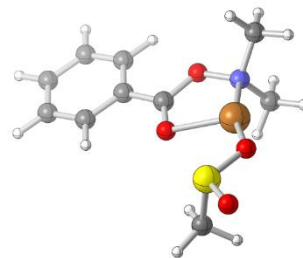

S125

[Go back to table of contents](#)

|   |               |               |               |
|---|---------------|---------------|---------------|
| C | -2.0356414421 | 0.4101623007  | -0.4016048131 |
| C | -3.494280973  | 0.4655862255  | -0.5968874647 |
| C | -4.0860704998 | 1.2869984455  | -1.5502931073 |
| C | -4.2809063997 | -0.3480516807 | 0.2104280239  |
| C | -5.460308727  | 1.2900182568  | -1.690475984  |
| H | -3.4765407256 | 1.9157962628  | -2.1775560741 |
| C | -5.6534082519 | -0.3395475684 | 0.0656827405  |
| H | -3.8051351697 | -0.9790086043 | 0.9438013615  |
| C | -6.2430247779 | 0.4788876975  | -0.8847878586 |
| H | -5.9220425764 | 1.9253919827  | -2.4296385622 |
| H | -6.2641908204 | -0.9703575197 | 0.6919671022  |
| H | -7.3160365562 | 0.4840155881  | -0.9985873925 |
| N | 0.0490757266  | 1.2537594765  | -1.1176933902 |
| C | 0.4129696968  | 2.6706760014  | -1.1651693684 |
| H | 1.4958689352  | 2.7264370119  | -1.1498711839 |
| H | 0.0315900762  | 3.1353083667  | -2.0733892708 |
| H | 0.0147080863  | 3.1702082085  | -0.2904580983 |
| C | 0.5099832265  | 0.5471893026  | -2.3158438007 |
| H | 1.5944254158  | 0.5730579377  | -2.3113872607 |
| H | 0.1765621327  | -0.4830757629 | -2.2750276308 |
| H | 0.1312455338  | 1.0329130167  | -3.2138368984 |
| S | 1.3379350218  | -1.0450939737 | 3.1150345352  |
| O | 2.475032967   | -1.5020872533 | 3.9484201941  |
| O | 1.9133710484  | -0.227980407  | 1.9290143214  |
| C | 0.8419255586  | -2.5424108136 | 2.2397792815  |
| H | 1.7226849803  | -2.9168355878 | 1.7225372065  |
| H | 0.4901950575  | -3.2696216223 | 2.9669038031  |

H 0.0486747326 -2.3076870873 1.5346093854

# S4

E(RPW6B95D3) = -2786.28907255

Charge = 0 Multiplicity = 1

|    |               |               |               |
|----|---------------|---------------|---------------|
| Cu | -0.7217651504 | 0.414257556   | -0.6415475556 |
| O  | -1.7008372754 | -1.3449292458 | -0.6773624432 |
| O  | -2.2139878736 | 0.2861939466  | -2.0076071402 |
| C  | -2.4269601381 | -0.8969808643 | -1.6109706389 |
| C  | -3.482054442  | -1.7259364372 | -2.2148148306 |
| C  | -4.2598902463 | -1.2205655066 | -3.2489628997 |
| C  | -3.696902862  | -3.0157894231 | -1.7452602641 |
| C  | -5.2489687593 | -2.004886322  | -3.810658683  |
| H  | -4.0812739234 | -0.2177384921 | -3.6027811038 |
| C  | -4.6873337296 | -3.7965946522 | -2.3087120825 |
| H  | -3.0846111849 | -3.3932131628 | -0.9420229106 |
| C  | -5.4624914169 | -3.2913734516 | -3.3407950077 |
| H  | -5.8541067402 | -1.6155563016 | -4.6143449526 |
| H  | -4.8560297159 | -4.7982571987 | -1.9454480643 |
| H  | -6.2356716631 | -3.9024137212 | -3.78071362   |
| N  | -0.070573273  | 2.0995837837  | -1.0539457634 |
| C  | -0.782649675  | 3.0831693556  | -0.2861512587 |
| H  | -0.4035726889 | 3.1945874703  | 0.7323576584  |
| H  | -0.640707381  | 4.046106833   | -0.7889033498 |
| H  | -1.8480379651 | 2.872060211   | -0.2792680708 |
| C  | 1.3512921094  | 2.2583269379  | -0.9503514593 |

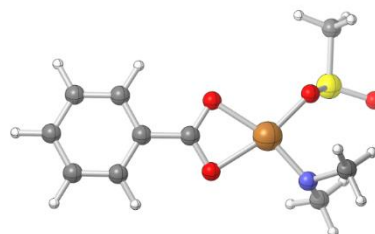

|   |              |               |               |
|---|--------------|---------------|---------------|
| H | 1.6998557378 | 2.4296765486  | 0.0683891108  |
| H | 1.8649203135 | 1.40846318    | -1.3868813262 |
| H | 1.6024939289 | 3.1415373791  | -1.5484917879 |
| S | 0.0937029994 | 0.6458162826  | 2.1651735471  |
| O | 0.9562336537 | 1.7799831373  | 2.5481007718  |
| O | 0.4896063899 | 0.1550808395  | 0.7224837349  |
| C | 0.7779280037 | -0.764178233  | 3.0295660742  |
| H | 1.825615088  | -0.84183576   | 2.7517609978  |
| H | 0.6754144426 | -0.5750320875 | 4.0941263068  |
| H | 0.2301494373 | -1.6573246012 | 2.7463790109  |

S5

E(RPW6B95D3) = -2618.06018254

Charge = 0      Multiplicity = 1

|    |               |              |              |
|----|---------------|--------------|--------------|
| Cu | -1.4017348177 | 1.3653953674 | 0.6365944416 |
| O  | 0.7375354472  | 3.1598544183 | 1.3873806644 |
| O  | -0.2302657362 | 1.2915347543 | 2.1259893539 |
| C  | 0.6302660116  | 2.2363651879 | 2.1936064768 |
| C  | 1.5625961377  | 2.1696367783 | 3.3696724927 |
| C  | 1.4565485239  | 1.1600995432 | 4.317534662  |
| C  | 2.550399128   | 3.1348784056 | 3.5136594683 |
| C  | 2.3255466087  | 1.1174070796 | 5.3936726431 |
| H  | 0.6877290901  | 0.4136116419 | 4.200571257  |
| C  | 3.4208074532  | 3.0932586256 | 4.5874571945 |
| H  | 2.6223726444  | 3.9134971664 | 2.7710267486 |
| C  | 3.3092209077  | 2.0836486333 | 5.5303543176 |

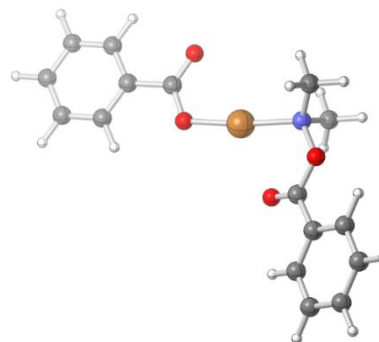

|   |               |               |               |
|---|---------------|---------------|---------------|
| H | 2.2361769439  | 0.3302218675  | 6.1268565095  |
| H | 4.1864176317  | 3.8470937381  | 4.691074053   |
| H | 3.9872606982  | 2.0499269503  | 6.3696415732  |
| O | -3.4931729408 | -0.0062100408 | 0.8384686883  |
| O | -3.3036304536 | 0.4263036503  | -1.3560616424 |
| C | -3.728343042  | -0.3026763026 | -0.3045215906 |
| C | -4.5045874899 | -1.4790822508 | -0.7338416691 |
| C | -4.7558511055 | -1.7555454207 | -2.0733402247 |
| C | -4.9932367304 | -2.322683893  | 0.2569053876  |
| C | -5.4927816087 | -2.8732606805 | -2.4139024633 |
| H | -4.3793389987 | -1.1012798563 | -2.8418710808 |
| C | -5.7284641756 | -3.4381615373 | -0.0900462253 |
| H | -4.7893004754 | -2.0923984982 | 1.2902080448  |
| C | -5.9785754256 | -3.7135231135 | -1.4251110462 |
| H | -5.6889831398 | -3.0895314483 | -3.4522049989 |
| H | -6.1072839445 | -4.093062589  | 0.6786554503  |
| H | -6.5541603594 | -4.5852488154 | -1.6957320806 |
| N | -2.5336034506 | 1.5931953682  | -1.0026807988 |
| C | -3.5002790263 | 2.6757665399  | -0.797476353  |
| H | -2.9363954959 | 3.578277627   | -0.5869776245 |
| H | -4.107392657  | 2.8170246116  | -1.6902584196 |
| H | -4.1263482867 | 2.43903532    | 0.0542566392  |
| C | -1.7139958745 | 1.8334236635  | -2.1898235839 |
| H | -1.1232603843 | 2.7221867626  | -1.9971584563 |
| H | -1.0536065094 | 0.9889897735  | -2.3433364195 |
| H | -2.340963095  | 1.988622972   | -3.0667683889 |

S6

E(RPW6B95D3) = -2939.01193791

Charge = 0      Multiplicity = 1

|    |               |               |               |
|----|---------------|---------------|---------------|
| Cu | 0.3656969222  | -0.7207227415 | 0.0381641203  |
| O  | -1.5238213806 | -1.3075222839 | 0.2979308973  |
| O  | -0.9491385416 | -0.0089207499 | -1.3379521449 |
| C  | -1.850406907  | -0.6654500375 | -0.7481600562 |
| C  | -3.229797976  | -0.6982892791 | -1.2557161107 |
| C  | -3.5635386907 | 0.026039692   | -2.3933849589 |
| C  | -4.191239681  | -1.4618709581 | -0.6056272281 |
| C  | -4.8564780632 | -0.0146689694 | -2.8781125872 |
| H  | -2.8046797013 | 0.6113462006  | -2.887633912  |
| C  | -5.4828026369 | -1.5006758553 | -1.0942342937 |
| H  | -3.9159813126 | -2.0206513336 | 0.274536863   |
| C  | -5.8147006409 | -0.7779421471 | -2.2295364308 |
| H  | -5.1183522524 | 0.5457432648  | -3.7618737369 |
| H  | -6.2311339195 | -2.0948066268 | -0.5935384969 |
| H  | -6.8236911833 | -0.8107954054 | -2.6109996466 |
| N  | 1.2713883162  | -1.7709375197 | 1.3215145514  |
| H  | 2.1839598827  | -1.3227678065 | 1.3430136749  |
| C  | 0.7245310203  | -1.745791645  | 2.5692986039  |
| C  | 1.3298900391  | -1.0471170106 | 3.6325202796  |
| C  | -0.4436248348 | -2.4909535599 | 2.8211998712  |
| C  | 0.7950709642  | -1.1077643966 | 4.8964788759  |
| H  | 2.2221888999  | -0.4716091817 | 3.4341620109  |
| C  | -0.9764173715 | -2.5318115572 | 4.0876448124  |

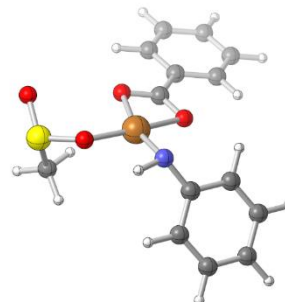

|   |               |               |               |
|---|---------------|---------------|---------------|
| H | -0.8933517918 | -3.0336578159 | 2.0071456212  |
| C | -0.3624357343 | -1.8434988648 | 5.1269481712  |
| H | 1.2691549705  | -0.5806773689 | 5.7093760783  |
| H | -1.867394441  | -3.1092146047 | 4.2778554662  |
| H | -0.7821815687 | -1.8847077884 | 6.1199037575  |
| S | 2.3007478905  | 1.3875611608  | -1.0529636225 |
| O | 2.0669750202  | 0.0414324881  | -0.3152984542 |
| O | 1.8343855209  | 1.3566857022  | -2.4461958026 |
| C | 1.1289646988  | 2.4441418228  | -0.1954168313 |
| H | 1.3539561596  | 2.4328301057  | 0.8666736292  |
| H | 1.2348959277  | 3.4491236128  | -0.5926076829 |
| H | 0.1303503964  | 2.0648754576  | -0.3960892881 |

S7

E(RPW6B95D3) = -3136.91069658

Charge = 0      Multiplicity = 1

|    |               |               |               |
|----|---------------|---------------|---------------|
| Cu | 0.3035023118  | -0.5020030109 | -0.6710483788 |
| O  | -1.3163639755 | 0.3758250344  | -0.4882924585 |
| C  | -2.1171007224 | 0.884393129   | -1.3810221972 |
| O  | -3.2560983872 | 1.2014301375  | -1.1000776804 |
| S  | 0.027985631   | 1.0260743023  | -3.2149273905 |
| C  | -1.6313656147 | 1.0391771221  | -2.768247868  |
| C  | -2.4240089775 | 1.1677410631  | -3.8724012306 |
| C  | -1.6904559671 | 1.2340371975  | -5.0737062103 |
| H  | -2.1337623686 | 1.3377932678  | -6.0499179335 |
| C  | -0.3459727277 | 1.1581954756  | -4.8671949463 |

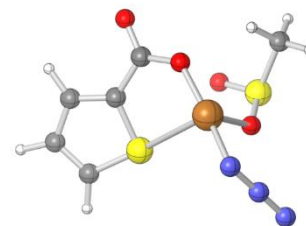

|   |               |               |               |
|---|---------------|---------------|---------------|
| H | 0.4440913988  | 1.2031165148  | -5.5957449289 |
| H | -3.4984580862 | 1.1986629914  | -3.8062451456 |
| N | 1.7528087061  | -1.6237341826 | -0.8882681479 |
| N | 2.8802640519  | -1.2377547385 | -0.79252319   |
| N | 3.9650229703  | -0.9132016149 | -0.7117934036 |
| S | 0.9664014261  | 2.295160257   | 0.3852919703  |
| O | 1.4636886377  | 0.9809365649  | -0.1563354804 |
| O | 0.0753325364  | 3.0574840953  | -0.4653448204 |
| C | 0.1221576775  | 1.9042116741  | 1.9070346342  |
| H | -0.7508240367 | 1.3194637385  | 1.6283455307  |
| H | 0.8137464175  | 1.3489646305  | 2.5305590676  |
| H | -0.1588330514 | 2.8458943911  | 2.3657041883  |

# **HA1<sup>+</sup>**

E(RPW6B95D3) = -1248.42422538

Charge = 1      Multiplicity = 1

|   |               |               |               |
|---|---------------|---------------|---------------|
| C | -7.9428478785 | -1.3211033737 | -0.7664793289 |
| C | -6.8123268605 | -1.7857480325 | -0.1656122015 |
| C | -5.7569147963 | -0.8967149859 | 0.0802412081  |
| C | -5.8568902398 | 0.4718776889  | -0.2791555469 |
| C | -7.0480559417 | 0.9048951974  | -0.9120852234 |
| C | -8.061734952  | 0.0312686265  | -1.1472275797 |
| C | -4.7766763885 | 1.3226596278  | -0.0133005536 |
| C | -3.6175471237 | 0.8197428729  | 0.5920453778  |
| C | -3.559914826  | -0.5566948543 | 0.9261007578  |
| C | -2.4189315581 | -1.1060541341 | 1.5283064333  |

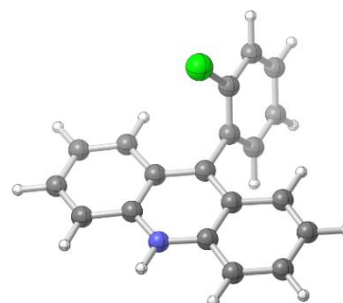



|    |               |               |               |
|----|---------------|---------------|---------------|
| H  | -2.4040443391 | -2.1579380588 | 1.7684313871  |
| C  | -1.3566387381 | -0.2963335343 | 1.7933395708  |
| C  | -1.3918775864 | 1.0777357845  | 1.4778722298  |
| C  | -2.4914876318 | 1.6229075088  | 0.8954945922  |
| H  | -8.7585257608 | -1.9993760858 | -0.9605924719 |
| H  | -6.7091528684 | -2.8202166213 | 0.122216982   |
| H  | -7.133112578  | 1.9365391568  | -1.2092969096 |
| H  | -8.9636078257 | 0.3673585766  | -1.6323483189 |
| H  | -0.4745536513 | -0.7104986703 | 2.2552624746  |
| H  | -0.5377960978 | 1.6946870197  | 1.7050545965  |
| H  | -2.5219028732 | 2.6736848267  | 0.6589614294  |
| N  | -4.6247469379 | -1.3340787172 | 0.6590606827  |
| C  | -4.8731719438 | 2.7591403828  | -0.348822053  |
| C  | -4.1940513766 | 3.3104827759  | -1.4278598309 |
| C  | -5.662632841  | 3.5960680411  | 0.4317123999  |
| C  | -4.2880148767 | 4.6568584219  | -1.7247769566 |
| C  | -5.7569274914 | 4.9447355685  | 0.149159584   |
| H  | -6.1977330276 | 3.1761885512  | 1.2691737756  |
| C  | -5.069050128  | 5.4737210101  | -0.9290755659 |
| H  | -3.7559580098 | 5.0552223968  | -2.5730359397 |
| H  | -6.3687183649 | 5.5798120801  | 0.7695015773  |
| H  | -5.1405351632 | 6.5250831619  | -1.1584463192 |
| Cl | -3.2263711487 | 2.2959389565  | -2.4477027334 |
| H  | -4.5682346787 | -2.3138187308 | 0.9058867919  |

**HA1**

E(UPW6B95D3) = -1248.56334669

Charge = 0      Multiplicity = 2

|   |               |               |               |
|---|---------------|---------------|---------------|
| C | -8.0003303956 | -1.3126863304 | -0.7524693466 |
| C | -6.8409264465 | -1.7687007243 | -0.1557495129 |
| C | -5.7852085222 | -0.8977571906 | 0.0780534727  |
| C | -5.8753618892 | 0.4694145728  | -0.2792650641 |
| C | -7.0662372146 | 0.8926393157  | -0.8962628123 |
| C | -8.1081819992 | 0.0223791164  | -1.1263006767 |
| C | -4.7719054923 | 1.325474141   | -0.0235768285 |
| C | -3.598312903  | 0.8079710015  | 0.5855550829  |
| C | -3.5428686034 | -0.5650621928 | 0.9223017121  |
| C | -2.4121950064 | -1.110347076  | 1.5163682665  |
| H | -2.4035419293 | -2.1635717601 | 1.7565005154  |
| C | -1.319969259  | -0.3120197262 | 1.7946300702  |
| C | -1.3545395503 | 1.0432751243  | 1.484020674   |
| C | -2.4717142535 | 1.589794174   | 0.8939109657  |
| H | -8.8152066829 | -1.9966274479 | -0.9305481342 |
| H | -6.7386188739 | -2.8044046008 | 0.1334091304  |
| H | -7.1551049304 | 1.9240338205  | -1.1972252108 |
| H | -9.0084096494 | 0.3793437883  | -1.6018586221 |
| H | -0.4453315161 | -0.7434262594 | 2.255552415   |
| H | -0.5050291627 | 1.6702104137  | 1.7059796196  |
| H | -2.4921458407 | 2.6424215313  | 0.6596159978  |
| N | -4.6315416654 | -1.3502384444 | 0.6570910814  |
| C | -4.8623803511 | 2.7586027008  | -0.3576354433 |
| C | -4.1436022045 | 3.3383107956  | -1.3993589983 |
| C | -5.6950402468 | 3.5983817414  | 0.379531088   |

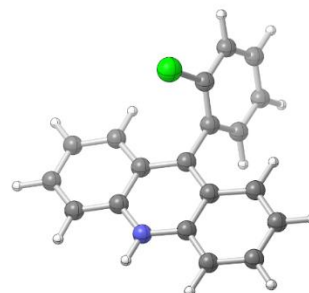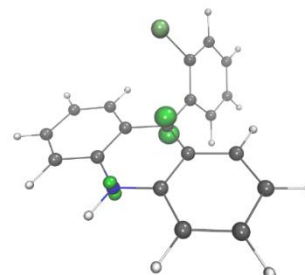

|    |               |               |               |
|----|---------------|---------------|---------------|
| C  | -4.2298959285 | 4.6876484336  | -1.6912885094 |
| C  | -5.7961525546 | 4.9476527424  | 0.1010244382  |
| H  | -6.2656970138 | 3.1695582916  | 1.1892462403  |
| C  | -5.058850317  | 5.4947027455  | -0.9355729354 |
| H  | -3.6559511016 | 5.0951816718  | -2.5076437451 |
| H  | -6.4460061434 | 5.5714315221  | 0.6945323372  |
| H  | -5.127931306  | 6.5472376842  | -1.1615118399 |
| Cl | -3.1161108839 | 2.3507679686  | -2.3921851666 |
| H  | -4.5790884925 | -2.3249353645 | 0.9014309888  |

**NaN<sub>3</sub>**

E(RPW6B95D3) = -326.982037351

Charge = 0      Multiplicity = 1

|    |               |              |              |
|----|---------------|--------------|--------------|
| N  | -0.3001636274 | 0.3370935541 | 1.4317159644 |
| N  | 0.846065844   | 0.5421730688 | 1.5871540705 |
| N  | 1.9726925196  | 0.7434783161 | 1.7398998803 |
| Na | -2.4087338562 | -0.013259469 | 1.1617228948 |

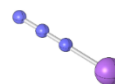**NaOBz**

E(RPW6B95D3) = -583.476036956

Charge = 0      Multiplicity = 1

|   |               |              |              |
|---|---------------|--------------|--------------|
| C | -1.1860576412 | 3.1930307325 | 0.7011325236 |
| C | -0.5368649894 | 1.8452866382 | 0.5606563864 |
| C | -1.3128798949 | 0.7096293182 | 0.371914094  |
| C | 0.8448972913  | 1.72272864   | 0.6183380997 |

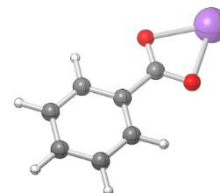

|    |               |               |              |
|----|---------------|---------------|--------------|
| C  | -0.7167459261 | -0.5320586068 | 0.2426758468 |
| H  | -2.3849731249 | 0.817050946   | 0.3288134043 |
| C  | 1.4435792999  | 0.4822472603  | 0.4891753895 |
| H  | 1.4373029072  | 2.6117015156  | 0.7651593104 |
| C  | 0.6630945137  | -0.6474236594 | 0.3010879349 |
| H  | -1.3262079309 | -1.4108745758 | 0.0962635685 |
| H  | 2.5184882368  | 0.3944755199  | 0.5347886534 |
| H  | 1.1294133928  | -1.6157325843 | 0.2000904757 |
| O  | -0.4423532842 | 4.1912903119  | 0.8744981757 |
| O  | -2.4398482824 | 3.2538458393  | 0.6382732776 |
| Na | -2.2822295678 | 5.4701937045  | 0.9381628594 |

**MeSO<sub>2</sub>N<sub>3</sub>**

E(RPW6B95D3) = -753.632418892

Charge = 0      Multiplicity = 1

|   |               |              |               |
|---|---------------|--------------|---------------|
| S | 0.5939091706  | 2.3341077126 | 0.1161365338  |
| O | 2.0004024962  | 2.5206330245 | 0.241802793   |
| O | -0.320227738  | 3.2954208173 | 0.6511020931  |
| C | 0.1861212227  | 1.993563626  | -1.5526232353 |
| H | 0.8134348415  | 1.181942276  | -1.9036764076 |
| H | -0.8660102941 | 1.7355782454 | -1.6118070468 |
| H | 0.3864073155  | 2.9036793309 | -2.1120392011 |
| N | 0.3072411023  | 0.8375801277 | 0.8695227408  |
| N | -0.8332519374 | 0.7052377379 | 1.3176538014  |
| N | -1.8350601794 | 0.5051541018 | 1.7610329287  |

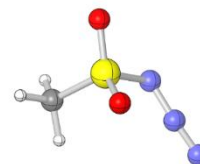

**MeSO<sub>2</sub>NMe<sub>2</sub>**

E(RPW6B95D3) = -723.985046360

Charge = 0      Multiplicity = 1

|   |               |               |               |
|---|---------------|---------------|---------------|
| S | 0.4130438969  | 2.5512468419  | -0.0153193732 |
| O | 1.7965155521  | 2.6040055903  | 0.3606127867  |
| O | -0.3992443349 | 3.7256196171  | 0.1233272531  |
| C | 0.3298195112  | 2.0338710543  | -1.6973915083 |
| H | 0.8761334525  | 1.1030165897  | -1.8108061228 |
| H | -0.7106744509 | 1.90934049    | -1.979733668  |
| H | 0.7885896147  | 2.8106373533  | -2.3013593706 |
| N | -0.2842223688 | 1.3745477338  | 0.8750156159  |
| C | -1.7257039749 | 1.2214069686  | 0.7505229856  |
| H | -1.9993805307 | 0.6339150481  | -0.1284398698 |
| H | -2.0882900146 | 0.706408728   | 1.635503848   |
| H | -2.1973209936 | 2.1944940796  | 0.6981901572  |
| C | 0.4407562603  | 0.1182680952  | 0.9892161733  |
| H | 0.0780797183  | -0.4014595399 | 1.8713623034  |
| H | 0.2843201947  | -0.5238743984 | 0.119828511   |
| H | 1.4986943377  | 0.3126166985  | 1.1117969187  |

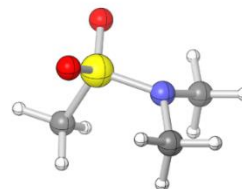**MeSO<sub>2</sub>NHPh**

E(RPW6B95D3) = -876.693466911

Charge = 0      Multiplicity = 1

|   |              |              |               |
|---|--------------|--------------|---------------|
| S | 1.0379182079 | 2.0616131631 | 0.3069542454  |
| O | 2.1849289657 | 1.5803613758 | -0.4036218391 |

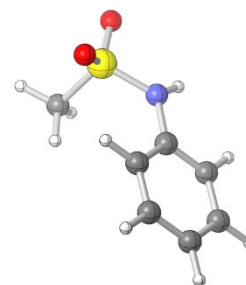

|   |               |               |               |
|---|---------------|---------------|---------------|
| O | 1.2129457666  | 2.7484594342  | 1.5509682896  |
| C | 0.0921424282  | 3.0952064593  | -0.752951508  |
| H | -0.0731411624 | 2.5773673821  | -1.6914814901 |
| H | -0.8497159595 | 3.3311539298  | -0.2677571714 |
| H | 0.6658665759  | 4.0034406864  | -0.9116514647 |
| N | 0.1216337827  | 0.7295781639  | 0.5647385317  |
| H | 0.3321256886  | -0.0044509365 | -0.0953789292 |
| C | -1.1779719621 | 0.7028337275  | 1.1011224717  |
| C | -1.6627260197 | 1.6882044252  | 1.9523547421  |
| C | -1.9895137505 | -0.3765952505 | 0.7683455762  |
| C | -2.9499075317 | 1.5865157759  | 2.4516632596  |
| H | -1.0404790177 | 2.5197012895  | 2.2358307292  |
| C | -3.2674318834 | -0.4704612217 | 1.2832755242  |
| H | -1.610887263  | -1.1409420379 | 0.1055981157  |
| C | -3.7591579488 | 0.5130125395  | 2.1258058501  |
| H | -3.3157959825 | 2.3587065024  | 3.1108404167  |
| H | -3.8824585651 | -1.3165044277 | 1.0177402204  |
| H | -4.7586695892 | 0.4410118597  | 2.5243985701  |

## MeSO<sub>2</sub>H

E(RPW6B95D3) = -589.781494852

Charge = 0      Multiplicity = 1

|   |               |              |               |
|---|---------------|--------------|---------------|
| S | -0.5874389593 | 2.1694317384 | 0.0412973061  |
| O | 0.9734947852  | 1.8586404008 | -0.3561569044 |
| O | -1.2766042293 | 2.686230697  | -1.1449597032 |
| C | -0.9928226249 | 0.440894007  | 0.1283504227  |

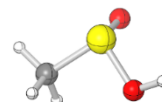

|   |               |               |               |
|---|---------------|---------------|---------------|
| H | -2.0616776009 | 0.3735451344  | 0.3073192712  |
| H | -0.7356324869 | -0.0129970869 | -0.8248159422 |
| H | -0.4441679617 | -0.0189518925 | 0.9442267836  |
| H | 1.4949784577  | 2.6563745617  | -0.1920464938 |

**CuOBz**

E(RPW6B95D3) = -2062.35333283

Charge = 0      Multiplicity = 1

|    |               |               |               |
|----|---------------|---------------|---------------|
| Cu | -2.1258657771 | -0.2683748098 | 1.1617188466  |
| O  | -3.6518662287 | -1.6857241966 | 1.0148894424  |
| O  | -3.451544875  | -0.263900443  | -0.6580351908 |
| C  | -4.0169303461 | -1.2349494449 | -0.1072113415 |
| C  | -5.1675662426 | -1.8925314744 | -0.7963093878 |
| C  | -5.5347907242 | -1.4883951792 | -2.0732687501 |
| C  | -5.8771088316 | -2.9089392065 | -0.1704583093 |
| C  | -6.5966044163 | -2.0953082902 | -2.718680566  |
| H  | -4.9762338189 | -0.6980849671 | -2.5486527186 |
| C  | -6.9435753522 | -3.5117510155 | -0.8128494626 |
| H  | -5.584195087  | -3.2158660023 | 0.8207211218  |
| C  | -7.3034880693 | -3.1068527328 | -2.0883000203 |
| H  | -6.8740929638 | -1.7801655853 | -3.7129604251 |
| H  | -7.4947313101 | -4.2982662935 | -0.3204812741 |
| H  | -8.133842077  | -3.5791545291 | -2.5908510447 |

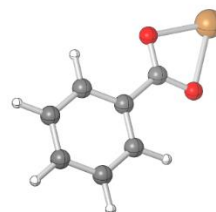**CuTC**

E(RPW6B95D3) = -2383.31824229

Charge = 0      Multiplicity = 1

|    |               |               |               |
|----|---------------|---------------|---------------|
| Cu | -0.1555170837 | -0.6751860911 | -0.7113634955 |
| O  | -1.7821456914 | 0.3502678093  | -0.6307785127 |
| C  | -2.4976031079 | 0.6293933925  | -1.6585134803 |
| O  | -3.6949690253 | 0.8800044835  | -1.6294051264 |
| S  | -0.0845099323 | 0.5877993073  | -3.0721684663 |
| C  | -1.7966166329 | 0.6649709188  | -2.9742661348 |
| C  | -2.3410368305 | 0.768666699   | -4.2183849037 |
| C  | -1.3747573404 | 0.7672411915  | -5.2499041947 |
| H  | -1.6093305972 | 0.8429824628  | -6.2990145284 |
| C  | -0.1028853264 | 0.6658799628  | -4.7768909573 |
| H  | 0.8180419698  | 0.6583779836  | -5.3321381661 |
| H  | -3.4044309019 | 0.8368005401  | -4.3757219038 |

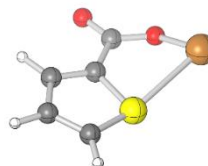

## PhNH<sub>2</sub>

E(RPW6B95D3) = -288.108815802

Charge = 0      Multiplicity = 1

|   |               |              |               |
|---|---------------|--------------|---------------|
| C | -0.6814176689 | 1.184318352  | -0.0744068048 |
| C | 0.7066847329  | 1.2184799337 | 0.0626465414  |
| C | 1.3349626975  | 2.4608240223 | 0.1563207284  |
| C | 0.5945031746  | 3.6268678545 | 0.1158089083  |
| C | -0.7844311729 | 3.5889779878 | -0.0189105559 |
| C | -1.4119343297 | 2.3567356648 | -0.1138807579 |
| H | -1.1805150728 | 0.2289231773 | -0.1487060542 |
| H | 2.409413501   | 2.5018378885 | 0.2625313941  |

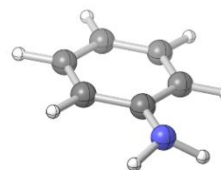



|   |               |               |               |
|---|---------------|---------------|---------------|
| H | 1.1036450481  | 4.5763666794  | 0.1887299254  |
| H | -1.3585865763 | 4.5013964879  | -0.0509521099 |
| H | -2.4850400572 | 2.3045159939  | -0.2226994826 |
| N | 1.435962484   | 0.0494520394  | 0.1590375843  |
| H | 1.0032191163  | -0.7657513996 | -0.2392712206 |
| H | 2.4096734954  | 0.124304789   | -0.079027208  |

**BzOH**

E(RPW6B95D3) = -421.539540494

Charge = 0      Multiplicity = 1

|   |               |               |              |
|---|---------------|---------------|--------------|
| C | -1.2455510036 | 3.1390775623  | 0.6794979151 |
| C | -0.5514812129 | 1.8413881246  | 0.55123079   |
| C | -1.3239761931 | 0.6995860239  | 0.3779255169 |
| C | 0.8339872918  | 1.7425789945  | 0.6000112626 |
| C | -0.7154829064 | -0.5334556423 | 0.2532828002 |
| H | -2.3975007483 | 0.7944064796  | 0.3424602201 |
| C | 1.4391845782  | 0.5061468719  | 0.475490636  |
| H | 1.4312560126  | 2.6291215378  | 0.7352070378 |
| C | 0.6664393291  | -0.6304522385 | 0.3020667725 |
| H | -1.3158899046 | -1.4193818194 | 0.1180712895 |
| H | 2.5144499902  | 0.4286157597  | 0.5135681341 |
| H | 1.1420070171  | -1.5942501778 | 0.2044635316 |
| O | -0.4087548633 | 4.1724409546  | 0.8278319918 |
| O | -2.4425070295 | 3.2800584661  | 0.655822122  |
| H | -0.9434946272 | 4.9759823427  | 0.9055884996 |

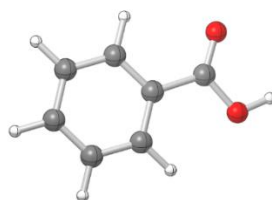

## HF

E(RPW6B95D3) = -100.602577177

Charge = 0      Multiplicity = 1

|   |               |          |            |
|---|---------------|----------|------------|
| F | -0.5693549466 | 1.173134 | 0.02310689 |
| H | -1.4944581934 | 1.173134 | 0.02310689 |

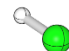

## *t*BuO<sub>2</sub>Bz

E(RPW6B95D3) = -654.298568104

Charge = 0      Multiplicity = 1

|   |               |               |               |
|---|---------------|---------------|---------------|
| C | -1.6105658961 | 3.3045679898  | -0.0710394326 |
| C | -0.7611445054 | 2.2166935891  | 0.4682102611  |
| C | -1.3944086072 | 1.0341661115  | 0.8296559758  |
| C | 0.615250522   | 2.3427383328  | 0.62071536    |
| C | -0.6581059398 | -0.0158513653 | 1.3416737485  |
| H | -2.4621774669 | 0.953269868   | 0.7039092251  |
| C | 1.3476430655  | 1.2881755421  | 1.1323423019  |
| H | 1.1112358631  | 3.2562966018  | 0.3379273276  |
| C | 0.7134725768  | 0.1106089499  | 1.4932455276  |
| H | -1.1524149167 | -0.9327169941 | 1.6221599959  |
| H | 2.4156498376  | 1.3851567974  | 1.2489109832  |
| H | 1.2892839391  | -0.710121569  | 1.8924343452  |
| O | -0.8620089348 | 4.4082723925  | -0.3048458939 |
| O | -2.7872933232 | 3.227980205   | -0.2745153608 |
| C | -1.7263901234 | 6.5485456969  | 0.0733186212  |
| C | -2.5271817791 | 7.5613261549  | -0.7195130046 |

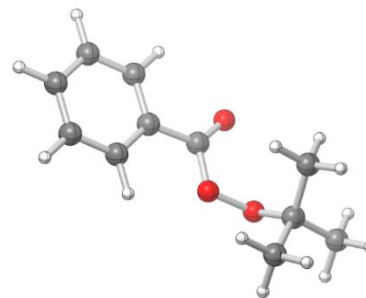

|   |               |              |               |
|---|---------------|--------------|---------------|
| H | -3.5029527085 | 7.1613256891 | -0.9821052507 |
| H | -2.6705140814 | 8.4537334567 | -0.1165733745 |
| H | -2.0027575651 | 7.840735058  | -1.629618589  |
| C | -2.4700887175 | 6.1025141598 | 1.3146319462  |
| H | -2.607093133  | 6.9516918892 | 1.9794847124  |
| H | -3.4453390053 | 5.7013363632 | 1.0550495664  |
| H | -1.9106126579 | 5.344833197  | 1.8580894452  |
| C | -0.3413990561 | 7.0669446475 | 0.4001048422  |
| H | -0.4196866433 | 7.9495290223 | 1.0299304691  |
| H | 0.2381770518  | 6.3203128291 | 0.9357315026  |
| H | 0.1890422215  | 7.3375785981 | -0.509507049  |
| O | -1.6334956468 | 5.4576877168 | -0.8791756421 |

***t*BuO Radical**

E(UPW6B95D3) = -233.390589832

Charge = 0      Multiplicity = 2

|   |               |              |               |
|---|---------------|--------------|---------------|
| O | -0.4875714228 | 4.4196324795 | 0.9547522457  |
| C | -1.0600196365 | 5.5217686673 | 0.3898609742  |
| C | -1.4287410413 | 5.2716191077 | -1.067936132  |
| H | -2.0751699904 | 4.4019533871 | -1.1503420489 |
| H | -1.943578719  | 6.1332364123 | -1.4860733824 |
| H | -0.5297712125 | 5.0934404227 | -1.6535509984 |
| C | -2.3509964261 | 5.6926431905 | 1.2314685645  |
| H | -2.8759741856 | 6.5621673711 | 0.8433379494  |
| H | -2.9862661996 | 4.8178451049 | 1.1382054992  |
| H | -2.1069240467 | 5.85670066   | 2.2760102434  |

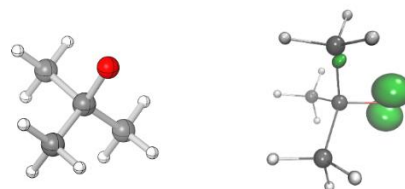

|   |               |              |              |
|---|---------------|--------------|--------------|
| C | -0.1757226273 | 6.7526947994 | 0.5528219929 |
| H | -0.6718651016 | 7.6359319448 | 0.157841525  |
| H | 0.0525016267  | 6.9178115288 | 1.6023975222 |
| H | 0.7574685527  | 6.6142863639 | 0.0116651952 |

***t*BuOH**

E(RPW6B95D3) = -234.066727416

Charge = 0      Multiplicity = 1

|   |               |              |               |
|---|---------------|--------------|---------------|
| O | -0.4100383995 | 4.4314479017 | 1.0181893764  |
| C | -1.0774575818 | 5.5568522667 | 0.435252363   |
| C | -1.3822767005 | 5.2630922106 | -1.0238070453 |
| H | -1.9934906021 | 4.3675668784 | -1.1090406545 |
| H | -1.9159659169 | 6.0909267038 | -1.485574016  |
| H | -0.4601872745 | 5.1049487344 | -1.5820120072 |
| C | -2.3551613419 | 5.7223353918 | 1.2312464992  |
| H | -2.9339998006 | 6.561832157  | 0.8548283535  |
| H | -2.9639273884 | 4.8238800386 | 1.160563692   |
| H | -2.1273487903 | 5.9025759329 | 2.2792929092  |
| C | -0.1962586899 | 6.787728621  | 0.5626945425  |
| H | -0.6894612232 | 7.6654928686 | 0.1508001513  |
| H | 0.0351266762  | 6.9801355924 | 1.6078223876  |
| H | 0.7397306283  | 6.644509085  | 0.0238620052  |
| H | 0.413515845   | 4.2977656773 | 0.5393364131  |

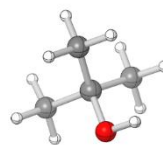**A1**

E(RPW6B95D3) = -1247.96760393

Charge = 0      Multiplicity = 1

|   |               |               |               |
|---|---------------|---------------|---------------|
| C | -7.9348919406 | -1.3268358786 | -0.7669072648 |
| C | -6.803945557  | -1.7766712762 | -0.16670795   |
| C | -5.721067333  | -0.896537858  | 0.0935284215  |
| C | -5.8476853263 | 0.4782942227  | -0.2802285898 |
| C | -7.0441570563 | 0.905293237   | -0.9141807869 |
| C | -8.0552355729 | 0.0302729443  | -1.1495558175 |
| C | -4.7771352669 | 1.3344054275  | -0.0155293525 |
| C | -3.6313061258 | 0.8173627722  | 0.5922391302  |
| C | -3.6084164929 | -0.5742938721 | 0.917538606   |
| C | -2.4471013676 | -1.1124496658 | 1.5313570506  |
| H | -2.4498243572 | -2.1650981159 | 1.7680242398  |
| C | -1.3781526629 | -0.3224620816 | 1.8048332166  |
| C | -1.402403183  | 1.0563611654  | 1.4869669203  |
| C | -2.4950326221 | 1.6094238809  | 0.9010795748  |
| H | -8.7510118798 | -2.0055952898 | -0.9611647163 |
| H | -6.6899700475 | -2.8085619794 | 0.1270841847  |
| H | -7.137126932  | 1.937424022   | -1.211943432  |
| H | -8.9583321822 | 0.3663373179  | -1.6346609732 |
| H | -0.4998808535 | -0.7425149737 | 2.2703352705  |
| H | -0.543740793  | 1.6681656429  | 1.7155169445  |
| H | -2.5109820953 | 2.6615757758  | 0.6639162039  |
| N | -4.6302078094 | -1.3923717232 | 0.6731609312  |
| C | -4.8670007089 | 2.7731536129  | -0.3526496461 |
| C | -4.2073320626 | 3.324457055   | -1.4440680747 |
| C | -5.6328697428 | 3.623807419   | 0.4374169308  |

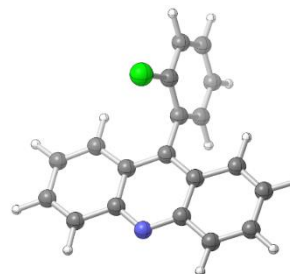

|    |               |              |               |
|----|---------------|--------------|---------------|
| C  | -4.2958326234 | 4.671678968  | -1.7432080096 |
| C  | -5.7289481256 | 4.9725730252 | 0.1533648052  |
| H  | -6.153404637  | 3.2098125915 | 1.2872213838  |
| C  | -5.0584602812 | 5.4966693867 | -0.9383348215 |
| H  | -3.7728990441 | 5.0641399376 | -2.6000391298 |
| H  | -6.3262051146 | 5.6122136452 | 0.7836478519  |
| H  | -5.1275931826 | 6.5480364836 | -1.1692743129 |
| Cl | -3.2539759499 | 2.3090115106 | -2.4797310886 |

**TS1**

E(RPW6B95D3) = -2786.27577992

Charge = 0      Multiplicity = 1

|    |               |               |               |
|----|---------------|---------------|---------------|
| Cu | 1.9943157407  | 2.2445122407  | 0.6300881457  |
| O  | 0.4209071584  | 1.320135665   | -0.1792898051 |
| O  | 0.5456761339  | 2.9825698046  | -1.6673252057 |
| C  | 0.0260849147  | 1.9420981547  | -1.2011902793 |
| C  | -1.165164487  | 1.4035009153  | -1.9234213156 |
| C  | -1.6416556537 | 2.0445233297  | -3.0598432471 |
| C  | -1.8009512914 | 0.2622467682  | -1.4527404372 |
| C  | -2.7480162422 | 1.5464178081  | -3.7209771116 |
| H  | -1.1408721026 | 2.9297796088  | -3.4160444419 |
| C  | -2.9080049282 | -0.2327200882 | -2.1165682978 |
| H  | -1.42214008   | -0.2258064563 | -0.569798447  |
| C  | -3.3821055195 | 0.4081283854  | -3.2498177394 |
| H  | -3.1168583884 | 2.0459868083  | -4.6032674793 |
| H  | -3.4021202163 | -1.1187858597 | -1.7494802116 |

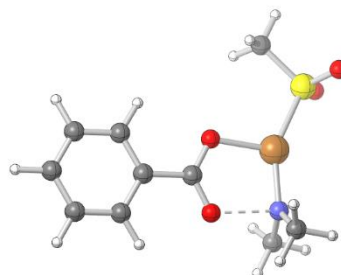

|   |               |               |               |
|---|---------------|---------------|---------------|
| H | -4.2469676348 | 0.0203957782  | -3.7658992238 |
| N | 2.1971939253  | 3.6584986934  | -0.5405284586 |
| C | 1.6197844386  | 4.9455914445  | -0.2961619494 |
| H | 1.3215500721  | 5.4435715389  | -1.2153841391 |
| H | 0.7928208402  | 4.8653019577  | 0.3992755894  |
| H | 2.405154054   | 5.5413313715  | 0.1802246909  |
| C | 3.1032385096  | 3.618883622   | -1.6486492878 |
| H | 4.0272163347  | 4.0912194299  | -1.2999320456 |
| H | 3.3317327214  | 2.5940335015  | -1.9158322281 |
| H | 2.732997408   | 4.1809125314  | -2.5024437604 |
| S | 2.590017976   | 1.1667438613  | 2.4838052295  |
| O | 2.4062649388  | 2.0108844503  | 3.6716541512  |
| O | 3.911159365   | 0.5398129135  | 2.3479531683  |
| C | 1.4515708058  | -0.1928657146 | 2.7007726109  |
| H | 1.7515344614  | -0.7113290011 | 3.608785891   |
| H | 0.4449665378  | 0.2003826902  | 2.7999741863  |
| H | 1.5216052979  | -0.8532705424 | 1.8424616563  |

**TS2**

E(RPW6B95D3) = -2786.30432234

Charge = 0      Multiplicity = 1

|    |               |               |               |
|----|---------------|---------------|---------------|
| Cu | -1.2530666675 | 0.8539608681  | -0.370810643  |
| O  | -2.4135495978 | -0.587006042  | -0.753096206  |
| O  | -2.3673677236 | 0.3208641701  | -2.7755484865 |
| C  | -2.741178274  | -0.5545599412 | -1.997958048  |
| C  | -3.6140449632 | -1.6702280511 | -2.4704347234 |

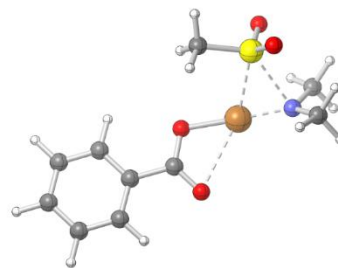

|   |               |               |               |
|---|---------------|---------------|---------------|
| C | -3.9913246977 | -1.7189662018 | -3.8060819121 |
| C | -4.0459597674 | -2.6627353513 | -1.6004688708 |
| C | -4.789931686  | -2.748444579  | -4.2679859511 |
| H | -3.6476775392 | -0.9422717804 | -4.4705498253 |
| C | -4.8460807625 | -3.6924850667 | -2.0620229974 |
| H | -3.7496845044 | -2.6188695908 | -0.5650210422 |
| C | -5.2181614725 | -3.7369076814 | -3.3959314046 |
| H | -5.0785696243 | -2.7820408294 | -5.3073073893 |
| H | -5.1796692449 | -4.4615808458 | -1.3824495866 |
| H | -5.8412393271 | -4.5413321135 | -3.75606054   |
| N | -0.1278564094 | 2.2233541899  | 0.0462474955  |
| C | -0.320823208  | 3.0963709702  | 1.1709392005  |
| H | 0.549352001   | 3.1426364396  | 1.8264703136  |
| H | -0.5039375107 | 4.0988170802  | 0.7751123579  |
| H | -1.1943475776 | 2.8032882912  | 1.7421773614  |
| C | 1.1300158228  | 2.3937992745  | -0.6273724696 |
| H | 1.9749647004  | 2.4381590044  | 0.0587842939  |
| H | 1.2869821257  | 1.6054132893  | -1.3555632452 |
| H | 1.0792782186  | 3.3407498242  | -1.1712081038 |
| S | 0.3345190376  | 0.1855736168  | 1.2929590875  |
| O | -0.0586078872 | 0.671566432   | 2.5939346304  |
| O | 1.7311689287  | 0.1342768525  | 0.9344899923  |
| C | -0.268453949  | -1.4868286981 | 1.1662942471  |
| H | 0.3055151556  | -2.041302819  | 1.9060850536  |
| H | -1.3264336518 | -1.494180927  | 1.3945278892  |
| H | -0.0752556547 | -1.8490921244 | 0.1640246821  |



# TS3

E(RPW6B95D3) = -2786.26523090

Charge = 0      Multiplicity = 1

|    |               |               |               |
|----|---------------|---------------|---------------|
| Cu | 1.5692513722  | 1.7714413633  | 0.3645342413  |
| O  | 0.0772204611  | 1.1346889711  | -0.8022474649 |
| O  | 0.0262740203  | 3.0706677301  | -1.941990607  |
| C  | -0.3633674655 | 1.9114610912  | -1.7054522538 |
| C  | -1.4645956555 | 1.3706796354  | -2.5688072115 |
| C  | -1.9597742273 | 2.1294367512  | -3.6210407048 |
| C  | -1.9945744899 | 0.1120874787  | -2.3205392444 |
| C  | -2.9743136111 | 1.6338142887  | -4.4186877381 |
| H  | -1.5406284674 | 3.1056613408  | -3.8046516281 |
| C  | -3.0124041156 | -0.3818166769 | -3.1163428756 |
| H  | -1.6023726052 | -0.4685867437 | -1.5015346952 |
| C  | -3.502654606  | 0.3777662009  | -4.1663991789 |
| H  | -3.3542272852 | 2.2260534579  | -5.2369422474 |
| H  | -3.4238107581 | -1.3597599349 | -2.9189050276 |
| H  | -4.2958768658 | -0.0087010569 | -4.7880077306 |
| N  | 1.6542047636  | 3.5021304349  | -0.4440166425 |
| C  | 1.1462044454  | 4.5957475909  | 0.3050495961  |
| H  | 1.7833269142  | 4.6815544299  | 1.2001307657  |
| H  | 1.2013149356  | 5.5373589188  | -0.2369332216 |
| H  | 0.1385388496  | 4.3836409901  | 0.6483873411  |
| C  | 2.7761957087  | 3.8138164195  | -1.2606563099 |
| H  | 2.9674661232  | 3.0122946008  | -1.9657624687 |
| H  | 2.6612855059  | 4.7728599757  | -1.7626638161 |

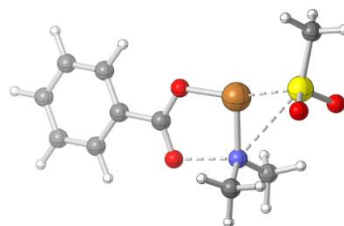

|   |              |               |               |
|---|--------------|---------------|---------------|
| H | 3.6487282034 | 3.8943415875  | -0.5960692392 |
| S | 3.1224167061 | 2.0166652613  | 1.9227304029  |
| O | 2.745511332  | 3.1227158745  | 2.8087767044  |
| O | 4.4379797089 | 2.1276742292  | 1.2881908343  |
| C | 3.2046359753 | 0.5742428475  | 2.9688707582  |
| H | 3.9800794534 | 0.7656229234  | 3.7069988911  |
| H | 2.2409235226 | 0.4380329064  | 3.4481760622  |
| H | 3.4583266081 | -0.2843245873 | 2.3561937076  |

**TS4**

E(RPW6B95D3) = -2939.02508232

Charge = 0      Multiplicity = 1

|    |              |              |              |
|----|--------------|--------------|--------------|
| Cu | -2.004252321 | -1.188145027 | 1.546089479  |
| O  | -3.494437993 | -2.121380787 | 0.834981745  |
| O  | -3.521930147 | -0.324211119 | -0.460136633 |
| C  | -3.985777361 | -1.414245695 | -0.118603412 |
| C  | -5.187461883 | -1.975337412 | -0.802799824 |
| C  | -5.827617325 | -1.22368209  | -1.779568249 |
| C  | -5.679299472 | -3.231627116 | -0.47302785  |
| C  | -6.949060972 | -1.719993004 | -2.417512877 |
| H  | -5.43491967  | -0.249898966 | -2.025217579 |
| C  | -6.79783182  | -3.730903441 | -1.115588772 |
| H  | -5.177430486 | -3.808823406 | 0.28652291   |
| C  | -7.434840124 | -2.975189809 | -2.086712356 |
| H  | -7.445196356 | -1.129904064 | -3.172678824 |
| H  | -7.174767499 | -4.708950076 | -0.858767371 |

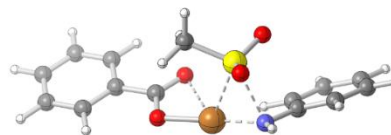

|   |              |              |              |
|---|--------------|--------------|--------------|
| H | -8.309535883 | -3.363962642 | -2.585481415 |
| N | -0.568387374 | -0.303583129 | 2.277514385  |
| S | -2.569616523 | 0.658252639  | 3.089522662  |
| O | -2.329921076 | 1.984223621  | 2.583145485  |
| O | -2.282508648 | 0.338237352  | 4.468596422  |
| C | -4.289317242 | 0.294427522  | 2.798052829  |
| H | -4.493702948 | 0.477626037  | 1.750237815  |
| H | -4.475029876 | -0.734927827 | 3.079508466  |
| H | -4.835023588 | 0.98562705   | 3.437717033  |
| H | -0.345821993 | -0.418713608 | 3.258671068  |
| C | 0.074166597  | 0.760583595  | 1.700819446  |
| C | 0.88638162   | 1.610420283  | 2.458808054  |
| C | -0.096414293 | 1.006056668  | 0.334310205  |
| C | 1.539506896  | 2.660043875  | 1.850454394  |
| H | 0.998130988  | 1.42768319   | 3.517427451  |
| C | 0.532365409  | 2.079382756  | -0.255189574 |
| H | -0.738770918 | 0.349851703  | -0.235689625 |
| C | 1.359403756  | 2.903768077  | 0.496326613  |
| H | 2.178156583  | 3.303599289  | 2.435016479  |
| H | 0.388406964  | 2.272889004  | -1.306566574 |
| H | 1.860533088  | 3.736027688  | 0.027503714  |

**TS5**

E(RPW6B95D3) = -3136.92853840

Charge = 0      Multiplicity = 1

Cu -0.1153319829 -0.9437905853 -0.5199113439

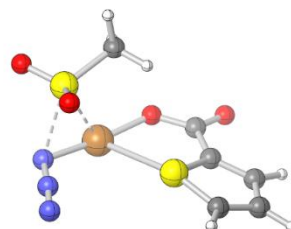

|   |               |               |               |
|---|---------------|---------------|---------------|
| O | -1.8069345832 | -0.1813694663 | -0.4873758437 |
| C | -2.647466509  | 0.0379742292  | -1.4454051831 |
| O | -3.8292497261 | 0.2642306502  | -1.2542885897 |
| S | -0.4718265629 | -0.0453093507 | -3.2533555581 |
| C | -2.1396668608 | 0.030761702   | -2.8422133346 |
| C | -2.9013916293 | 0.1008152856  | -3.9713924455 |
| C | -2.1409520855 | 0.082522457   | -5.159392575  |
| H | -2.5634813935 | 0.1273430628  | -6.1493907788 |
| C | -0.8029467337 | 0.0049406895  | -4.9229349171 |
| H | 0.0035279752  | -0.0166851032 | -5.6341711763 |
| H | -3.9758893661 | 0.1603022582  | -3.9306504869 |
| N | 1.6707408902  | -1.477055077  | -0.5298810729 |
| N | 2.2377705111  | -1.5530223868 | -1.6044379434 |
| N | 2.8284119975  | -1.6280630339 | -2.5576594888 |
| S | 1.6874558113  | 0.7919058707  | -0.137565526  |
| O | 2.4809490901  | 1.0902628984  | -1.2871003603 |
| O | 2.2303775615  | 0.6139998091  | 1.1676358315  |
| C | 0.3507199449  | 1.962737072   | -0.0467909824 |
| H | -0.1302332253 | 2.0112088461  | -1.0152624479 |
| H | -0.3225540929 | 1.649620263   | 0.7409890839  |
| H | 0.8519810696  | 2.8994932694  | 0.1988561388  |

**TS6**

E(RPW6B95D3) = -2786.27859772

Charge = 0      Multiplicity = 1

Cu   1.1029272001   1.4666494312   0.9937309473

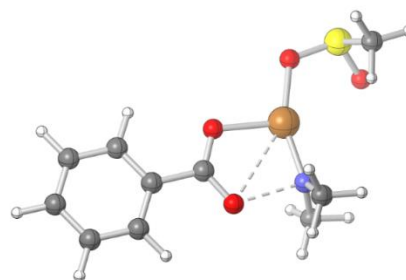

|   |               |               |               |
|---|---------------|---------------|---------------|
| O | -0.3934040166 | 0.8185435382  | -0.1809663846 |
| O | 0.2792726157  | 2.5119520816  | -1.4690009377 |
| C | -0.4676777406 | 1.5368768027  | -1.2074536185 |
| C | -1.5301111318 | 1.2119598255  | -2.2067607502 |
| C | -1.6548602198 | 1.9539716846  | -3.3740665916 |
| C | -2.3982154243 | 0.156697977   | -1.9596136535 |
| C | -2.6427858756 | 1.6400357981  | -4.288557471  |
| H | -0.9762440707 | 2.7711965129  | -3.5566182597 |
| C | -3.3855428548 | -0.1535062916 | -2.8757642553 |
| H | -2.2907620796 | -0.4100491069 | -1.0495170027 |
| C | -3.508542399  | 0.5870525068  | -4.0402399366 |
| H | -2.7379724669 | 2.2166480719  | -5.195486512  |
| H | -4.0598350452 | -0.9730307553 | -2.6814588746 |
| H | -4.2799209635 | 0.3438946061  | -4.754724242  |
| N | 1.7463052504  | 2.8635028369  | 0.0059989601  |
| C | 1.3169269889  | 4.2138237527  | 0.2184502422  |
| H | 1.2690379465  | 4.7824322102  | -0.7062910085 |
| H | 0.3726284279  | 4.2322429452  | 0.7487917726  |
| H | 2.0745306332  | 4.6640814171  | 0.8677065947  |
| C | 2.8207999975  | 2.7270091085  | -0.932531116  |
| H | 3.7218160525  | 3.0413071633  | -0.3962036427 |
| H | 2.9463208345  | 1.6893765718  | -1.2175495431 |
| H | 2.6948684492  | 3.3670653155  | -1.8018334188 |
| S | 1.917717843   | 0.5581281037  | 3.7159030476  |
| O | 1.9894034046  | 2.0119008031  | 4.0082281607  |
| O | 1.0024000293  | 0.3026239269  | 2.4968644056  |
| C | 3.5200879484  | 0.2149675229  | 2.9747273593  |

|   |              |               |              |
|---|--------------|---------------|--------------|
| H | 3.638611836  | 0.9001158785  | 2.1353557835 |
| H | 4.2942189693 | 0.3902279876  | 3.7165452748 |
| H | 3.5494067815 | -0.8168613468 | 2.6363967706 |

## TS7

E(RPW6B95D3) = -2786.28375048

Charge = 0      Multiplicity = 1

|    |           |           |           |
|----|-----------|-----------|-----------|
| Cu | -1.094162 | 0.581598  | 0.260502  |
| O  | -2.286171 | -1.179606 | 0.292917  |
| O  | -1.98853  | 0.1157    | -1.434992 |
| C  | -2.52161  | -0.915715 | -0.909447 |
| C  | -3.404909 | -1.773969 | -1.72559  |
| C  | -3.665426 | -1.451375 | -3.051405 |
| C  | -3.977257 | -2.906951 | -1.161537 |
| C  | -4.494707 | -2.257982 | -3.807553 |
| H  | -3.214692 | -0.569498 | -3.477464 |
| C  | -4.805454 | -3.712215 | -1.91992  |
| H  | -3.765236 | -3.144457 | -0.131376 |
| C  | -5.064543 | -3.387826 | -3.242325 |
| H  | -4.697518 | -2.007606 | -4.837209 |
| H  | -5.24964  | -4.592494 | -1.482004 |
| H  | -5.711664 | -4.017176 | -3.833905 |
| N  | -0.261809 | 2.280858  | 0.005027  |
| C  | 0.710995  | 2.344806  | -1.049039 |
| H  | 0.239294  | 2.201101  | -2.026838 |
| H  | 1.171012  | 3.335289  | -1.066572 |

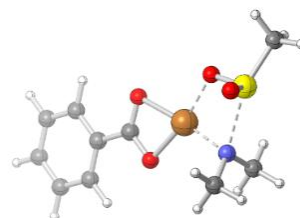

|   |           |          |           |
|---|-----------|----------|-----------|
| H | 1.477732  | 1.591585 | -0.903826 |
| C | -1.256113 | 3.314573 | -0.122582 |
| H | -1.815742 | 3.204018 | -1.056174 |
| H | -1.945068 | 3.285622 | 0.716697  |
| H | -0.774027 | 4.293336 | -0.157319 |
| S | 0.601996  | 1.821461 | 2.276468  |
| O | 1.993668  | 1.443118 | 2.011048  |
| O | -0.375564 | 0.67582  | 2.109534  |
| C | 0.4706    | 2.037052 | 4.061322  |
| H | 0.790033  | 1.111132 | 4.53044   |
| H | 1.125651  | 2.857384 | 4.333562  |
| H | -0.560268 | 2.267877 | 4.305363  |

**TS8**

E(RPW6B95D3) = -2786.26209095

Charge = 0      Multiplicity = 1

|    |               |               |               |
|----|---------------|---------------|---------------|
| Cu | 1.4804661197  | 0.8026253346  | 0.810302858   |
| O  | 0.1436510258  | 0.5074630062  | -0.5270778753 |
| O  | 0.3217722319  | 2.6168068879  | -1.2662904985 |
| C  | -0.1789506138 | 1.4570308783  | -1.2751932371 |
| C  | -1.2580718157 | 1.2185683824  | -2.2782256307 |
| C  | -1.658795228  | 2.2281444738  | -3.143904103  |
| C  | -1.8690014533 | -0.027156082  | -2.3393260099 |
| C  | -2.6638790355 | 1.9922331169  | -4.0630042761 |
| H  | -1.1794914169 | 3.1920445485  | -3.0906214063 |
| C  | -2.8738371609 | -0.2602293345 | -3.2593314613 |

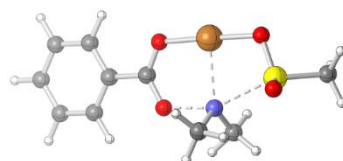

|   |               |               |               |
|---|---------------|---------------|---------------|
| H | -1.5497213073 | -0.802439034  | -1.6622030673 |
| C | -3.2724305851 | 0.7487826108  | -4.1213453021 |
| H | -2.9736649212 | 2.778205905   | -4.7341220107 |
| H | -3.3472393743 | -1.2287172825 | -3.3044064754 |
| H | -4.0576161386 | 0.5661952052  | -4.8388818523 |
| N | 1.7622136315  | 3.0075812279  | 0.02048252    |
| C | 1.1253233821  | 4.2235435296  | 0.4982340767  |
| H | 1.8892255928  | 4.9357886698  | 0.7983973635  |
| H | 0.550195912   | 4.6831359142  | -0.3009087275 |
| H | 0.4810558594  | 3.9939298037  | 1.3397700637  |
| C | 2.7322448271  | 3.2674590565  | -1.0174286385 |
| H | 2.9322164384  | 2.3540196991  | -1.5654572    |
| H | 2.4164677315  | 4.0612148247  | -1.6907432497 |
| H | 3.6593858222  | 3.5729275189  | -0.5276040257 |
| S | 3.397390712   | 2.529356057   | 1.92042405    |
| O | 4.7561175349  | 2.5051496223  | 1.3534604853  |
| O | 2.8273930504  | 1.1389599179  | 2.1542294409  |
| C | 3.6092107532  | 3.1023603387  | 3.6053845483  |
| H | 4.2817856242  | 2.4044935261  | 4.0979924369  |
| H | 4.0417064689  | 4.0972088148  | 3.5760064683  |
| H | 2.6412048027  | 3.1187537124  | 4.0952620459  |

## TS9

E(RPW6B95D3) = -2939.00099263

Charge = 0      Multiplicity = 1

|    |               |              |              |
|----|---------------|--------------|--------------|
| Cu | -1.1353421886 | 0.5663606698 | 0.0828562892 |
|----|---------------|--------------|--------------|

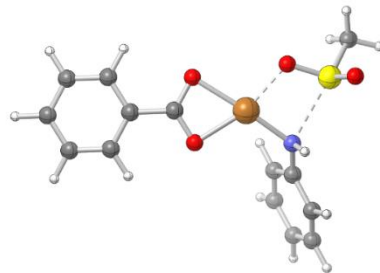



O -2.0288199135 -1.3468278523 0.1496139962  
O -2.3444737836 0.0786737569 -1.4710923714  
C -2.5821440866 -1.0458977195 -0.9371981259  
C -3.5140828879 -1.9892224021 -1.5960274415  
C -4.1231506744 -1.6478203772 -2.7966745032  
C -3.784200341 -3.2182302233 -1.0080011655  
C -4.99686929 -2.5301658599 -3.4040532503  
H -3.9048197396 -0.6908265675 -3.2428413891  
C -4.6580176328 -4.0992170114 -1.6167273117  
H -3.3040501311 -3.4695824897 -0.0758623163  
C -5.2648435296 -3.7554878774 -2.8144431232  
H -5.4699011864 -2.2641548392 -4.3366295178  
H -4.8674024524 -5.0534155779 -1.1585922506  
H -5.9476549537 -4.4435917019 -3.2889516505  
N -0.6433728118 2.4196853224 0.0785108047  
S 0.77499361 1.717538482 2.0928093886  
O 2.2146650237 1.776433622 1.8213245271  
O 0.1257833297 0.4189674723 1.7231885206  
C 0.5813187204 1.7358740479 3.8780018189  
H 1.1182532494 0.8764066954 4.2698925085  
H 1.0067585334 2.6635329976 4.2440987216  
H -0.4773004771 1.676213255 4.1047021177  
H 0.244639591 2.5272437513 -0.4096209084  
C -1.4716034867 3.4399489873 -0.2798456681  
C -2.7973452849 3.4280641981 0.1861936792  
C -1.037532205 4.5082666812 -1.0829167495  
C -3.6562685758 4.4473119136 -0.148014667

|   |               |              |               |
|---|---------------|--------------|---------------|
| H | -3.1205890349 | 2.6009045759 | 0.8004602946  |
| C | -1.9010241742 | 5.5314427116 | -1.3974363892 |
| H | -0.0190303406 | 4.5105623105 | -1.4424573266 |
| C | -3.2111755655 | 5.503207231  | -0.9353564586 |
| H | -4.6757174516 | 4.4303354109 | 0.2034886718  |
| H | -1.5635523748 | 6.352066249  | -2.0107320322 |
| H | -3.8869284835 | 6.3044311577 | -1.1903527218 |

## TS10

E(RPW6B95D3) = -3136.90288346

Charge = 0      Multiplicity = 1

|    |               |               |               |
|----|---------------|---------------|---------------|
| Cu | -0.3772762341 | 0.1260710399  | -0.8788705435 |
| O  | -2.0910259295 | 0.8674874599  | -0.4060273588 |
| C  | -2.9253067067 | 0.6112771315  | -1.3564775215 |
| O  | -4.134475152  | 0.6241694519  | -1.2756357691 |
| S  | -0.7989204439 | 1.1749858079  | -3.0685784015 |
| C  | -2.2320382783 | 0.2613084837  | -2.6331446462 |
| C  | -2.4382565771 | -0.7419478086 | -3.5225702173 |
| C  | -1.4528160882 | -0.7868469643 | -4.5373350449 |
| H  | -1.4543295738 | -1.5033961682 | -5.3419755737 |
| C  | -0.4962194184 | 0.1761323087  | -4.4081872446 |
| H  | 0.3361815338  | 0.3768791994  | -5.0580018632 |
| H  | -3.259240909  | -1.4344423463 | -3.4409720683 |
| N  | 1.3000574779  | -0.6501051449 | -1.3125237825 |
| N  | 1.5016380467  | -1.2278732225 | -2.347624655  |
| N  | 1.7271719308  | -1.7851738999 | -3.3099293568 |

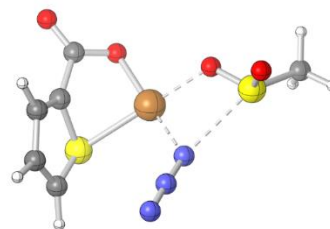

|   |               |               |              |
|---|---------------|---------------|--------------|
| S | 1.2179532191  | -1.2508510117 | 1.2906674222 |
| O | 0.9705611206  | -2.6730585675 | 1.4917294775 |
| O | -0.0015553447 | -0.4142353468 | 1.0471997245 |
| C | 1.7950538913  | -0.5562695712 | 2.8503104413 |
| H | 2.7089718064  | -1.0801807134 | 3.1049220444 |
| H | 1.9719941435  | 0.5009394285  | 2.6921502144 |
| H | 1.0127873953  | -0.7308474663 | 3.5828665727 |

## DABCO

E(RPW6B95D3) = -345.917772549

Charge = 0      Multiplicity = 1

|   |               |              |               |
|---|---------------|--------------|---------------|
| C | -1.2483988393 | 0.8851799918 | -0.0375017948 |
| C | -1.7729443768 | 2.3369918865 | 0.0379336382  |
| H | -1.5627935762 | 0.4001806773 | -0.9597323737 |
| H | -1.6168913339 | 0.2889287388 | 0.795076316   |
| H | -2.4375222353 | 2.5596413913 | -0.7947162955 |
| H | -2.3245012202 | 2.5092039231 | 0.9602537429  |
| C | 0.7167452385  | 1.5947708627 | -1.1683681456 |
| H | 1.8031108317  | 1.6164948795 | -1.1058030842 |
| H | 0.4452967866  | 1.0333032144 | -2.0603150962 |
| C | 0.1301241634  | 3.0241985622 | -1.2065088136 |
| H | 0.9183936384  | 3.7722382282 | -1.266487875  |
| H | -0.5234524227 | 3.158876609  | -2.0662705792 |
| C | 0.19204921    | 3.0471128713 | 1.1680797132  |
| H | 1.0409663051  | 3.7253314495 | 1.1057089596  |
| H | -0.3760902632 | 3.30501868   | 2.0598500962  |

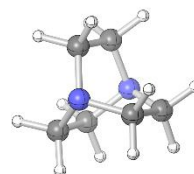

|   |               |              |               |
|---|---------------|--------------|---------------|
| C | 0.6550130356  | 1.5730376982 | 1.2063274682  |
| H | 1.7393934688  | 1.5018084317 | 1.2660179906  |
| H | 0.2387124682  | 1.0518133936 | 2.0662638985  |
| N | -0.6536075066 | 3.2734419033 | -0.0003810737 |
| N | 0.2113634279  | 0.8798450076 | 0.0002173084  |

**\*DABCO-H<sup>+</sup>**

E(RPW6B95D3) = -346.383740101

Charge = 1      Multiplicity = 1

|   |               |              |               |
|---|---------------|--------------|---------------|
| C | -0.1205497968 | 3.8568035179 | 0.7088539856  |
| C | -0.542667199  | 5.3072554563 | 0.9886870518  |
| H | -0.3979797112 | 3.5220576678 | -0.284699055  |
| H | -0.4970601482 | 3.1550229055 | 1.4438309259  |
| H | -1.2987272749 | 5.6140941689 | 0.2731842889  |
| H | -0.9608444598 | 5.3985708217 | 1.9864704908  |
| C | 1.9479461289  | 4.5760977474 | -0.3779367958 |
| H | 3.0198106244  | 4.6168768431 | -0.2190270609 |
| H | 1.7382287111  | 4.0108473094 | -1.2784404514 |
| C | 1.290154223   | 5.9643480719 | -0.3738991919 |
| H | 2.0463947847  | 6.7285925454 | -0.5217560736 |
| H | 0.562426719   | 6.045846866  | -1.1754497551 |
| C | 1.5231805339  | 5.9231792806 | 1.9896014501  |
| H | 2.4297907717  | 6.4984756224 | 1.8286939361  |
| H | 1.0754354512  | 6.2466266105 | 2.9237711104  |
| C | 1.8396948713  | 4.4217888097 | 2.0581807893  |
| H | 2.899593034   | 4.2145399169 | 2.1477665718  |

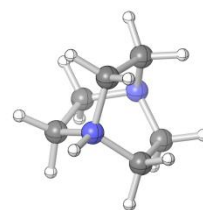

|   |              |              |              |
|---|--------------|--------------|--------------|
| H | 1.3062120574 | 3.9152578929 | 2.8544689474 |
| N | 0.6068935914 | 6.1965676261 | 0.8910888501 |
| N | 1.370880145  | 3.821902987  | 0.773608009  |
| H | 1.6812453029 | 2.8561380326 | 0.7267847166 |

**\*Br anion**

E(RPW6B95D3) = -2575.44819749

Charge = -1      Multiplicity = 1

|    |             |            |            |
|----|-------------|------------|------------|
| Br | -1.57958556 | 2.34217649 | 0.00000000 |
|----|-------------|------------|------------|

**4-Bromo-1-(methylsulfonyl)butane-2-sulfinic acid**

E(RPW6B95D3) = -3871.20157154

Charge = 0      Multiplicity = 1

|   |               |               |               |
|---|---------------|---------------|---------------|
| S | -2.7765567174 | -0.6094864324 | -0.1033405084 |
| O | -2.6698060909 | -2.0118072768 | -0.4190180606 |
| O | -2.7031669691 | 0.3383801661  | -1.1912280521 |
| C | -1.5111681599 | -0.166950412  | 1.0718055731  |
| H | -1.8804945602 | 0.6951802644  | 1.6206553168  |
| H | -1.4055100303 | -1.0059156798 | 1.754543094   |
| C | -0.1797655921 | 0.1639292268  | 0.4237542174  |
| H | 0.5224278342  | 0.3239251689  | 1.2429094493  |
| S | -0.2737735225 | 1.809494181   | -0.4070362397 |
| O | -1.067371286  | 2.6377038663  | 0.5069639666  |
| O | 1.2900132474  | 2.2105683204  | -0.2245163007 |
| H | 1.5476093966  | 2.2069301087  | 0.7118748123  |

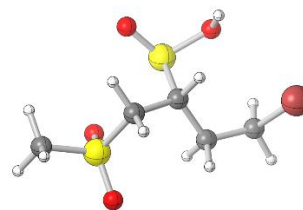

|    |               |               |               |
|----|---------------|---------------|---------------|
| C  | 0.3410092097  | -0.9121512417 | -0.5172740497 |
| H  | -0.2724495476 | -0.9367155292 | -1.4193403948 |
| H  | 0.2081711592  | -1.876850881  | -0.0320193289 |
| C  | 1.7701800619  | -0.7729432618 | -0.9749015913 |
| H  | 1.9706930168  | 0.1507507188  | -1.4992769329 |
| H  | 2.0519570978  | -1.6114863671 | -1.5973904477 |
| Br | 3.0392567668  | -0.7969866054 | 0.5212029675  |
| C  | -4.2709133103 | -0.3471889485 | 0.7844409492  |
| H  | -4.2677625555 | -0.9675905689 | 1.6750210452  |
| H  | -4.3581335181 | 0.7042229699  | 1.0351829737  |
| H  | -5.0765271081 | -0.648708468  | 0.120736985   |

***cis*-3-((Methylsulfonyl)methyl)-1,2-oxathiolane 2-oxide**

E(RPW6B95D3) = -1295.71285890

Charge = 1      Multiplicity = 1

|   |              |               |               |
|---|--------------|---------------|---------------|
| C | 0.7425663485 | 0.7846359492  | -0.0112895446 |
| S | 1.353728182  | -0.8874508889 | -0.376240264  |
| O | 1.304893297  | -1.4527618965 | 1.1048033954  |
| H | 1.184520322  | -2.418620742  | 1.0969097226  |
| O | 2.8266377647 | -0.4250415282 | -0.5871697401 |
| C | 3.1662002524 | 0.901210942   | -0.0250411206 |
| H | 3.4217751987 | 1.5110339054  | -0.88292571   |
| H | 4.027682124  | 0.7530696082  | 0.6122566635  |
| C | 1.9426192577 | 1.3831259722  | 0.7096521603  |
| H | 1.8781369384 | 2.4658624481  | 0.6780847162  |
| H | 1.9505714479 | 1.0612824928  | 1.7465074974  |

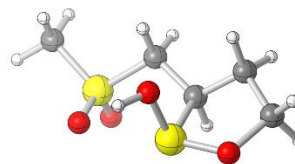

|   |               |               |               |
|---|---------------|---------------|---------------|
| H | 0.6200778772  | 1.2254384039  | -1.000465645  |
| C | -0.5385623811 | 0.8150788817  | 0.7865788042  |
| H | -0.4092896053 | 0.3463548901  | 1.7586062761  |
| H | -0.8549481464 | 1.8457722591  | 0.9232833567  |
| S | -1.8288276196 | -0.0562603934 | -0.0802644009 |
| O | -2.2457305123 | 0.7241627844  | -1.2118446624 |
| O | -1.2907505154 | -1.3798583103 | -0.3265166928 |
| C | -3.1404869436 | -0.1725886958 | 1.0740856187  |
| H | -2.8037901179 | -0.7195461976 | 1.9477848955  |
| H | -3.9364735393 | -0.7143423018 | 0.5697692188  |
| H | -3.4719265252 | 0.8280236689  | 1.3314882983  |

***trans*-3-((Methylsulfonyl)methyl)-1,2-oxathiolane 2-oxide**

E(RPW6B95D3) = -1295.71132693

Charge = 1      Multiplicity = 1

|   |              |               |               |
|---|--------------|---------------|---------------|
| C | 0.6258237579 | -0.7784335611 | -0.339040461  |
| S | 1.2877795764 | 0.8051776636  | 0.3215745429  |
| O | 1.3160014231 | 1.587850145   | -1.0556927925 |
| H | 1.3236899077 | 2.5488210196  | -0.8977256418 |
| O | 2.7483824549 | 0.2801677252  | 0.5290680778  |
| C | 3.0411548941 | -0.926239392  | -0.2598647269 |
| H | 3.271424178  | -0.6186538406 | -1.2746588735 |
| H | 3.9066616915 | -1.3739267958 | 0.209443235   |
| C | 1.7845701143 | -1.7442785948 | -0.147790796  |
| H | 1.7271600271 | -2.2130209299 | 0.8302299385  |
| H | 1.7457179708 | -2.5118444071 | -0.9146248688 |

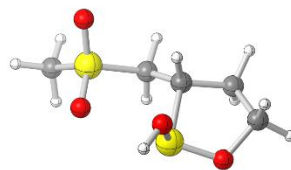

|   |               |               |               |
|---|---------------|---------------|---------------|
| H | 0.4560482595  | -0.5603953671 | -1.3919399459 |
| C | -0.6516721844 | -1.1900093157 | 0.3569827929  |
| H | -0.9636623867 | -2.1660800256 | -0.0038279276 |
| H | -0.5352924255 | -1.2315197231 | 1.4371736548  |
| S | -1.9330630191 | -0.0134934072 | -0.0350275898 |
| O | -2.408429815  | -0.2675080935 | -1.366287721  |
| O | -1.3472572675 | 1.2835896121  | 0.2429275741  |
| C | -3.2095278475 | -0.3303497347 | 1.1215741776  |
| H | -2.8331827767 | -0.16653538   | 2.1253791465  |
| H | -4.0054061671 | 0.3736950933  | 0.8932759291  |
| H | -3.5597236655 | -1.3489022707 | 0.9884786153  |

## TScis

E(RPW6B95D3) = -4217.12644010

Charge = 0      Multiplicity = 1

|   |               |              |               |
|---|---------------|--------------|---------------|
| O | -0.3045227022 | 0.0794667308 | 1.6522219157  |
| C | -0.1994138983 | 2.1046319369 | 0.243316323   |
| C | -1.6384392611 | 2.0248798606 | 0.7238839116  |
| H | 0.4391916723  | 2.5026072942 | 1.0276228198  |
| H | -0.1606416007 | 2.7901073173 | -0.5964883602 |
| H | -2.3116748633 | 1.8627437589 | -0.1165674233 |
| S | -1.768473558  | 0.4785223582 | 1.7473684043  |
| C | -2.0382582125 | 3.25445784   | 1.5141433294  |
| H | -1.7288732998 | 3.1848343208 | 2.555840131   |
| H | -1.6243235534 | 4.1644185253 | 1.0869011854  |
| S | -3.8048153696 | 3.4420091813 | 1.4886698329  |

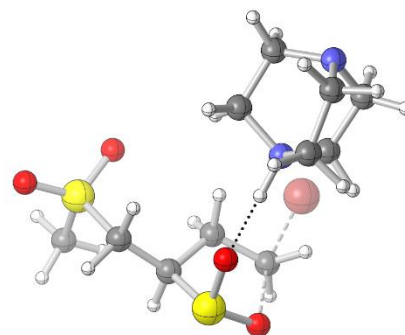



O -4.3899633243 2.1646255597 1.8280081238  
O -4.1878517479 4.031315378 0.2282974427  
C -4.14396942 4.5868926203 2.7777019869  
H -3.6083763784 5.5101415787 2.5817170091  
H -3.8465823938 4.1530175105 3.7262325379  
O -2.5936813289 -0.421157164 0.8734868535  
H -4.0978729018 -0.1396807487 0.2008824818  
H -5.215727775 4.7635443741 2.7601475556  
H 1.2979289742 0.4430161491 0.086433853  
H -0.3399668753 0.0527106722 -0.6362344353  
Br 1.1732686888 1.2271357097 -2.4539117155  
C 0.3051305015 0.7592614825 -0.1548917295  
C -7.311502351 -0.4388715614 -0.7266352742  
C -6.1972709667 -0.0837818059 0.2693575019  
H -8.1187263067 0.2833648458 -0.6502349388  
H -7.7179522574 -1.4241809638 -0.5169992773  
H -6.2606200562 0.937340681 0.6238794205  
H -6.1646667024 -0.7527978319 1.1221421368  
C -6.076645413 0.8050957004 -2.3290887441  
H -5.8278483364 0.8815445263 -3.3831405871  
H -6.7362301346 1.6301109593 -2.0756326936  
C -4.7960251107 0.8565413639 -1.4824995978  
H -3.9027272797 0.6458272505 -2.0613345577  
H -4.6715647104 1.8015914596 -0.9669208264  
C -4.8301024362 -1.5452869937 -1.1099422114  
H -3.814204836 -1.6785278493 -1.463472976  
H -5.0364117765 -2.2842136075 -0.3431174335

|   |               |               |               |
|---|---------------|---------------|---------------|
| C | -5.8672973929 | -1.5577210761 | -2.242010665  |
| H | -5.3818169924 | -1.4665812378 | -3.2093393398 |
| H | -6.4217992483 | -2.4911517206 | -2.2274513211 |
| N | -6.792808093  | -0.4418666972 | -2.0892116941 |
| N | -4.906074912  | -0.211841738  | -0.4544910951 |

## TStrans

E(RPW6B95D3) = -4217.12099351

|   | Charge = 0    | Multiplicity = 1 |               |
|---|---------------|------------------|---------------|
| O | -0.3045227022 | 0.0794667308     | 1.6522219157  |
| C | -0.1994138983 | 2.1046319369     | 0.243316323   |
| C | -1.6384392611 | 2.0248798606     | 0.7238839116  |
| H | 0.4391916723  | 2.5026072942     | 1.0276228198  |
| H | -0.1606416007 | 2.7901073173     | -0.5964883602 |
| H | -2.3116748633 | 1.8627437589     | -0.1165674233 |
| S | -1.768473558  | 0.4785223582     | 1.7473684043  |
| C | -2.0382582125 | 3.25445784       | 1.5141433294  |
| H | -1.7288732998 | 3.1848343208     | 2.555840131   |
| H | -1.6243235534 | 4.1644185253     | 1.0869011854  |
| S | -3.8048153696 | 3.4420091813     | 1.4886698329  |
| O | -4.3899633243 | 2.1646255597     | 1.8280081238  |
| O | -4.1878517479 | 4.031315378      | 0.2282974427  |
| C | -4.14396942   | 4.5868926203     | 2.7777019869  |
| H | -3.6083763784 | 5.5101415787     | 2.5817170091  |
| H | -3.8465823938 | 4.1530175105     | 3.7262325379  |
| O | -2.5936813289 | -0.421157164     | 0.8734868535  |

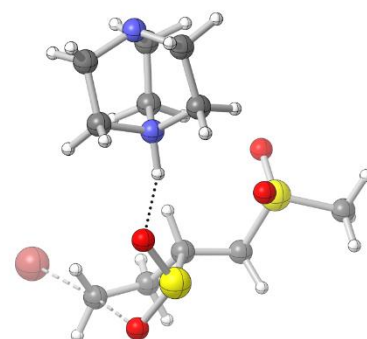

|    |               |               |               |
|----|---------------|---------------|---------------|
| H  | -4.0978729018 | -0.1396807487 | 0.2008824818  |
| H  | -5.215727775  | 4.7635443741  | 2.7601475556  |
| H  | 1.2979289742  | 0.4430161491  | 0.086433853   |
| H  | -0.3399668753 | 0.0527106722  | -0.6362344353 |
| Br | 1.1732686888  | 1.2271357097  | -2.4539117155 |
| C  | 0.3051305015  | 0.7592614825  | -0.1548917295 |
| C  | -7.311502351  | -0.4388715614 | -0.7266352742 |
| C  | -6.1972709667 | -0.0837818059 | 0.2693575019  |
| H  | -8.1187263067 | 0.2833648458  | -0.6502349388 |
| H  | -7.7179522574 | -1.4241809638 | -0.5169992773 |
| H  | -6.2606200562 | 0.937340681   | 0.6238794205  |
| H  | -6.1646667024 | -0.7527978319 | 1.1221421368  |
| C  | -6.076645413  | 0.8050957004  | -2.3290887441 |
| H  | -5.8278483364 | 0.8815445263  | -3.3831405871 |
| H  | -6.7362301346 | 1.6301109593  | -2.0756326936 |
| C  | -4.7960251107 | 0.8565413639  | -1.4824995978 |
| H  | -3.9027272797 | 0.6458272505  | -2.0613345577 |
| H  | -4.6715647104 | 1.8015914596  | -0.9669208264 |
| C  | -4.8301024362 | -1.5452869937 | -1.1099422114 |
| H  | -3.814204836  | -1.6785278493 | -1.463472976  |
| H  | -5.0364117765 | -2.2842136075 | -0.3431174335 |
| C  | -5.8672973929 | -1.5577210761 | -2.242010665  |
| H  | -5.3818169924 | -1.4665812378 | -3.2093393398 |
| H  | -6.4217992483 | -2.4911517206 | -2.2274513211 |
| N  | -6.792808093  | -0.4418666972 | -2.0892116941 |
| N  | -4.906074912  | -0.211841738  | -0.4544910951 |

**Anilinium**

E(RPW6B95D3) = -288.549609718

Charge = 1      Multiplicity = 1

|   |               |               |               |
|---|---------------|---------------|---------------|
| C | -0.7004496776 | 1.1921768662  | -0.0559599866 |
| C | 0.6672518271  | 1.2743996801  | 0.077916682   |
| C | 1.334361294   | 2.4779867638  | 0.1586576609  |
| C | 0.5943163295  | 3.6446213364  | 0.1041781496  |
| C | -0.7835593128 | 3.5896832188  | -0.0283551592 |
| C | -1.4289977229 | 2.3682959245  | -0.1089245829 |
| H | -1.1881799918 | 0.2310669072  | -0.1158280501 |
| H | 2.4080760309  | 2.5048898323  | 0.2617383089  |
| H | 1.0972195912  | 4.5963381454  | 0.164506696   |
| H | -1.3553573136 | 4.5030843992  | -0.0701287239 |
| H | -2.5010582444 | 2.3250985511  | -0.2144072305 |
| N | 1.445630853   | 0.0351855082  | 0.155029104   |
| H | 0.8854705201  | -0.7697577189 | -0.1233047472 |
| H | 2.2622446612  | 0.0668448606  | -0.4556229892 |
| H | 1.7821601561  | -0.139236275  | 1.1030346802  |

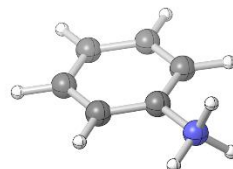**PhNH Anion**

E(RPW6B95D3) = -287.580271143

Charge = -1      Multiplicity = 1

|   |               |              |               |
|---|---------------|--------------|---------------|
| C | -0.6769184853 | 1.1903995803 | -0.1267049428 |
| C | 0.7483156046  | 1.1731289609 | 0.0043767464  |

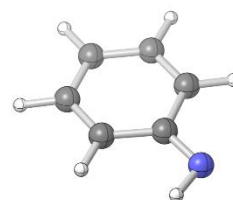

|   |               |               |               |
|---|---------------|---------------|---------------|
| C | 1.3376427404  | 2.4701851154  | 0.1322712661  |
| C | 0.5903454718  | 3.6259035689  | 0.1300064623  |
| C | -0.7978822717 | 3.6039028799  | 0.0018237776  |
| C | -1.4078222013 | 2.358825263   | -0.1271517064 |
| H | -1.1882783774 | 0.2407954735  | -0.2290425867 |
| H | 2.4134699395  | 2.5228847258  | 0.2350531514  |
| H | 1.1002718697  | 4.5753772247  | 0.232136925   |
| H | -1.3760157453 | 4.5146329083  | 0.001377137   |
| H | -2.4840076362 | 2.3001330824  | -0.2300584171 |
| N | 1.5056422349  | 0.080081245   | 0.0143512859  |
| H | 0.8994513864  | -0.7288953181 | -0.0867939285 |

### MeSO<sub>2</sub>NHPh radical anion

E(UPW6B95D3) = -876.724883577

Charge = -1      Multiplicity = 2

|   |               |               |               |
|---|---------------|---------------|---------------|
| S | 1.0072846419  | 2.122504285   | 0.3059041389  |
| O | 2.194507939   | 1.6803153853  | -0.3764675657 |
| O | 1.146883875   | 3.0648581468  | 1.3781889111  |
| C | -0.1030074104 | 2.8167372306  | -0.871492465  |
| H | -0.22664061   | 2.1199777613  | -1.6931575071 |
| H | -1.0515553754 | 3.0068915149  | -0.3797607544 |
| H | 0.3348078804  | 3.74715344    | -1.2192685947 |
| N | 0.2956951181  | 0.7610430275  | 0.8585842318  |
| H | 0.5433399887  | -0.0186843952 | 0.2653813565  |
| C | -1.0783863444 | 0.7415975831  | 1.2652547022  |
| C | -1.51708997   | 1.5882350547  | 2.2591742092  |

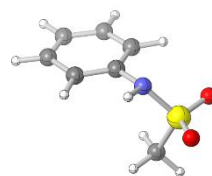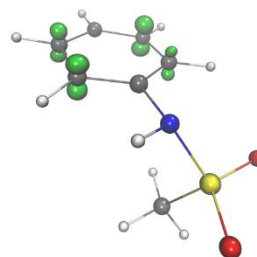

|   |               |               |               |
|---|---------------|---------------|---------------|
| C | -1.9118928462 | -0.167897569  | 0.614329288   |
| C | -2.914271718  | 1.5495641203  | 2.6290157051  |
| H | -0.8182910611 | 2.2373195004  | 2.7598056569  |
| C | -3.2879006647 | -0.2554857259 | 1.0463322208  |
| H | -1.5283868735 | -0.7666877943 | -0.1983307319 |
| C | -3.7440335084 | 0.6092763281  | 2.0221266735  |
| H | -3.2917010375 | 2.206442427   | 3.3972649383  |
| H | -3.9569129107 | -0.96850192   | 0.5880852904  |
| H | -4.782744313  | 0.5535544395  | 2.3258244462  |

### MeSO<sub>2</sub>NH<sub>2</sub>Ph radical

E(UPW6B95D3) = -877.260419517

Charge = 0      Multiplicity = 2

|   |               |               |               |
|---|---------------|---------------|---------------|
| S | 1.2571284745  | 1.9083544959  | 0.1291602938  |
| O | 1.1830236344  | 2.7572816023  | 1.3091367944  |
| O | 0.2351722502  | 2.0408024867  | -0.8984266819 |
| C | 2.8363492859  | 2.2470327914  | -0.6599561343 |
| H | 3.6167476963  | 2.0938561916  | 0.0761108337  |
| H | 2.9410697288  | 1.569513617   | -1.4992915149 |
| H | 2.8019278774  | 3.2819434865  | -0.9900799503 |
| N | 0.0705433929  | -0.4633301788 | 1.4576752235  |
| H | 0.1906104483  | -1.2518609268 | 0.8462707     |
| C | -1.217763773  | 0.0052930013  | 1.609676912   |
| C | -1.5570945437 | 0.8030603073  | 2.7022140823  |
| C | -2.1851513715 | -0.2518009637 | 0.6383698401  |

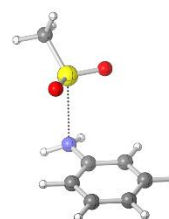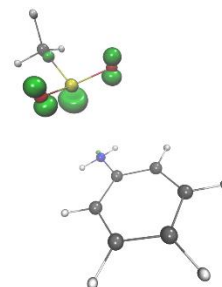

|   |               |               |               |
|---|---------------|---------------|---------------|
| C | -2.8328175494 | 1.3199333371  | 2.8184253059  |
| H | -0.8115591889 | 1.0126898606  | 3.4551150219  |
| C | -3.4576233199 | 0.2696597106  | 0.7659768136  |
| H | -1.9270013524 | -0.8609996737 | -0.2155584338 |
| C | -3.7940486943 | 1.0596409606  | 1.8543148945  |
| H | -3.0770536385 | 1.934068626   | 3.6721296394  |
| H | -4.1931143897 | 0.0579849403  | 0.004511078   |
| H | -4.7886040356 | 1.4659927388  | 1.9491135645  |
| H | 0.6278280684  | -0.516810411  | 2.2923187176  |

## X-Ray Crystallographic Data

### 4-((3,4-Dimethoxyphenethyl)sulfonyl)morpholine (1c)

CCDC 2042738

---

|                                                                                            |                                                   |                                                   |
|--------------------------------------------------------------------------------------------|---------------------------------------------------|---------------------------------------------------|
| Bond precision:                                                                            | C-C = 0.0019 Å                                    | Wavelength = 1.54184                              |
| Cell:                                                                                      | a = 26.9877(4)    b = 5.7256(1)    c = 9.8987(2)  |                                                   |
|                                                                                            | $\alpha = 90$ $\beta = 90.078(2)$ $\gamma = 90$   |                                                   |
| Temperature:                                                                               | 100 K                                             |                                                   |
|                                                                                            | Calculated                                        | Reported                                          |
| Volume                                                                                     | 1529.55(5)                                        | 1529.55(5)                                        |
| Space group                                                                                | P 21/c                                            | P 1 21/c 1                                        |
| Hall group                                                                                 | -P 2ybc                                           | -P 2ybc                                           |
| Moiety formula                                                                             | C <sub>14</sub> H <sub>21</sub> NO <sub>5</sub> S | C <sub>14</sub> H <sub>21</sub> NO <sub>5</sub> S |
| Sum formula                                                                                | C <sub>14</sub> H <sub>21</sub> NO <sub>5</sub> S | C <sub>14</sub> H <sub>21</sub> NO <sub>5</sub> S |
| M <sub>r</sub>                                                                             | 315.38                                            | 315.38                                            |
| D <sub>x</sub> , g cm <sup>-3</sup>                                                        | 1.370                                             | 1.370                                             |
| Z                                                                                          | 4                                                 | 4                                                 |
| Mu (mm <sup>-1</sup> )                                                                     | 2.075                                             | 2.075                                             |
| F000                                                                                       | 672.0                                             | 672.0                                             |
| F000'                                                                                      | 675.38                                            |                                                   |
| h,k,l <sub>max</sub>                                                                       | 34,7,12                                           | 33,7,12                                           |
| N <sub>ref</sub>                                                                           | 3203                                              | 2942                                              |
| T <sub>min</sub> , T <sub>max</sub>                                                        | 0.748, 0.849                                      | 0.563, 1.000                                      |
| T <sub>min</sub> '                                                                         | 0.624                                             |                                                   |
| Correction method = # Reported T Limits: T <sub>min</sub> = 0.563 T <sub>max</sub> = 1.000 |                                                   |                                                   |
| AbsCorr = GAUSSIAN                                                                         |                                                   |                                                   |
| Data completeness = 0.919                                                                  | Theta(max) = 76.280                               |                                                   |
| R(reflections) = 0.0326(2713)                                                              | wR2(reflections) = 0.0863(2942)                   |                                                   |
| S = 1.051                                                                                  | N <sub>par</sub> = 192                            |                                                   |

---



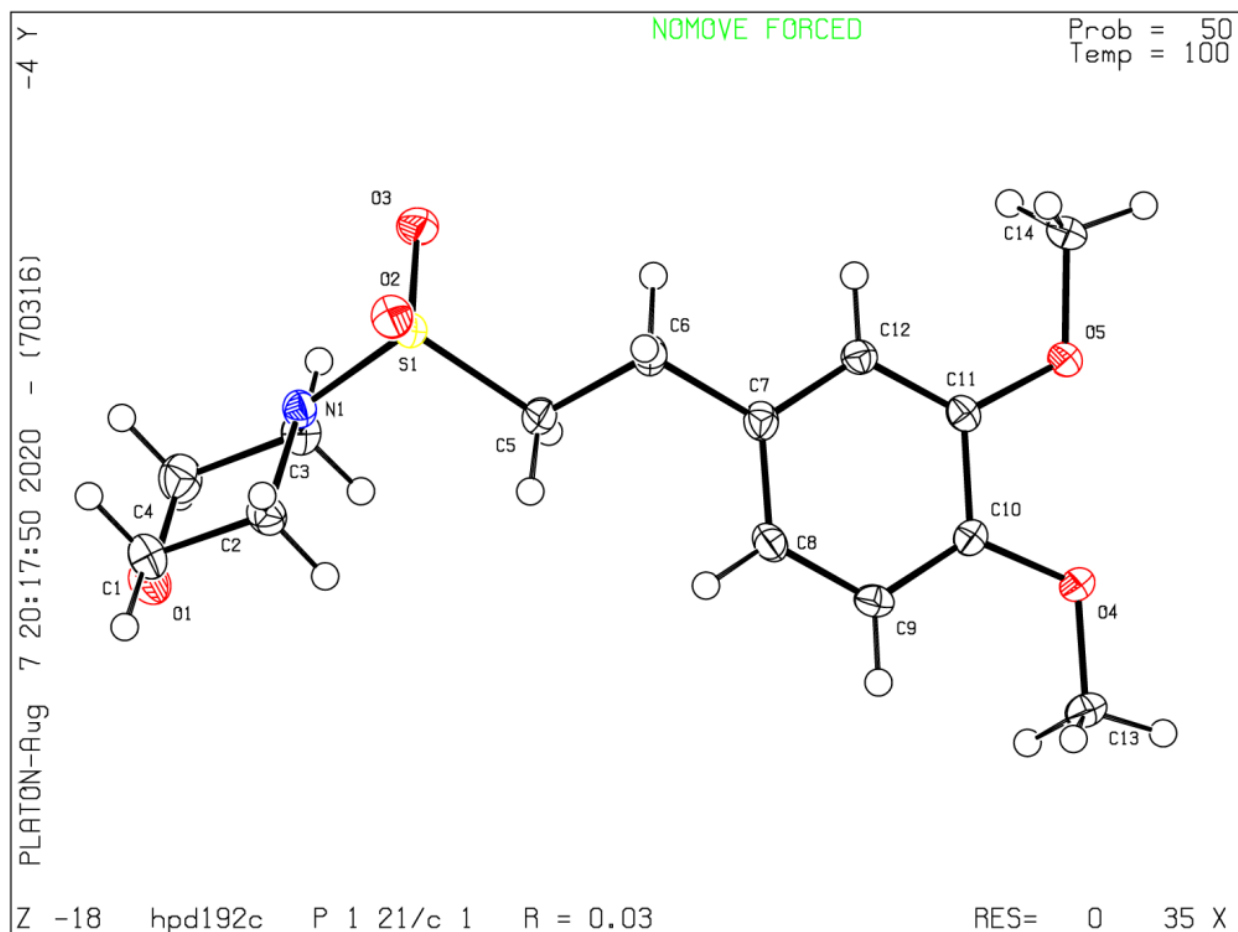

# 4-((2,3-Dihydro-1*H*-inden-2-yl)sulfonyl)morpholine (1i)

CCDC 2042739

---

|                                                                                            |                                                    |                                                   |
|--------------------------------------------------------------------------------------------|----------------------------------------------------|---------------------------------------------------|
| Bond precision:                                                                            | C-C = 0.0021 Å                                     | Wavelength = 1.54184                              |
| Cell:                                                                                      | a = 23.1972(2)    b = 6.10055(7)    c = 9.24200(9) |                                                   |
|                                                                                            | α = 90                    β = 90.2932(9)    γ = 90 |                                                   |
| Temperature:                                                                               | 100 K                                              |                                                   |
|                                                                                            | Calculated                                         | Reported                                          |
| Volume                                                                                     | 1307.87(2)                                         | 1307.87(2)                                        |
| Space group                                                                                | P 21/c                                             | P 1 21/c 1                                        |
| Hall group                                                                                 | -P 2ybc                                            | -P 2ybc                                           |
| Moiety formula                                                                             | C <sub>13</sub> H <sub>17</sub> NO <sub>3</sub> S  | C <sub>13</sub> H <sub>17</sub> NO <sub>3</sub> S |
| Sum formula                                                                                | C <sub>13</sub> H <sub>17</sub> NO <sub>3</sub> S  | C <sub>13</sub> H <sub>17</sub> NO <sub>3</sub> S |
| M <sub>r</sub>                                                                             | 267.34                                             | 267.33                                            |
| D <sub>x</sub> , g cm <sup>-3</sup>                                                        | 1.358                                              | 1.358                                             |
| Z                                                                                          | 4                                                  | 4                                                 |
| Mu (mm <sup>-1</sup> )                                                                     | 2.213                                              | 2.213                                             |
| F <sub>000</sub>                                                                           | 568.0                                              | 568.0                                             |
| F <sub>000</sub> '                                                                         | 570.92                                             |                                                   |
| h,k,l <sub>max</sub>                                                                       | 29,7,11                                            | 29,7,11                                           |
| N <sub>ref</sub>                                                                           | 2738                                               | 2668                                              |
| T <sub>min</sub> , T <sub>max</sub>                                                        | 0.658, 0.885                                       | 0.515, 1.000                                      |
| T <sub>min</sub> '                                                                         | 0.576                                              |                                                   |
| Correction method = # Reported T Limits: T <sub>min</sub> = 0.515 T <sub>max</sub> = 1.000 |                                                    |                                                   |
| AbsCorr = GAUSSIAN                                                                         |                                                    |                                                   |
| Data completeness = 0.974                                                                  | Theta(max) = 76.443                                |                                                   |
| R(reflections) = 0.0343(2450)                                                              | wR2(reflections) = 0.0974(2668)                    |                                                   |
| S = 1.090                                                                                  | N <sub>par</sub> = 163                             |                                                   |

---

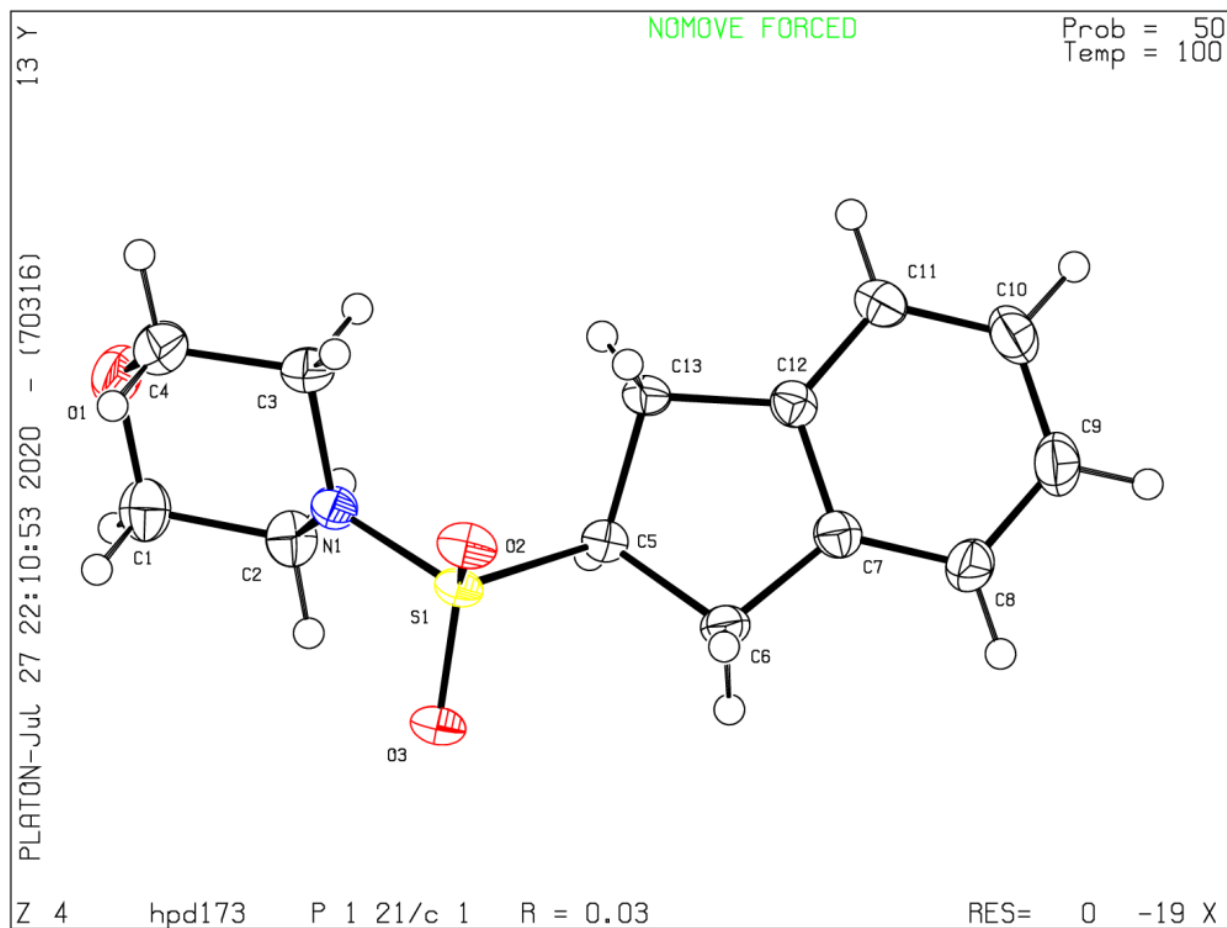

## 4-((4,4-Difluorocyclohexyl)sulfonyl)morpholine (1j)

CCDC 2042740

---

|                                                                                            |                                                                  |                                                                  |
|--------------------------------------------------------------------------------------------|------------------------------------------------------------------|------------------------------------------------------------------|
| Bond precision:                                                                            | C–C = 0.0020 Å                                                   | Wavelength = 1.54184                                             |
| Cell:                                                                                      | a = 11.83783(11)    b = 10.04452(10)    c = 10.01996(9)          |                                                                  |
|                                                                                            | $\alpha = 90$ $\beta = 96.4304(8)$ $\gamma = 90$                 |                                                                  |
| Temperature:                                                                               | 100 K                                                            |                                                                  |
|                                                                                            | Calculated                                                       | Reported                                                         |
| Volume                                                                                     | 1183.931(19)                                                     | 1183.93(2)                                                       |
| Space group                                                                                | P 21/c                                                           | P 1 21/c 1                                                       |
| Hall group                                                                                 | -P 2ybc                                                          | -P 2ybc                                                          |
| Moiety formula                                                                             | C <sub>10</sub> H <sub>17</sub> F <sub>2</sub> NO <sub>3</sub> S | C <sub>10</sub> H <sub>17</sub> F <sub>2</sub> NO <sub>3</sub> S |
| Sum formula                                                                                | C <sub>10</sub> H <sub>17</sub> F <sub>2</sub> NO <sub>3</sub> S | C <sub>10</sub> H <sub>17</sub> F <sub>2</sub> NO <sub>3</sub> S |
| M <sub>r</sub>                                                                             | 269.31                                                           | 269.30                                                           |
| D <sub>x</sub> , g cm <sup>-3</sup>                                                        | 1.511                                                            | 1.511                                                            |
| Z                                                                                          | 4                                                                | 4                                                                |
| Mu (mm <sup>-1</sup> )                                                                     | 2.690                                                            | 2.690                                                            |
| F000                                                                                       | 568.0                                                            | 568.0                                                            |
| F000'                                                                                      | 571.29                                                           |                                                                  |
| h,k,l <sub>max</sub>                                                                       | 14,12,12                                                         | 14,12,12                                                         |
| N <sub>ref</sub>                                                                           | 2486                                                             | 2397                                                             |
| T <sub>min</sub> , T <sub>max</sub>                                                        | 0.597, 0.701                                                     | 0.534, 1.000                                                     |
| T <sub>min</sub> '                                                                         | 0.497                                                            |                                                                  |
| Correction method = # Reported T Limits: T <sub>min</sub> = 0.534 T <sub>max</sub> = 1.000 |                                                                  |                                                                  |
| AbsCorr = GAUSSIAN                                                                         |                                                                  |                                                                  |
| Data completeness = 0.964                                                                  | Theta(max) = 76.457                                              |                                                                  |
| R(reflections) = 0.0298(2287)                                                              | wR2(reflections) = 0.0759(2397)                                  |                                                                  |
| S = 1.075                                                                                  | N <sub>par</sub> = 154                                           |                                                                  |

---

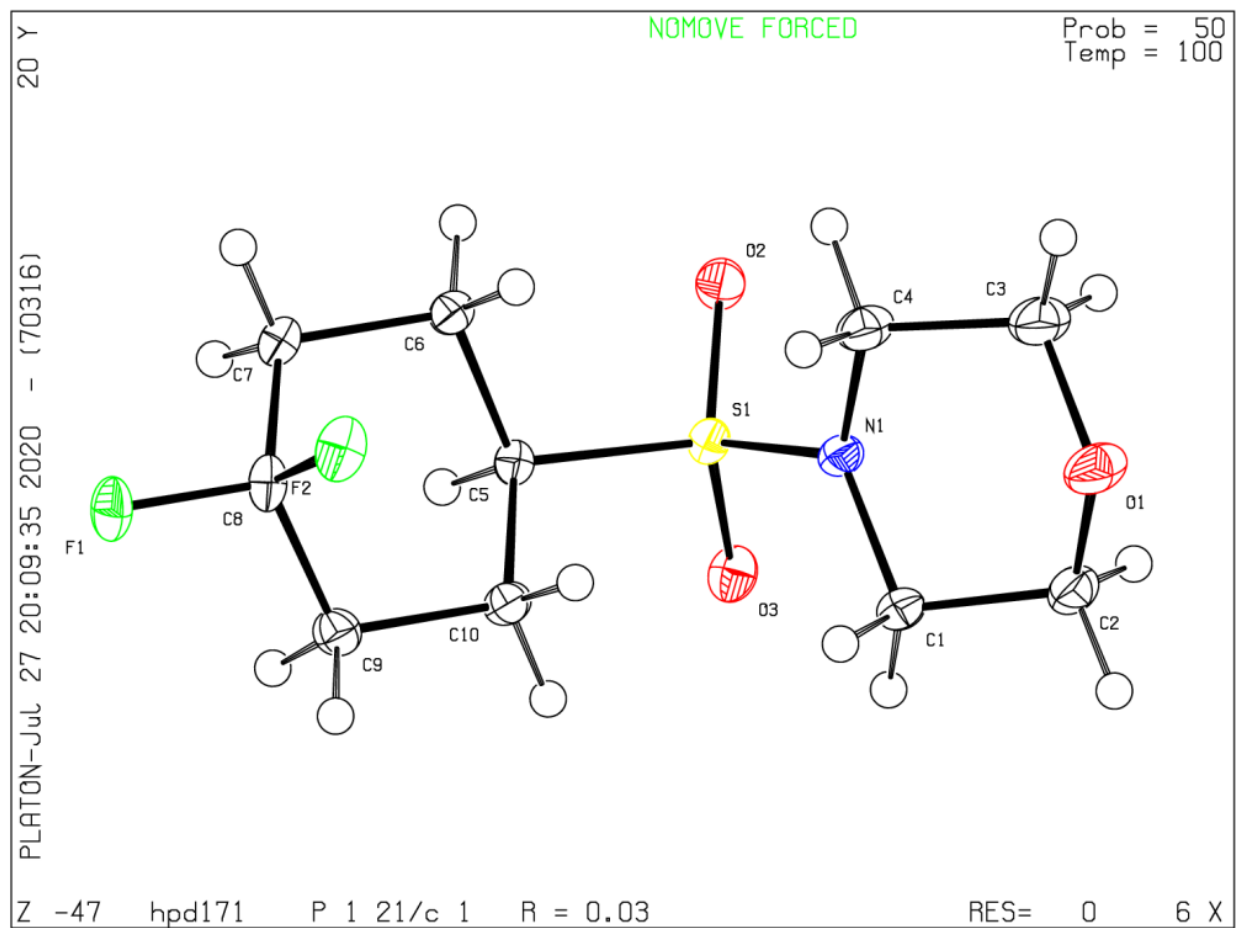

# 4-((Tetrahydro-2H-pyran-4-yl)sulfonyl)morpholine (1l)

CCDC 2042741

---

|                                                                                            |                                                  |                                                  |
|--------------------------------------------------------------------------------------------|--------------------------------------------------|--------------------------------------------------|
| Bond precision:                                                                            | C-C = 0.0023 Å                                   | Wavelength = 1.54184                             |
| Cell:                                                                                      | a = 18.4344(2)    b = 6.1010(1)    c = 9.7772(1) |                                                  |
|                                                                                            | $\alpha = 90$ $\beta = 91.605(1)$ $\gamma = 90$  |                                                  |
| Temperature:                                                                               | 100 K                                            |                                                  |
|                                                                                            | Calculated                                       | Reported                                         |
| Volume                                                                                     | 1099.19(2)                                       | 1099.19(2)                                       |
| Space group                                                                                | P 21/c                                           | P 1 21/c 1                                       |
| Hall group                                                                                 | -P 2ybc                                          | -P 2ybc                                          |
| Moiety formula                                                                             | C <sub>9</sub> H <sub>17</sub> NO <sub>4</sub> S | C <sub>9</sub> H <sub>17</sub> NO <sub>4</sub> S |
| Sum formula                                                                                | C <sub>9</sub> H <sub>17</sub> NO <sub>4</sub> S | C <sub>9</sub> H <sub>17</sub> NO <sub>4</sub> S |
| M <sub>r</sub>                                                                             | 235.30                                           | 235.29                                           |
| D <sub>x</sub> , g cm <sup>-3</sup>                                                        | 1.422                                            | 1.422                                            |
| Z                                                                                          | 4                                                | 4                                                |
| Mu (mm <sup>-1</sup> )                                                                     | 2.613                                            | 2.613                                            |
| F000                                                                                       | 504.0                                            | 504.0                                            |
| F000'                                                                                      | 506.84                                           |                                                  |
| h,k,l <sub>max</sub>                                                                       | 23,7,12                                          | 22,7,12                                          |
| N <sub>ref</sub>                                                                           | 2315                                             | 2219                                             |
| T <sub>min</sub> , T <sub>max</sub>                                                        | 0.532, 0.760                                     | 0.397, 1.000                                     |
| T <sub>min</sub> '                                                                         | 0.434                                            |                                                  |
| Correction method = # Reported T Limits: T <sub>min</sub> = 0.397 T <sub>max</sub> = 1.000 |                                                  |                                                  |
| AbsCorr = GAUSSIAN                                                                         |                                                  |                                                  |
| Data completeness = 0.959                                                                  | Theta(max) = 76.521                              |                                                  |
| R(reflections) = 0.0369(2062)                                                              | wR2(reflections) = 0.1034(2219)                  |                                                  |
| S = 1.094                                                                                  | N <sub>par</sub> = 163                           |                                                  |

---

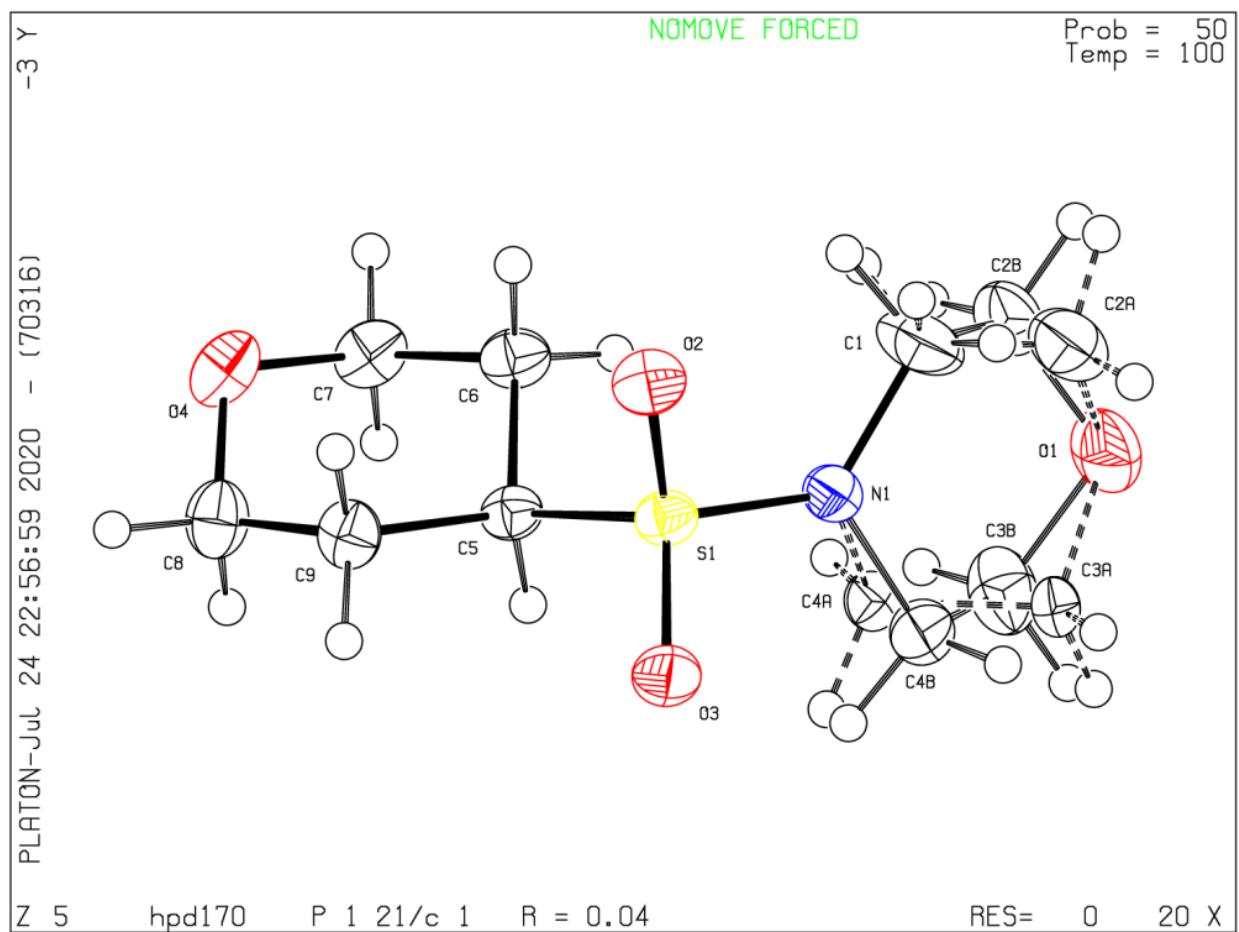

**(1*S*,2*S*,4*aR*,4*bR*,7*S*,9*aS*,10*S*,10*aR*)-1-Methyl-8-methylene-10-  
(morpholinosulfonyl)-13-oxo-1,2,5,6,8,9,10,10*a*-octahydro-4*a*,1-  
(epoxymethano)-7,9*a*-methanobenzo[*a*]azulene-2,7(4*bH*)-diyl diacetate**

**(10c)**

CCDC 2042742

---

|                                                                                            |                                                               |                                                   |
|--------------------------------------------------------------------------------------------|---------------------------------------------------------------|---------------------------------------------------|
| Bond precision:                                                                            | C–C = 0.0042 Å                                                | Wavelength = 1.54184                              |
| Cell:                                                                                      | a = 22.5244(2)    b = 10.26708(10)    c = 12.02634(11)        |                                                   |
|                                                                                            | $\alpha = 90$ $\beta = 96.6693(9)$ $\gamma = 90$              |                                                   |
| Temperature:                                                                               | 100 K                                                         |                                                   |
|                                                                                            | Calculated                                                    | Reported                                          |
| Volume                                                                                     | 2762.39(4)                                                    | 2762.38(5)                                        |
| Space group                                                                                | C 2                                                           | C 1 2 1                                           |
| Hall group                                                                                 | C 2y                                                          | C 2y                                              |
| Moiety formula                                                                             | C <sub>26</sub> H <sub>33</sub> NO <sub>9</sub> S [+ solvent] | C <sub>26</sub> H <sub>33</sub> NO <sub>9</sub> S |
| Sum formula                                                                                | C <sub>26</sub> H <sub>33</sub> NO <sub>9</sub> S [+ solvent] | C <sub>26</sub> H <sub>33</sub> NO <sub>9</sub> S |
| M <sub>r</sub>                                                                             | 535.59                                                        | 535.59                                            |
| D <sub>x</sub> , g cm <sup>−3</sup>                                                        | 1.288                                                         | 1.288                                             |
| Z                                                                                          | 4                                                             | 4                                                 |
| Mu (mm <sup>−1</sup> )                                                                     | 1.482                                                         | 1.482                                             |
| F <sub>000</sub>                                                                           | 1136.0                                                        | 1136.0                                            |
| F <sub>000</sub> '                                                                         | 1140.99                                                       |                                                   |
| h,k,l <sub>max</sub>                                                                       | 28,12,15                                                      | 27,12,15                                          |
| N <sub>ref</sub>                                                                           | 5797[3066]                                                    | 4895                                              |
| T <sub>min</sub> , T <sub>max</sub>                                                        | 0.771, 0.927                                                  | 0.506, 1.000                                      |
| T <sub>min</sub> '                                                                         | 0.682                                                         |                                                   |
| Correction method = # Reported T Limits: T <sub>min</sub> = 0.506 T <sub>max</sub> = 1.000 |                                                               |                                                   |
| AbsCorr = GAUSSIAN                                                                         |                                                               |                                                   |
| Data completeness = 1.60/0.84                                                              | Theta(max) = 76.582                                           |                                                   |
| R(reflections) = 0.0355(4809)                                                              | wR2(reflections) = 0.0944(4895)                               |                                                   |
| S = 1.012                                                                                  | N <sub>par</sub> = 339                                        |                                                   |

---



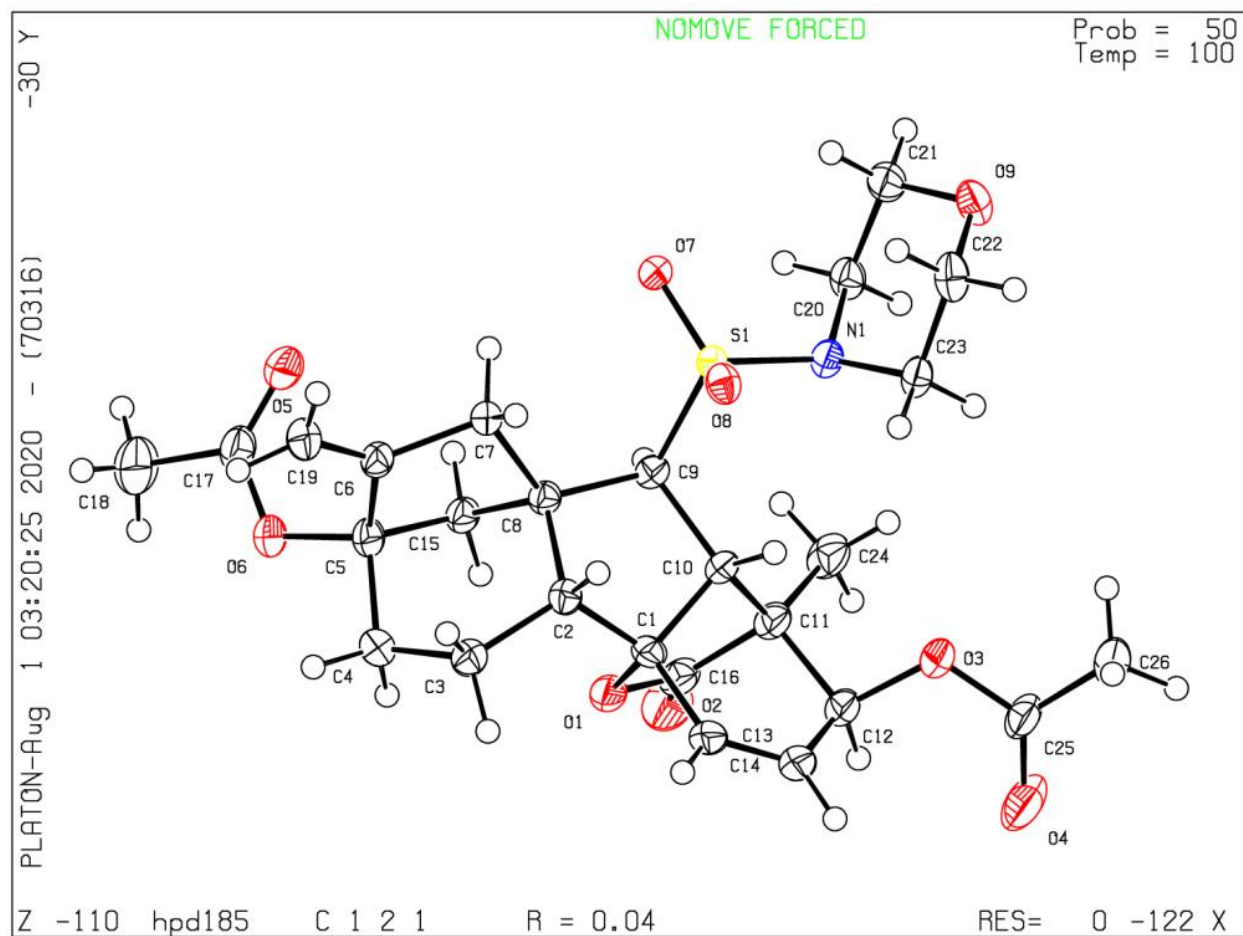

***N*-(*tert*-Butyl)adamantane-1-sulfonamide (3e)**

CCDC 2042743

---

|                                                                                            |                                                   |                                                   |
|--------------------------------------------------------------------------------------------|---------------------------------------------------|---------------------------------------------------|
| Bond precision:                                                                            | C–C = 0.0018 Å                                    | Wavelength = 1.54184                              |
| Cell:                                                                                      | a = 6.4731(1)    b = 19.8101(2)    c = 11.0428(1) |                                                   |
|                                                                                            | $\alpha = 90$ $\beta = 94.993(1)$ $\gamma = 90$   |                                                   |
| Temperature:                                                                               | 100 K                                             |                                                   |
|                                                                                            | Calculated                                        | Reported                                          |
| Volume                                                                                     | 1410.68(3)                                        | 1410.68(3)                                        |
| Space group                                                                                | P 21/n                                            | P 1 21/n 1                                        |
| Hall group                                                                                 | –P 2yn                                            | –P 2yn                                            |
| Moiety formula                                                                             | C <sub>14</sub> H <sub>25</sub> NO <sub>2</sub> S | C <sub>14</sub> H <sub>25</sub> NO <sub>2</sub> S |
| Sum formula                                                                                | C <sub>14</sub> H <sub>25</sub> NO <sub>2</sub> S | C <sub>14</sub> H <sub>25</sub> NO <sub>2</sub> S |
| M <sub>r</sub>                                                                             | 271.41                                            | 271.41                                            |
| D <sub>x</sub> , g cm <sup>–3</sup>                                                        | 1.278                                             | 1.278                                             |
| Z                                                                                          | 4                                                 | 4                                                 |
| Mu (mm <sup>–1</sup> )                                                                     | 1.992                                             | 1.992                                             |
| F <sub>000</sub>                                                                           | 592.0                                             | 592.0                                             |
| F <sub>000</sub> '                                                                         | 594.80                                            |                                                   |
| h,k,l <sub>max</sub>                                                                       | 8,24,13                                           | 8,24,13                                           |
| N <sub>ref</sub>                                                                           | 2956                                              | 2875                                              |
| T <sub>min</sub> , T <sub>max</sub>                                                        | 0.776, 0.896                                      | 0.676, 1.000                                      |
| T <sub>min</sub> '                                                                         | 0.596                                             |                                                   |
| Correction method = # Reported T Limits: T <sub>min</sub> = 0.676 T <sub>max</sub> = 1.000 |                                                   |                                                   |
| AbsCorr = GAUSSIAN                                                                         |                                                   |                                                   |
| Data completeness = 0.973                                                                  | Theta(max) = 76.467                               |                                                   |
| R(reflections) = 0.0321(2706)                                                              | wR2(reflections) = 0.0871(2875)                   |                                                   |
| S = 1.048                                                                                  | N <sub>par</sub> = 169                            |                                                   |

---

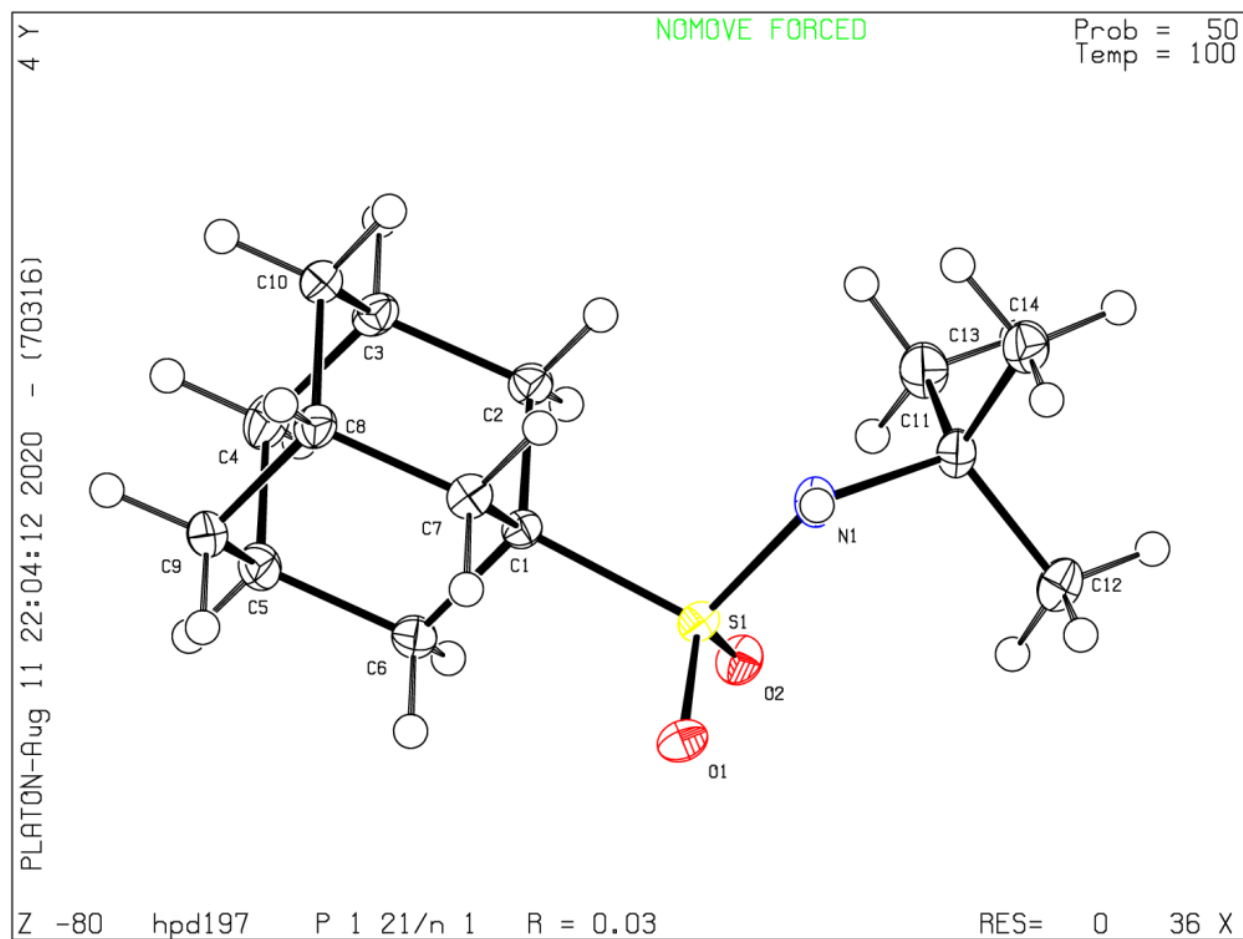

***N*-Benzyltetrahydro-2*H*-pyran-4-sulfonamide (4b)**

CCDC 2042744

---

|                                                                                            |                                                   |                                                   |
|--------------------------------------------------------------------------------------------|---------------------------------------------------|---------------------------------------------------|
| Bond precision:                                                                            | C–C = 0.0035 Å                                    | Wavelength = 1.54184                              |
| Cell:                                                                                      | a = 5.4965(2)    b = 24.4849(12)    c = 9.7713(4) |                                                   |
|                                                                                            | α = 90    β = 105.544(4)    γ = 90                |                                                   |
| Temperature:                                                                               | 100 K                                             |                                                   |
|                                                                                            | Calculated                                        | Reported                                          |
| Volume                                                                                     | 1266.94(10)                                       | 1266.94(10)                                       |
| Space group                                                                                | P 21/n                                            | P 1 21/n 1                                        |
| Hall group                                                                                 | –P 2yn                                            | –P 2yn                                            |
| Moiety formula                                                                             | C <sub>12</sub> H <sub>17</sub> NO <sub>3</sub> S | C <sub>12</sub> H <sub>17</sub> NO <sub>3</sub> S |
| Sum formula                                                                                | C <sub>12</sub> H <sub>17</sub> NO <sub>3</sub> S | C <sub>12</sub> H <sub>17</sub> NO <sub>3</sub> S |
| M <sub>r</sub>                                                                             | 255.33                                            | 255.32                                            |
| D <sub>x</sub> , g cm <sup>–3</sup>                                                        | 1.339                                             | 1.339                                             |
| Z                                                                                          | 4                                                 | 4                                                 |
| Mu (mm <sup>–1</sup> )                                                                     | 2.256                                             | 2.256                                             |
| F <sub>000</sub>                                                                           | 544.0                                             | 544.0                                             |
| F <sub>000</sub> '                                                                         | 546.85                                            |                                                   |
| h,k,l <sub>max</sub>                                                                       | 6,30,12                                           | 6,30,12                                           |
| N <sub>ref</sub>                                                                           | 2666                                              | 2554                                              |
| T <sub>min</sub> , T <sub>max</sub>                                                        | 0.709, 0.906                                      | 0.533, 1.000                                      |
| T <sub>min</sub> '                                                                         | 0.643                                             |                                                   |
| Correction method = # Reported T Limits: T <sub>min</sub> = 0.533 T <sub>max</sub> = 1.000 |                                                   |                                                   |
| AbsCorr = GAUSSIAN                                                                         |                                                   |                                                   |
| Data completeness = 0.958                                                                  | Theta(max) = 76.662                               |                                                   |
| R(reflections) = 0.0486(2308)                                                              | wR2(reflections) = 0.1239(2554)                   |                                                   |
| S = 1.084                                                                                  | N <sub>par</sub> = 157                            |                                                   |

---

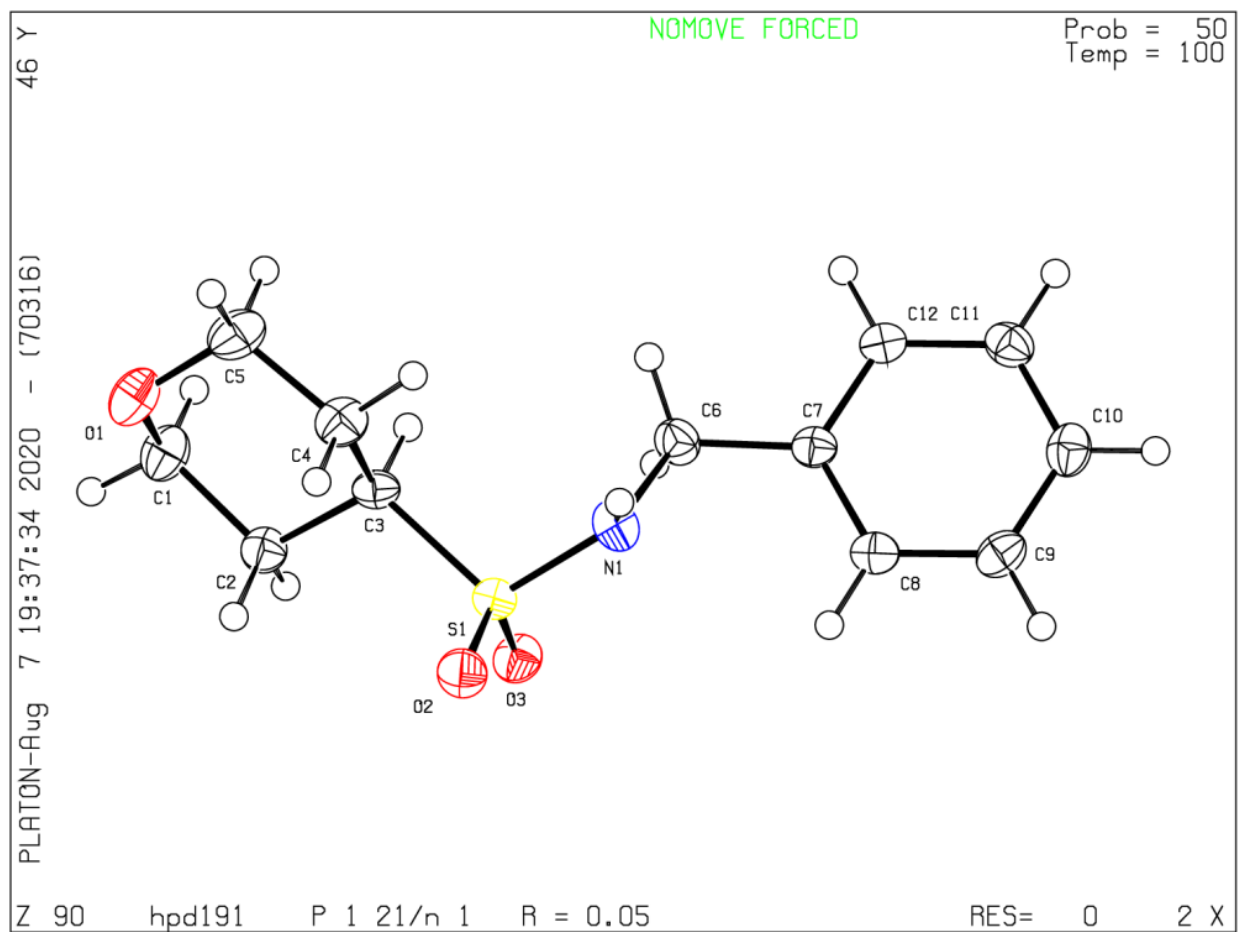

**N-Benzyladamantane-1-sulfonamide (4d)****CCDC 2042745**


---

|                                                                                            |                                                   |                                                   |
|--------------------------------------------------------------------------------------------|---------------------------------------------------|---------------------------------------------------|
| Bond precision:                                                                            | C–C = 0.0033 Å                                    | Wavelength = 1.54184                              |
| Cell:                                                                                      | a = 14.0325(4)    b = 6.2686(1)    c = 18.2532(5) |                                                   |
|                                                                                            | $\alpha = 90$ $\beta = 110.571(3)$ $\gamma = 90$  |                                                   |
| Temperature:                                                                               | 100 K                                             |                                                   |
|                                                                                            | Calculated                                        | Reported                                          |
| Volume                                                                                     | 1503.25(7)                                        | 1503.25(7)                                        |
| Space group                                                                                | P 21/n                                            | P 1 21/n 1                                        |
| Hall group                                                                                 | -P 2yn                                            | -P 2yn                                            |
| Moiety formula                                                                             | C <sub>17</sub> H <sub>23</sub> NO <sub>2</sub> S | C <sub>17</sub> H <sub>23</sub> NO <sub>2</sub> S |
| Sum formula                                                                                | C <sub>17</sub> H <sub>23</sub> NO <sub>2</sub> S | C <sub>17</sub> H <sub>23</sub> NO <sub>2</sub> S |
| M <sub>r</sub>                                                                             | 305.42                                            | 305.42                                            |
| D <sub>x</sub> , g cm <sup>-3</sup>                                                        | 1.349                                             | 1.350                                             |
| Z                                                                                          | 4                                                 | 4                                                 |
| Mu (mm <sup>-1</sup> )                                                                     | 1.941                                             | 1.941                                             |
| F <sub>000</sub>                                                                           | 656.0                                             | 656.0                                             |
| F <sub>000</sub> '                                                                         | 659.00                                            |                                                   |
| h,k,l <sub>max</sub>                                                                       | 17,7,23                                           | 17,7,23                                           |
| N <sub>ref</sub>                                                                           | 3159                                              | 5689                                              |
| T <sub>min</sub> , T <sub>max</sub>                                                        | 0.760, 0.956                                      | 0.807, 1.000                                      |
| T <sub>min</sub> '                                                                         | 0.746                                             |                                                   |
| Correction method = # Reported T Limits: T <sub>min</sub> = 0.807 T <sub>max</sub> = 1.000 |                                                   |                                                   |
| AbsCorr = GAUSSIAN                                                                         |                                                   |                                                   |
| Data completeness = 1.801                                                                  | Theta <sub>(Max)</sub> = 76.687                   |                                                   |
| R(reflections) = 0.0445(5110)                                                              | wR2(reflections) = 0.1096(5689)                   |                                                   |
| S = 1.082                                                                                  | N <sub>par</sub> = 191                            |                                                   |

---

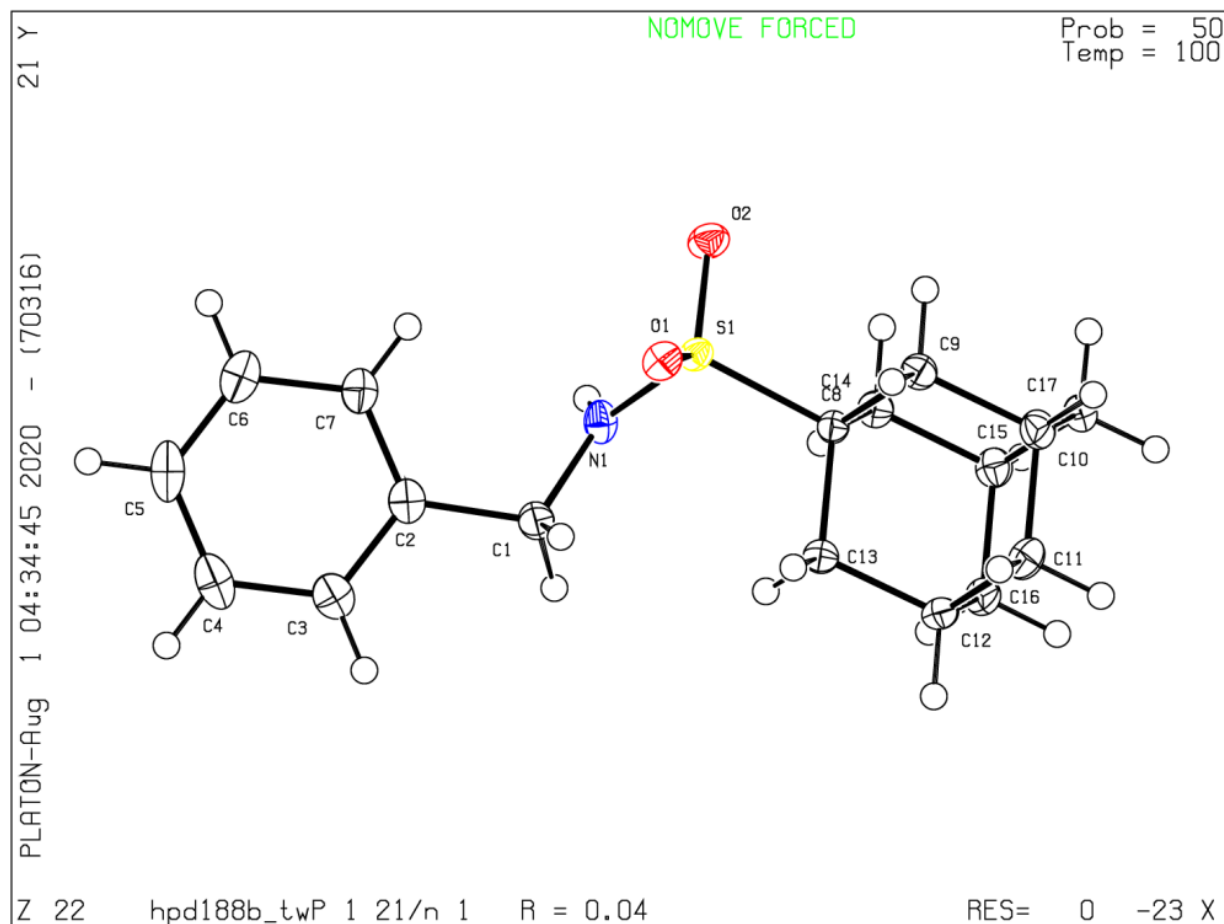

# 4-(5-Methylthiophen-2-yl)-4-oxobutane-1-sulfonyl azide (9d)

CCDC 2042746

---

Bond precision: C-C = 0.0024 Å Wavelength = 1.54184

Cell: a = 5.4957(1) b = 5.8614(2) c = 18.6487(6)  
 $\alpha$  = 83.542(3)  $\beta$  = 88.913(2)  $\gamma$  = 82.753(2)

Temperature: 100 K

|                                     | Calculated                                                                  | Reported                                                                    |
|-------------------------------------|-----------------------------------------------------------------------------|-----------------------------------------------------------------------------|
| Volume                              | 592.13(3)                                                                   | 592.13(3)                                                                   |
| Space group                         | P -1                                                                        | P -1                                                                        |
| Hall group                          | -P 1                                                                        | -P 1                                                                        |
| Moiety formula                      | C <sub>9</sub> H <sub>11</sub> N <sub>3</sub> O <sub>3</sub> S <sub>2</sub> | C <sub>9</sub> H <sub>11</sub> N <sub>3</sub> O <sub>3</sub> S <sub>2</sub> |
| Sum formula                         | C <sub>9</sub> H <sub>11</sub> N <sub>3</sub> O <sub>3</sub> S <sub>2</sub> | C <sub>9</sub> H <sub>11</sub> N <sub>3</sub> O <sub>3</sub> S <sub>2</sub> |
| M <sub>r</sub>                      | 273.33                                                                      | 273.33                                                                      |
| D <sub>x</sub> , g cm <sup>-3</sup> | 1.533                                                                       | 1.533                                                                       |
| Z                                   | 2                                                                           | 2                                                                           |
| Mu (mm <sup>-1</sup> )              | 4.116                                                                       | 4.116                                                                       |
| F <sub>000</sub>                    | 284.0                                                                       | 284.0                                                                       |
| F <sub>000</sub> '                  | 286.10                                                                      |                                                                             |
| h,k,l <sub>max</sub>                | 6,7,23                                                                      | 6,7,23                                                                      |
| N <sub>ref</sub>                    | 2498                                                                        | 2363                                                                        |
| T <sub>min</sub> , T <sub>max</sub> | 0.628, 0.913                                                                | 0.568, 1.000                                                                |
| T <sub>min</sub> '                  | 0.495                                                                       |                                                                             |

Correction method = # Reported T Limits: T<sub>min</sub> = 0.568 T<sub>max</sub> = 1.000

AbsCorr = GAUSSIAN

Data completeness = 0.946

Theta(max) = 76.591

R(reflections) = 0.0375(2181)

wR2(reflections) = 0.1002(2363)

S = 1.080

N<sub>par</sub> = 155



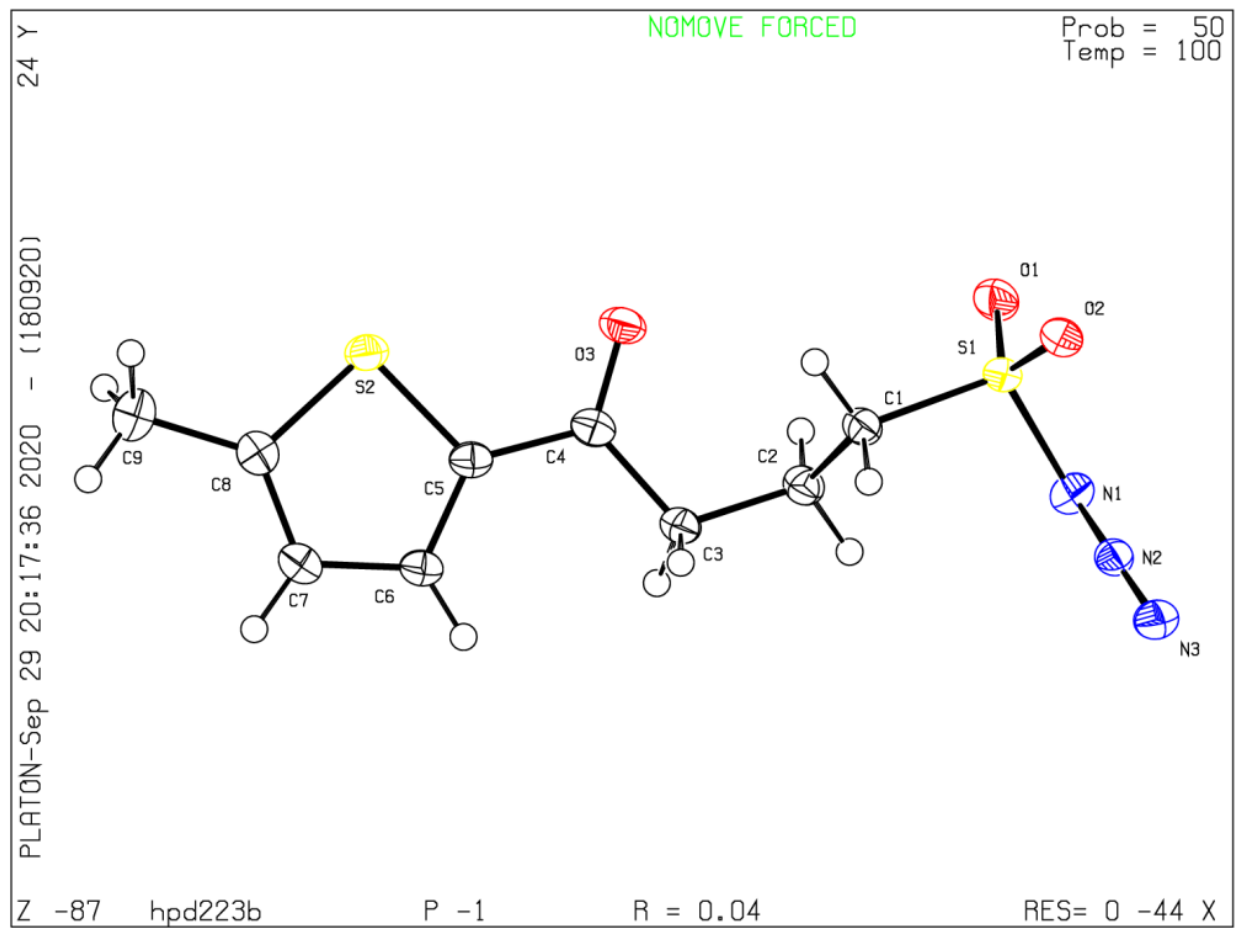

## NMR Spectroscopic Data

### 2,7-Dimethyl-9-(*o*-tolyl)acridine (A3)

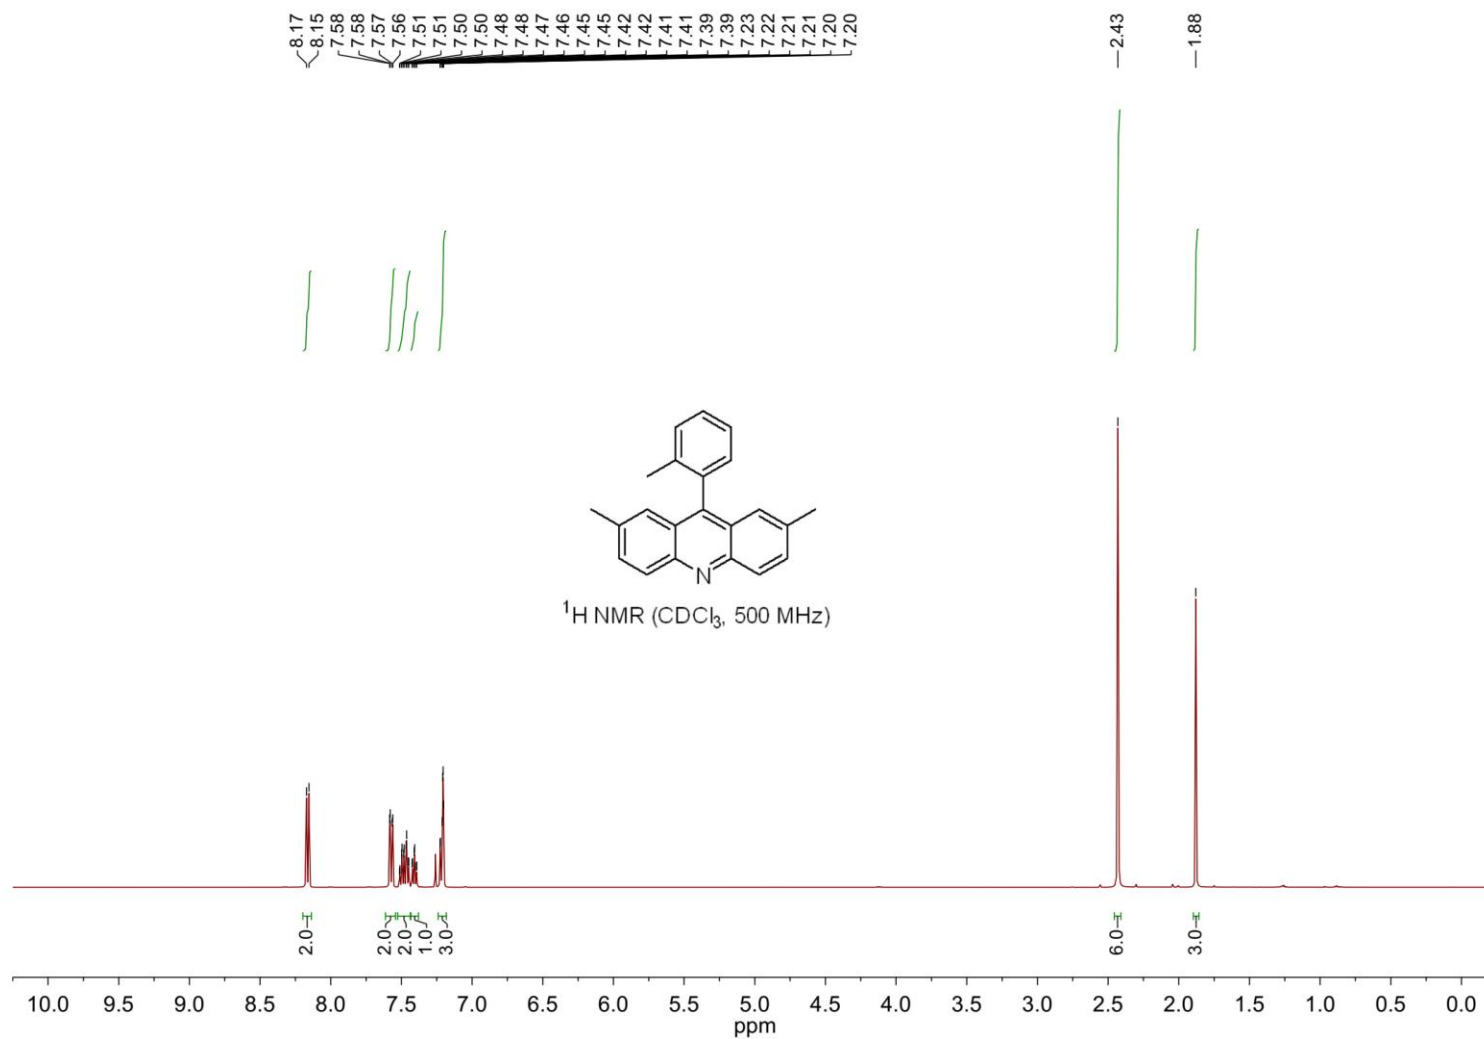

2,7-Dimethyl-9-(*o*-tolyl)acridine (A3)

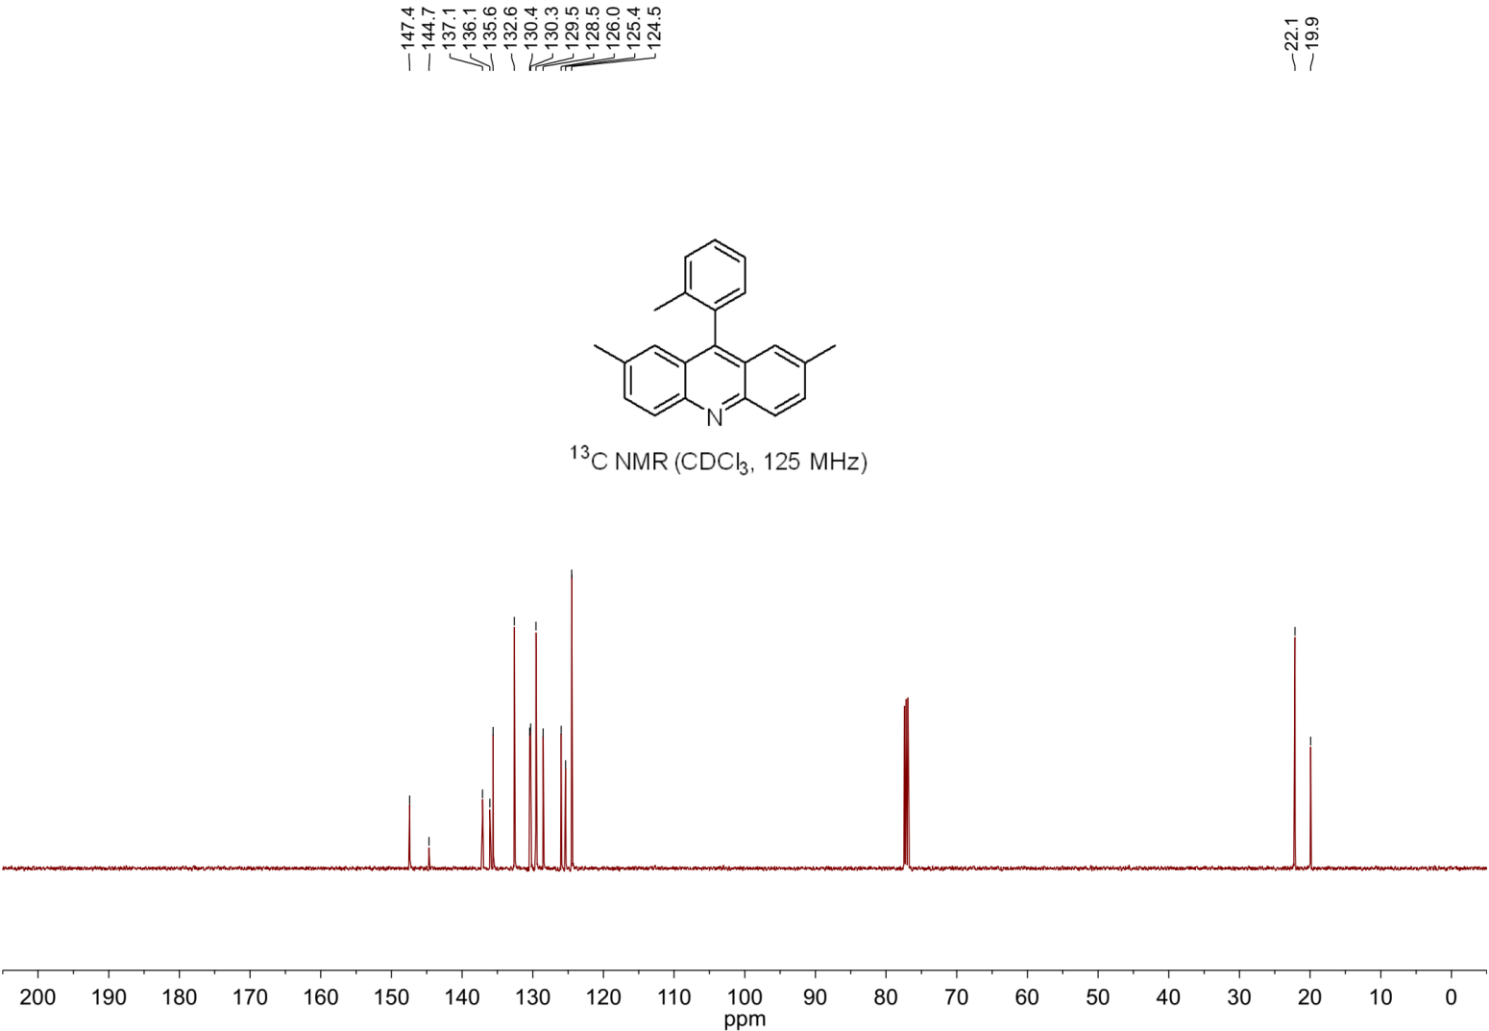

4-(Pentadecylsulfonyl)morpholine (1a)

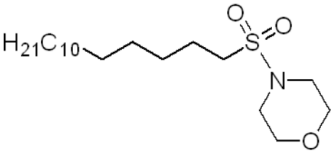

<sup>1</sup>H NMR (500 MHz, CDCl<sub>3</sub>)

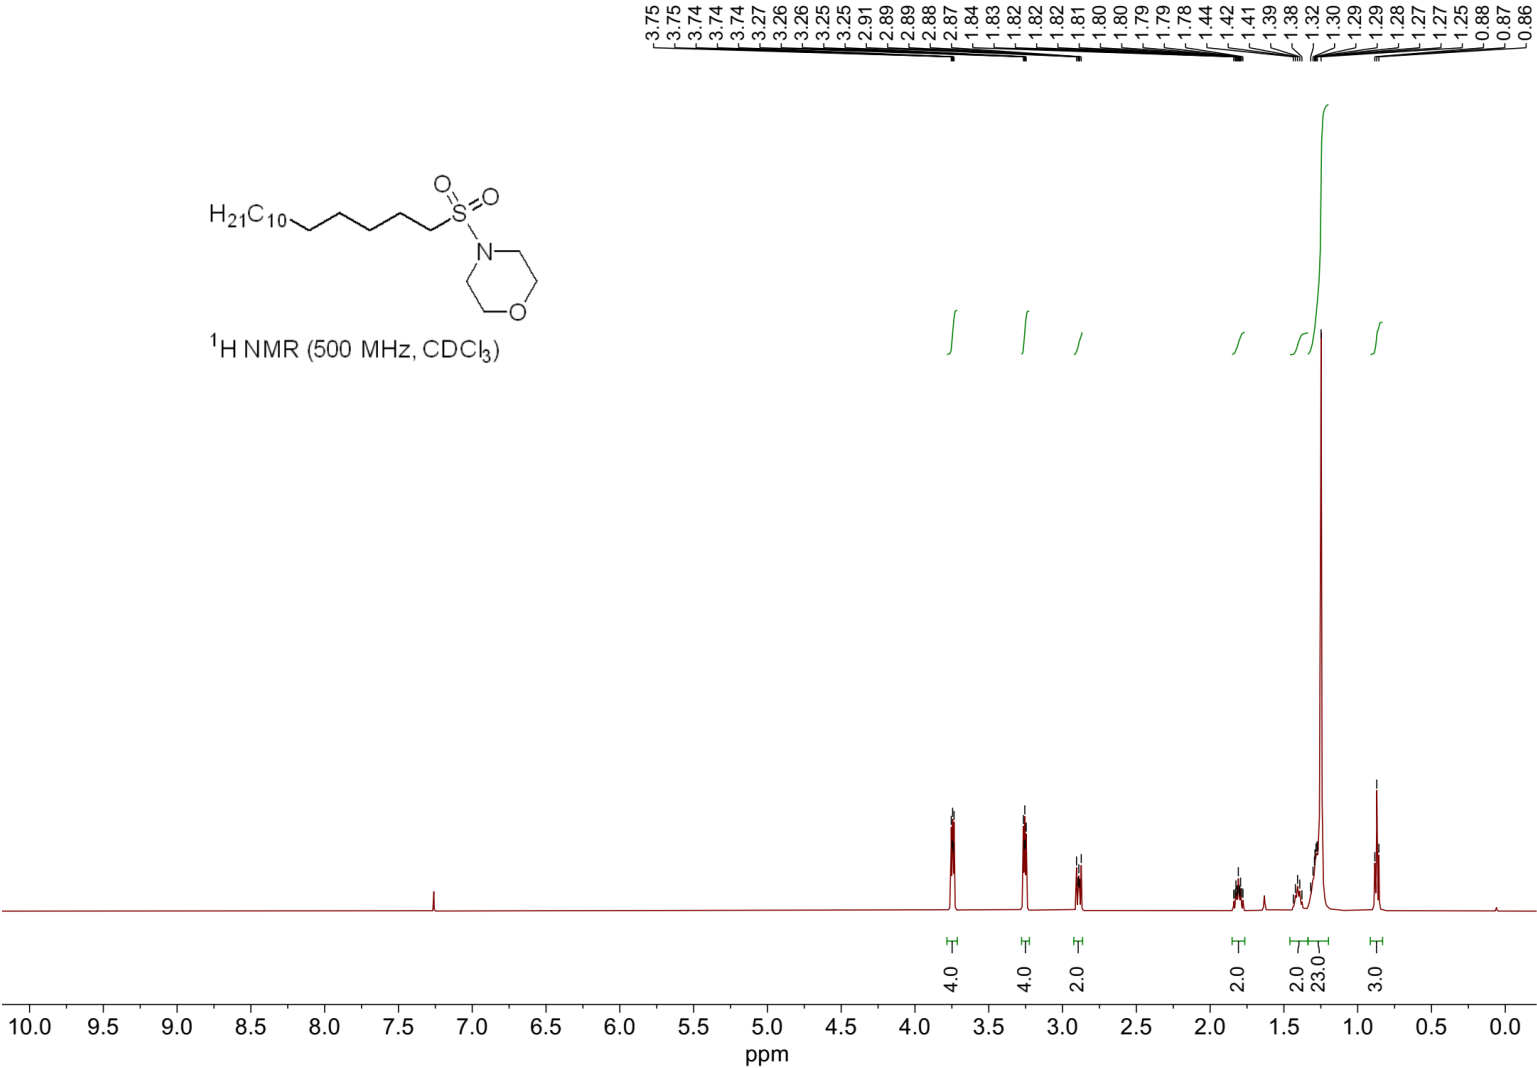

4-(Pentadecylsulfonyl)morpholine (1a)

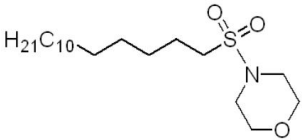

<sup>13</sup>C NMR (125 MHz, CDCl<sub>3</sub>)

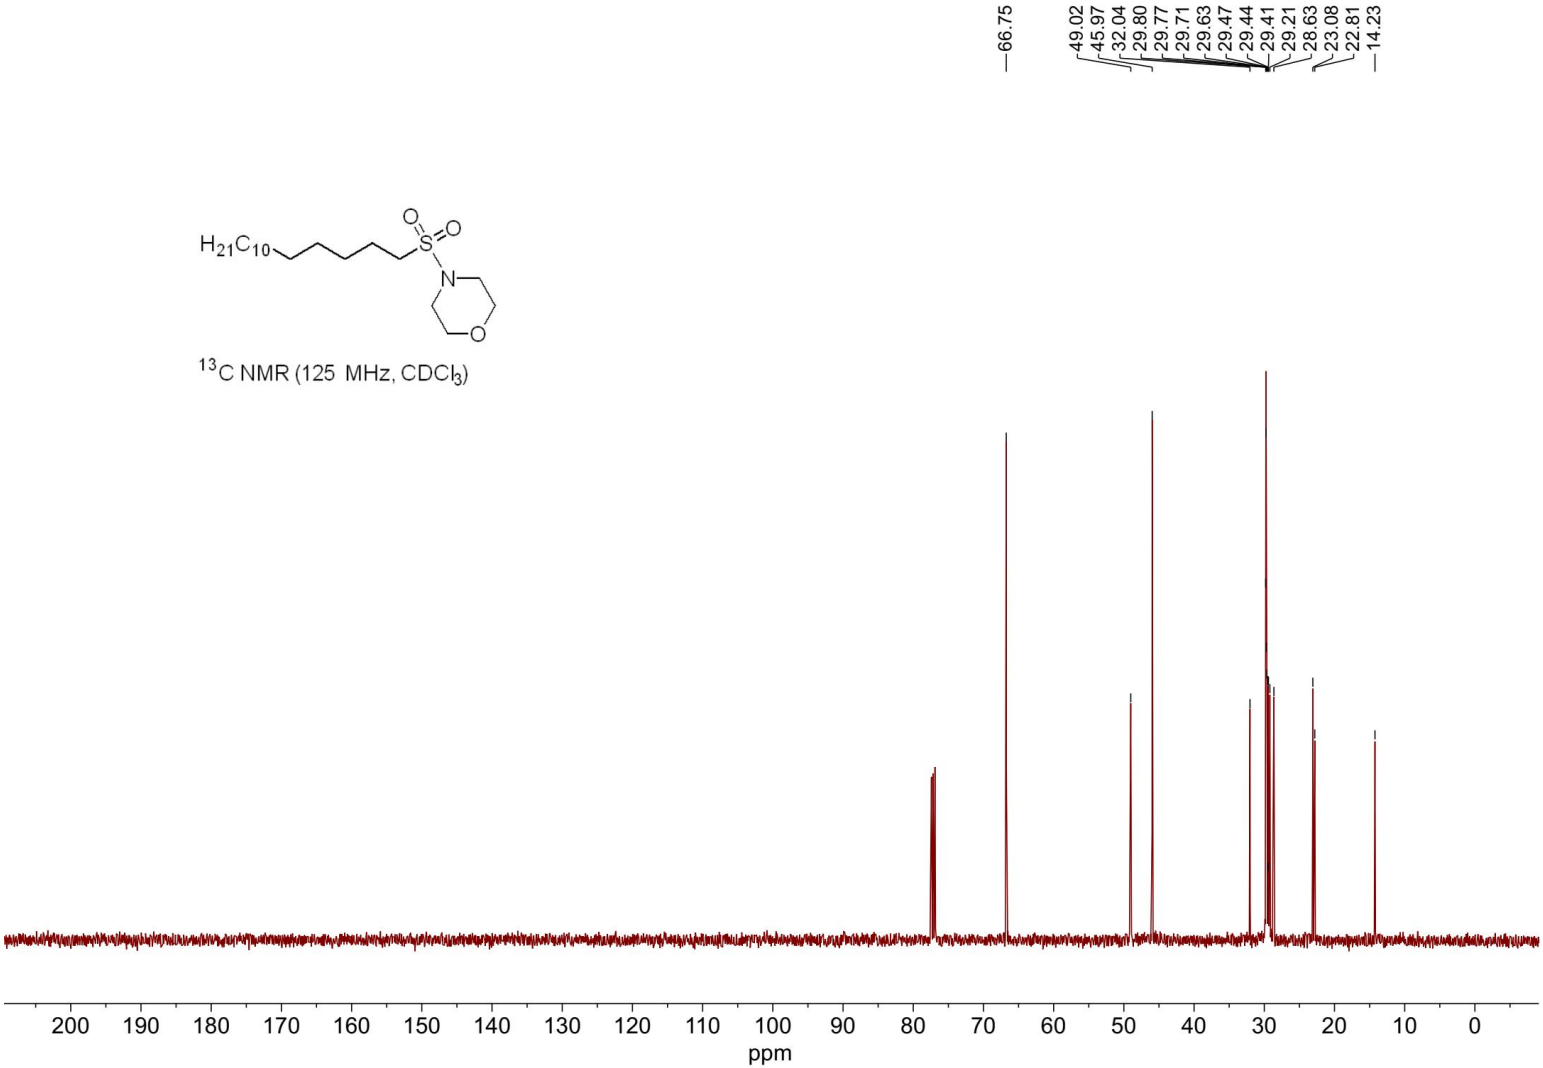

# 4-(Morpholinosulfonyl)-1-phenylbutan-1-one (1b)

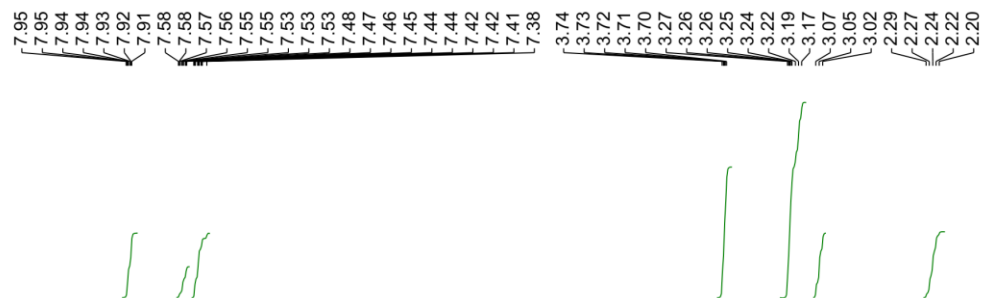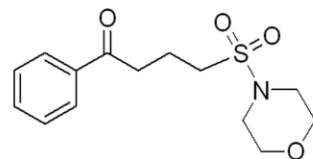

<sup>1</sup>H NMR (300 MHz, CDCl<sub>3</sub>)

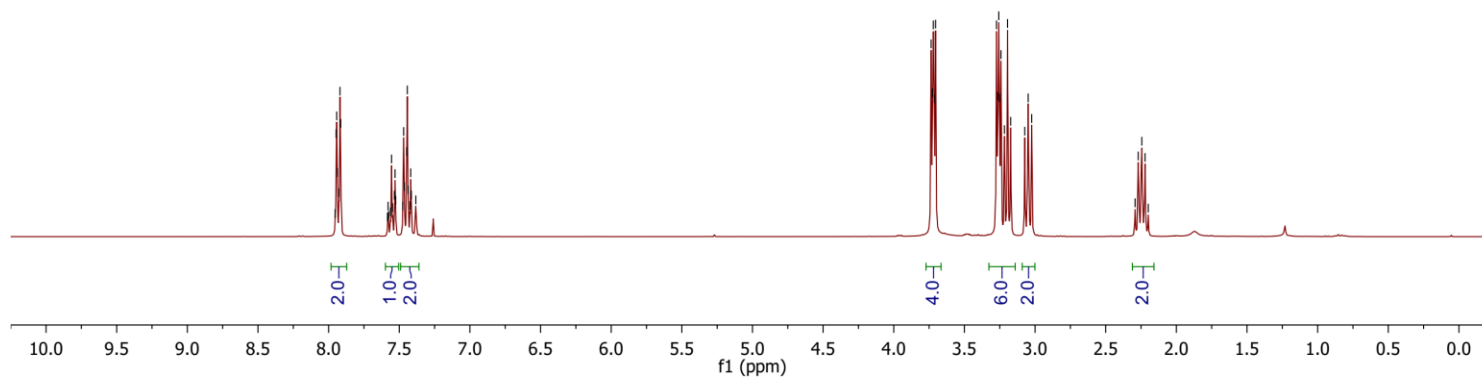

4-(Morpholinosulfonyl)-1-phenylbutan-1-one (1b)

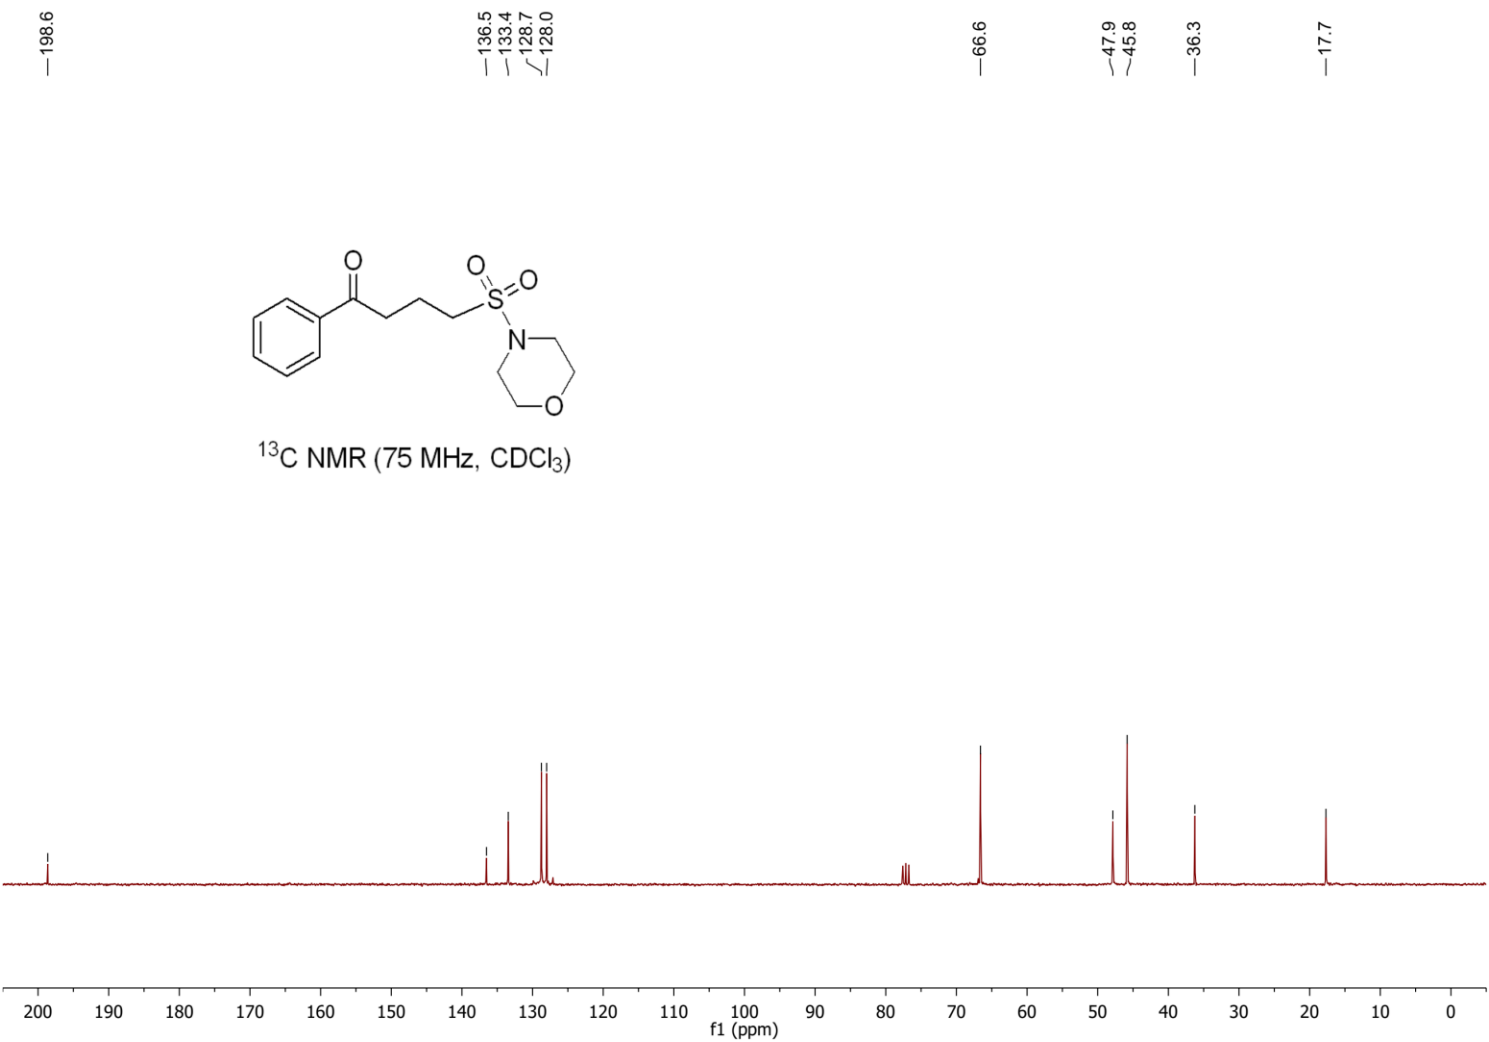

# 4-((3,4-Dimethoxyphenethyl)sulfonyl)morpholine (1c)

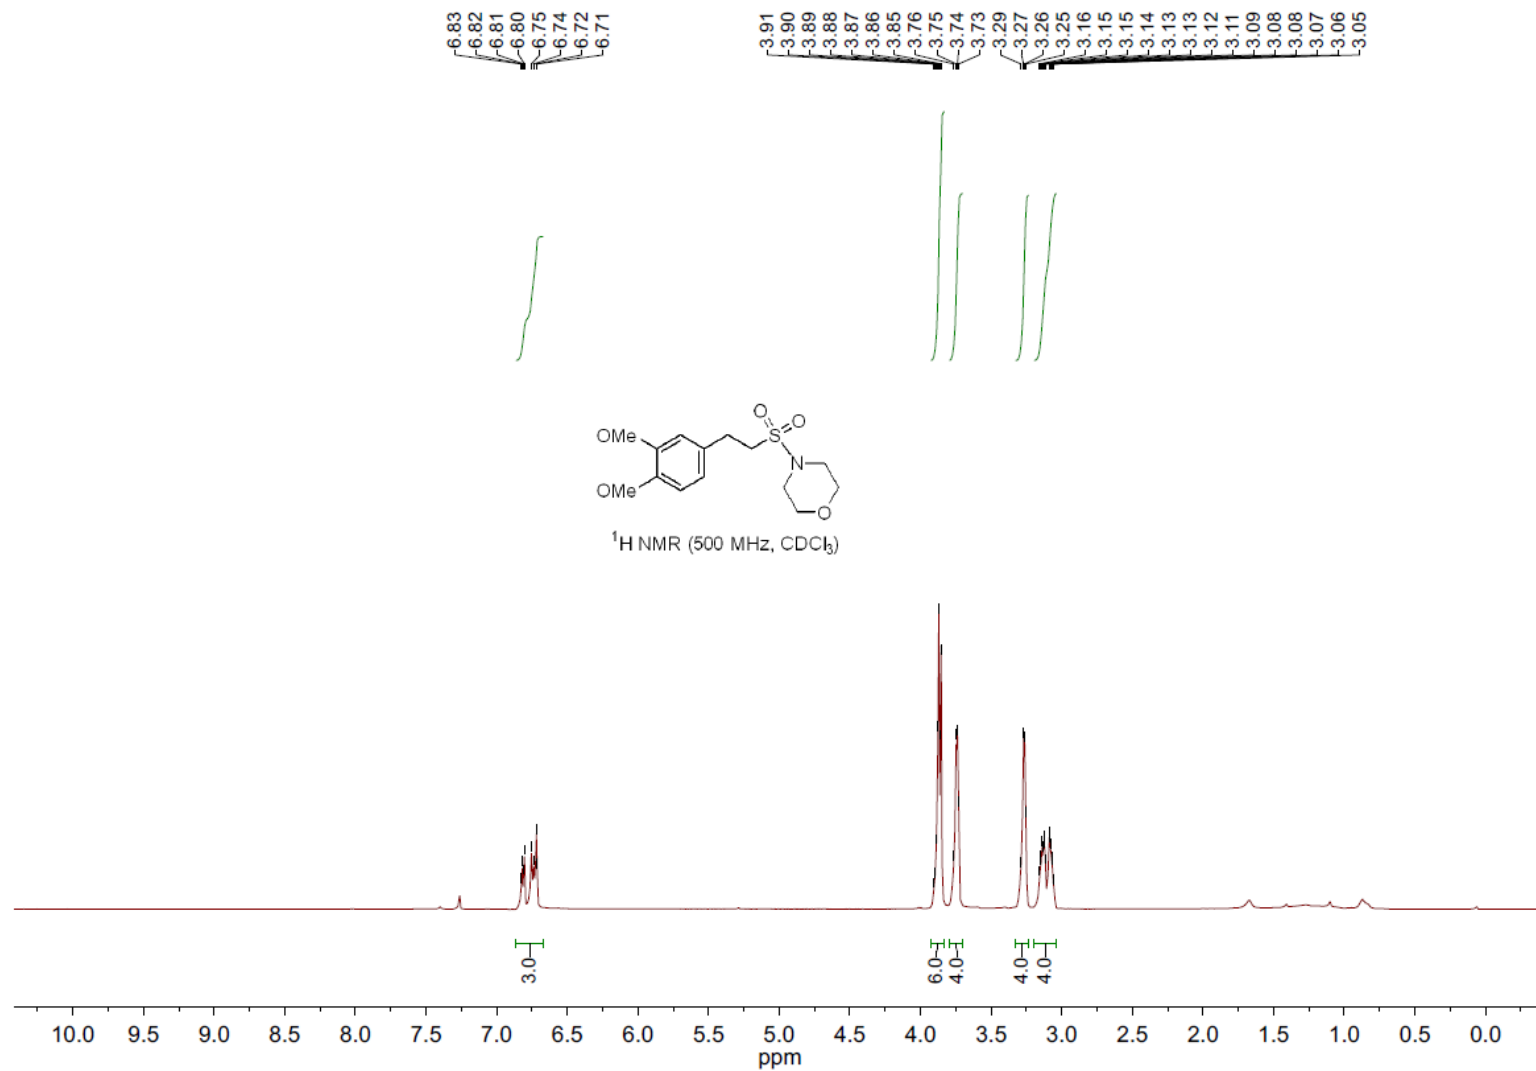



### 4-((3,4-Dimethoxyphenethyl)sulfonyl)morpholine (1c)

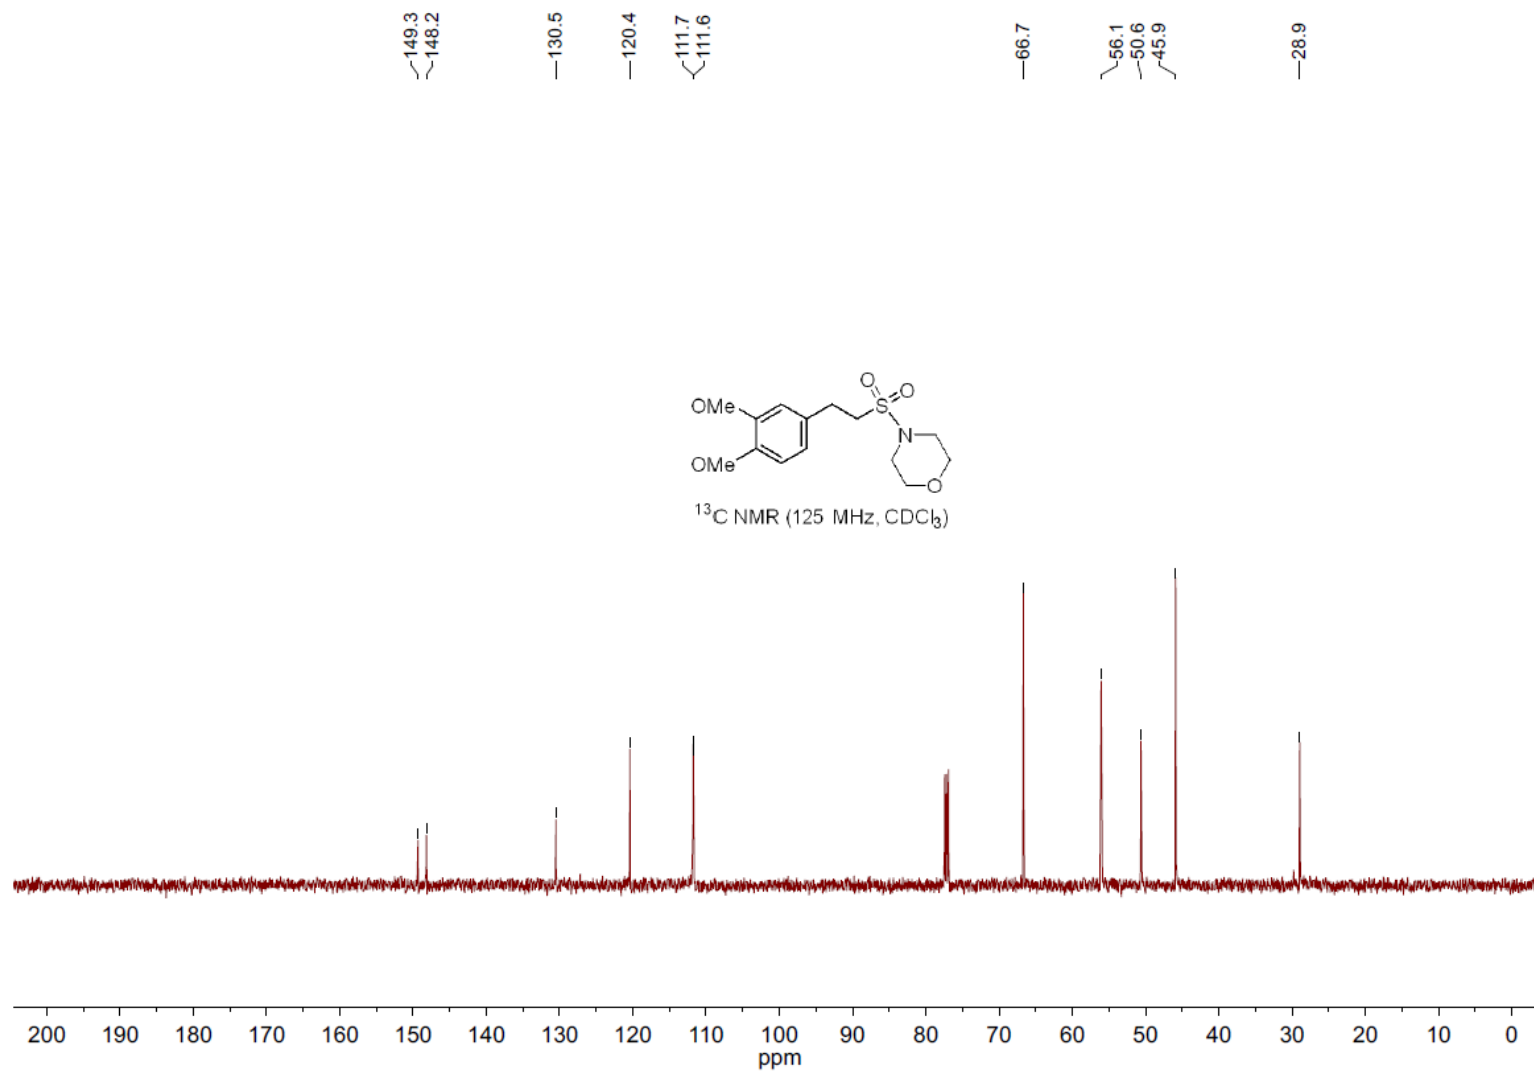

**N-(3-(Morpholinosulfonyl)propyl)-3-(4,4,5,5-tetramethyl-1,3,2-dioxaborolan-2-yl)benzamide (1d)**

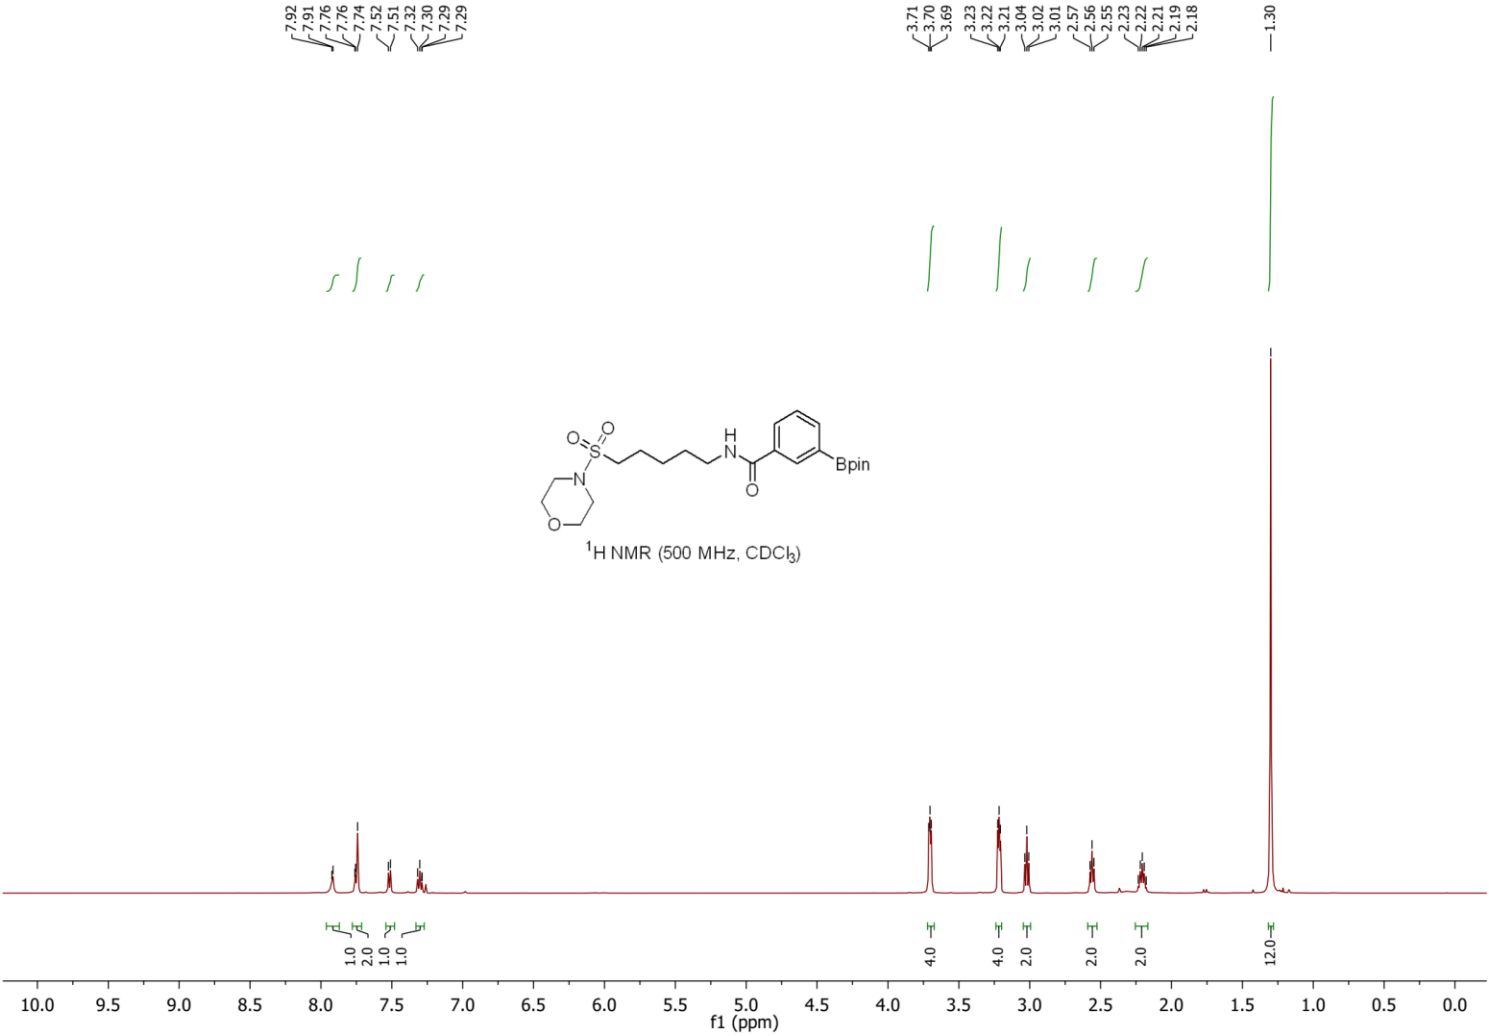

***N*-(3-(Morpholinosulfonyl)propyl)-3-(4,4,5,5-tetramethyl-1,3,2-dioxaborolan-2-yl)benzamide (1d)**

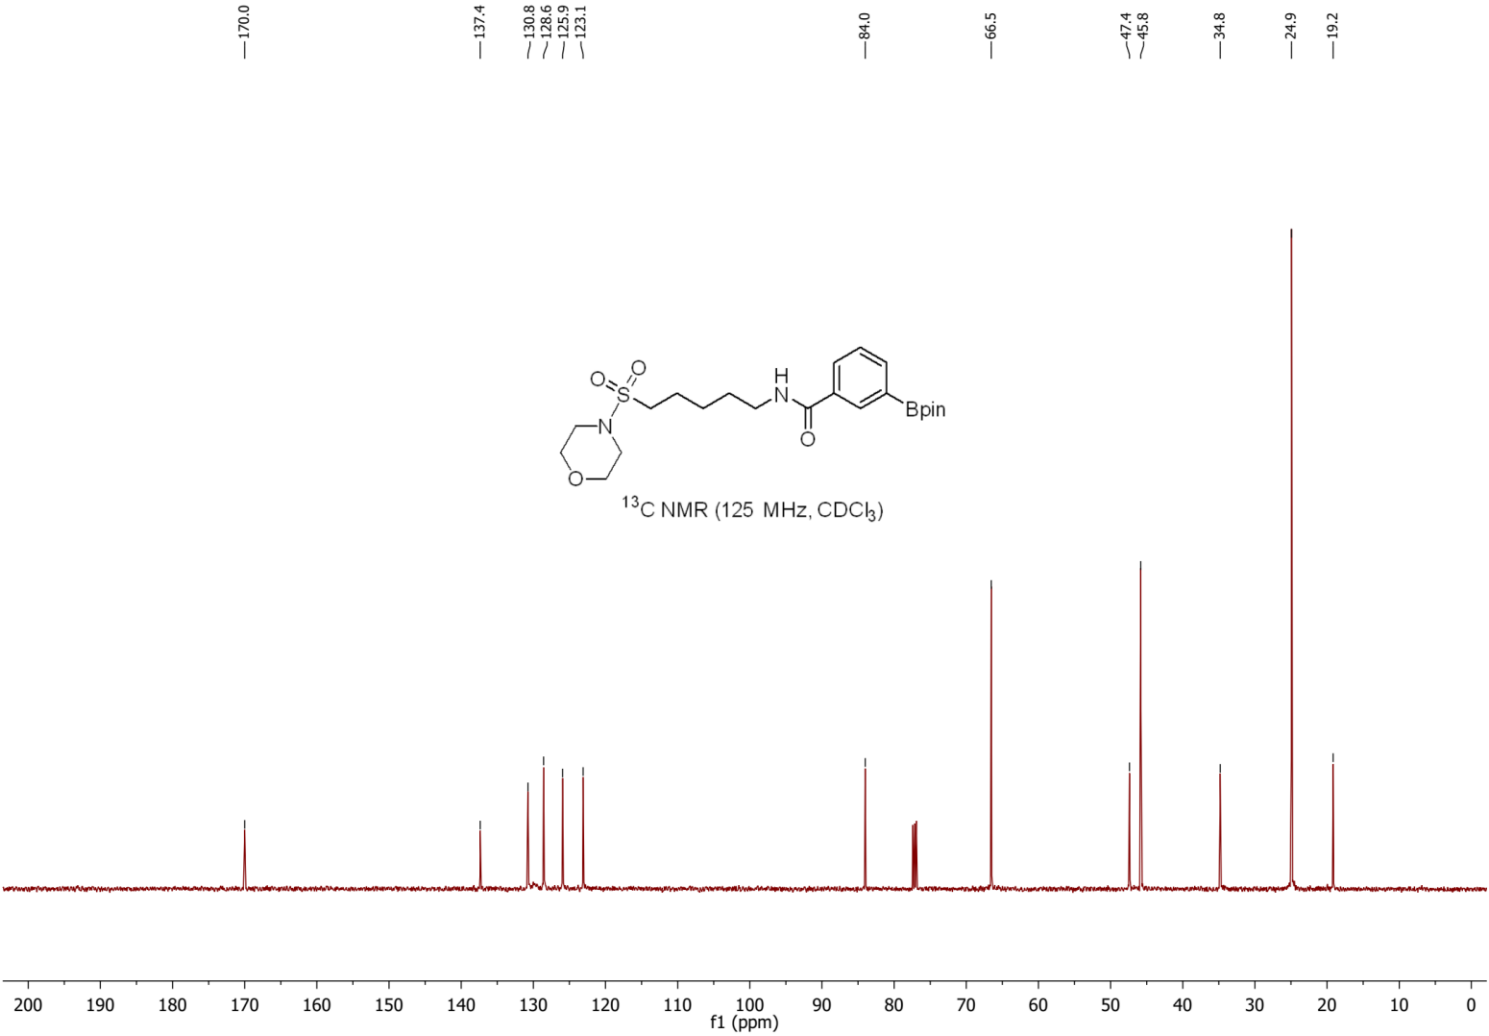

### 3-(Morpholinosulfonyl)-1-phenylpropan-1-one (1e)

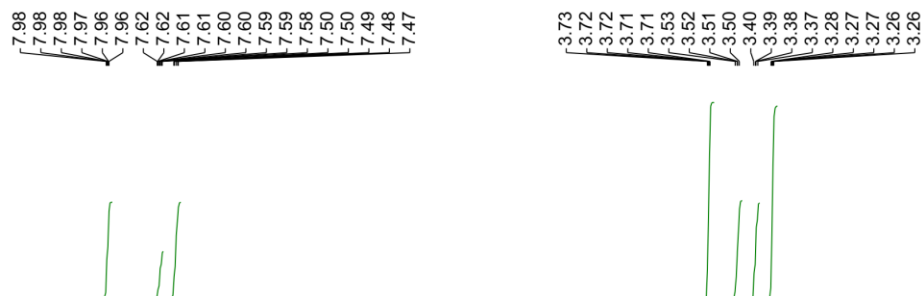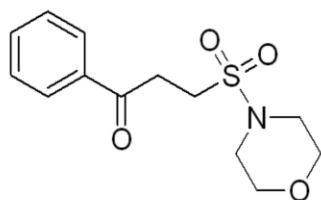

<sup>1</sup>H NMR (500 MHz, CDCl<sub>3</sub>)

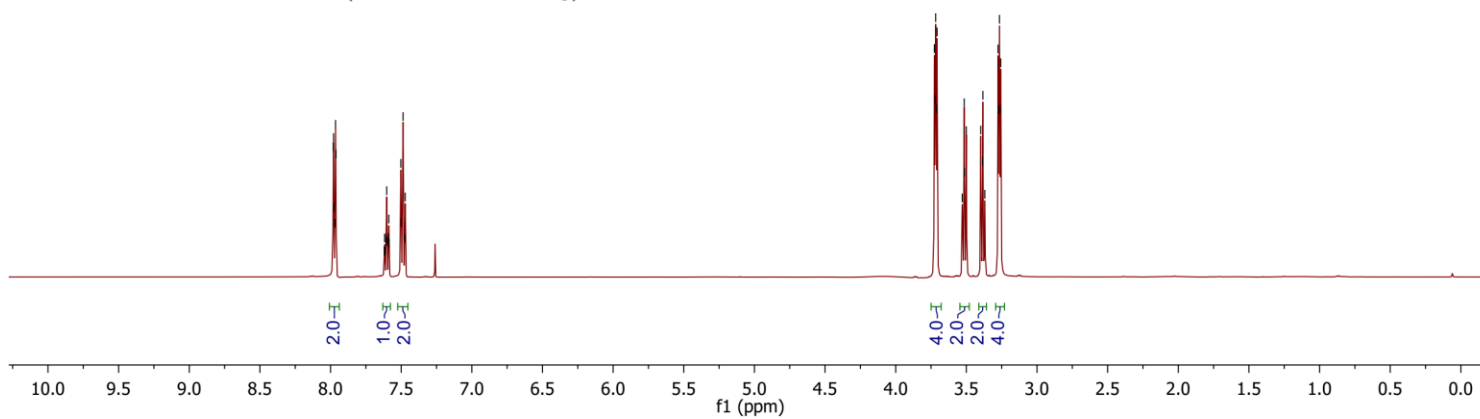

### 3-(Morpholinosulfonyl)-1-phenylpropan-1-one (1e)

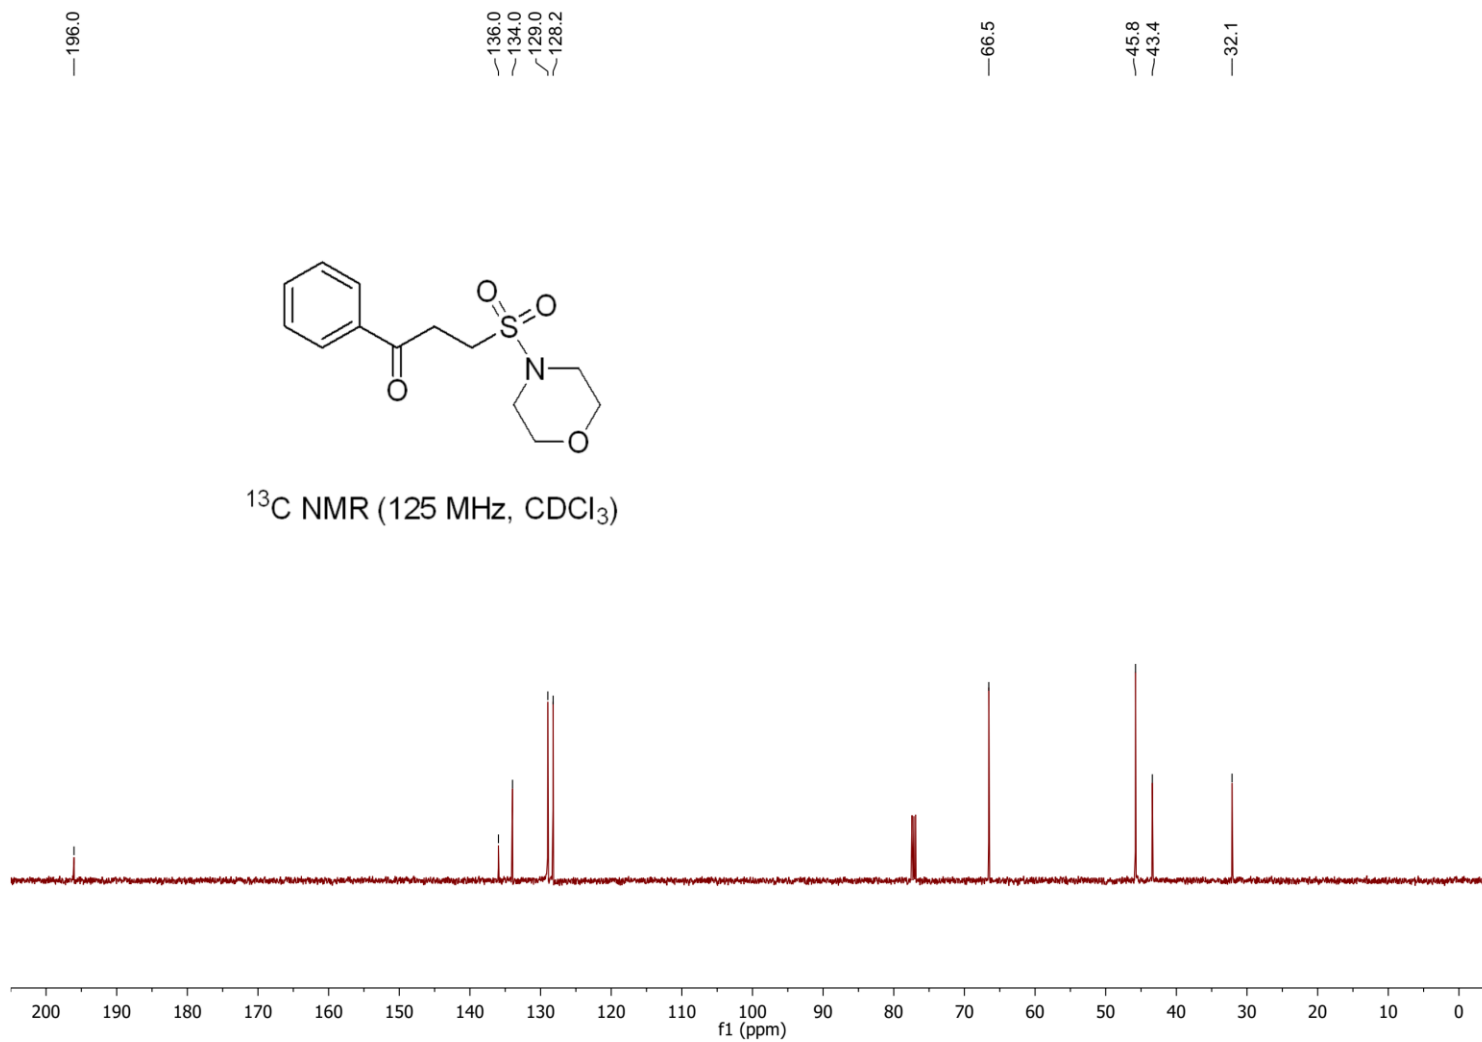

# 1-(5-Methylthiophen-2-yl)-4-(morpholinosulfonyl)butan-1-one (1f)

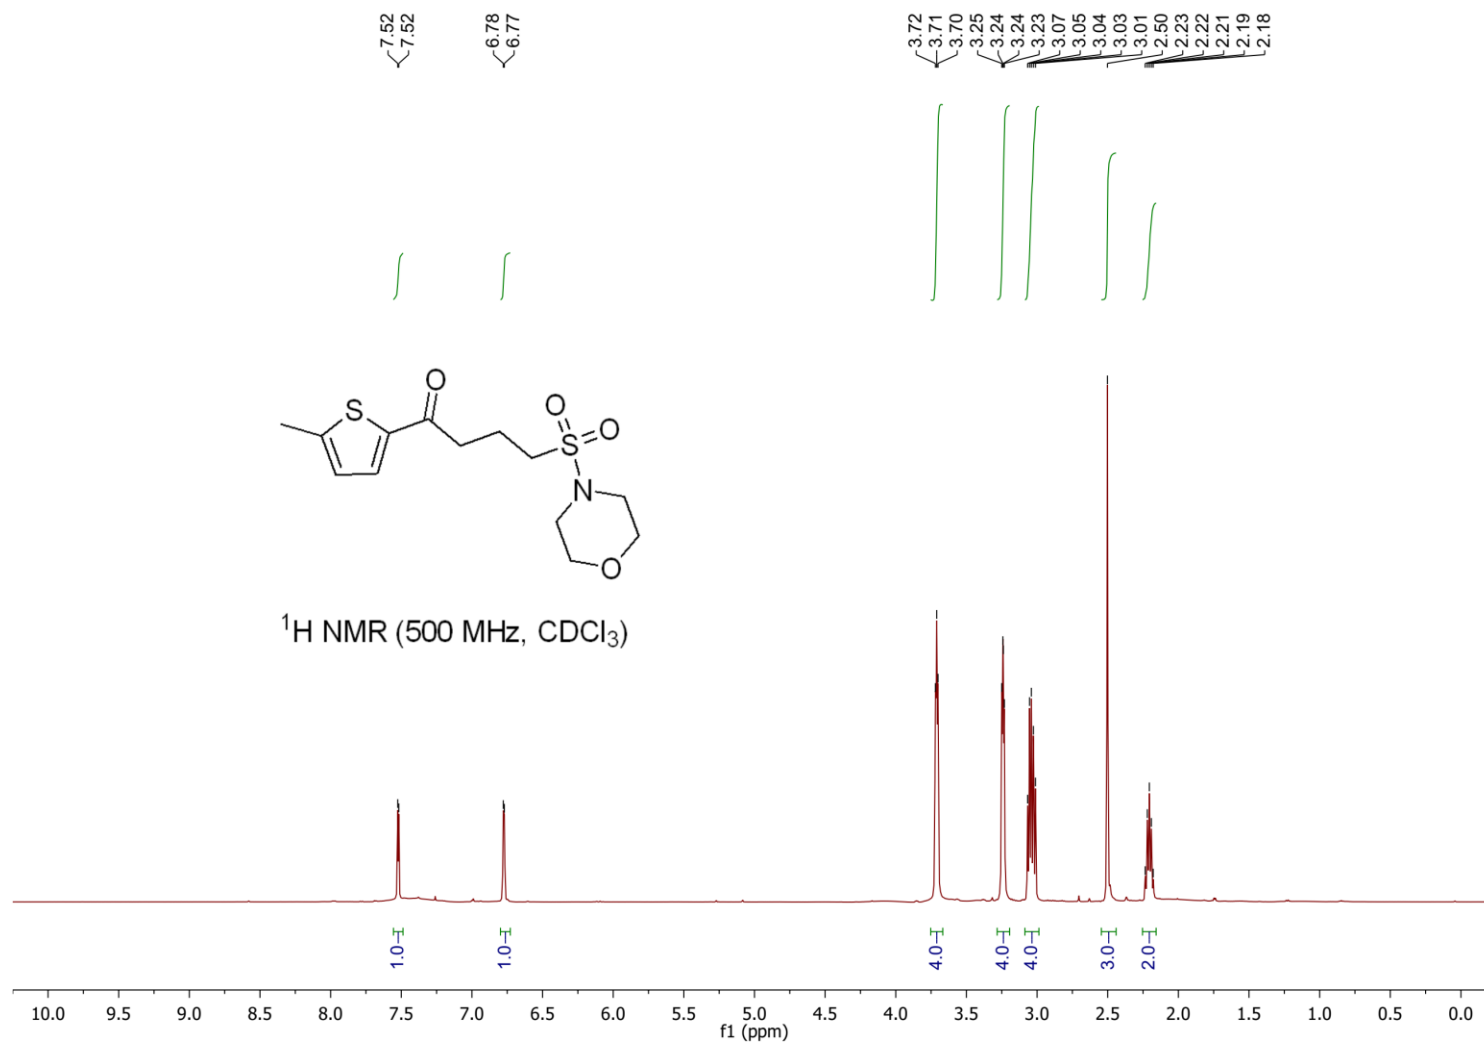

# 1-(5-Methylthiophen-2-yl)-4-(morpholinosulfonyl)butan-1-one (1f)

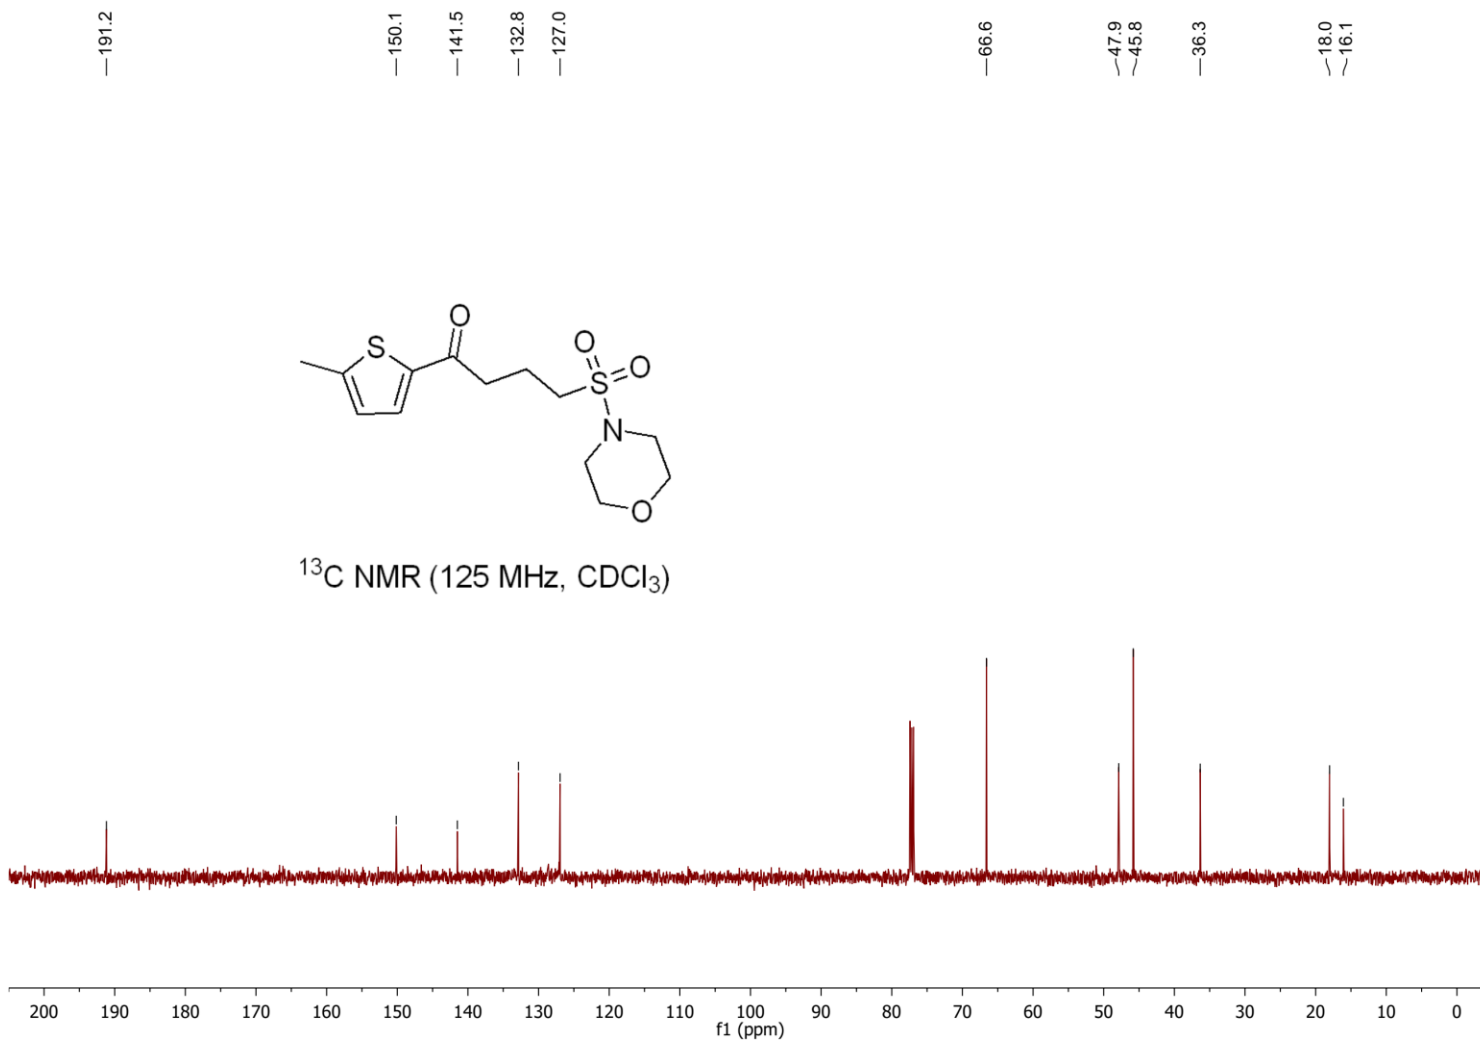

1,7-Bis(morpholinosulfonyl)heptane (1g)

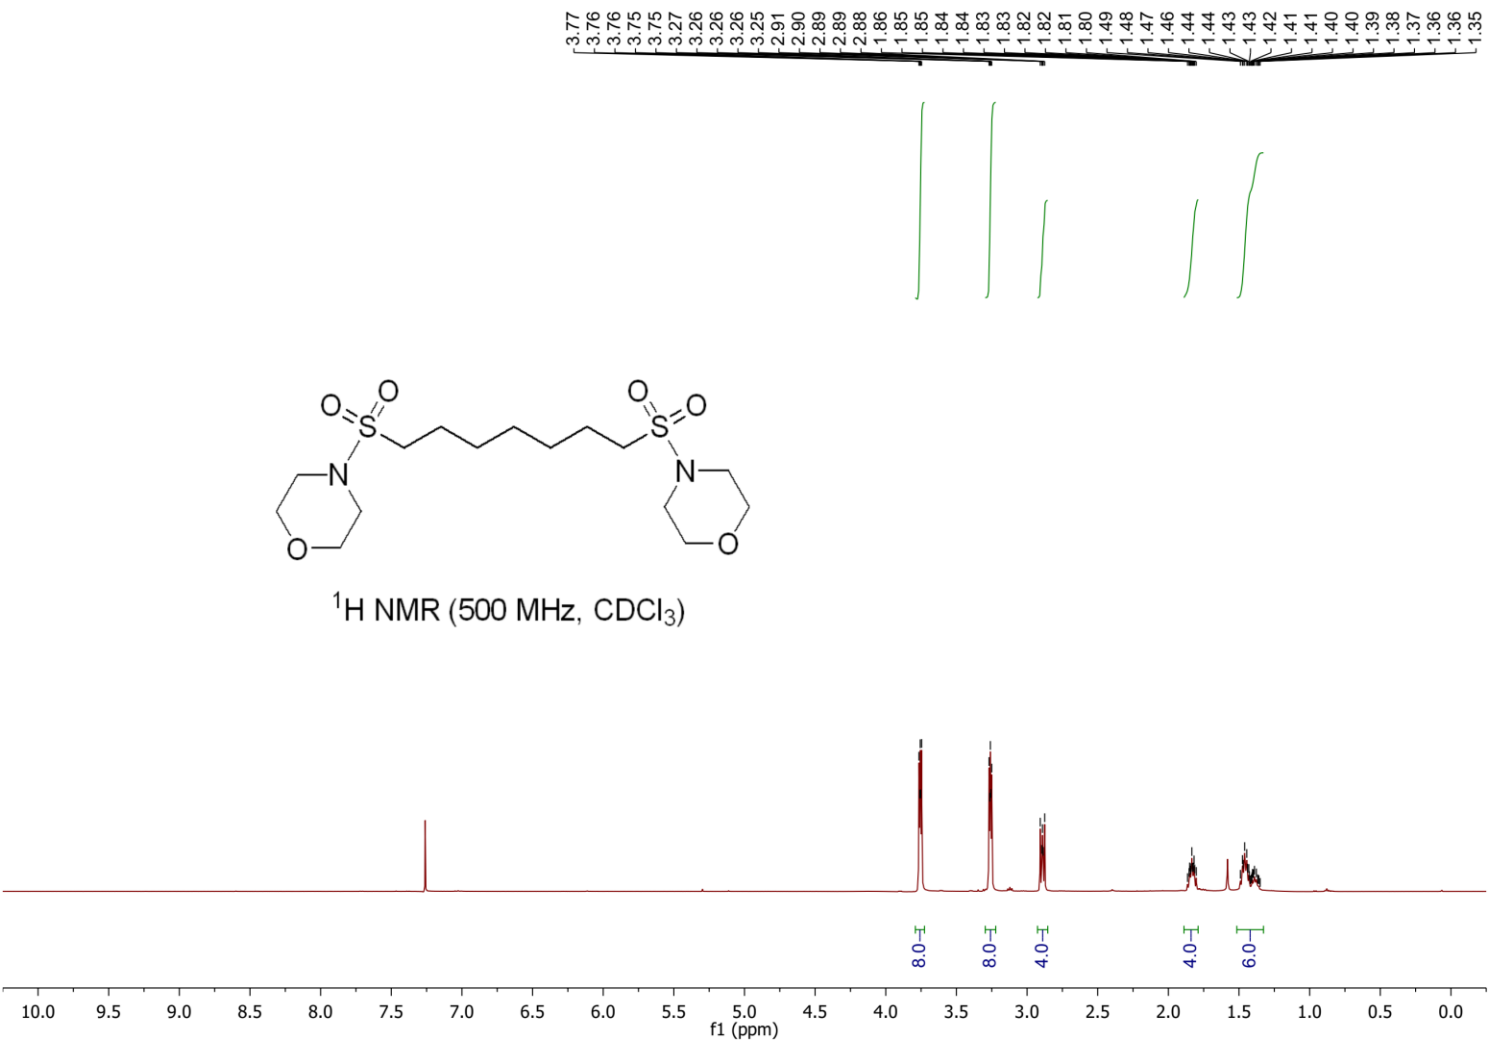



# 1,7-Bis(morpholinosulfonyl)heptane (1g)

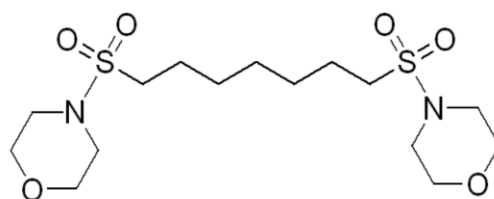

$^{13}\text{C}$  NMR (125 MHz,  $\text{CDCl}_3$ )

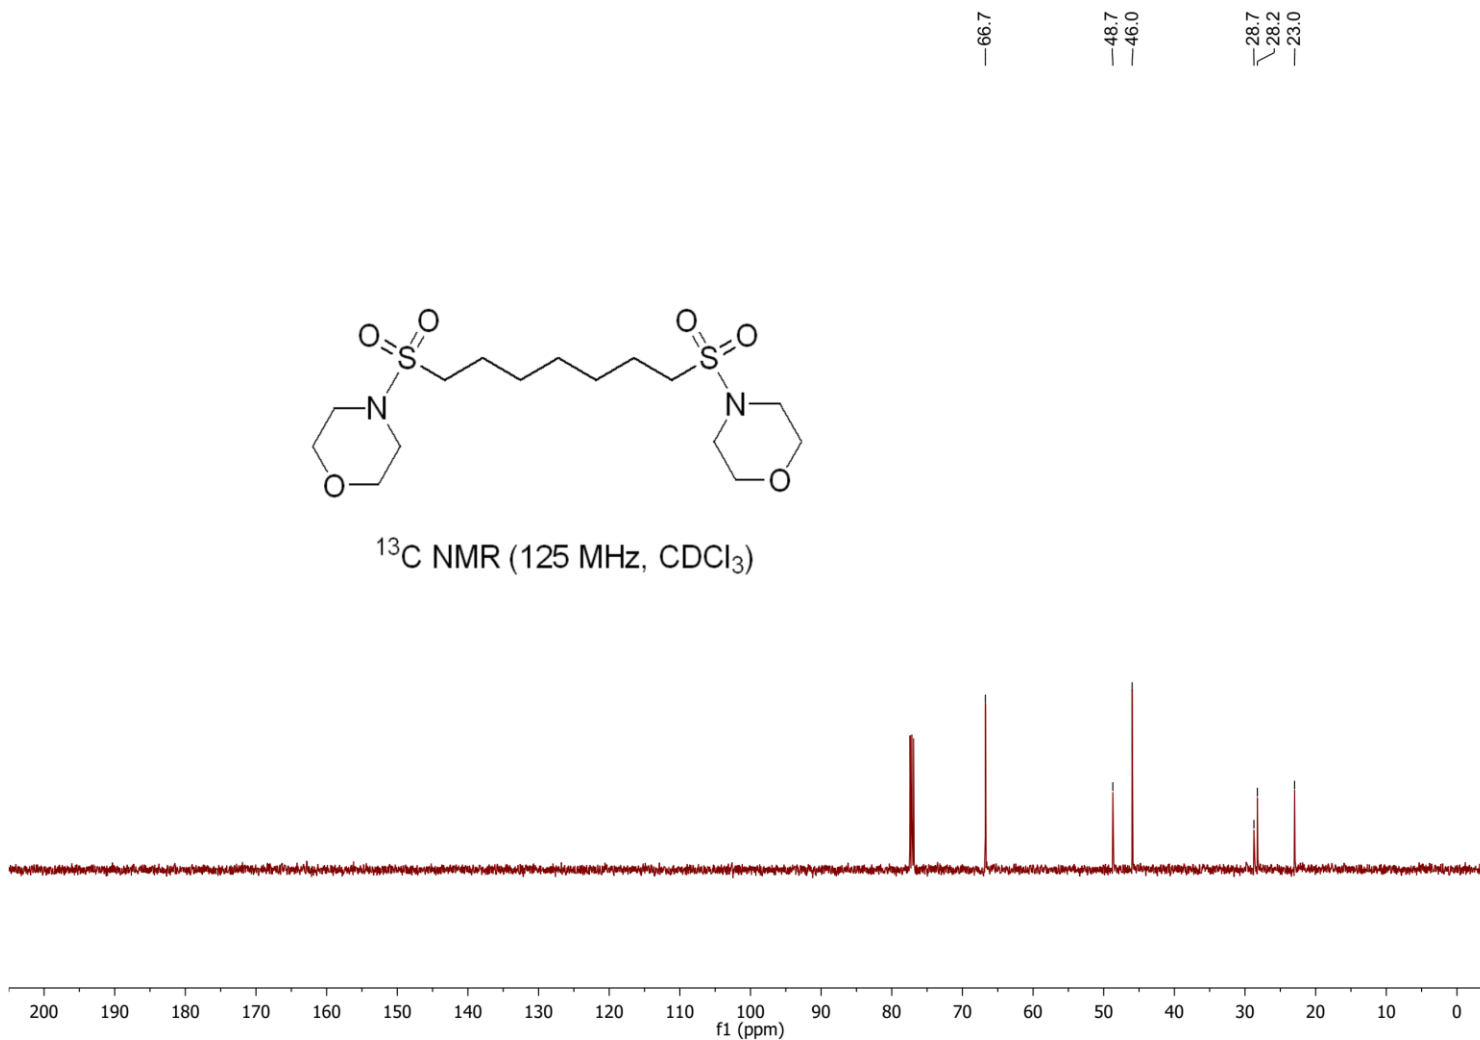

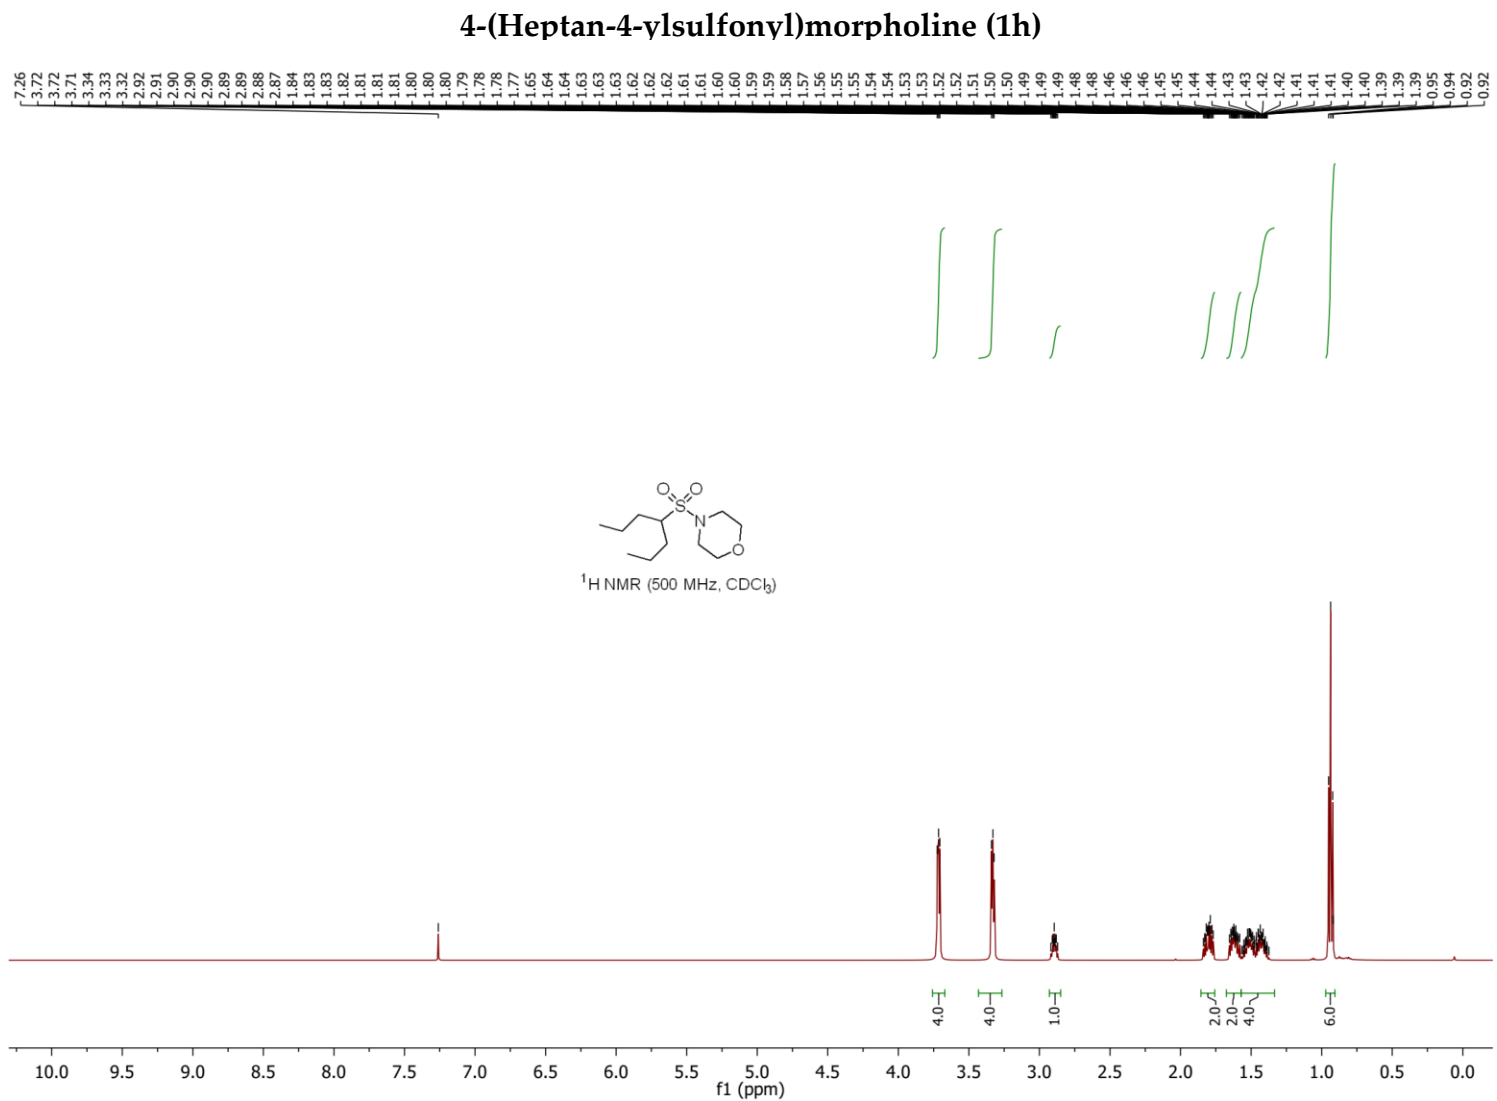

4-(Heptan-4-ylsulfonyl)morpholine (1h)

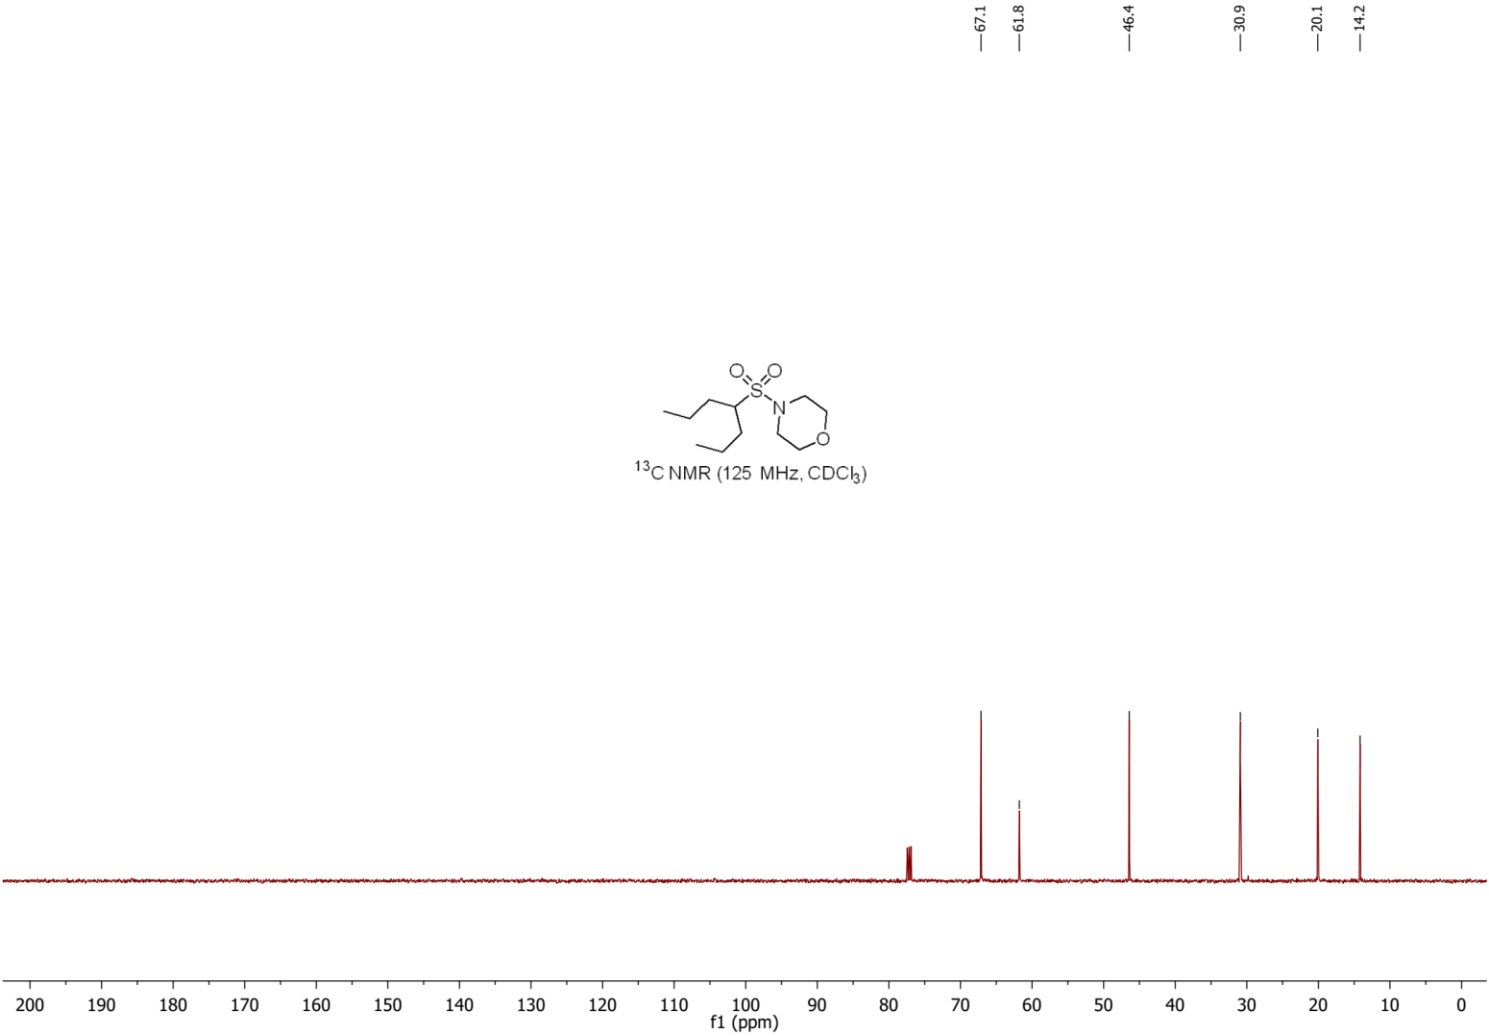

4-((2,3-Dihydro-1H-inden-2-yl)sulfonyl)morpholine (1i)

7.35  
7.33  
7.32  
7.30  
7.28  
7.26  
7.24  
7.23  
7.22  
7.21  
7.20  
7.19  
7.15

4.03  
3.99  
3.98  
3.96  
3.65  
3.64  
3.63  
3.45  
3.43  
3.42  
3.40  
3.34  
3.32  
3.31  
3.29  
3.28  
3.27  
3.26

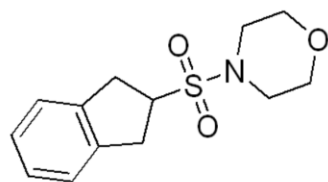

<sup>1</sup>H NMR (500 MHz, CDCl<sub>3</sub>)

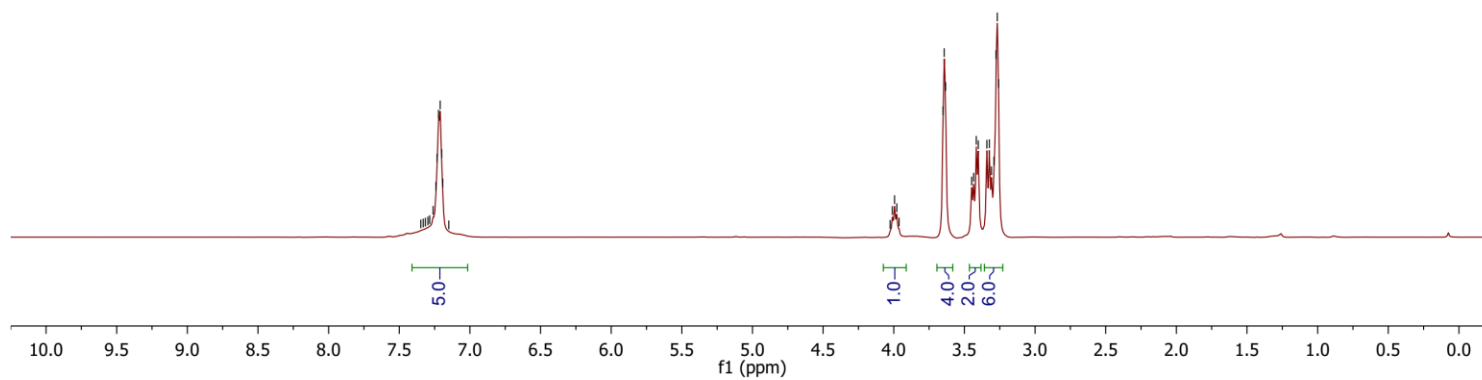

4-((2,3-Dihydro-1*H*-inden-2-yl)sulfonyl)morpholine (1i)

—139.8      —127.4  
             —124.5                      —66.9      —60.5      —46.4      —34.7

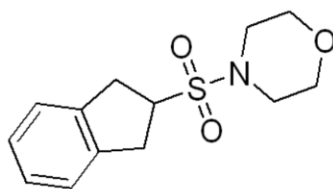

<sup>13</sup>C NMR (125 MHz, CDCl<sub>3</sub>)

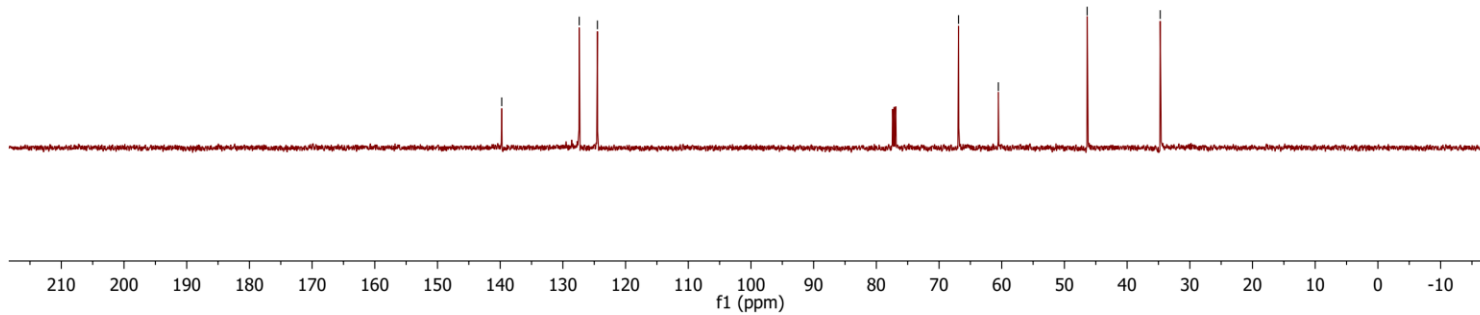

4-((4,4-Difluorocyclohexyl)sulfonyl)morpholine (1j)

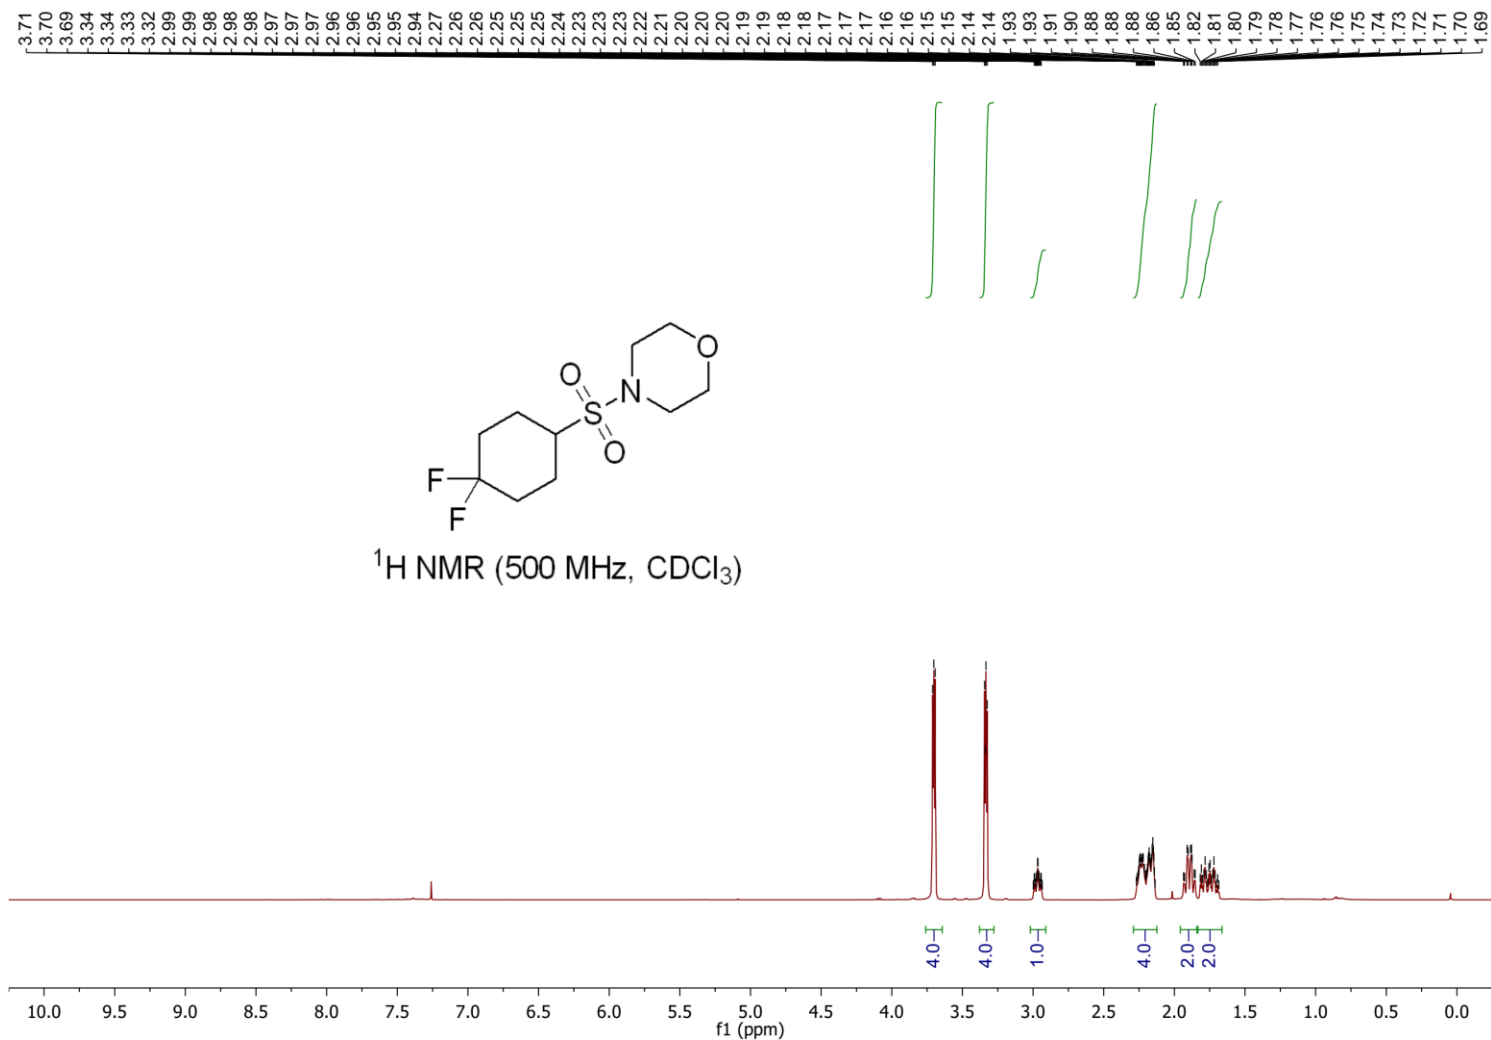

4-((4,4-Difluorocyclohexyl)sulfonyl)morpholine (1j)

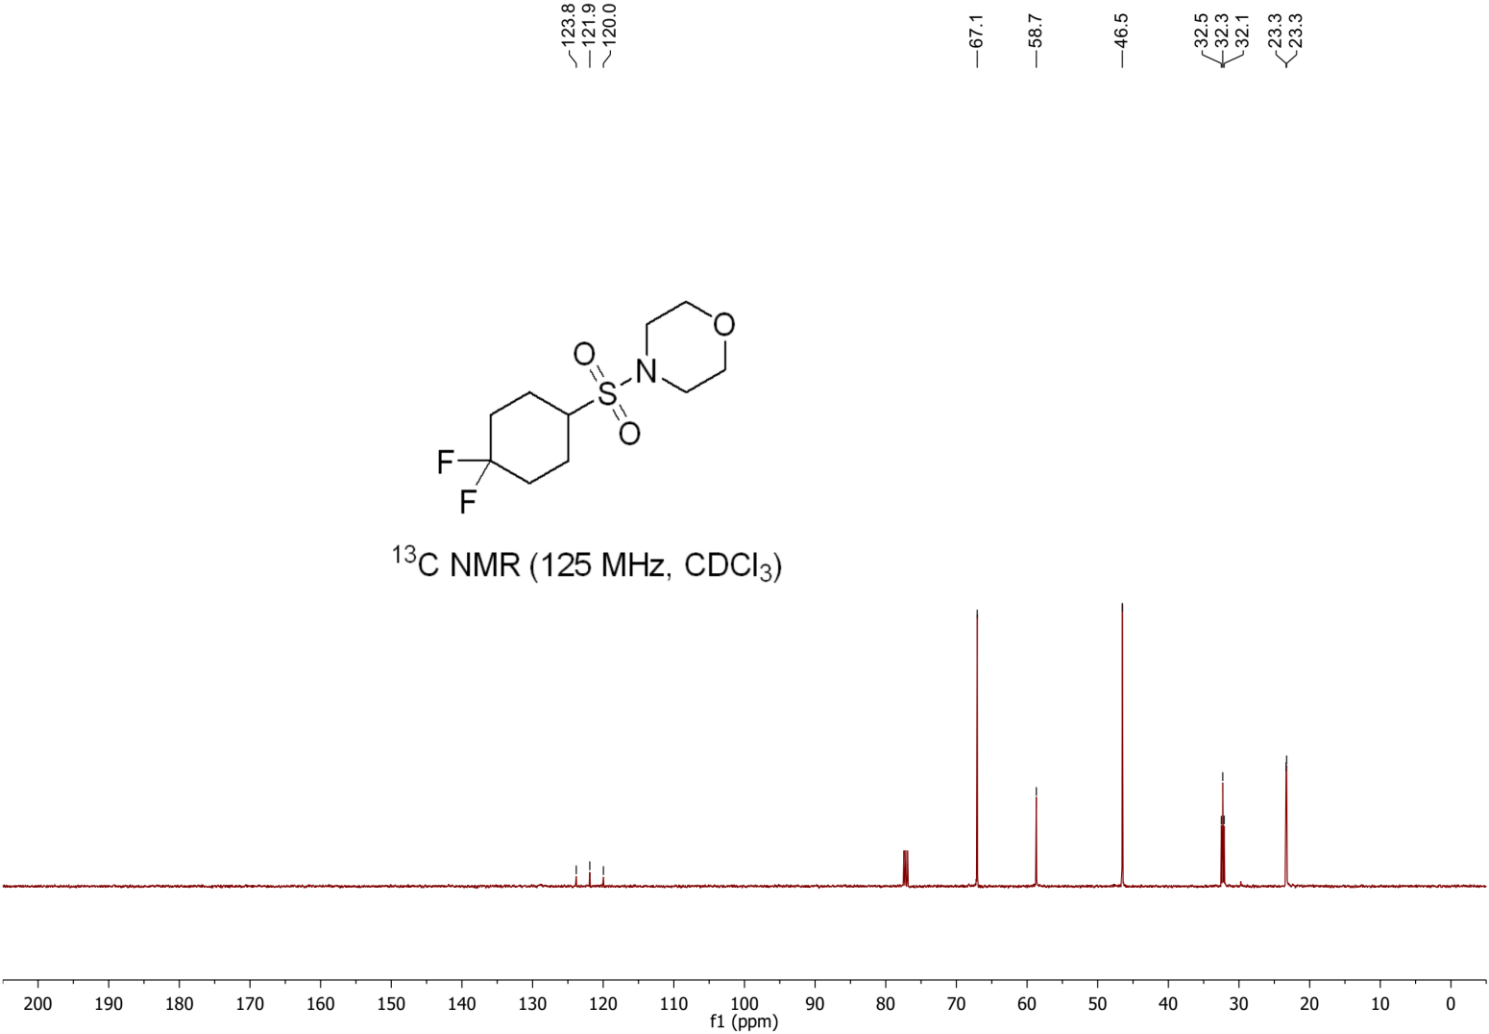

***tert*-Butyl 4-(morpholinosulfonyl)piperidine-1-carboxylate (1k)**

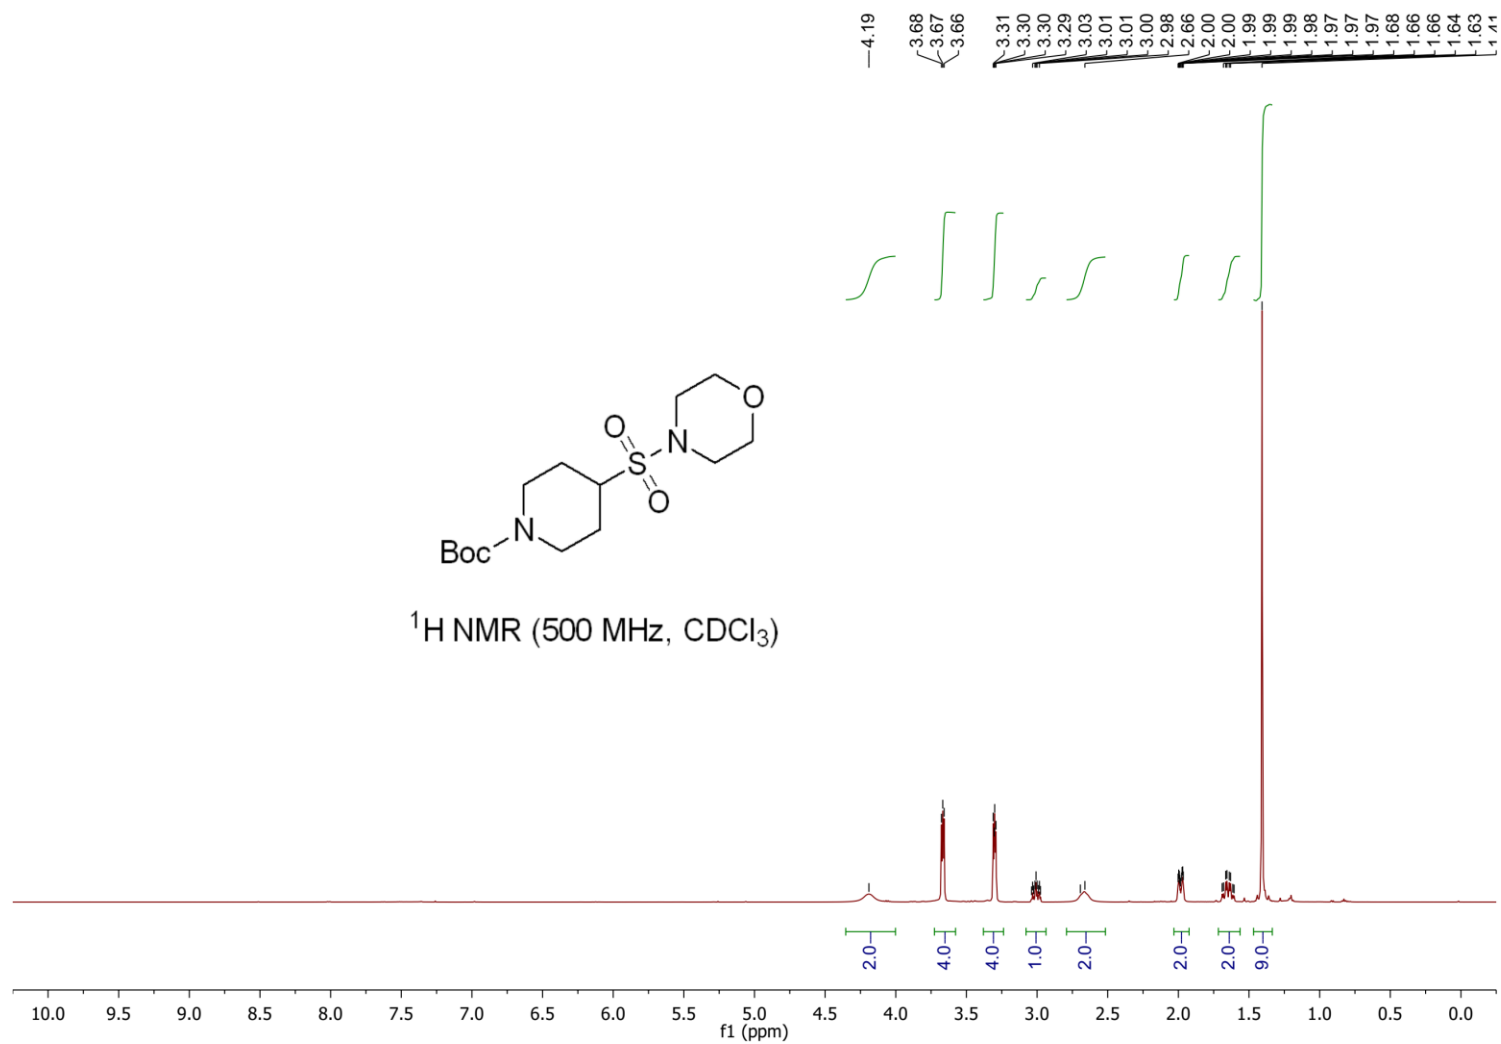



***tert*-Butyl 4-(morpholinosulfonyl)piperidine-1-carboxylate (1k)**

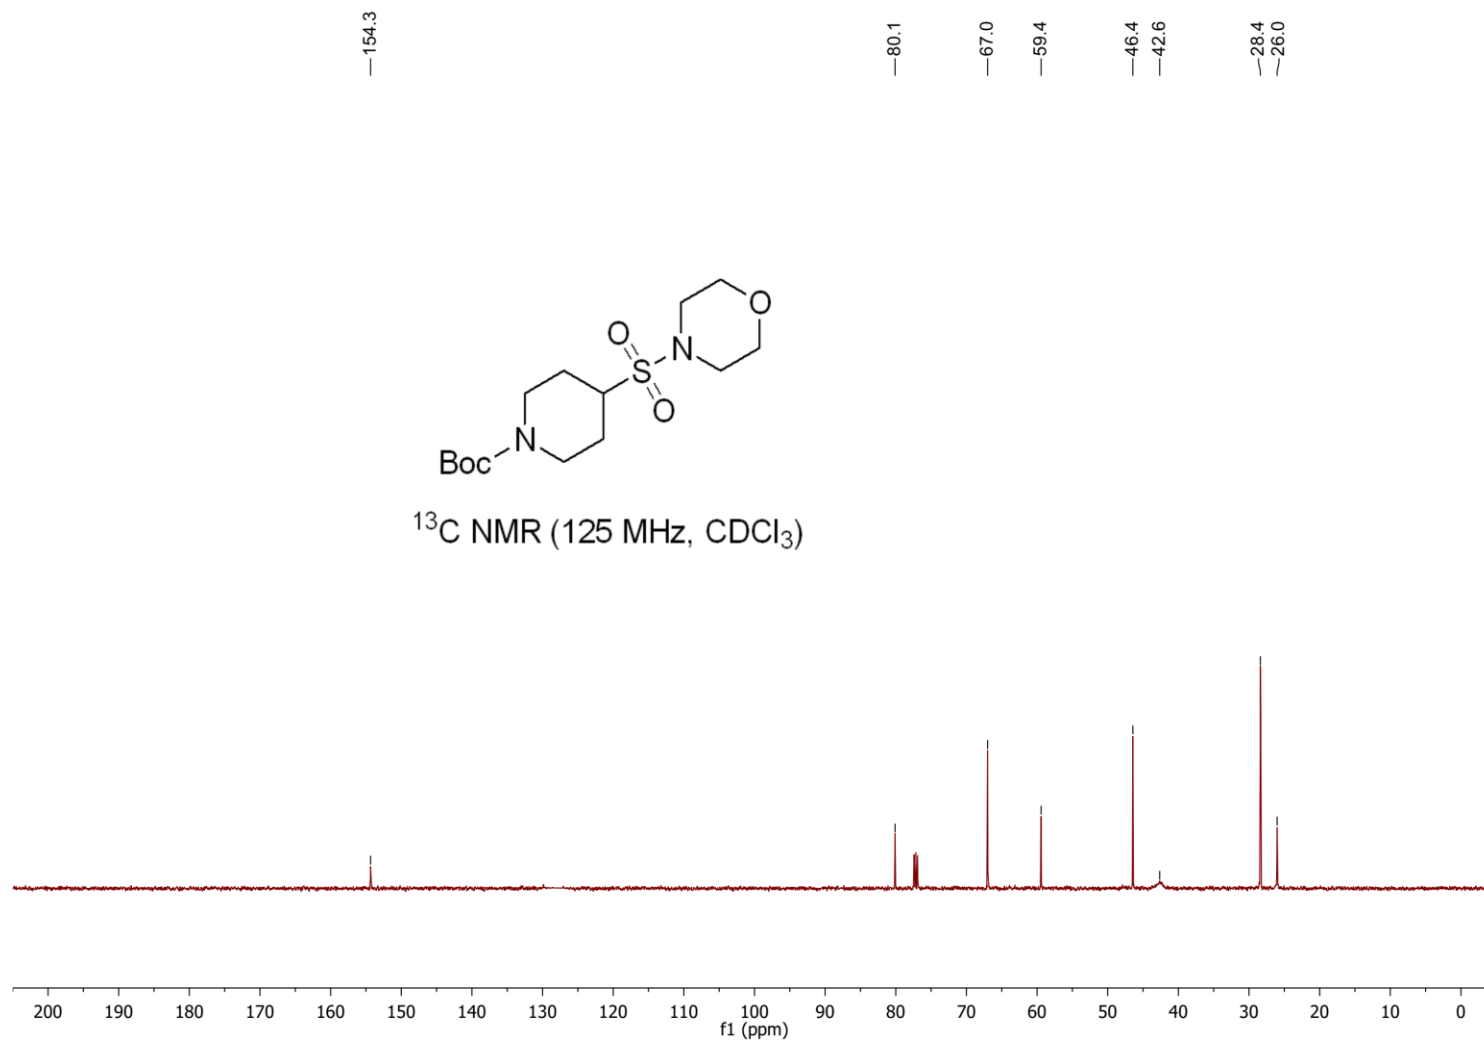

# 4-((Tetrahydro-2H-pyran-4-yl)sulfonyl)morpholine (11)

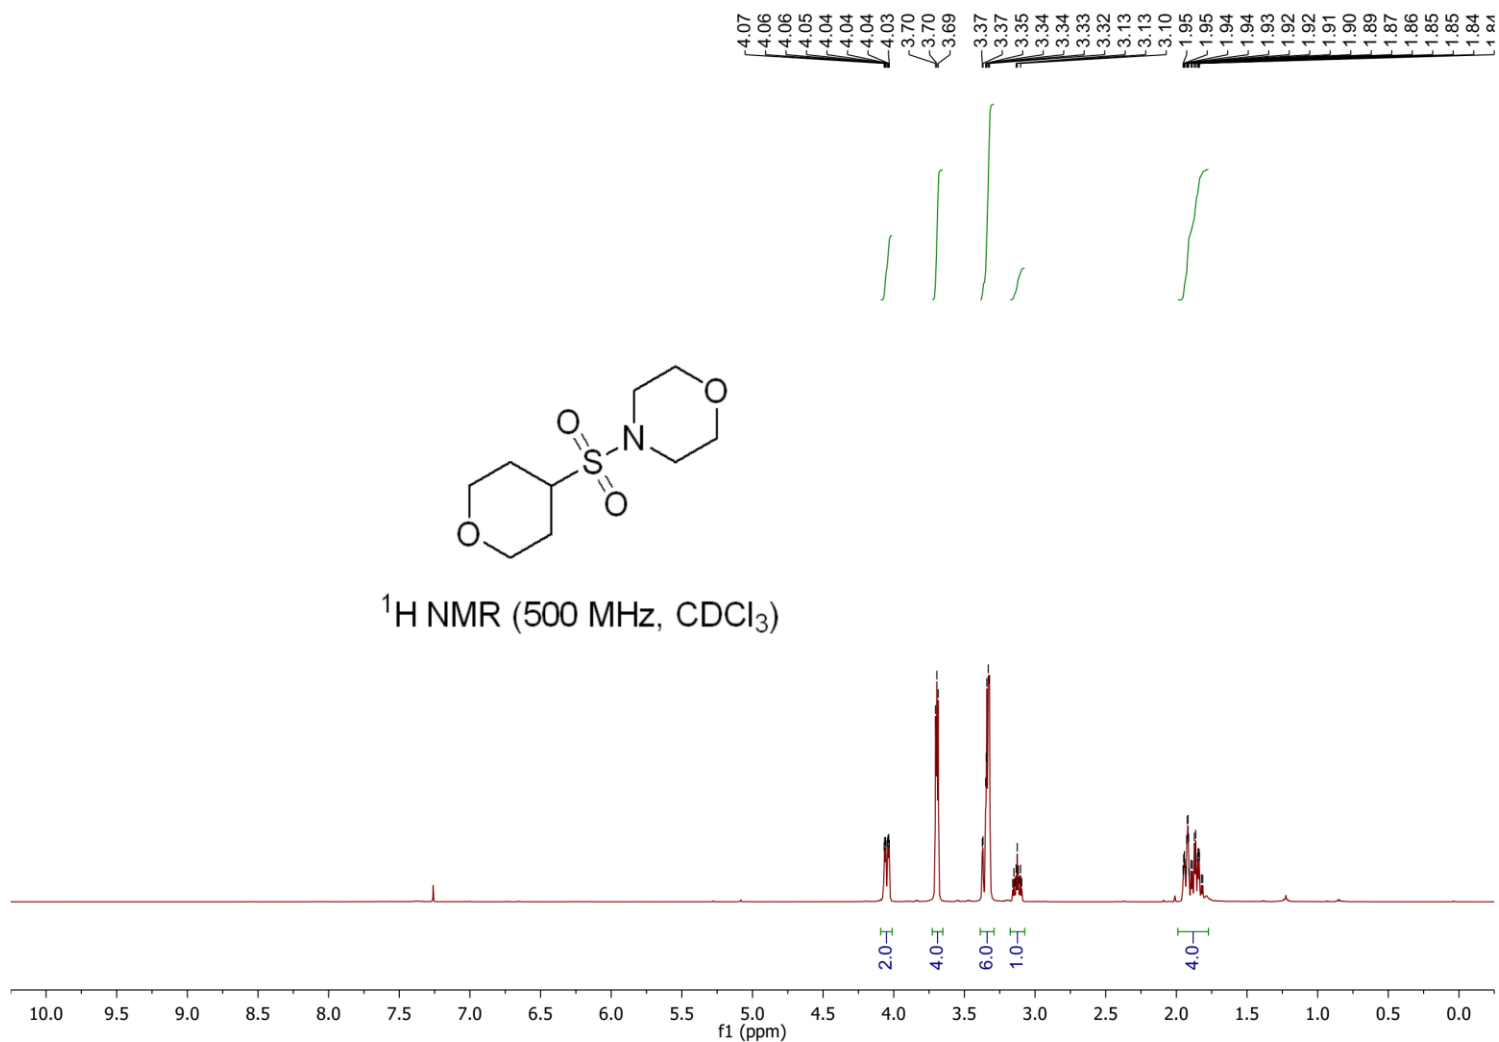

4-((Tetrahydro-2*H*-pyran-4-yl)sulfonyl)morpholine (11)

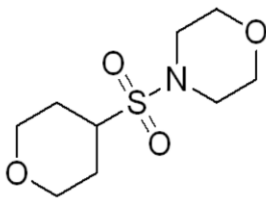

$^{13}\text{C}$  NMR (125 MHz,  $\text{CDCl}_3$ )

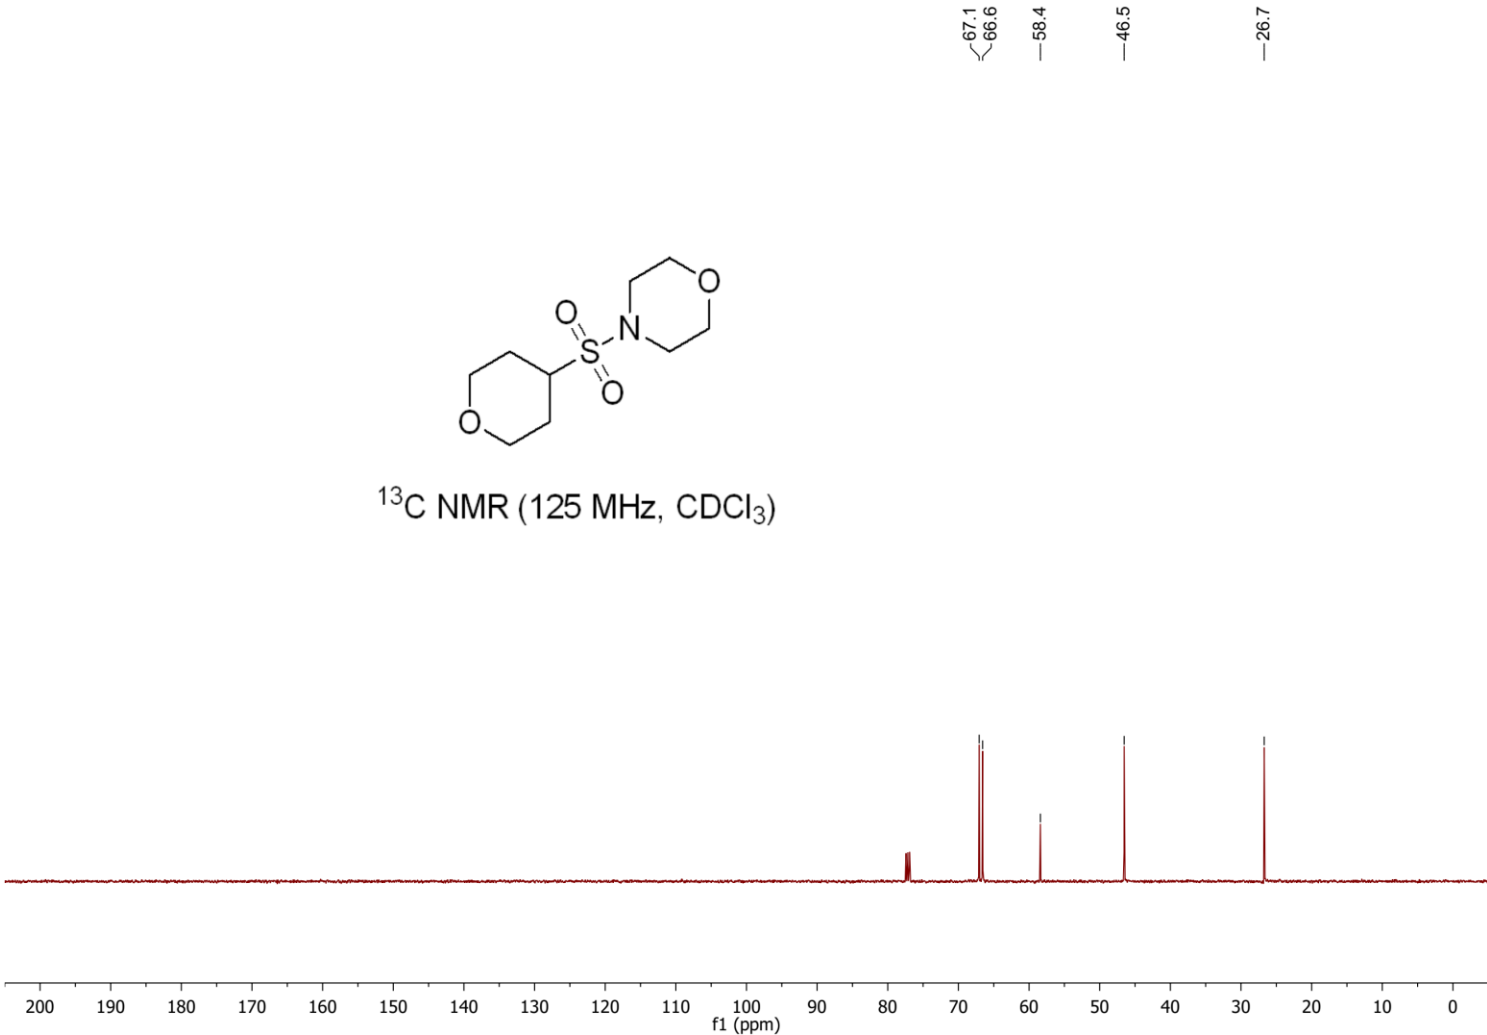

Methyl (1*S*,2*R*)-2-(morpholinosulfonyl)cyclohexane-1-carboxylate (1m)

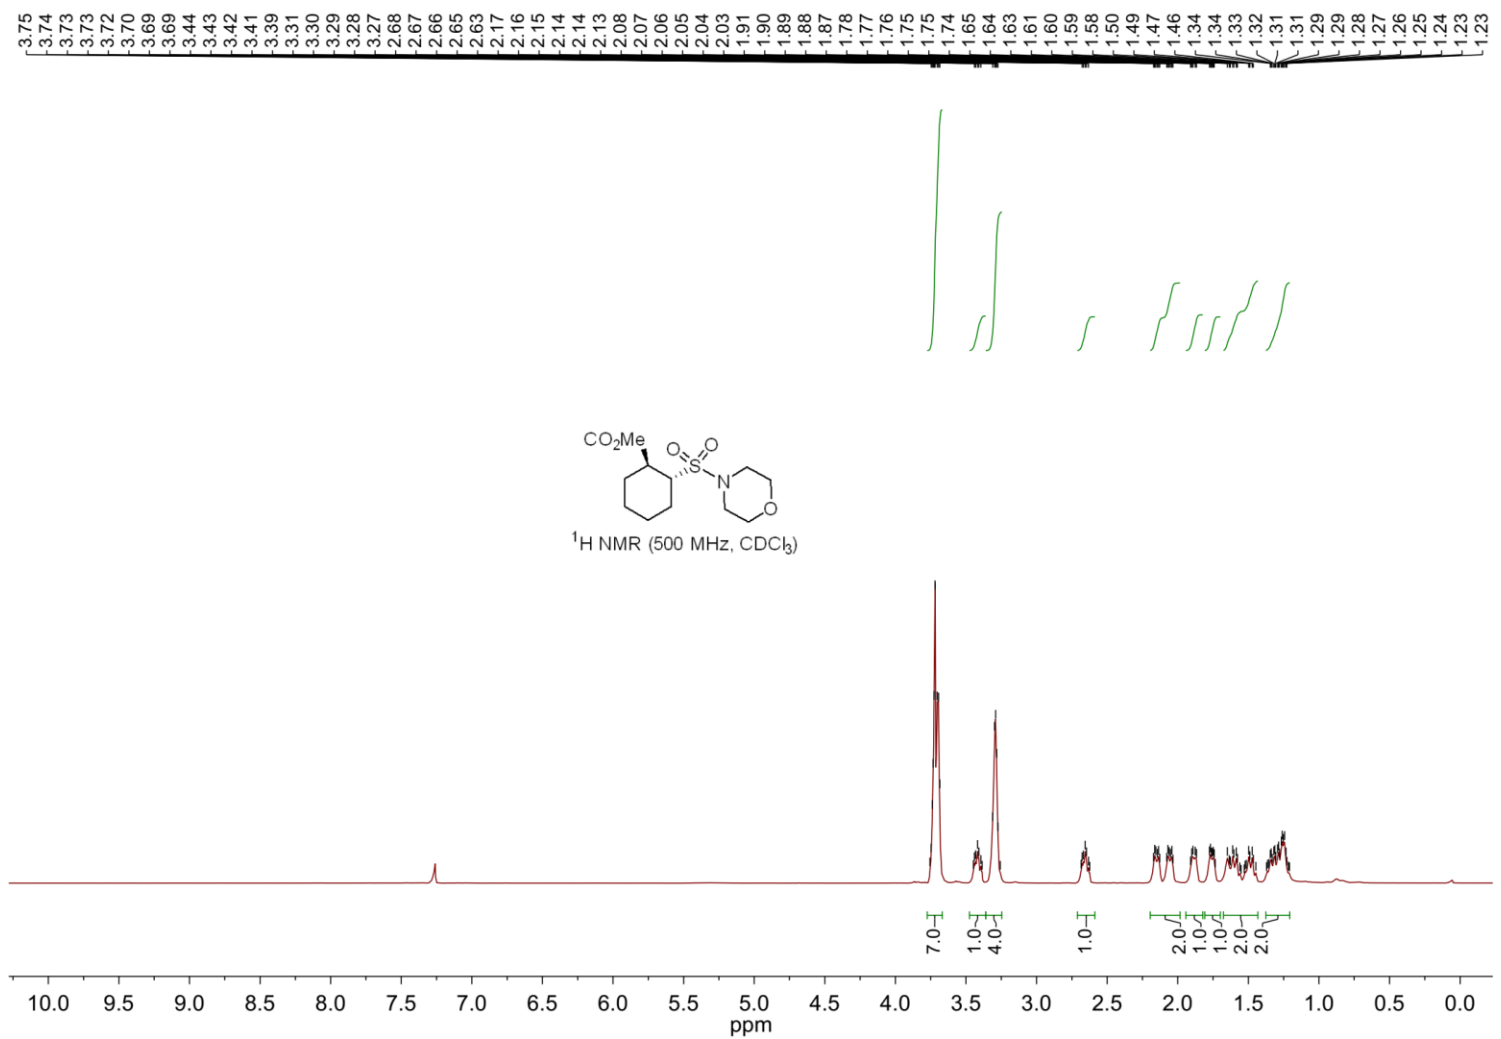

# Methyl (1*S*,2*R*)-2-(morpholinosulfonyl)cyclohexane-1-carboxylate (1m)

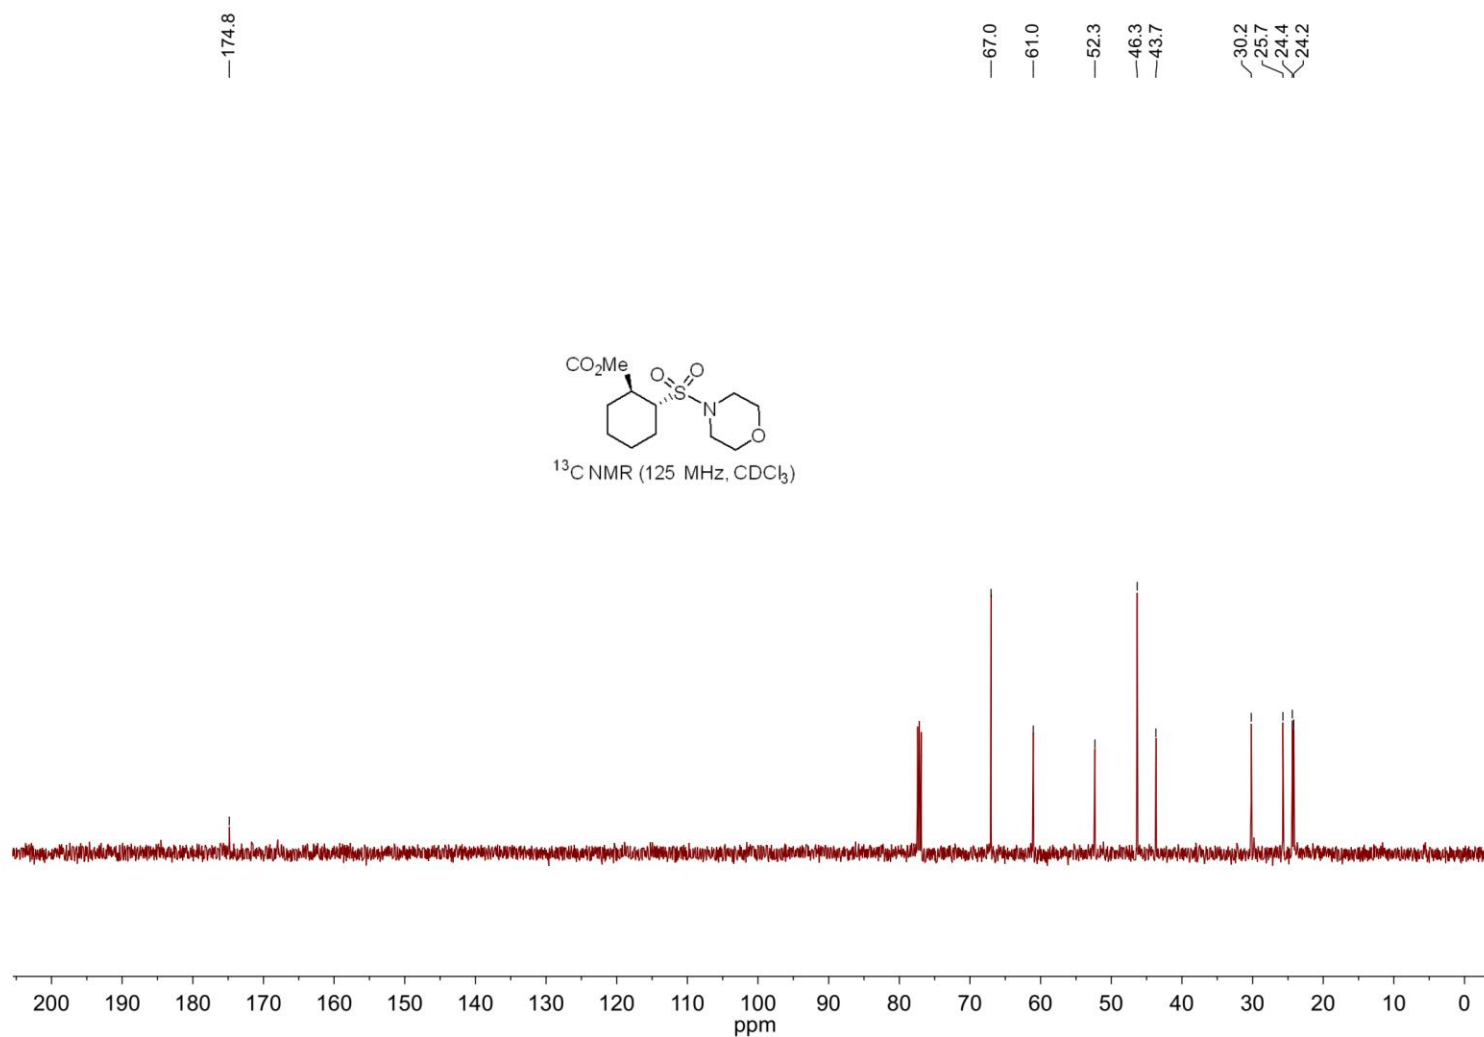

# Ethyl (1R,2S,4S)-3-(morpholinosulfonyl)bicyclo[2.2.1]heptane-2-carboxylate (1n)

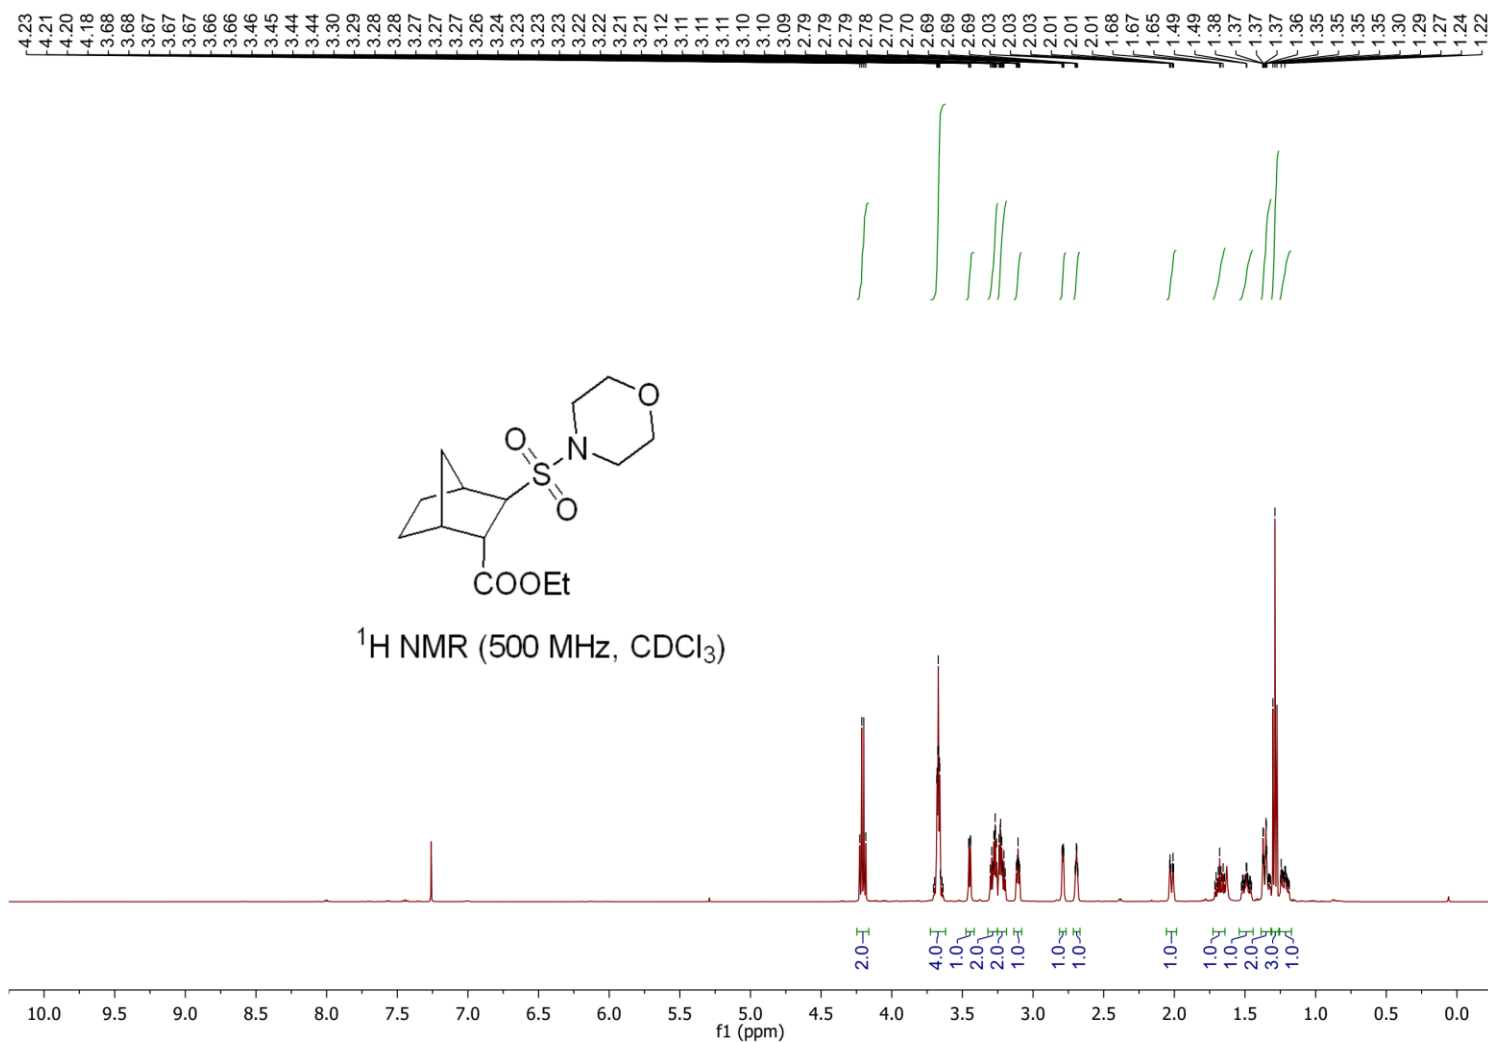

# Ethyl (1*R*,2*S*,4*S*)-3-(morpholinosulfonyl)bicyclo[2.2.1]heptane-2-carboxylate (1n)

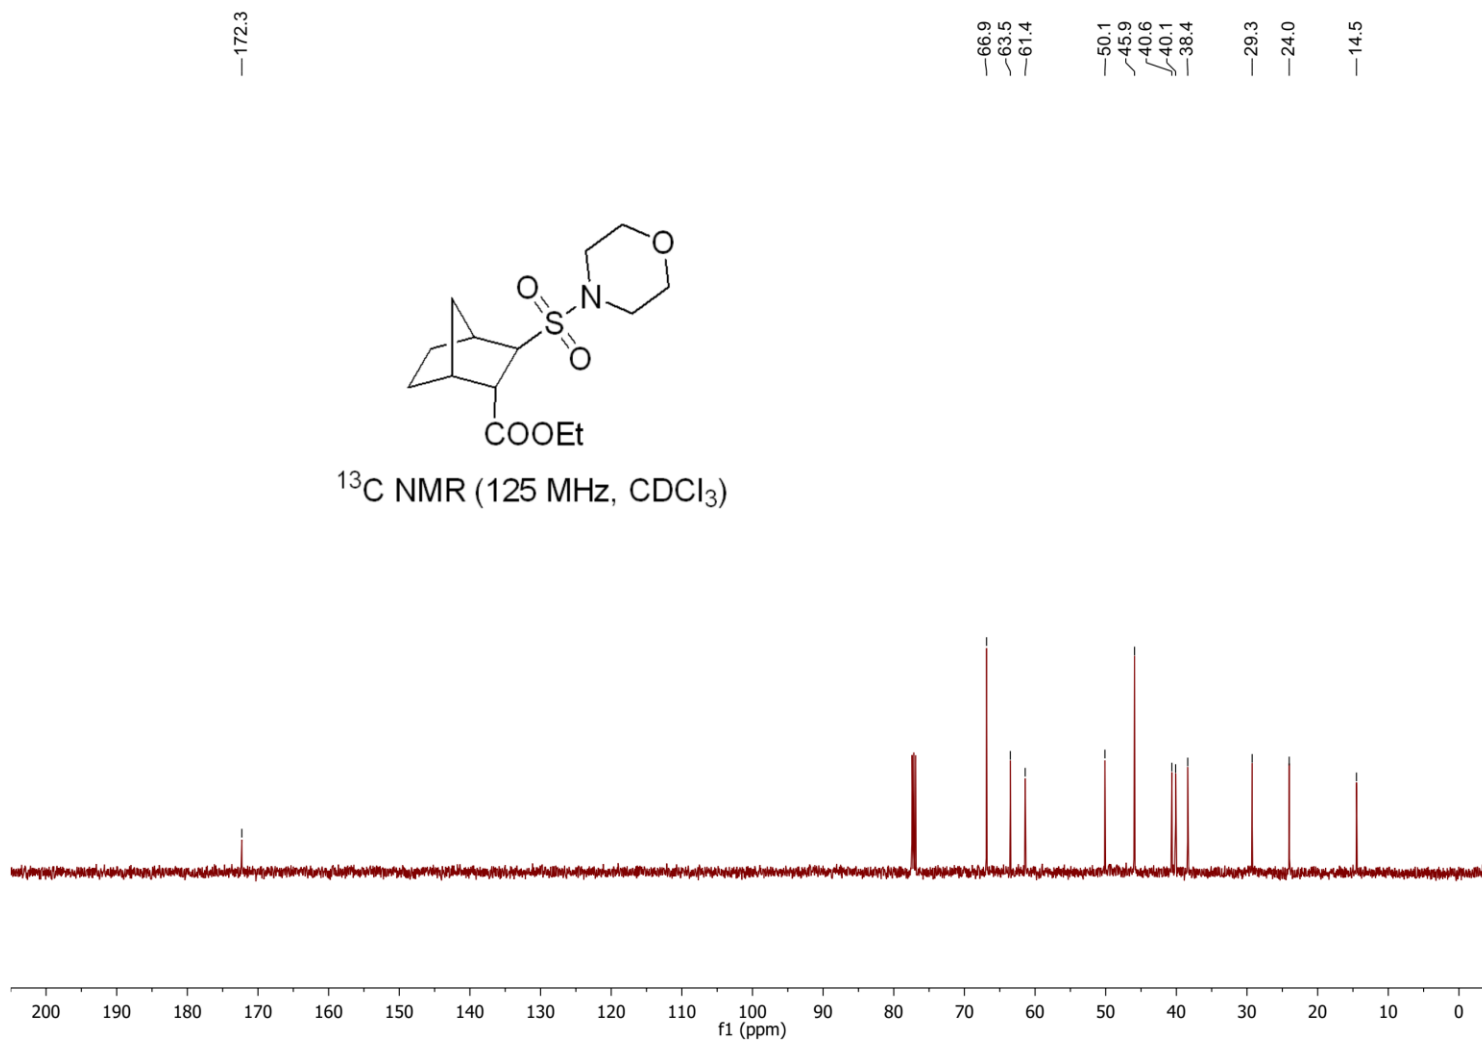

4-((1-Phenylcyclopropyl)sulfonyl)morpholine (1o)

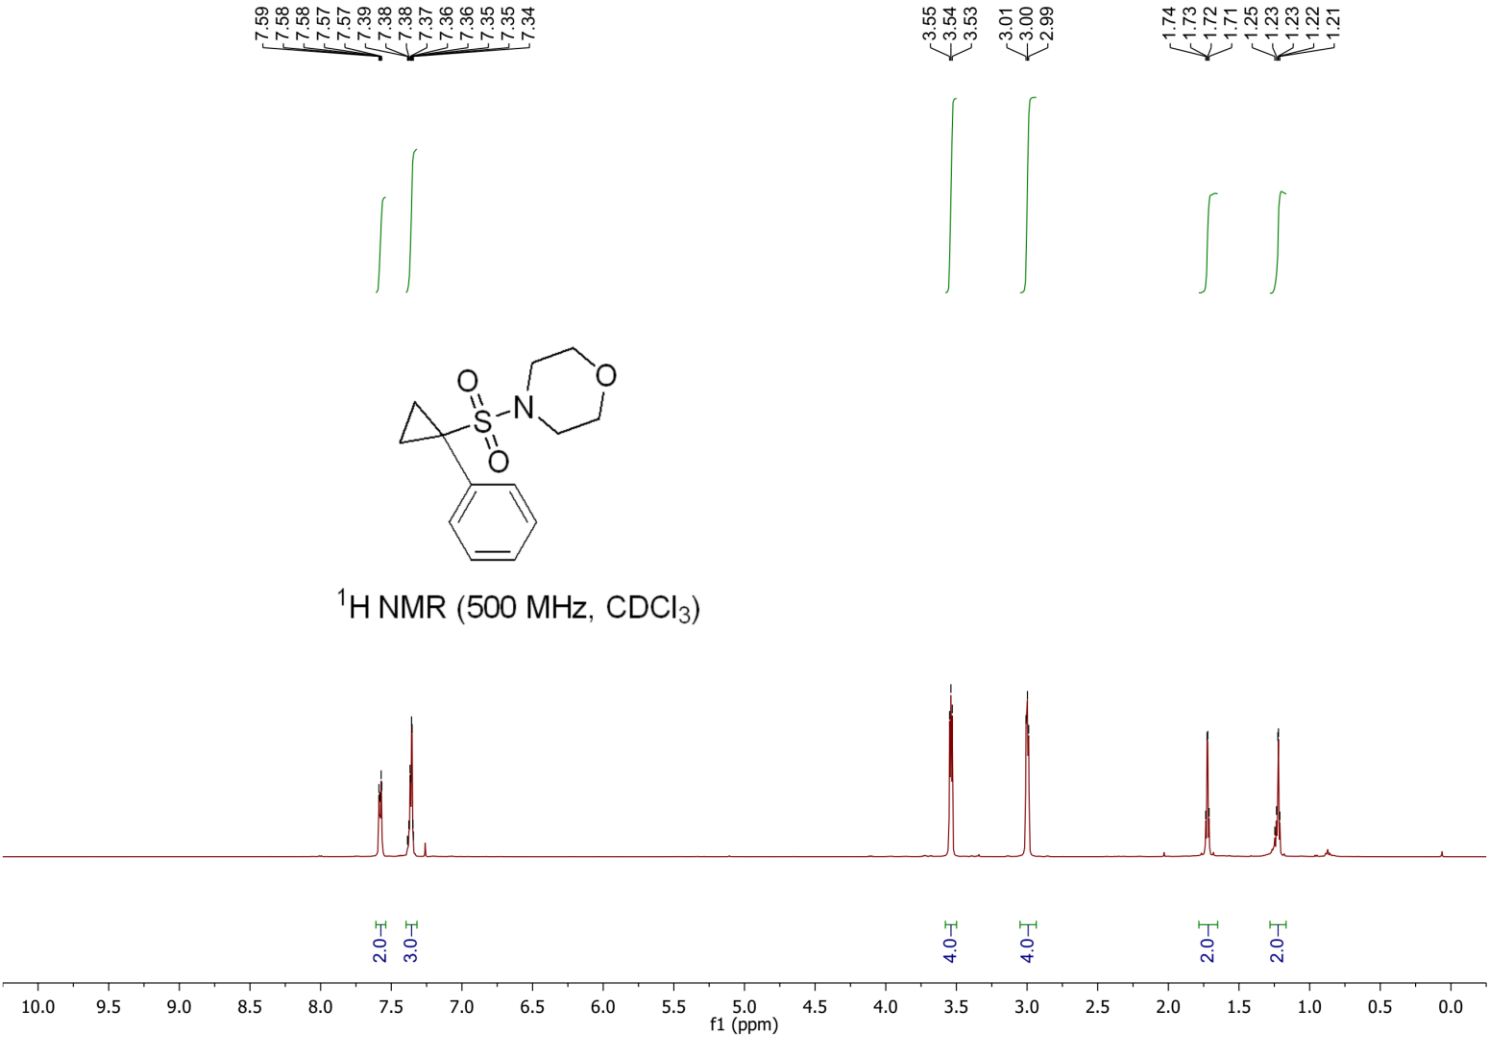



4-((1-Phenylcyclopropyl)sulfonyl)morpholine (1o)

134.6  
132.0  
129.2  
128.6

66.9

46.5  
44.3

12.4

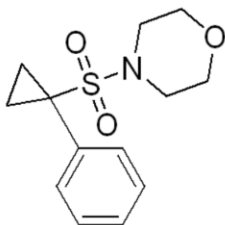

<sup>13</sup>C NMR (125 MHz, CDCl<sub>3</sub>)

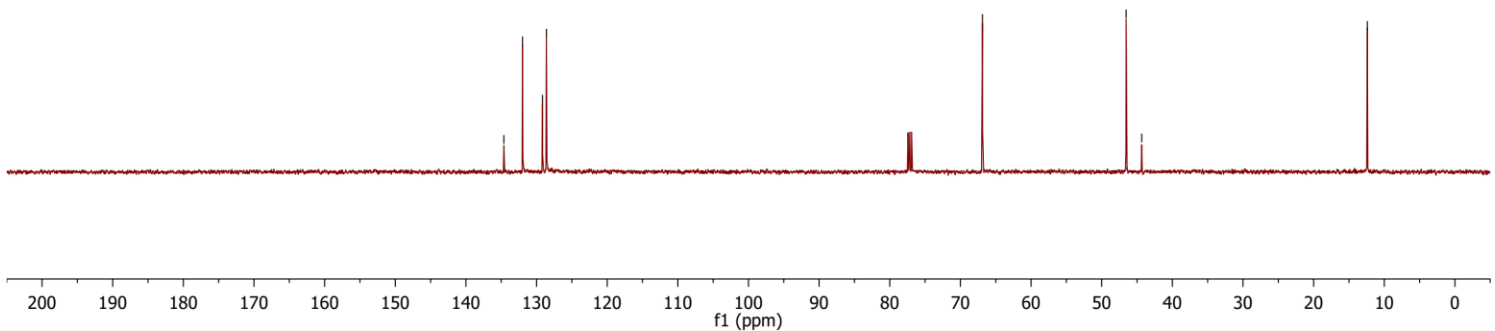

# 4-((4-Methyltetrahydro-2H-pyran-4-yl)sulfonyl)morpholine (1p)

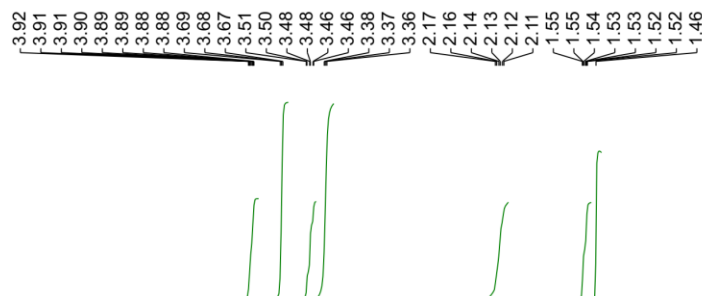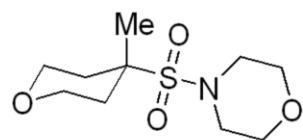

<sup>1</sup>H NMR (500 MHz, CDCl<sub>3</sub>)

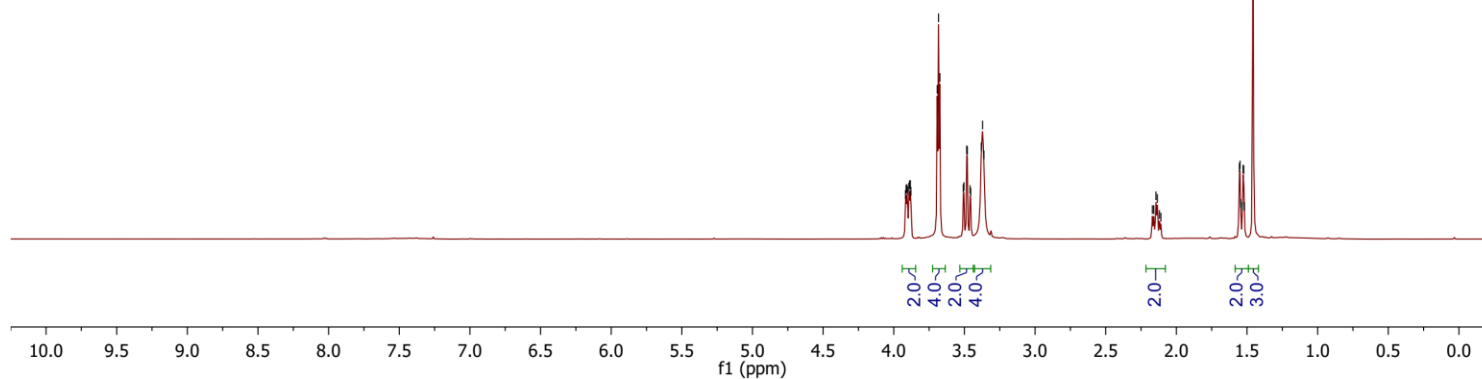

4-((4-Methyltetrahydro-2H-pyran-4-yl)sulfonyl)morpholine (1p)

67.3  
63.2  
62.2  
47.9  
31.2  
17.4

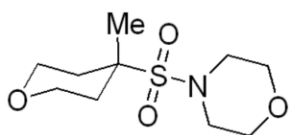

$^{13}\text{C}$  NMR (125 MHz,  $\text{CDCl}_3$ )

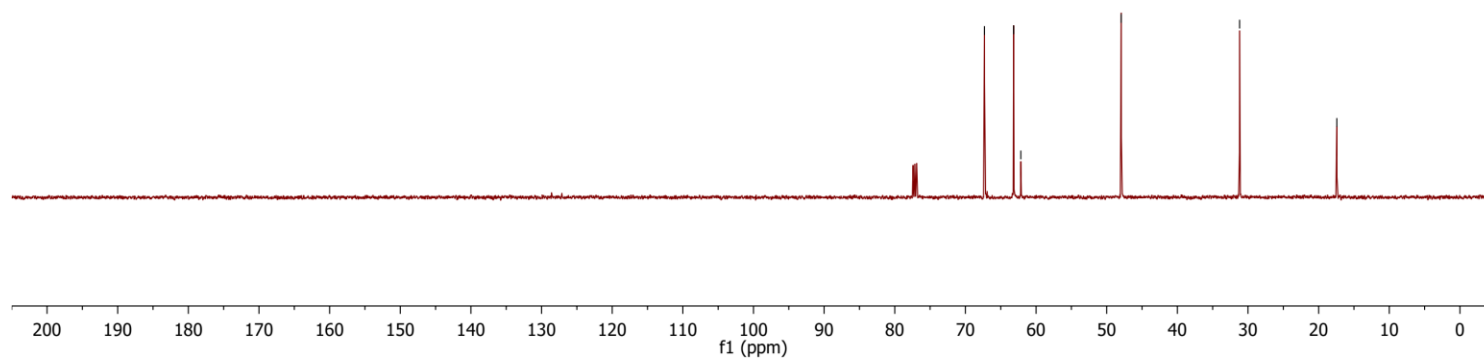

# 1-Phenyl-4-(piperidin-1-ylsulfonyl)butan-1-one (2a)

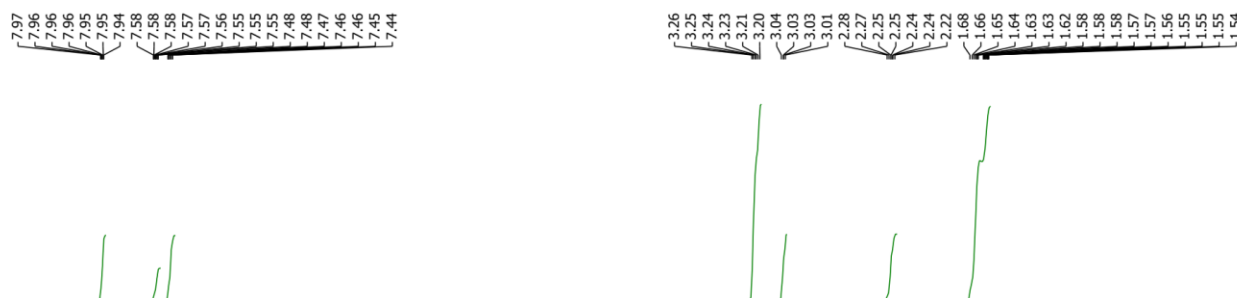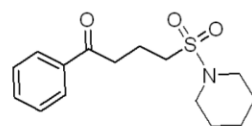

<sup>1</sup>H NMR (500 MHz, CDCl<sub>3</sub>)

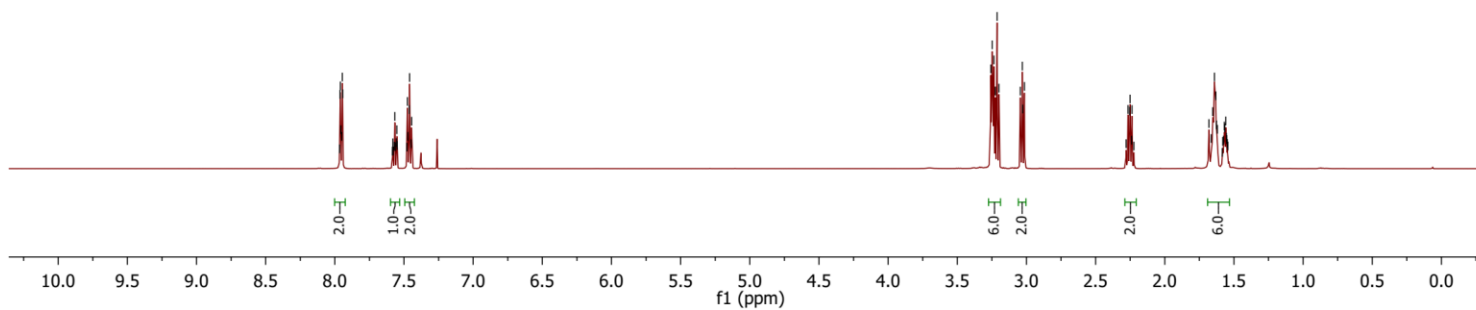

1-Phenyl-4-(piperidin-1-ylsulfonyl)butan-1-one (2a)

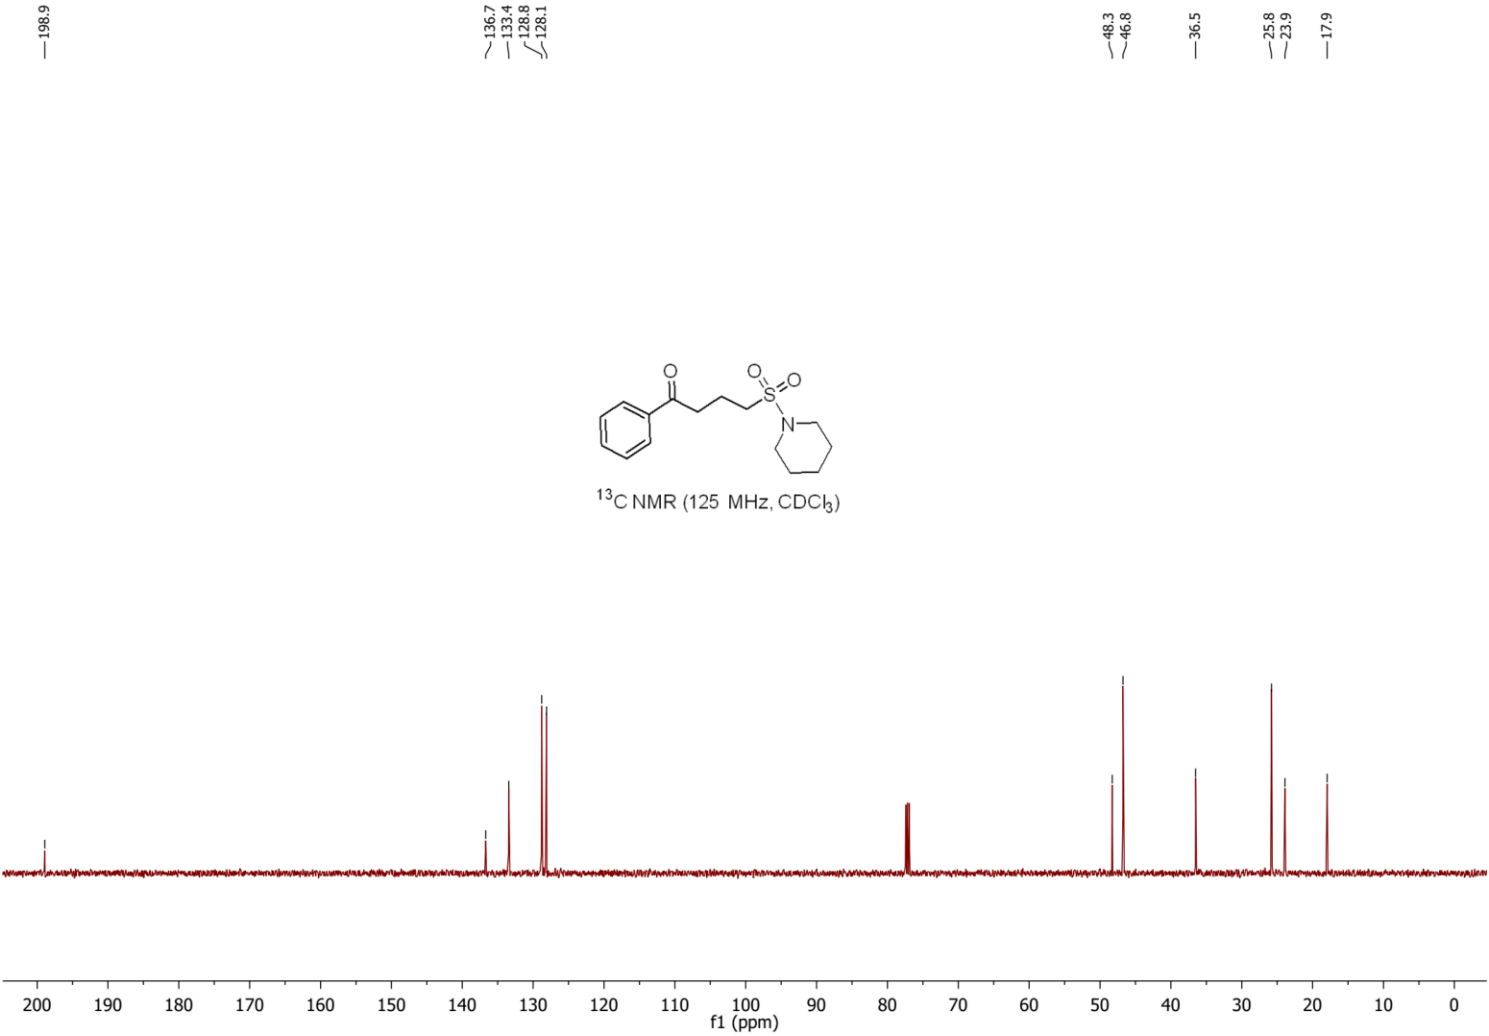

# 1-((Tetrahydro-2H-pyran-4-yl)sulfonyl)piperidine (2b)

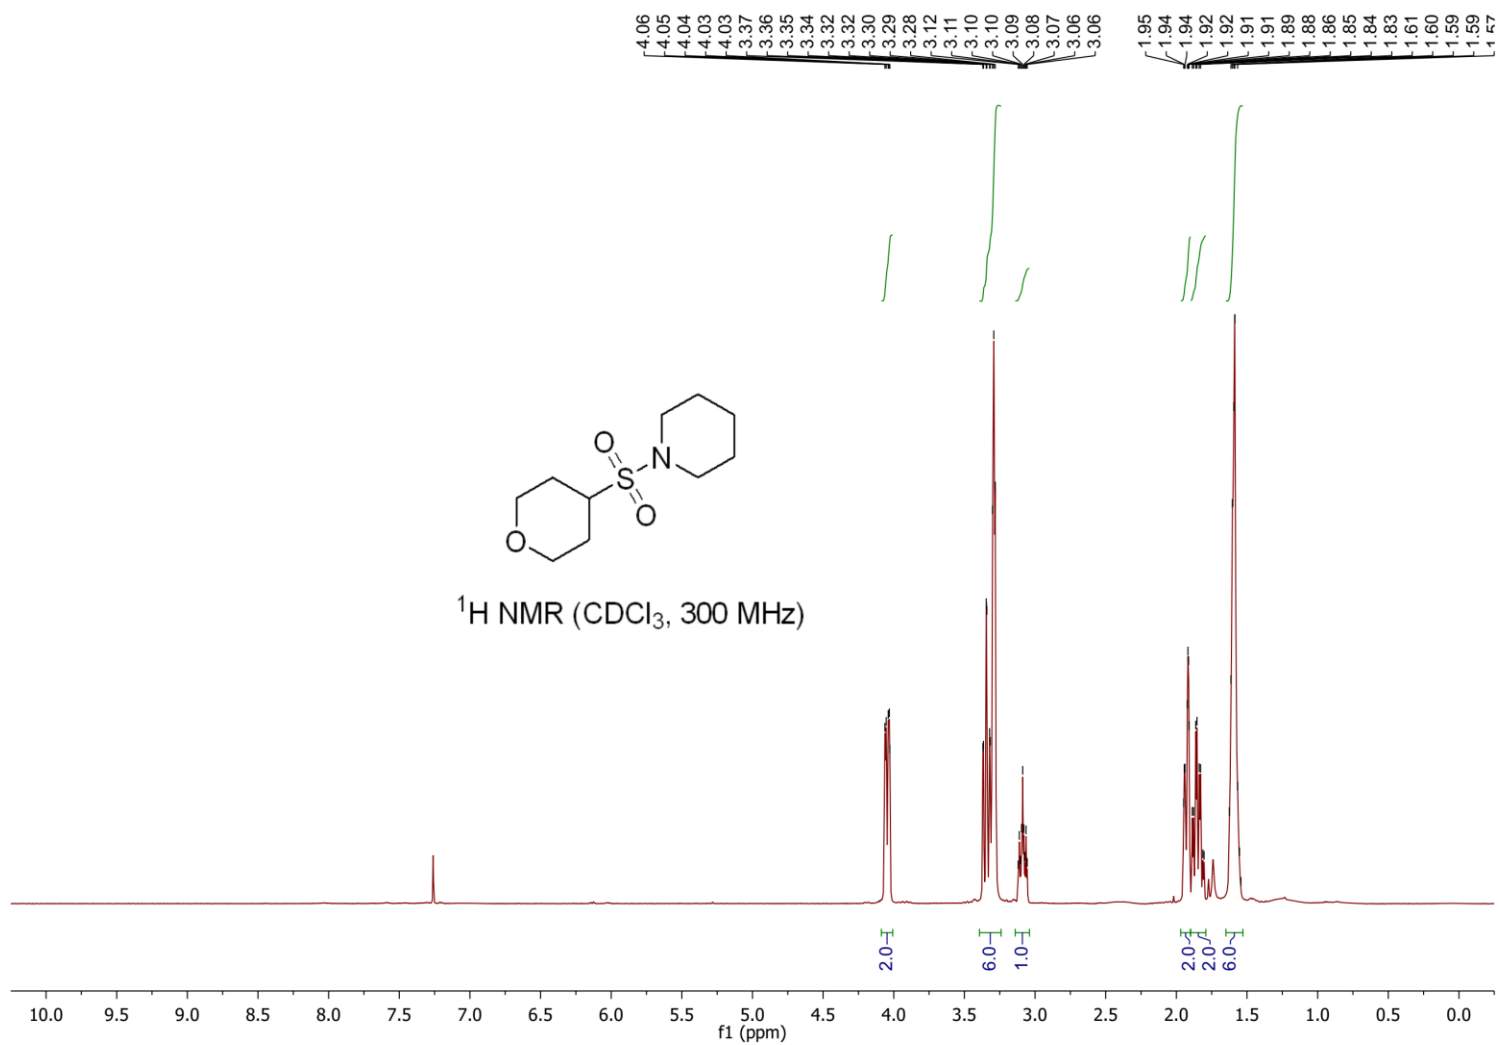

1-((Tetrahydro-2*H*-pyran-4-yl)sulfonyl)piperidine (2b)

66.8  
58.4  
47.4  
26.9  
26.3  
24.1

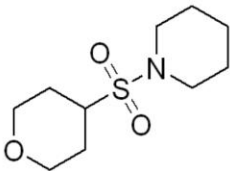

<sup>13</sup>C NMR (CDCl<sub>3</sub>, 75 MHz)

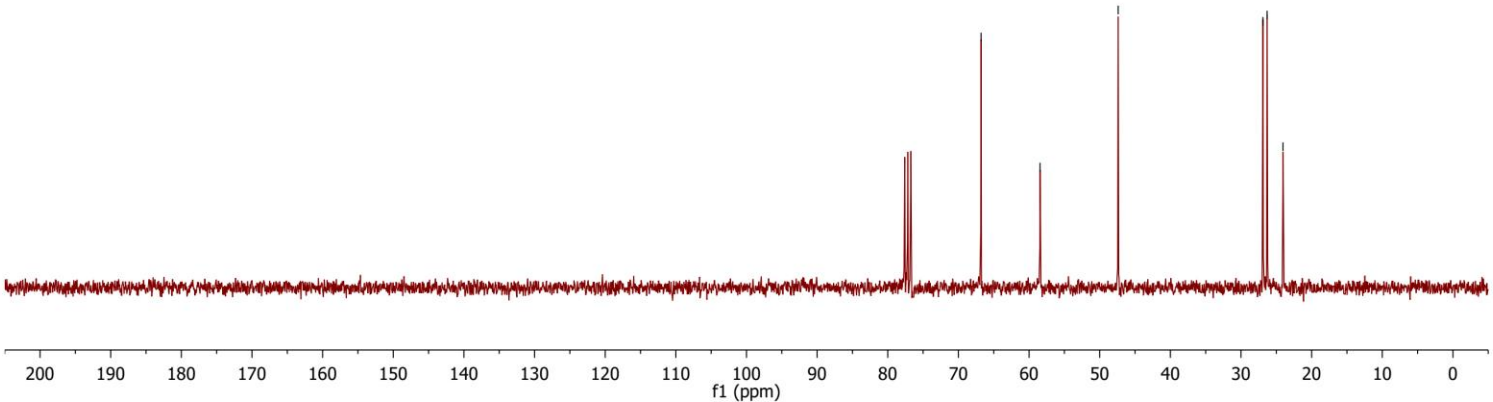

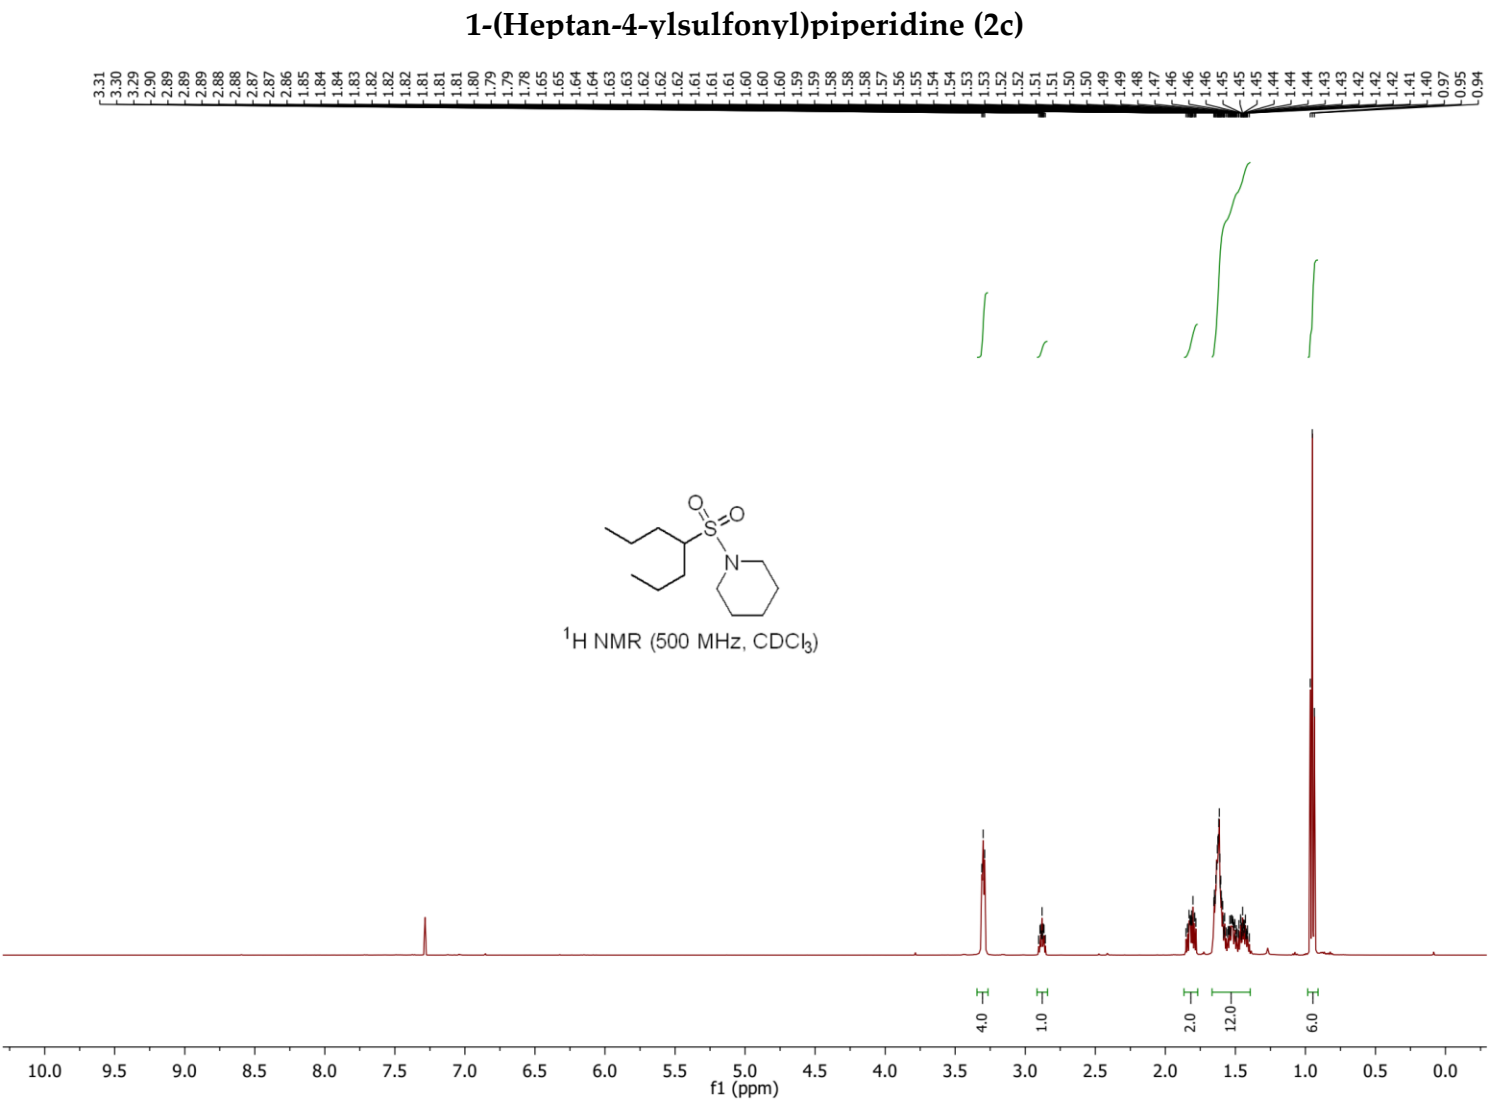



1-(Heptan-4-ylsulfonyl)piperidine (2c)

— 61.6 — 47.1 — 31.0 — 26.3 — 24.1 — 20.2 — 14.2

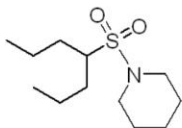

<sup>13</sup>C NMR (125 MHz, CDCl<sub>3</sub>)

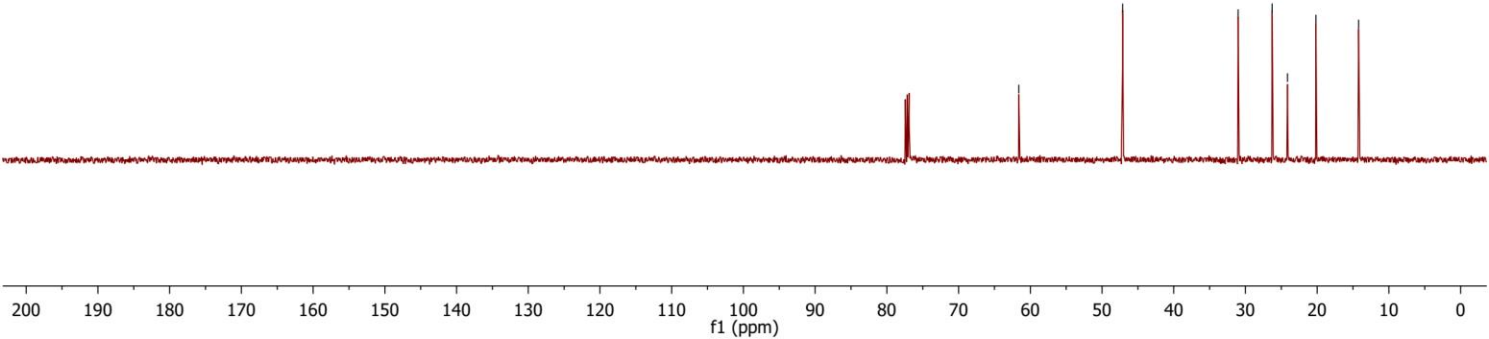

# Methyl (1*S*\*,2*R*\*)-2-(piperidin-1-ylsulfonyl)cyclohexane-1-carboxylate (2d)

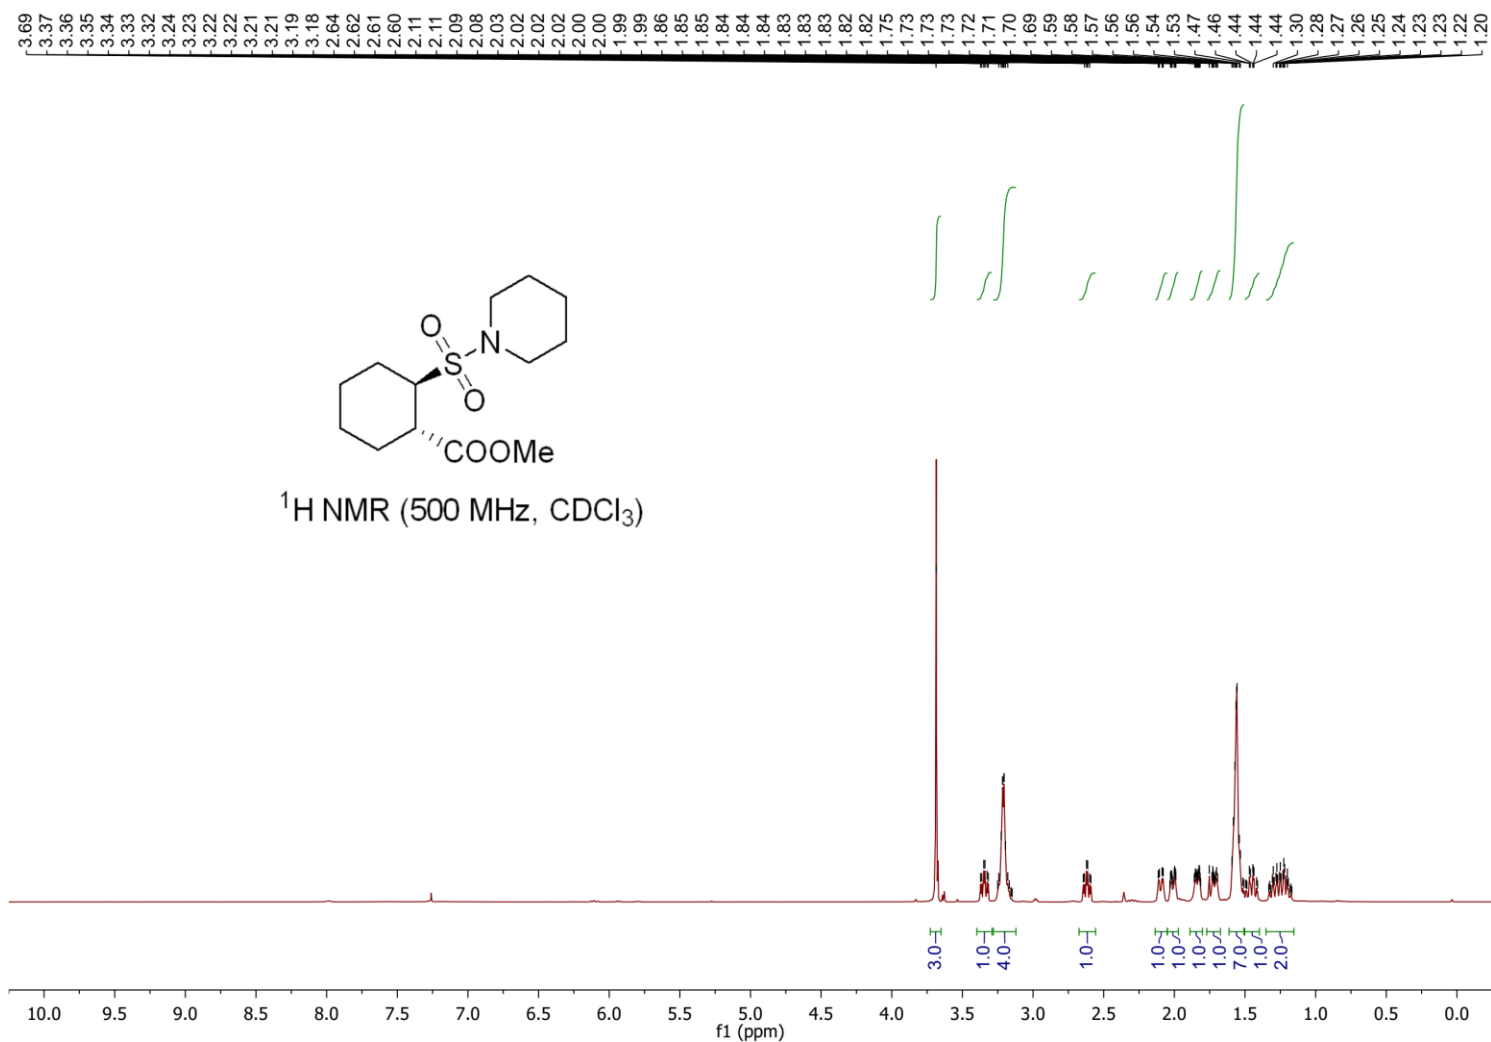

# Methyl (1*S*\*,2*R*\*)-2-(piperidin-1-ylsulfonyl)cyclohexane-1-carboxylate (2d)

—174.9

—60.9

~52.2

~47.0

~43.7

30.1

26.1

25.7

24.4

24.2

24.0

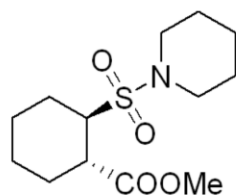

<sup>13</sup>C NMR (125 MHz, CDCl<sub>3</sub>)

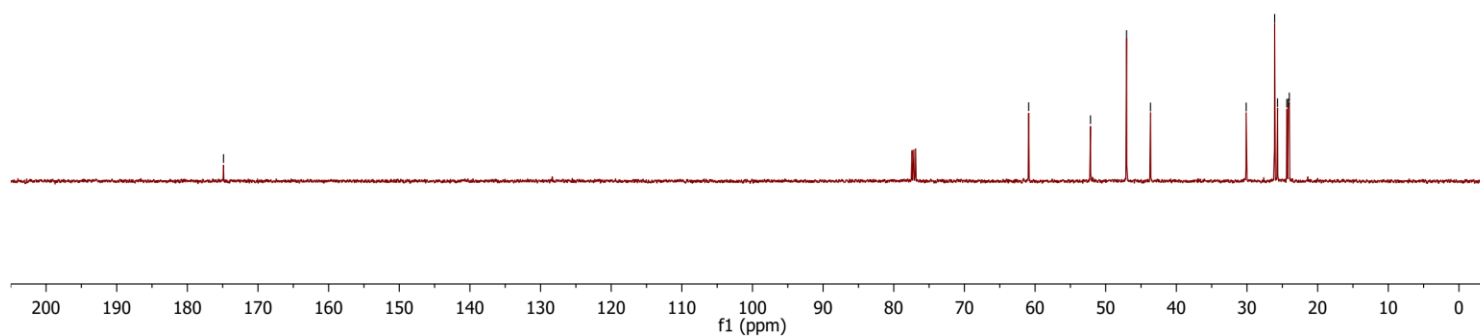

1-(((3*s*,5*s*,7*s*)-Adamantan-1-yl)sulfonyl)piperidine (2e)

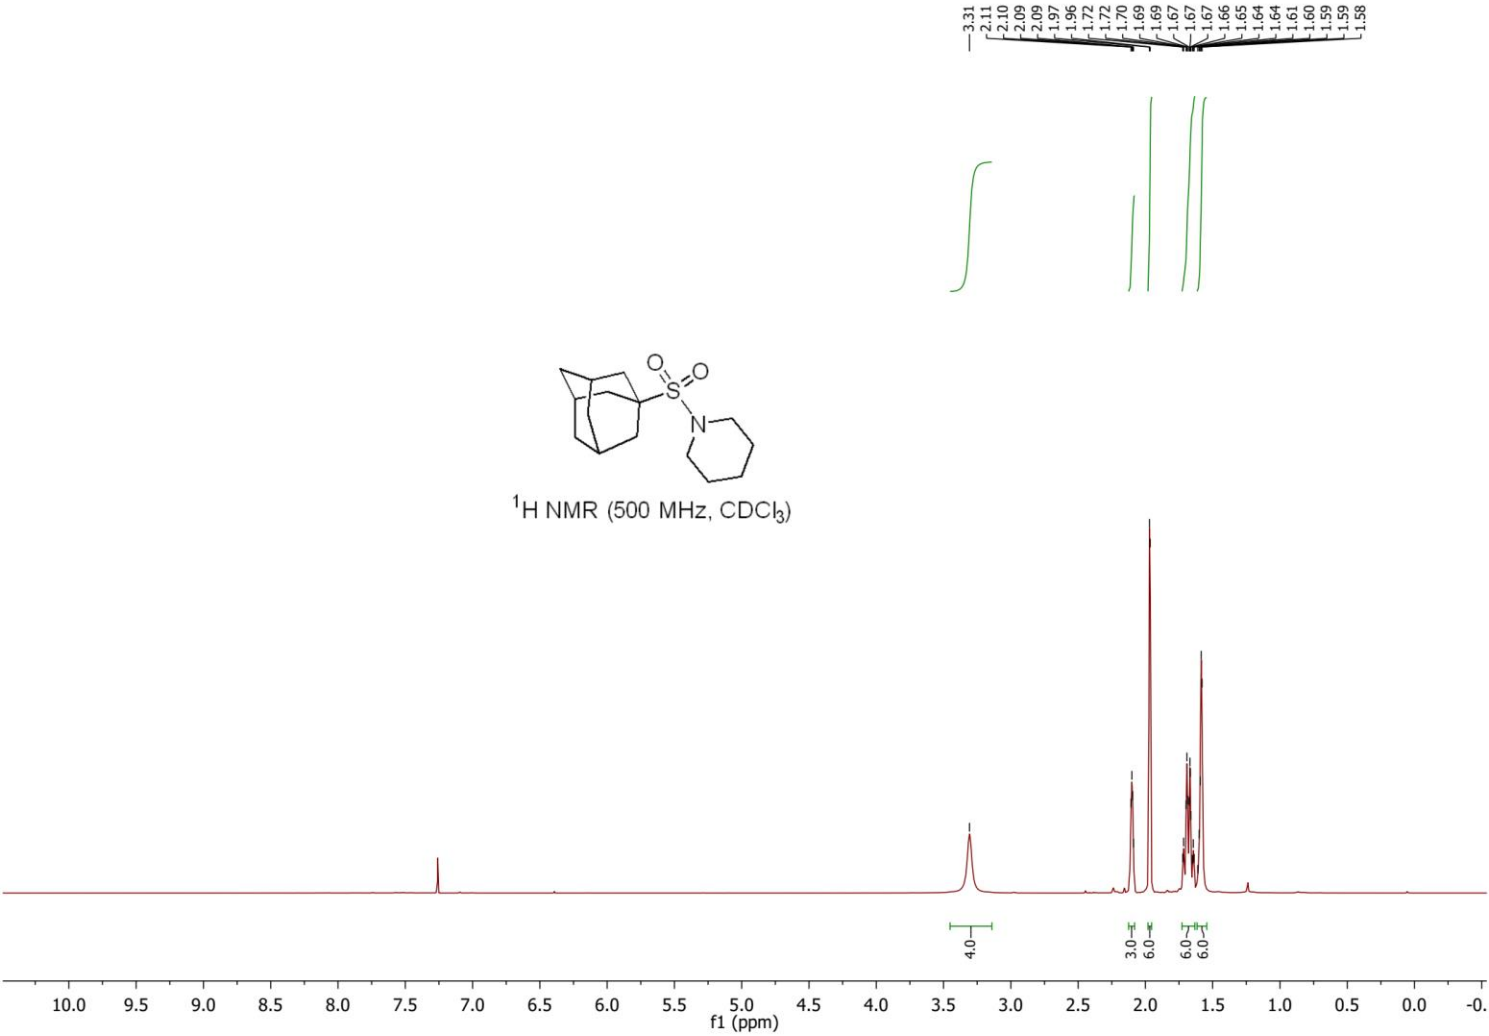

1-(((3*s*,5*s*,7*s*)-Adamantan-1-yl)sulfonyl)piperidine (2e)

— 62.4 — 48.3  
36.1 36.0 28.2 26.5 24.0

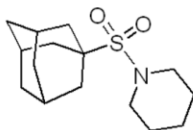

<sup>13</sup>C NMR (125 MHz, CDCl<sub>3</sub>)

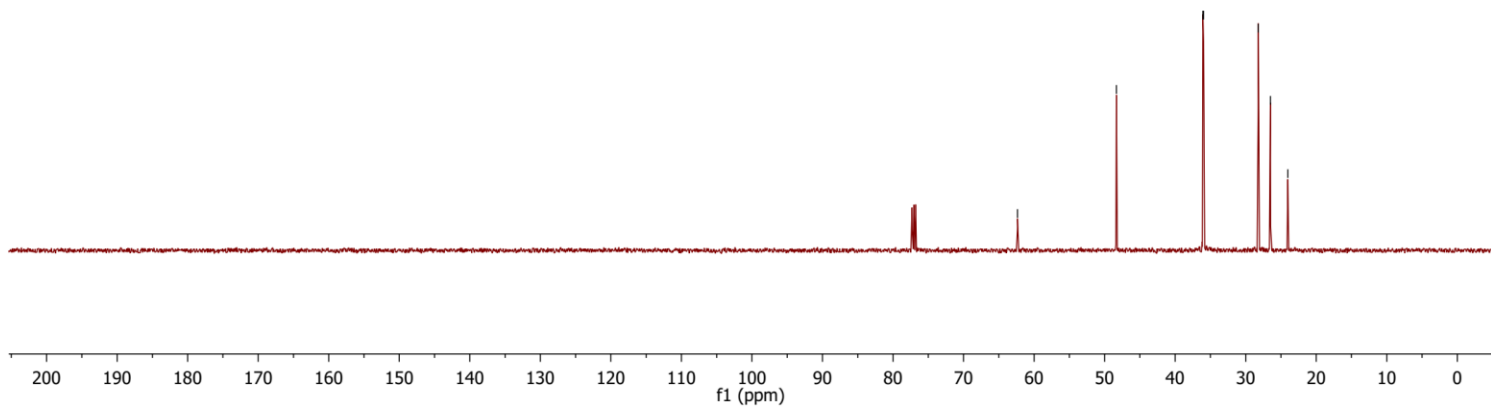

# 1-(*tert*-Pentylsulfonyl)piperidine (2f)

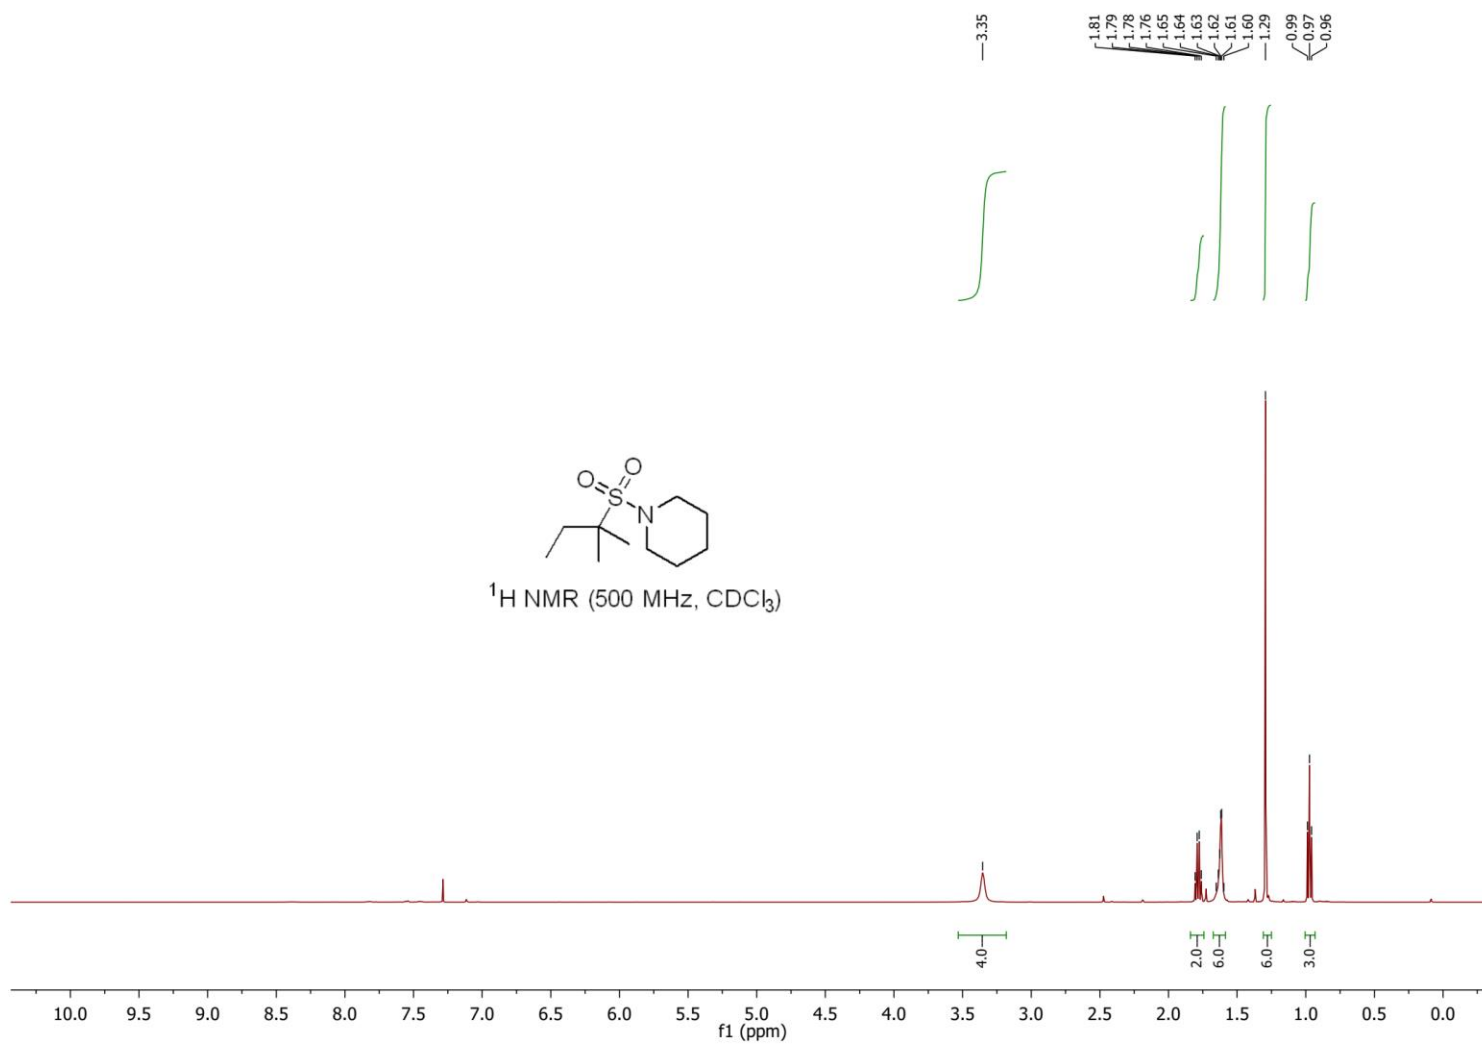

1-(*tert*-Pentylsulfonyl)piperidine (2f)

— 64.8 — 48.6 — 28.8 — 26.6 — 24.1 — 21.0 — 8.5

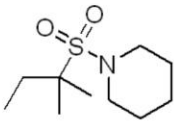

<sup>13</sup>C NMR (125 MHz, CDCl<sub>3</sub>)

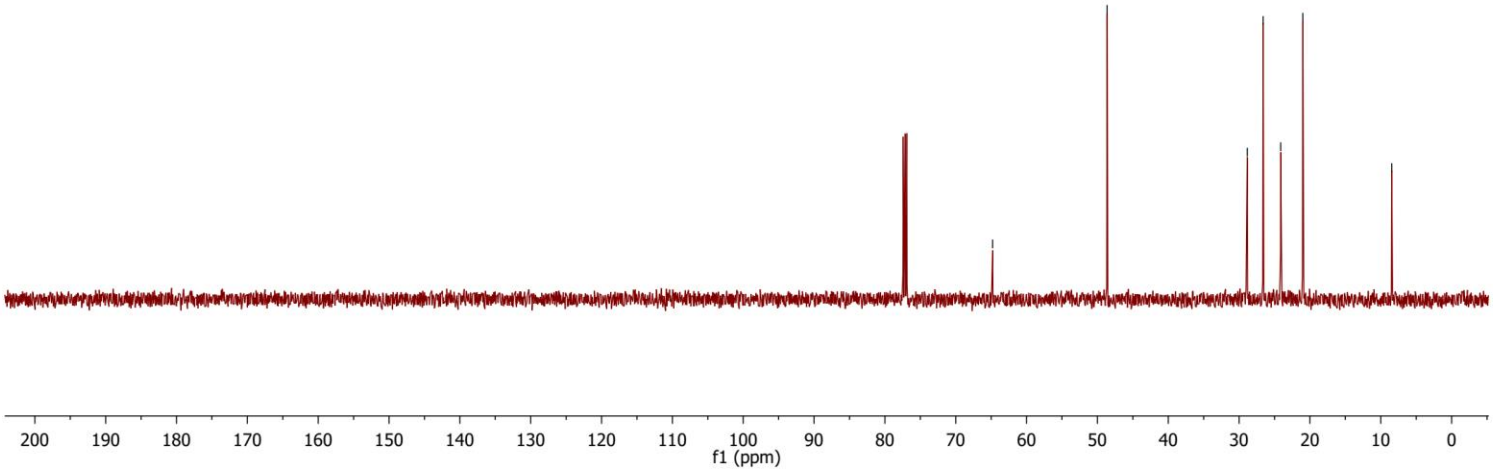

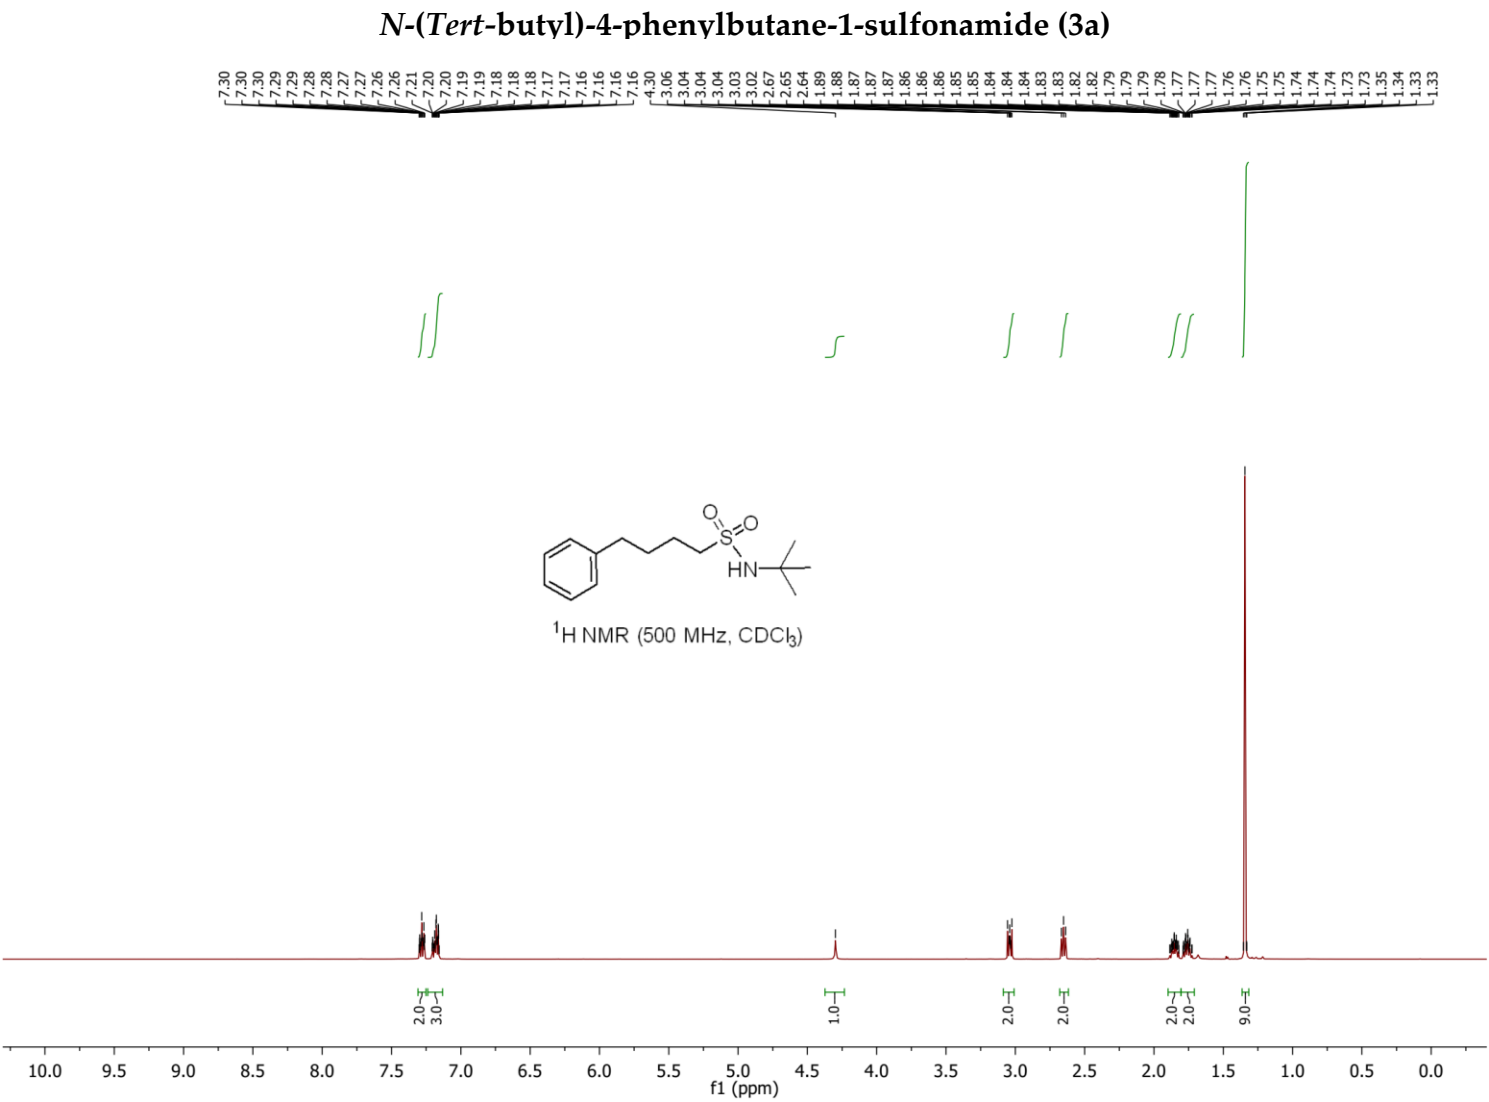



***N*-(*Tert*-butyl)-4-phenylbutane-1-sulfonamide (3a)**

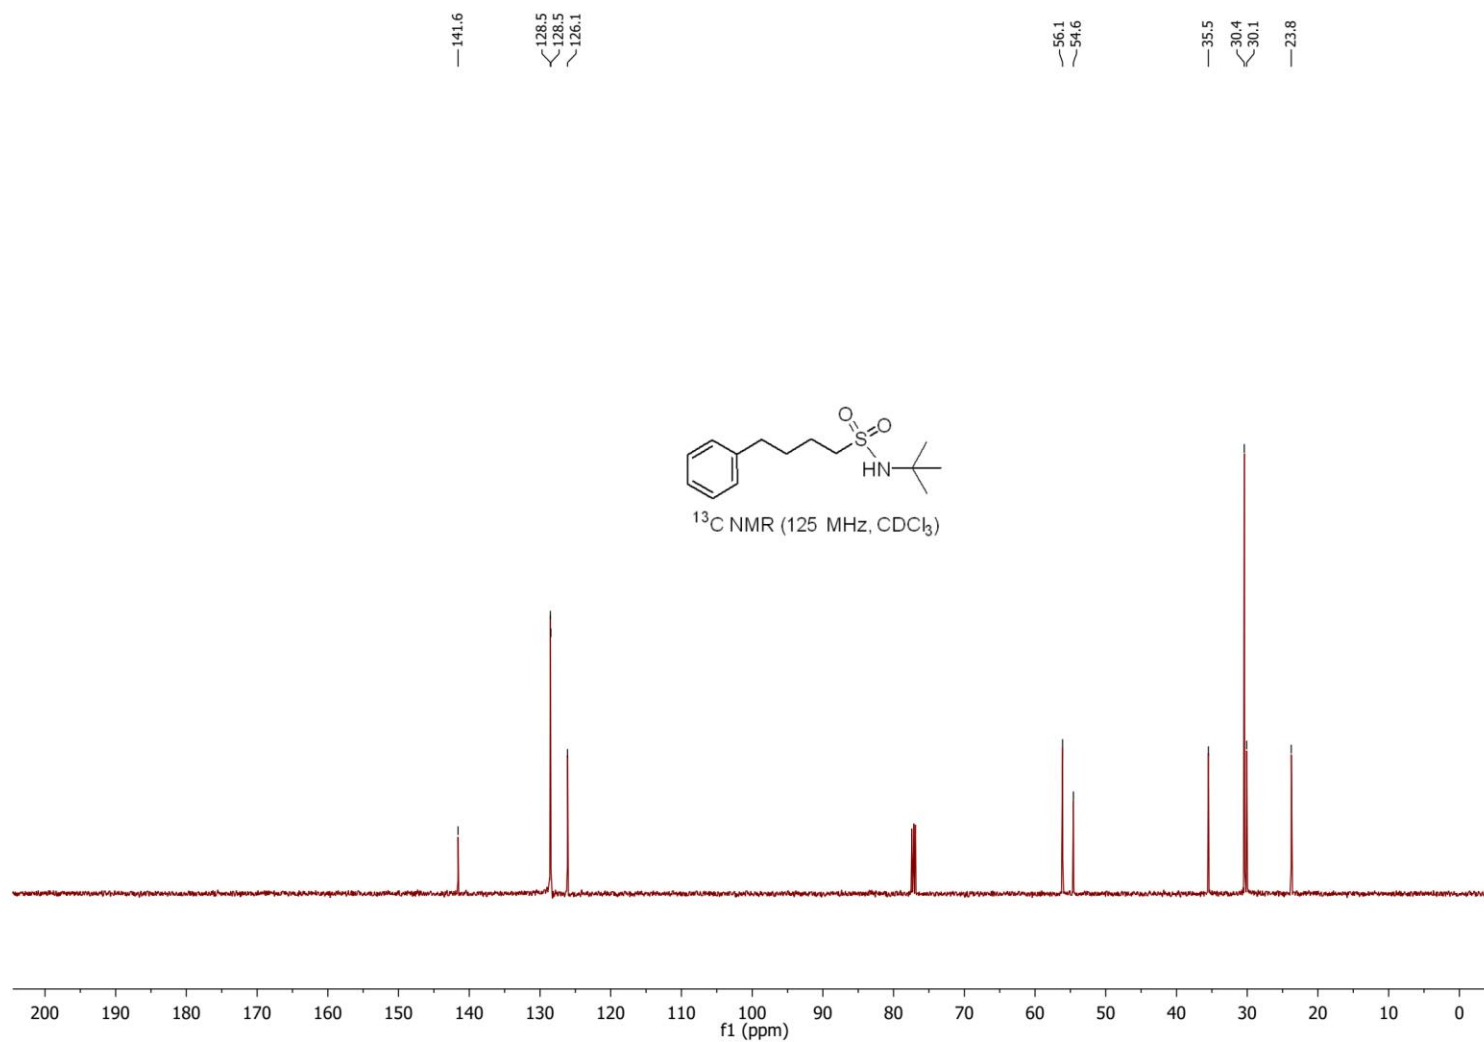

# ***N*-(*tert*-Butyl)tetrahydro-2*H*-pyran-4-sulfonamide (3b)**

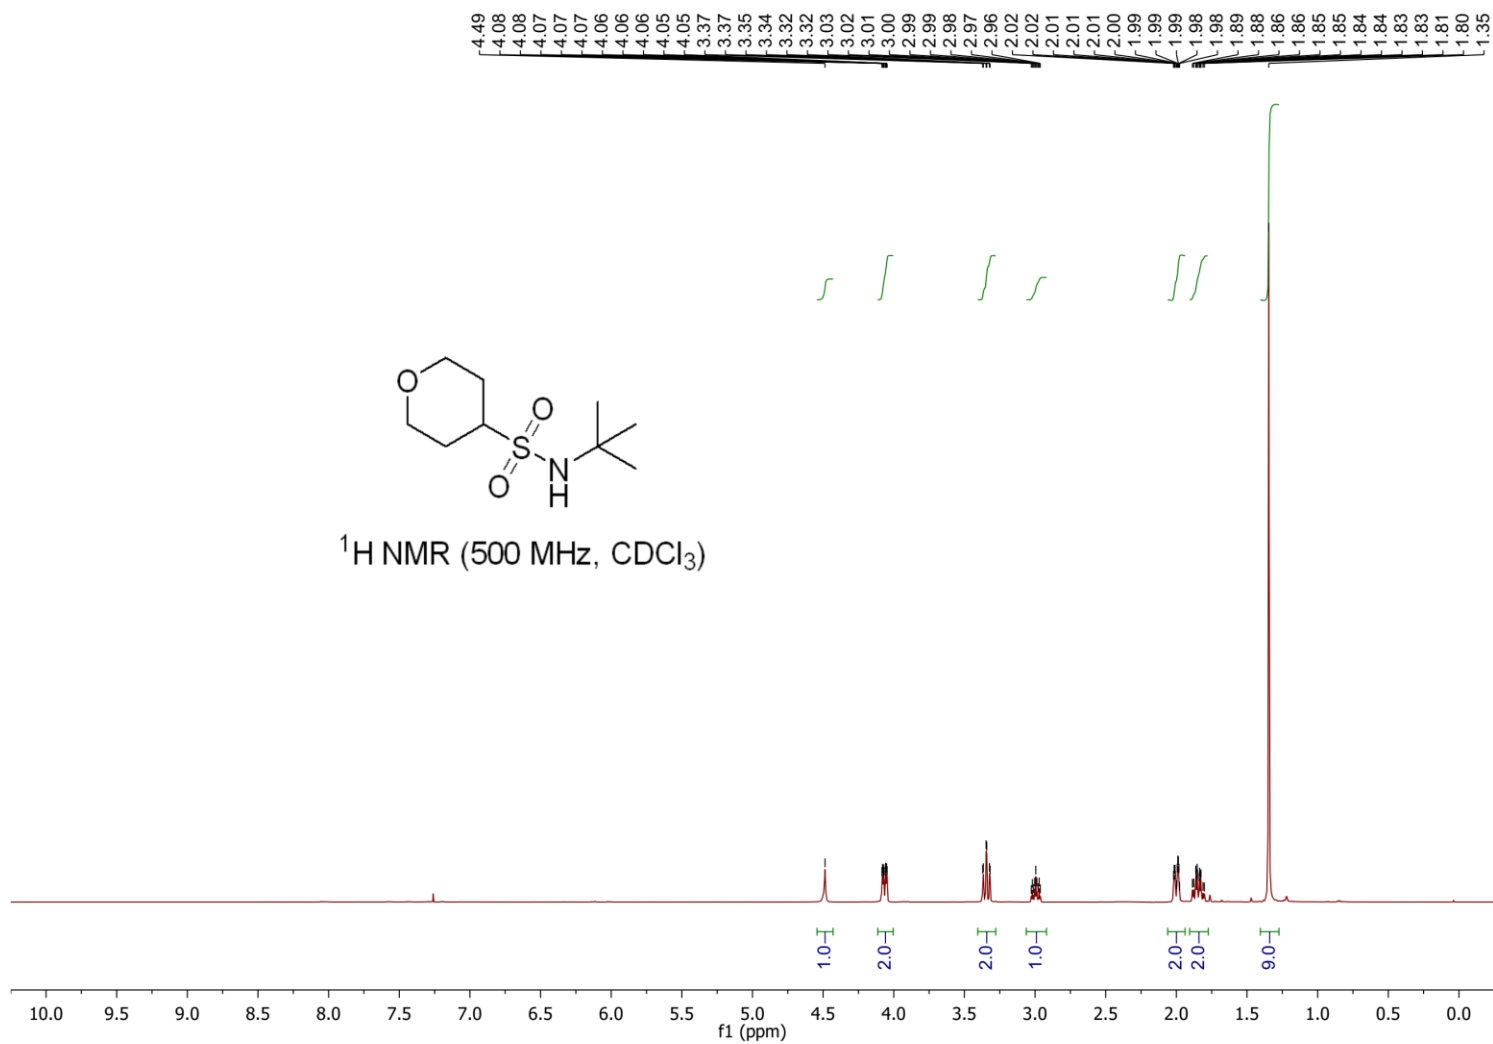

***N*-(*tert*-Butyl)tetrahydro-2*H*-pyran-4-sulfonamide (3b)**

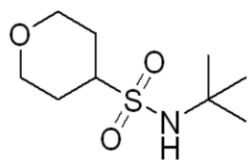

$^{13}\text{C}$  NMR (125 MHz,  $\text{CDCl}_3$ )

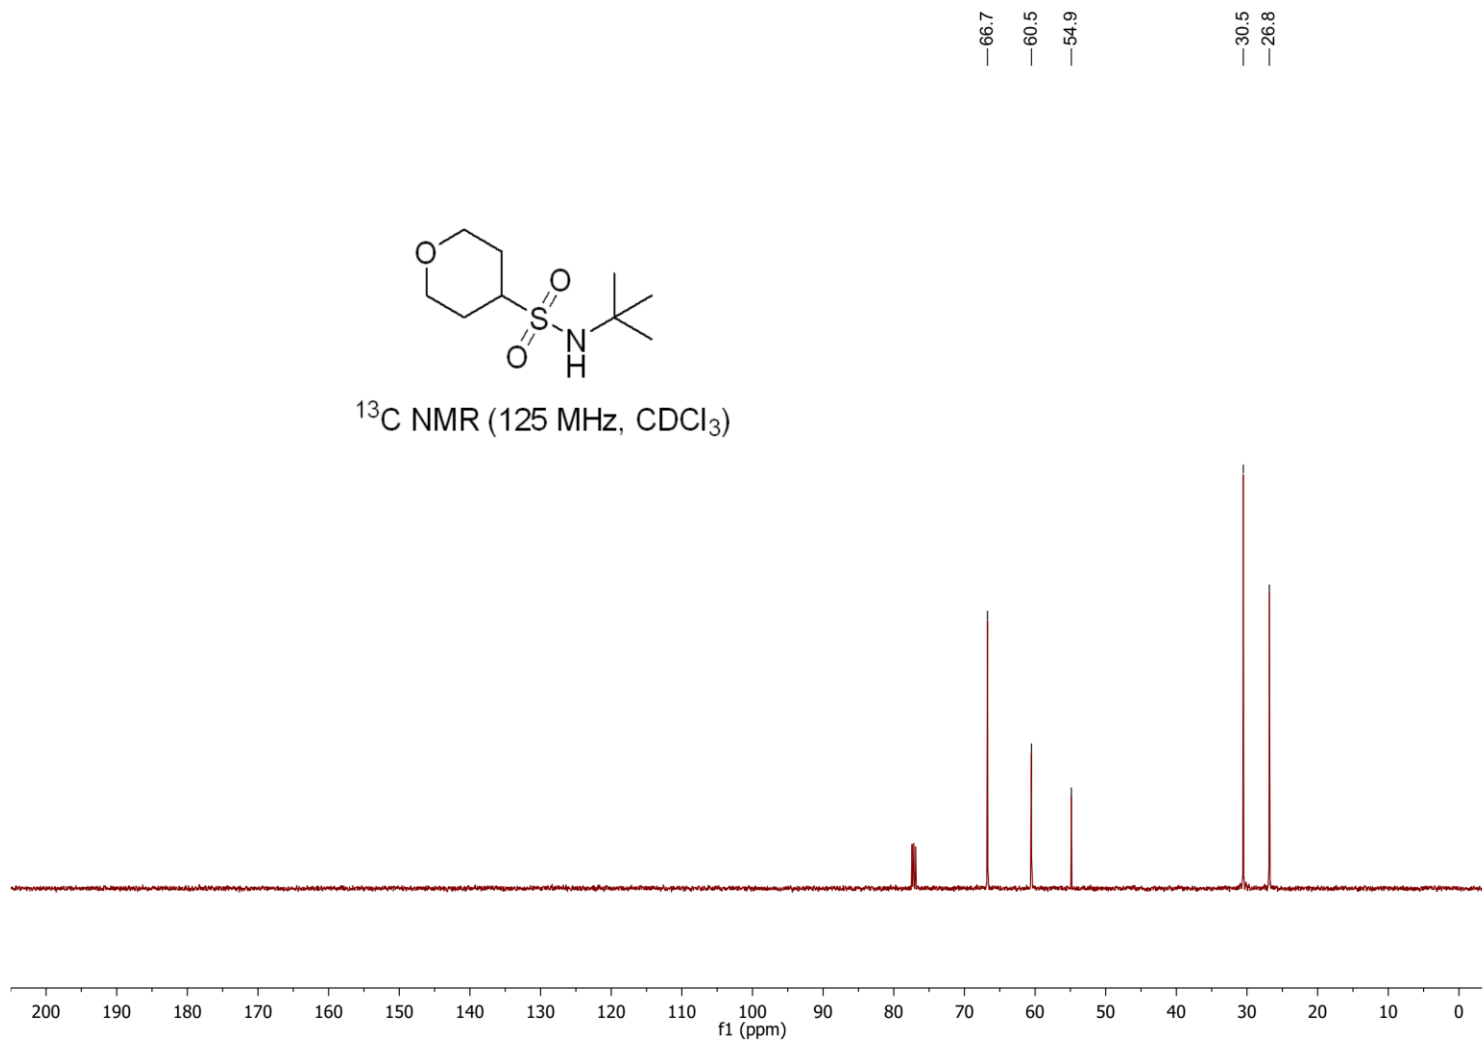

***tert*-Butyl 4-(*N*-(*tert*-butyl)sulfamoyl)piperidine-1-carboxylate (3c)**

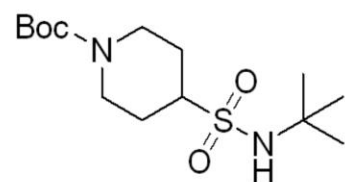

<sup>1</sup>H NMR (500 MHz, CDCl<sub>3</sub>)

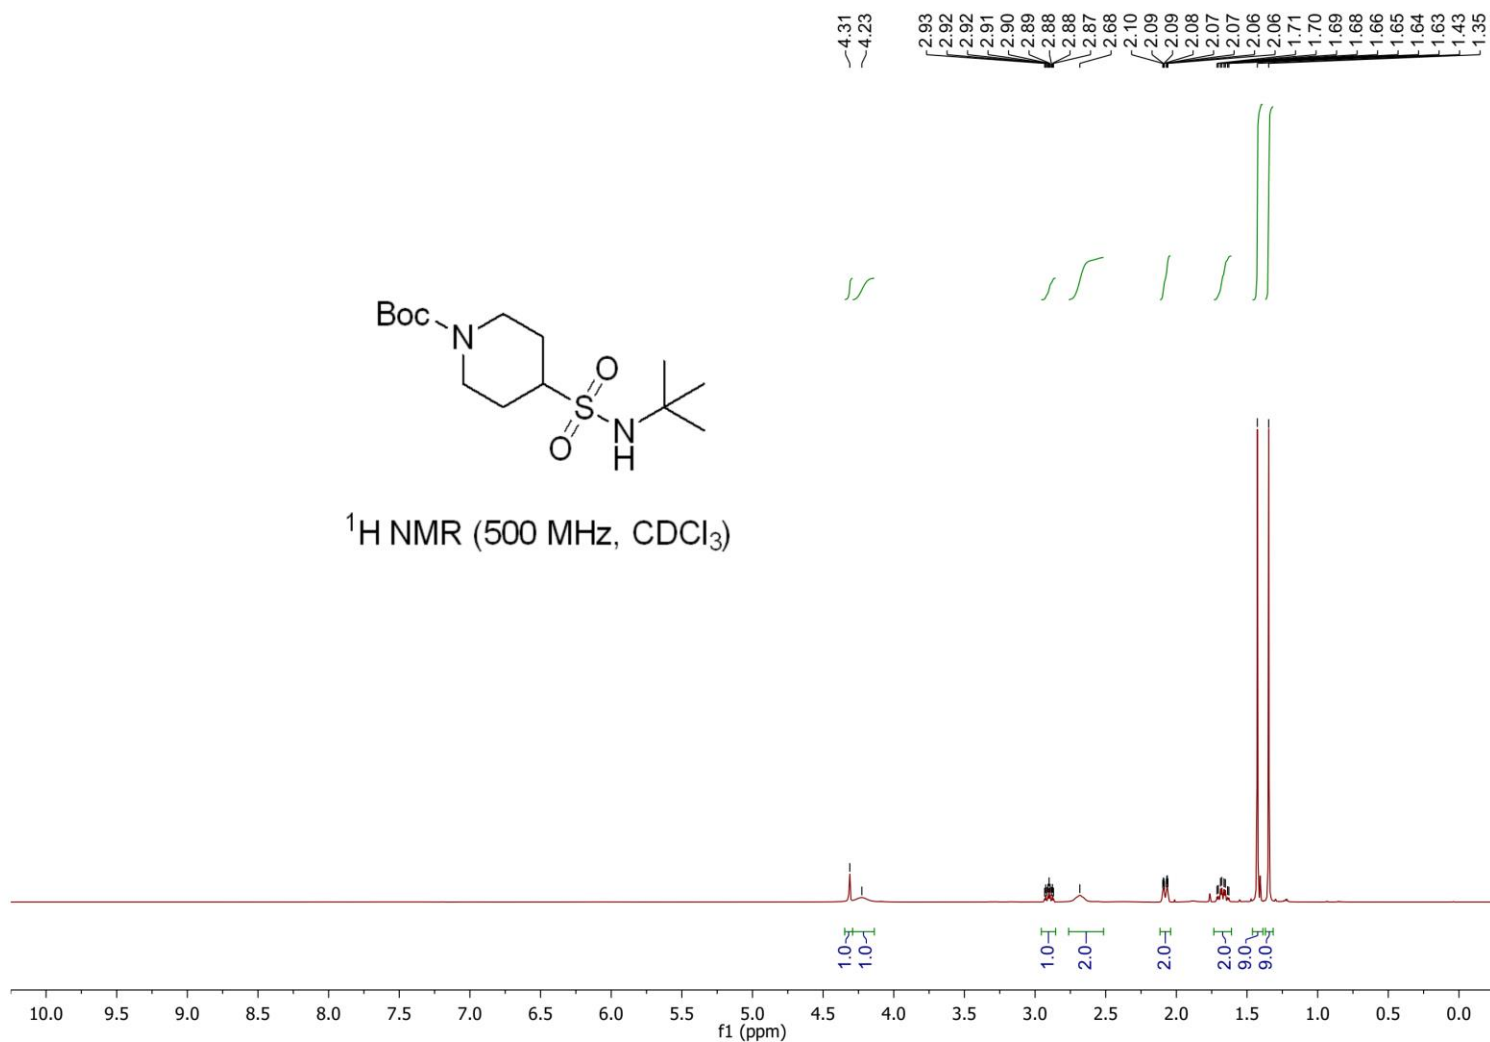

***tert*-Butyl 4-(*N*-(*tert*-butyl)sulfamoyl)piperidine-1-carboxylate (3c)**

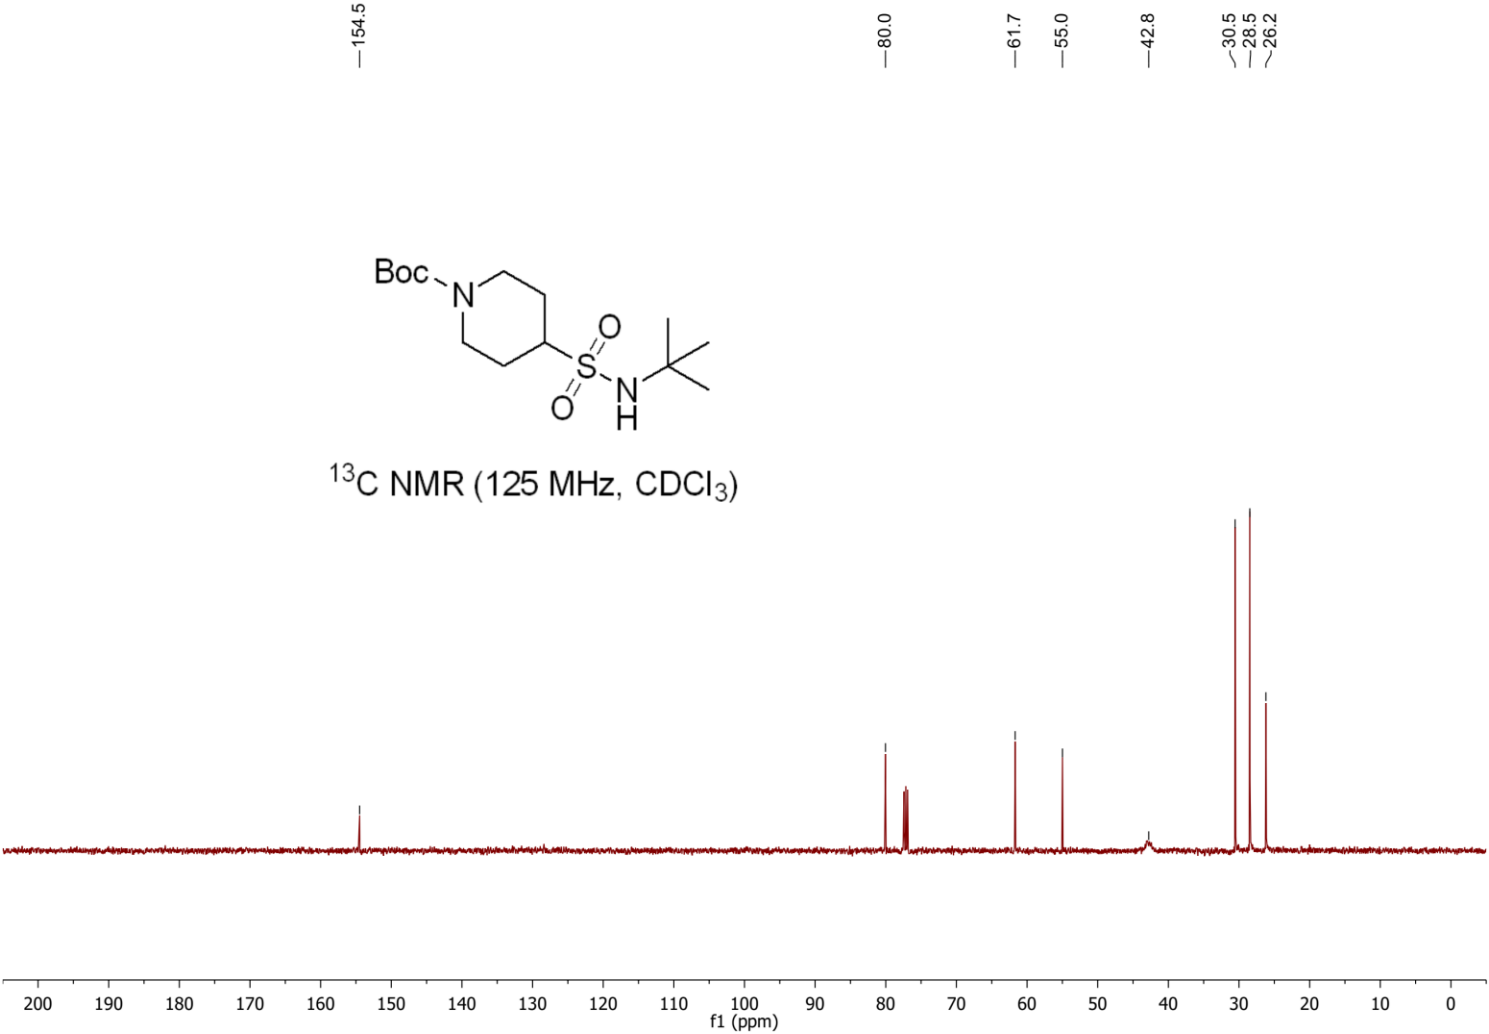

***N*-(*tert*-Butyl)-2-methylpropane-2-sulfonamide (3d)**

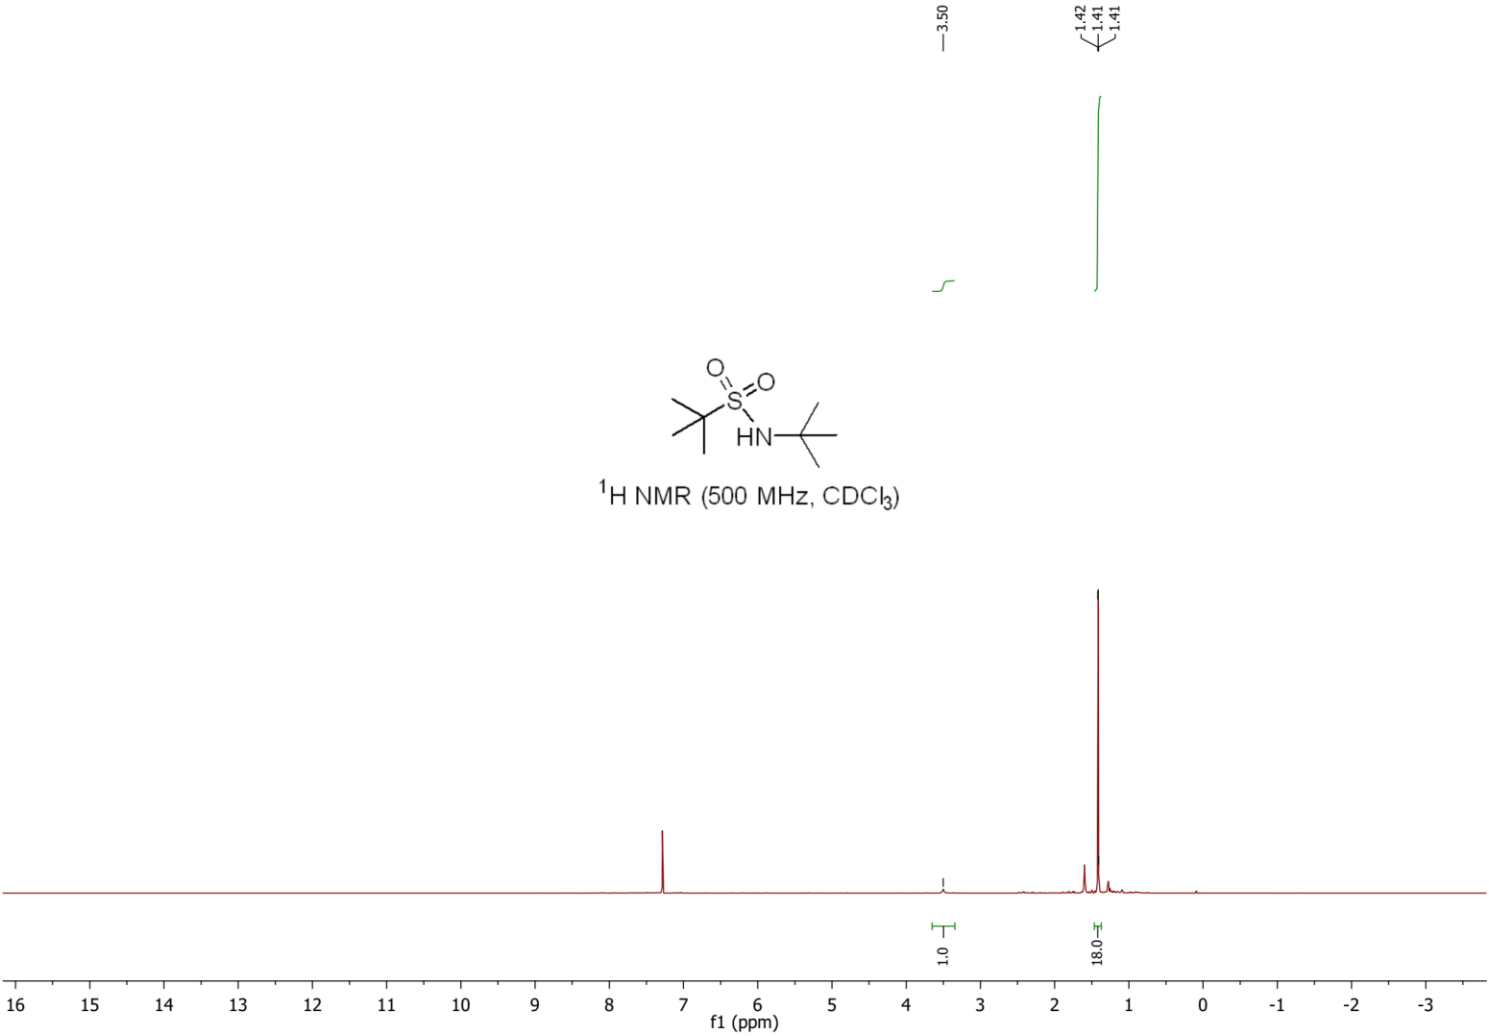

***N*-(*tert*-Butyl)-2-methylpropane-2-sulfonamide (3d)**

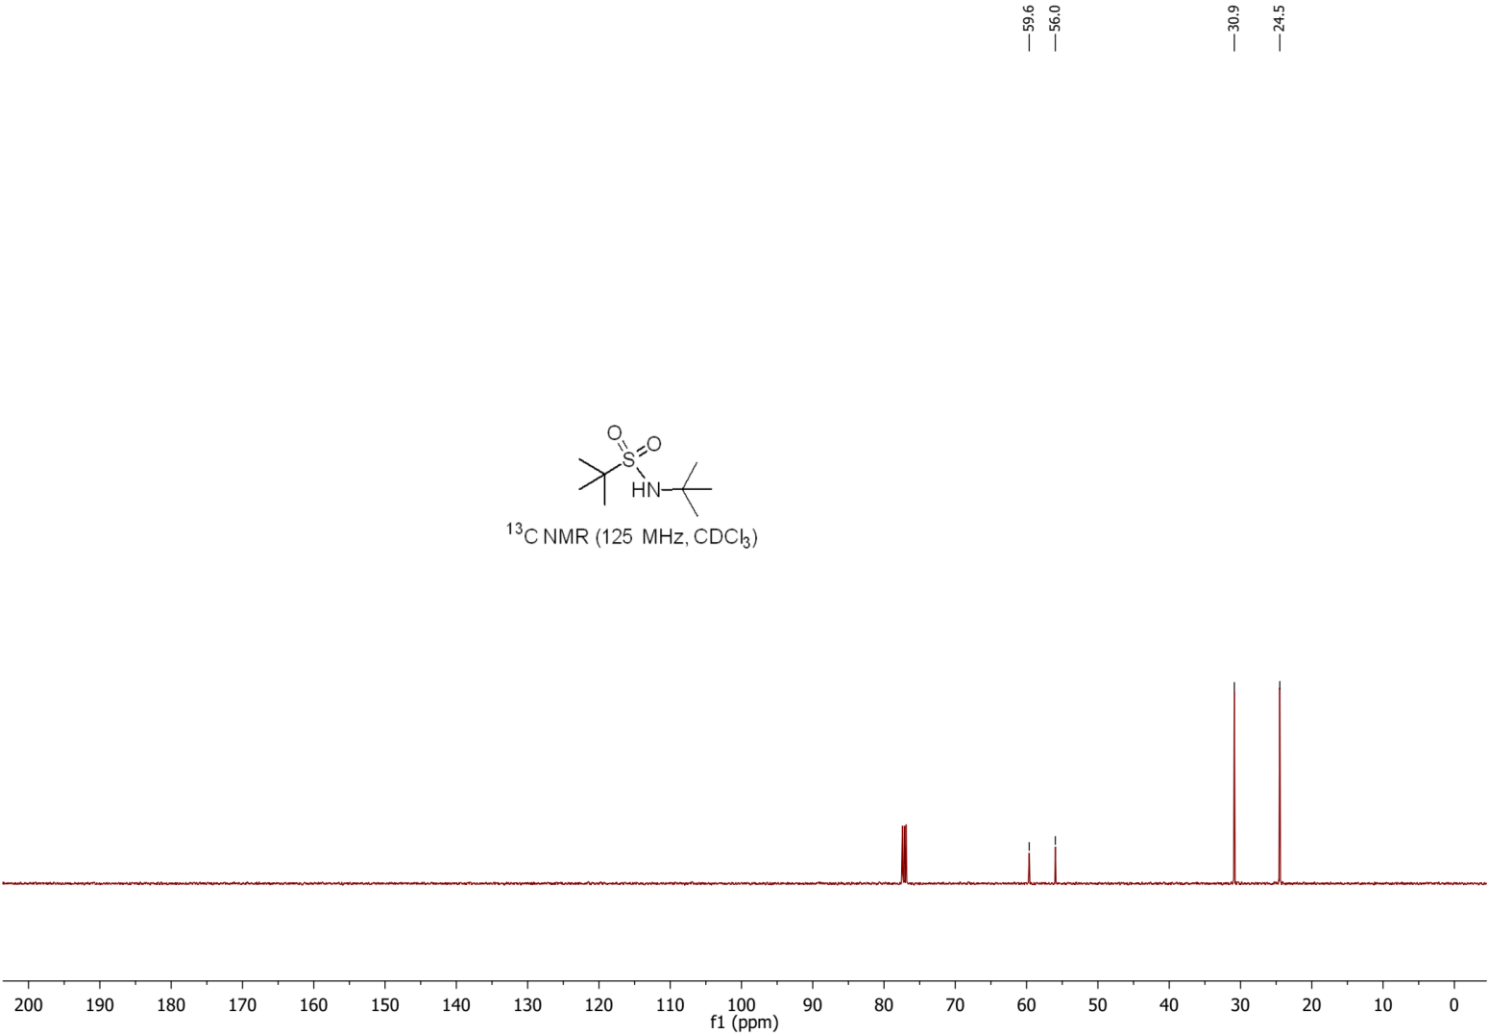

**(3*s*,5*s*,7*s*)-N-(*tert*-Butyl)adamantane-1-sulfonamide (3e)**

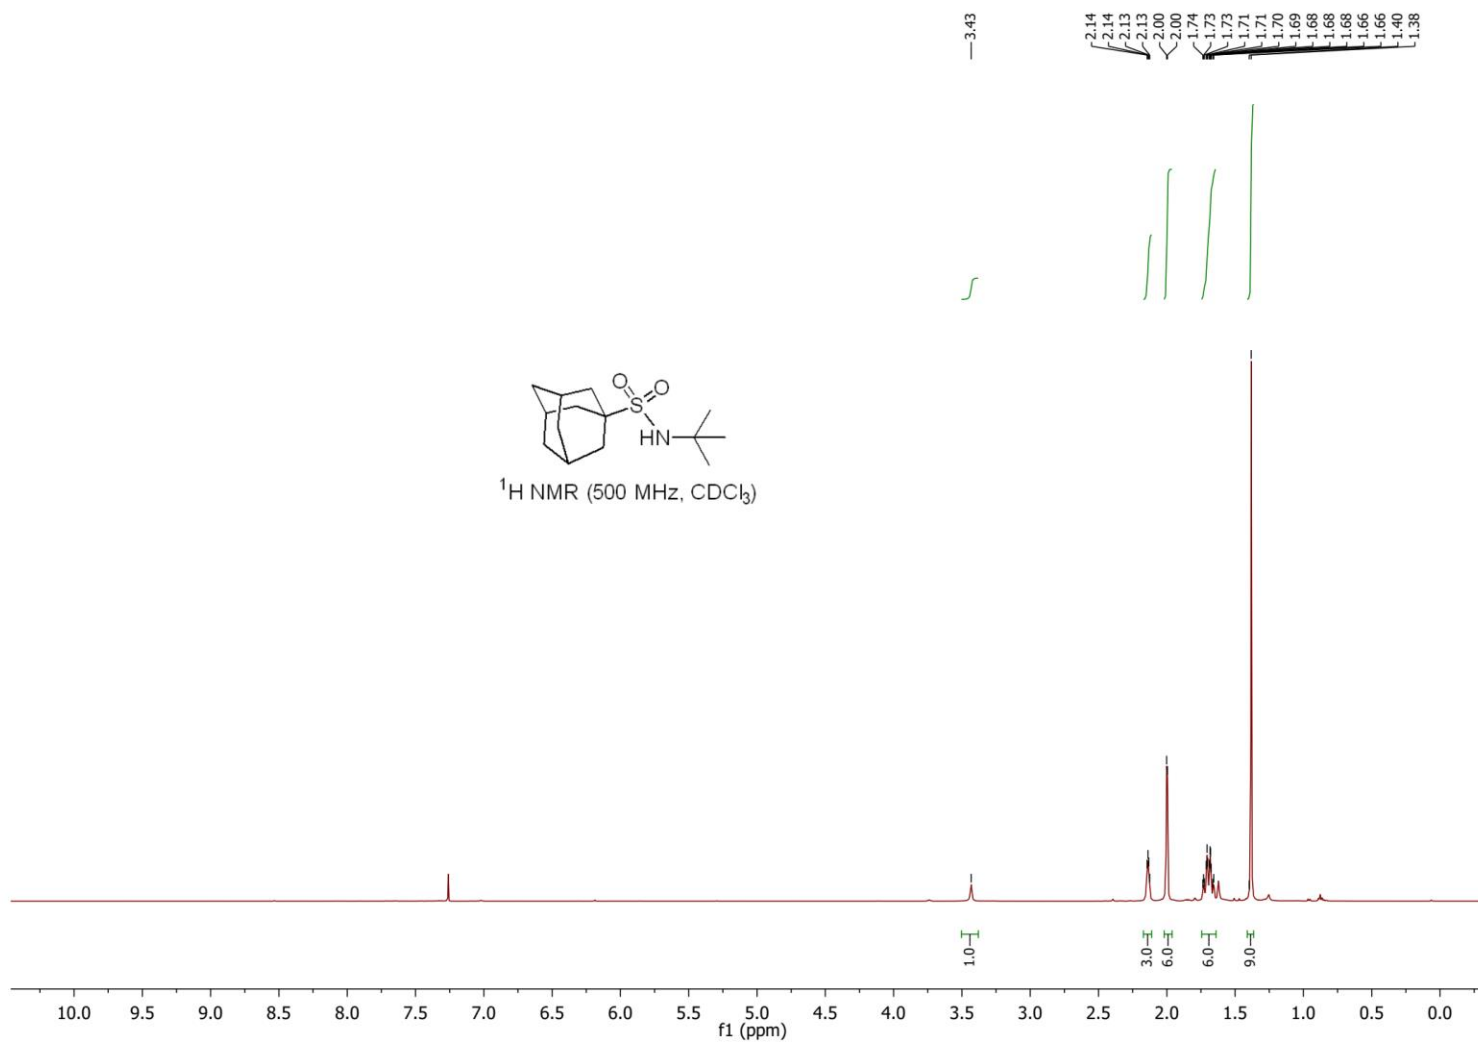



(3*s*,5*s*,7*s*)-N-(*tert*-Butyl)adamantane-1-sulfonamide (3e)

— 60.5  
— 55.6  
35.9  
35.7  
— 30.8  
— 28.2

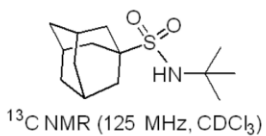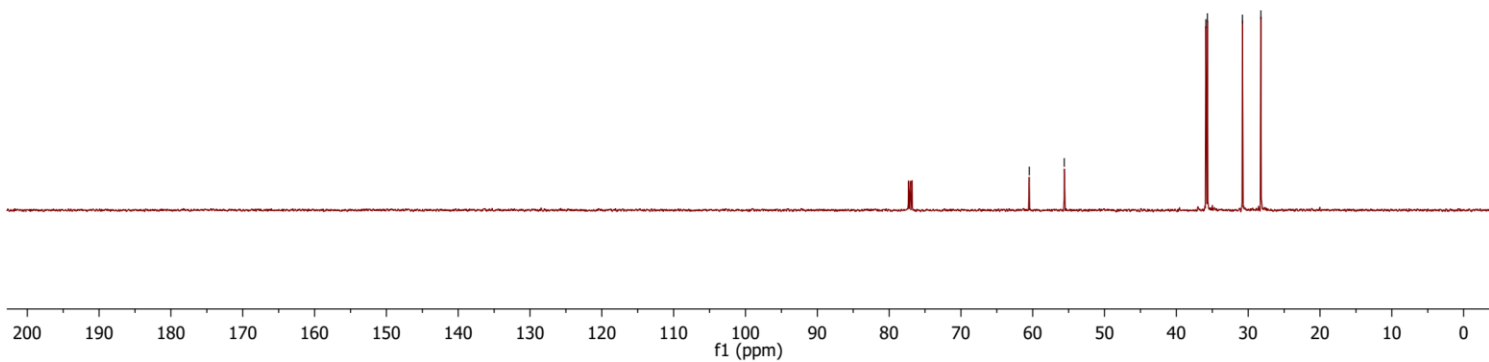

# ***N*-(*tert*-Butyl)-5-(2,5-dimethylphenoxy)-2-methylpentane-2-sulfonamide (3f)**

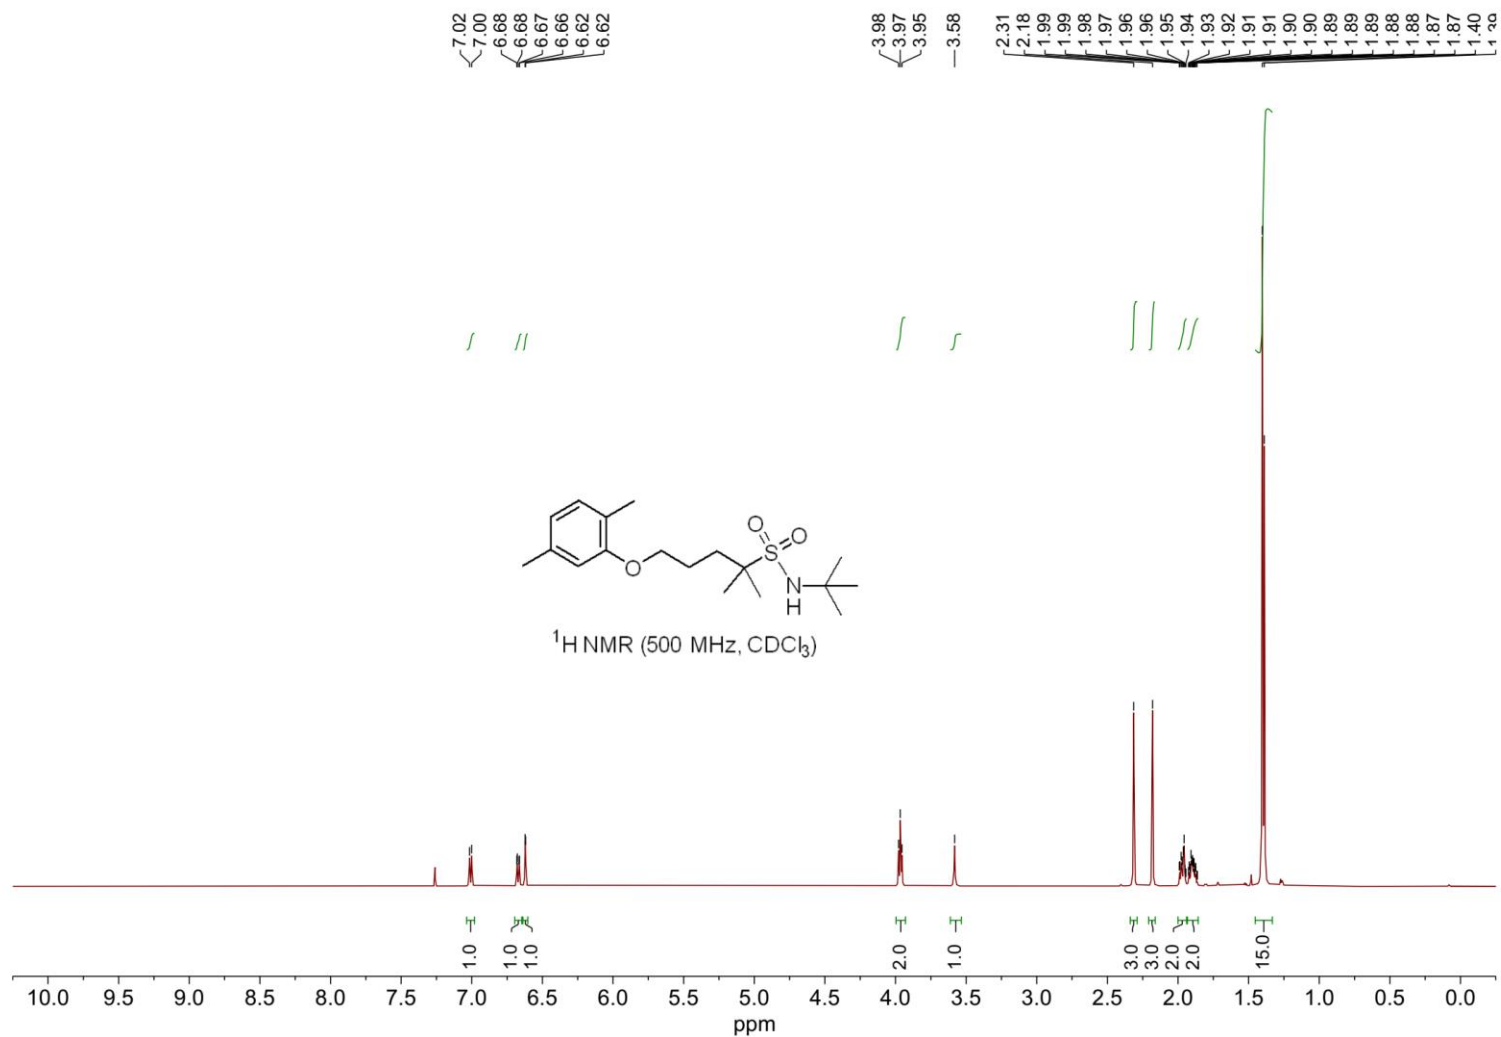

# ***N*-(*tert*-Butyl)-5-(2,5-dimethylphenoxy)-2-methylpentane-2-sulfonamide (3f)**

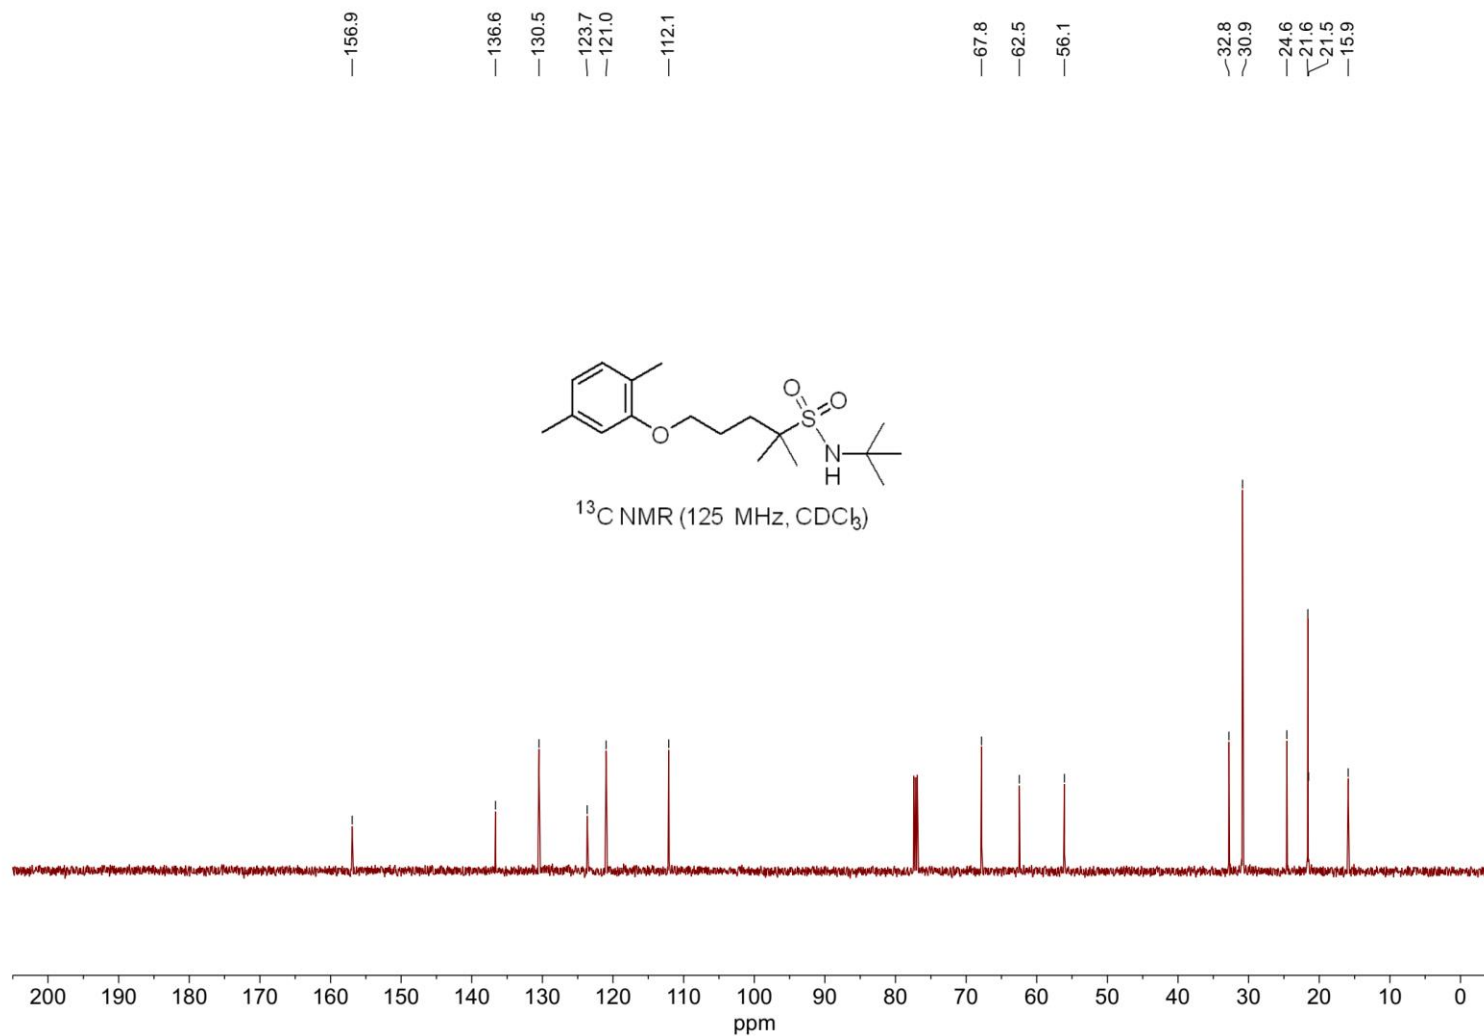

**N-Benzylpentadecane-1-sulfonamide (4a)**

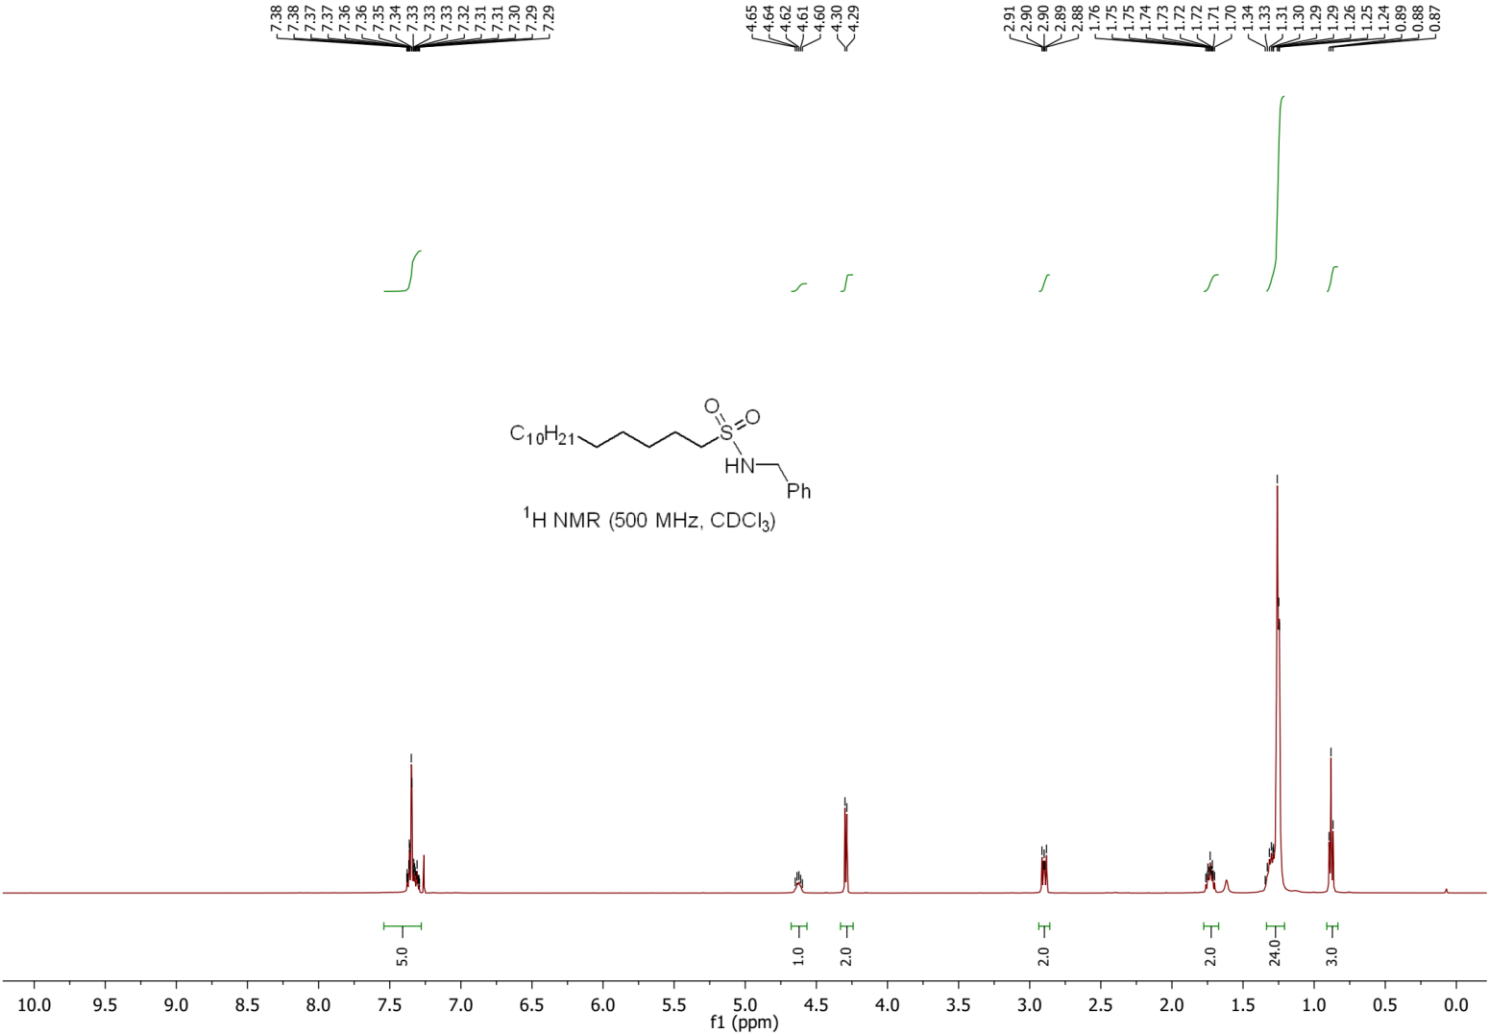

**N-Benzylpentadecane-1-sulfonamide (4a)**

— 137.1  
— 129.0  
— 128.2  
— 128.1

— 53.5  
— 47.4

32.1  
29.8  
29.8  
29.7  
29.7  
29.5  
29.4  
29.2  
28.3  
23.7  
22.8  
14.3

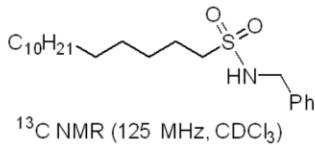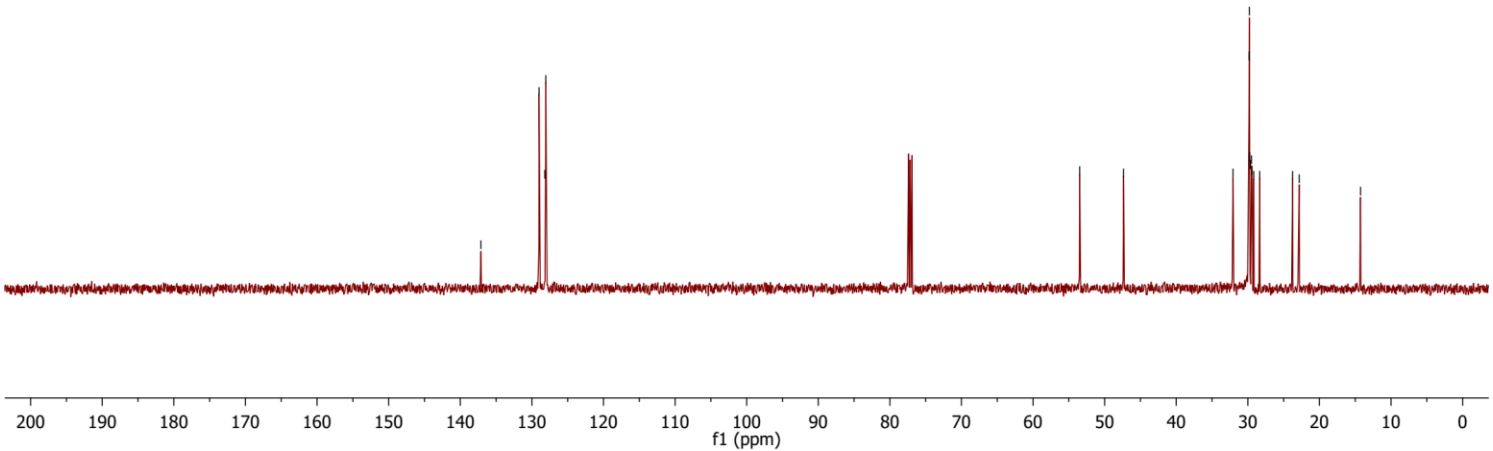

# **N-Benzyltetrahydro-2H-pyran-4-sulfonamide (4b)**

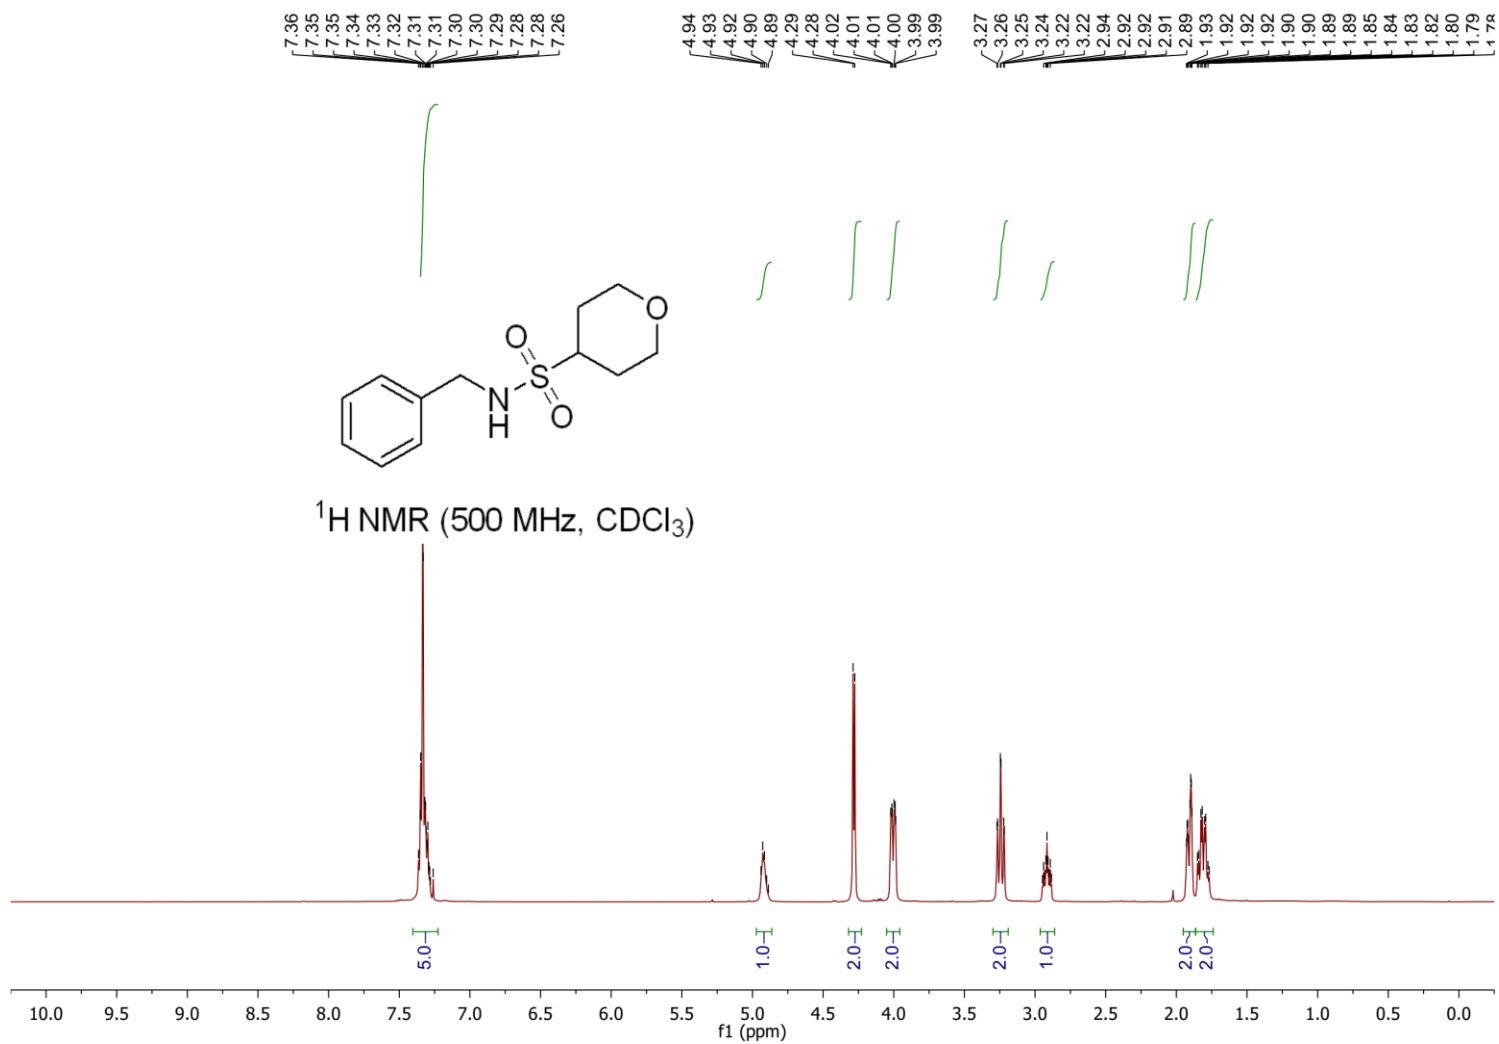

***N*-Benzyltetrahydro-2*H*-pyran-4-sulfonamide (4b)**

—137.3  
128.9  
128.1  
128.0

—66.6

—58.9

—47.6

—26.6

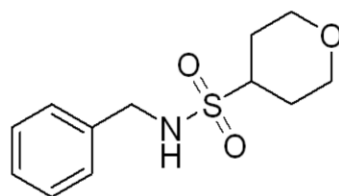

$^{13}\text{C}$  NMR (125 MHz,  $\text{CDCl}_3$ )

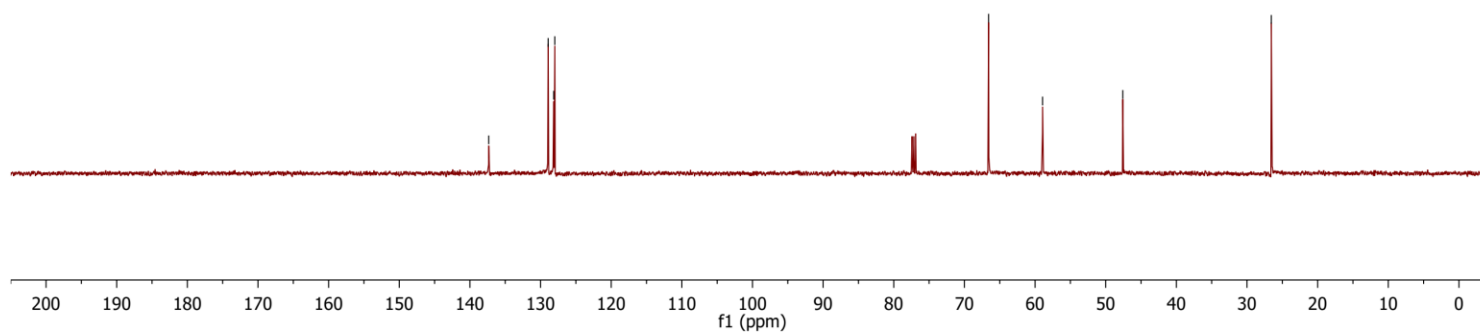

# **N-Benzyl-2-methylpropane-2-sulfonamide (4c)**

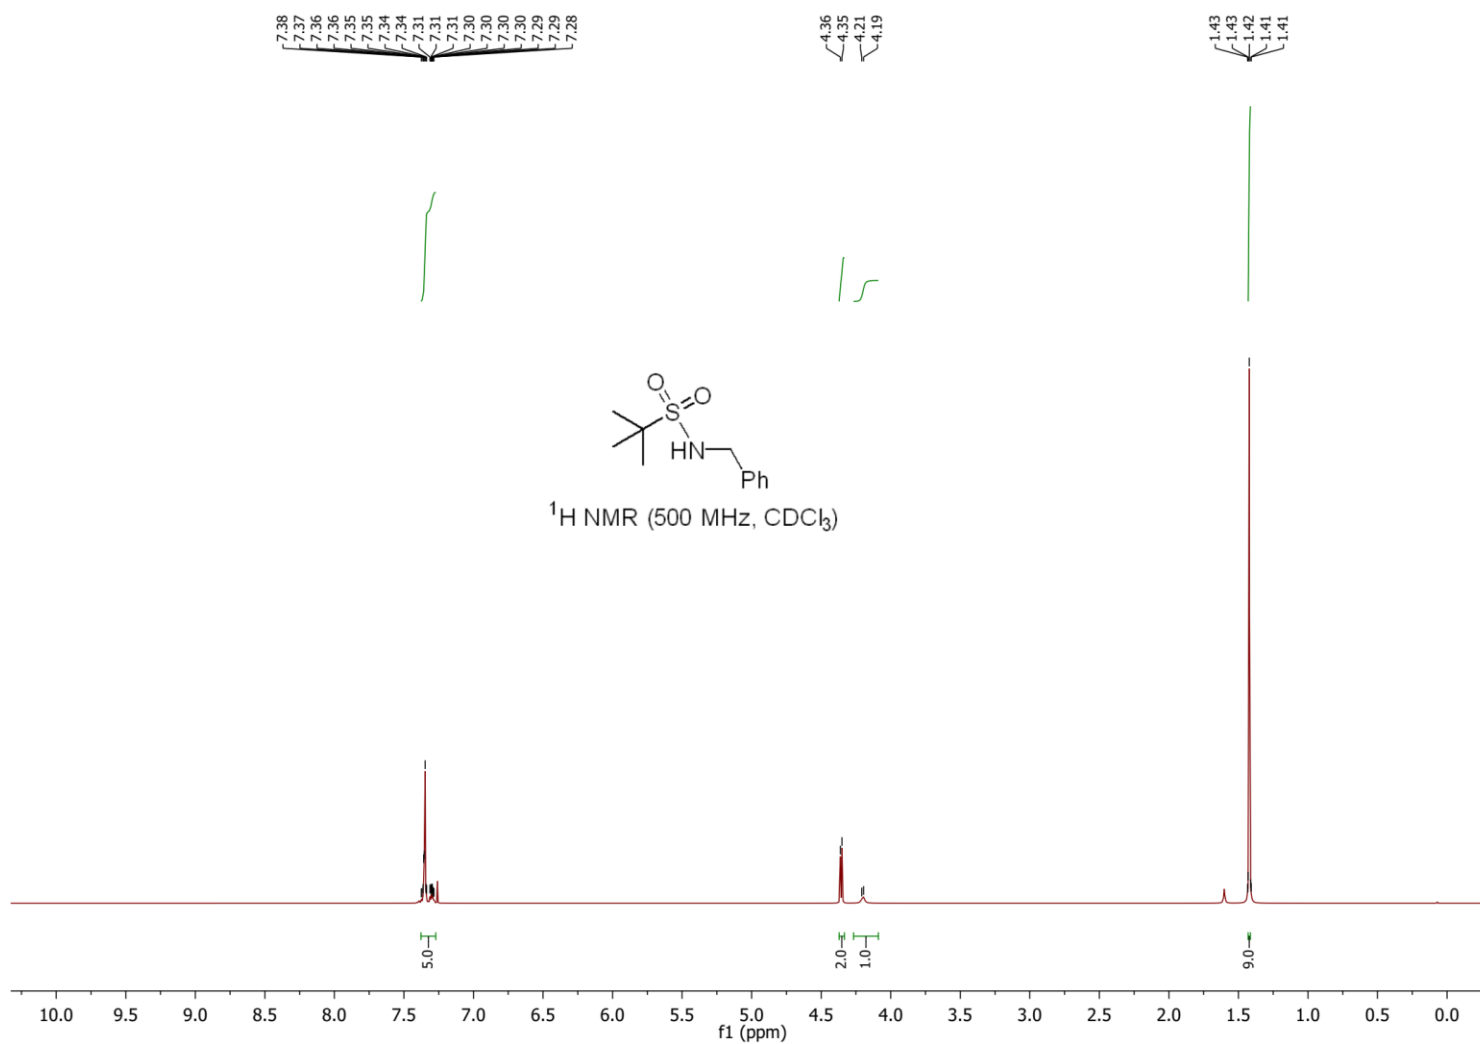



**N-Benzyl-2-methylpropane-2-sulfonamide (4c)**

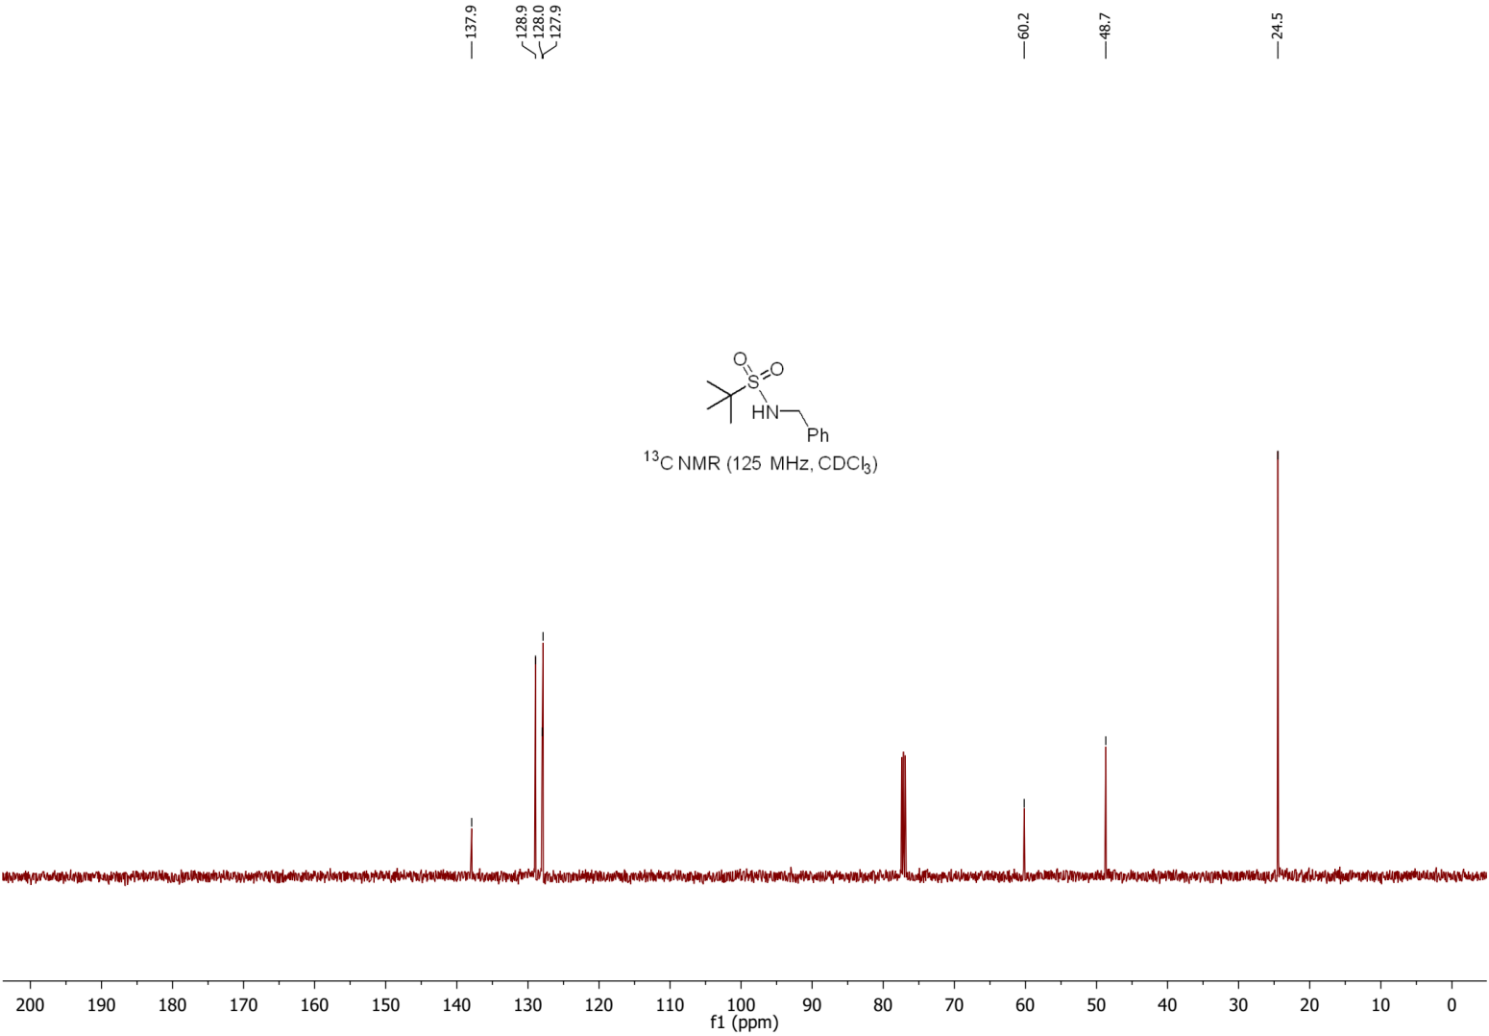

# **N-Benzyladamantane-1-sulfonamide (4d)**

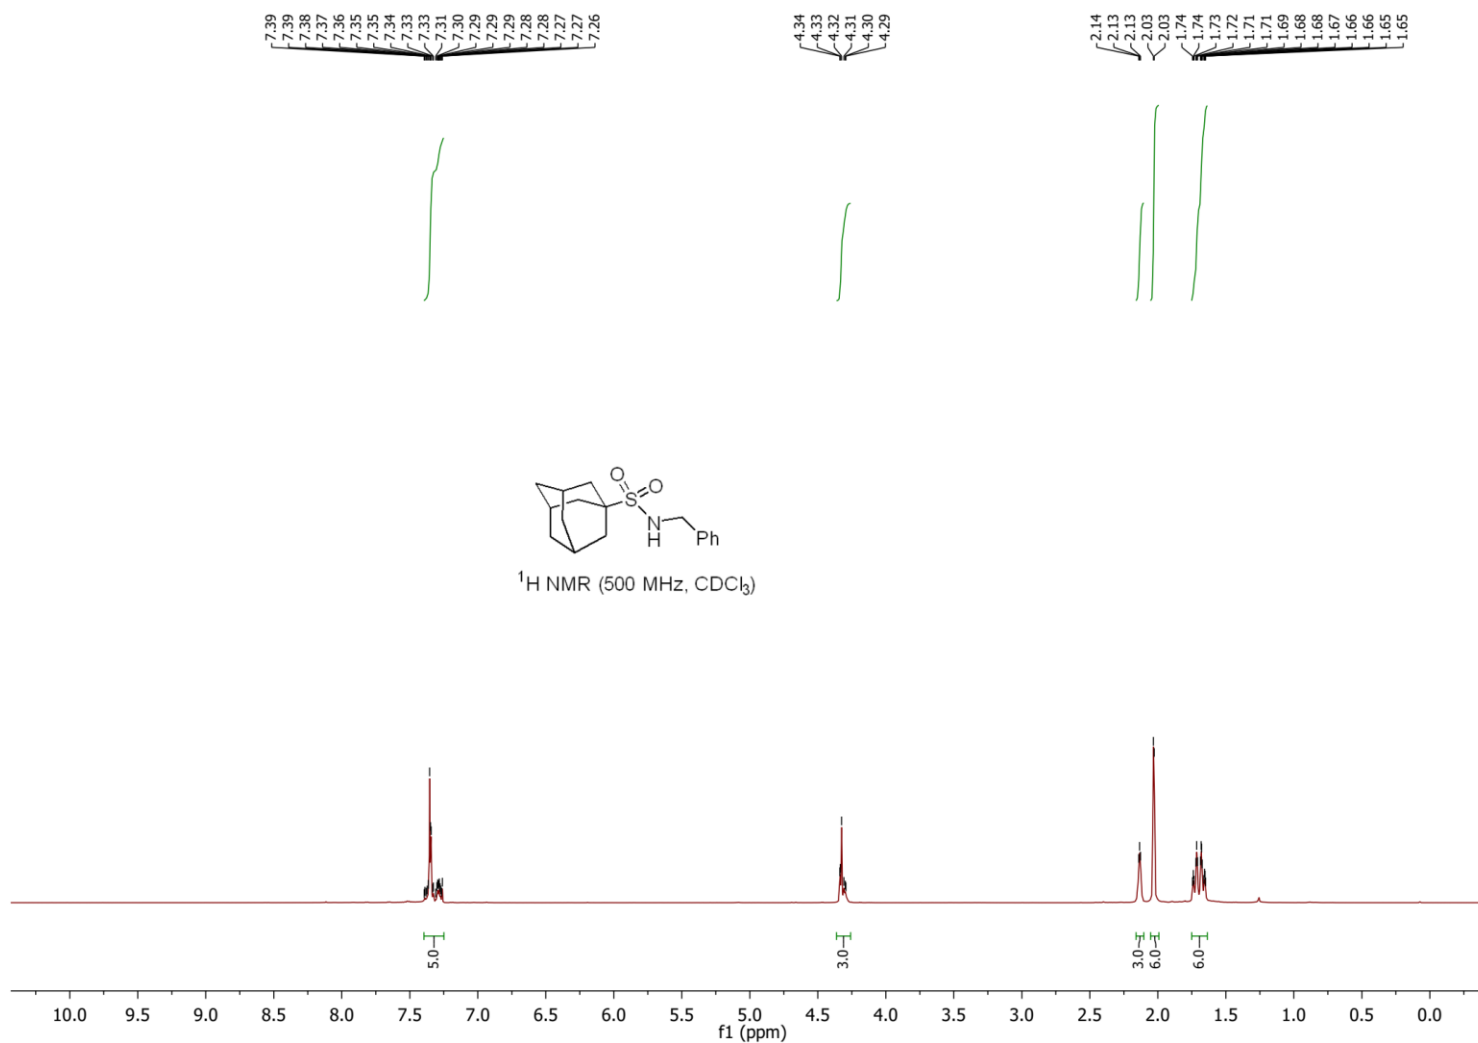

**N-Benzyladamantane-1-sulfonamide (4d)**

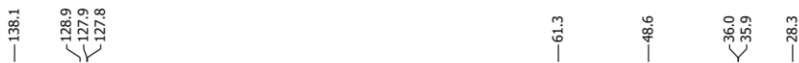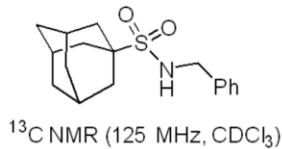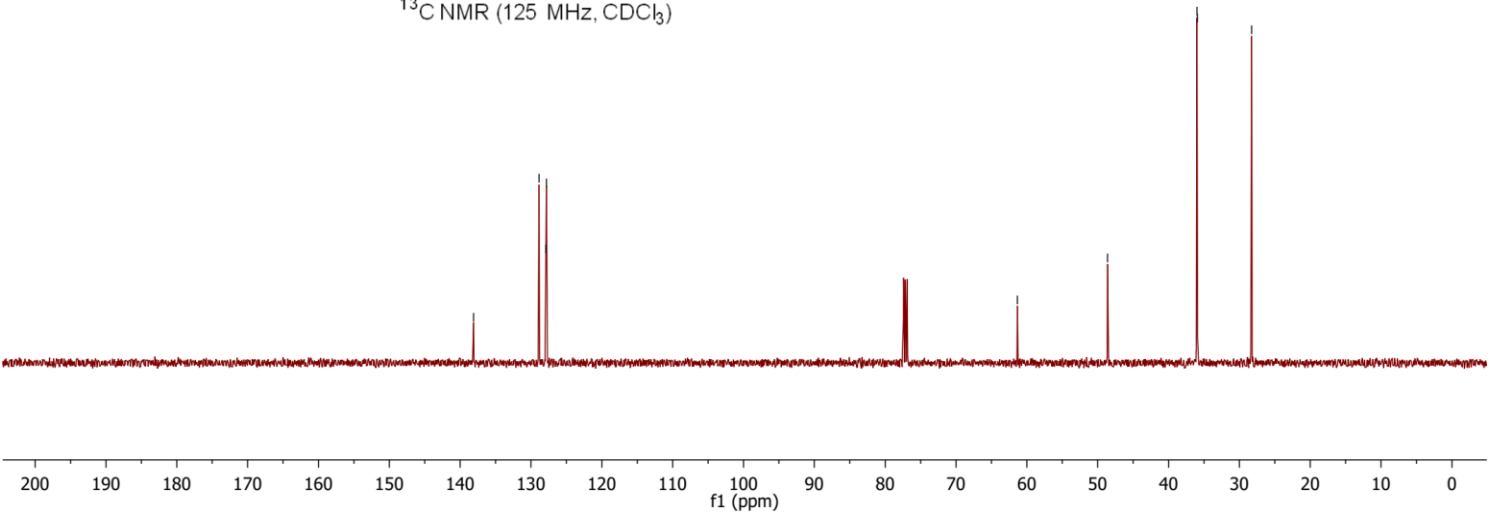

# **N-(4-Fluorophenethyl)-4-oxo-4-phenylbutane-1-sulfonamide (5a)**

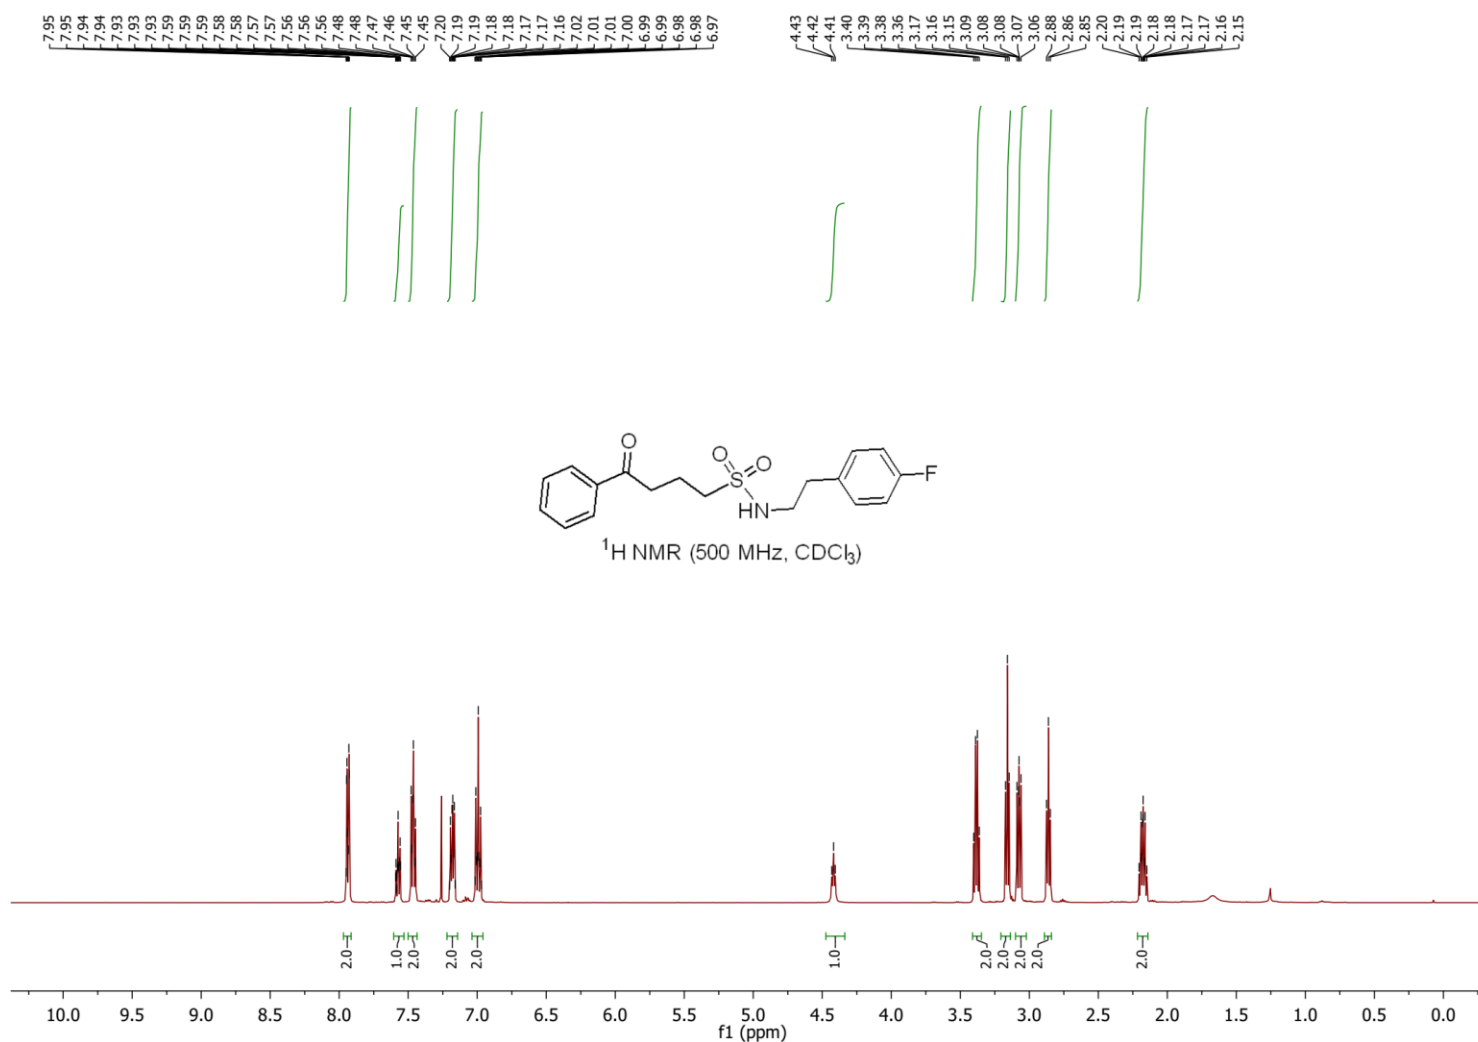

# **N-(4-Fluorophenethyl)-4-oxo-4-phenylbutane-1-sulfonamide (5a)**

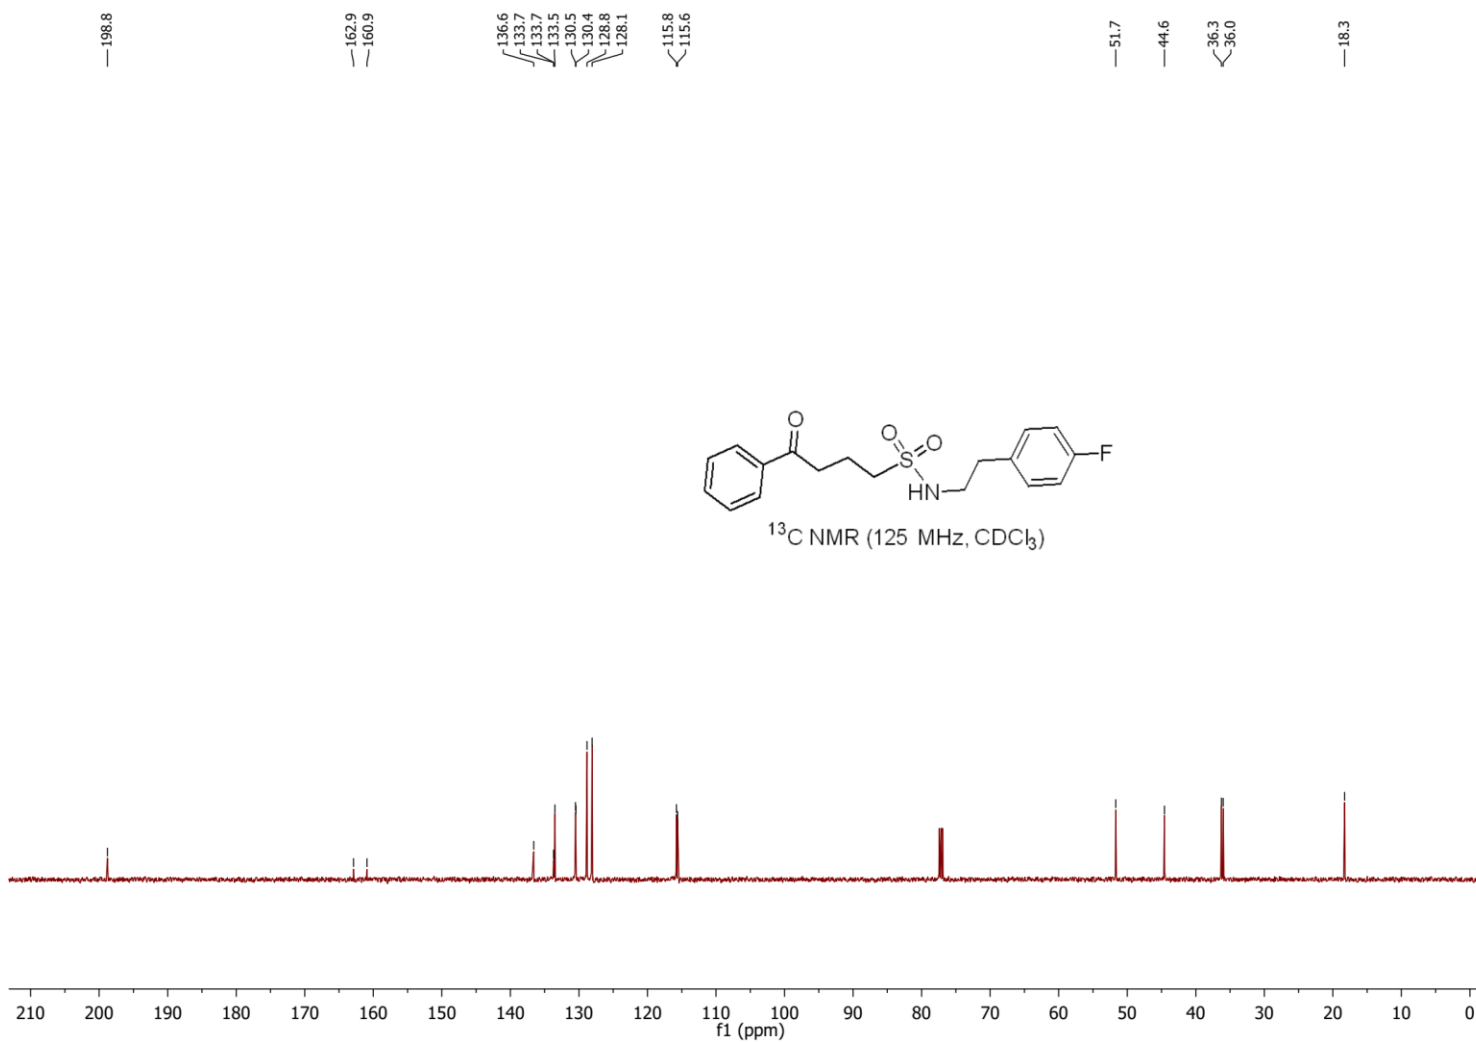

# **N-(4-Fluorophenethyl)heptane-4-sulfonamide (5b)**

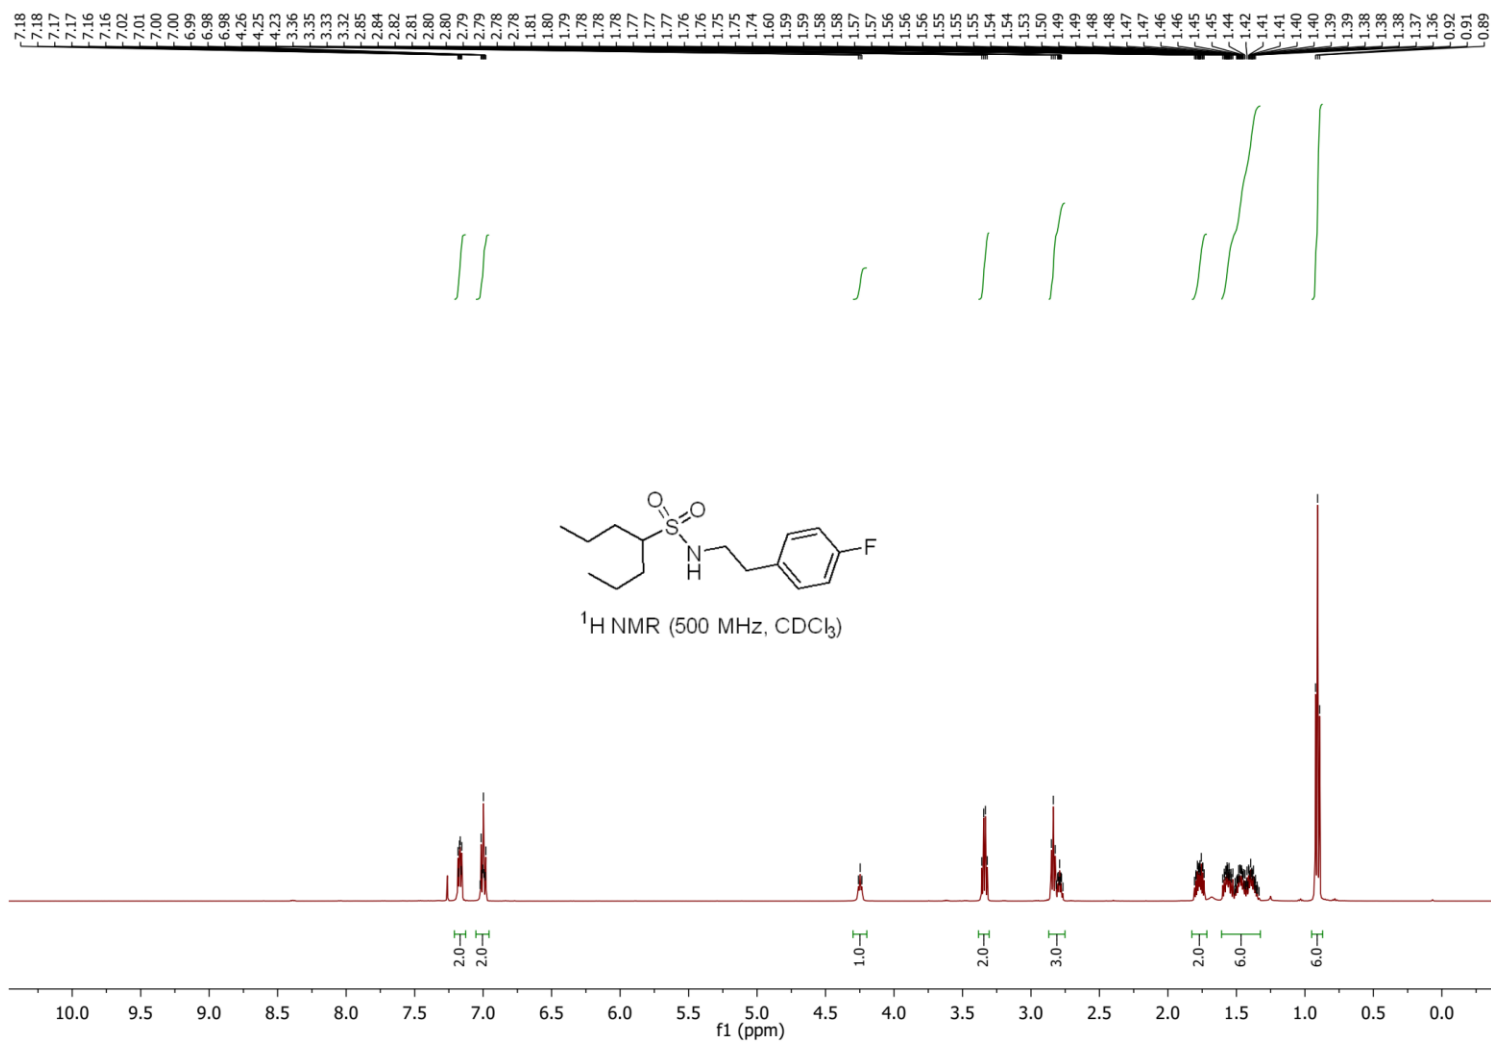

# **N-(4-Fluorophenethyl)heptane-4-sulfonamide (5b)**

162.9  
160.9  
133.8  
133.8  
130.5  
130.4  
115.8  
115.6  
62.2  
45.0  
36.3  
31.1  
20.2  
14.2

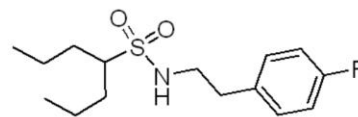

<sup>13</sup>C NMR (125 MHz, CDCl<sub>3</sub>)

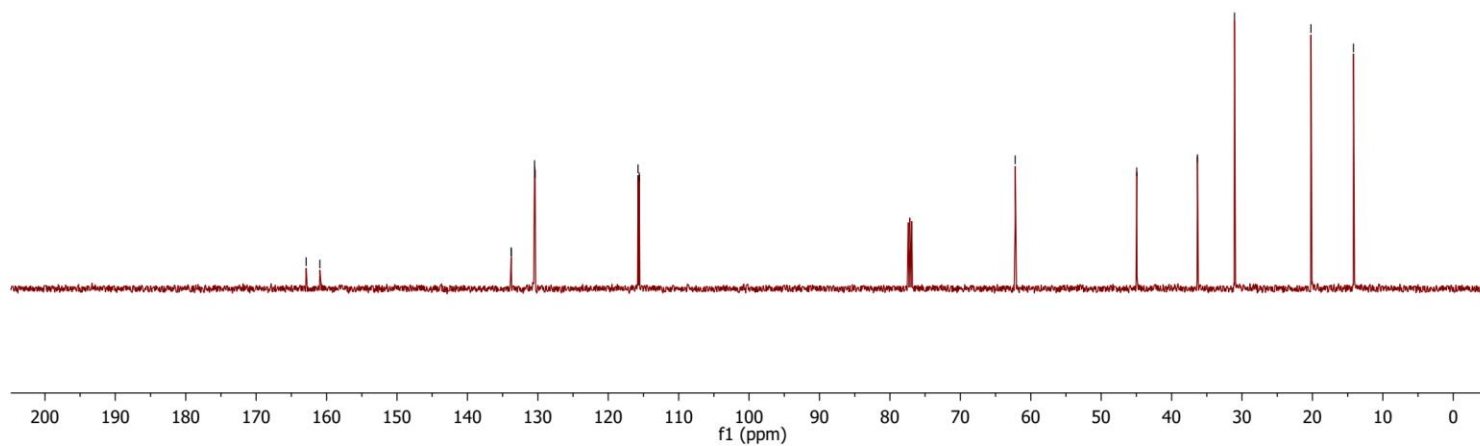

# 4,4-Difluoro-N-(4-fluorophenethyl)cyclohexane-1-sulfonamide (5c)

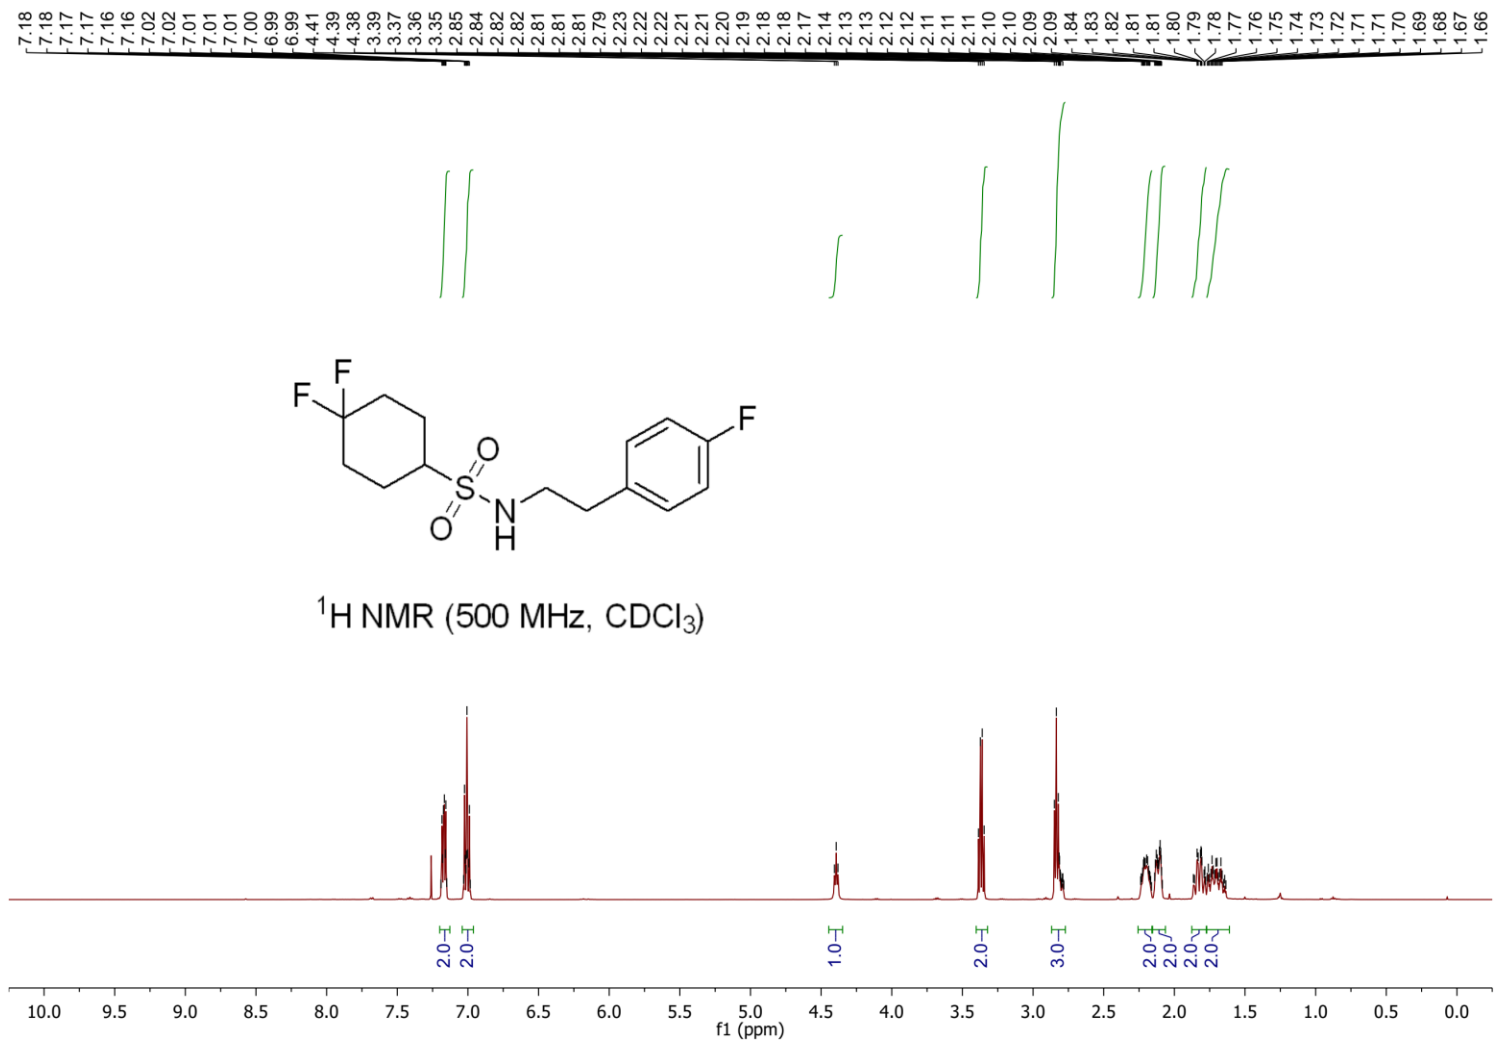



# 4,4-Difluoro-*N*-(4-fluorophenethyl)cyclohexane-1-sulfonamide (5c)

162.9  
161.0  
133.6  
133.6  
130.5  
130.4  
123.9  
122.0  
120.1  
115.8  
115.7  
59.0  
45.1  
36.4  
32.5  
32.3  
32.1  
23.2  
23.2

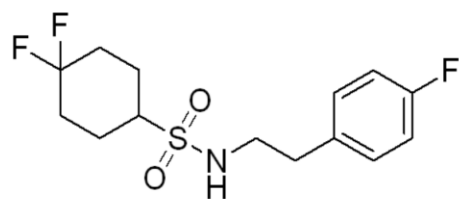

<sup>13</sup>C NMR (125 MHz, CDCl<sub>3</sub>)

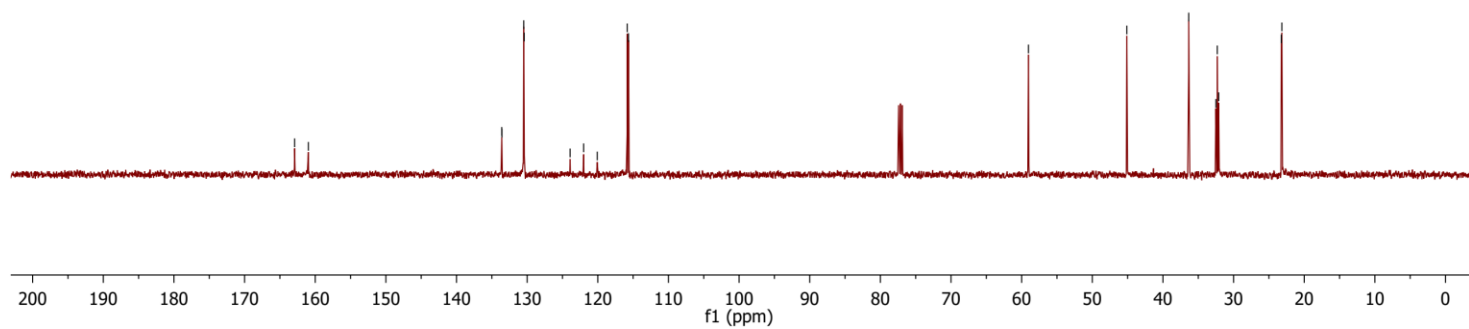

# **N-(4-Fluorophenethyl)adamantane-1-sulfonamide (5d)**

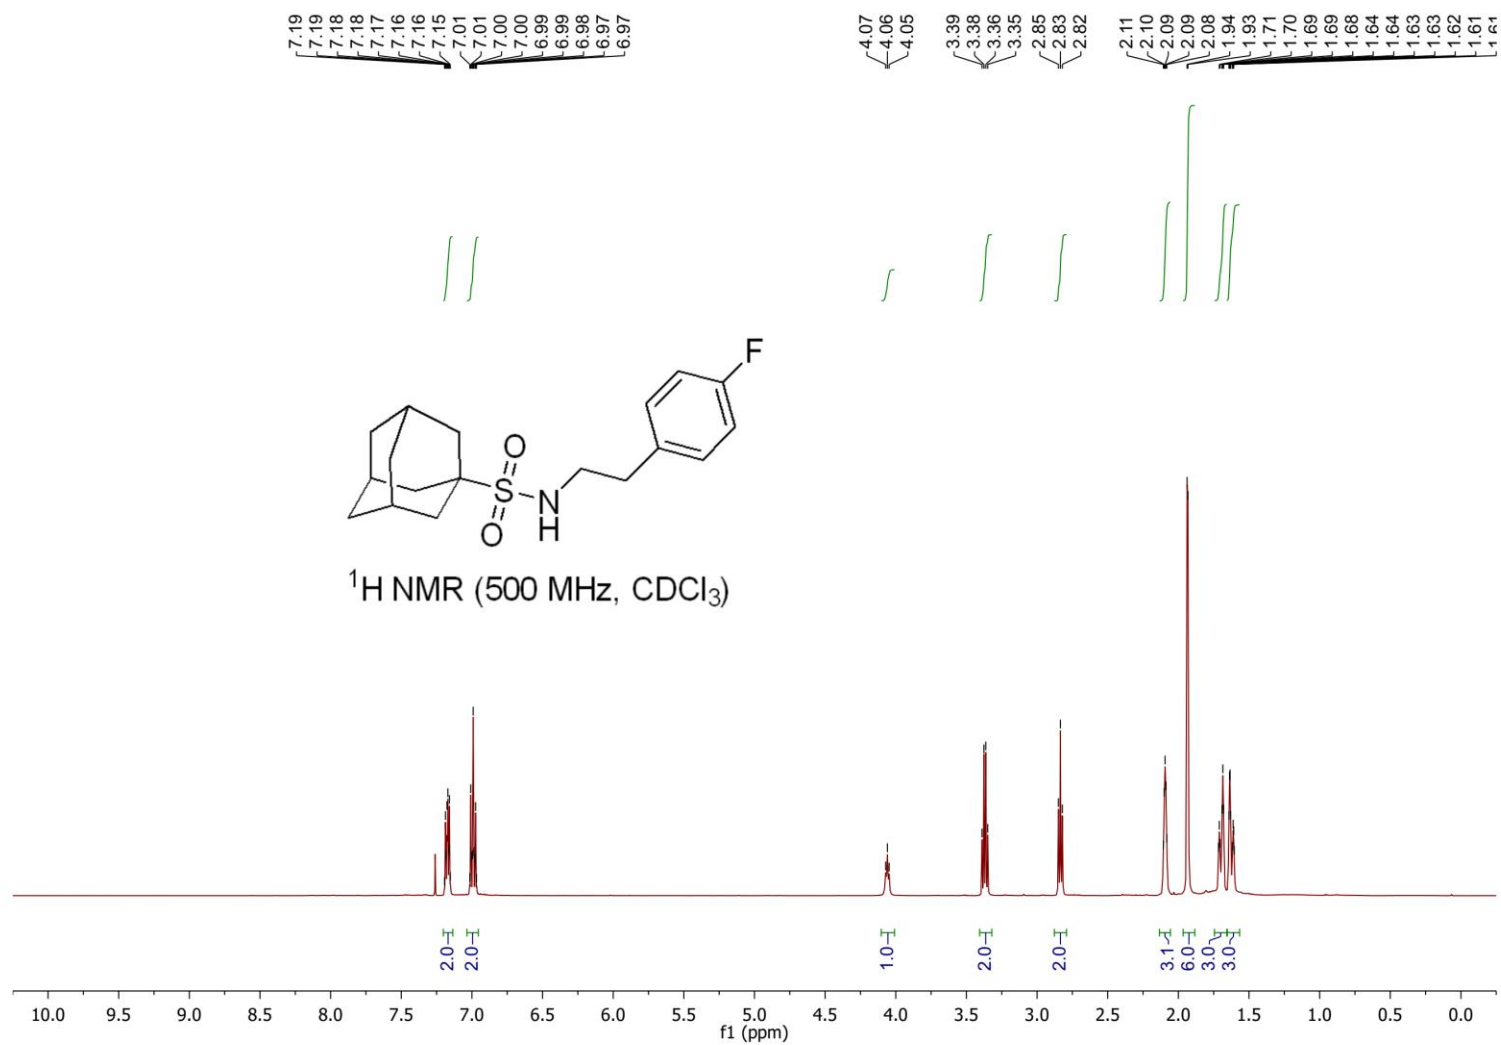

# ***N*-(4-Fluorophenethyl)adamantane-1-sulfonamide (5d)**

<sup>13</sup>C NMR (125 MHz, CDCl<sub>3</sub>)  
 162.8, 160.9, 134.0, 133.9, 130.5, 130.5, 115.7, 115.5, 61.2, 46.1, 37.0, 35.9, 35.8, 35.8, 28.2

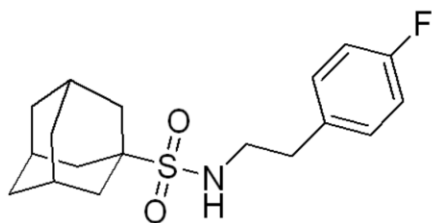

<sup>13</sup>C NMR (125 MHz, CDCl<sub>3</sub>)

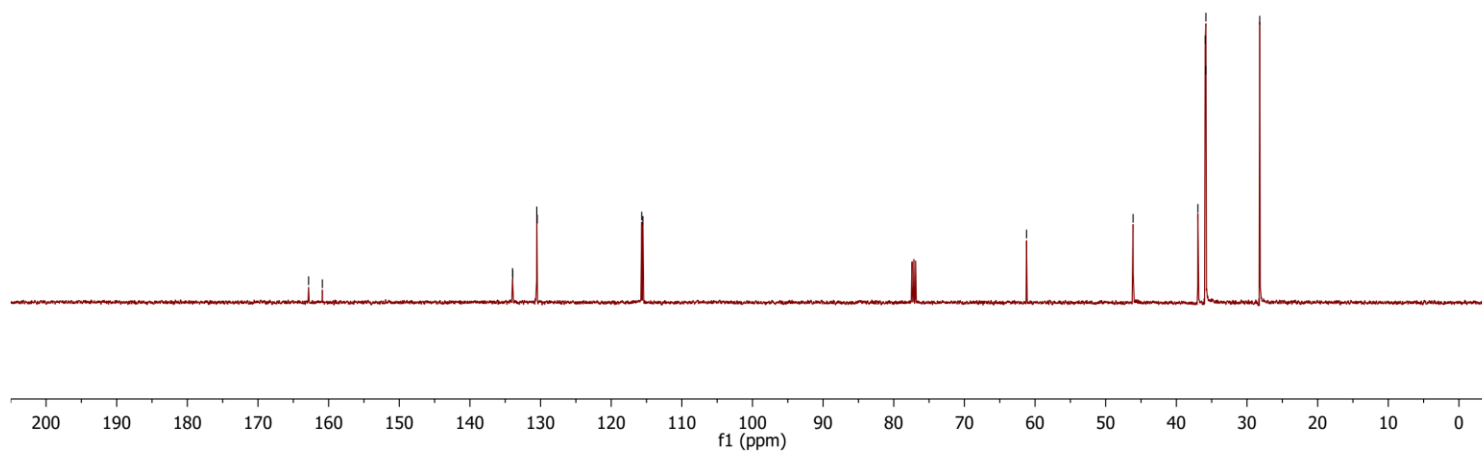

# 5-(2,5-Dimethylphenoxy)-N-(4-fluorophenethyl)-2-methylpentane-2-sulfonamide (5e)

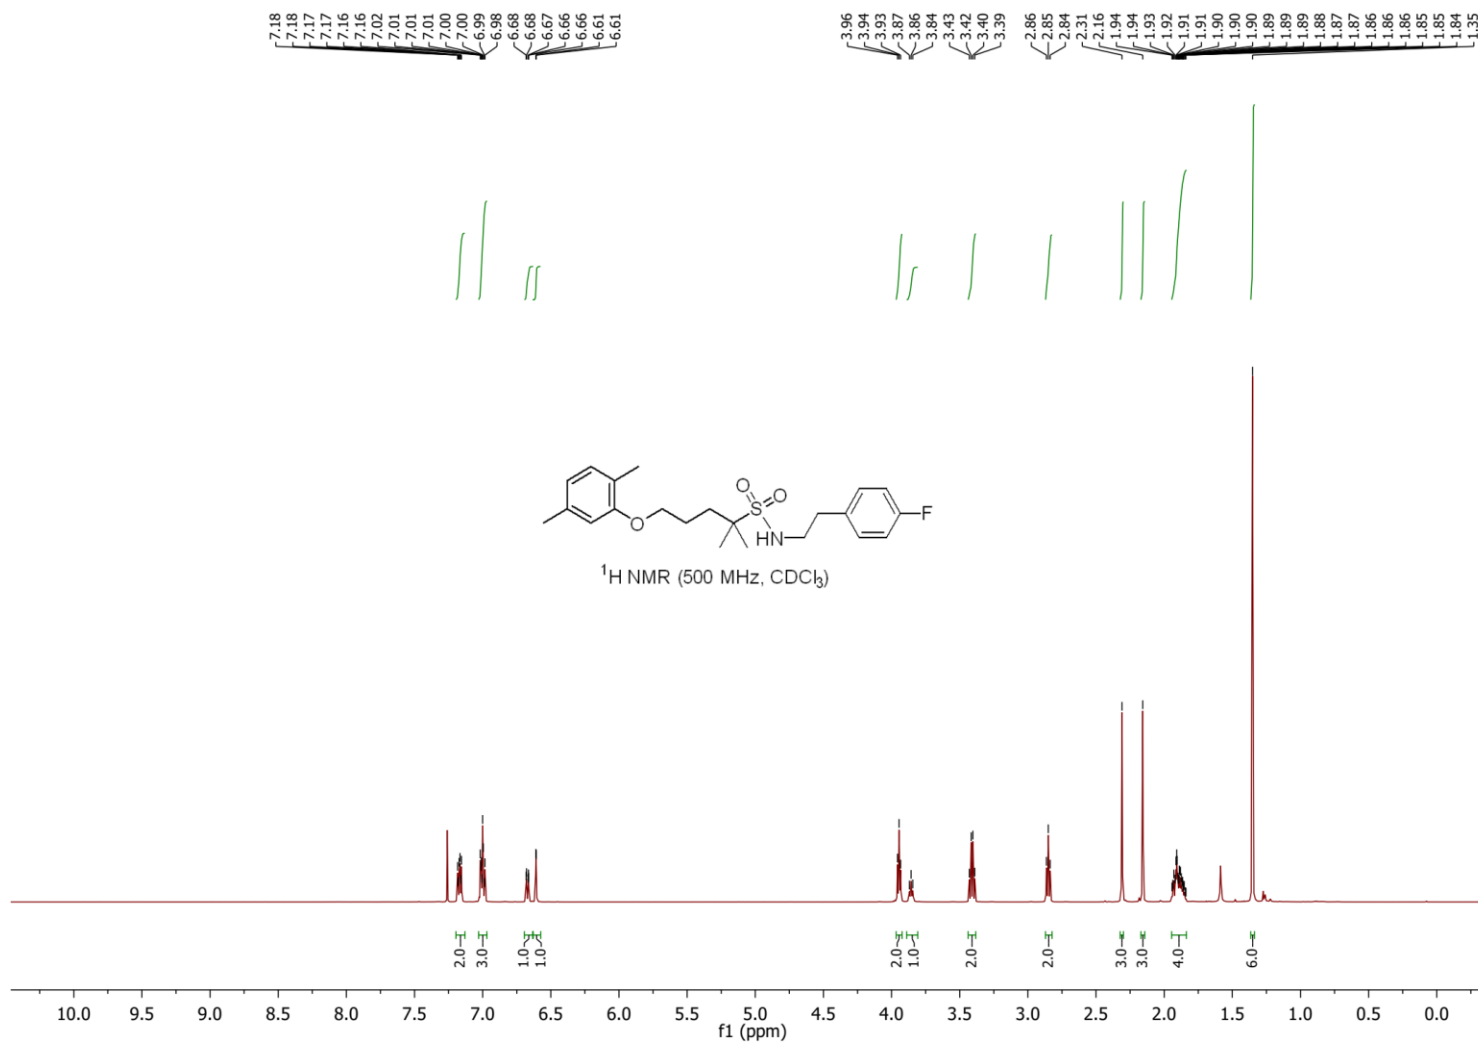

5-(2,5-dimethylphenoxy)-*N*-(4-fluorophenethyl)-2-methylpentane-2-sulfonamide (5e)

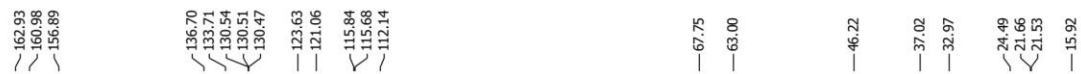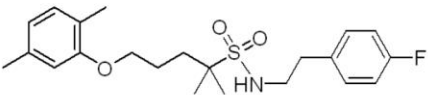

<sup>13</sup>C NMR (125 MHz, CDCl<sub>3</sub>)

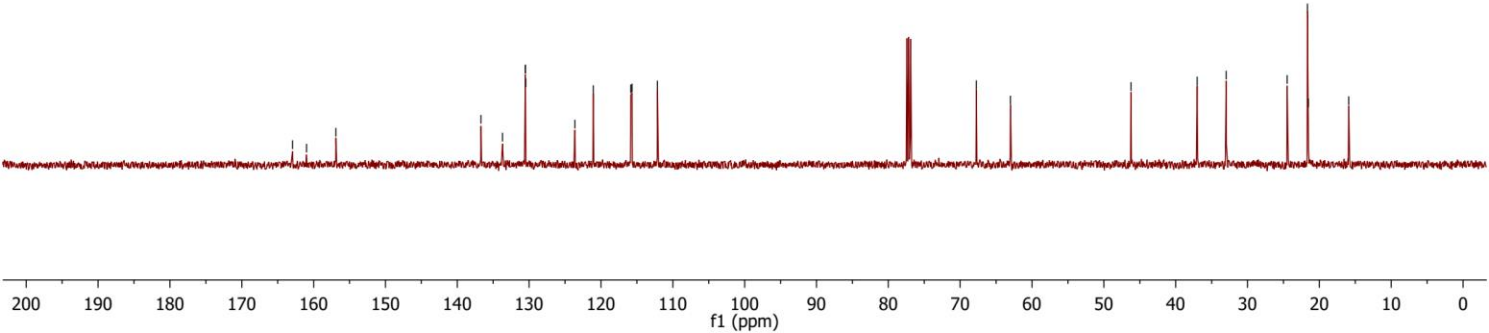

# Methyl (1*R*\*,2*S*\*)-2-(*N*-((*R*)-1-phenylethyl)sulfamoyl)cyclohexane-1-carboxylate (6a)

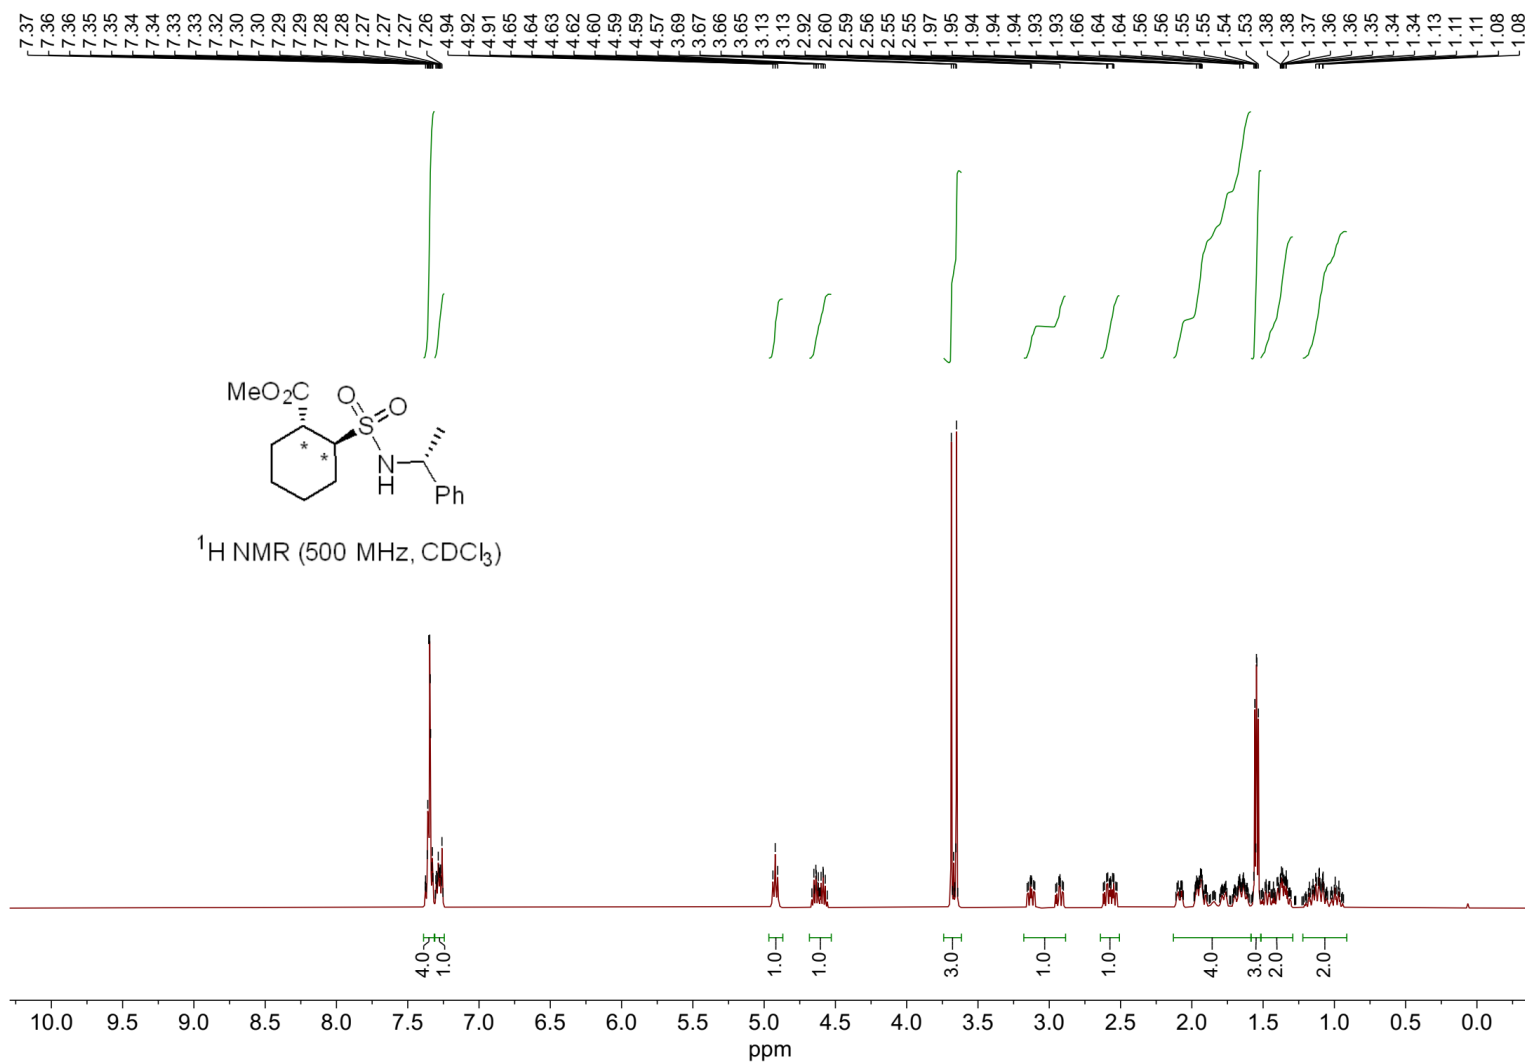

# Methyl (1*R*\*,2*S*\*)-2-(*N*-((*R*)-1-phenylethyl)sulfamoyl)cyclohexane-1-carboxylate (6a)

175.08  
174.79

143.02  
128.91  
128.88  
128.85  
127.90  
127.78  
126.40  
126.34  
126.28

62.84  
62.02  
54.06  
53.93  
52.23  
44.03  
43.55  
29.79  
29.75  
25.83  
25.52  
24.46  
24.39  
24.31  
24.17  
24.08

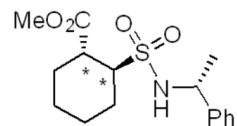

<sup>13</sup>C NMR (75 MHz, CDCl<sub>3</sub>)

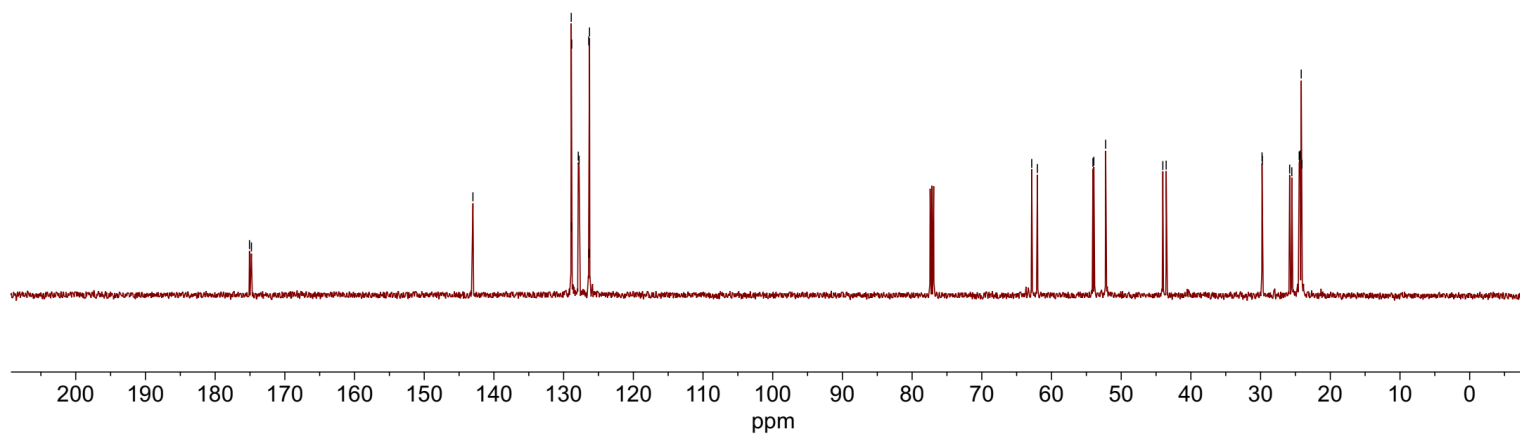

**(3*S*,5*S*,7*S*)-*N*-((*R*)-1-Phenylethyl)adamantane-1-sulfonamide (6b)**

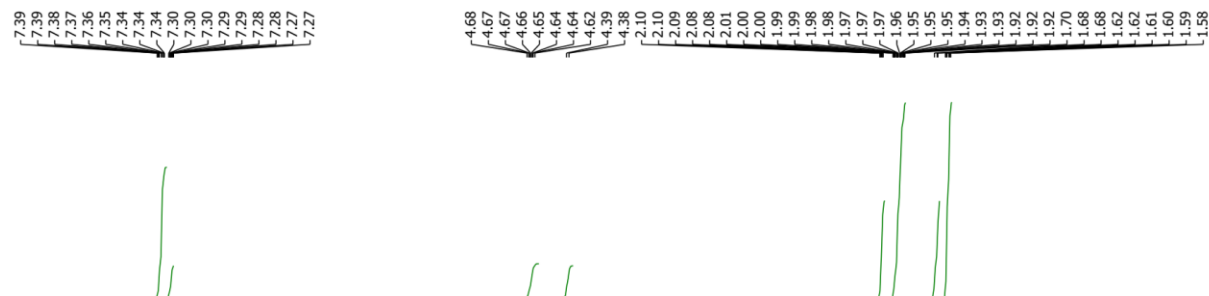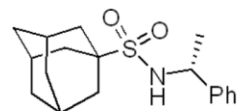

<sup>1</sup>H NMR (500 MHz, CDCl<sub>3</sub>)

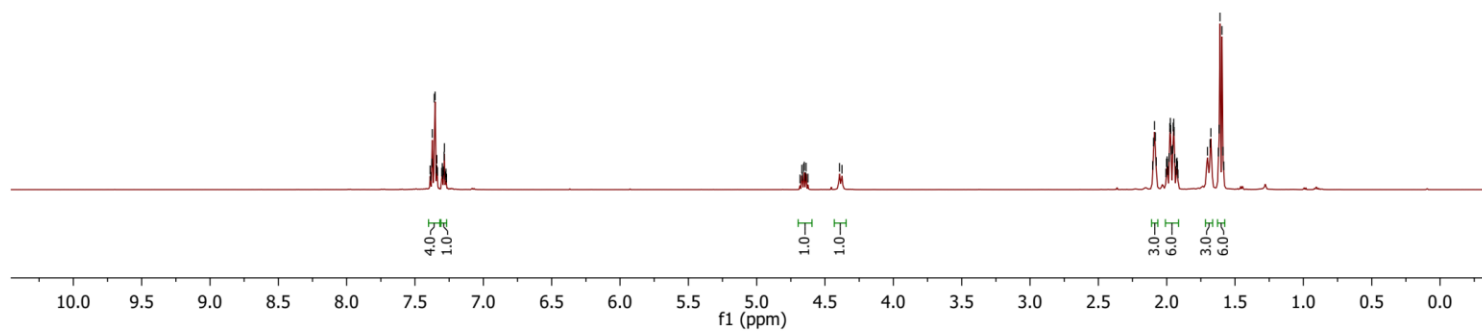



**(3*S*,5*S*,7*S*)-*N*-((*R*)-1-Phenylethyl)adamantane-1-sulfonamide (6b)**

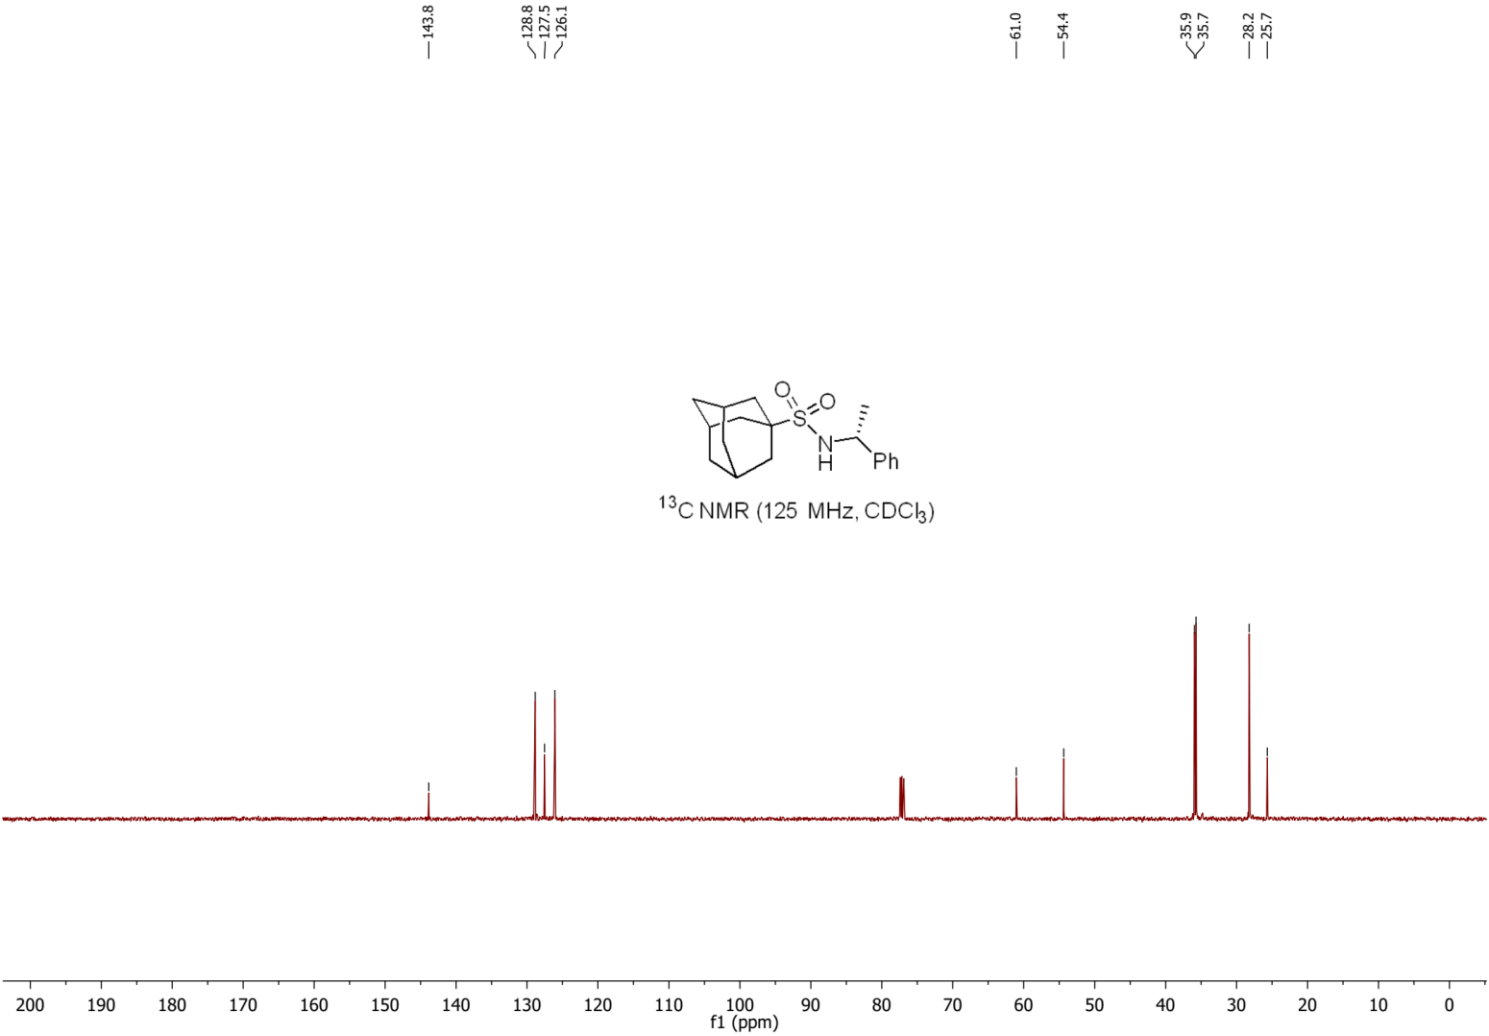

# ***N,N*-Dibenzyl-4-(5-methylthiophen-2-yl)-4-oxobutane-1-sulfonamide (7a)**

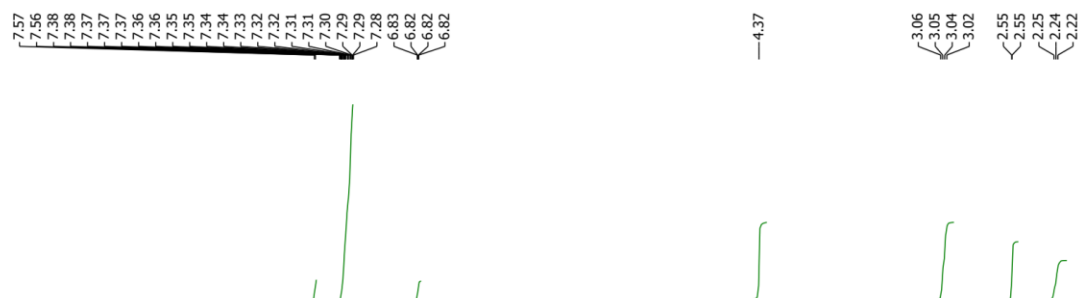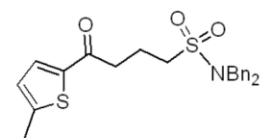

<sup>1</sup>H NMR (500 MHz, CDCl<sub>3</sub>)

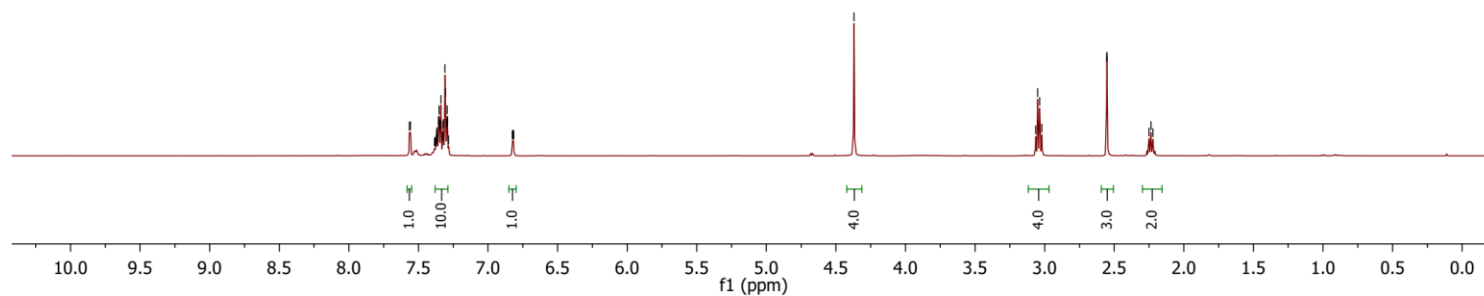

# ***N,N*-Dibenzyl-4-(5-methylthiophen-2-yl)-4-oxobutane-1-sulfonamide (7a)**

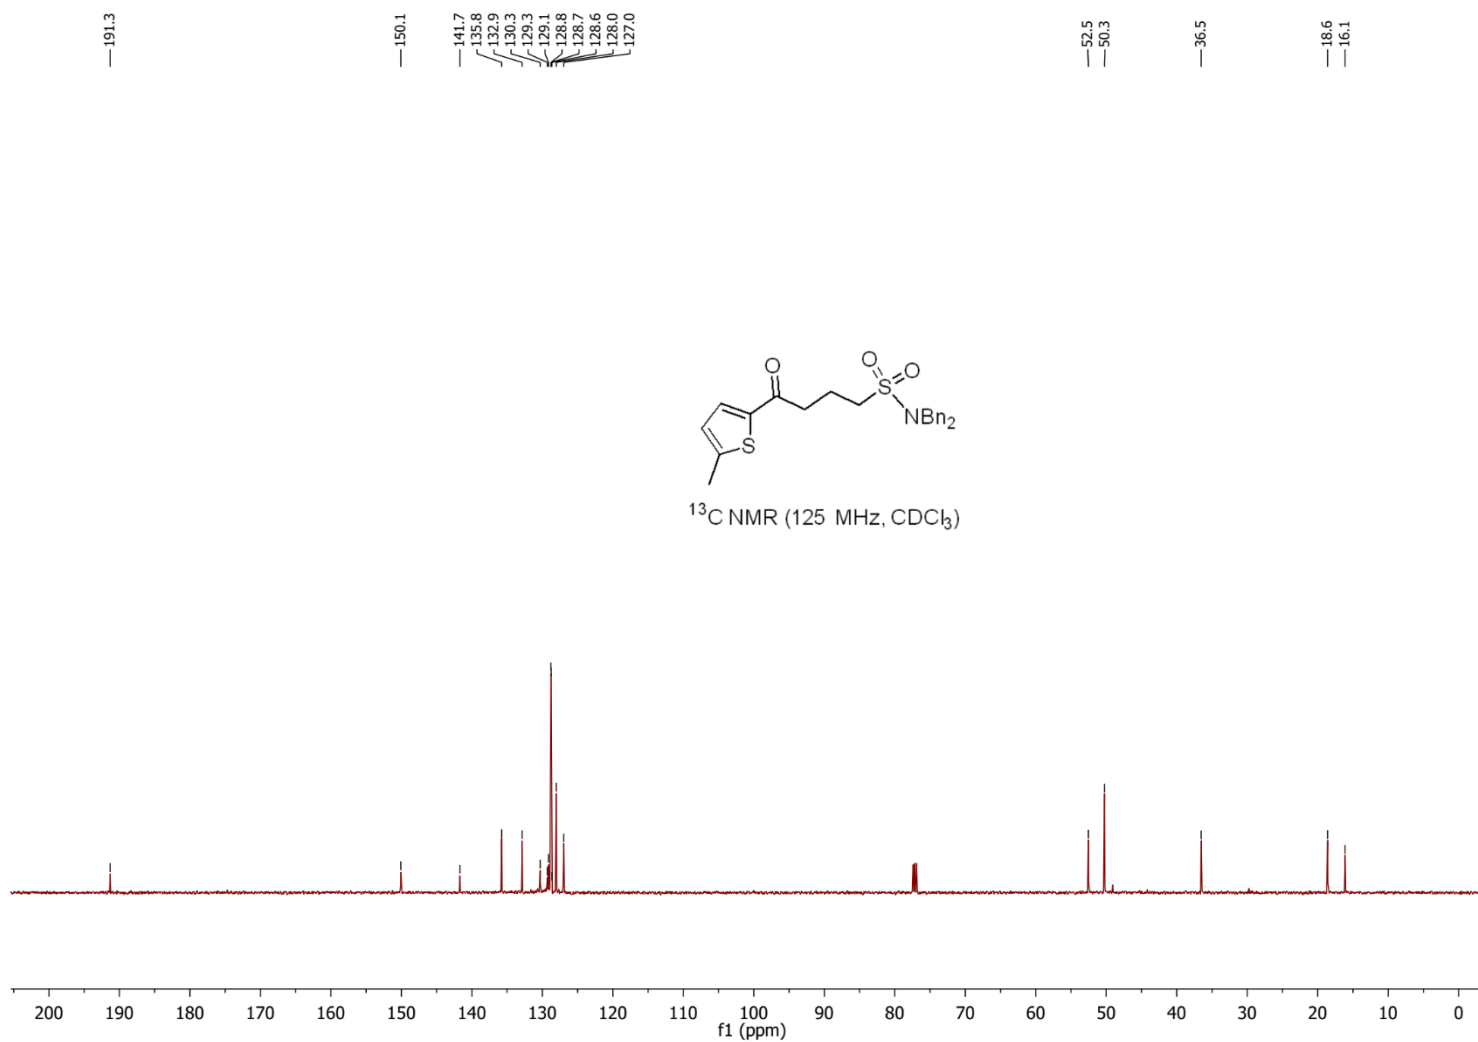

*N,N*-Dibenzylcyclohexanesulfonamide (7b)

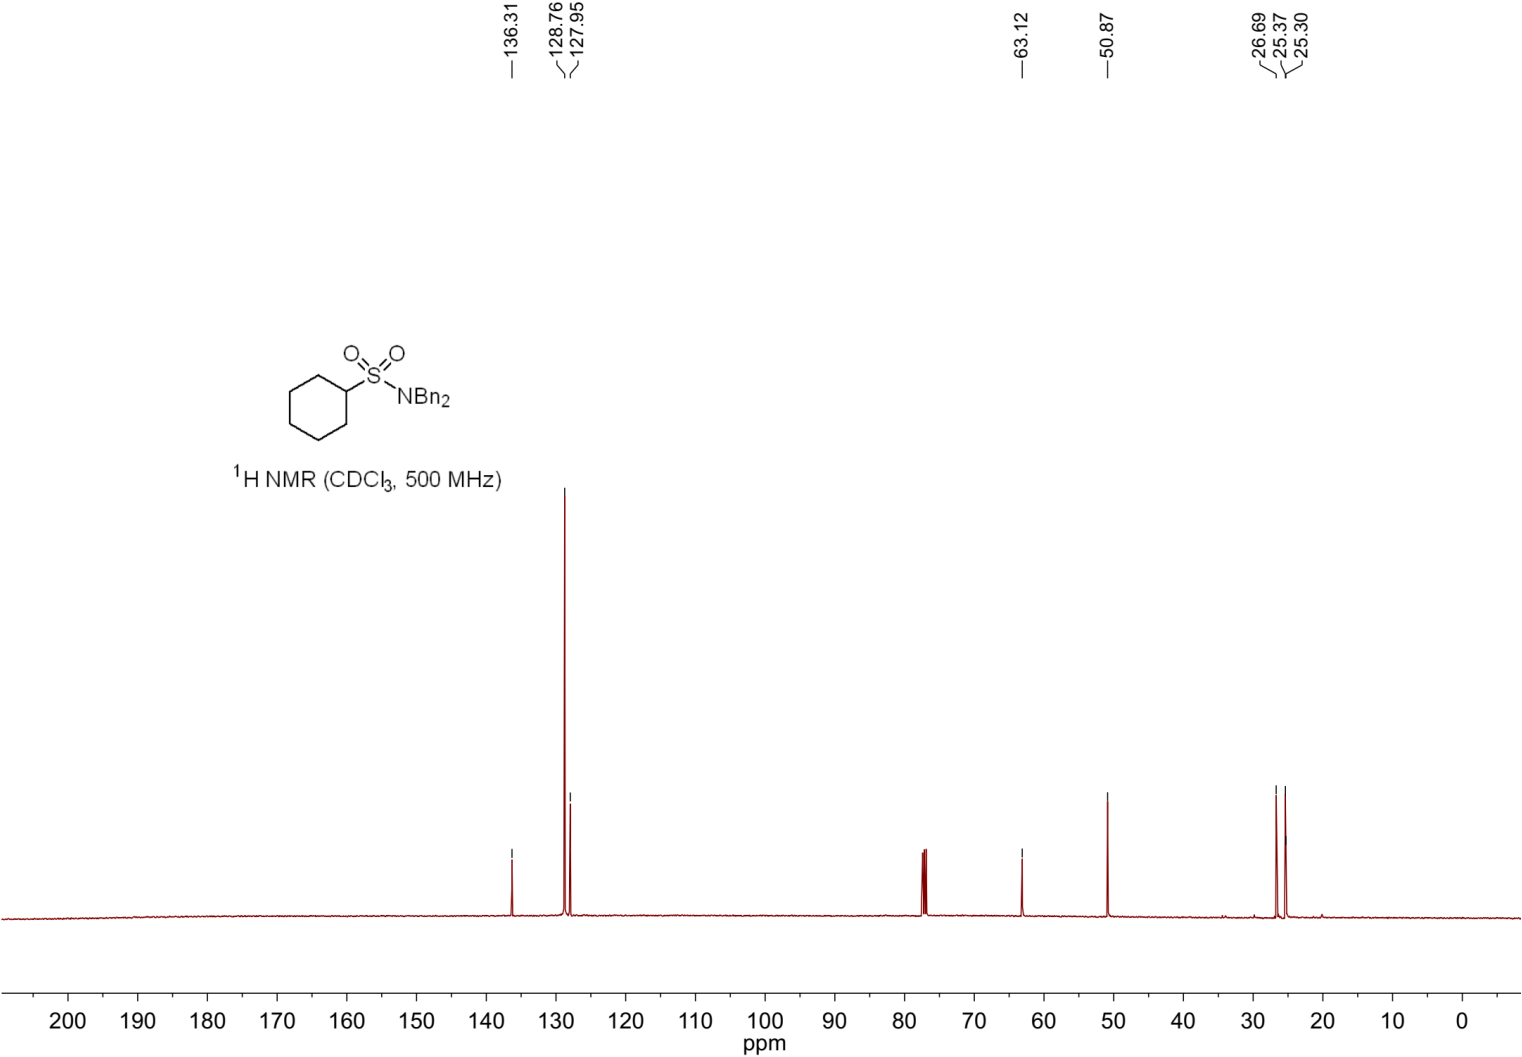

## N,N-Dibenzylcyclohexanesulfonamide (7b)

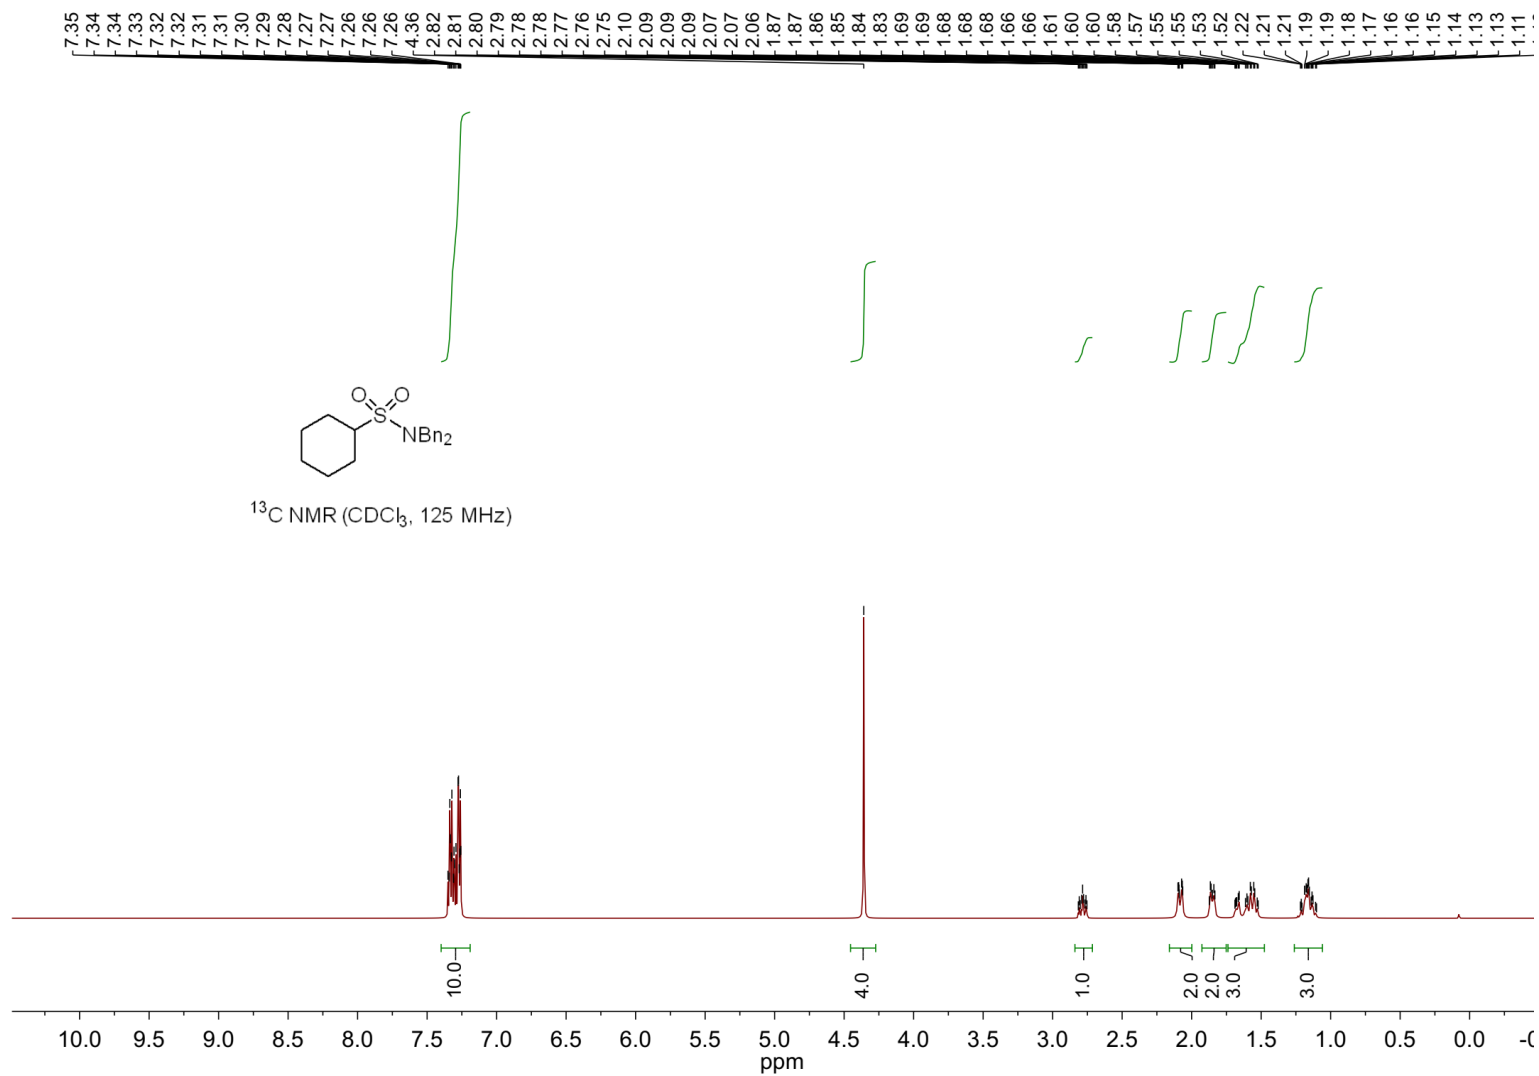

# *N,N*-Dibenzyltetrahydro-2*H*-pyran-4-sulfonamide (7c)

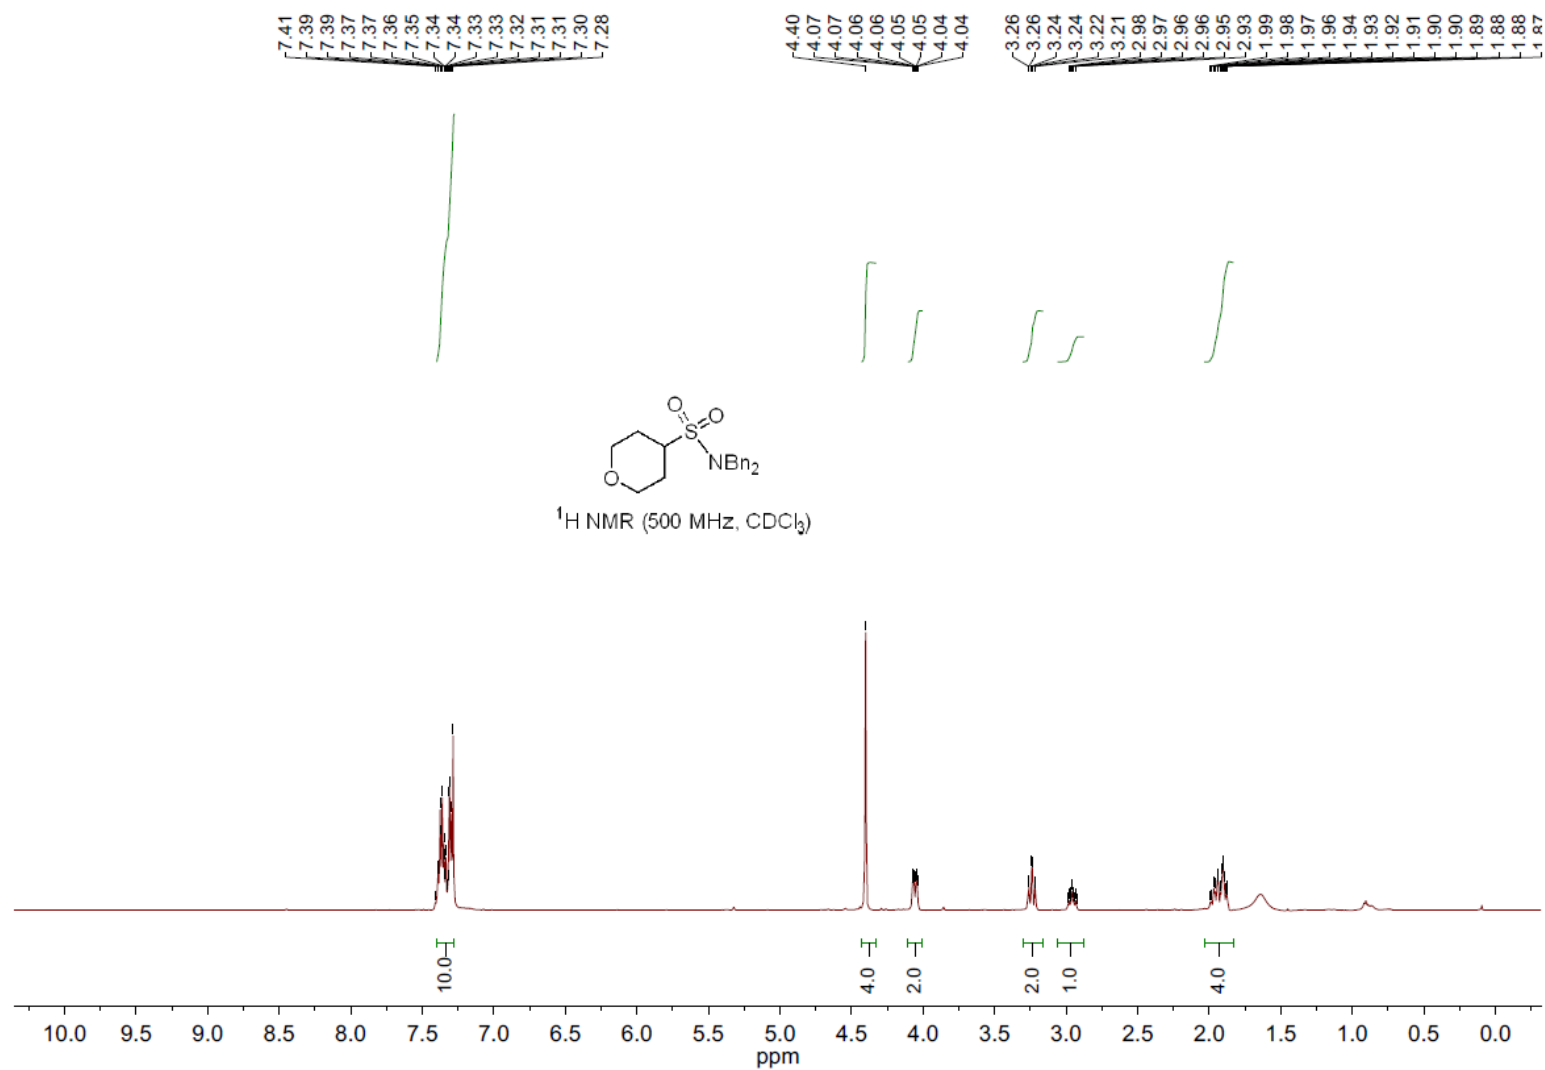

## *N,N*-Dibenzyltetrahydro-2*H*-pyran-4-sulfonamide (7c)

—136.1  
128.9  
128.8  
128.2

—66.8

—60.2

—51.0

—26.9

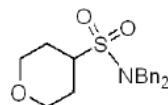

<sup>13</sup>C NMR (125 MHz, CDCl<sub>3</sub>)

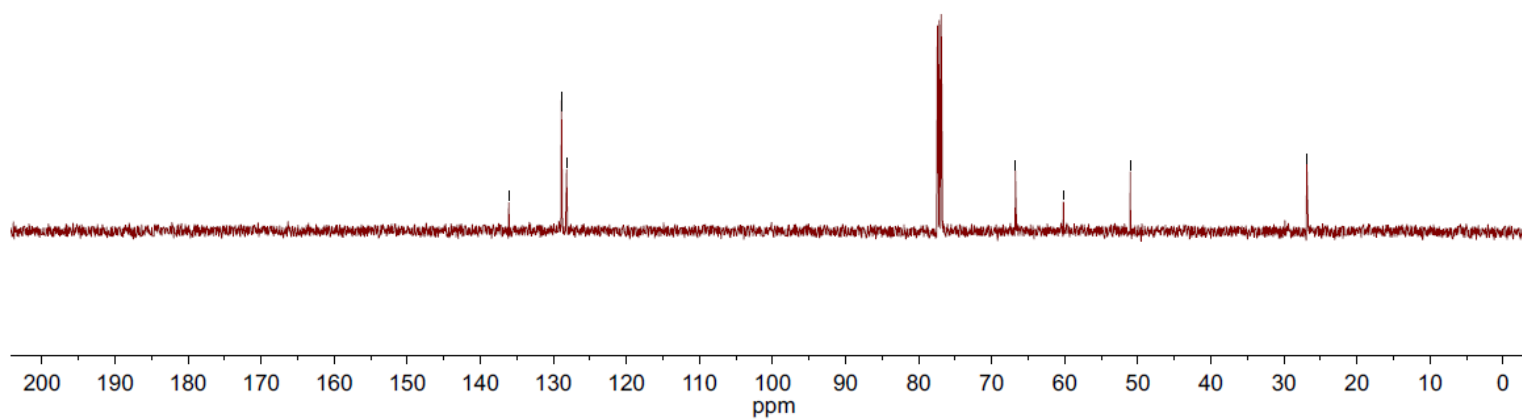

# ***N*-(*p*-Tolyl)cyclohexanesulfonamide (8a)**

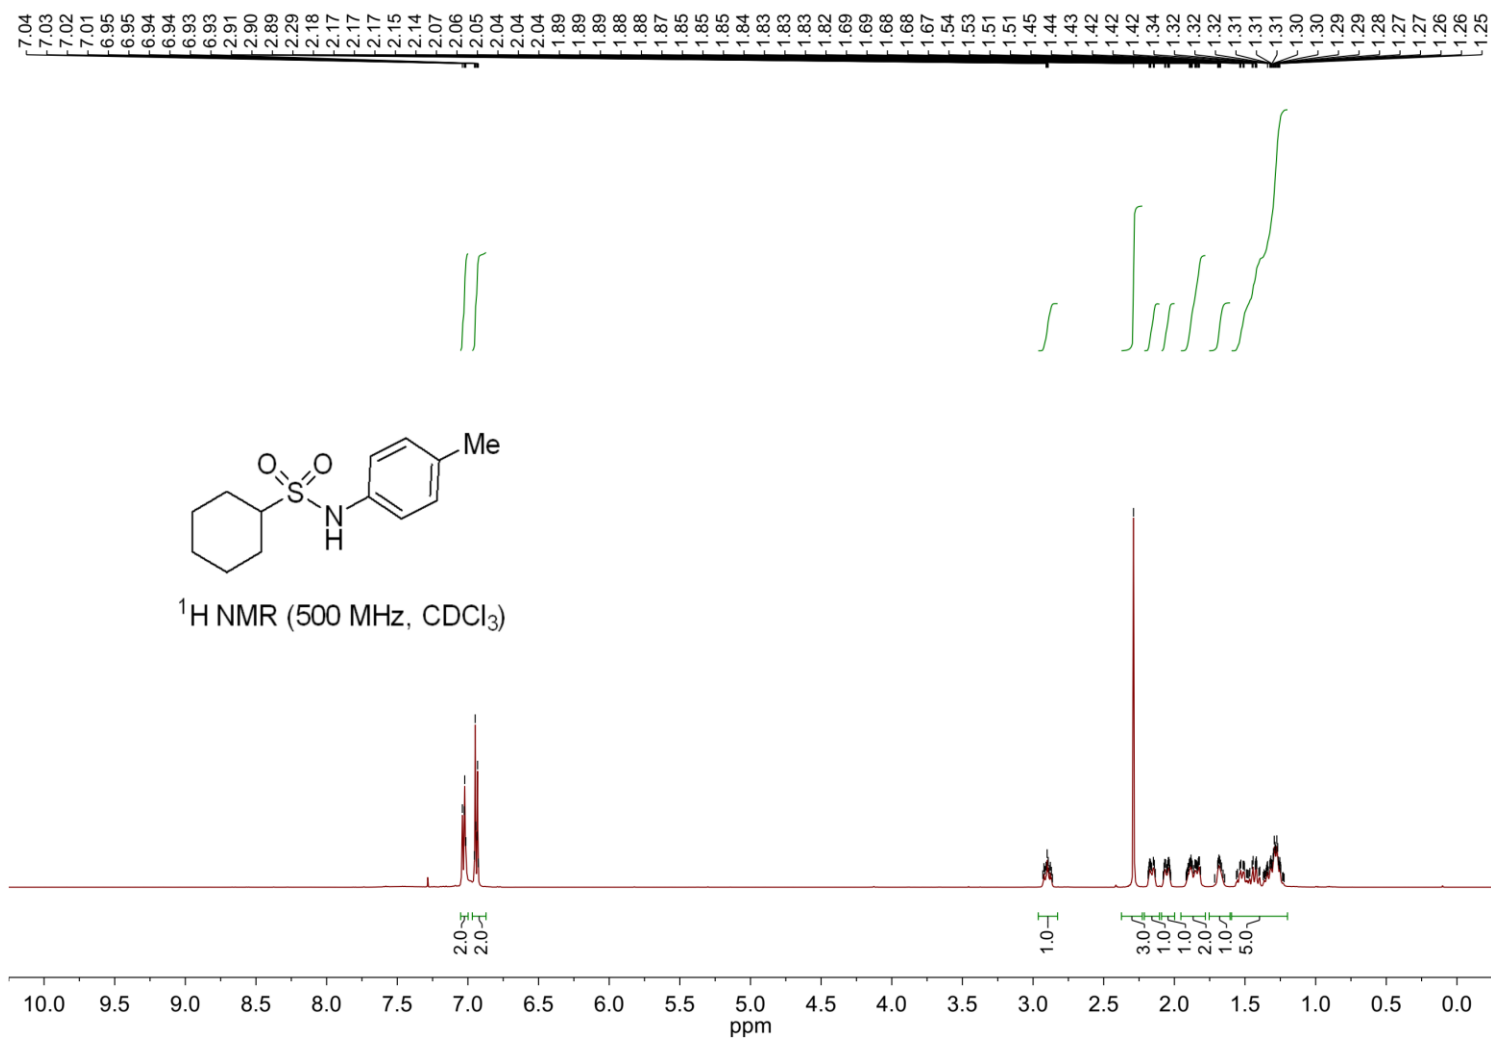



# ***N*-(*p*-Tolyl)cyclohexanesulfonamide (8a)**

— 139.4 — 132.3 — 129.9 — 118.6 — 62.7 — 26.6 26.4 25.6 25.2 25.1 20.7

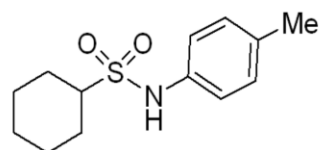

<sup>13</sup>C NMR (125 MHz, CDCl<sub>3</sub>)

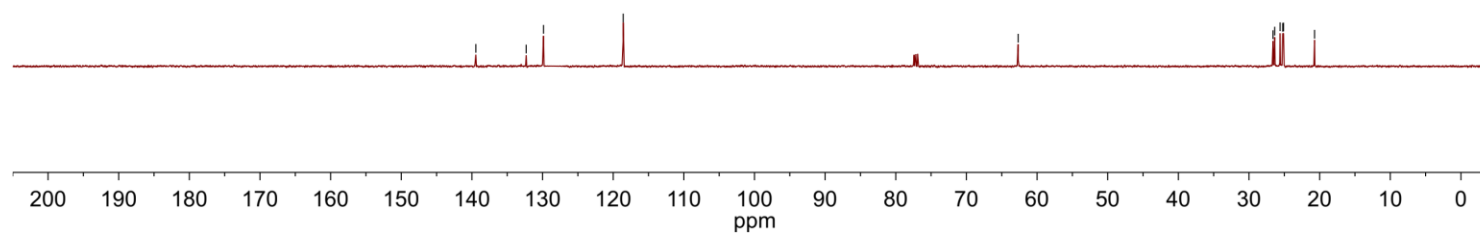

# ***N*-(3,5-Dimethylphenyl)cyclohexanesulfonamide (8b)**

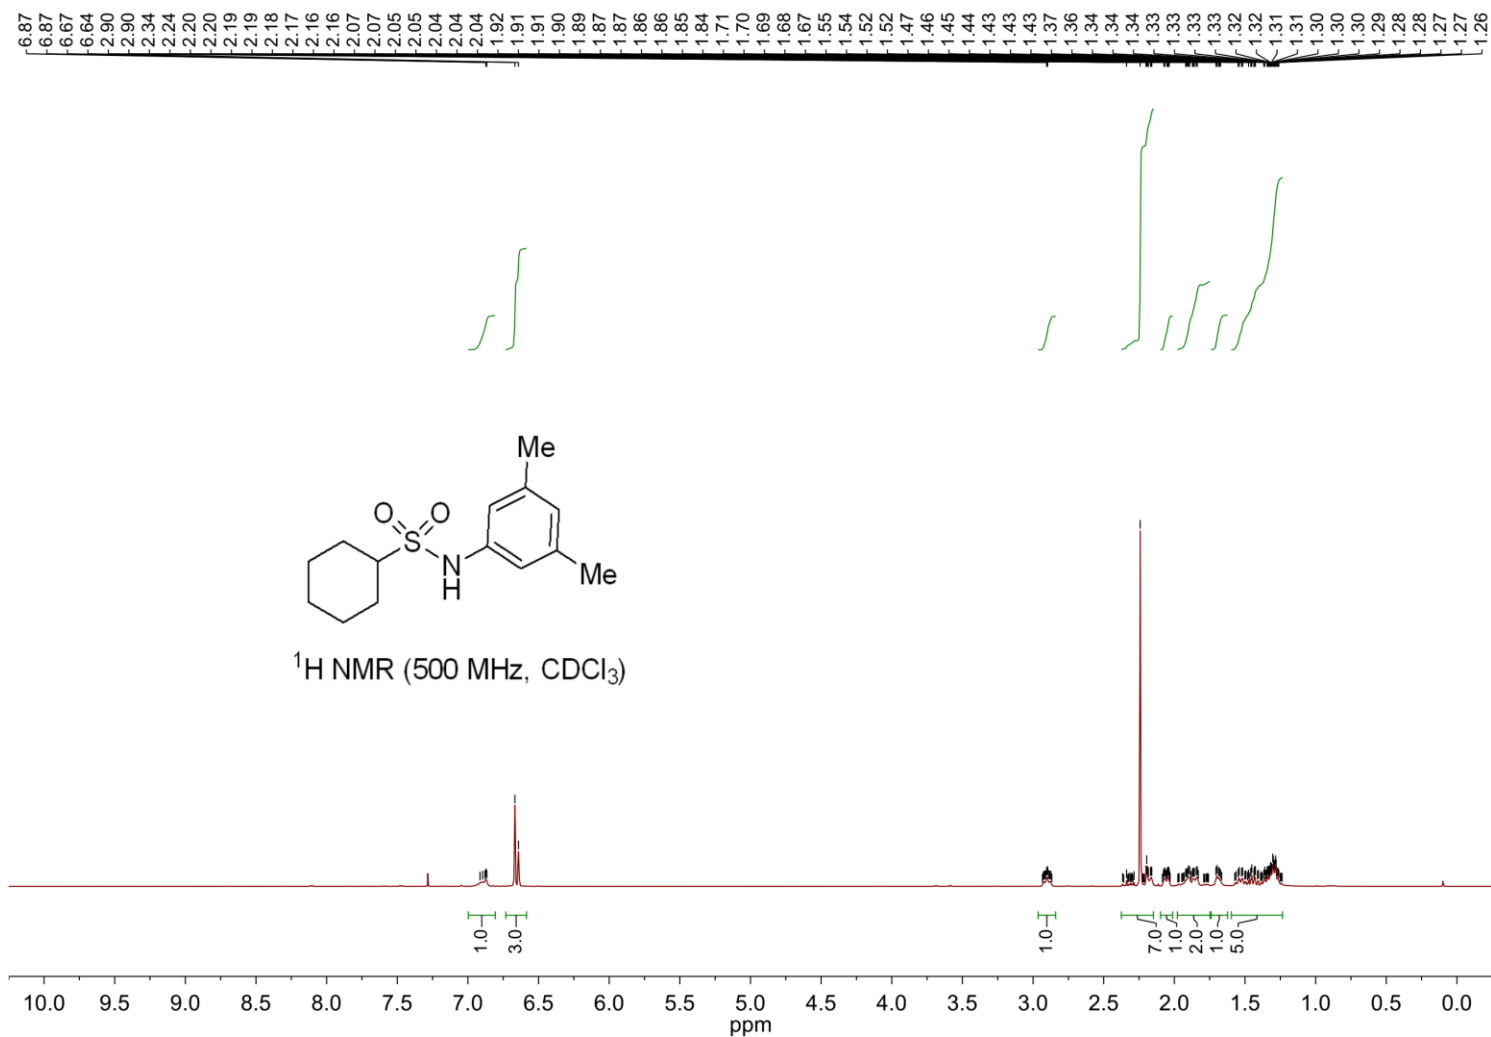

# ***N*-(3,5-Dimethylphenyl)cyclohexanesulfonamide (8b)**

—141.9  
—139.2  
—124.6  
—115.9  
—62.8  
26.6  
26.4  
25.6  
25.3  
25.1  
21.4

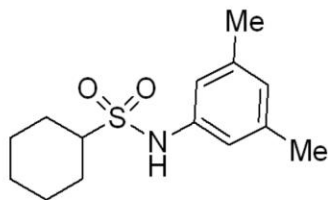

<sup>13</sup>C NMR (125 MHz, CDCl<sub>3</sub>)

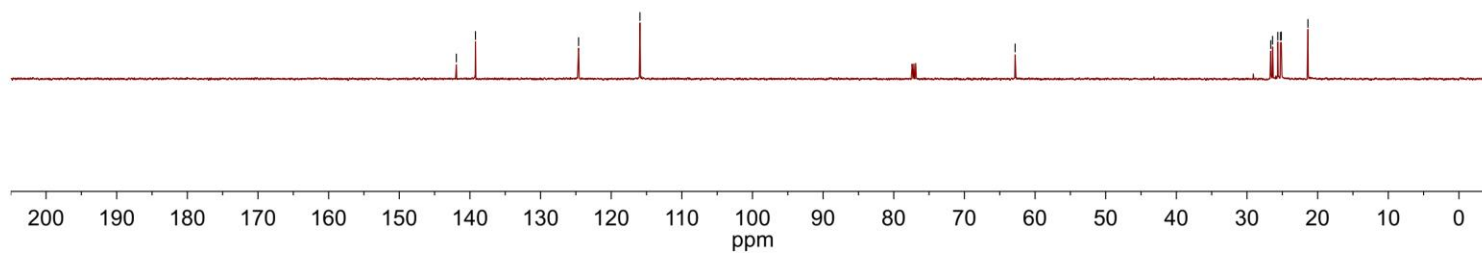

# ***N*-(3,4,5-Trimethylphenyl)cyclohexanesulfonamide (8c)**

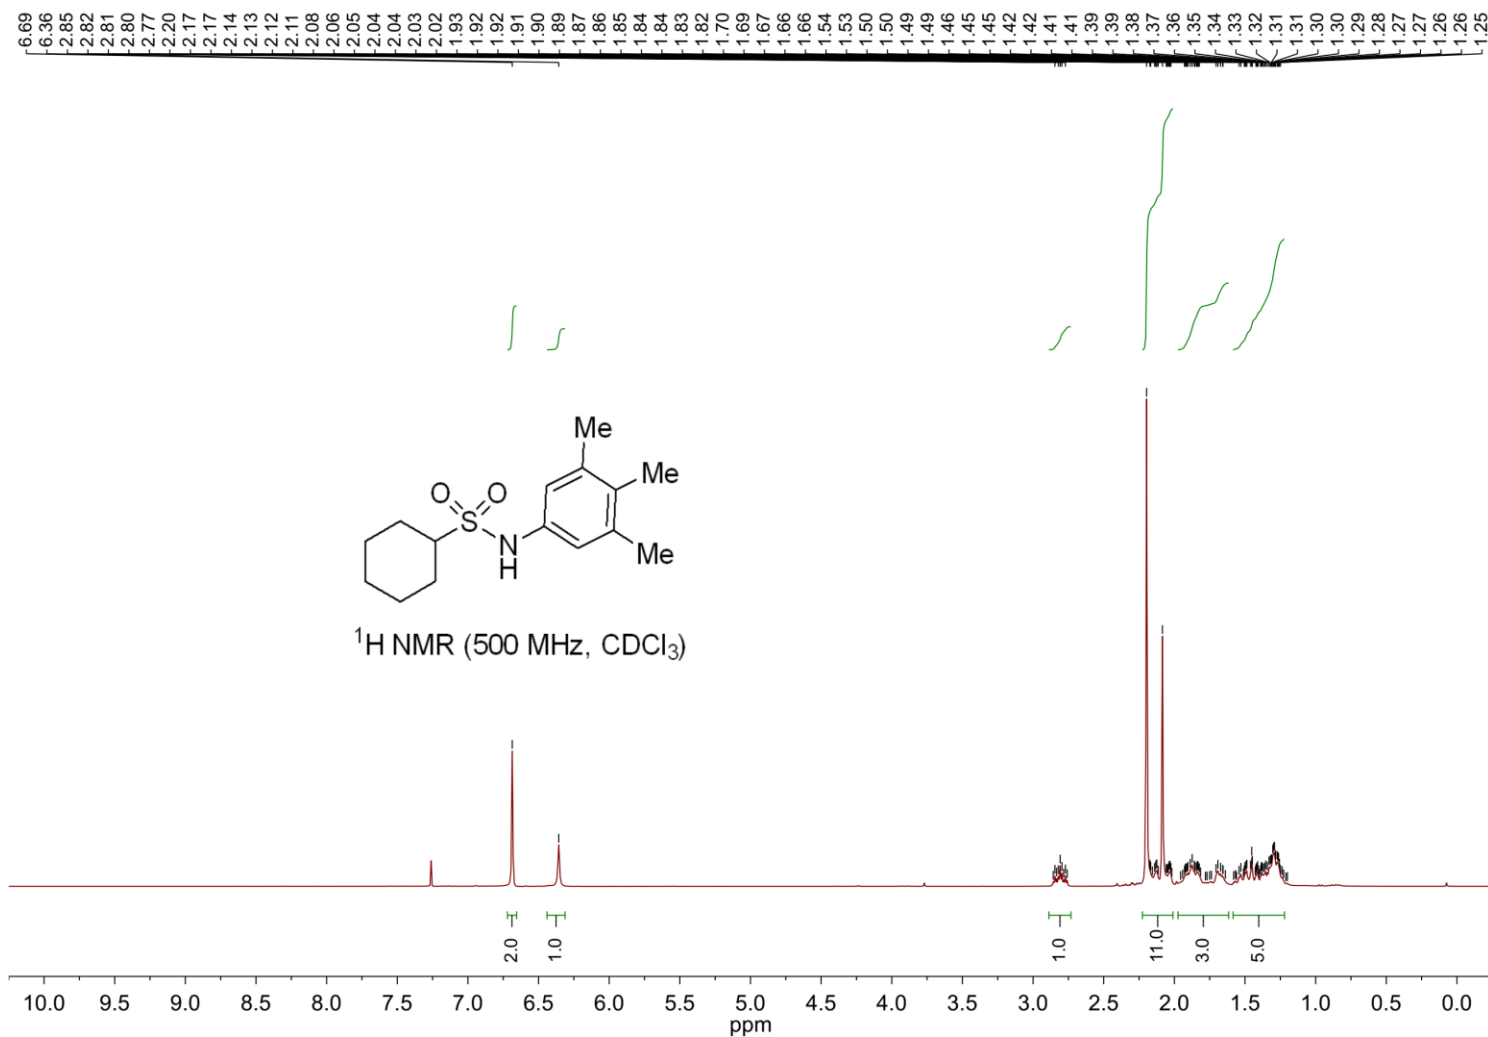

# ***N*-(3,4,5-Trimethylphenyl)cyclohexanesulfonamide (8c)**

$\sim$ 138.9  
 $\sim$ 137.5  
 —129.5  
 —117.8  
 —62.7  
 26.6  
 26.4  
 25.6  
 25.3  
 25.1  
 20.6  
 —14.8

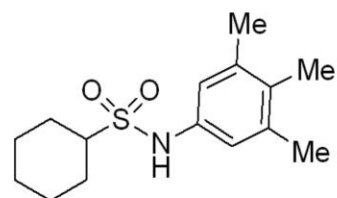

$^{13}\text{C}$  NMR (125 MHz,  $\text{CDCl}_3$ )

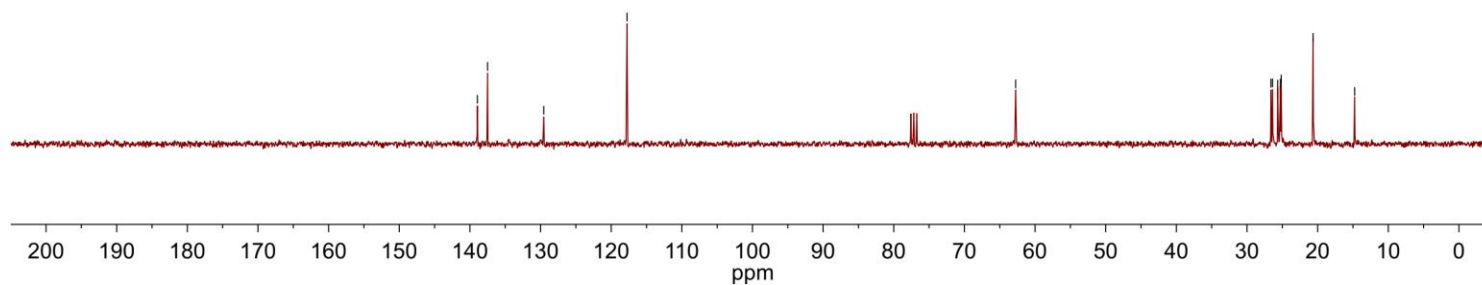

# **N-(4-Methoxyphenyl)cyclohexanesulfonamide (8d)**

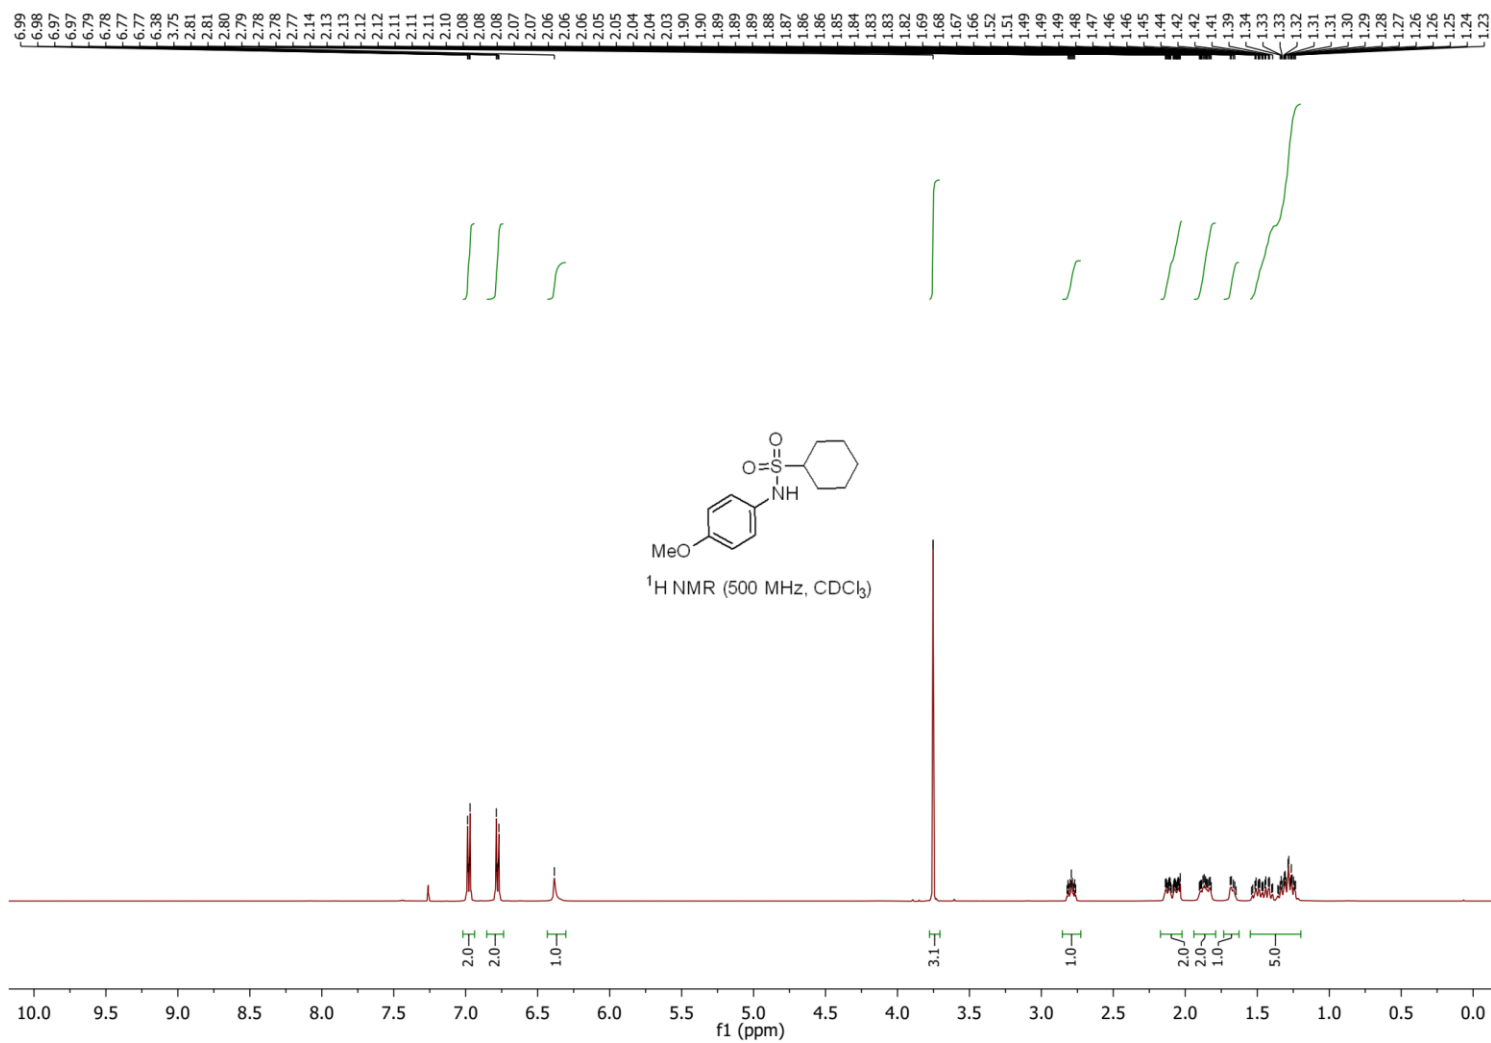

# ***N*-(4-Methoxyphenyl)cyclohexanesulfonamide (8d)**

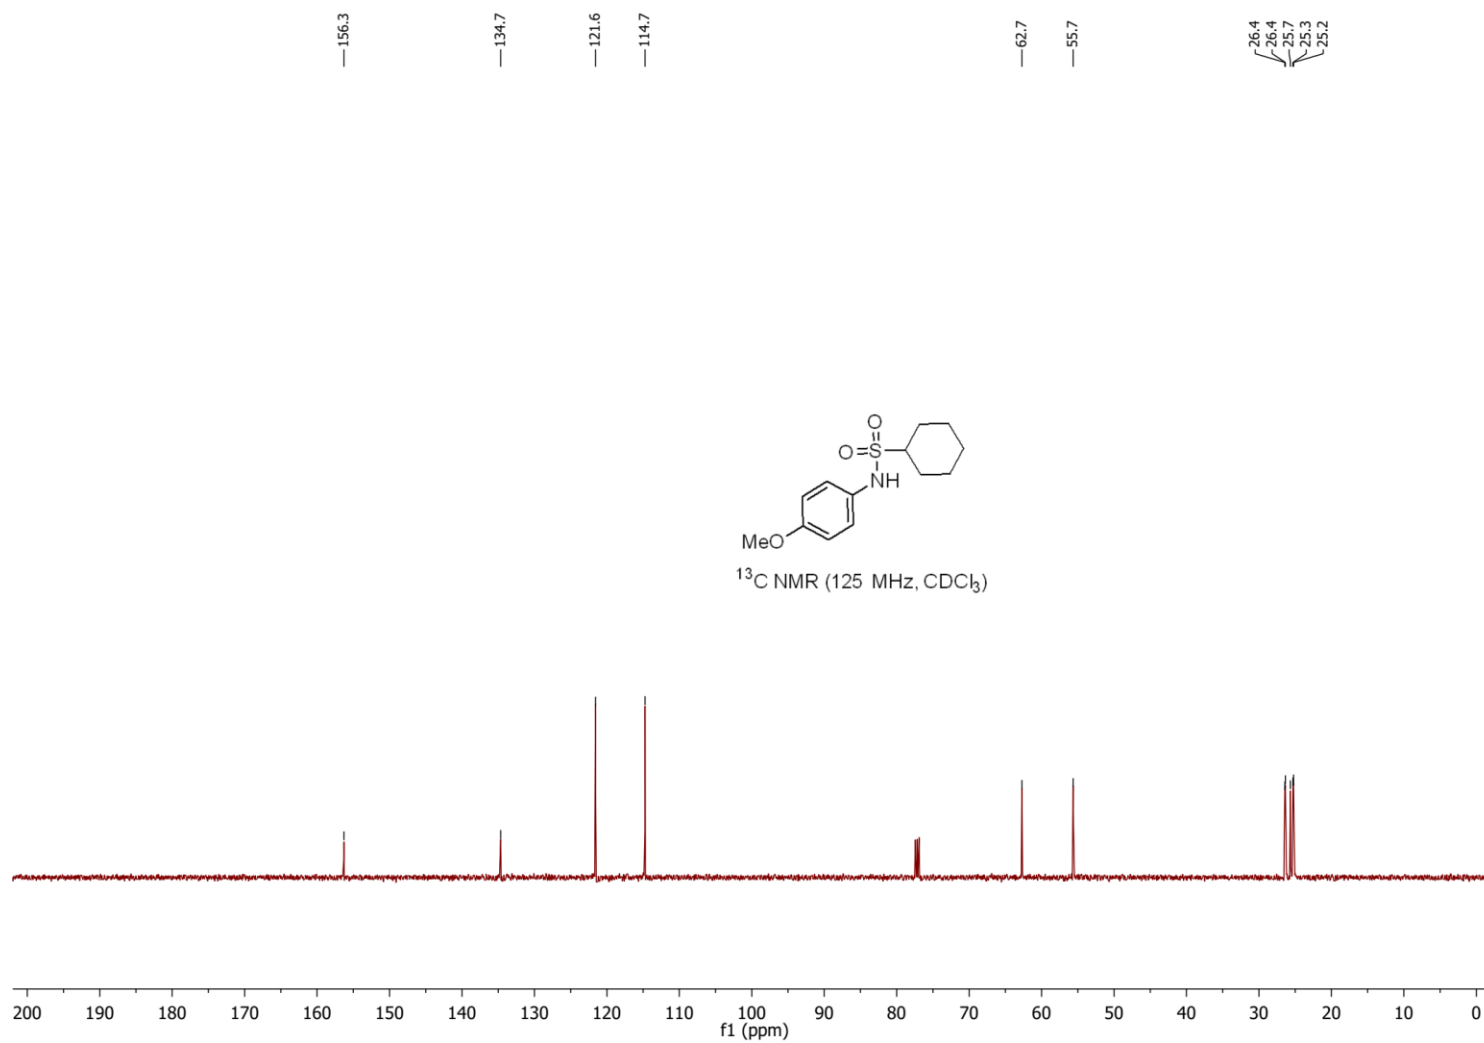

# ***N*-(2-Methoxyphenyl)cyclohexanesulfonamide (8e)**

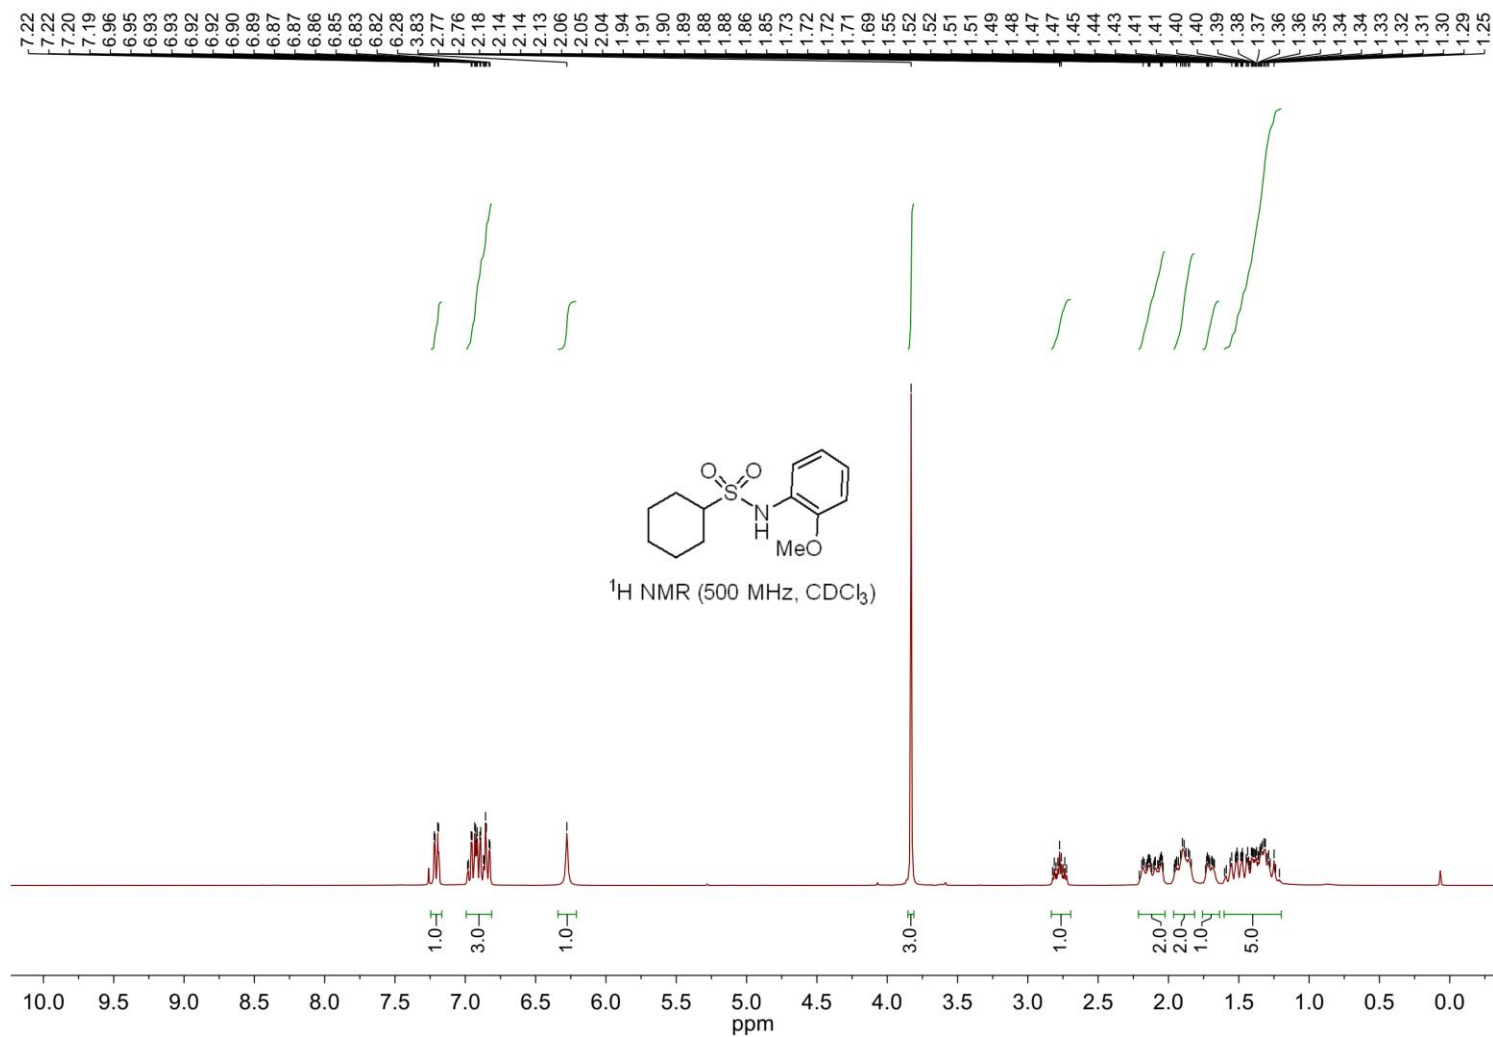



***N*-(2-Methoxyphenyl)cyclohexanesulfonamide (8e)**

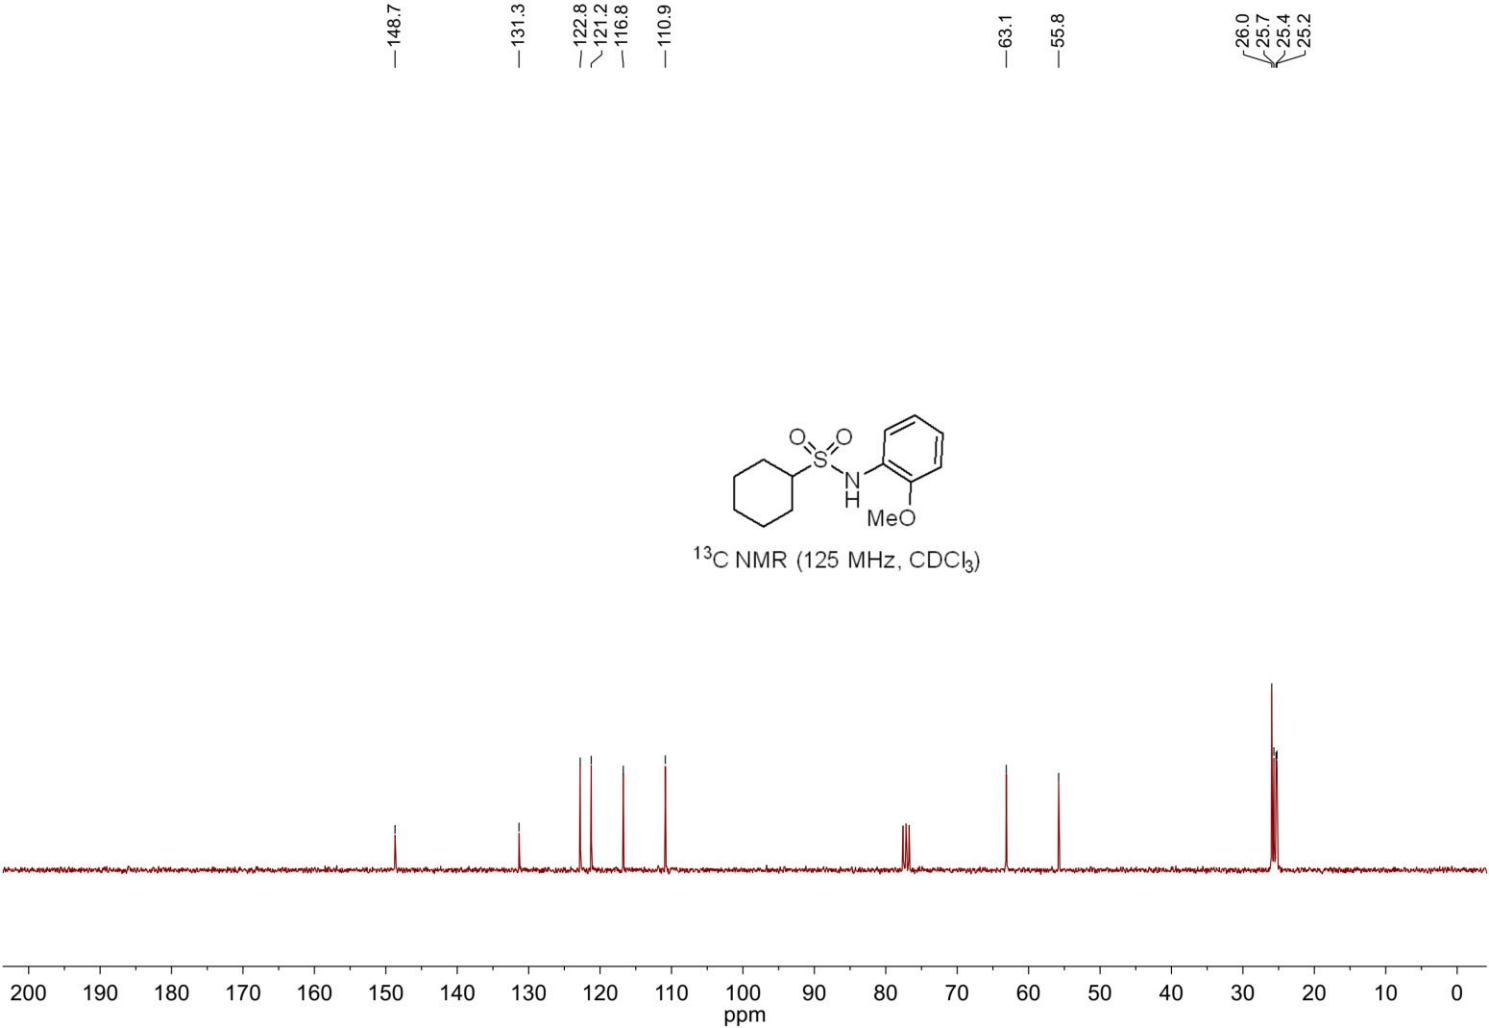

# ***N*-(4-(Trifluoromethoxy)phenyl)cyclohexanesulfonamide (8f)**

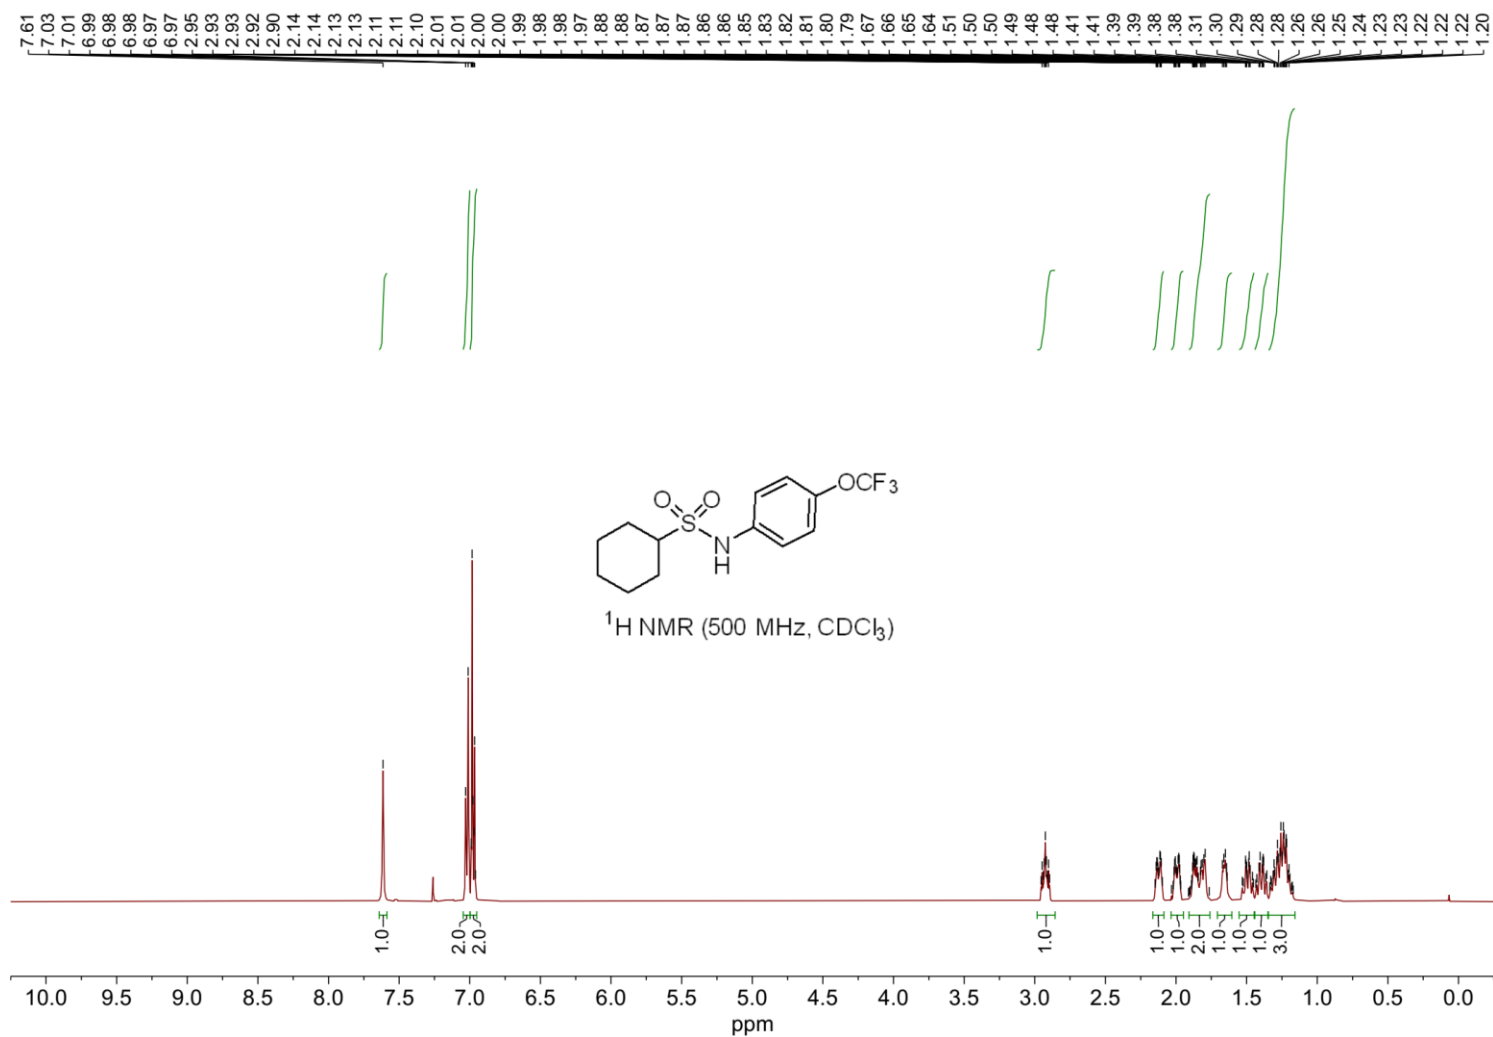

# ***N*-(4-(Trifluoromethoxy)phenyl)cyclohexanesulfonamide (8f)**

<sup>13</sup>C NMR (125 MHz, CDCl<sub>3</sub>)  
 144.4, 141.1, 123.8, 122.3, 121.6, 119.6, 118.7, 117.6, 62.9, 26.7, 26.4, 25.5, 25.2, 25.1

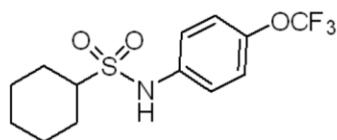

<sup>13</sup>C NMR (125 MHz, CDCl<sub>3</sub>)

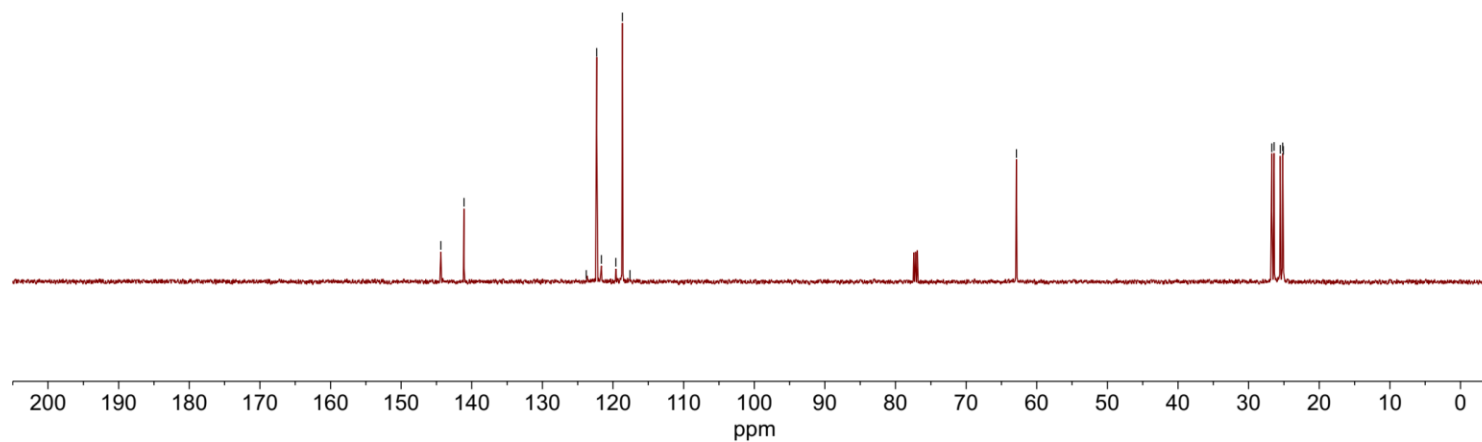

# **N-(3-(Methylthio)phenyl)cyclohexanesulfonamide (8g)**

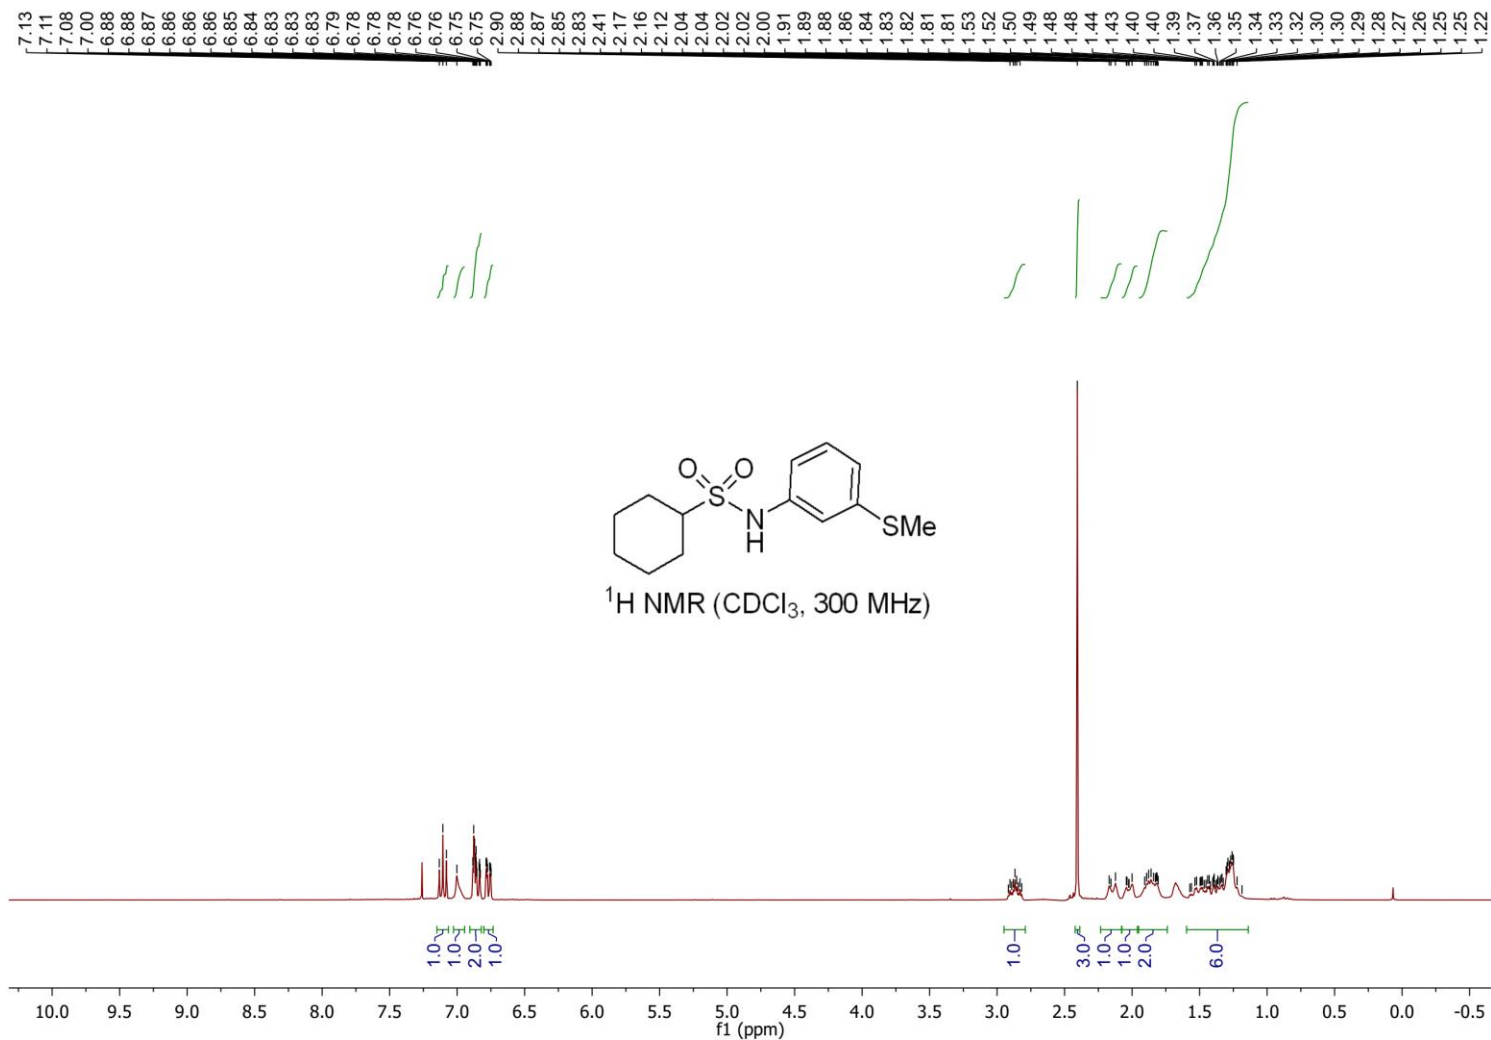

## *N*-(3-(Methylthio)phenyl)cyclohexanesulfonamide (8g)

—142.7  
—140.1  
—129.7  
—120.7  
—115.6  
—114.5  
—63.0  
26.6  
26.3  
25.6  
25.2  
25.2  
—15.6

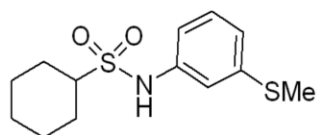

$^{13}\text{C}$  NMR ( $\text{CDCl}_3$ , 75 MHz)

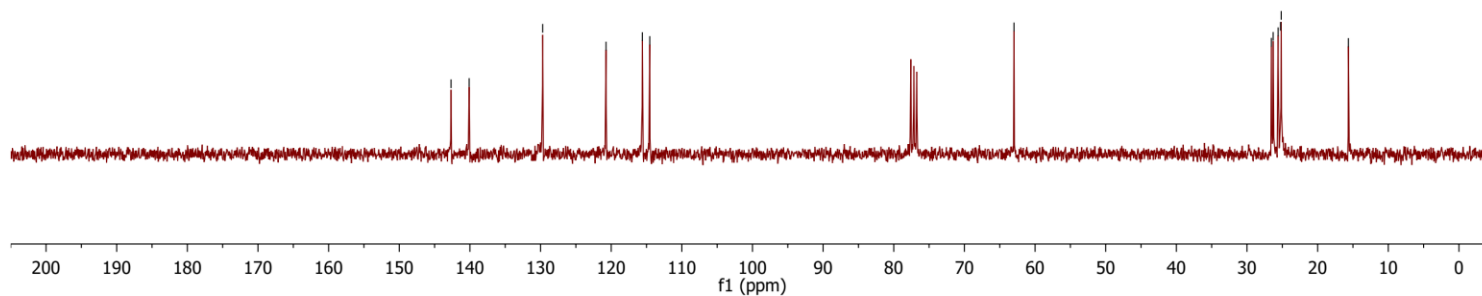

## Ethyl 2-(4-(cyclohexanesulfonamido)phenyl)acetate (8h)

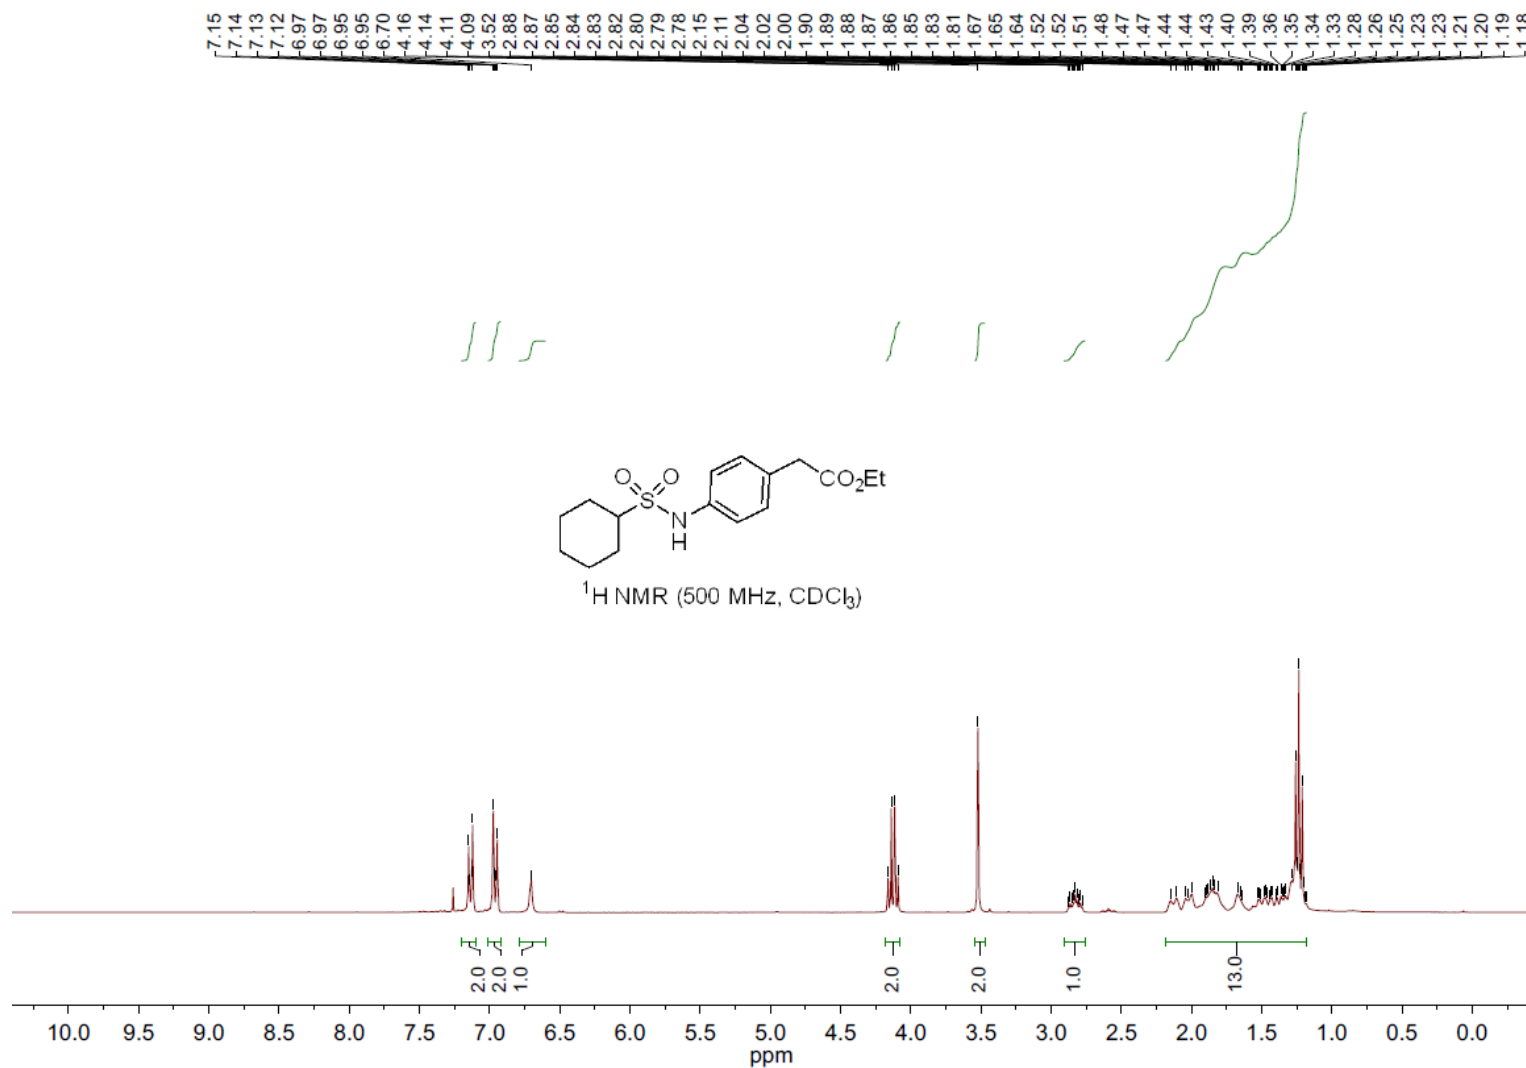

## Ethyl 2-(4-(cyclohexanesulfonamido)phenyl)acetate (8h)

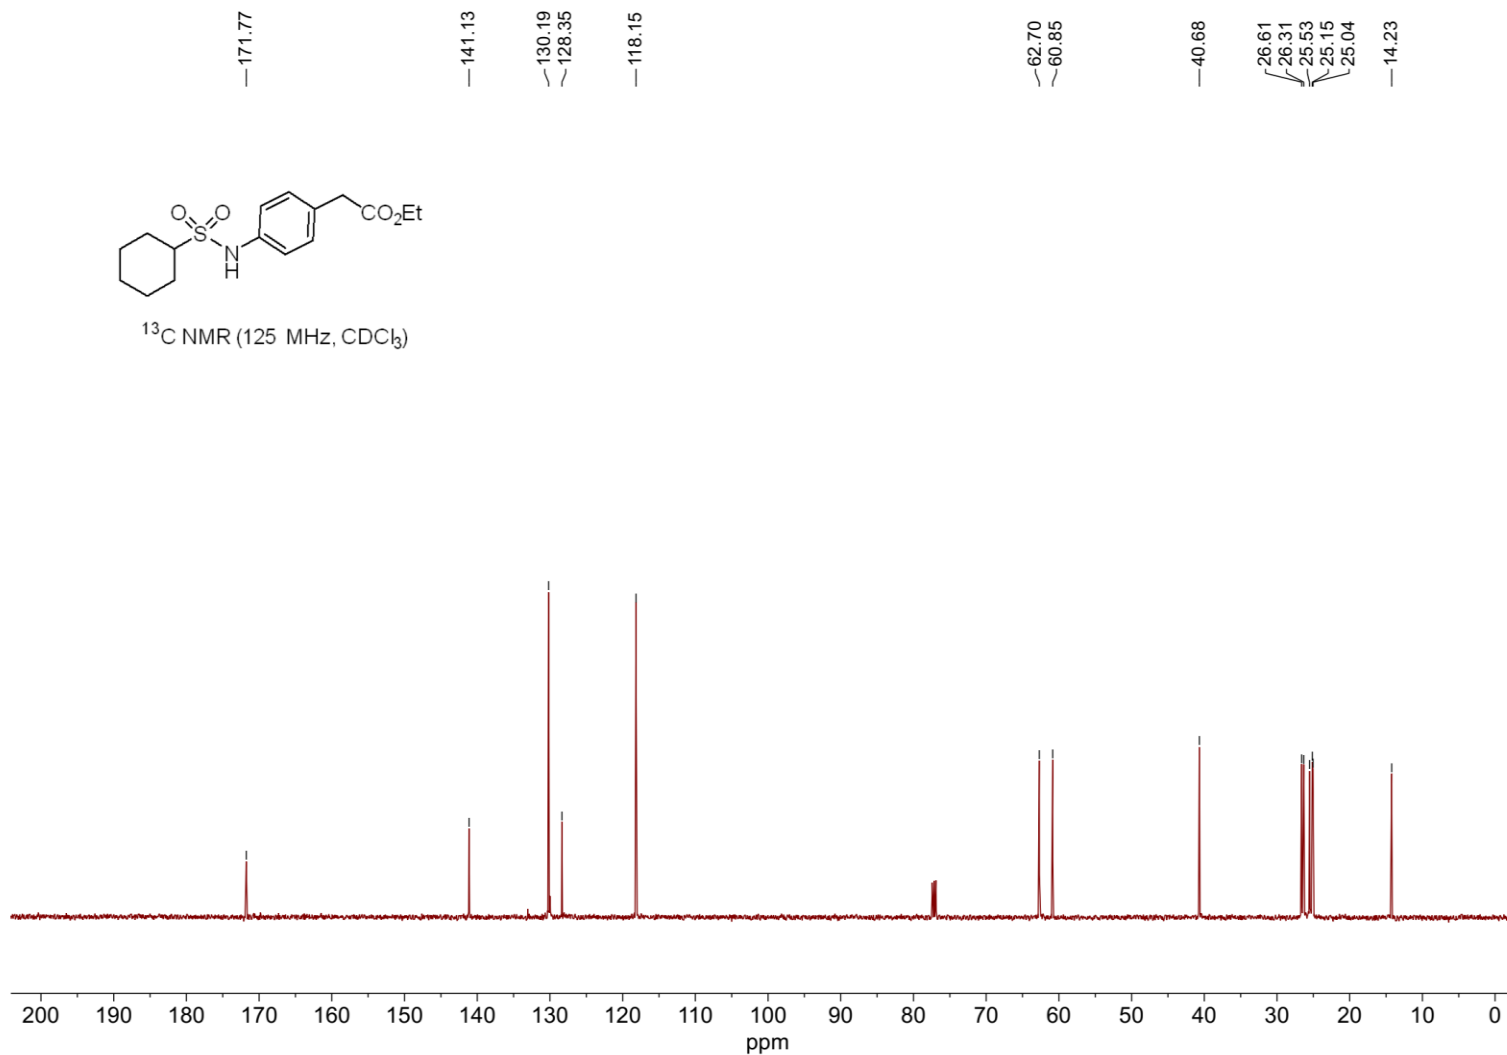

***N*-Methyl-*N*-(*p*-tolyl)cyclohexanesulfonamide (8i)**

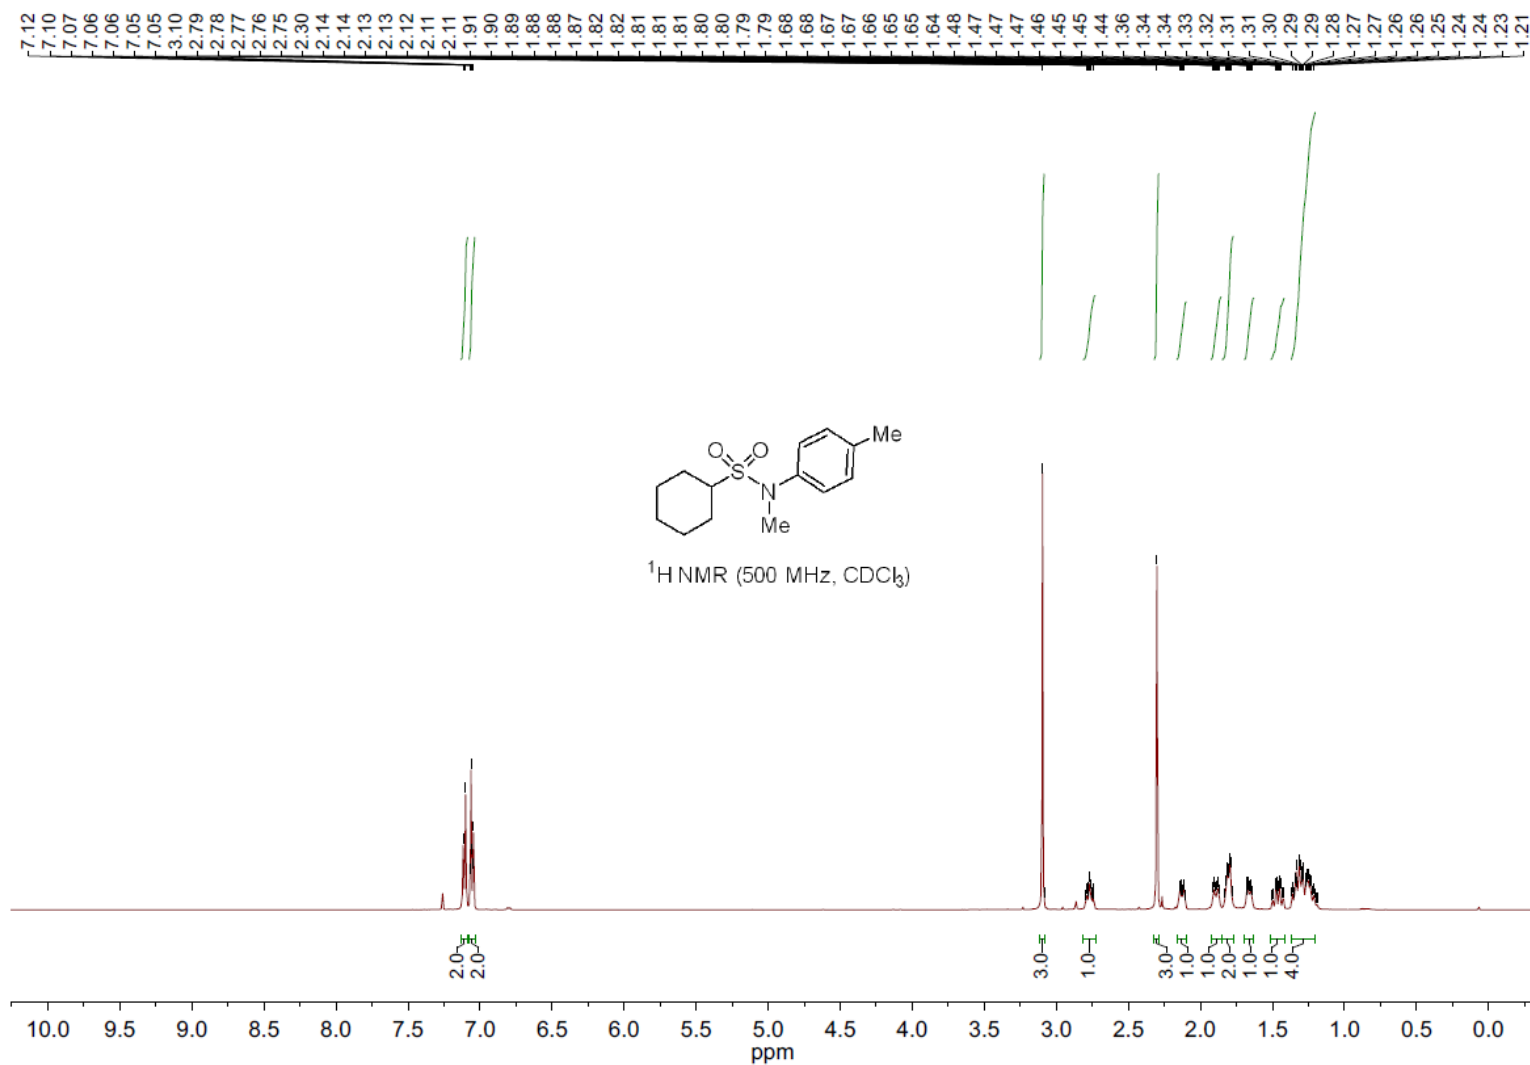



# ***N*-Methyl-*N*-(*p*-tolyl)cyclohexanesulfonamide (8i)**

—144.1      —133.6      —129.8      —121.1      —60.4      {31.2, 27.3, 26.4, 25.6, 25.3, 25.3, 20.8}

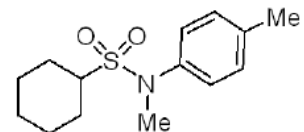

<sup>13</sup>C NMR (125 MHz, CDCl<sub>3</sub>)

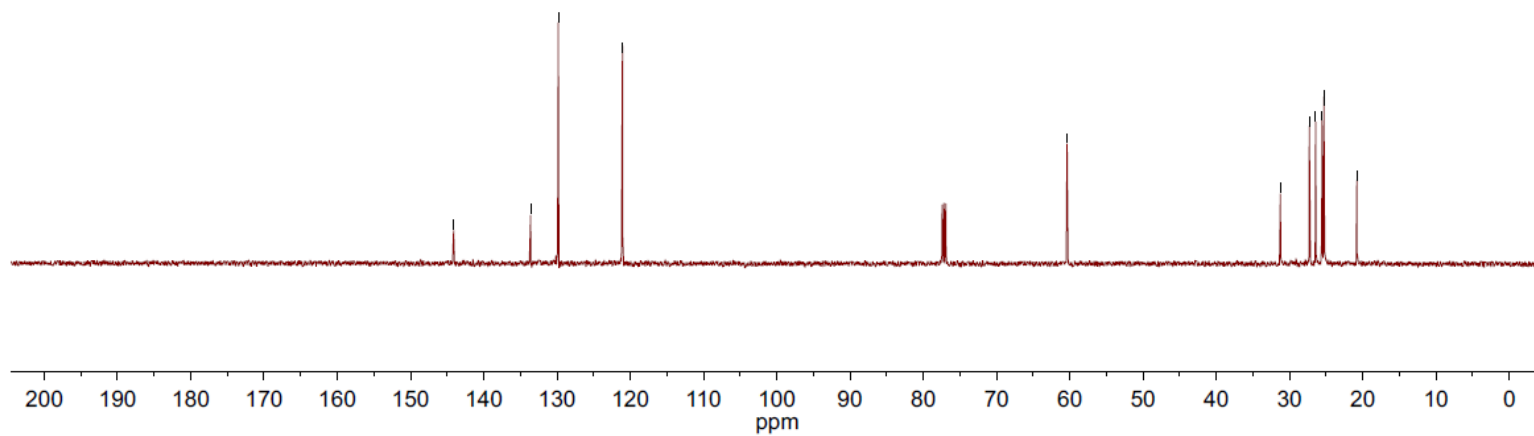

# ***N*-(4-Fluoro-2-methylphenyl)cyclohexanesulfonamide (8j)**

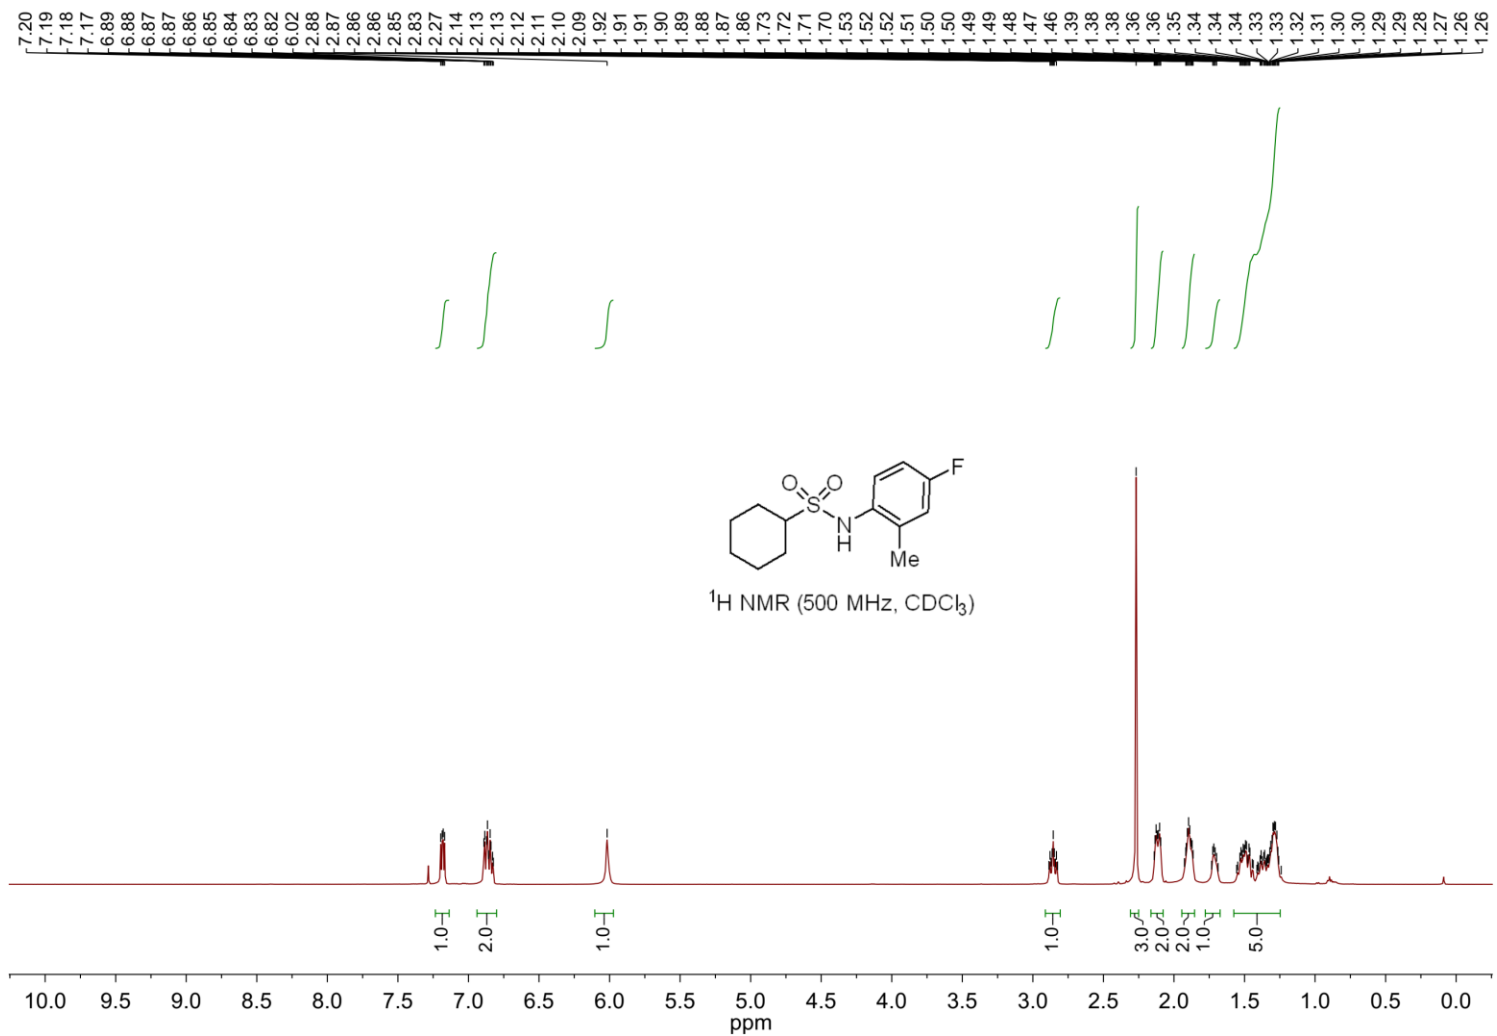

# ***N*-(4-Fluoro-2-methylphenyl)cyclohexanesulfonamide (8j)**

160.6  
158.7  
135.7  
132.0  
131.9  
122.6  
122.5  
117.6  
117.4  
113.6  
113.4  
63.2  
26.5  
26.4  
25.6  
25.4  
25.2  
18.3

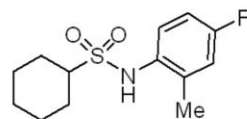

<sup>13</sup>C NMR (125 MHz, CDCl<sub>3</sub>)

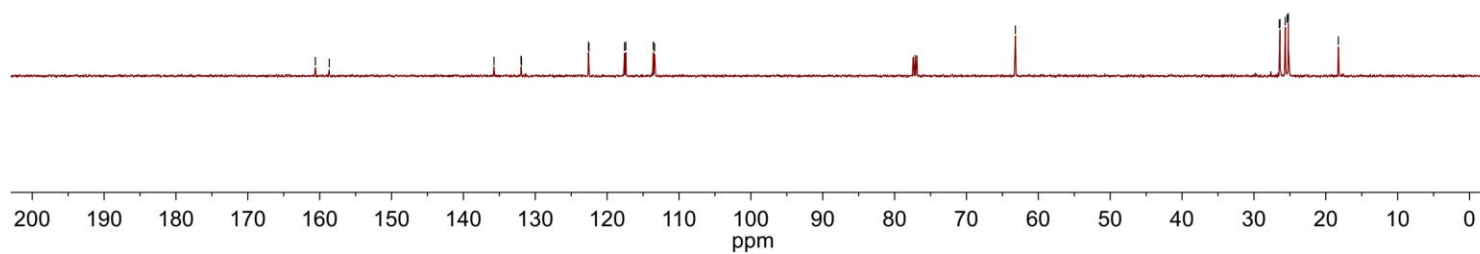

1-(Cyclohexylsulfonyl)indoline (8k)

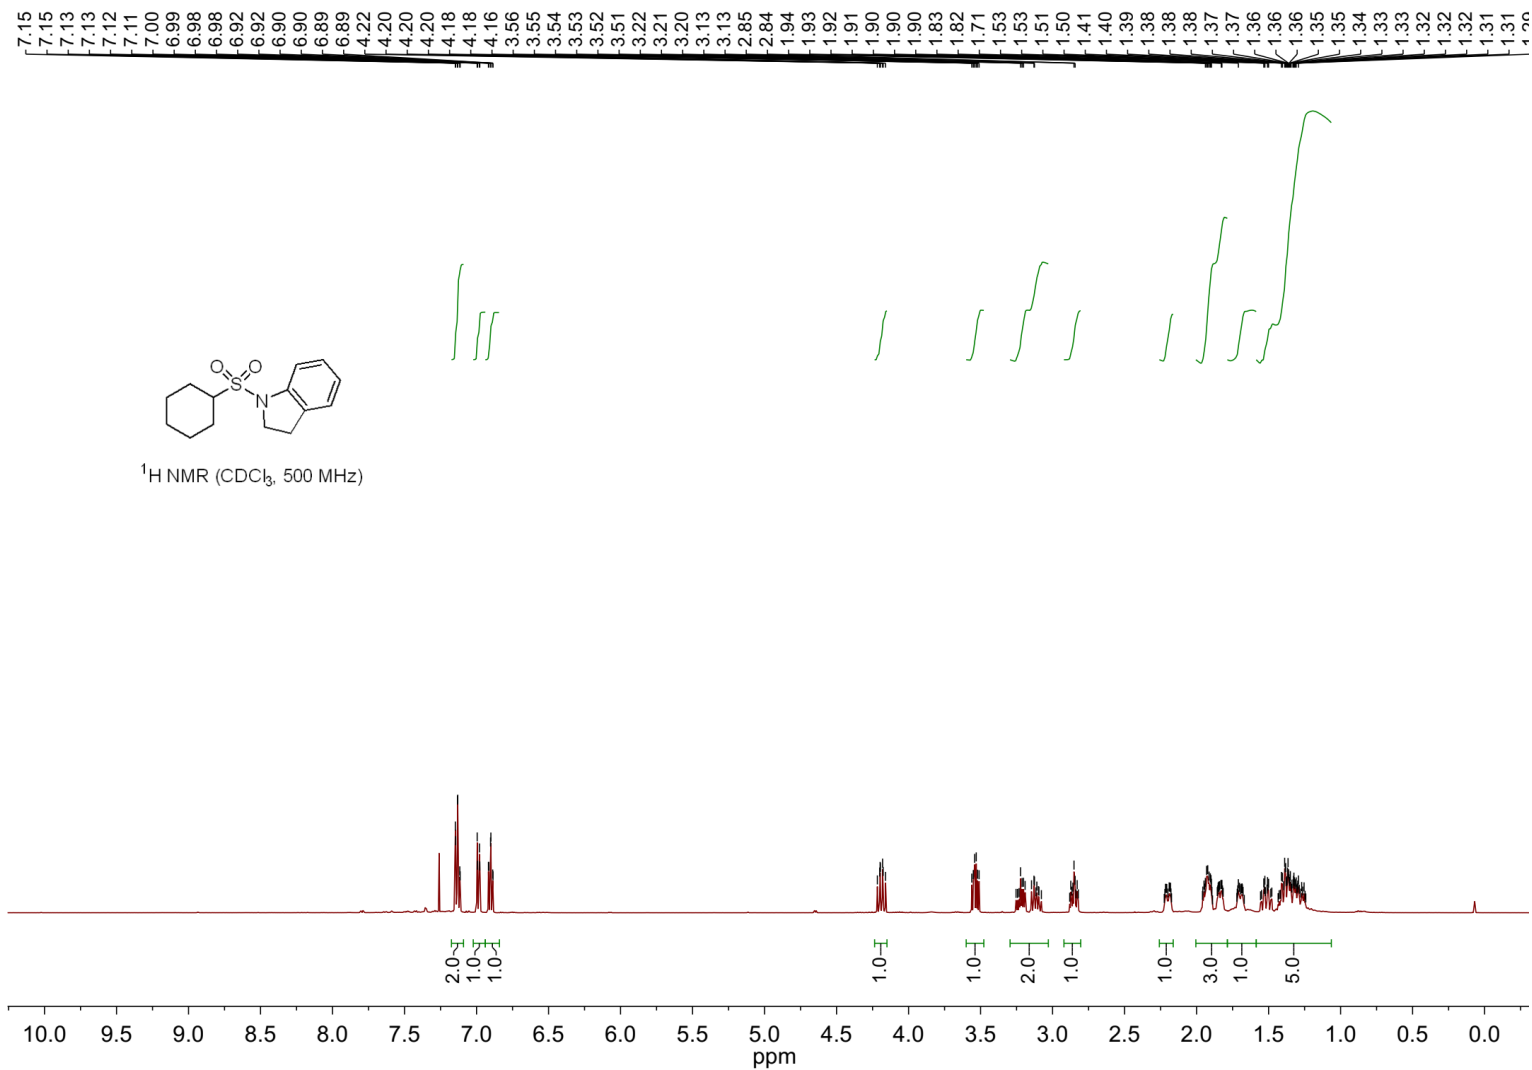

# 1-(Cyclohexylsulfonyl)indoline (8k)

<sup>13</sup>C NMR (125 MHz, CDCl<sub>3</sub>) peaks (ppm):  
147.7, 131.0, 127.7, 125.3, 122.4, 111.7, 60.4, 40.6, 28.9, 27.3, 26.4, 25.6, 25.4, 25.2

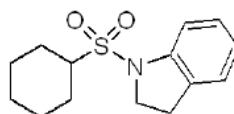

<sup>13</sup>C NMR (125 MHz, CDCl<sub>3</sub>)

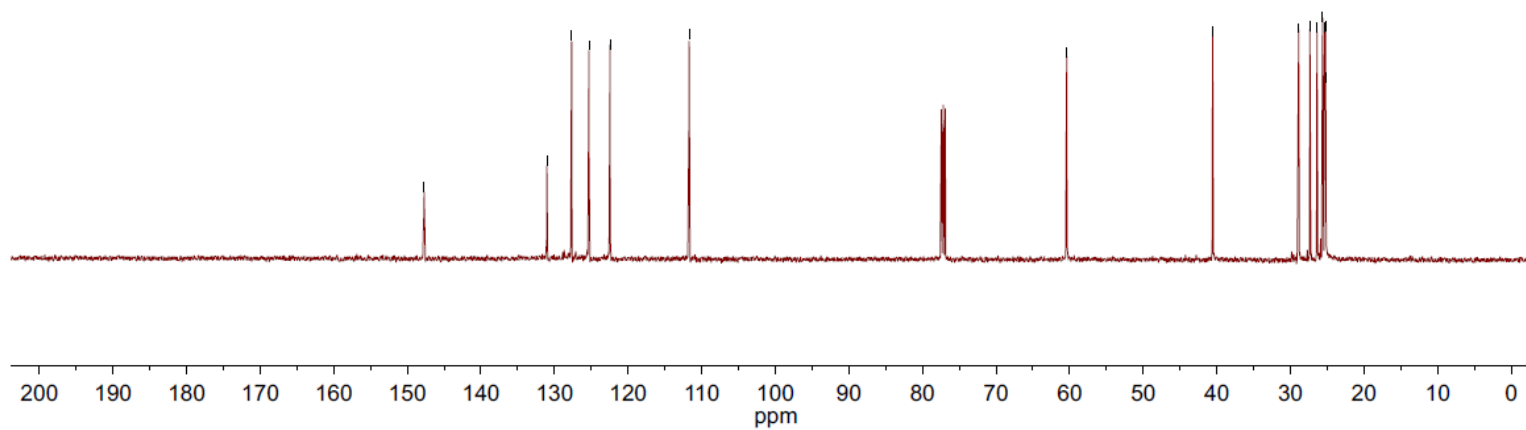

# 4-Phenyl-N-(3,4,5-trimethylphenyl)butane-1-sulfonamide (8l)

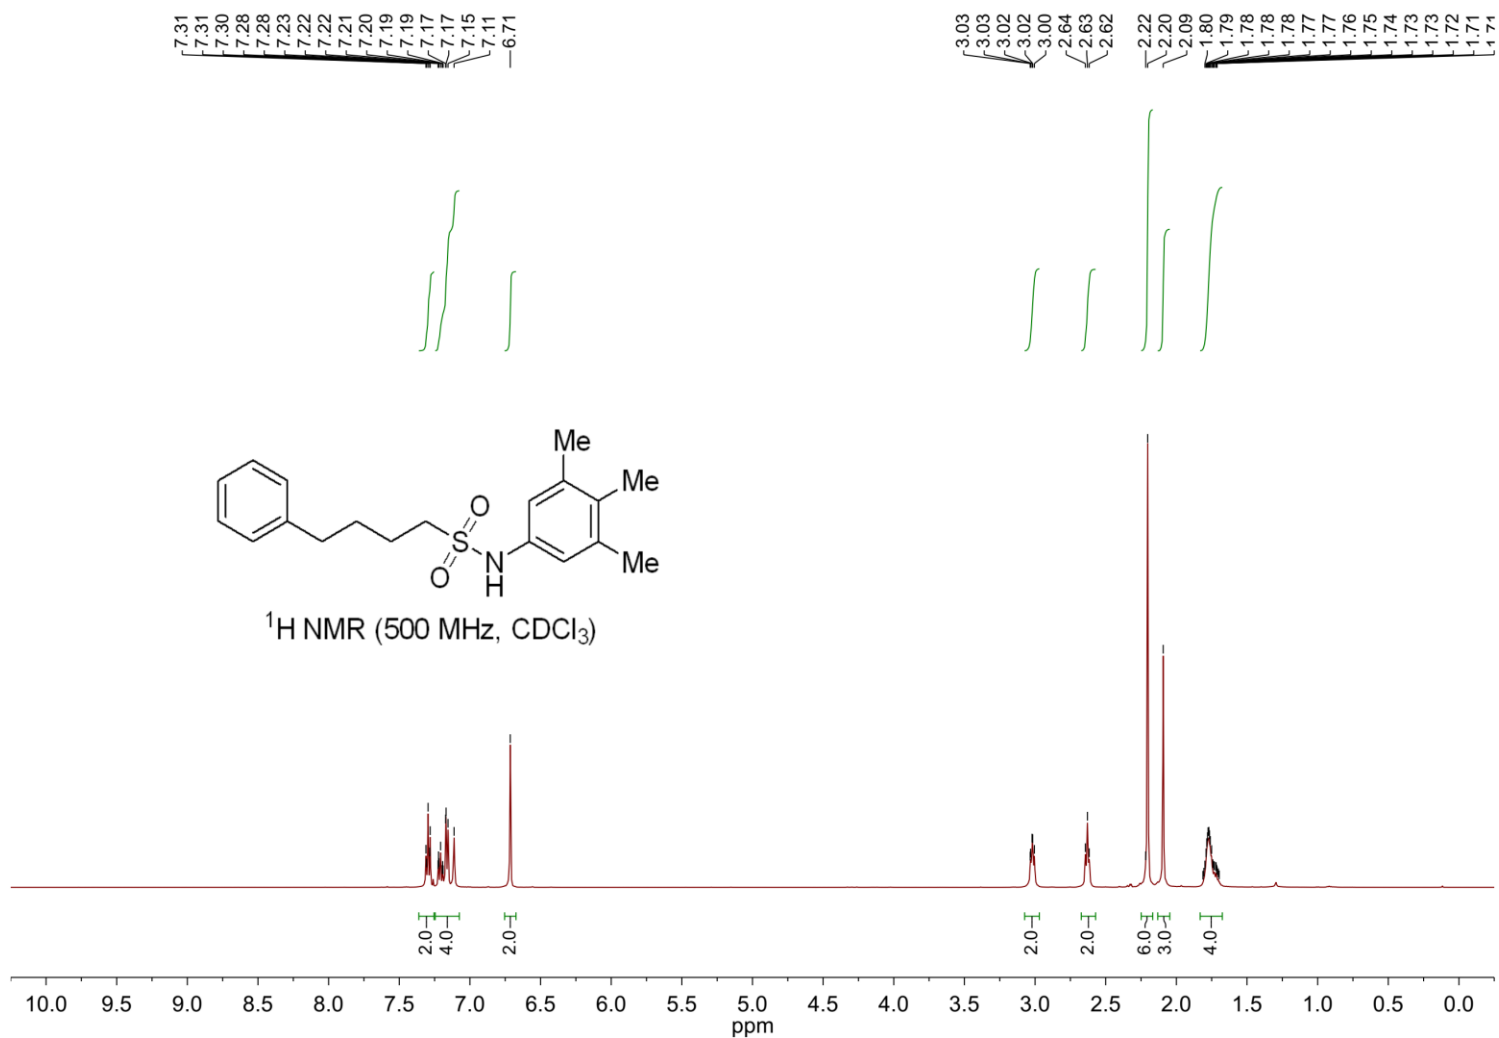

## 4-Phenyl-N-(3,4,5-trimethylphenyl)butane-1-sulfonamide (8l)

141.7  
138.3  
137.6  
129.8  
128.5  
128.4  
126.0  
117.9

55.6

35.5

30.4

23.2

20.7

14.8

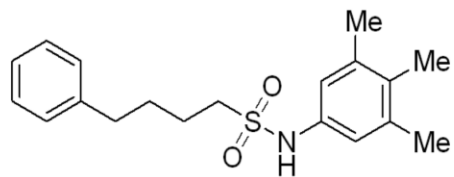

$^{13}\text{C}$  NMR (125 MHz,  $\text{CDCl}_3$ )

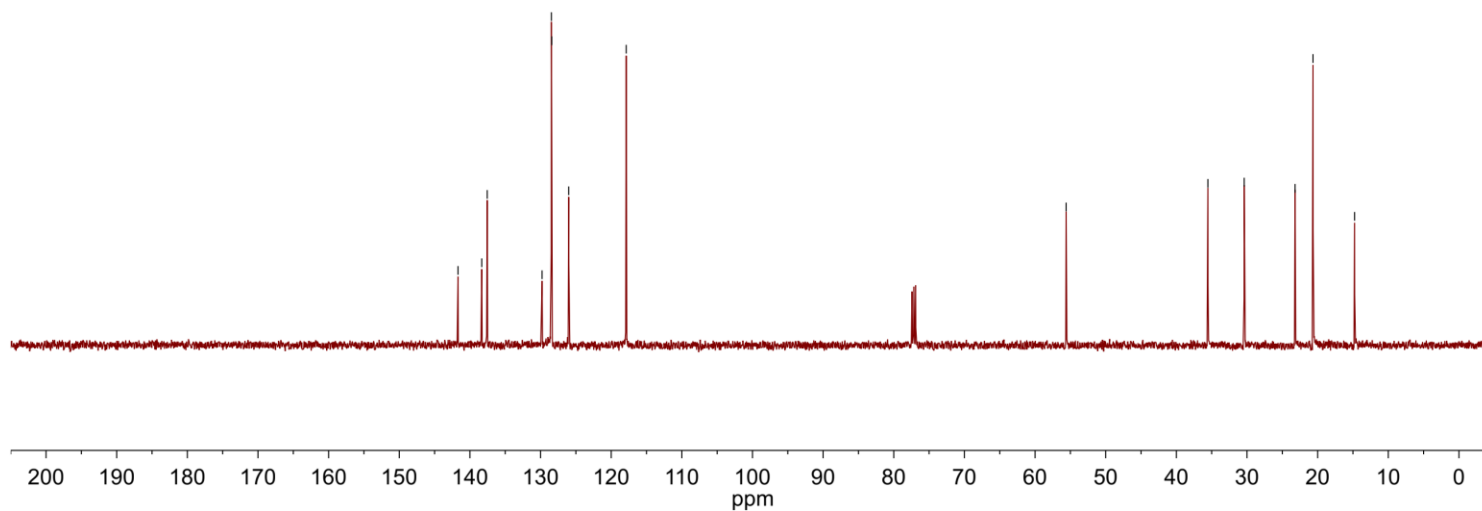

# **N-(3-isopropylphenyl)butane-1-sulfonamide (8m)**

7.30 7.29 7.27 7.26 7.25 7.24 7.16 7.14 7.13 6.90 6.89 6.89 6.87 6.86 6.86 6.85 6.84 3.02 3.01 3.01 2.99 2.98 2.85 2.84 2.83 2.81 2.80 2.79 1.72 1.71 1.69 1.68 1.66 1.48 1.47 1.46 1.45 1.44 1.44 1.43 1.42 1.41 1.41 1.39 1.39 1.38 1.36 1.26 1.23 1.21 1.21 1.20 1.19 1.17 0.93 0.92 0.90

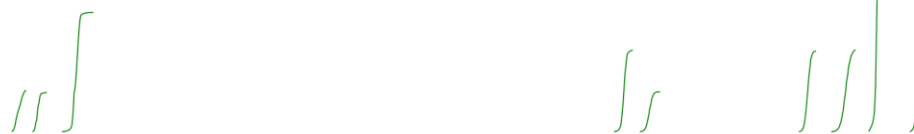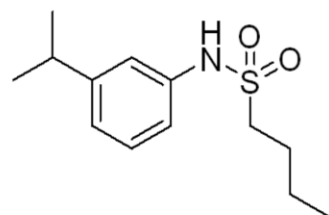

<sup>1</sup>H NMR (500 MHz, CDCl<sub>3</sub>)

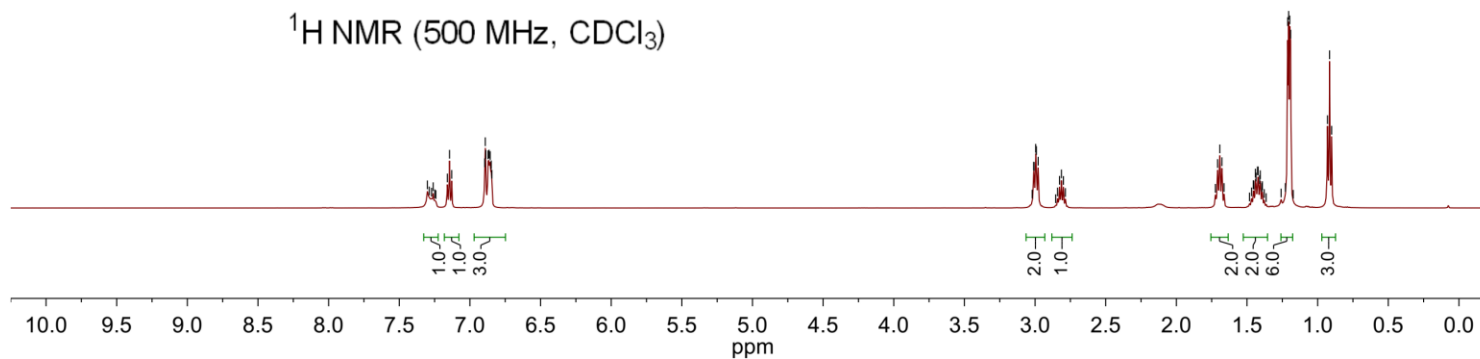

S300

[Go back to table of contents](#)



## ***N*-(3-isopropylphenyl)butane-1-sulfonamide (8m)**

— 150.5      — 141.6      — 129.4      — 121.1      — 116.4      — 115.6      — 55.7      — 34.2      ~ 25.5      ~ 24.0      ~ 21.9      — 13.8

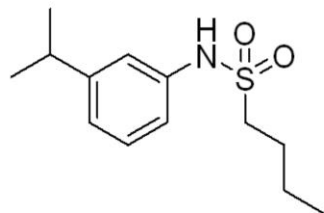

<sup>13</sup>C NMR (125 MHz, CDCl<sub>3</sub>)

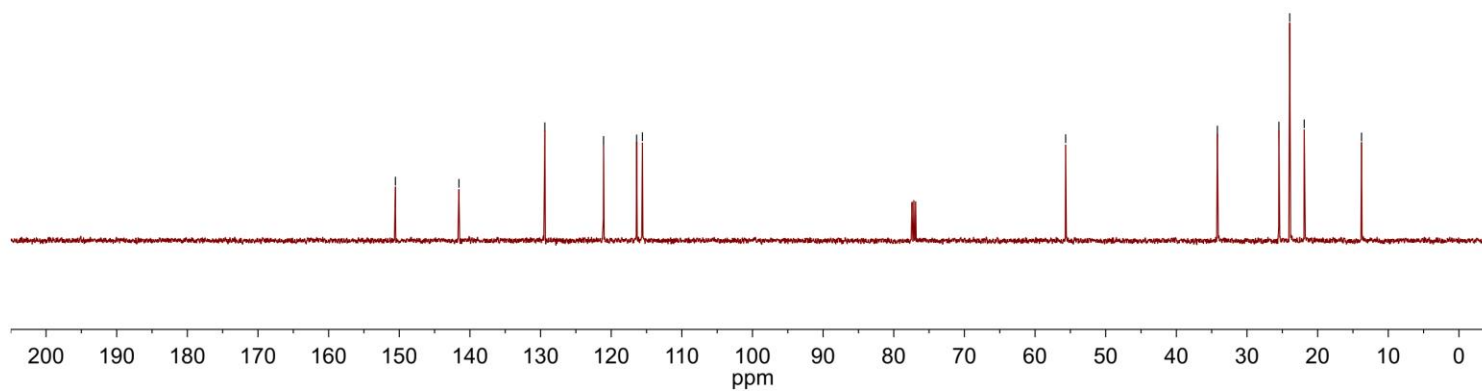

***N*-(3-acetylphenyl)butane-1-sulfonamide (8n)**

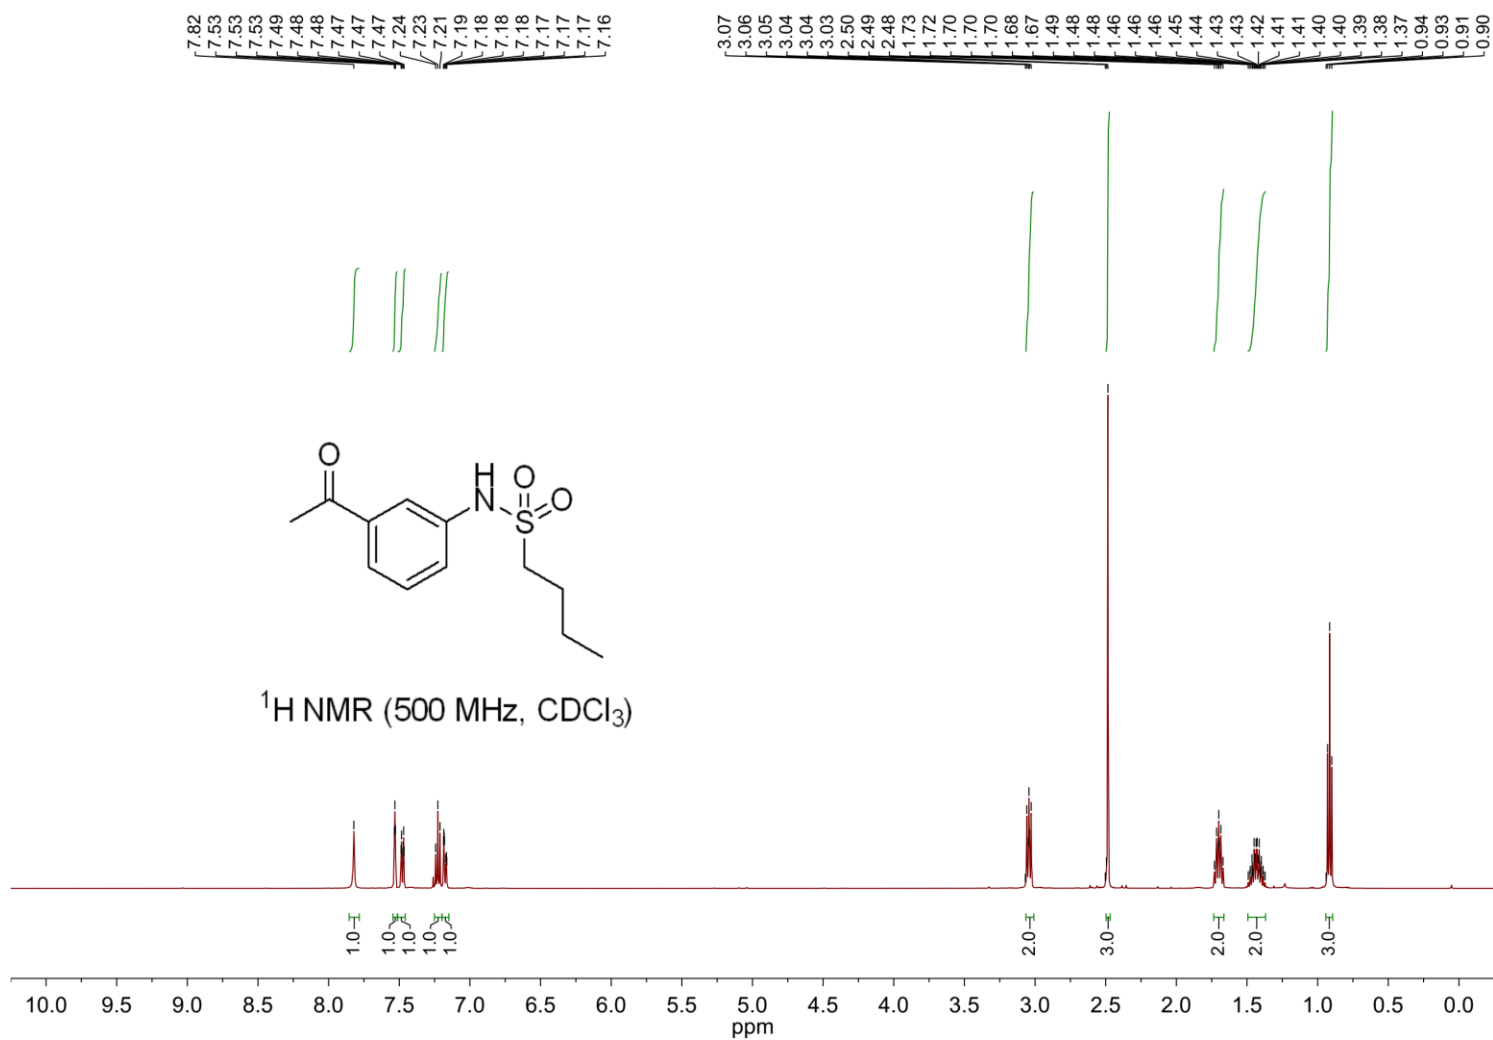

# ***N*-(3-acetylphenyl)butane-1-sulfonamide (8n)**

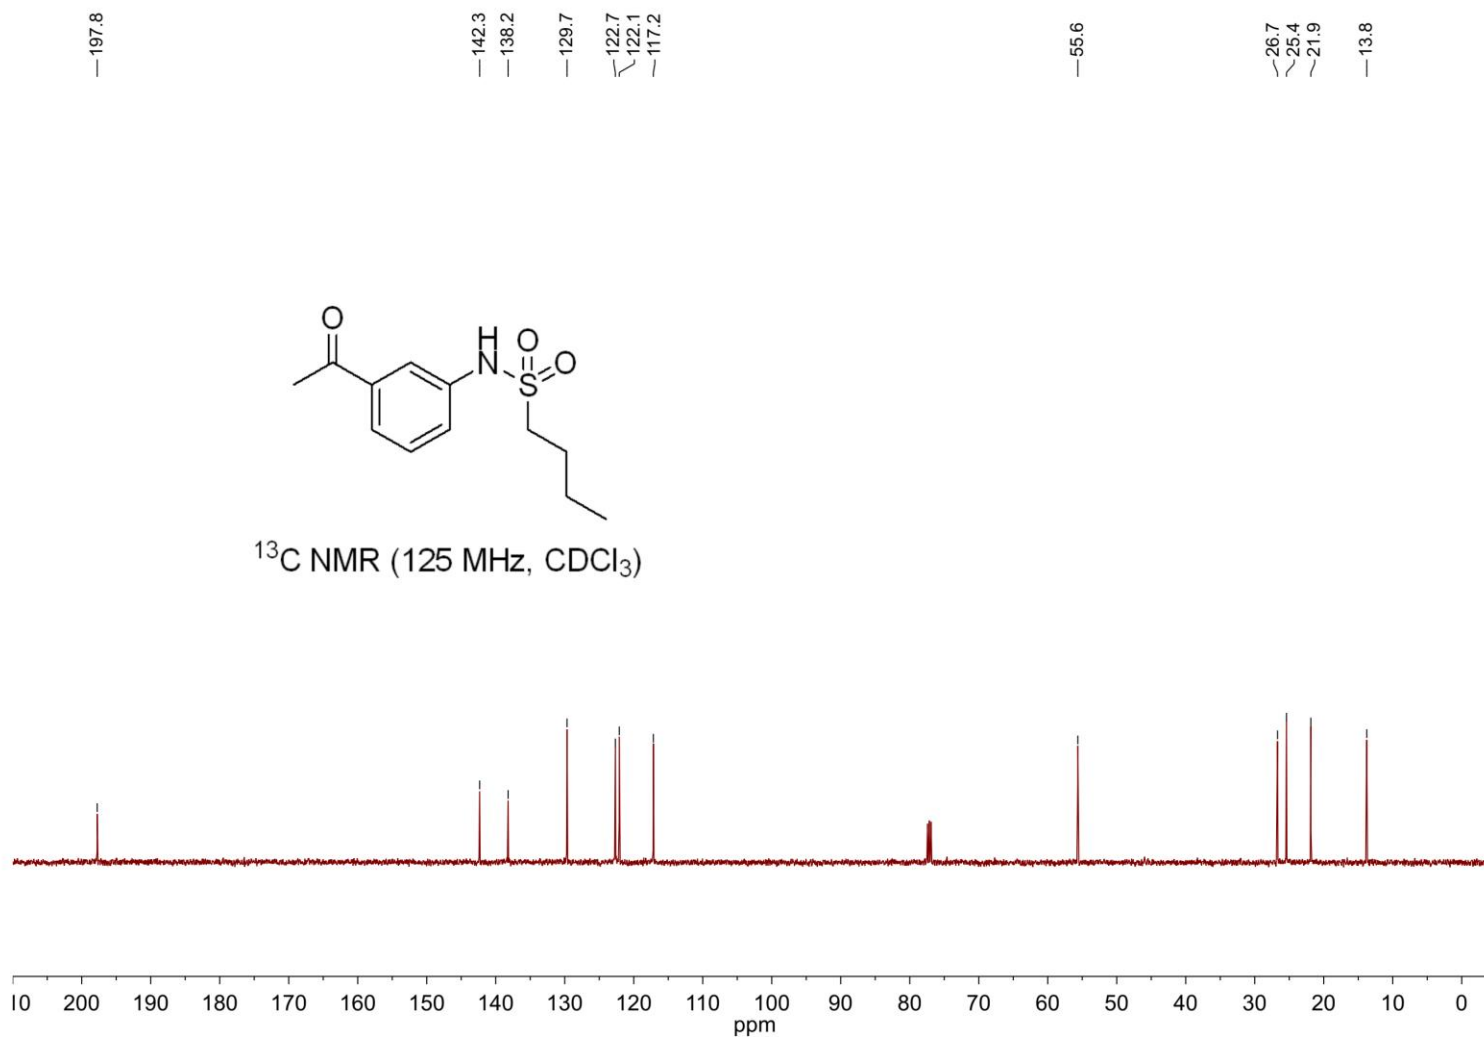

# 1-Cyclopentyl-N-(2,3-dihydro-1H-inden-5-yl)methanesulfonamide (8o)

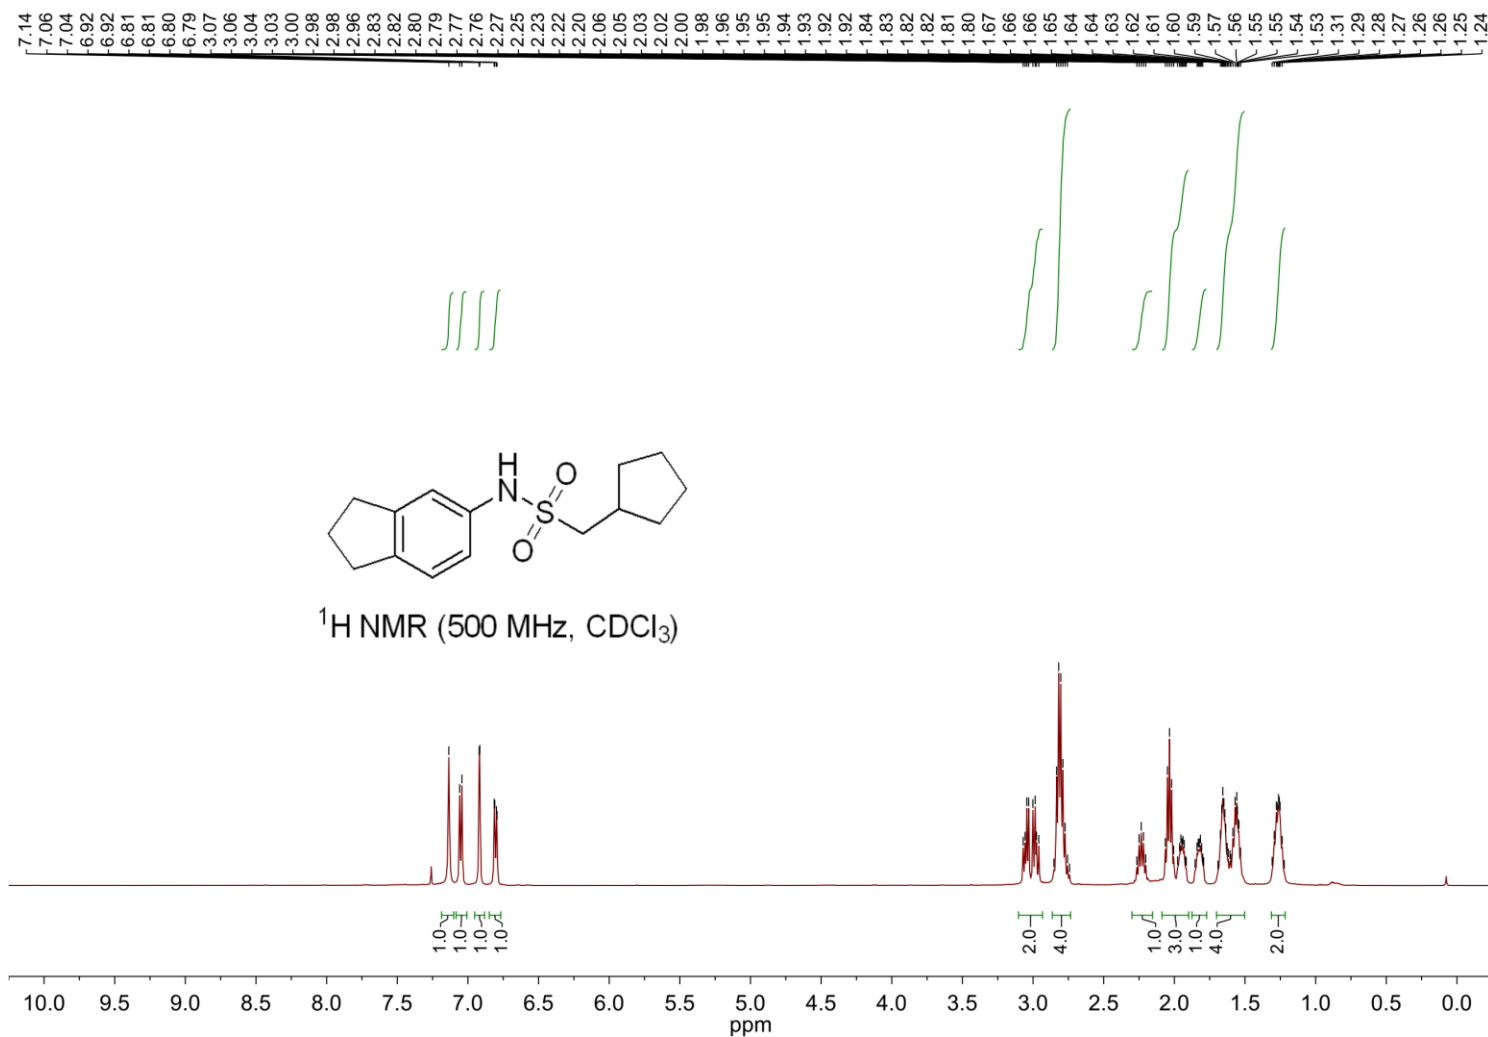

# 1-Cyclopentyl-N-(2,3-dihydro-1H-inden-5-yl)methanesulfonamide (8o)

<sup>13</sup>C NMR (125 MHz, CDCl<sub>3</sub>)  
 145.7, 139.7, 139.0, 124.9, 116.9, 115.1, 62.1, 35.3, 33.0, 32.6, 32.2, 25.7, 25.0, 25.0

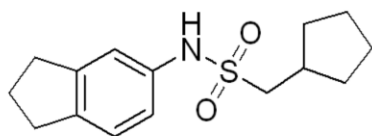

<sup>13</sup>C NMR (125 MHz, CDCl<sub>3</sub>)

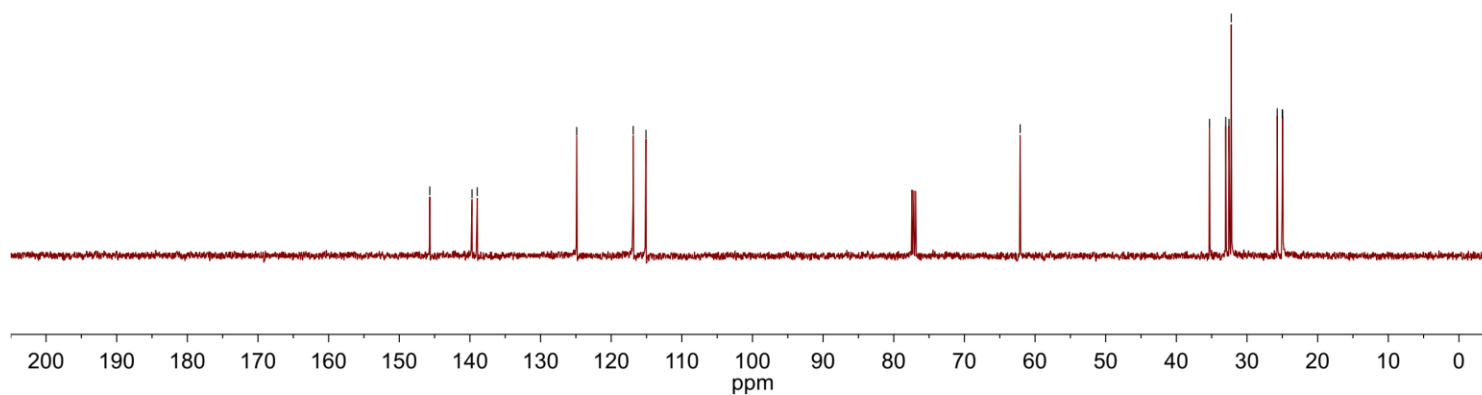

# ***N*-(2-(Methylthio)phenyl)tetrahydro-2*H*-pyran-4-sulfonamide (8p)**

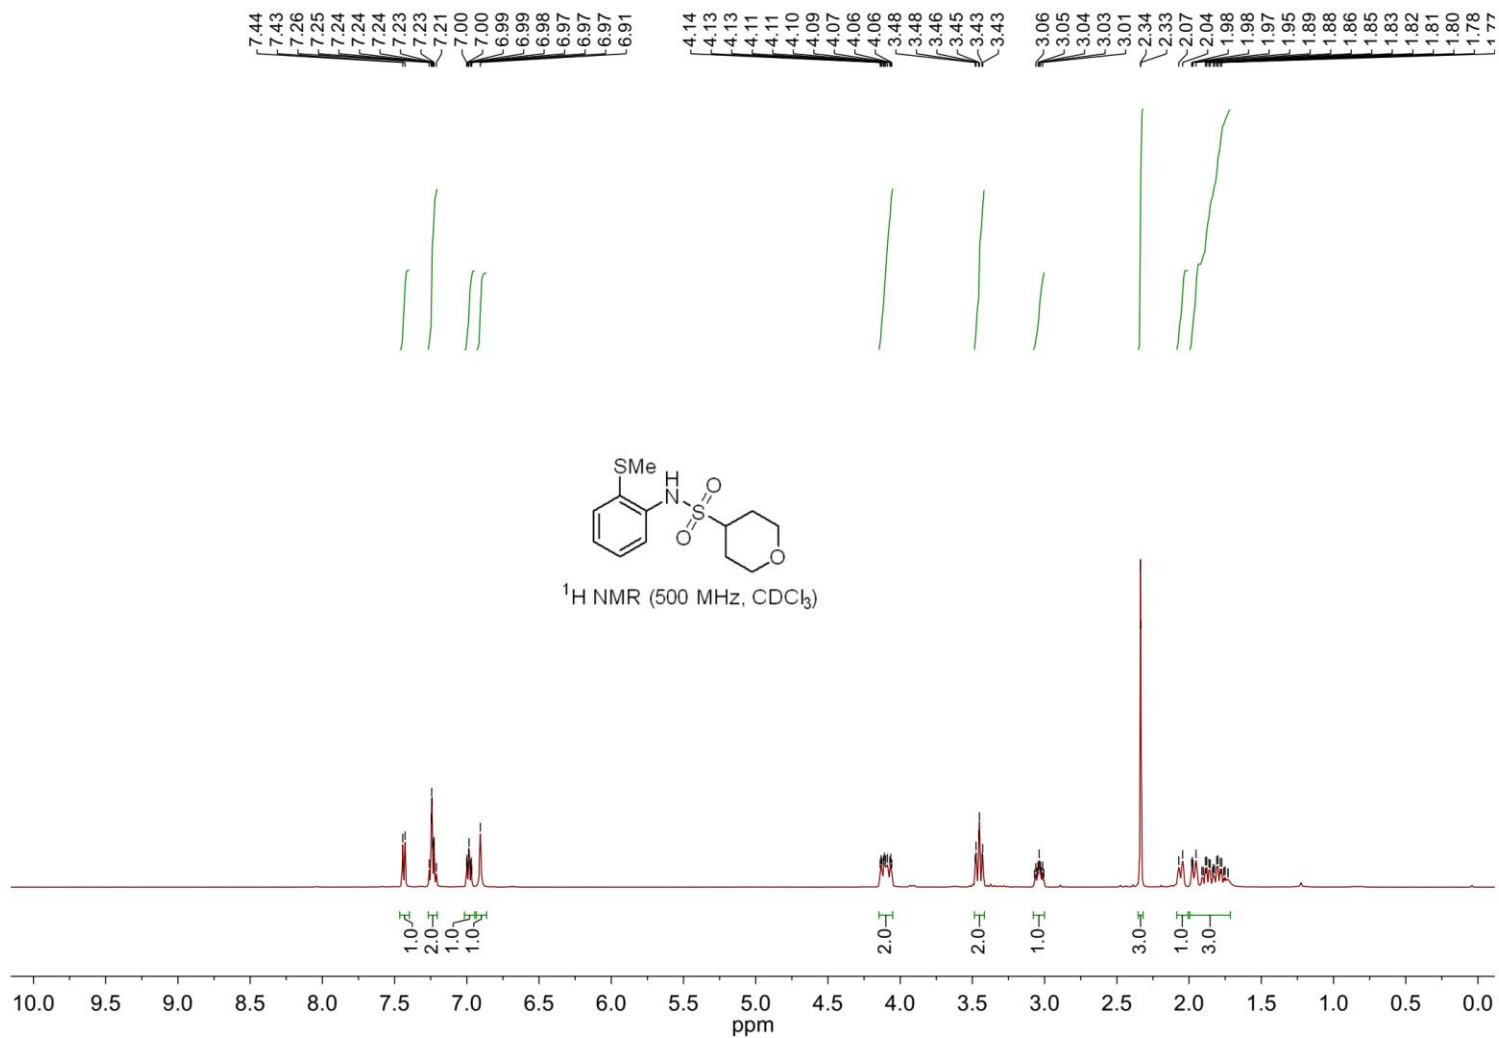

# ***N*-(2-(Methylthio)phenyl)tetrahydro-2*H*-pyran-4-sulfonamide (8p)**

<sup>13</sup>C NMR (125 MHz, CDCl<sub>3</sub>) peaks (ppm):  
 142.2, 133.8, 129.4, 126.1, 123.8, 117.6, 77.4, 77.2, 76.9, 67.0, 66.9, 60.4, 26.4, 26.1, 19.3

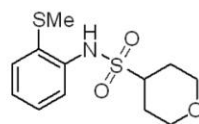

<sup>13</sup>C NMR (125 MHz, CDCl<sub>3</sub>)

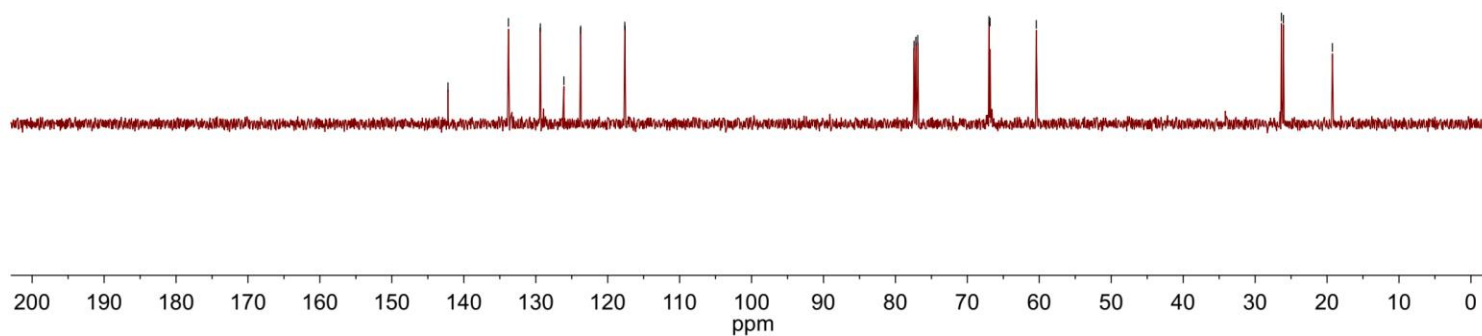

# ***N*-(3,5-dimethylphenyl)heptane-4-sulfonamide (8q)**

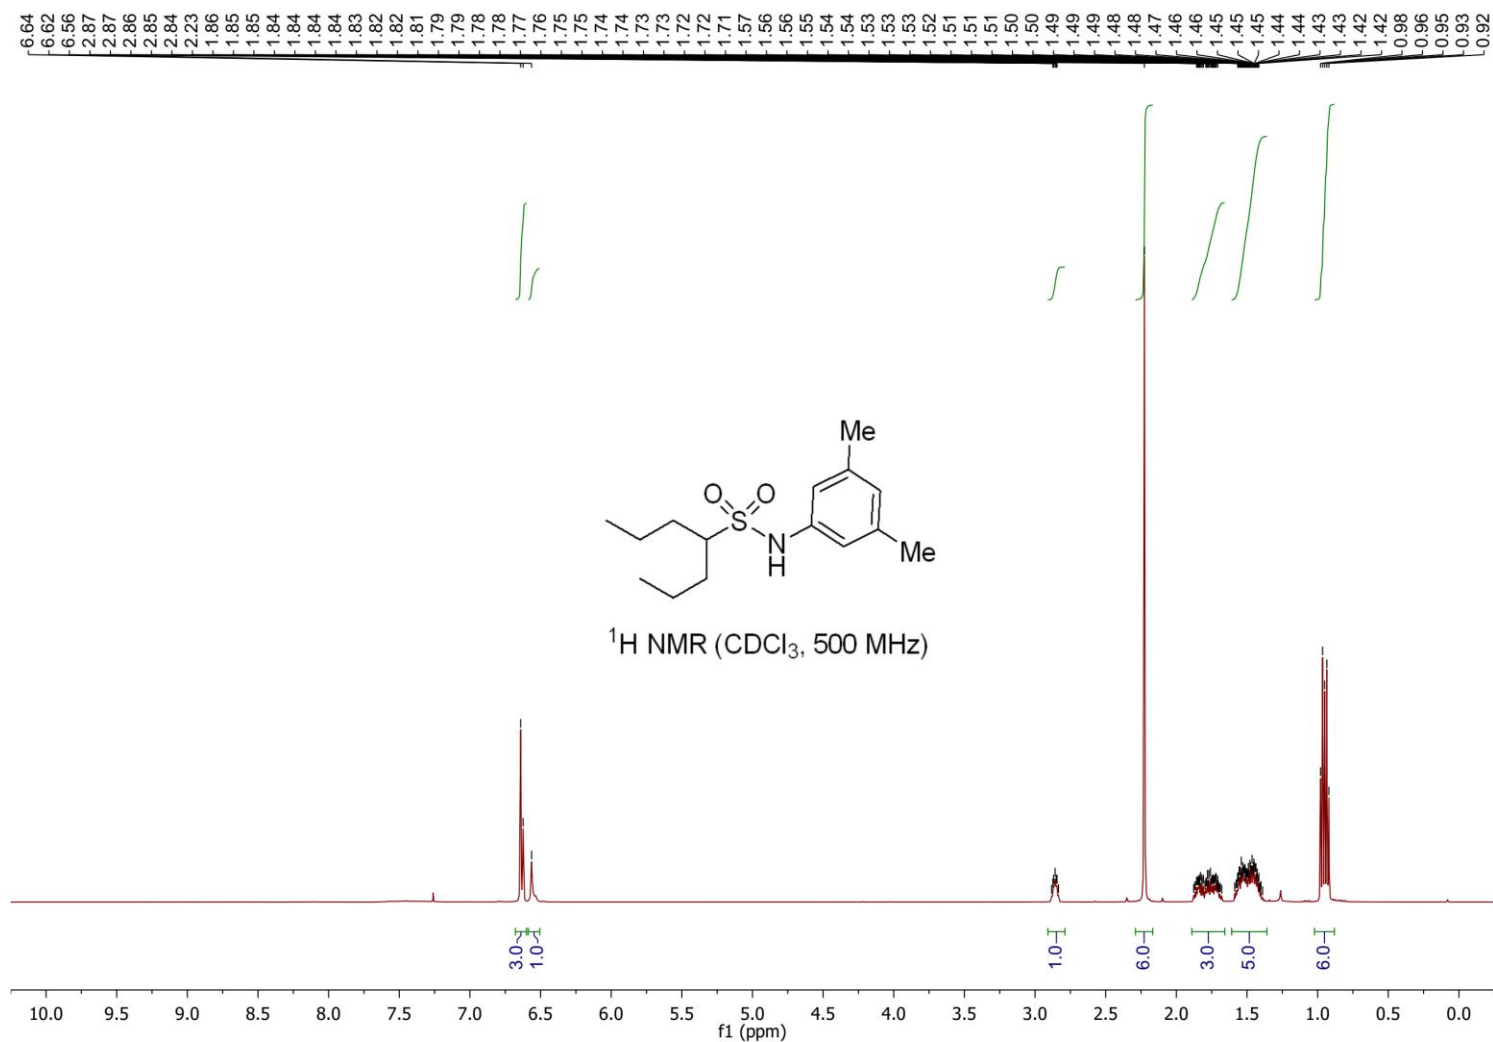



# ***N*-(3,5-dimethylphenyl)heptane-4-sulfonamide (8q)**

141.9  
139.2  
124.7  
116.0  
64.1  
30.1  
28.8  
21.4  
20.2  
19.5  
14.3  
14.2

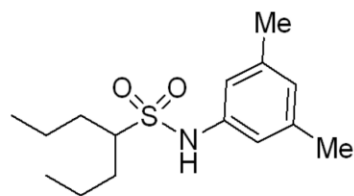

<sup>13</sup>C NMR (CDCl<sub>3</sub>, 125 MHz)

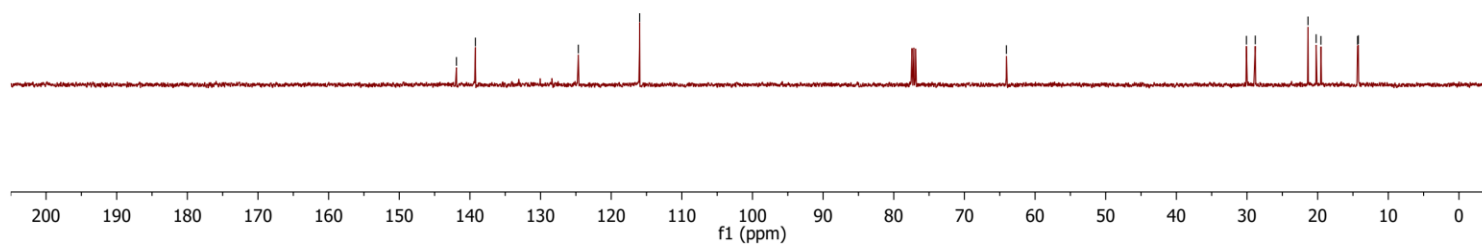

***N*-(2,3-dihydro-1*H*-inden-5-yl)-4,4-difluorocyclohexane-1-sulfonamide (8r)**

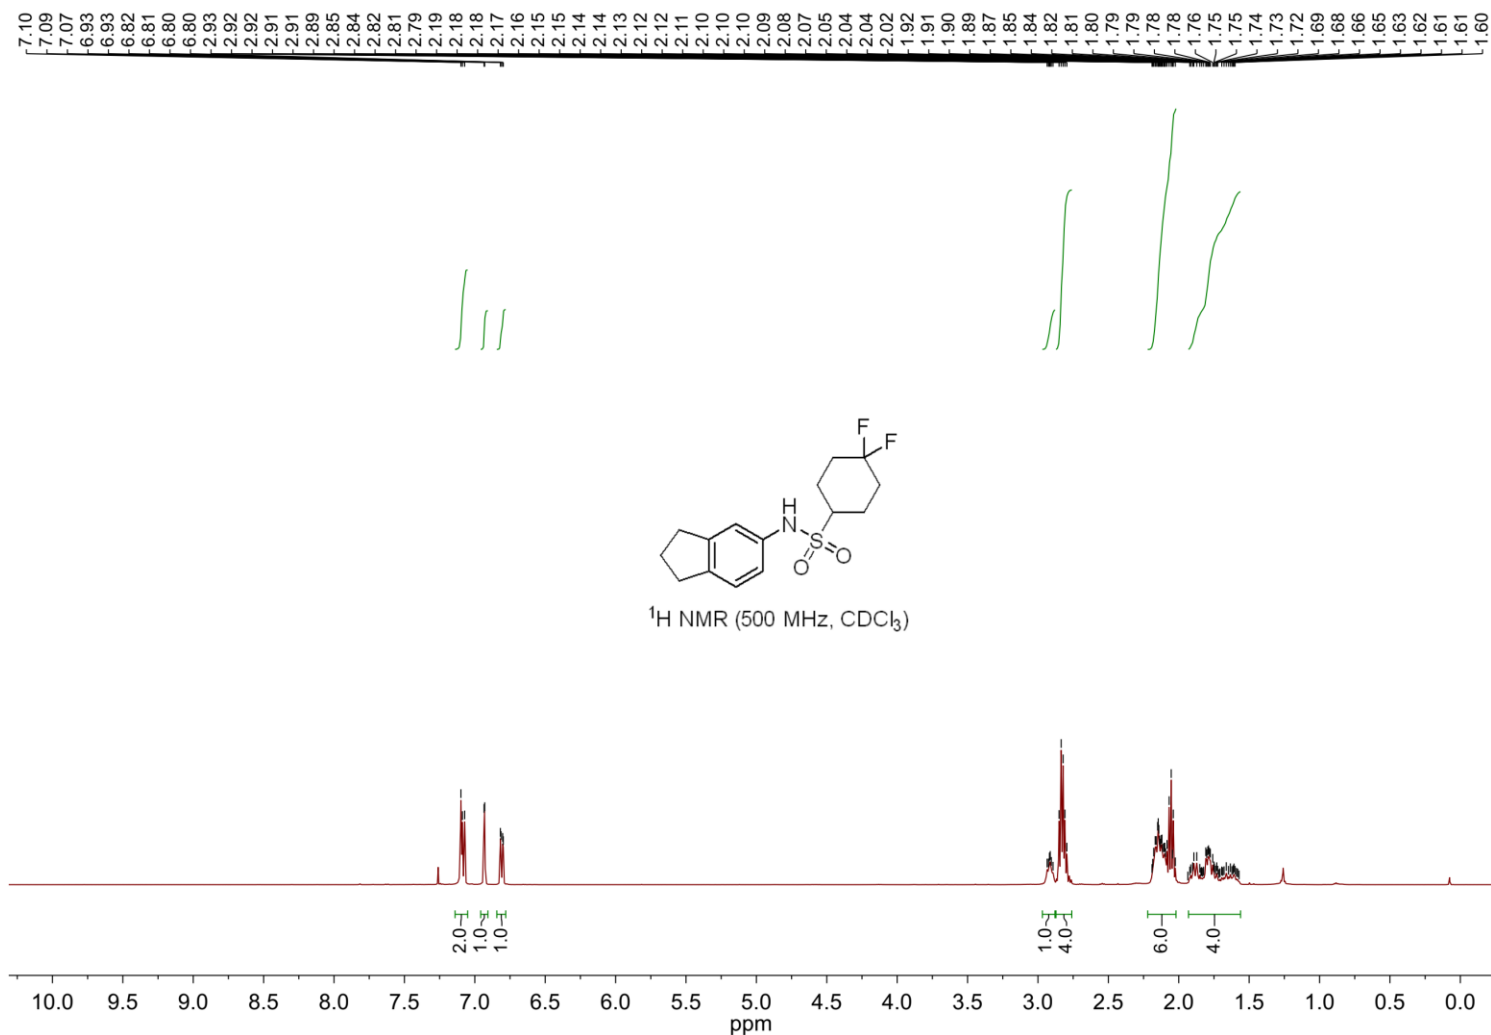

# ***N*-(2,3-dihydro-1*H*-inden-5-yl)-4,4-difluorocyclohexane-1-sulfonamide (8r)**

<sup>13</sup>C NMR (125 MHz, CDCl<sub>3</sub>) peaks (ppm):  
 145.9, 139.5, 139.4, 125.0, 124.2, 122.3, 120.4, 116.8, 114.9, 60.1, 32.9, 32.5, 32.3, 32.1, 32.1, 31.9, 25.6, 23.3, 23.2, 23.0, 23.0

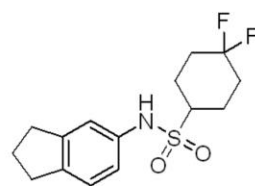

<sup>13</sup>C NMR (125 MHz, CDCl<sub>3</sub>)

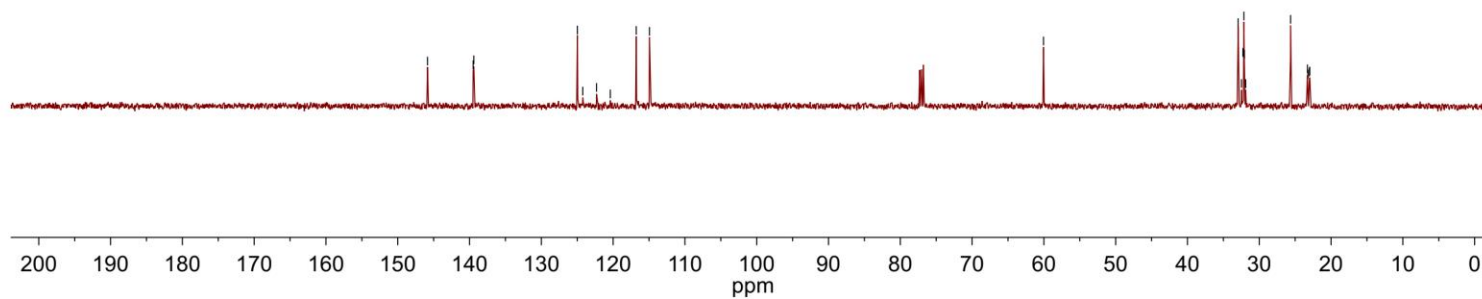

# ***N*-(2-chloro-4-methoxyphenyl)tetrahydro-2*H*-pyran-4-sulfonamide (8s)**

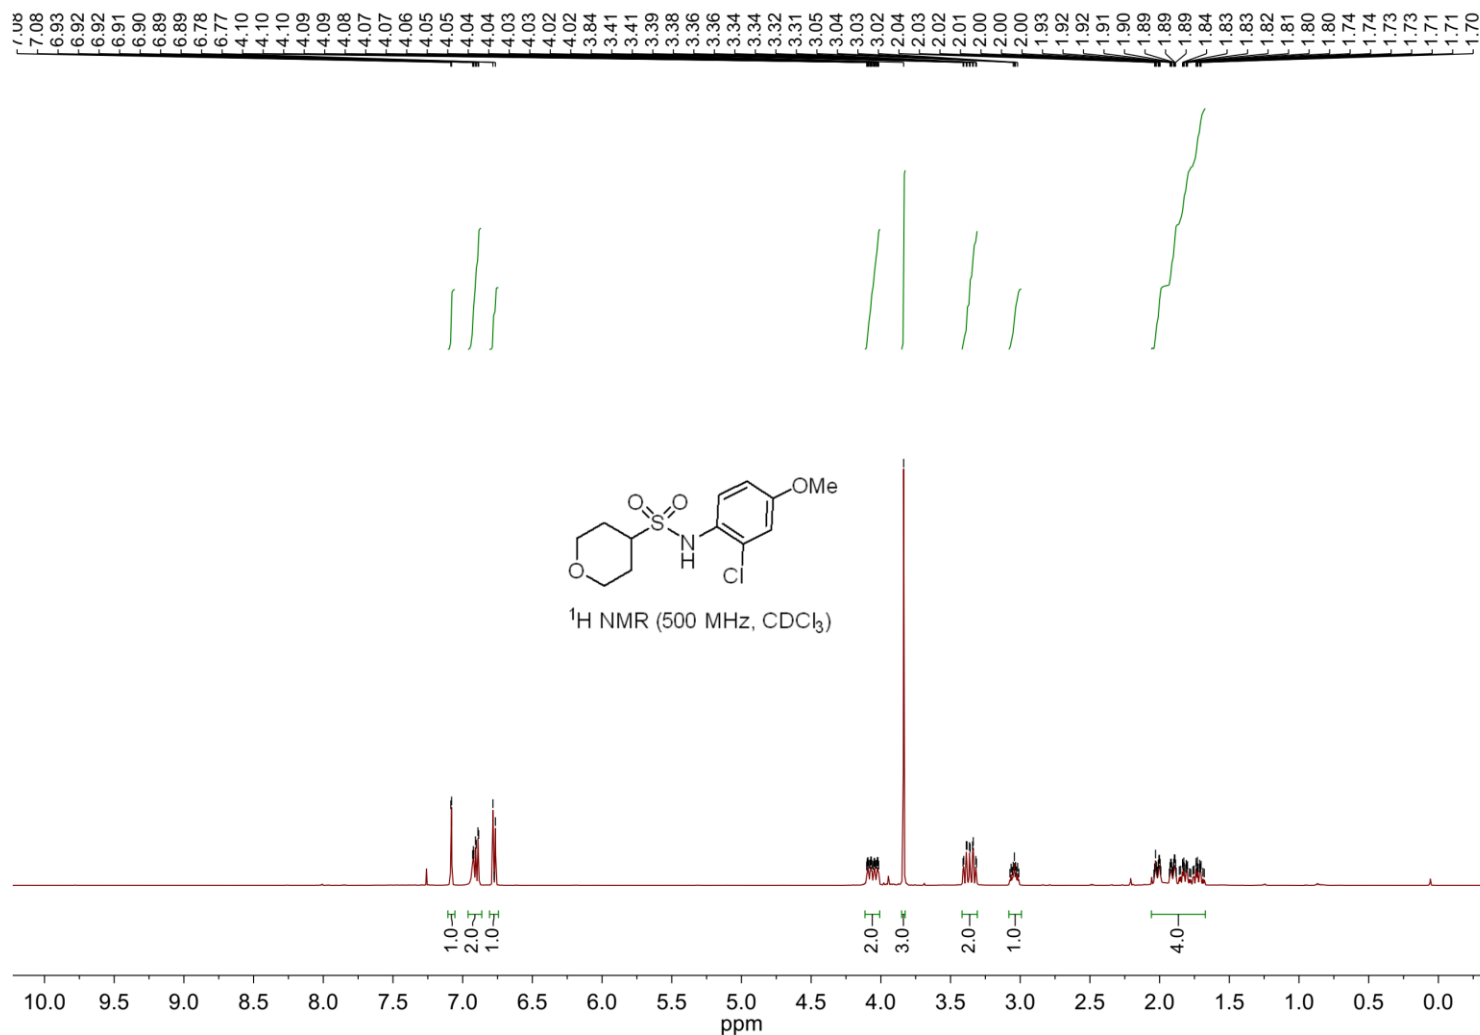

# ***N*-(2-chloro-4-methoxyphenyl)tetrahydro-2*H*-pyran-4-sulfonamide (8s)**

—151.8 —135.0 ~123.2 ~121.8 ~118.9 —113.0 66.9 66.7 —59.9 —56.6 26.9 26.4

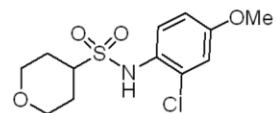

<sup>13</sup>C NMR (125 MHz, CDCl<sub>3</sub>)

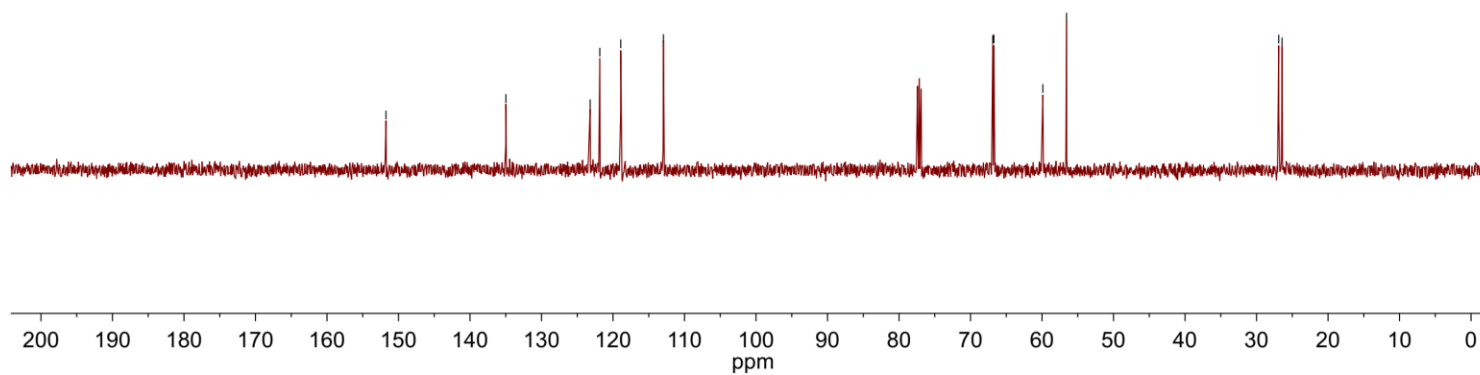

# **N-(4-Chlorophenyl)-N-methylbutane-1-sulfonamide (8t)**

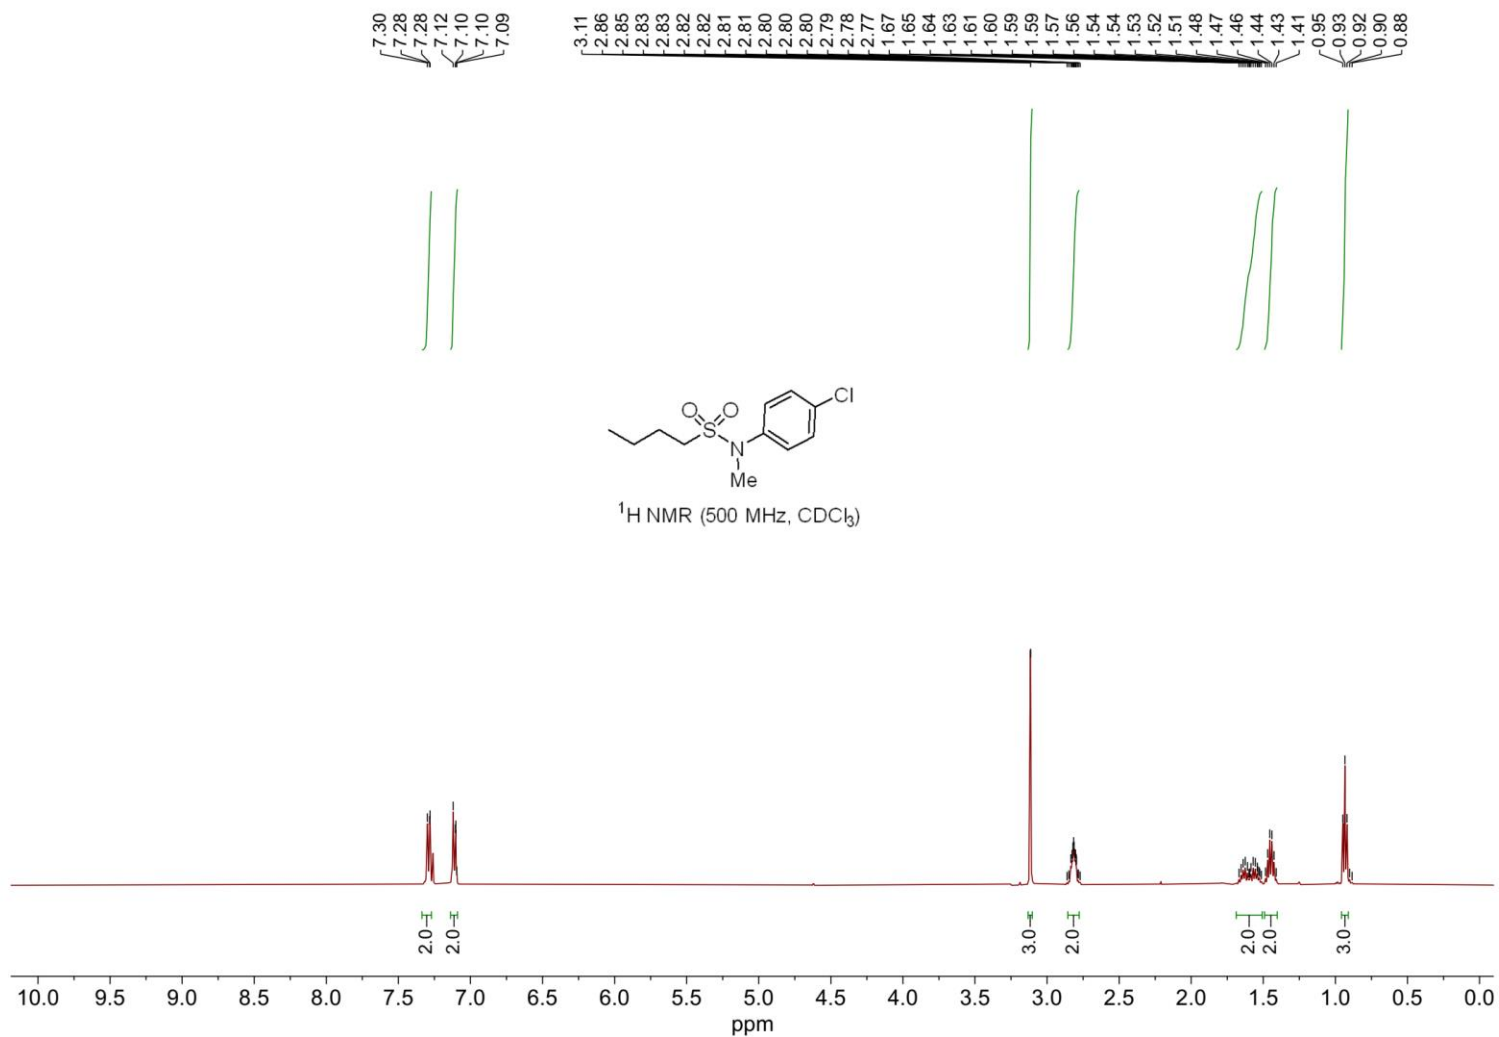

## ***N*-(4-Chlorophenyl)-*N*-methylbutane-1-sulfonamide (8t)**

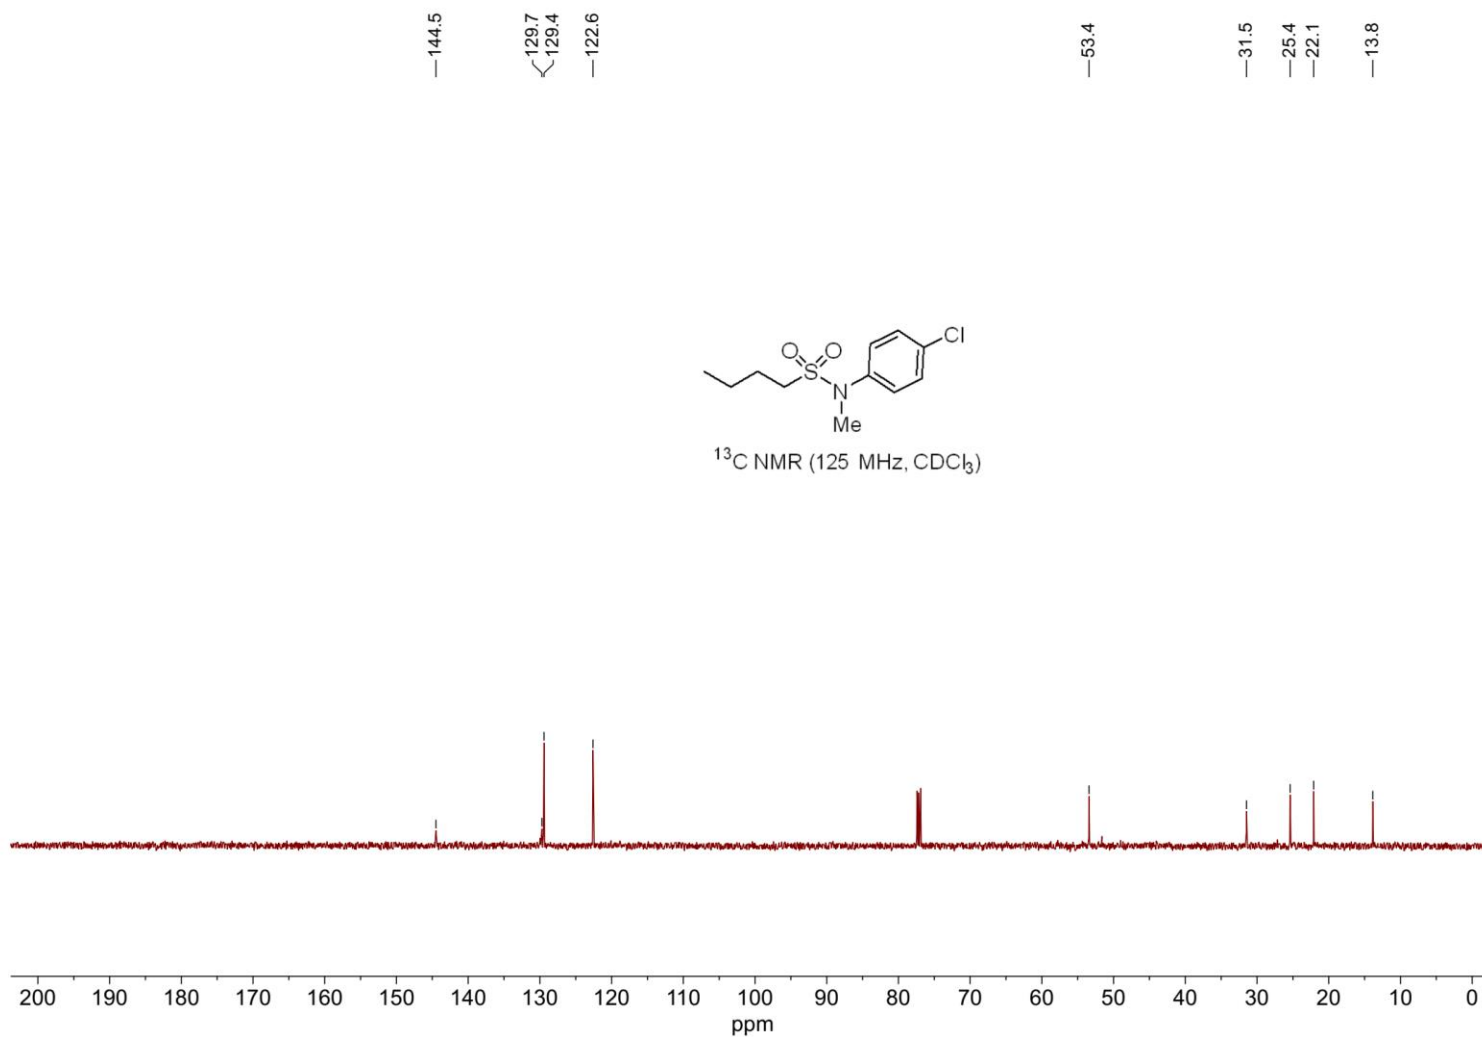

# 1-((4,4-Difluorocyclohexyl)sulfonyl)indoline (8u)

7.64  
7.63  
7.43  
7.43  
7.42  
7.42  
7.40  
7.40  
7.39  
7.38  
7.38  
7.37  
7.36  
7.35  
4.00  
3.98  
3.97  
3.34  
3.33  
3.31  
2.69  
2.68  
2.67  
2.66  
2.65  
2.64  
2.63  
2.11  
2.11  
2.10  
2.09  
2.08  
2.08  
2.07  
2.07  
2.06  
2.05  
1.74  
1.73  
1.72  
1.71  
1.69  
1.68  
1.67  
1.66  
1.64  
1.63  
1.62  
1.61  
1.60  
1.59  
1.58

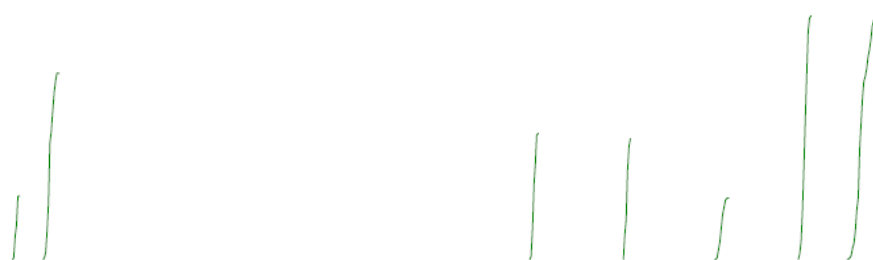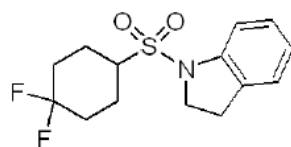

<sup>1</sup>H NMR (500 MHz, CDCl<sub>3</sub>)

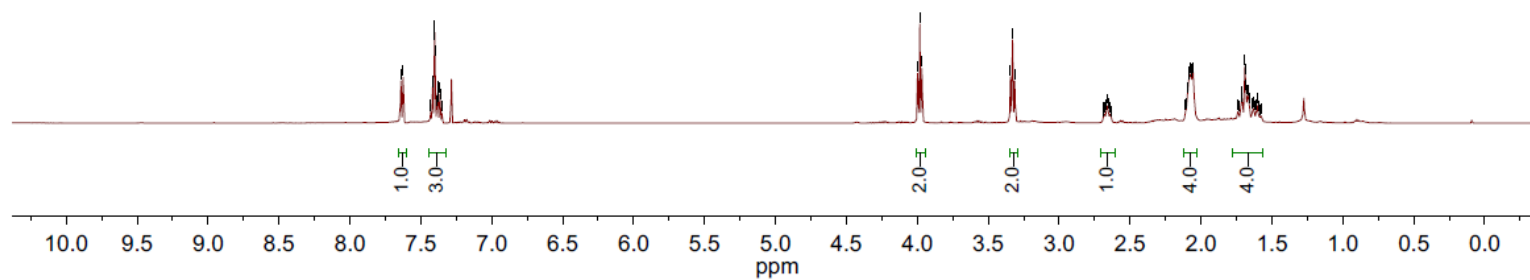



## 1-((4,4-Difluorocyclohexyl)sulfonyl)indoline (8u)

136.1  
135.0  
129.8  
128.4  
125.8  
124.6  
122.6  
120.7  
120.0

56.4

46.0

32.7  
32.5  
32.3  
29.3  
24.0  
24.0

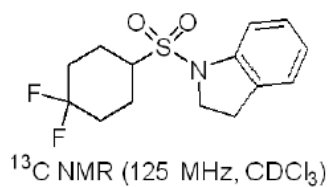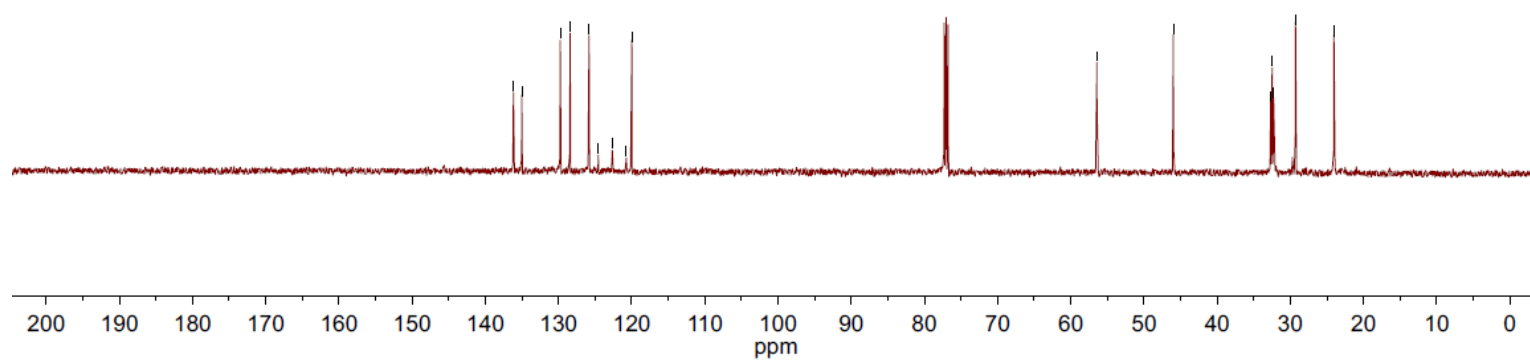

***tert*-Butyl 4-(*N*-(3,4,5-trimethylphenyl)sulfamoyl)piperidine-1-carboxylate (8v)**

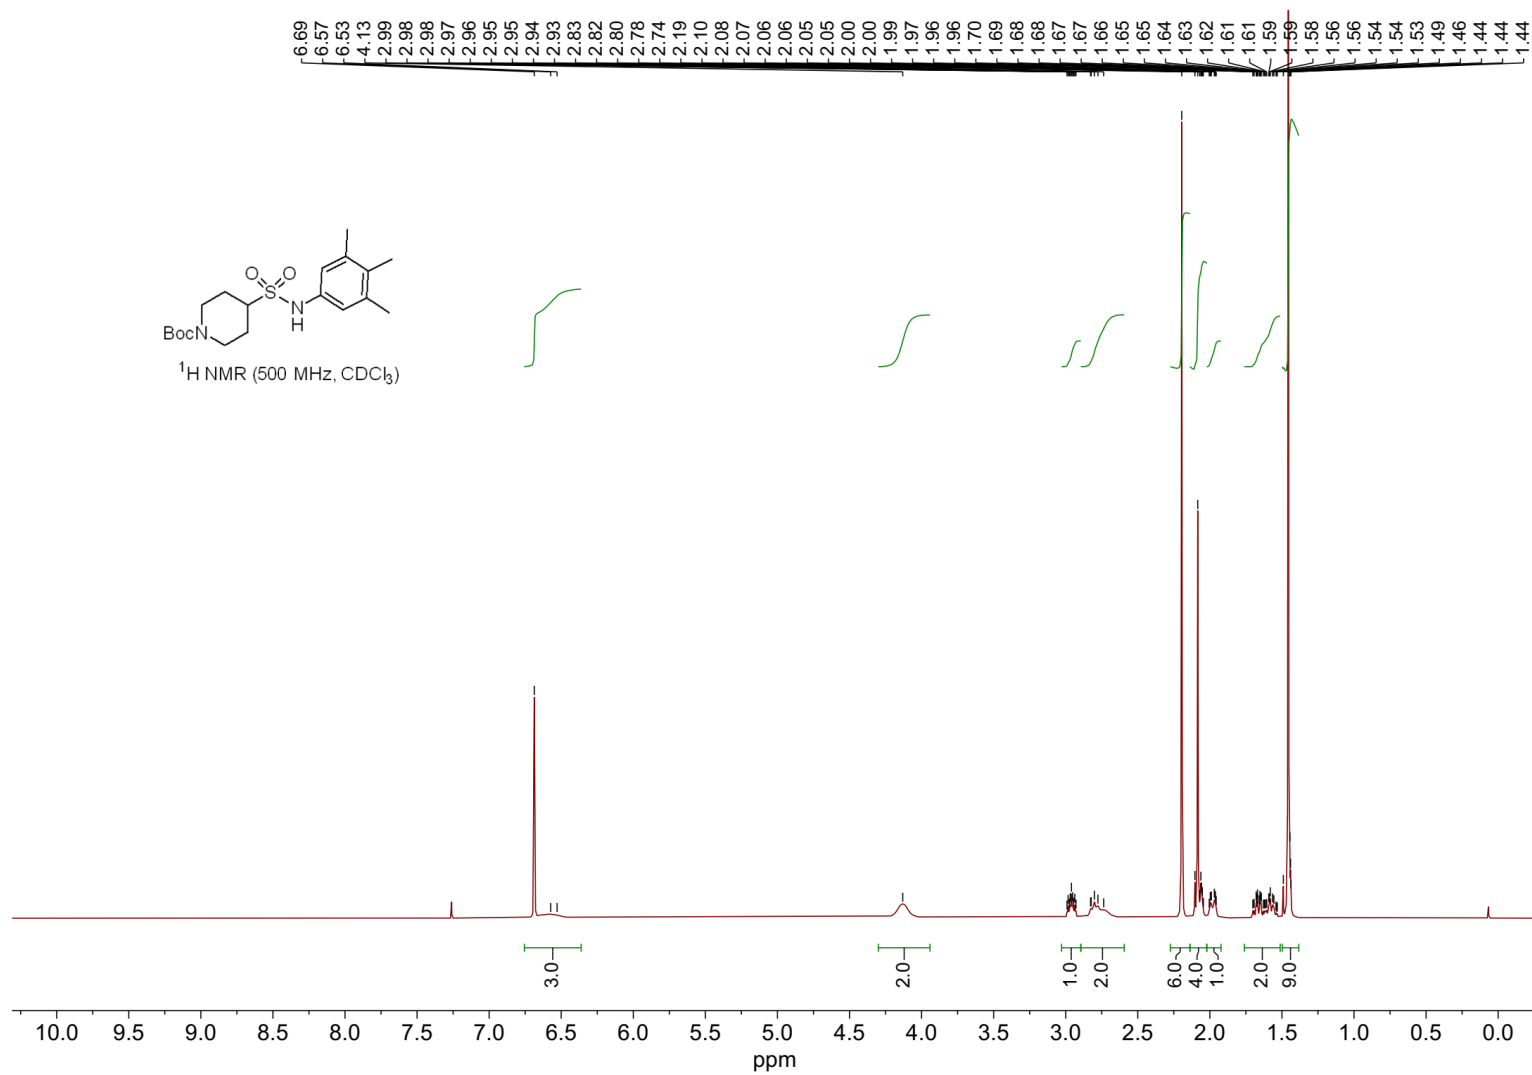

***tert*-Butyl 4-(*N*-(3,4,5-trimethylphenyl)sulfamoyl)piperidine-1-carboxylate (8v)**

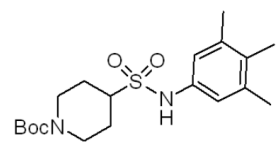

<sup>13</sup>C NMR (125 MHz, CDCl<sub>3</sub>)

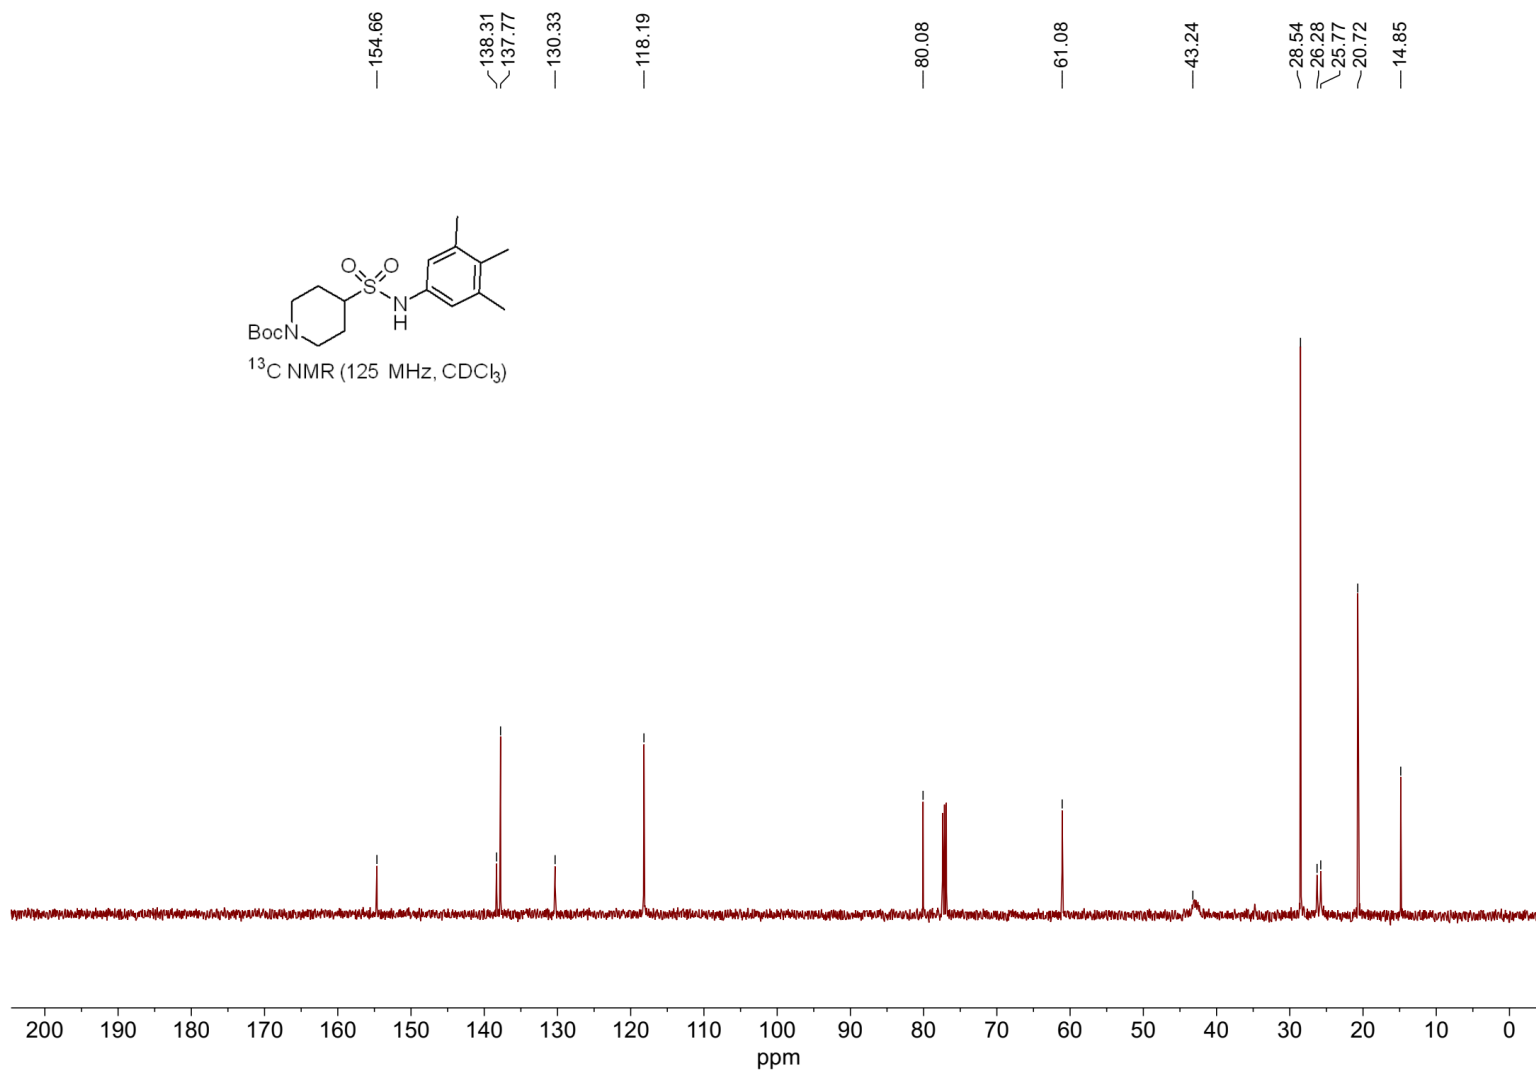

# ***N*-(2-methylbenzo[d]thiazol-6-yl)butane-1-sulfonamide (8w)**

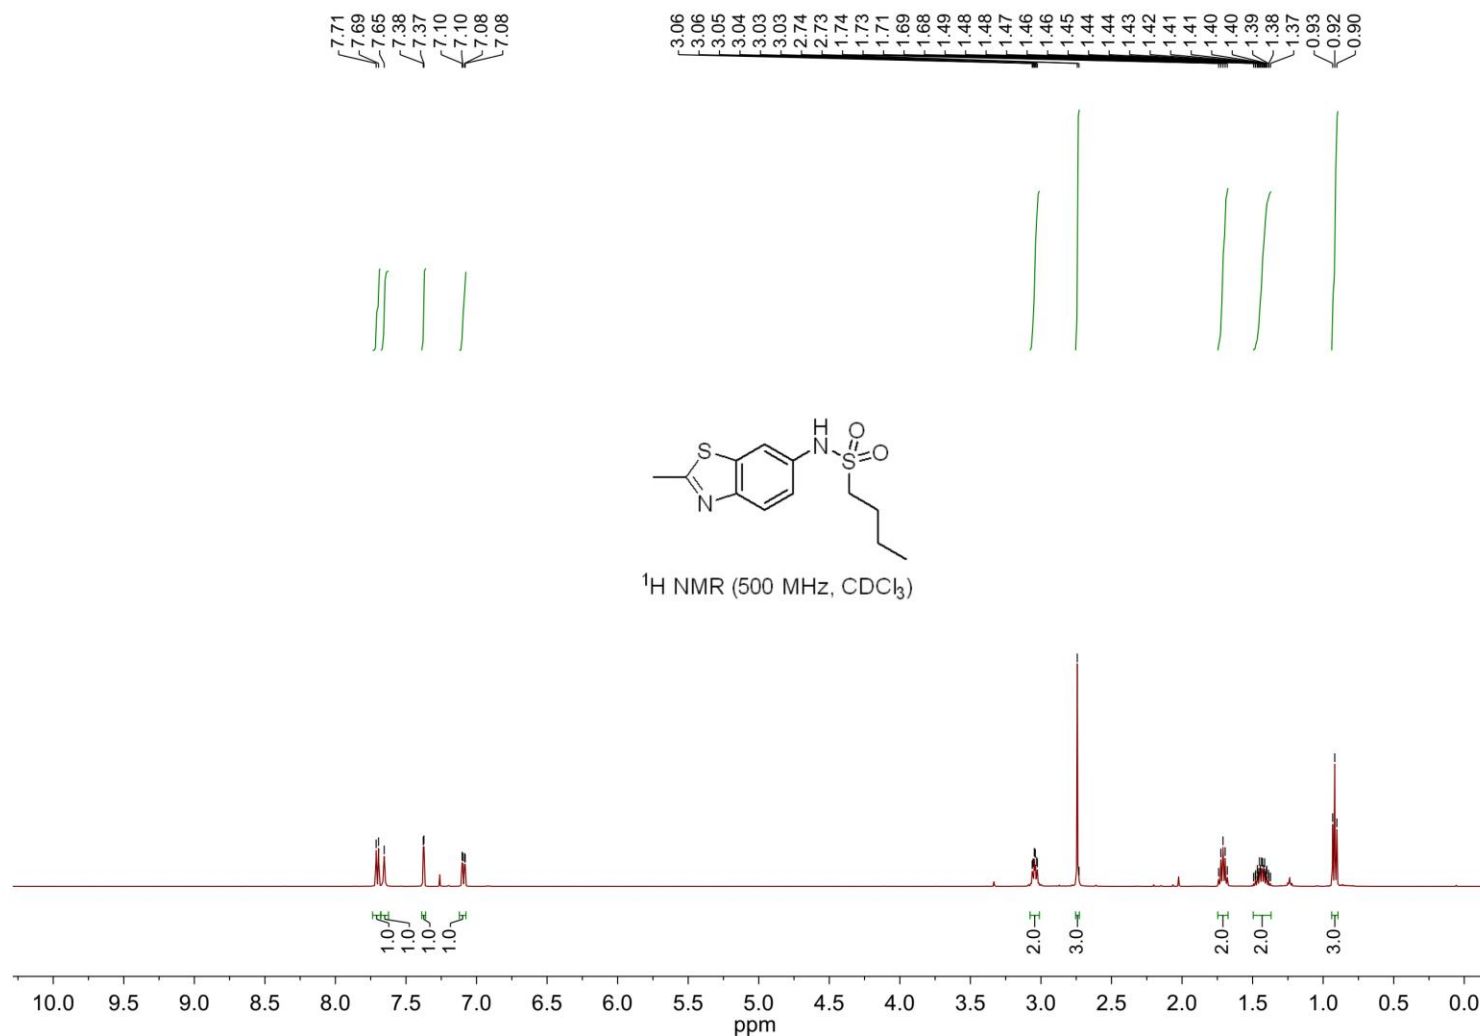

# ***N*-(2-methylbenzo[d]thiazol-6-yl)butane-1-sulfonamide (8w)**

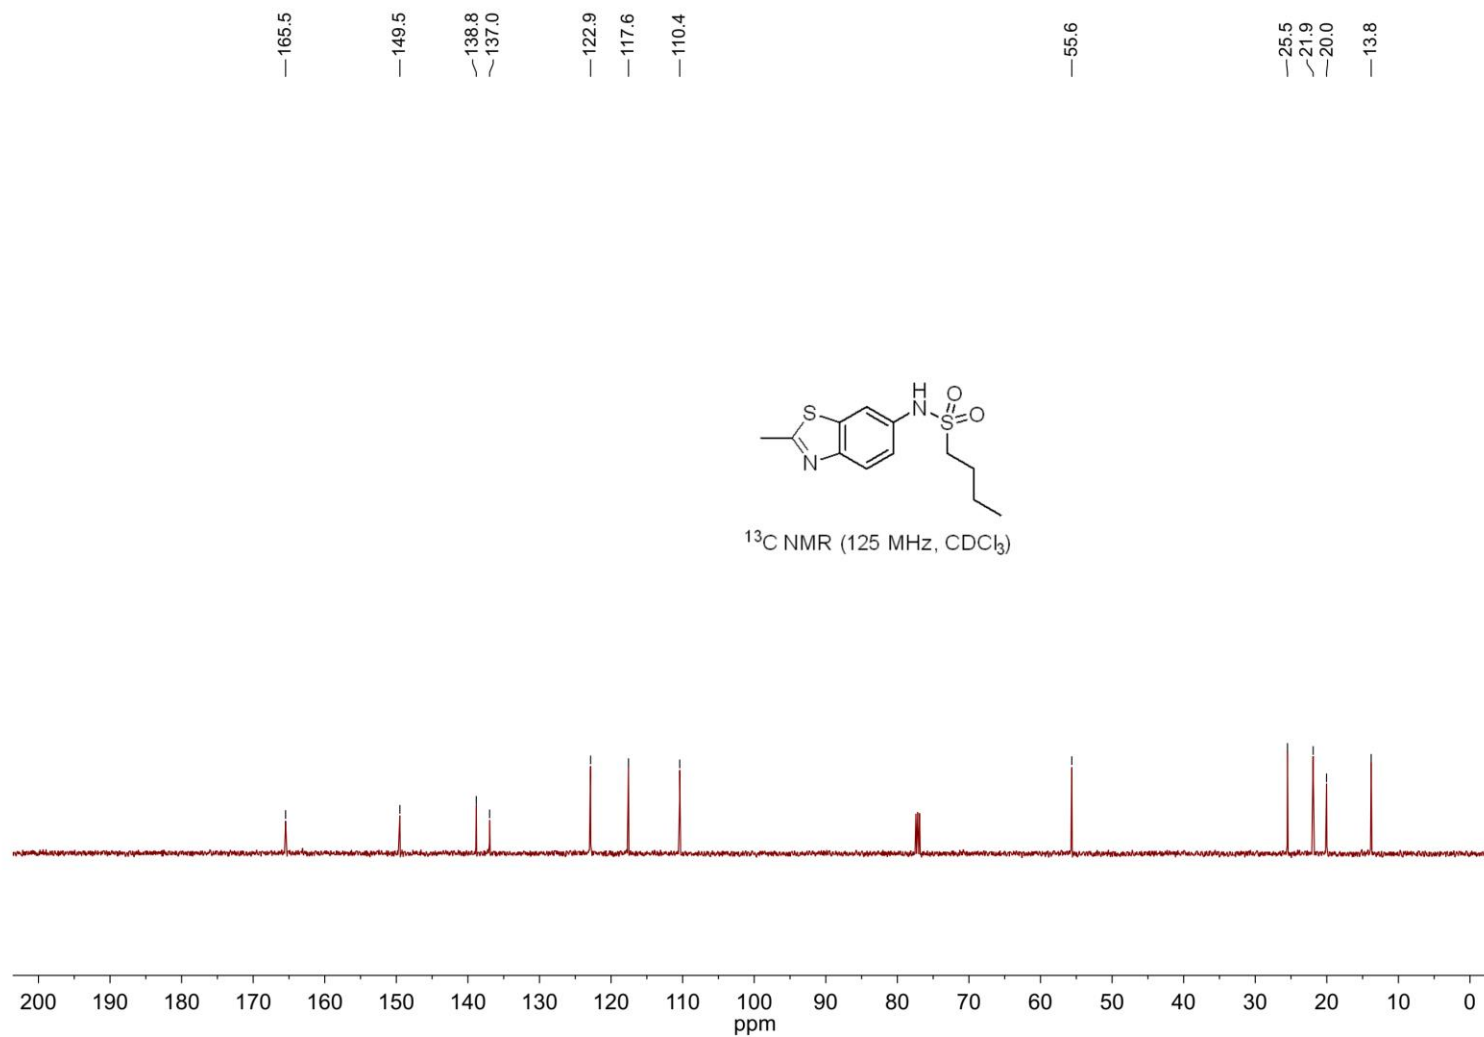

1-((3,3,3-Trifluoropropyl)sulfonyl)indoline (8x)

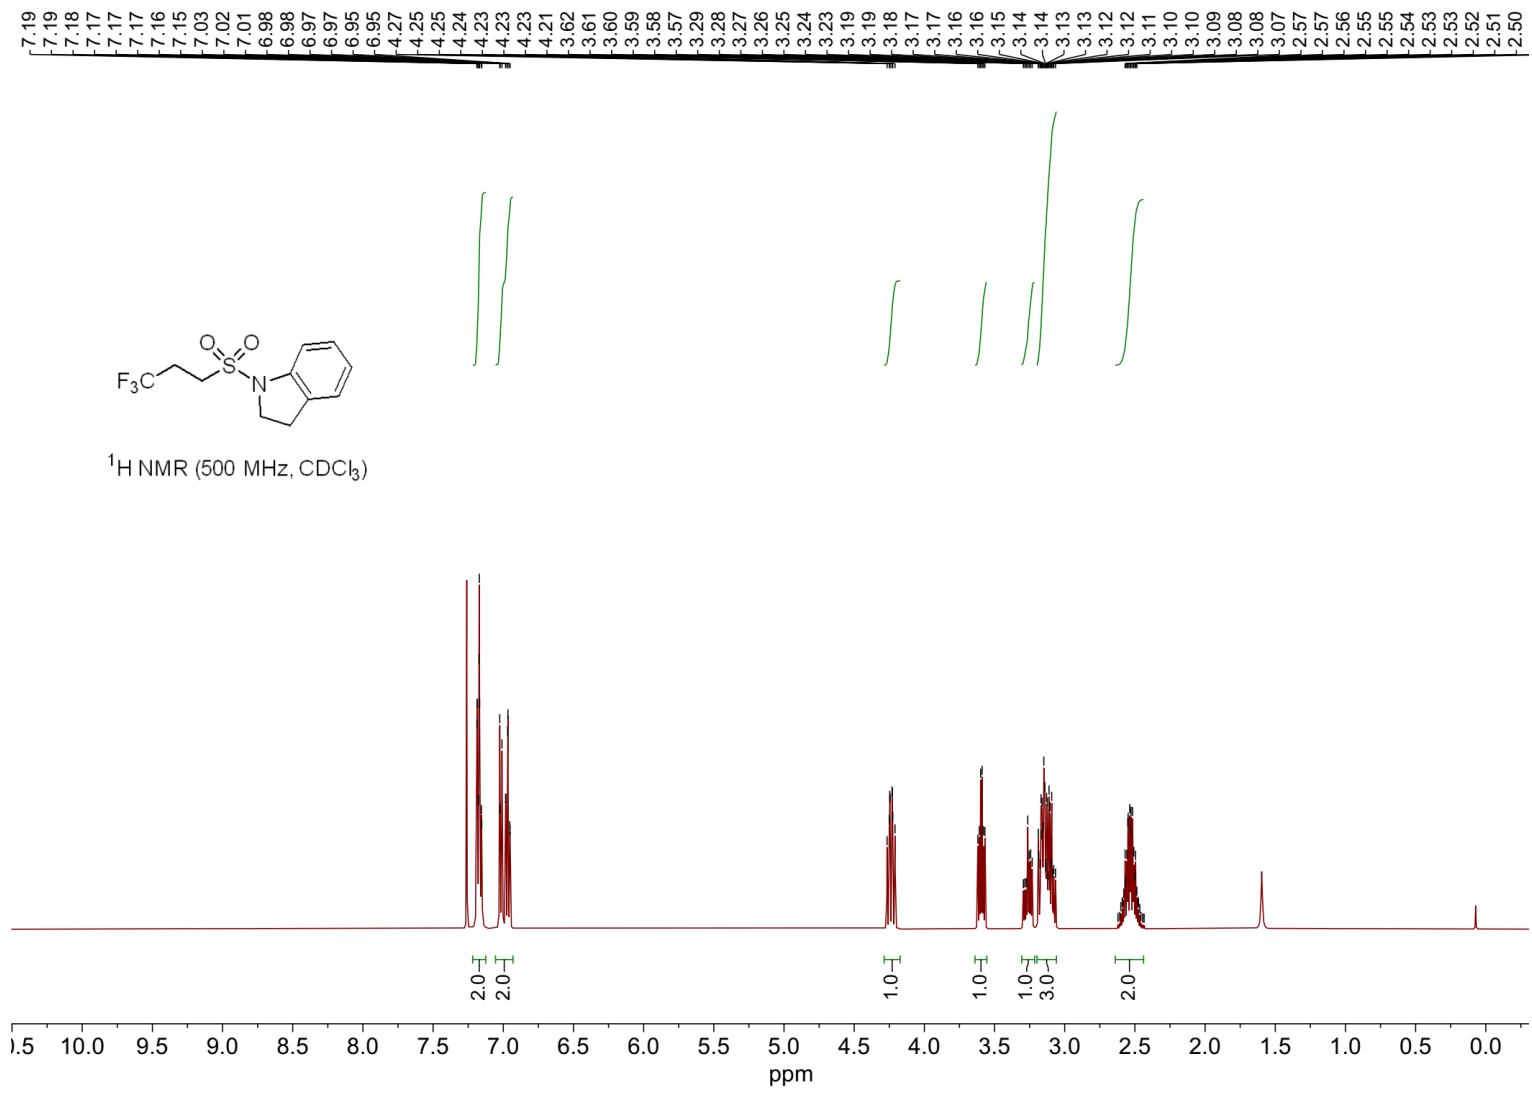

## 1-((3,3,3-Trifluoropropyl)sulfonyl)indoline (8x)

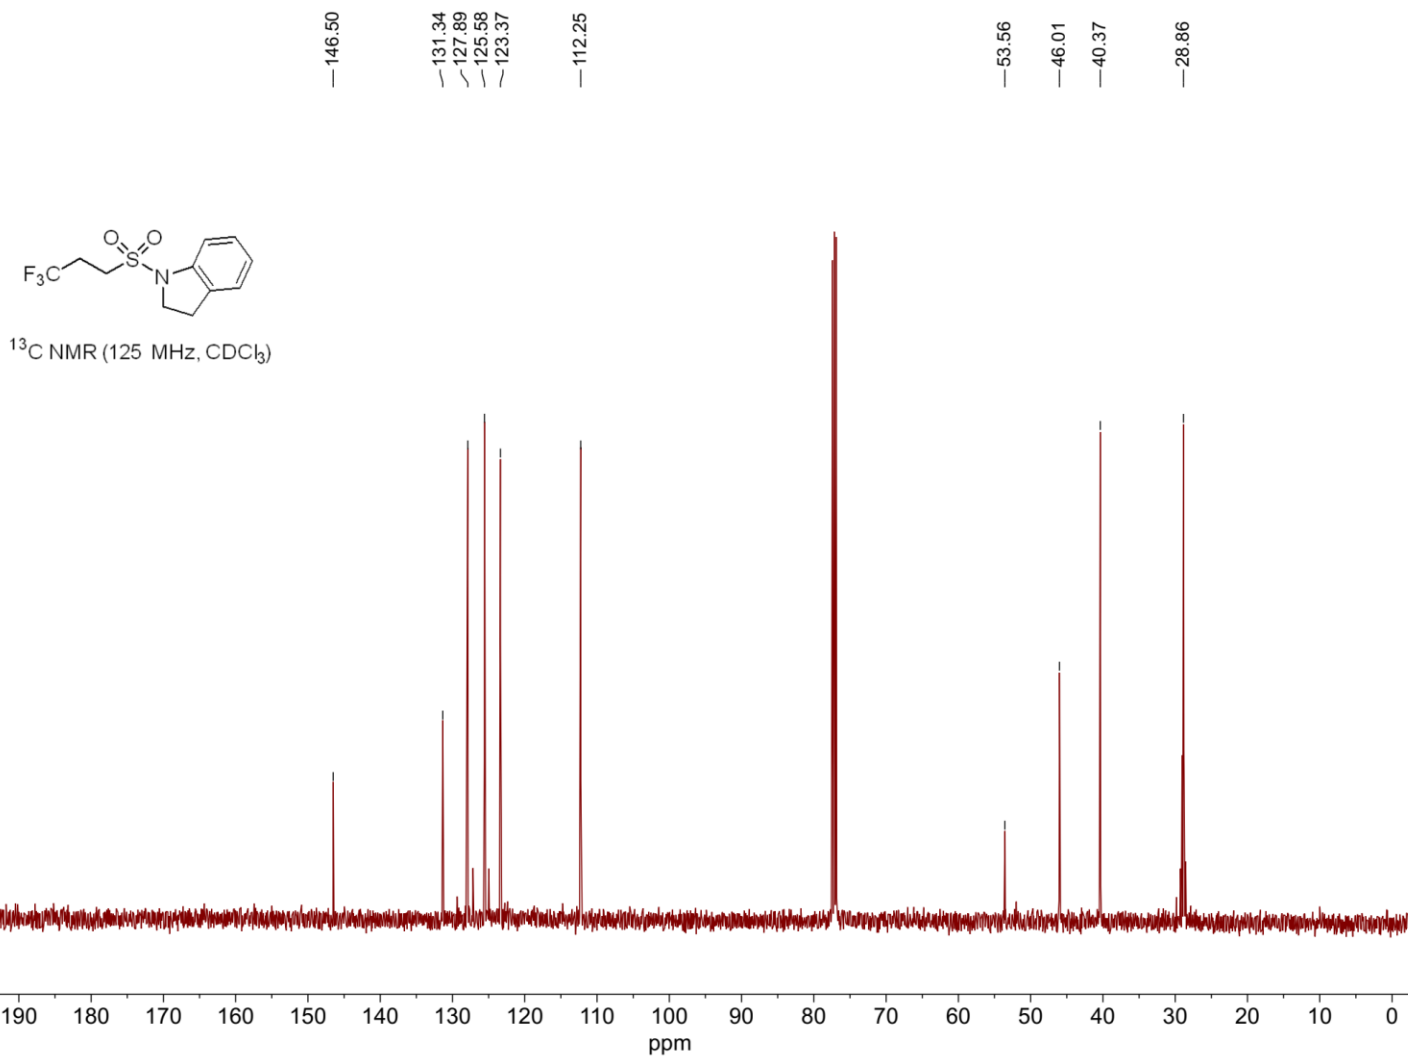





## 2-(3,4-Dimethoxyphenyl)ethane-1-sulfonyl azide (9a)

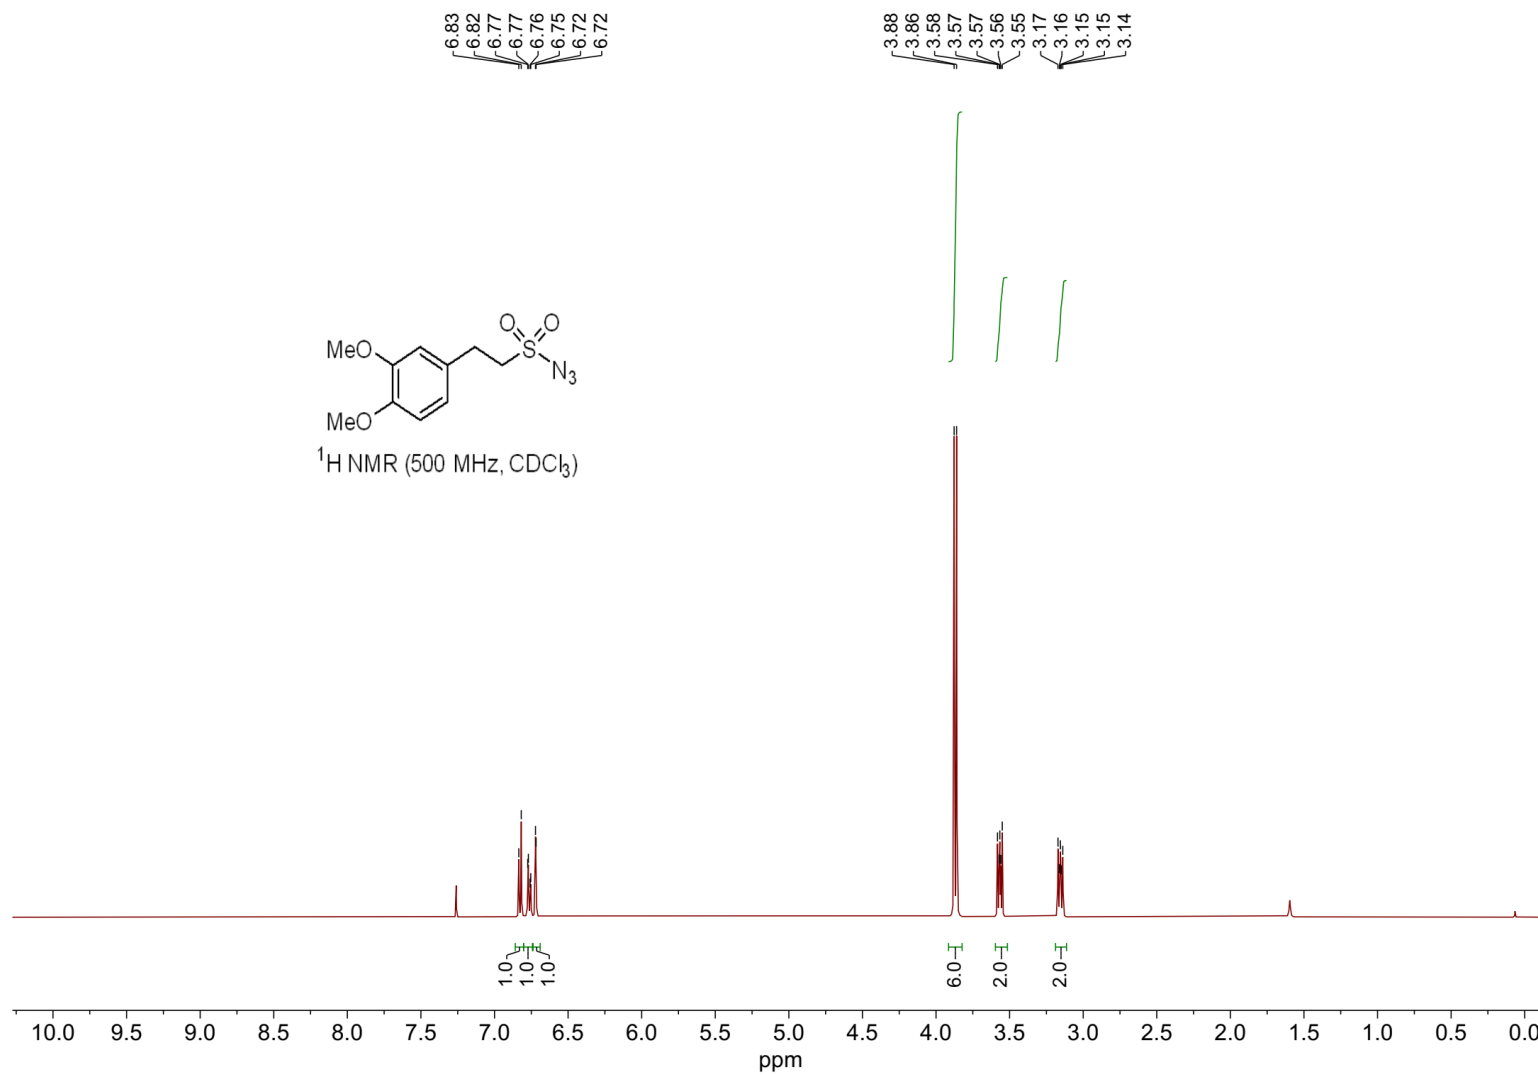

## 2-(3,4-Dimethoxyphenyl)ethane-1-sulfonyl azide (9a)

149.45  
148.48  
128.83  
120.54  
111.74  
111.63  
57.39  
56.06  
29.34

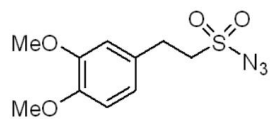

$^{13}\text{C}$  NMR (125 MHz,  $\text{CDCl}_3$ )

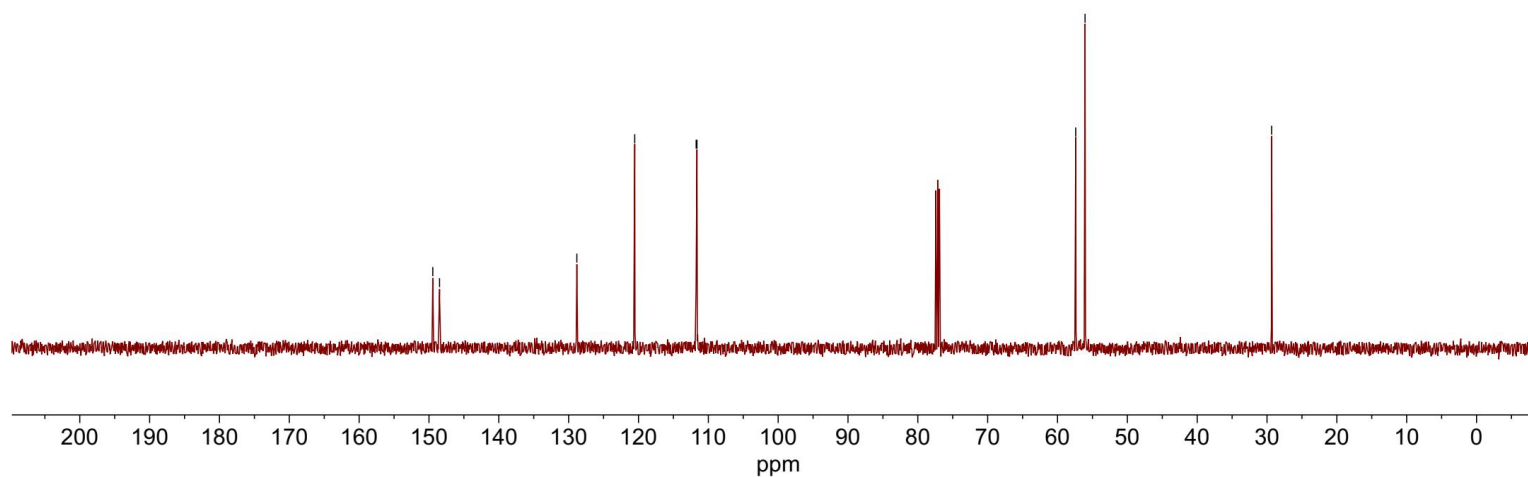

## 4-Oxo-4-phenylbutane-1-sulfonyl azide (9b)

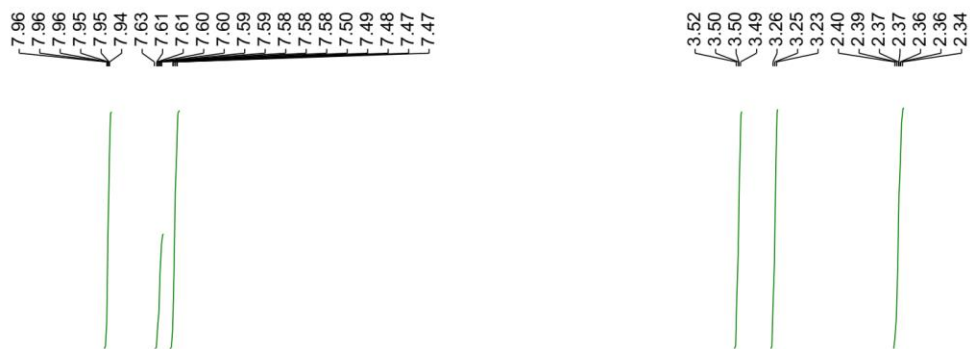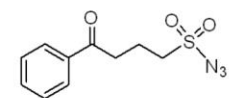

<sup>1</sup>H NMR (500 MHz, CDCl<sub>3</sub>)

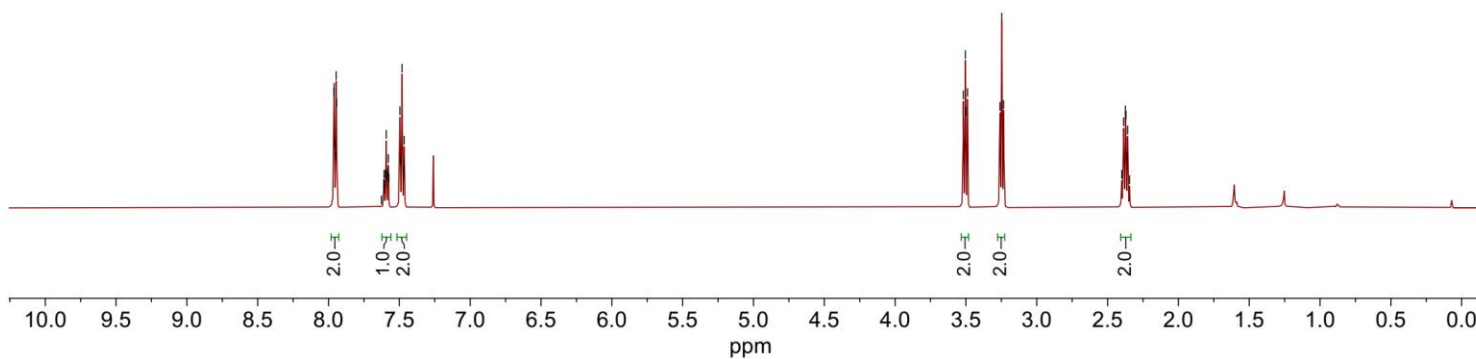

## 4-Oxo-4-phenylbutane-1-sulfonyl azide (9b)

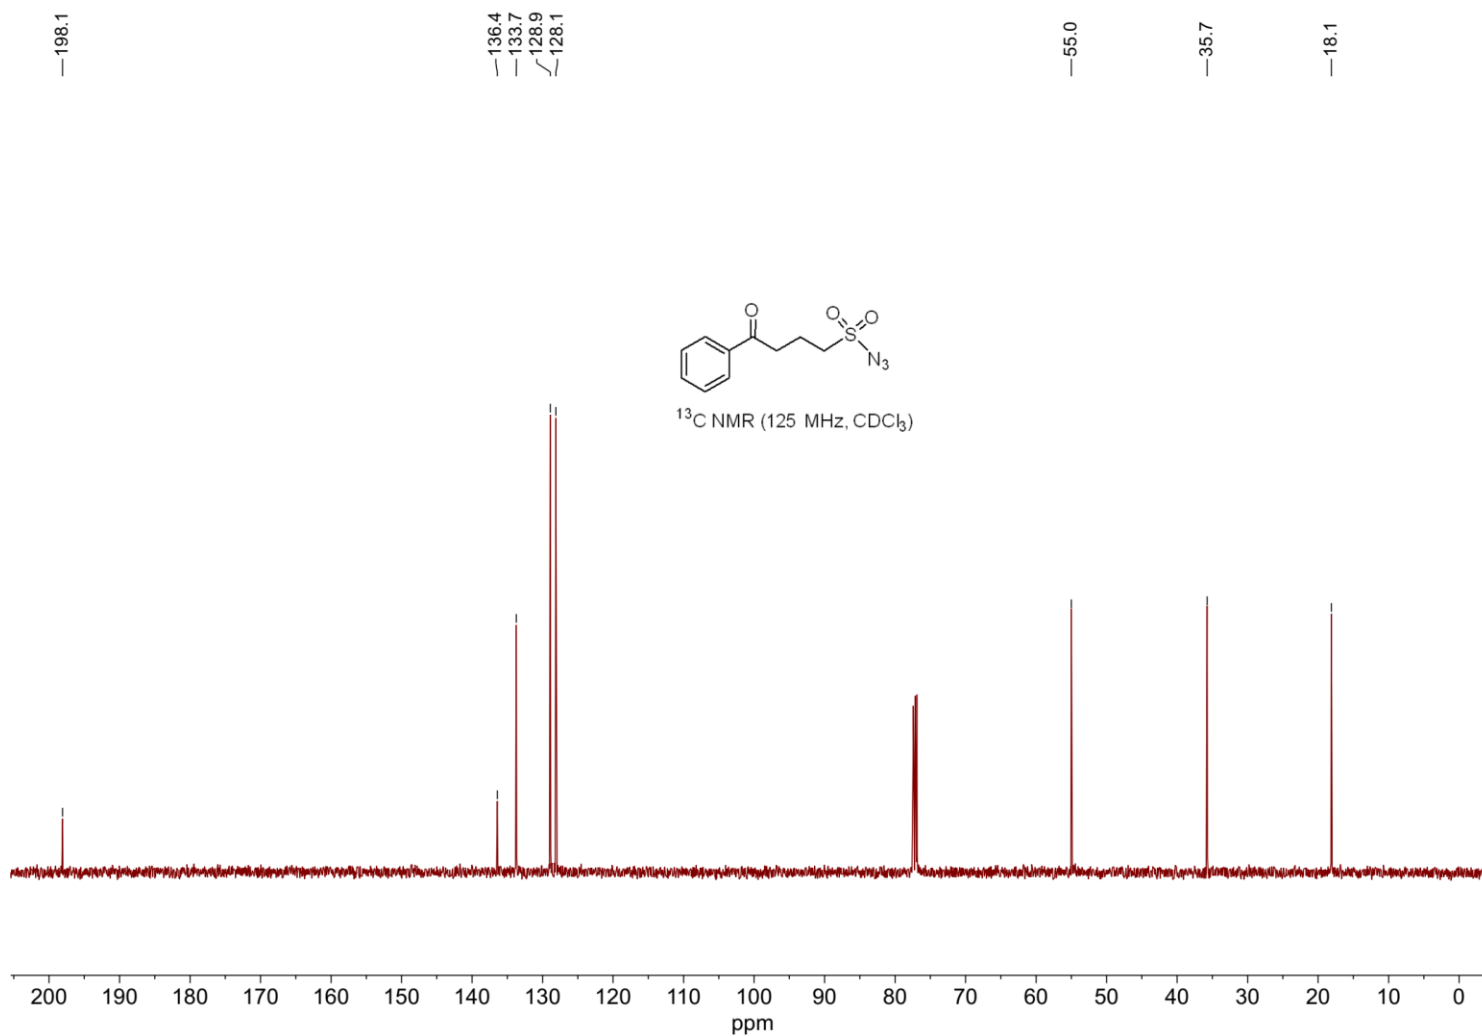

# Methyl 5-(azidosulfonyl)pentanoate (9c)

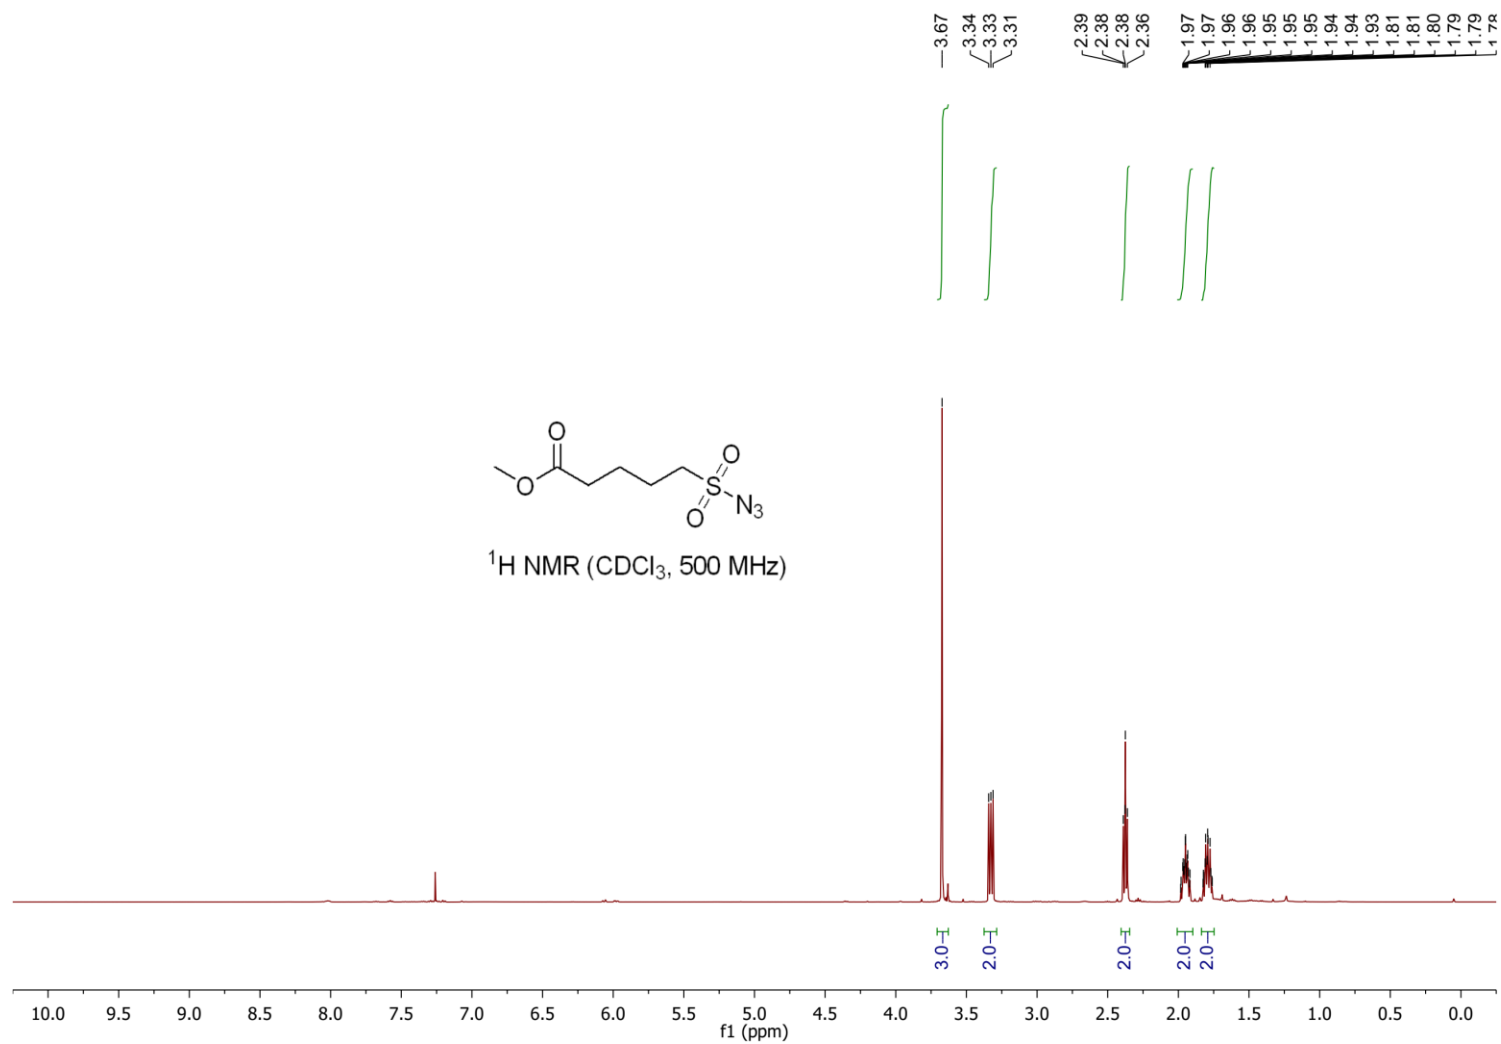

## Methyl 5-(azidosulfonyl)pentanoate (9c)

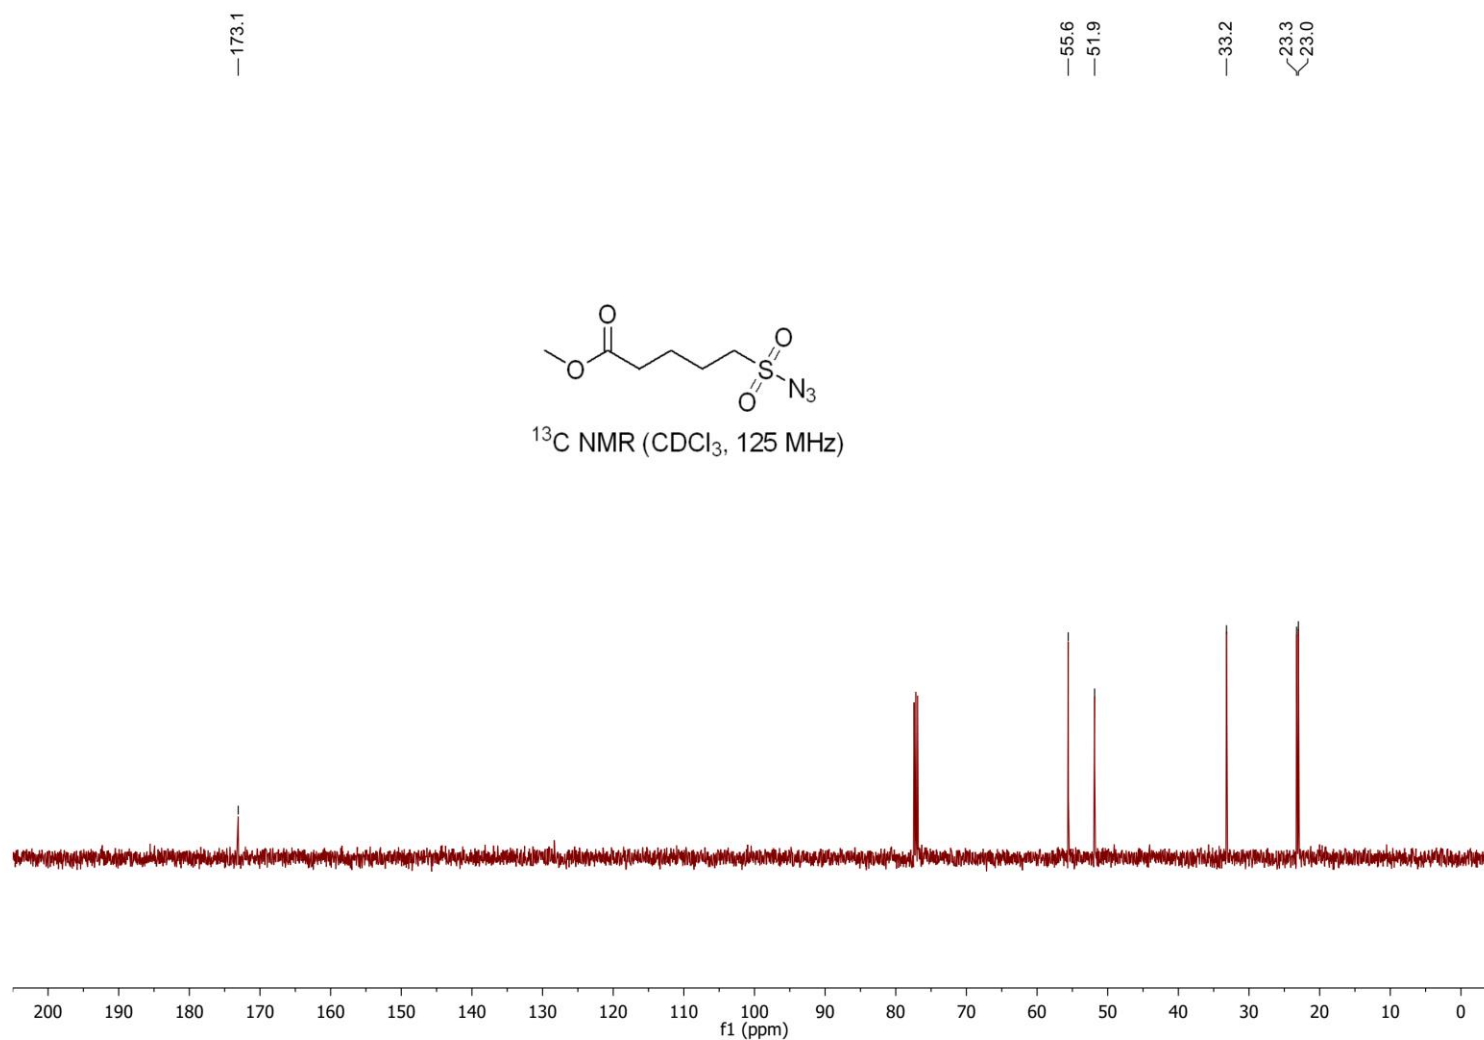

# 4-(5-Methylthiophen-2-yl)-4-oxobutane-1-sulfonyl azide (9d)

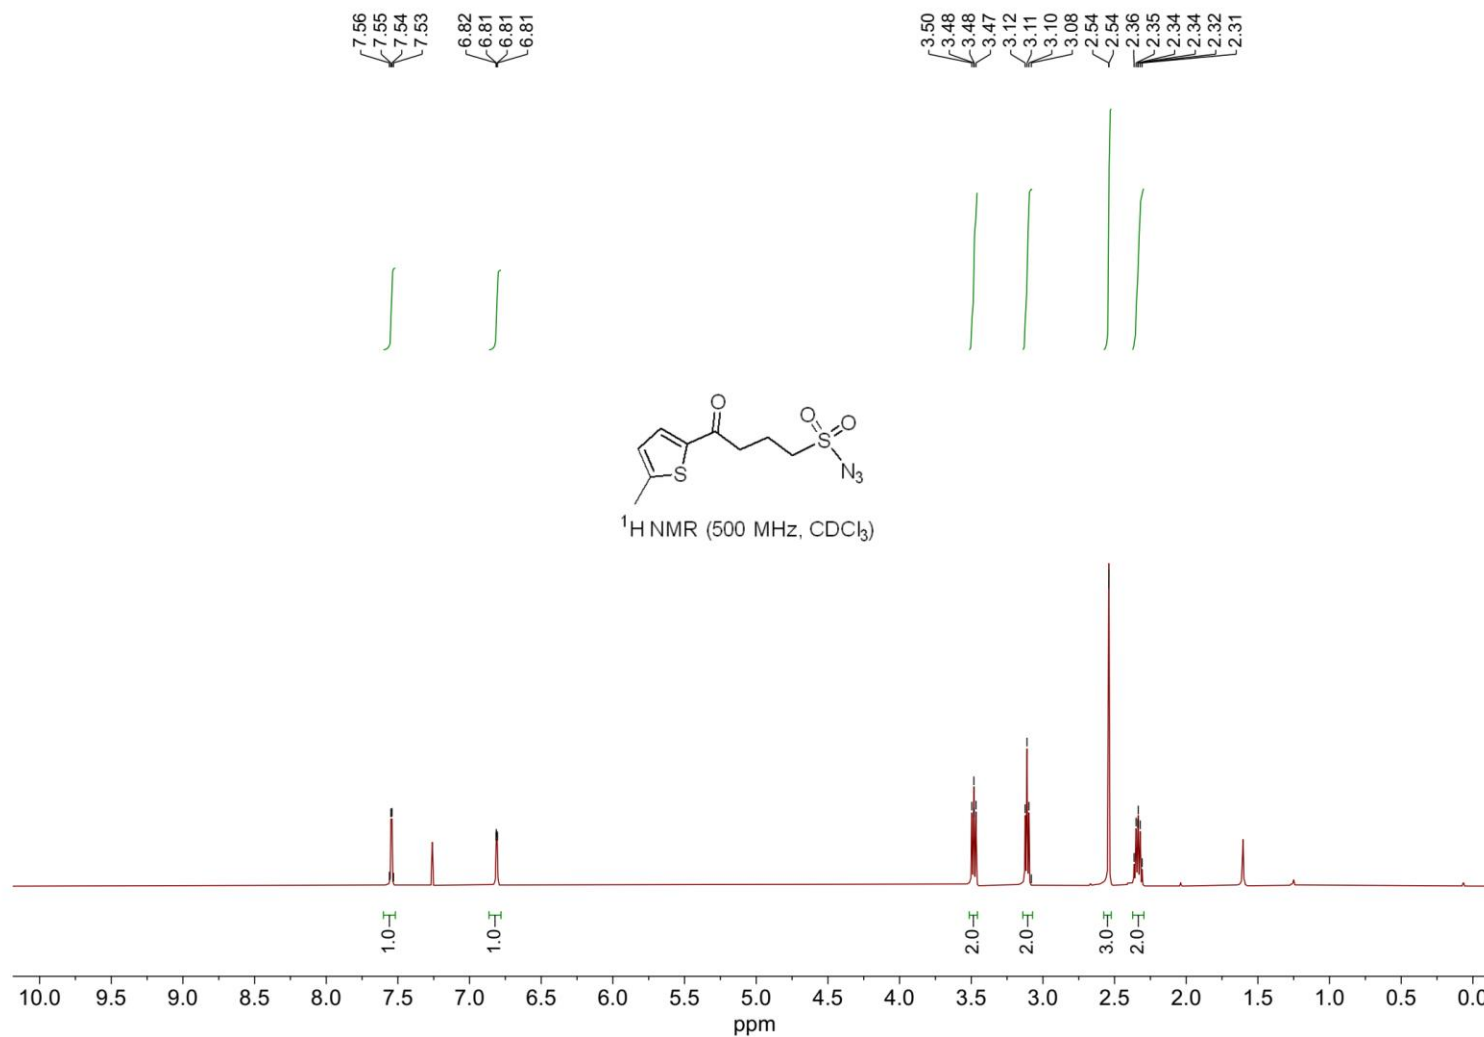

### 4-(5-Methylthiophen-2-yl)-4-oxobutane-1-sulfonyl azide (9d)

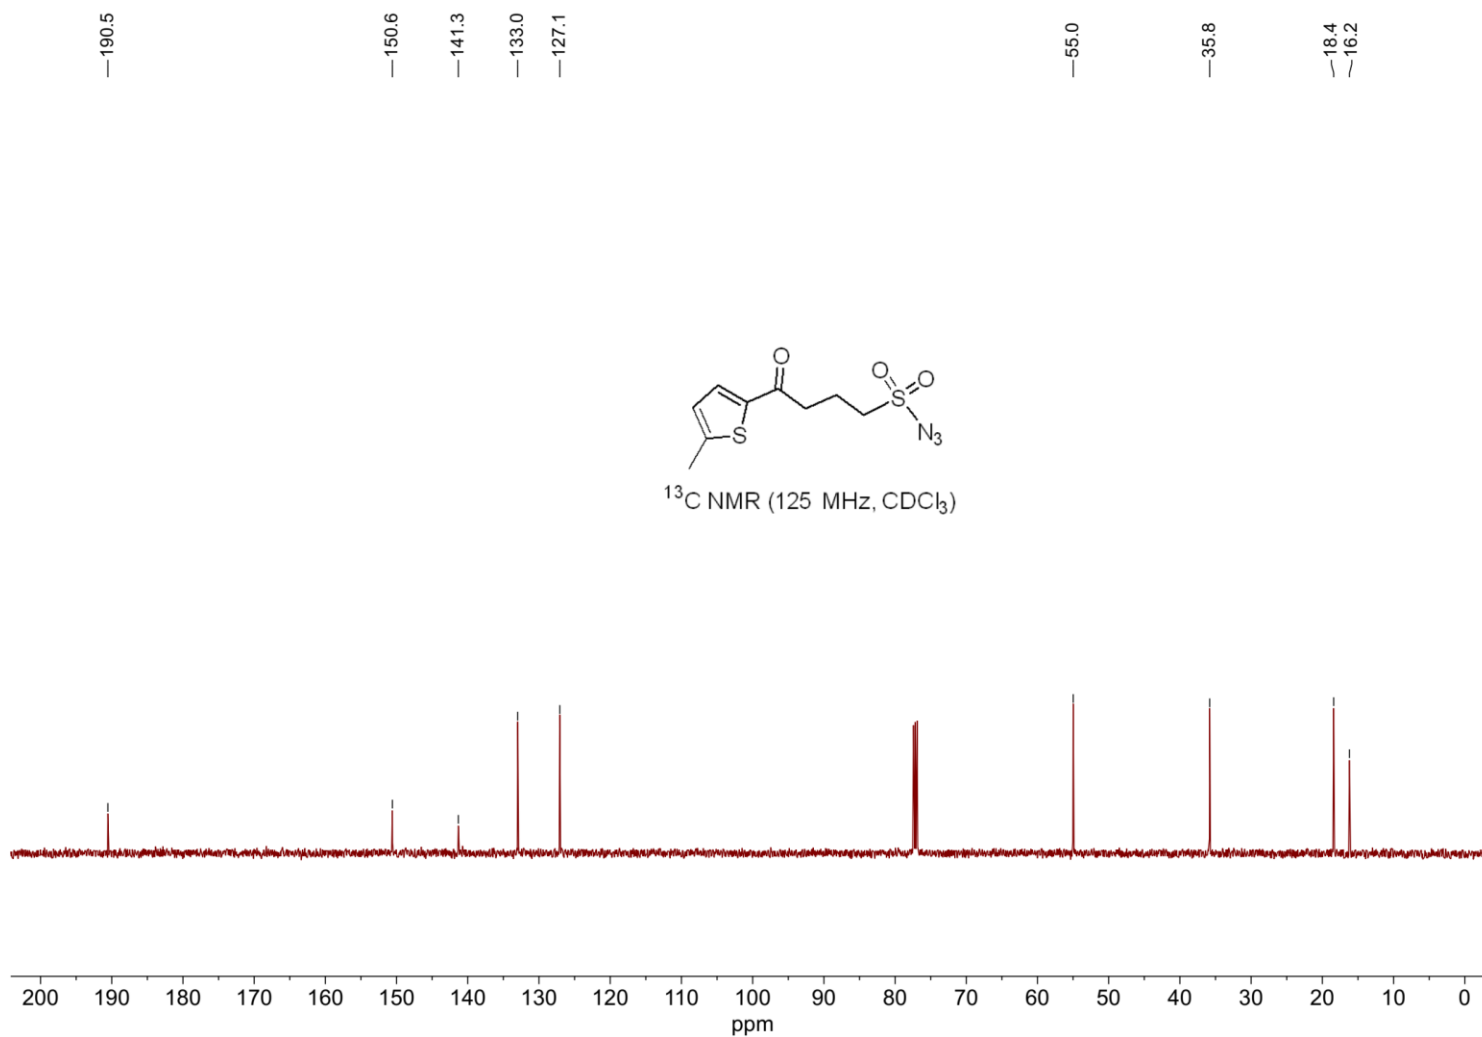



# 4-Oxo-4-((3-(4,4,5,5-tetramethyl-1,3,2-dioxaborolan-2-yl)phenyl)amino)butane-1-sulfonyl azide (9e)

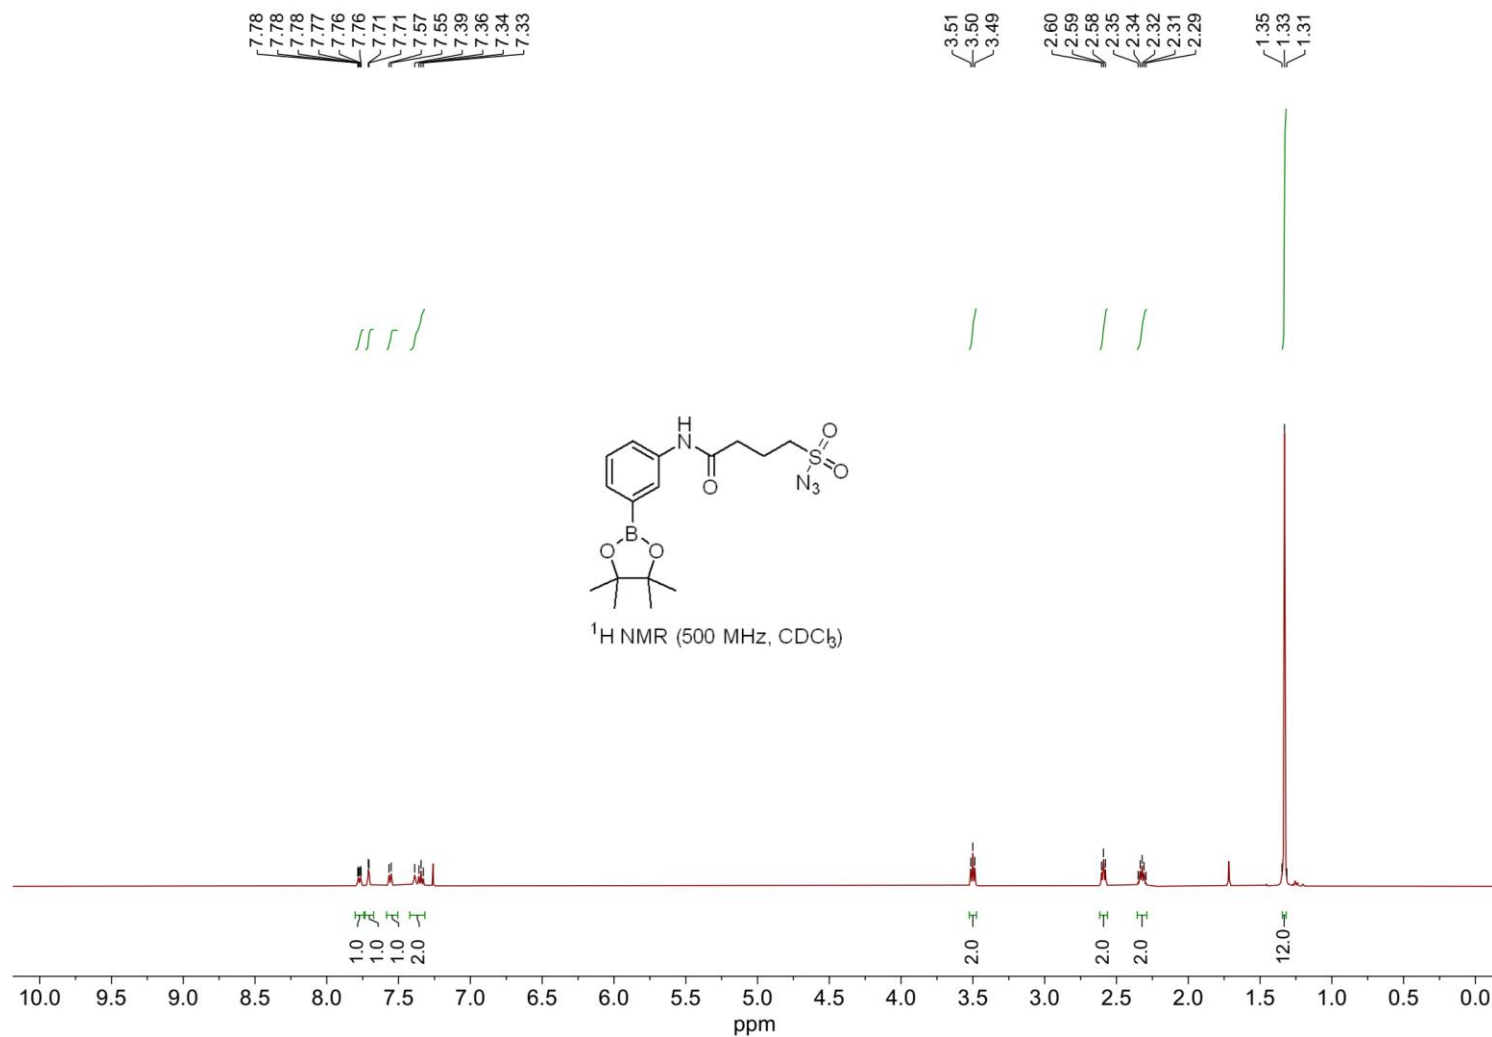

# 4-Oxo-4-((3-(4,4,5,5-tetramethyl-1,3,2-dioxaborolan-2-yl)phenyl)amino)butane-1-sulfonyl azide (9e)

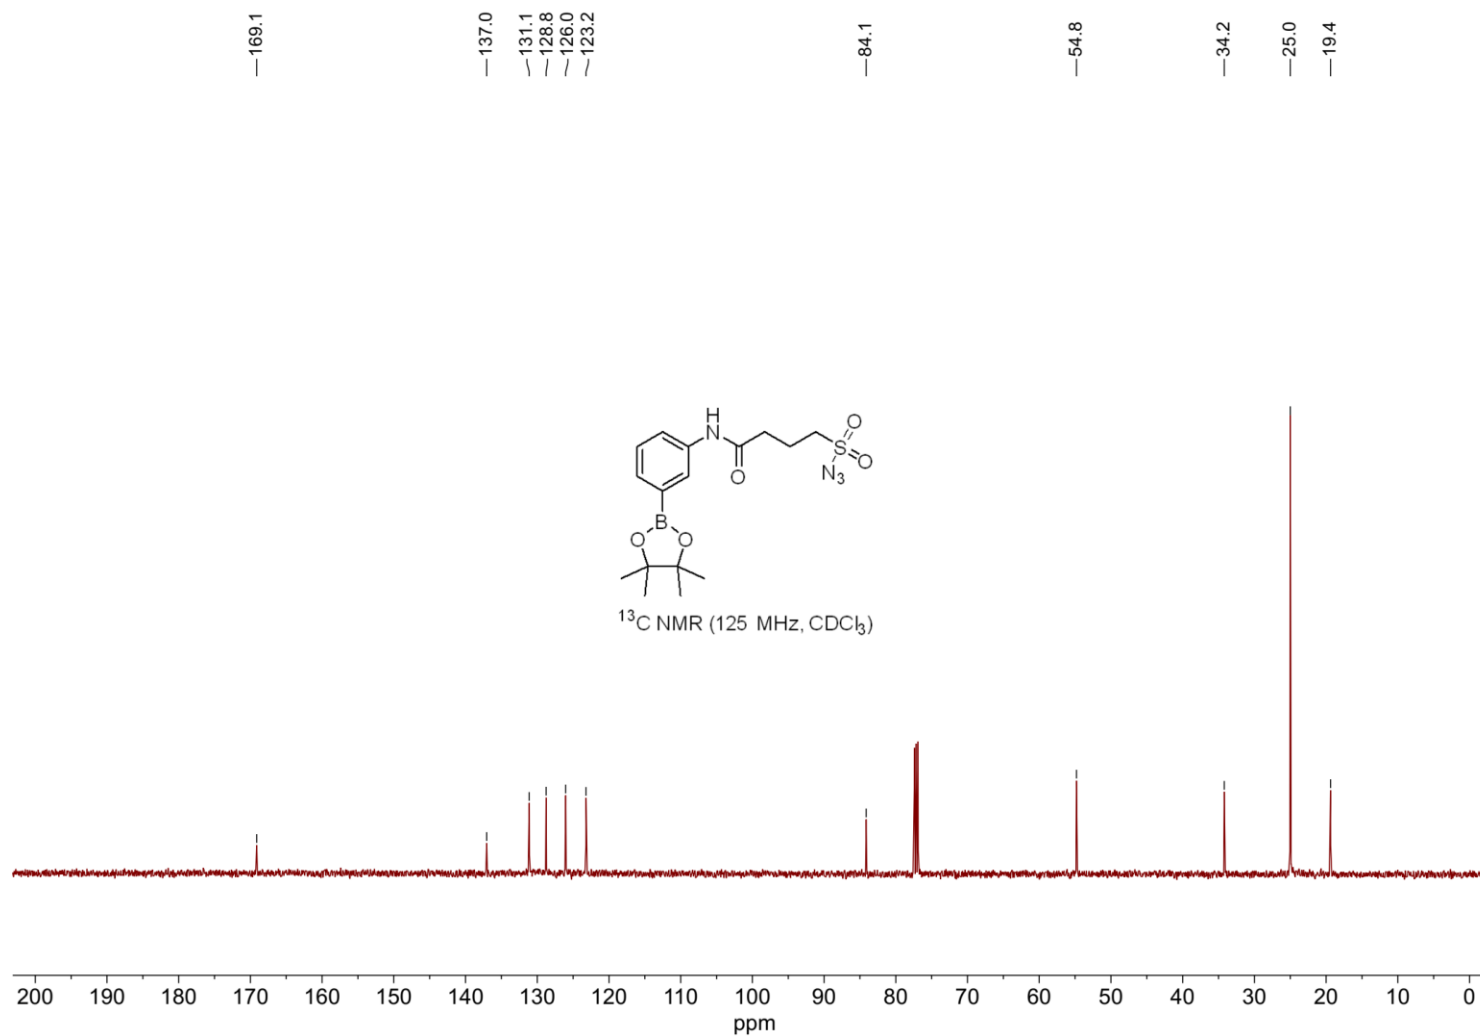

## 5-(4-Chlorobenzamido)pentane-1-sulfonyl azide (9f)

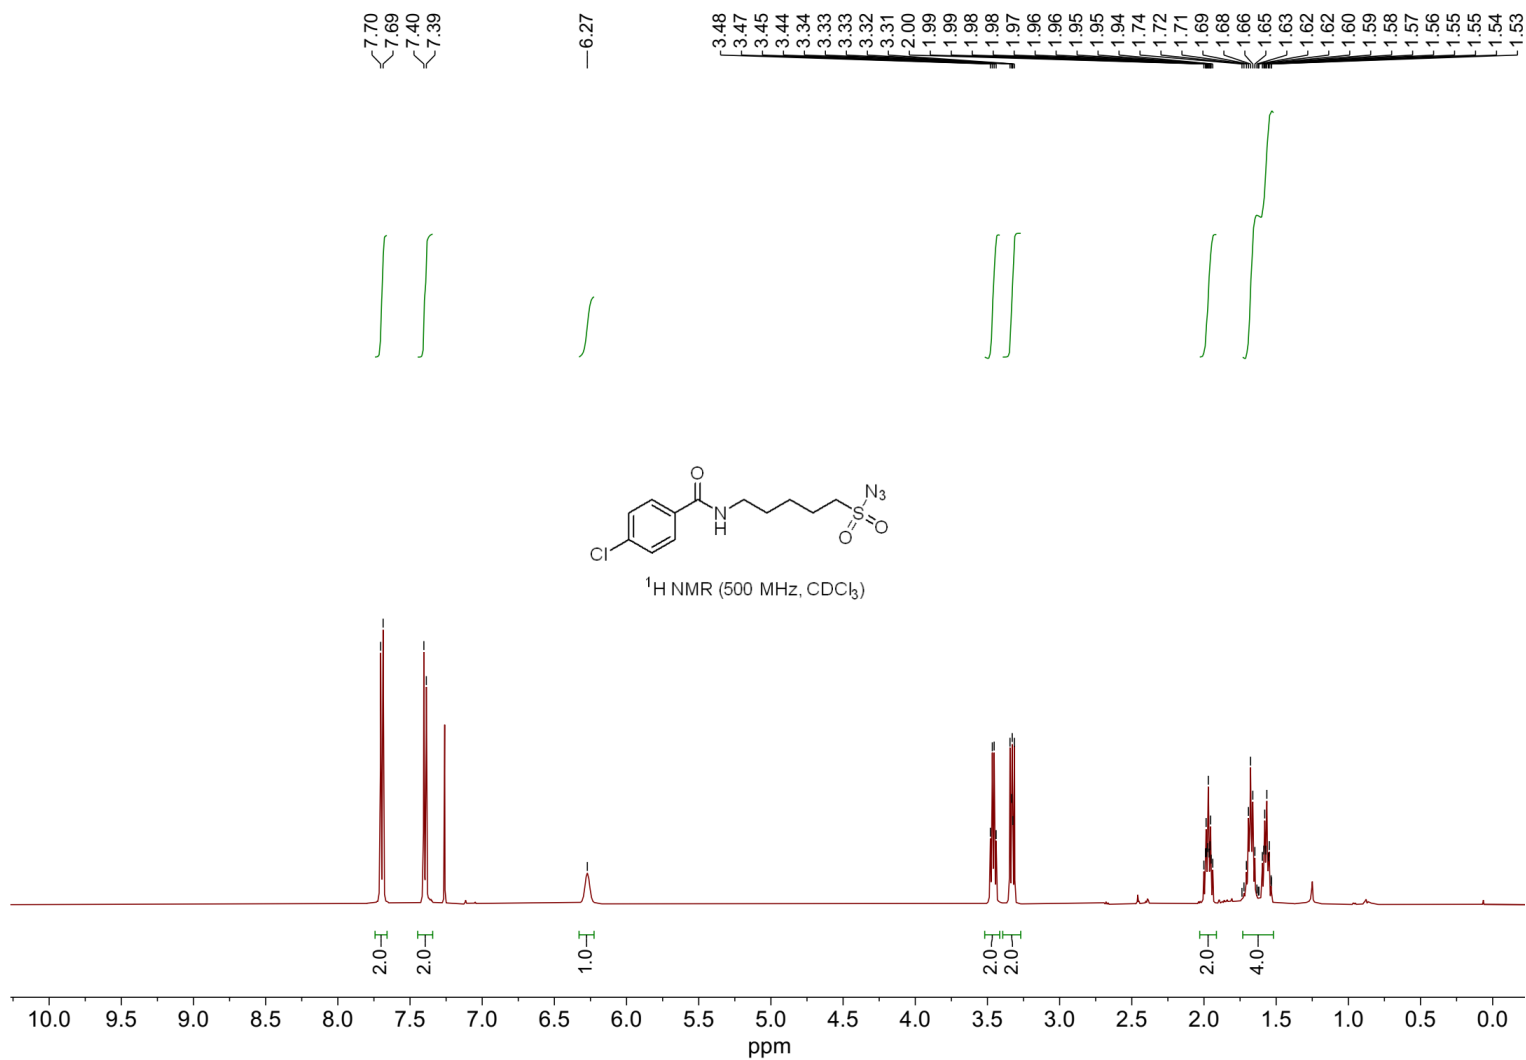

## 5-(4-Chlorobenzamido)pentane-1-sulfonyl azide (9f)

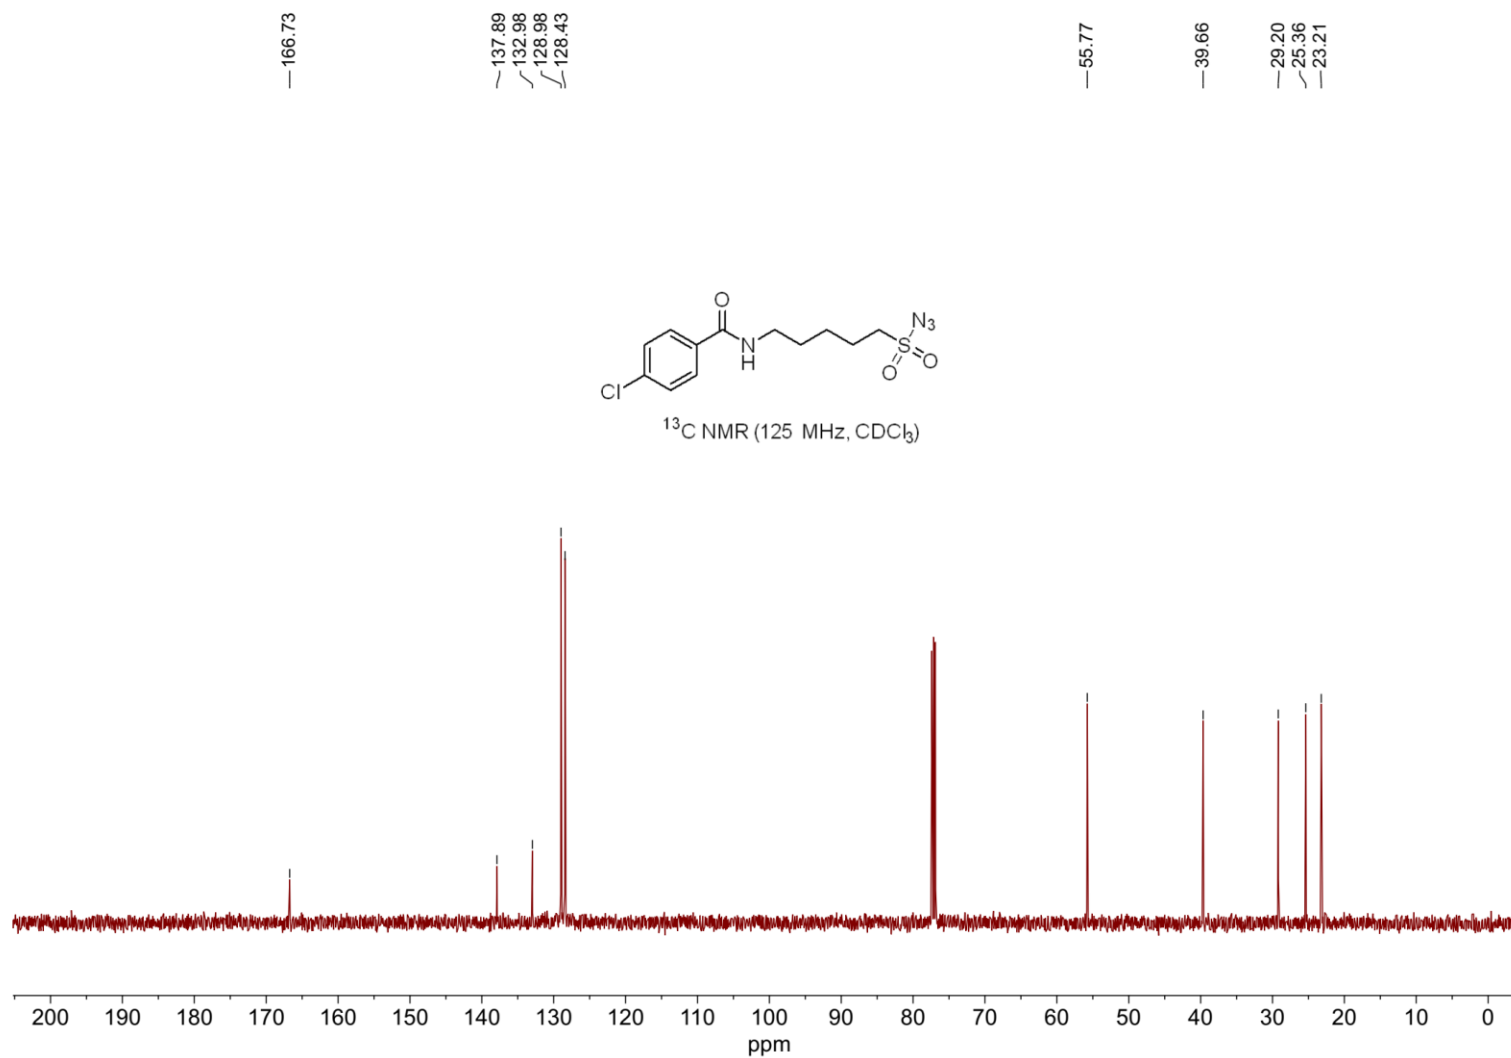

Pentadecane-1-sulfonyl azide (9g)

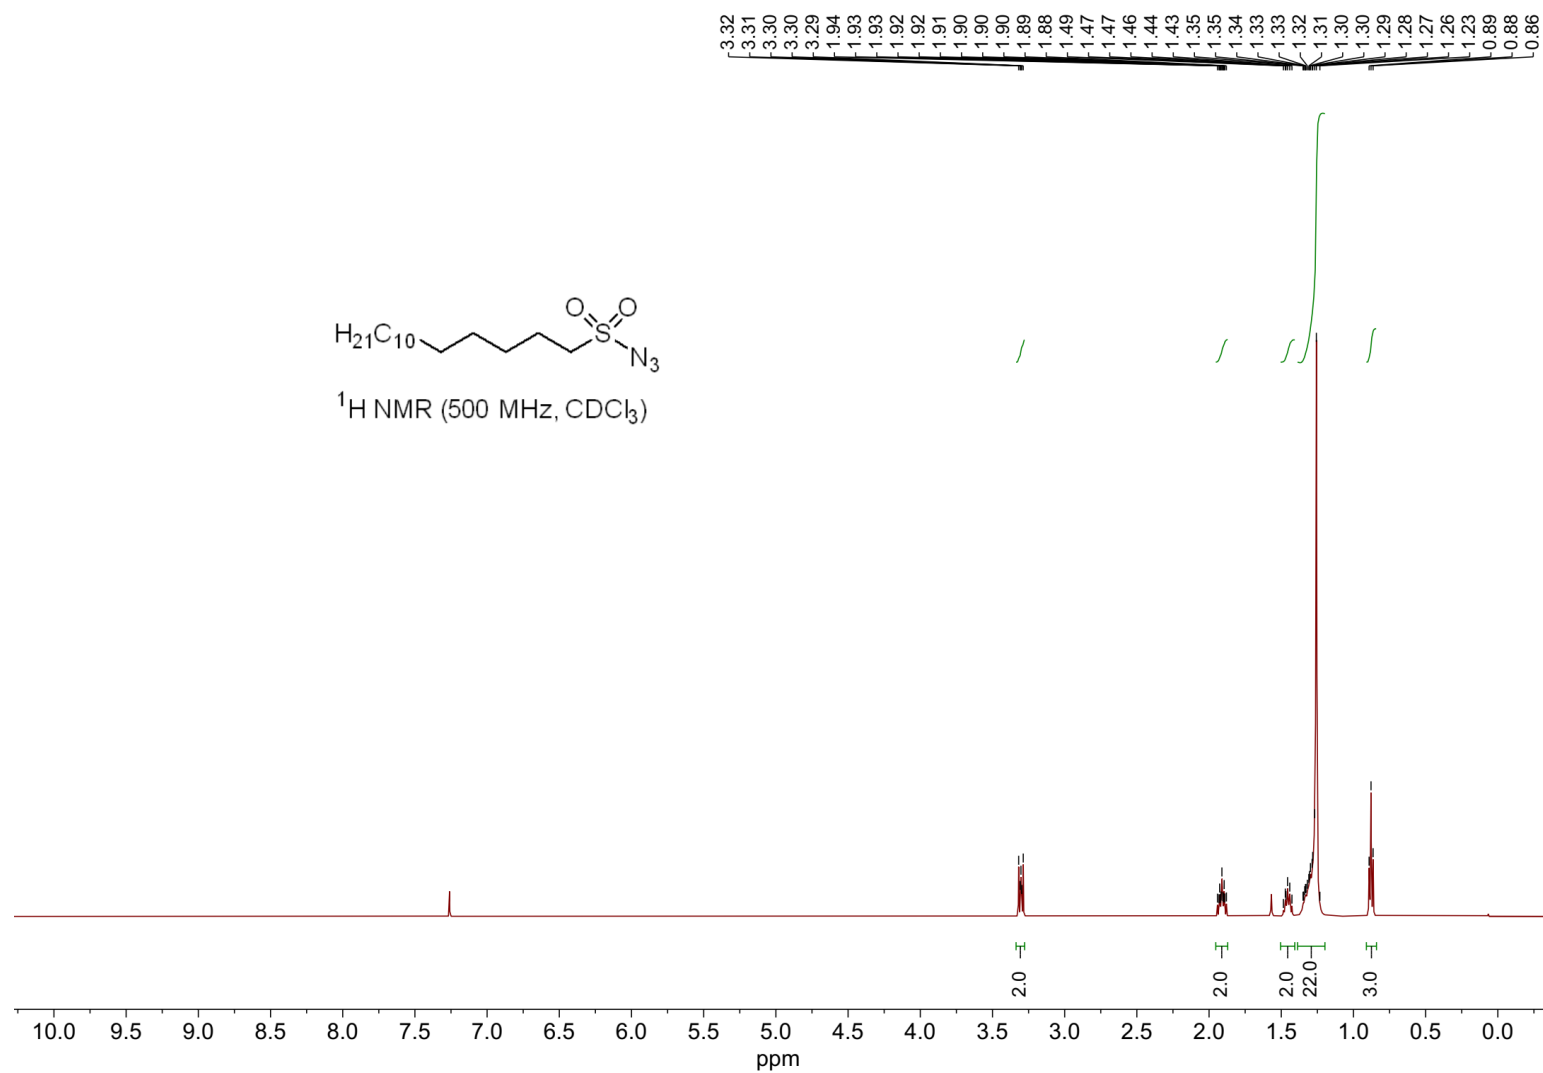

# Pentadecane-1-sulfonyl azide (9g)

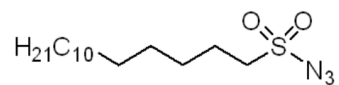

$^{13}\text{C}$  NMR (125 MHz,  $\text{CDCl}_3$ )

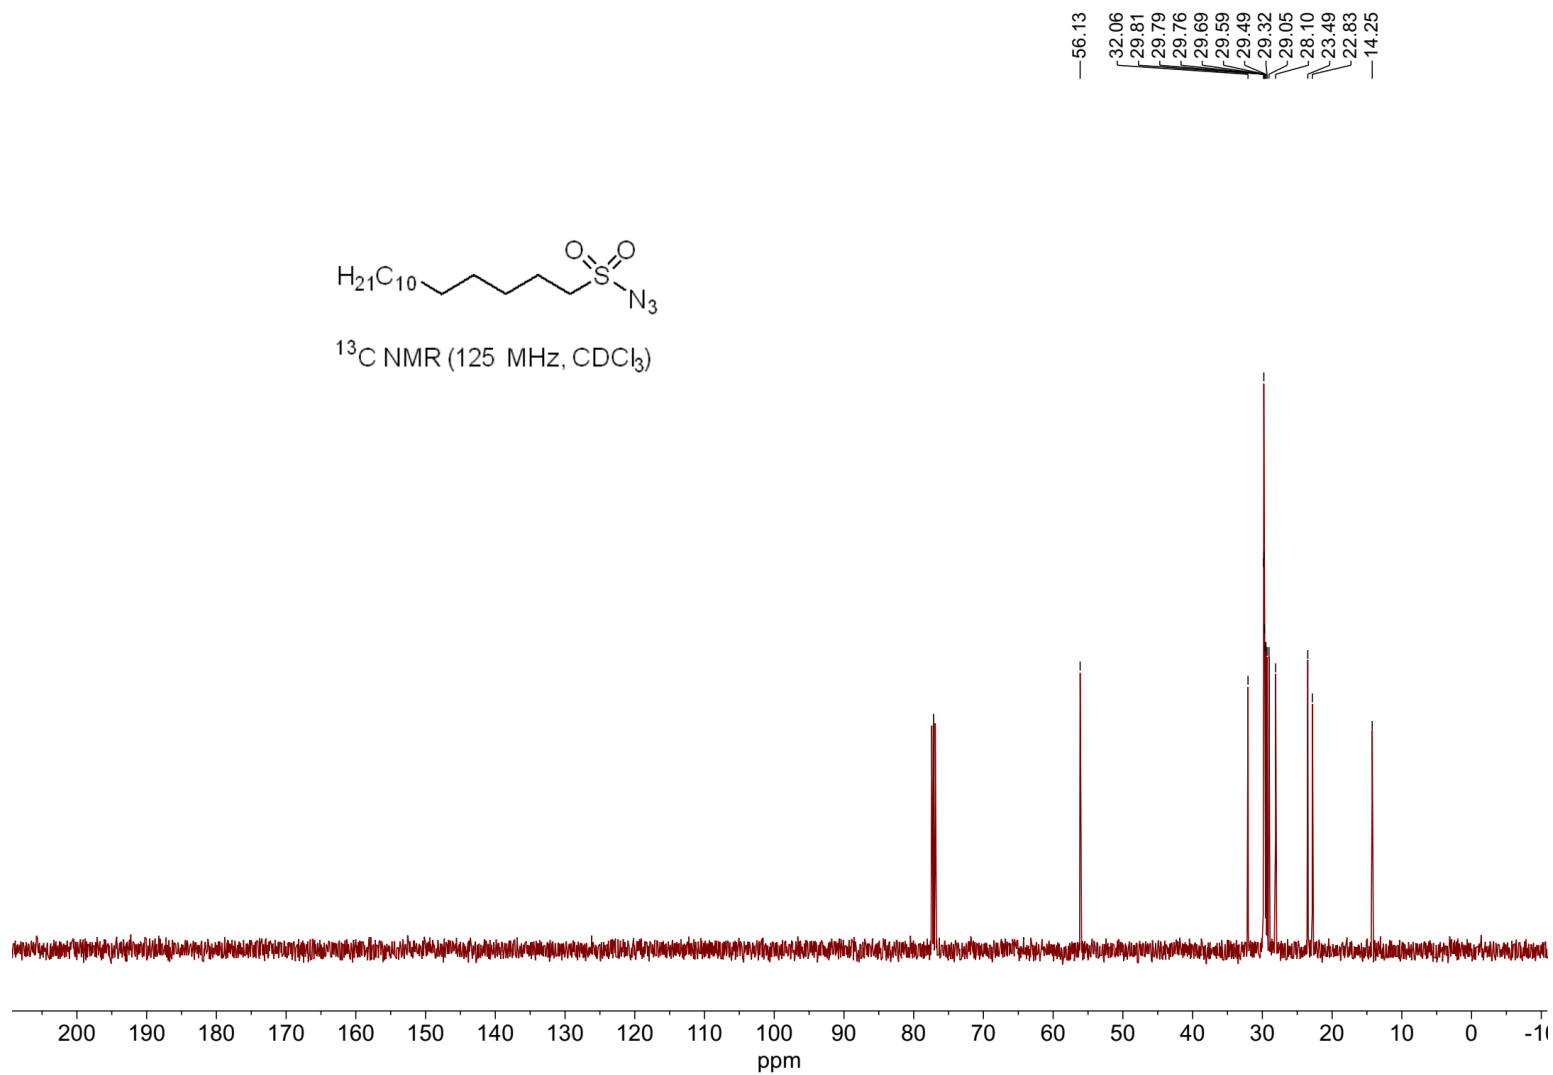

# *tert*-Butyl 4-(azidosulfonyl)piperidine-1-carboxylate (9h)

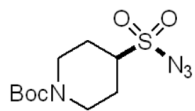

<sup>1</sup>H NMR (500 MHz, CDCl<sub>3</sub>)

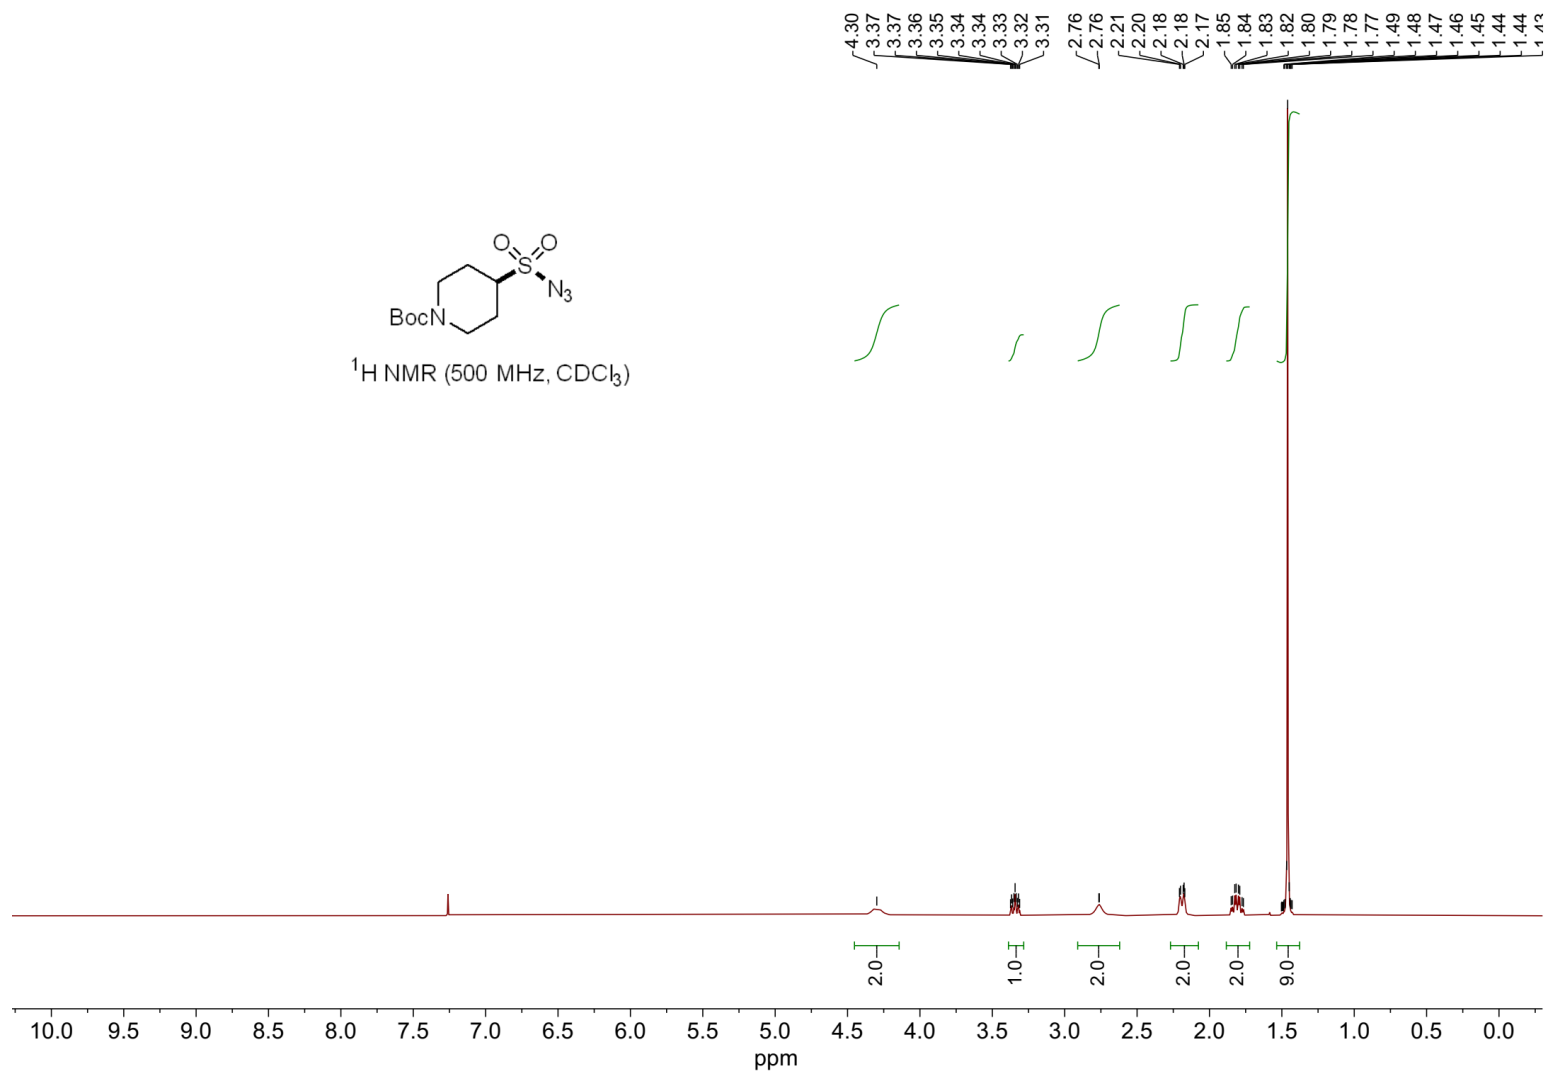

***tert*-Butyl 4-(azidosulfonyl)piperidine-1-carboxylate (9h)**

— 154.34 — 80.59 — 63.65 — 42.50 — 28.48 — 25.84

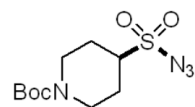

$^{13}\text{C}$  NMR (125 MHz,  $\text{CDCl}_3$ )

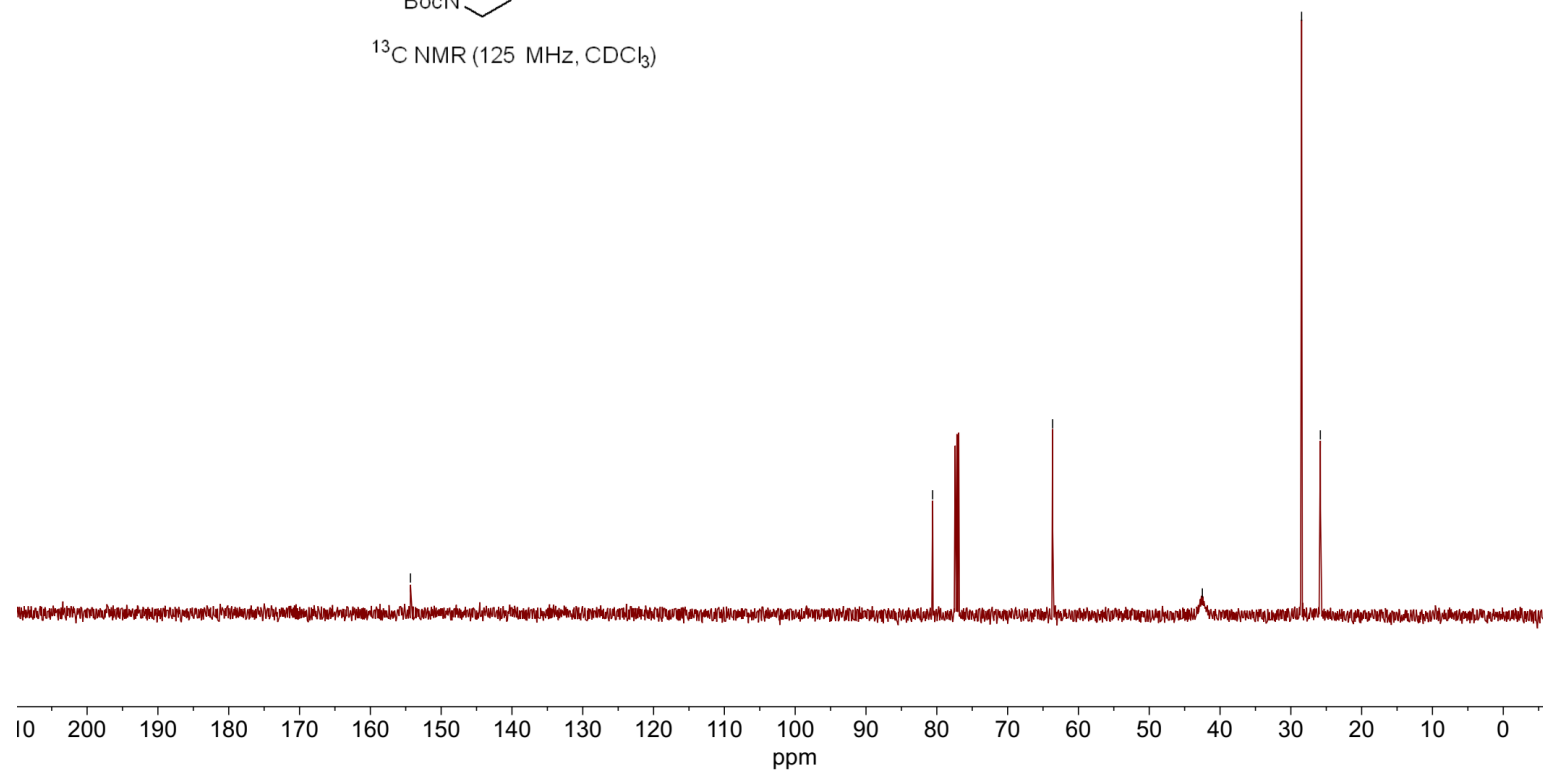



# Tetrahydro-2H-pyran-4-sulfonyl azide (9i)

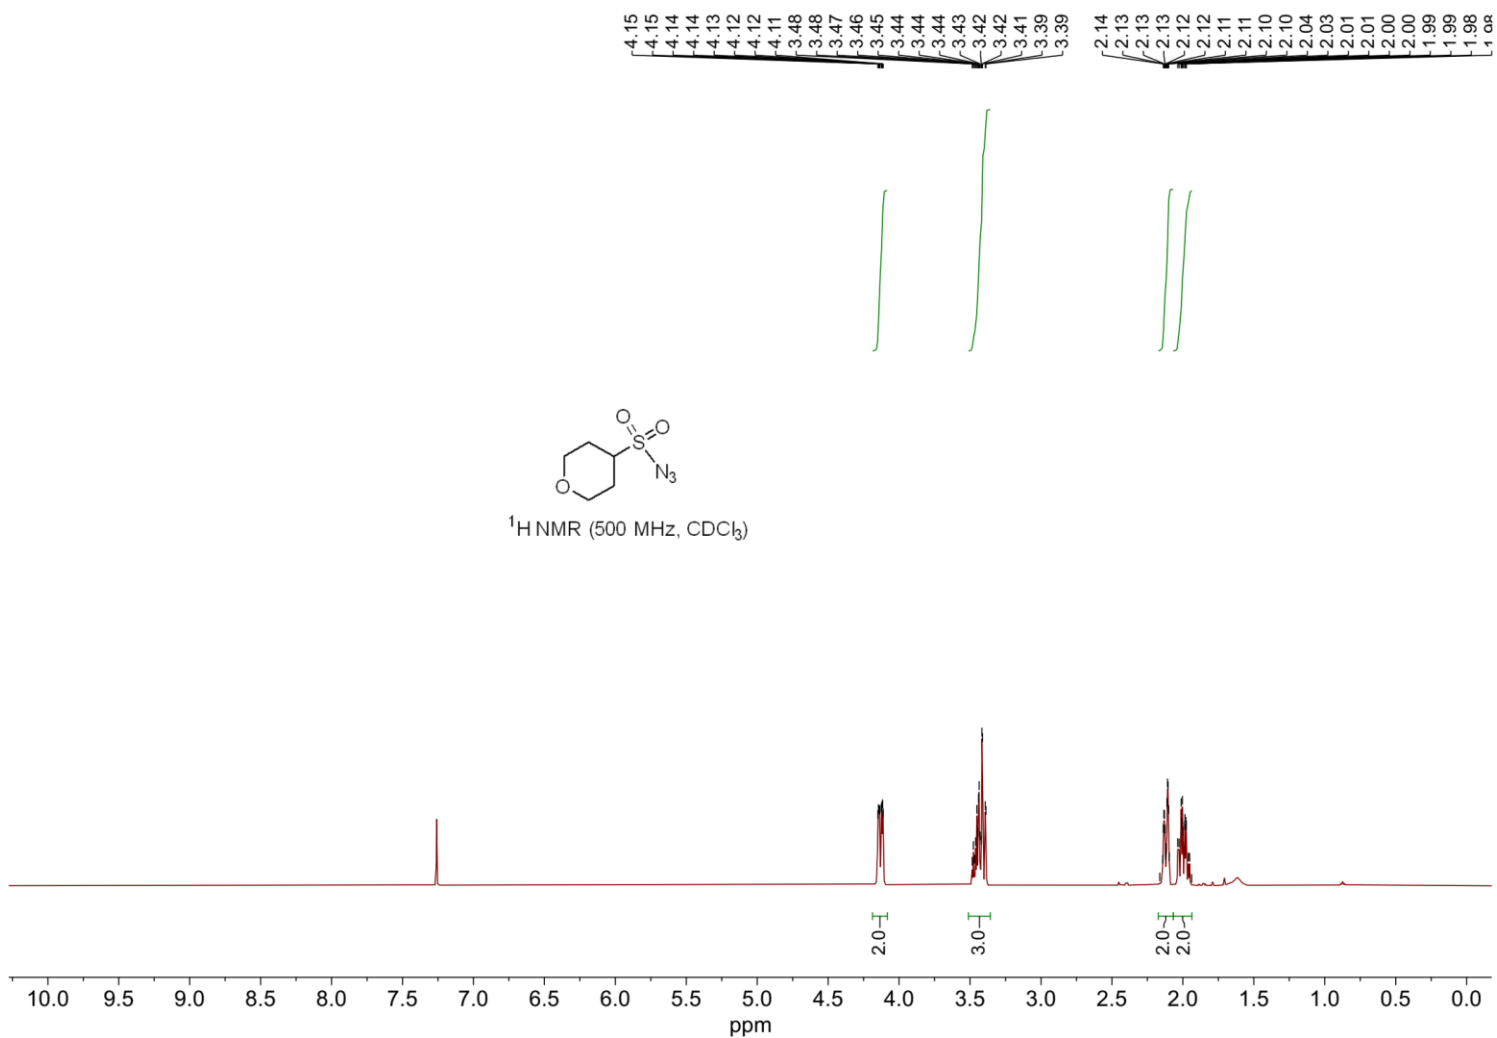

**Tetrahydro-2*H*-pyran-4-sulfonyl azide (9i)**

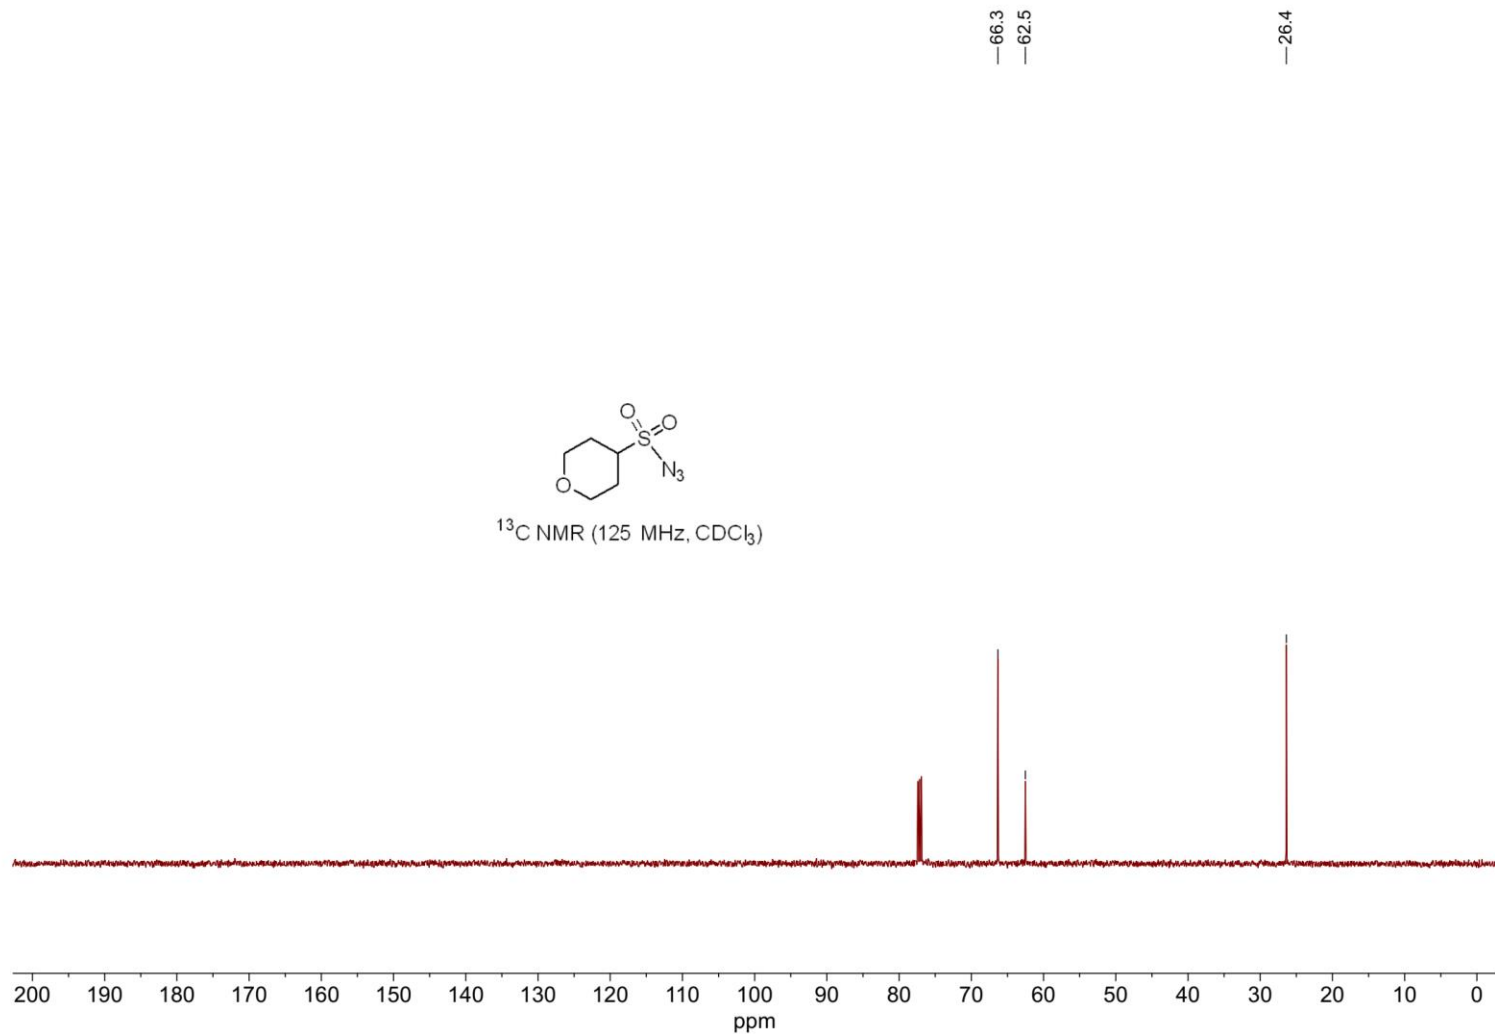

## 4-Methyltetrahydro-2*H*-pyran-4-sulfonyl azide (9j)

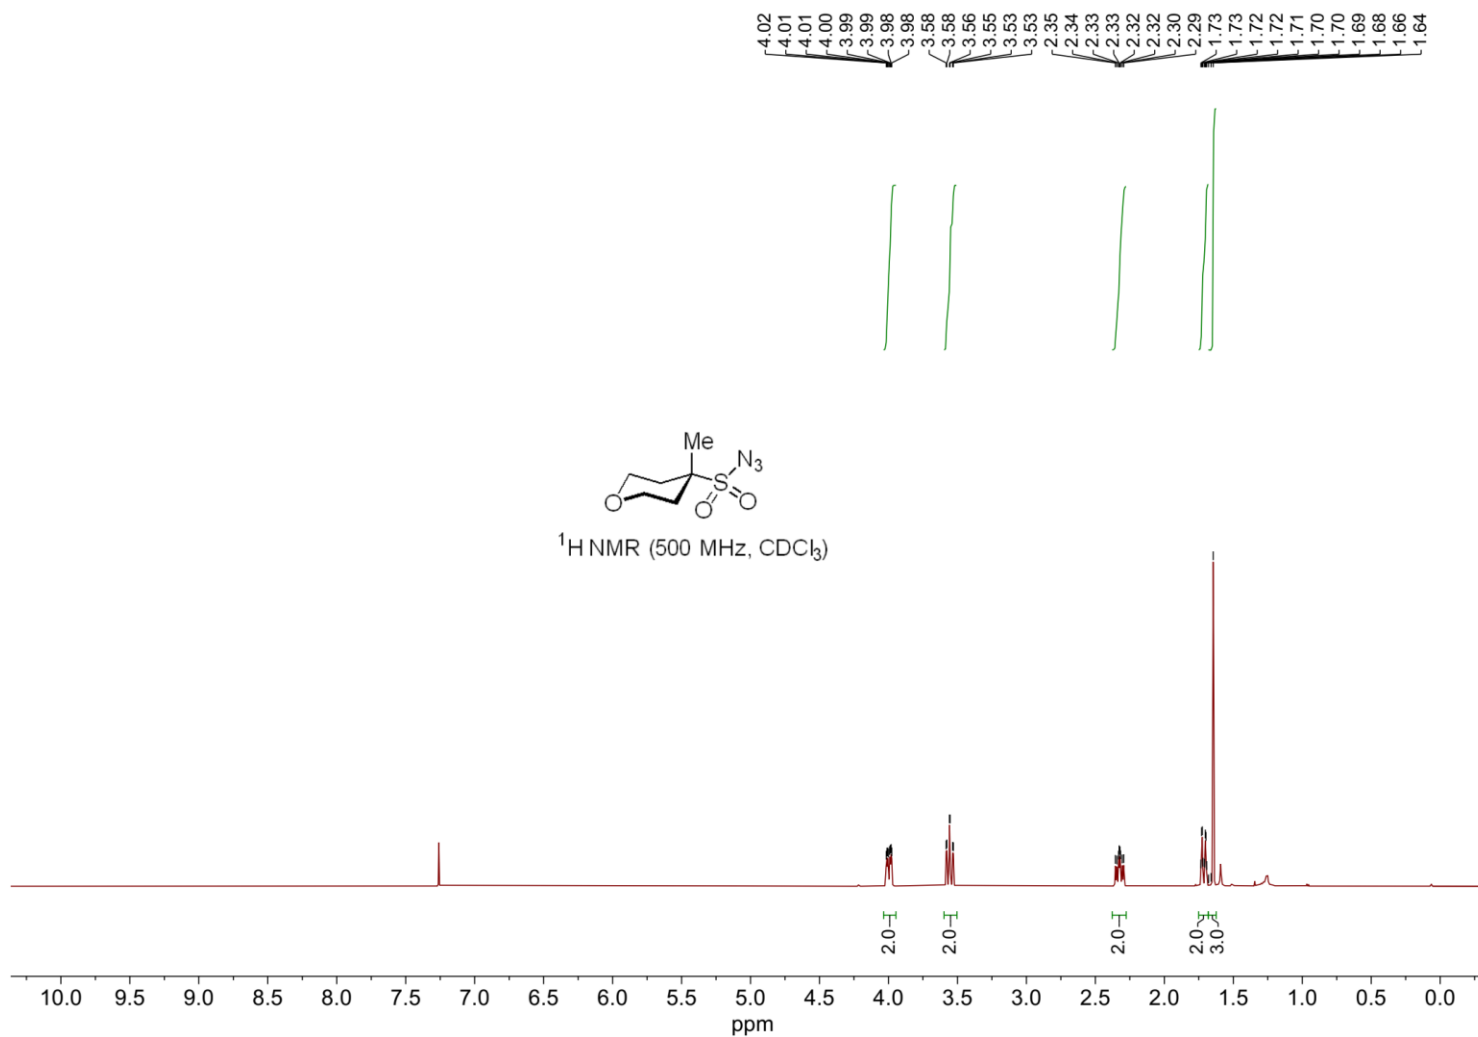

## 4-Methyltetrahydro-2*H*-pyran-4-sulfonyl azide (9j)

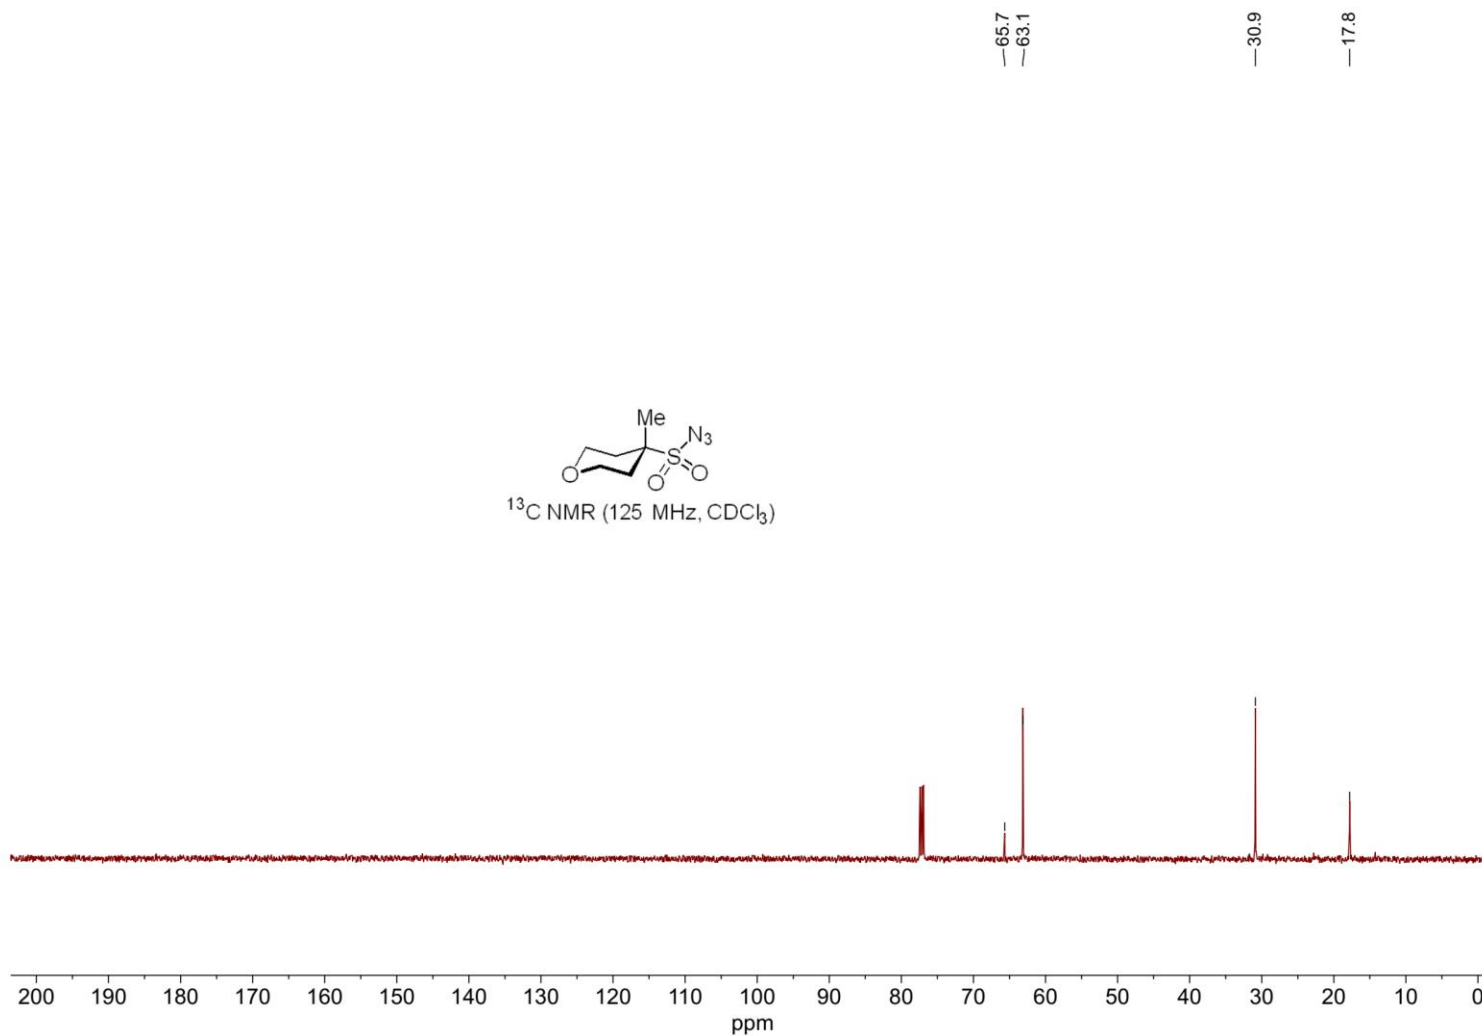

# Heptane-4-sulfonyl azide (9k)

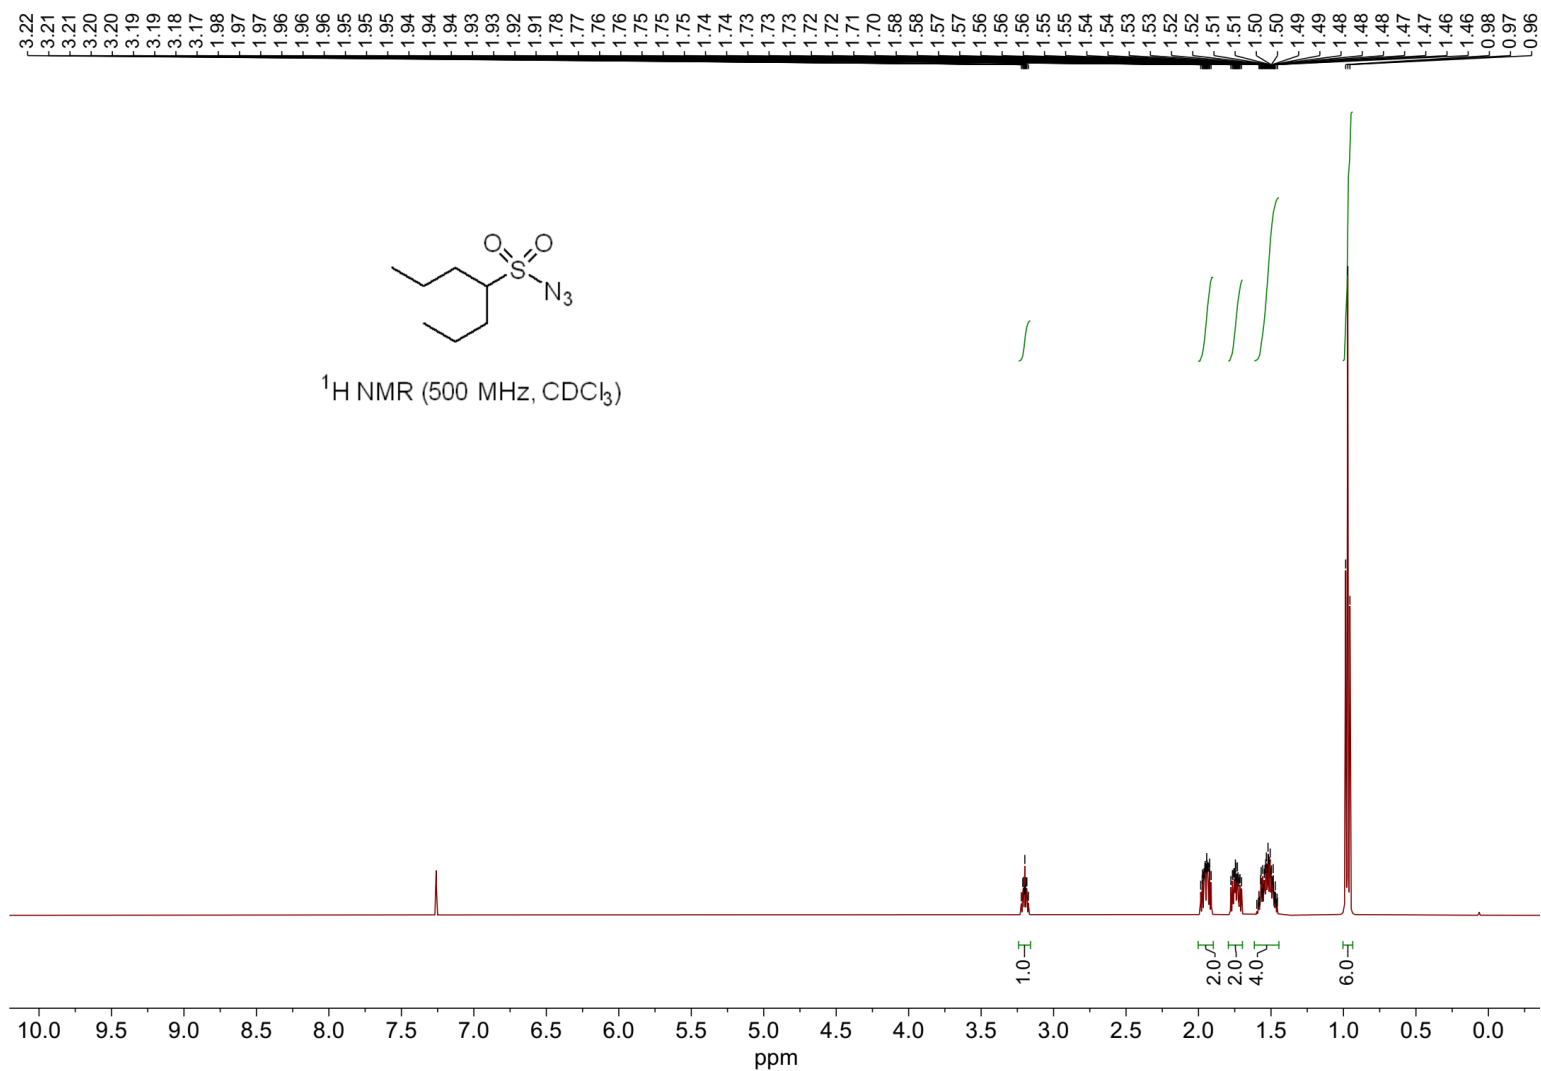

# Heptane-4-sulfonyl azide (9k)

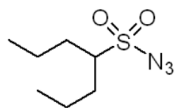

$^{13}\text{C}$  NMR (125 MHz,  $\text{CDCl}_3$ )

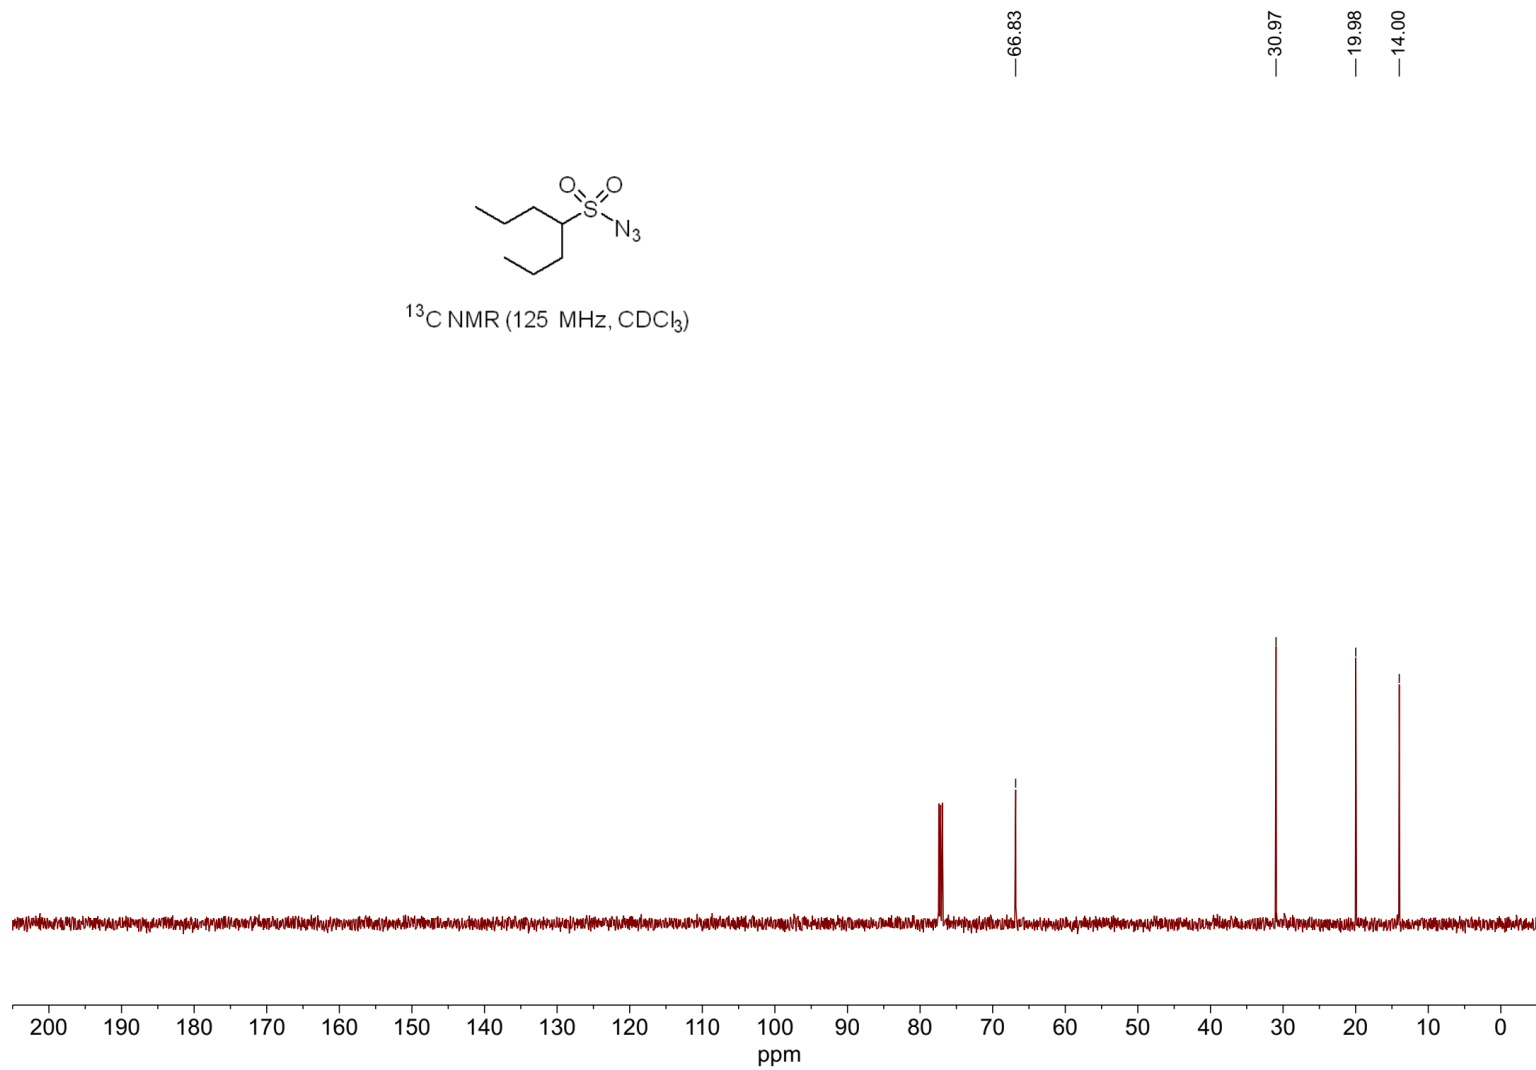

**3*R*,7*R*,8*R*,9*S*,10*S*,13*R*,14*S*,17*R*)-10,13-Dimethyl-17-((*R*)-4-(morpholinosulfonyl)butan-2-yl)hexadecahydro-1*H*-cyclopenta[*a*]phenanthrene-3,7-diyl diacetate (10a)**

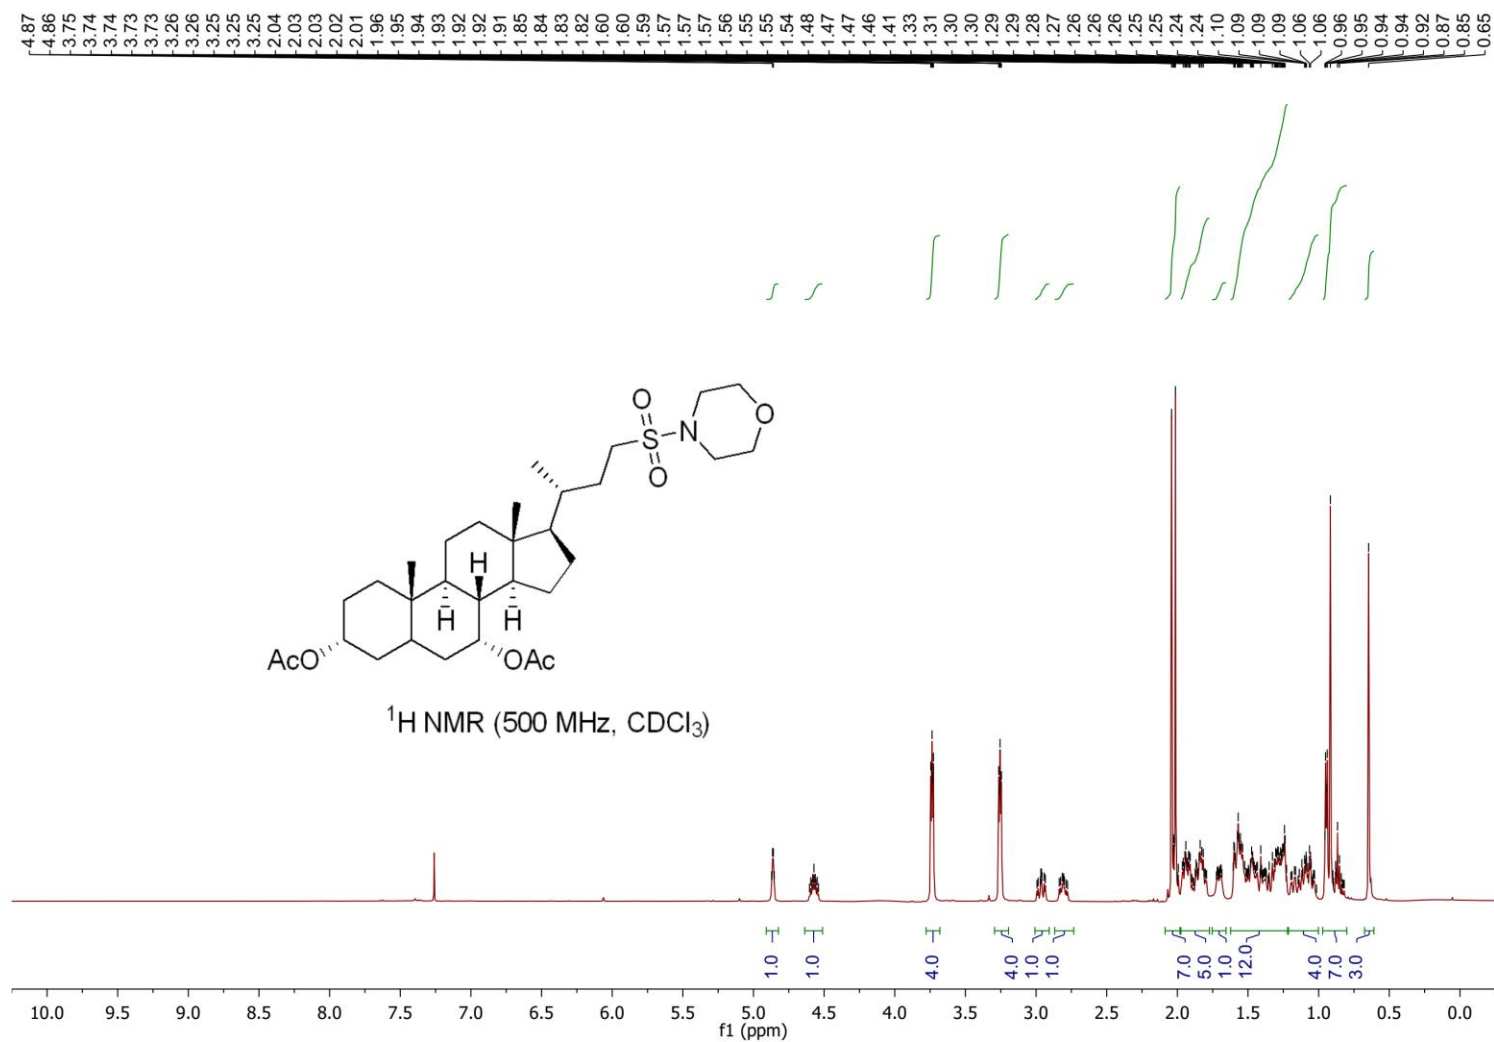

**(3*R*,7*R*,8*R*,9*S*,10*S*,13*R*,14*S*,17*R*)-10,13-Dimethyl-17-((*R*)-4-(morpholinosulfonyl)butan-2-yl)hexadecahydro-1*H*-cyclopenta[*a*]phenanthrene-3,7-diyl diacetate (10a)**

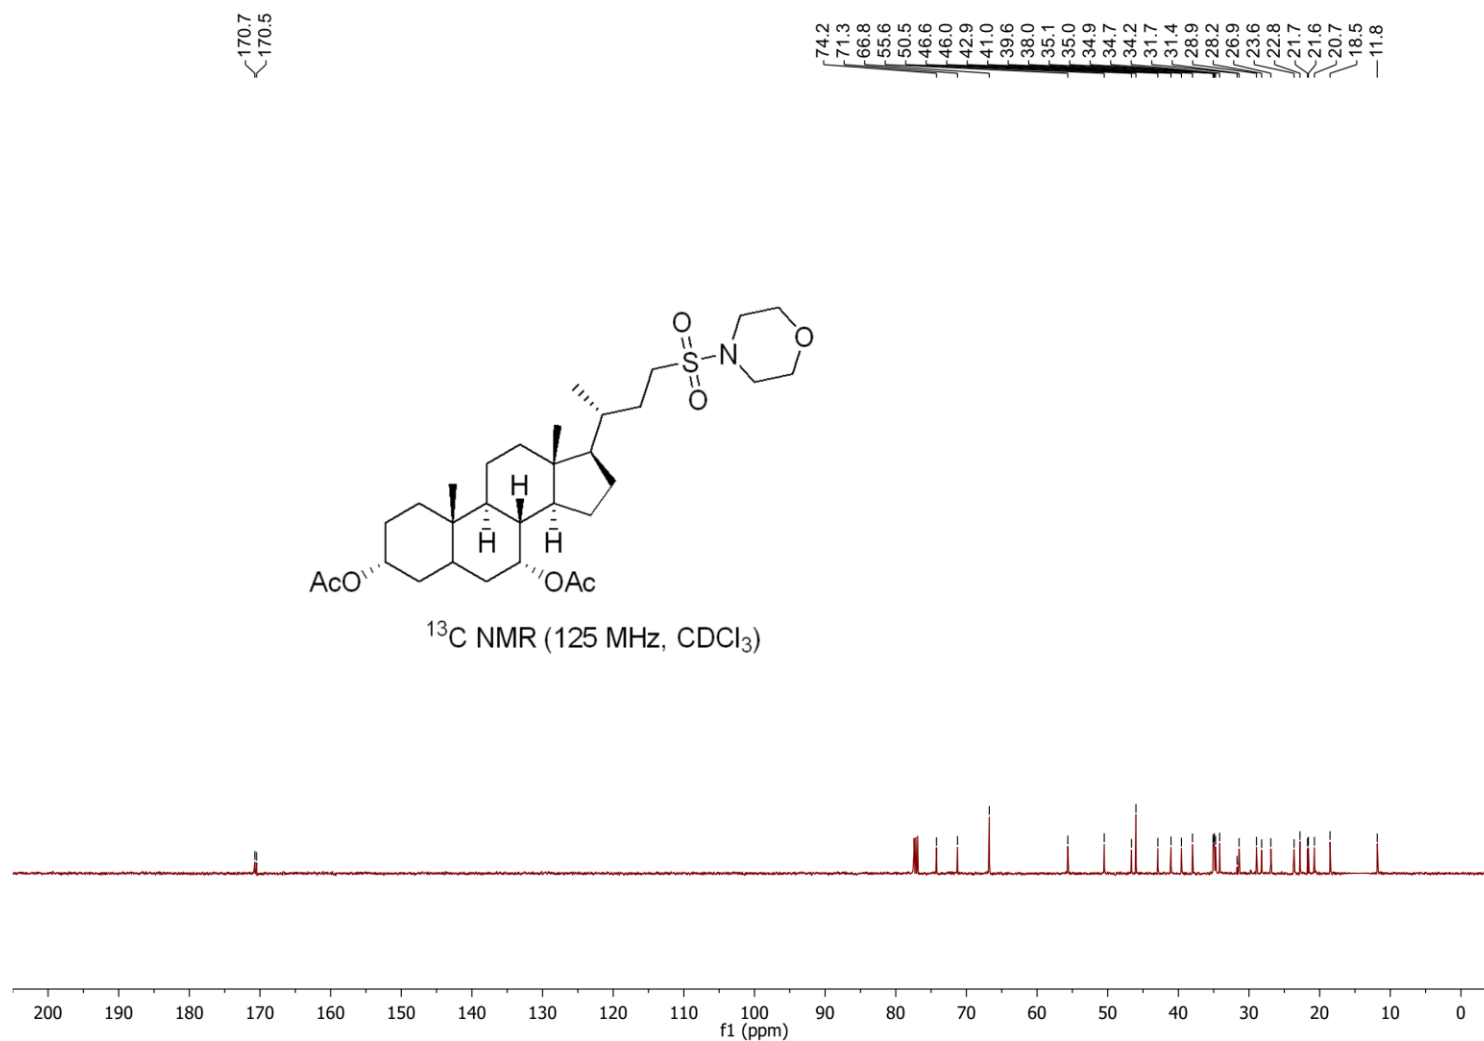



15-(Morpholinosulfonyl)pentadecane-1,7,8-triyl triacetate (10b)

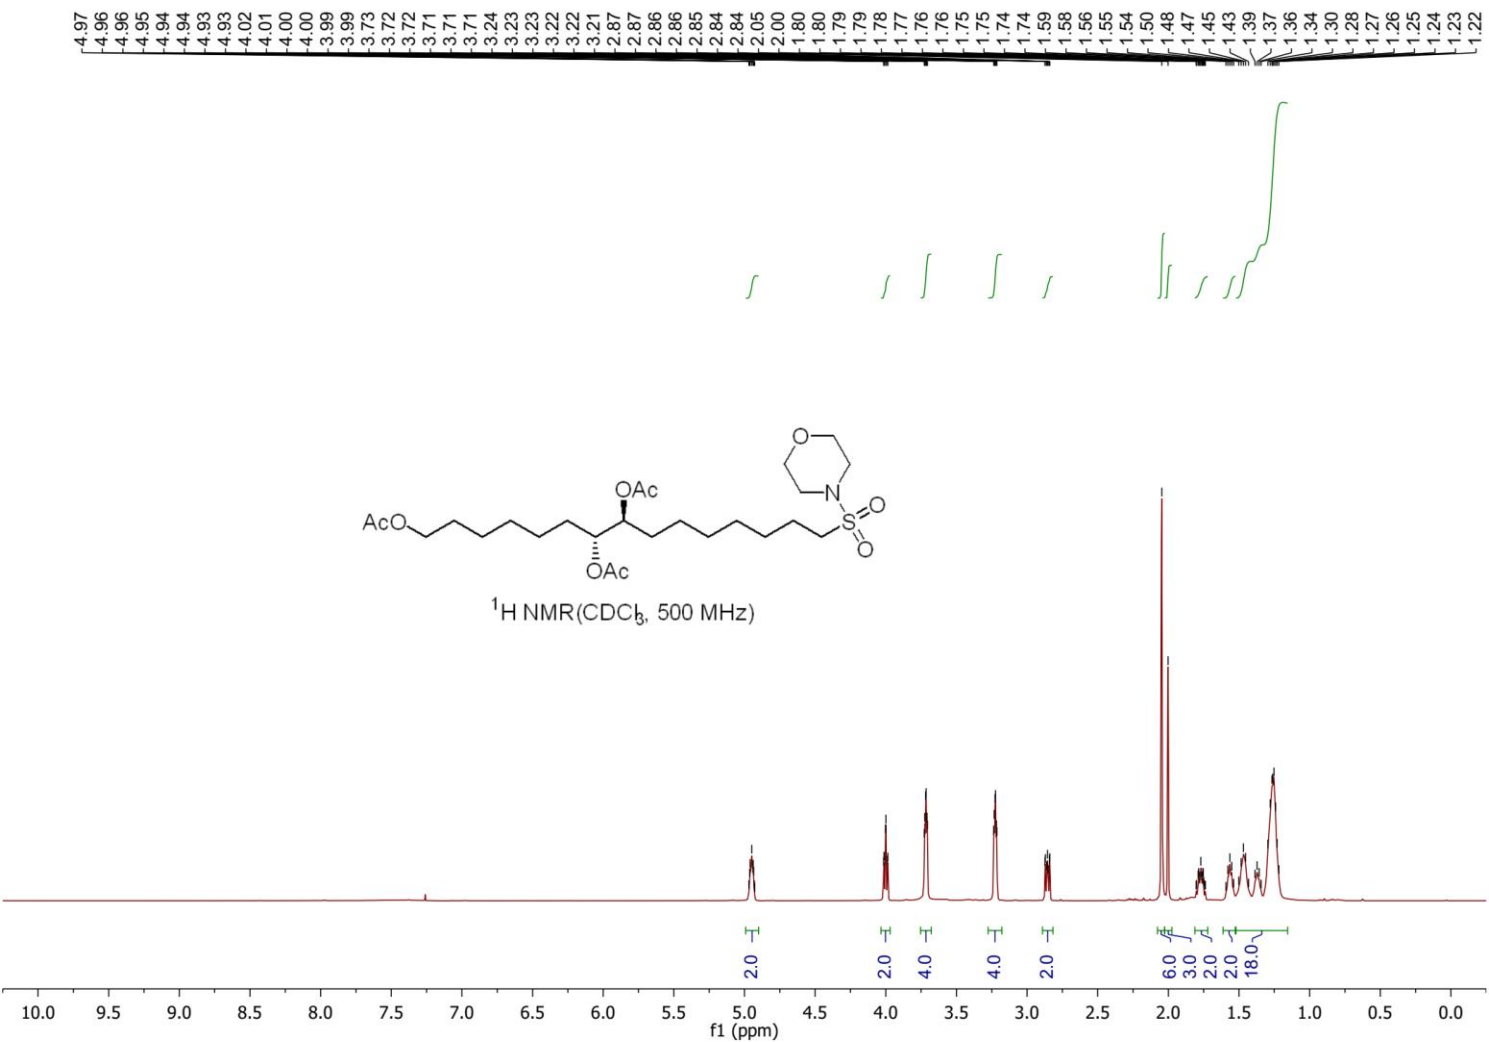

15-(Morpholinosulfonyl)pentadecane-1,7,8-triyl triacetate (10b)

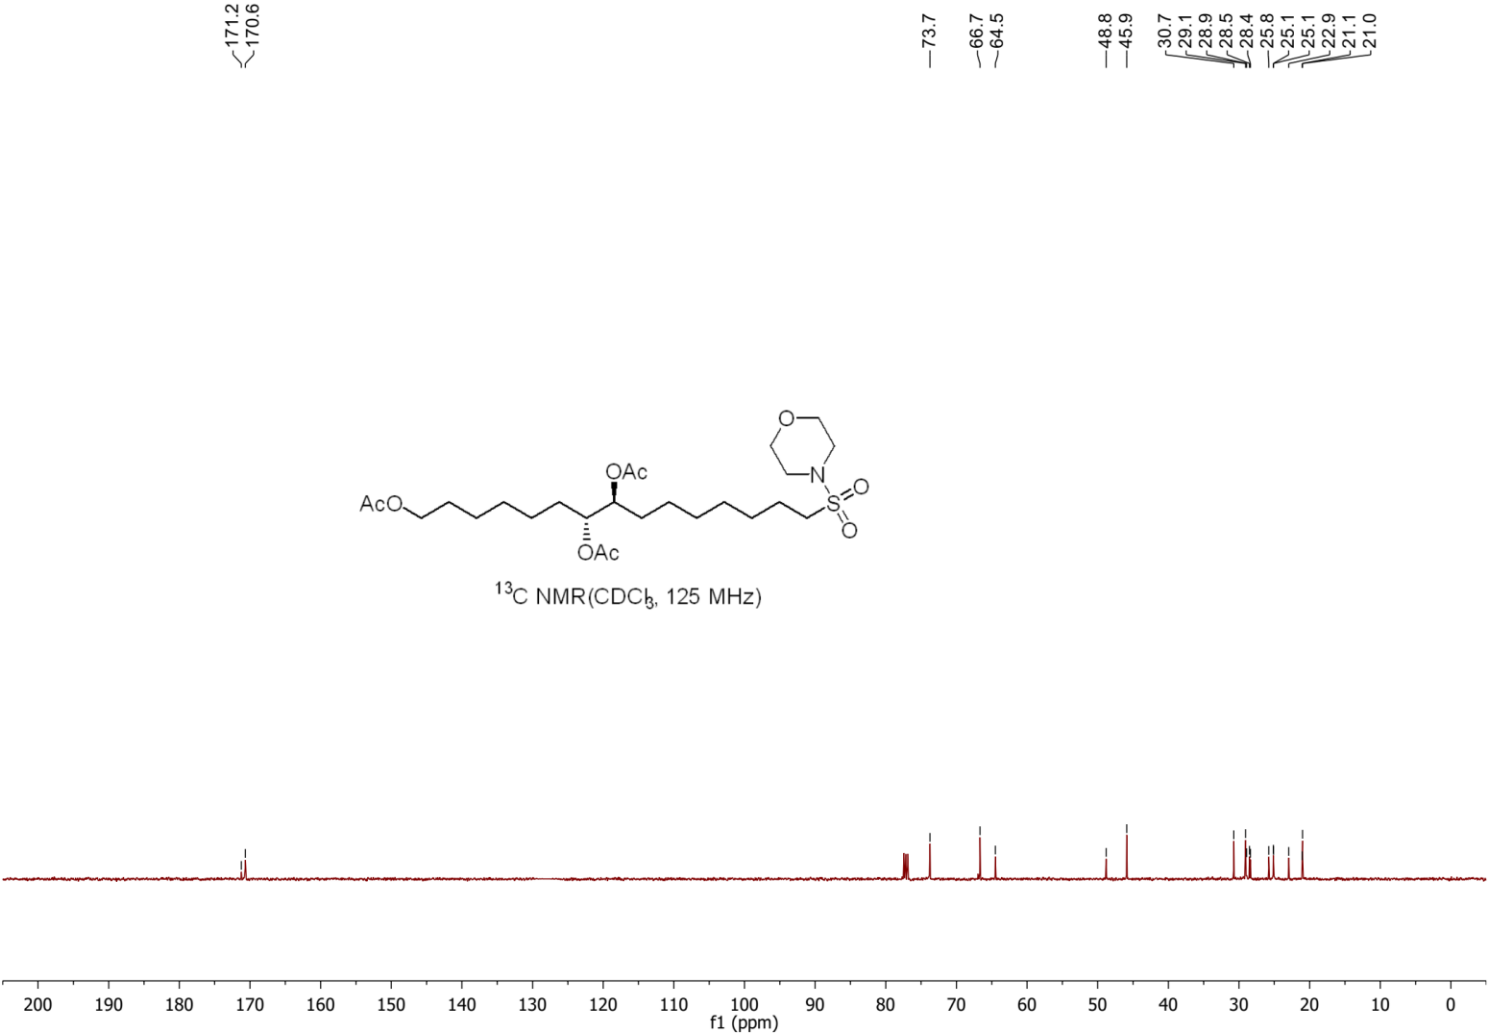

**(1*S*,2*S*,4*aR*,4*bR*,7*S*,9*aS*,10*S*,10*aR*)-1-Methyl-8-methylene-10-(morpholinosulfonyl)-13-oxo-1,2,5,6,8,9,10,10*a*-octahydro-4*a*,1-(epoxymethano)-7,9*a*-methanobenzo[*a*]azulene-2,7(4*bH*)-diyl diacetate (10c)**

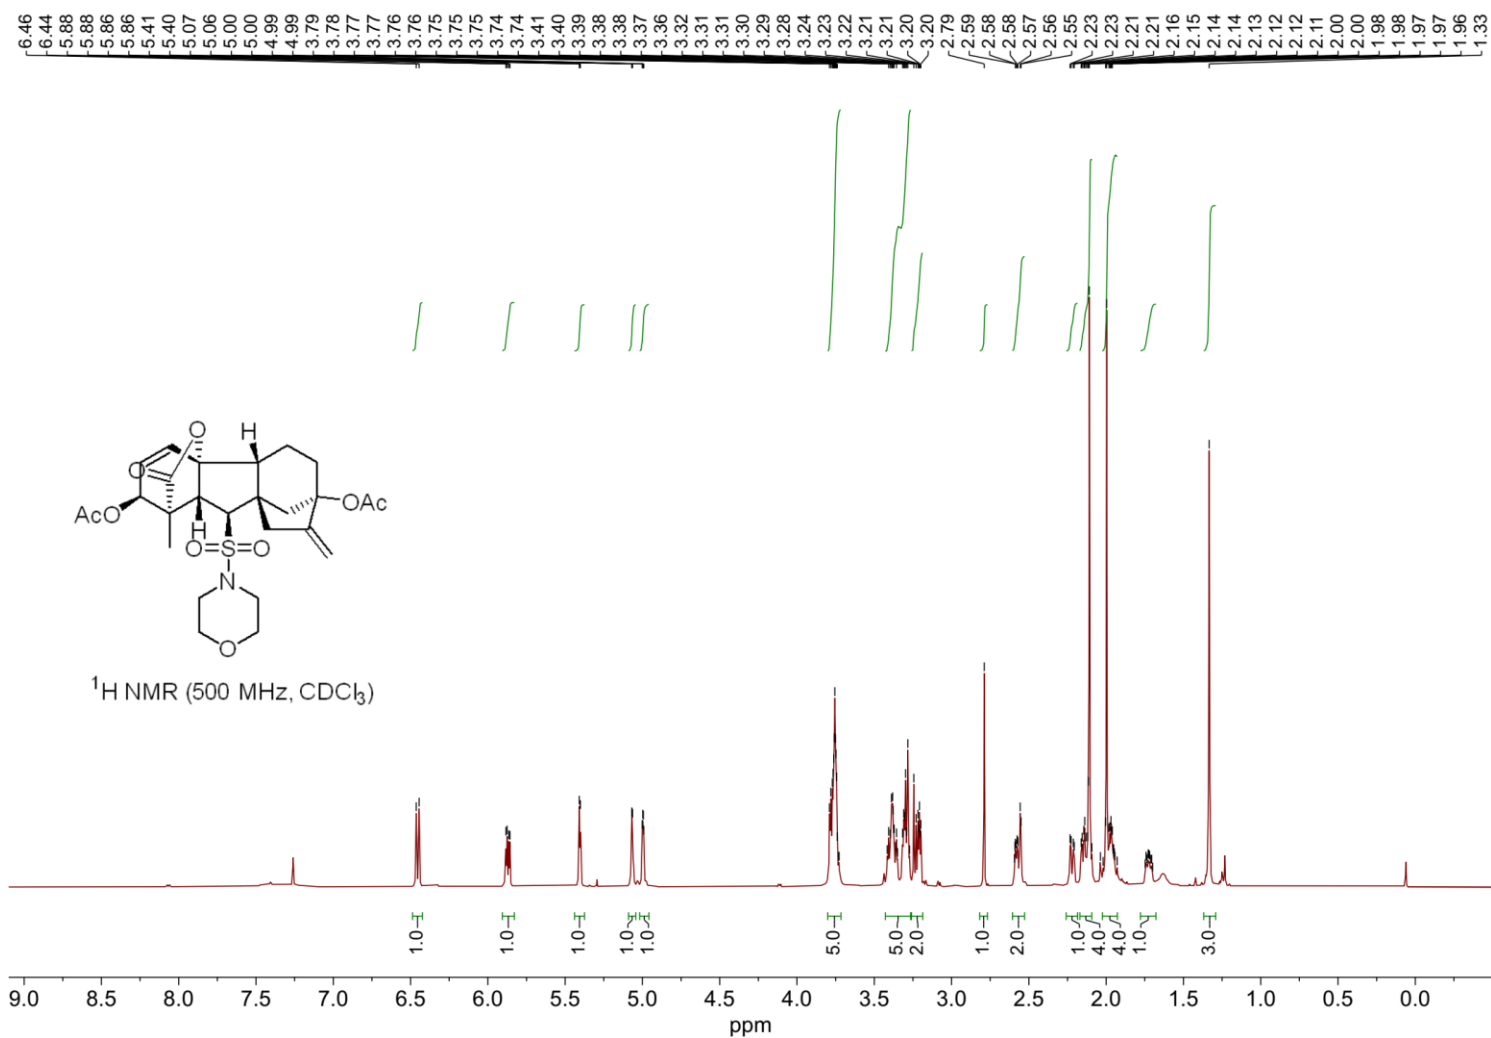

**(1*S*,2*S*,4*aR*,4*bR*,7*S*,9*aS*,10*S*,10*aR*)-1-Methyl-8-methylene-10-(morpholinosulfonyl)-13-oxo-1,2,5,6,8,9,10,10*a*-octahydro-4*a*,1-(epoxymethano)-7,9*a*-methanobenzo[*a*]azulene-2,7(4*bH*)-diyl diacetate (10c)**

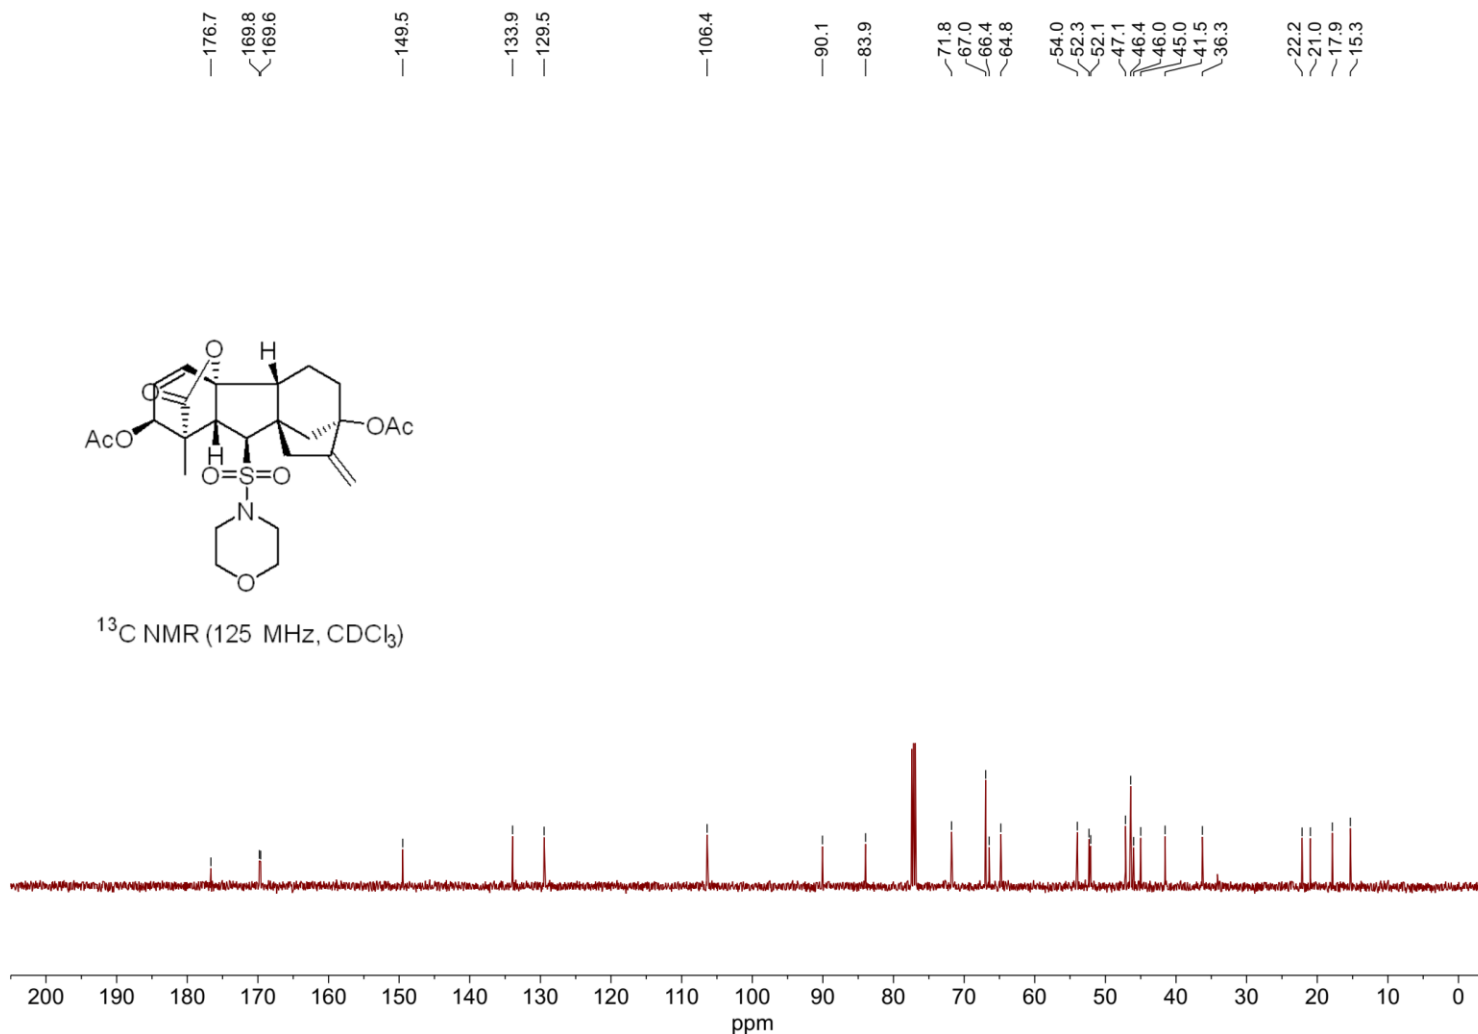

# ***N*-(4-(3-ethyl-2,6-dioxopiperidin-3-yl)phenyl)-4-oxo-4-phenylbutane-1-sulfonamide (10d)**

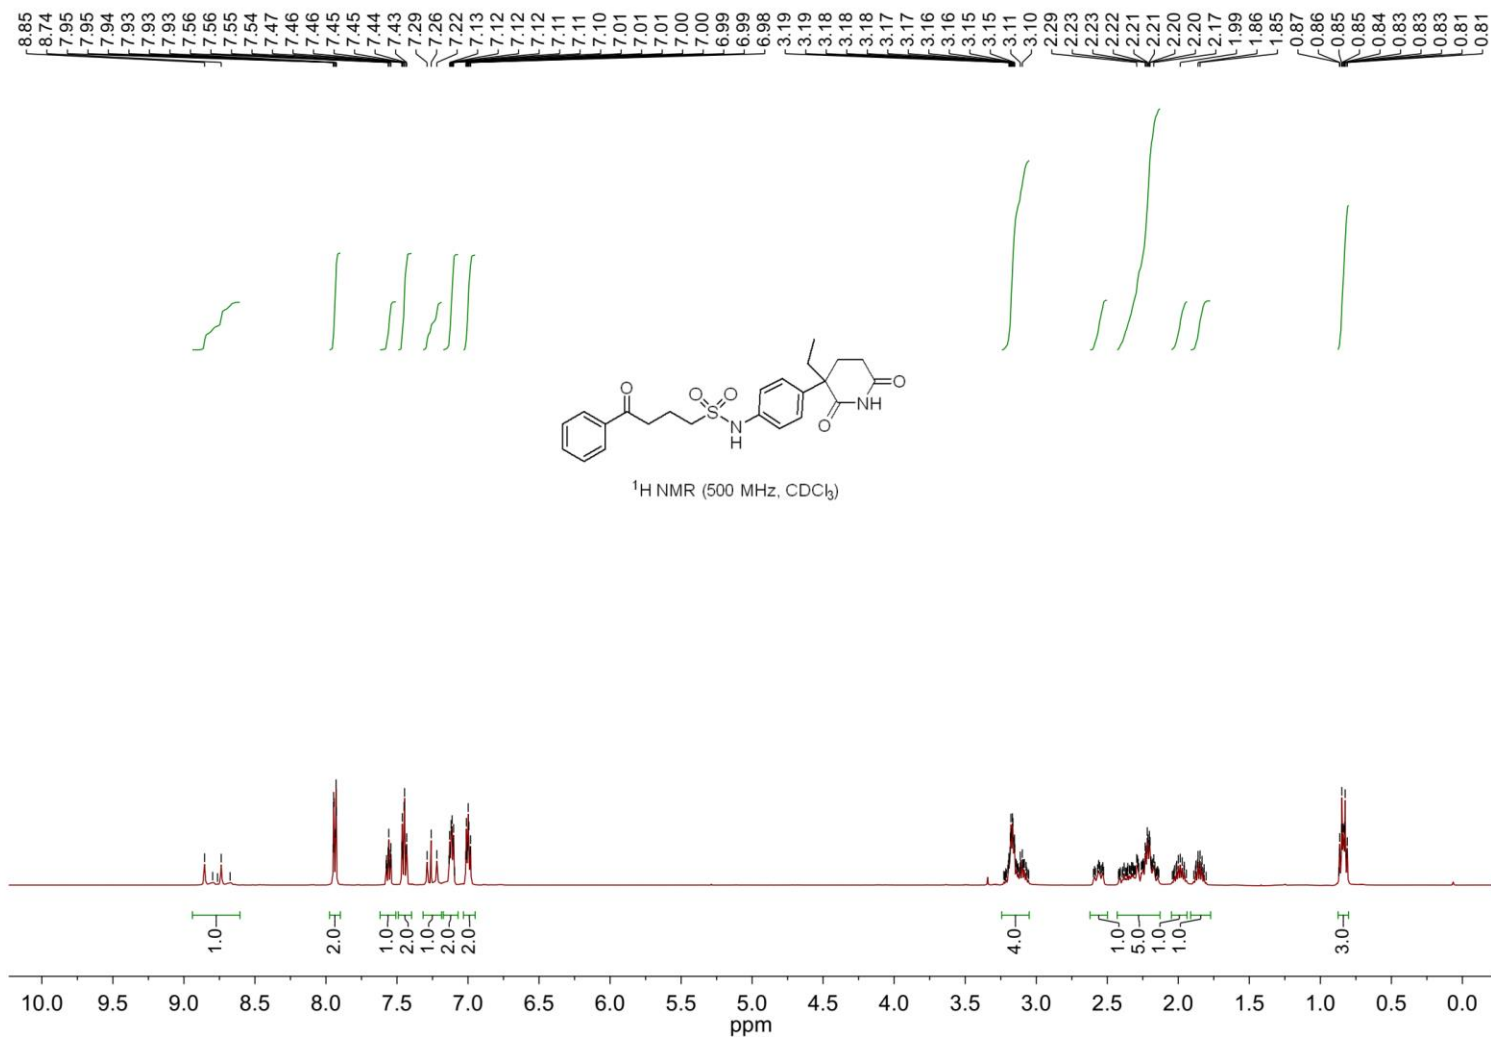

# ***N*-(4-(3-ethyl-2,6-dioxopiperidin-3-yl)phenyl)-4-oxo-4-phenylbutane-1-sulfonamide (10d)**

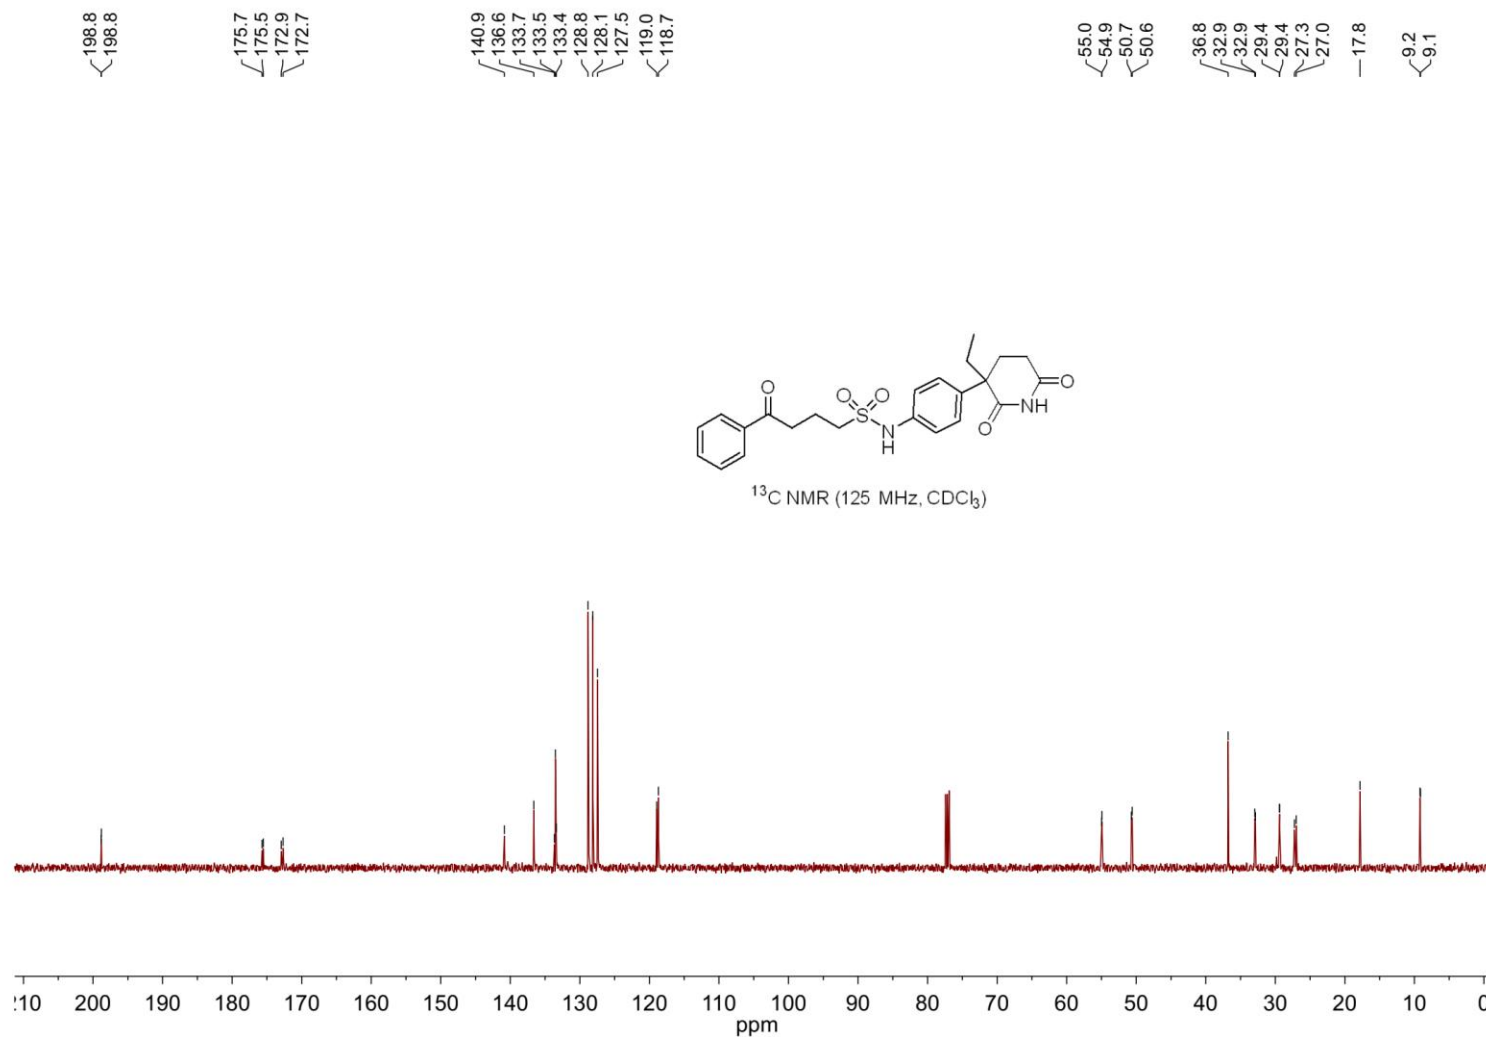

# **Benzyl (S)-4-(azidosulfonyl)-2-(((benzyloxy)carbonyl)amino)butanoate (10e)**

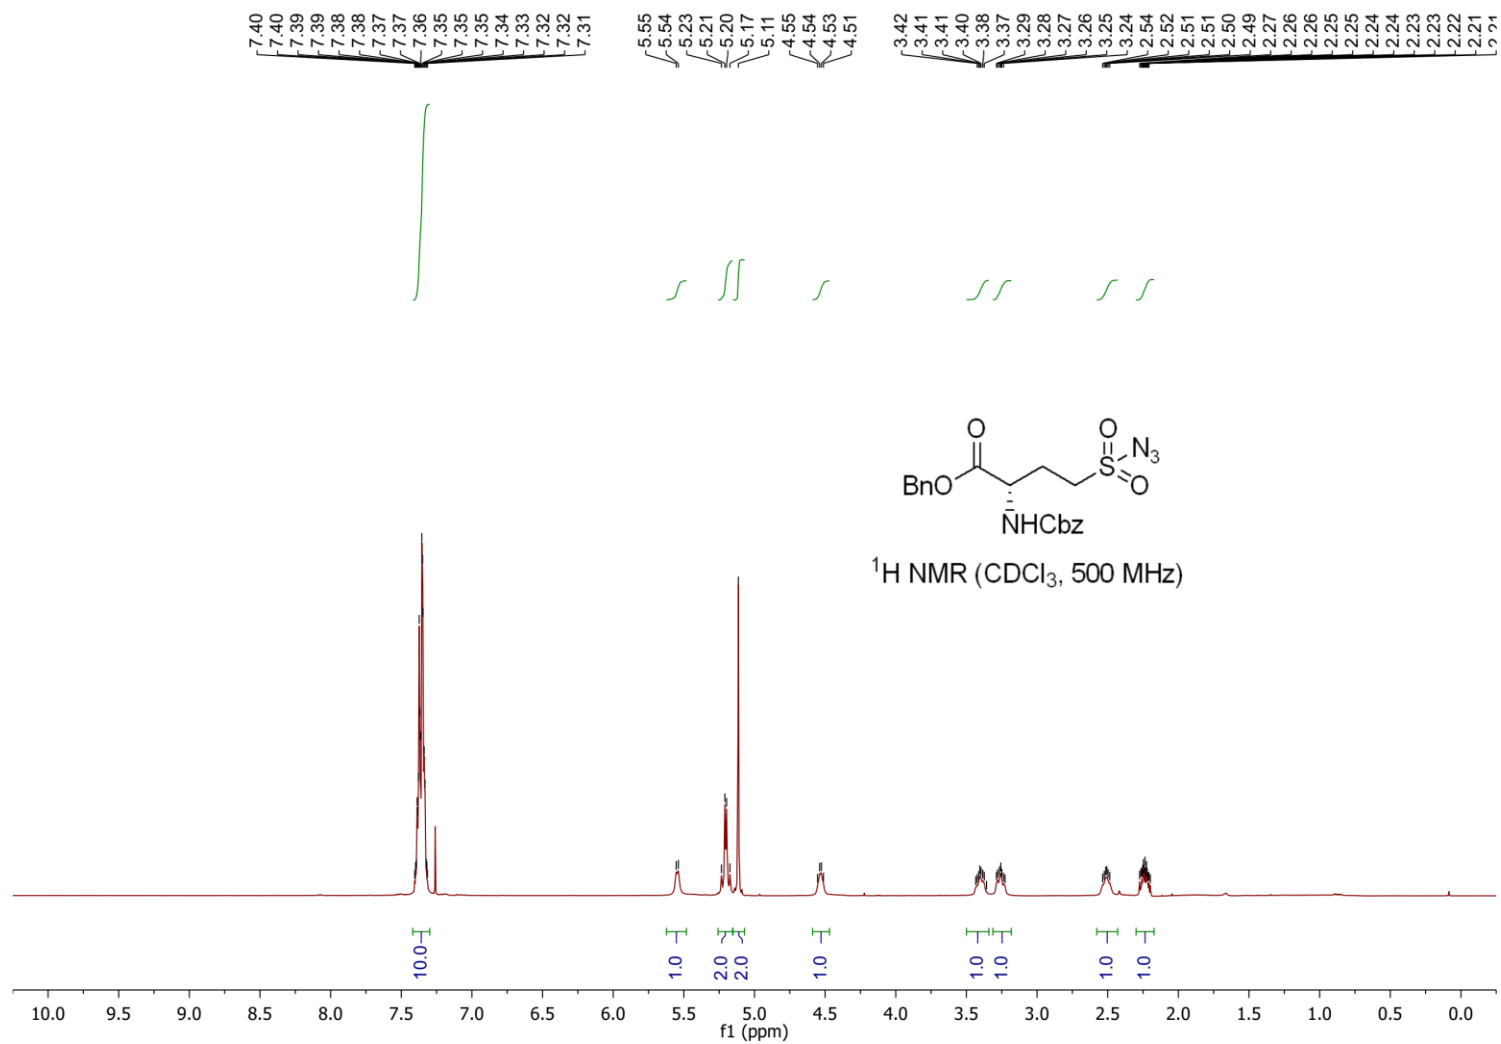

# **Benzyl (S)-4-(azidosulfonyl)-2-(((benzyloxy)carbonyl)amino)butanoate (10e)**

<sup>13</sup>C NMR (CDCl<sub>3</sub>, 125 MHz) peaks (ppm):  
 170.4, 156.1, 135.9, 134.7, 129.0, 128.9, 128.7, 128.6, 128.3, 68.2, 67.6, 52.3, 52.1, 27.0

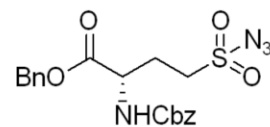

<sup>13</sup>C NMR (CDCl<sub>3</sub>, 125 MHz)

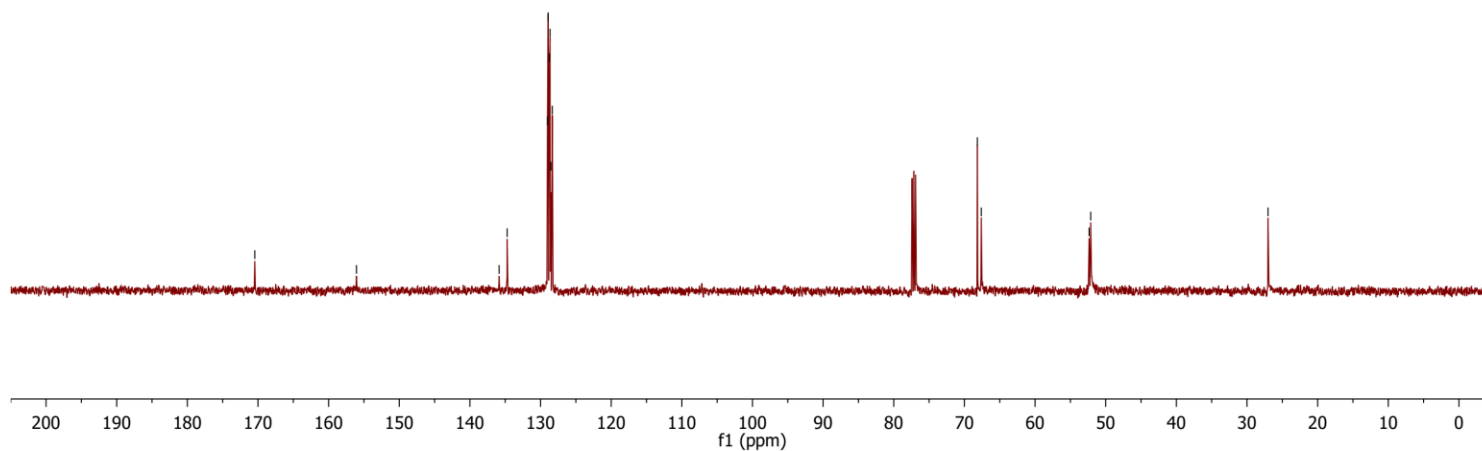



**((3a*S*,5a*R*,8a*R*,8b*S*)-2,2,7,7-Tetramethyltetrahydro-3a*H*-bis([1,3]dioxolo)[4,5-*b*:4',5'-*d*]pyran-3a-yl)methyl 4-(azidosulfonyl)butanoate (10f)**

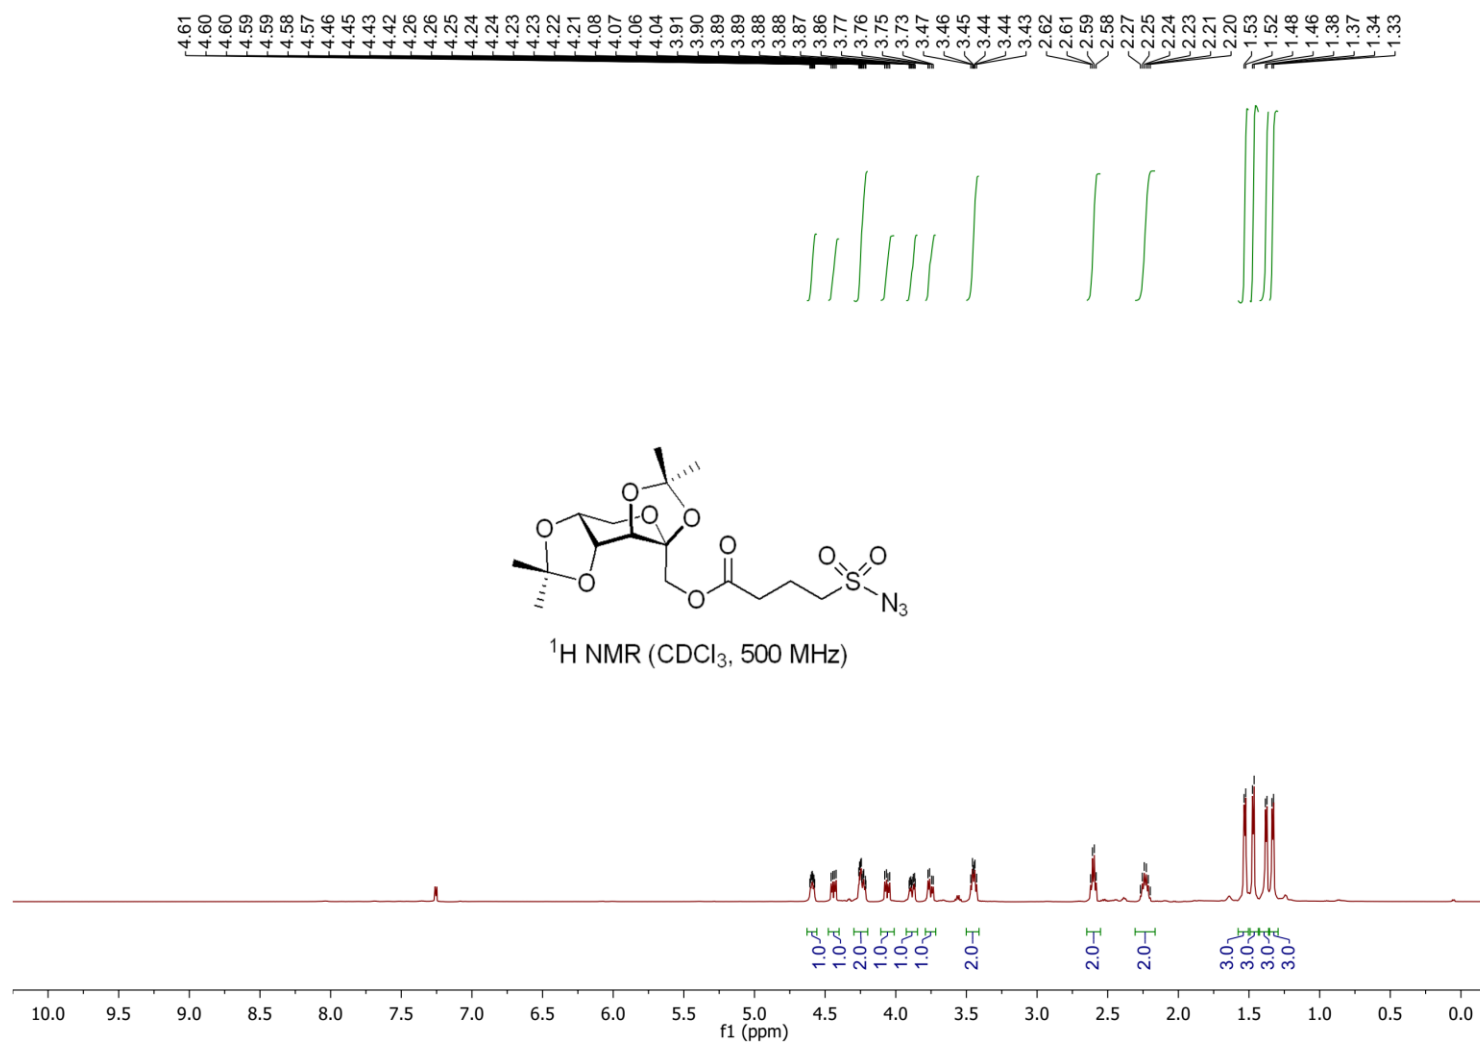

**((3a*S*,5a*R*,8a*R*,8b*S*)-2,2,7,7-Tetramethyltetrahydro-3a*H*-bis([1,3]dioxolo)[4,5-*b*:4',5'-*d*]pyran-3a-yl)methyl 4-(azidosulfonyl)butanoate (10f)**

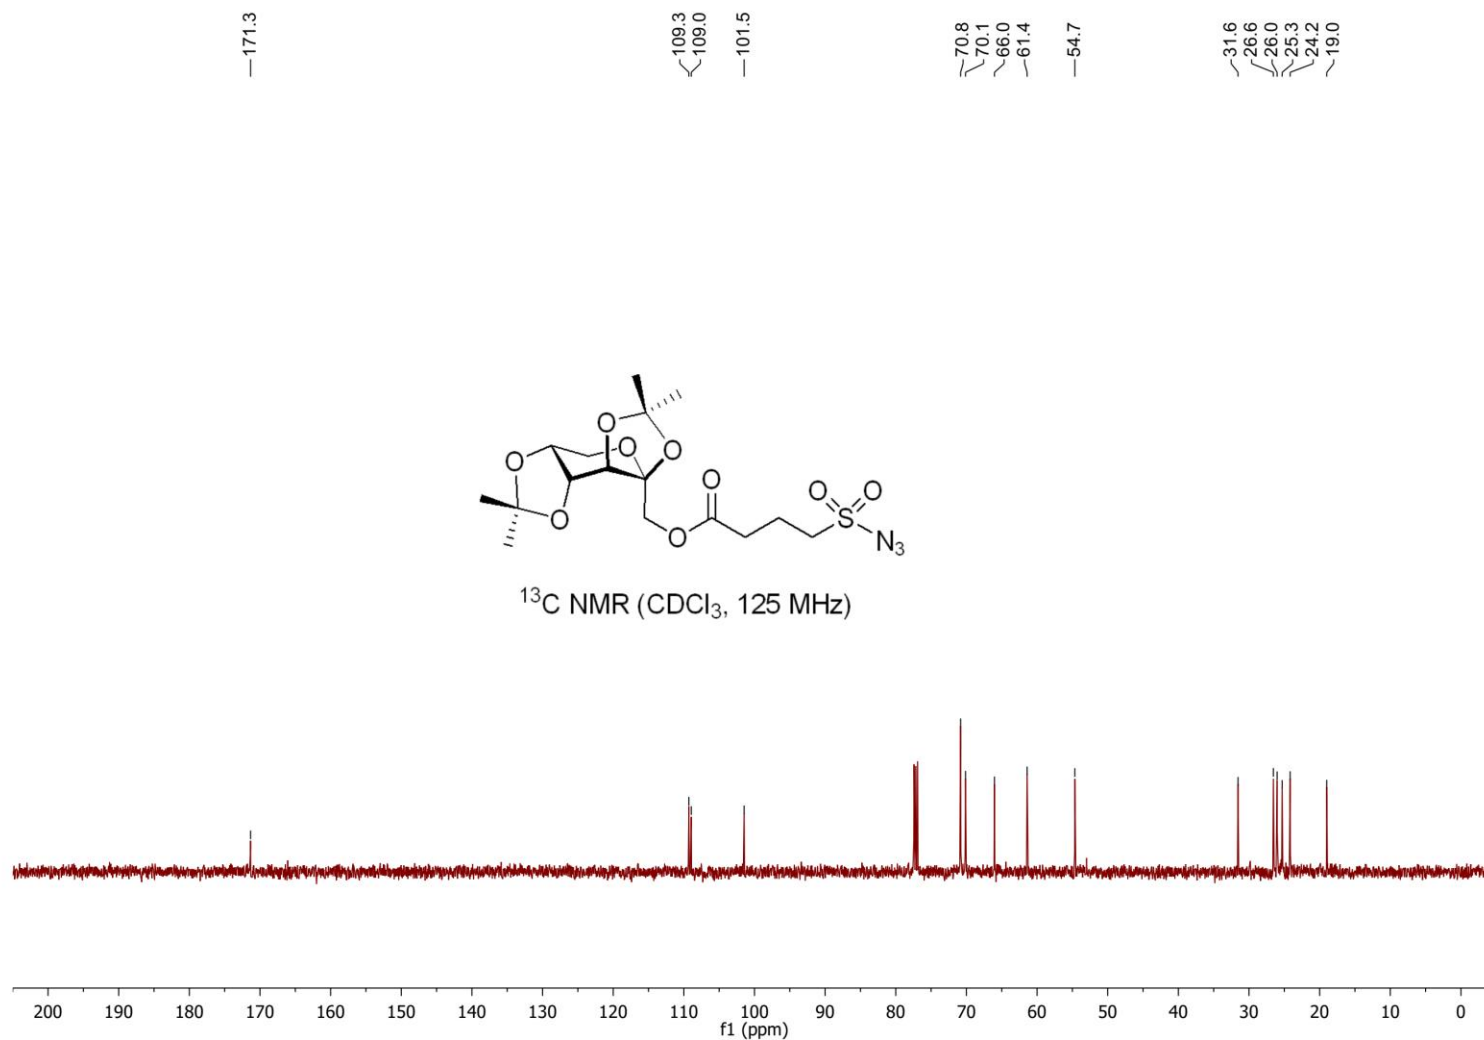

**(1S,2S,4aR,4bR,7S,9aS,10S,10aR)-10-(Azidosulfonyl)-1-methyl-8-methylene-13-oxo-1,2,5,6,8,9,10,10a-octahydro-4a,1-(epoxymethano)-7,9a-methanobenzo[a]azulene-2,7(4bH)-diyl diacetate (10g)**

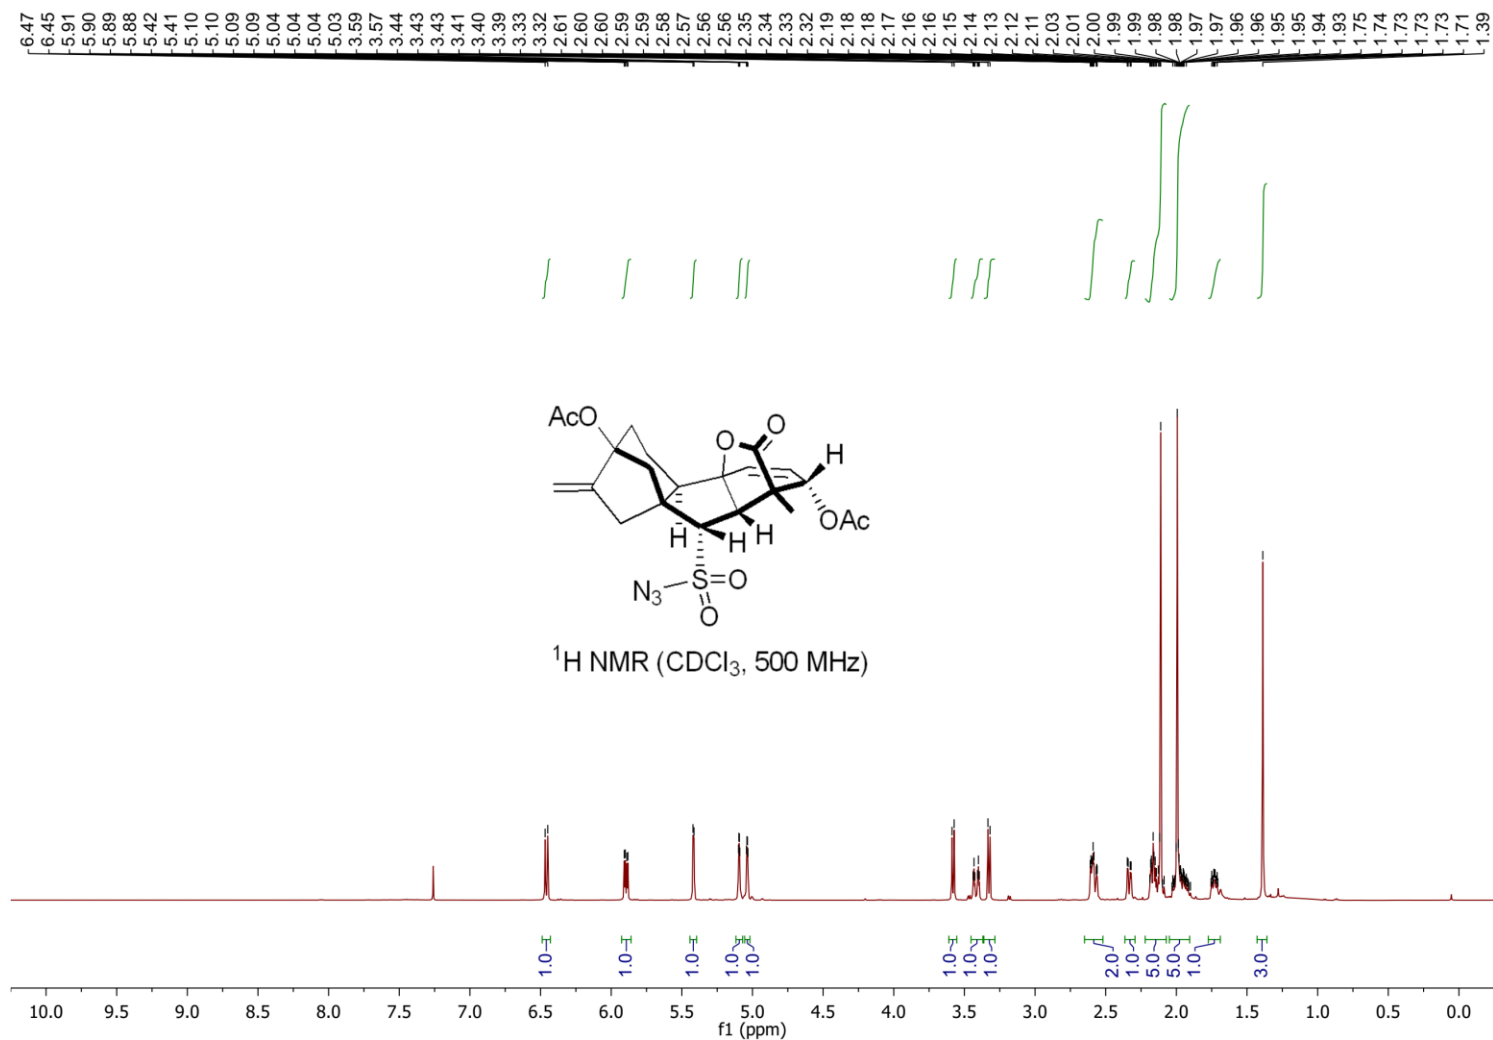

S359

[Go back to table of contents](#)

**(1*S*,2*S*,4*aR*,4*bR*,7*S*,9*aS*,10*S*,10*aR*)-10-(Azidosulfonyl)-1-methyl-8-methylene-13-oxo-1,2,5,6,8,9,10,10*a*-octahydro-4*a*,1-(epoxymethano)-7,9*a*-methanobenzo[*a*]azulene-2,7(4*bH*)-diyl diacetate (10g)**

— 175.9  
— 169.8  
— 169.5  
  
— 148.7  
  
— 133.6  
— 129.7  
  
— 107.2  
  
— 89.8  
— 83.7  
  
— 71.5  
— 69.8  
  
— 54.8  
— 52.6  
— 51.9  
— 47.4  
— 44.8  
— 41.4  
— 36.0  
  
— 22.1  
— 20.8  
— 17.8  
— 14.9

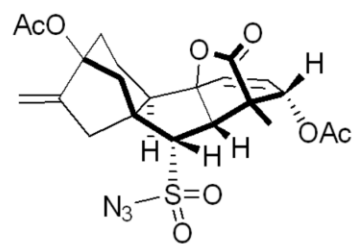

<sup>13</sup>C NMR (CDCl<sub>3</sub>, 125 MHz)

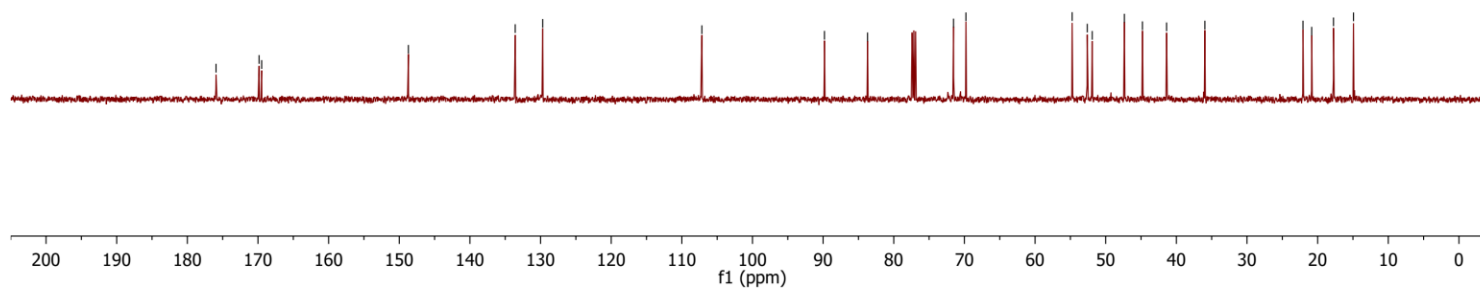



# **((1*S*,3*R*)-3-Acetyl-2,2-dimethylcyclobutyl)methanesulfonyl azide (10h)**

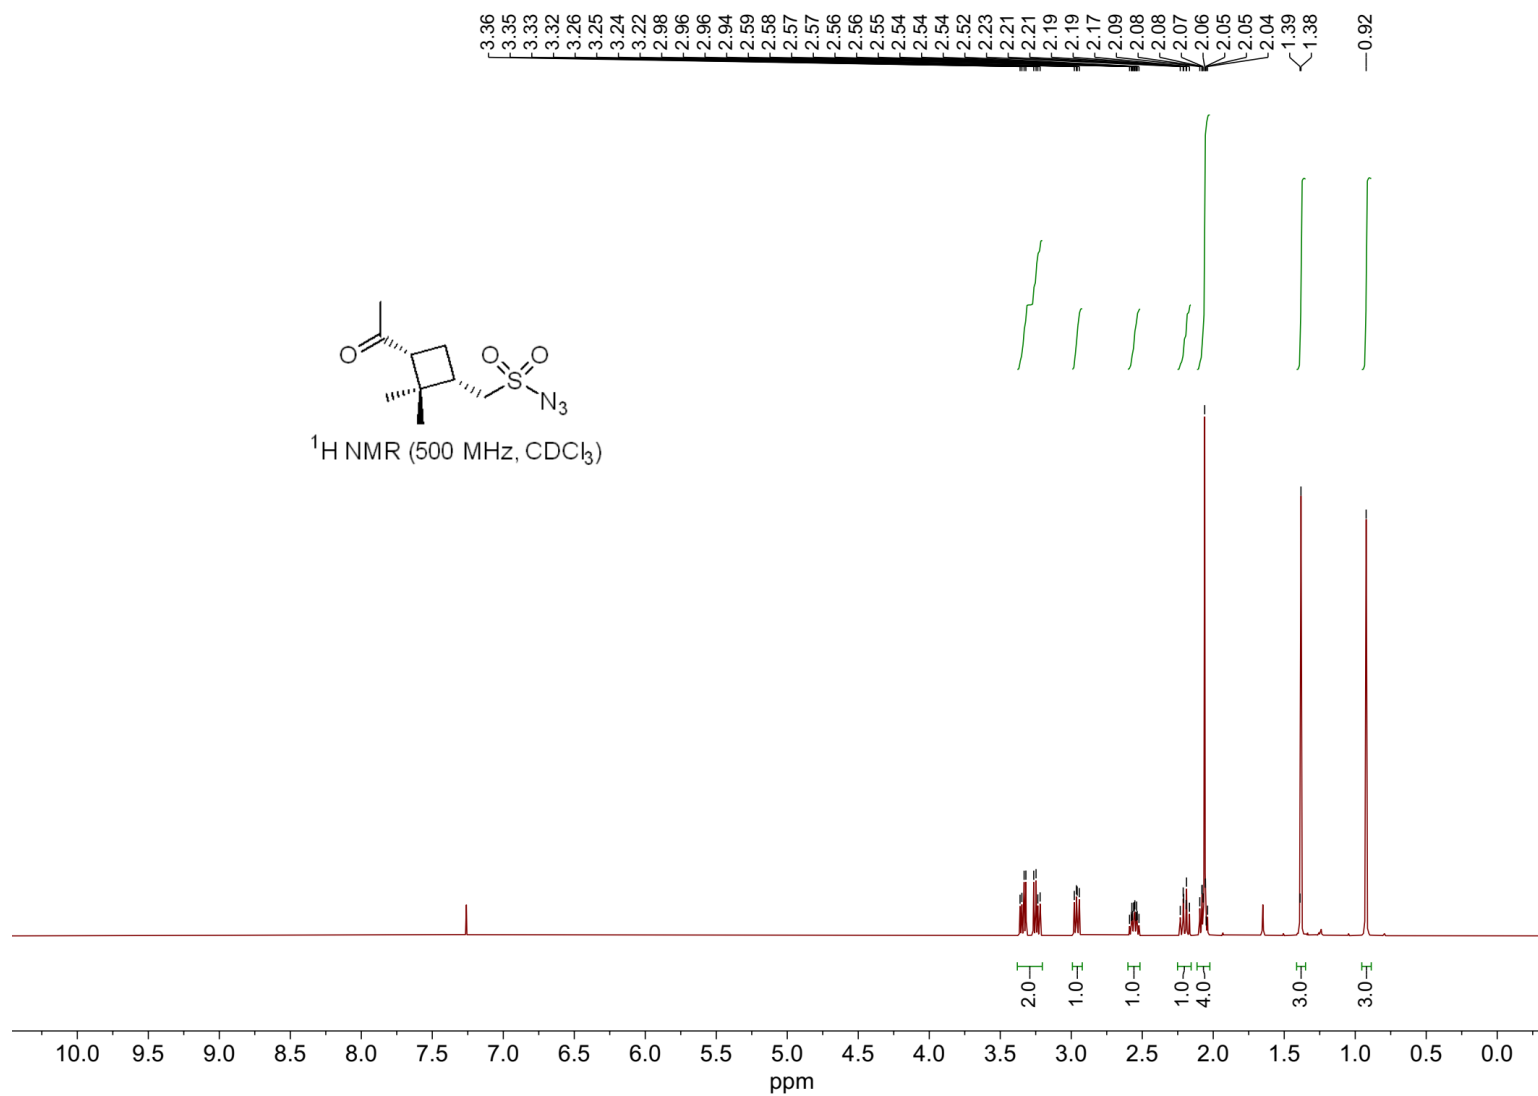

# **((1*S*,3*R*)-3-Acetyl-2,2-dimethylcyclobutyl)methanesulfonyl azide (10h)**

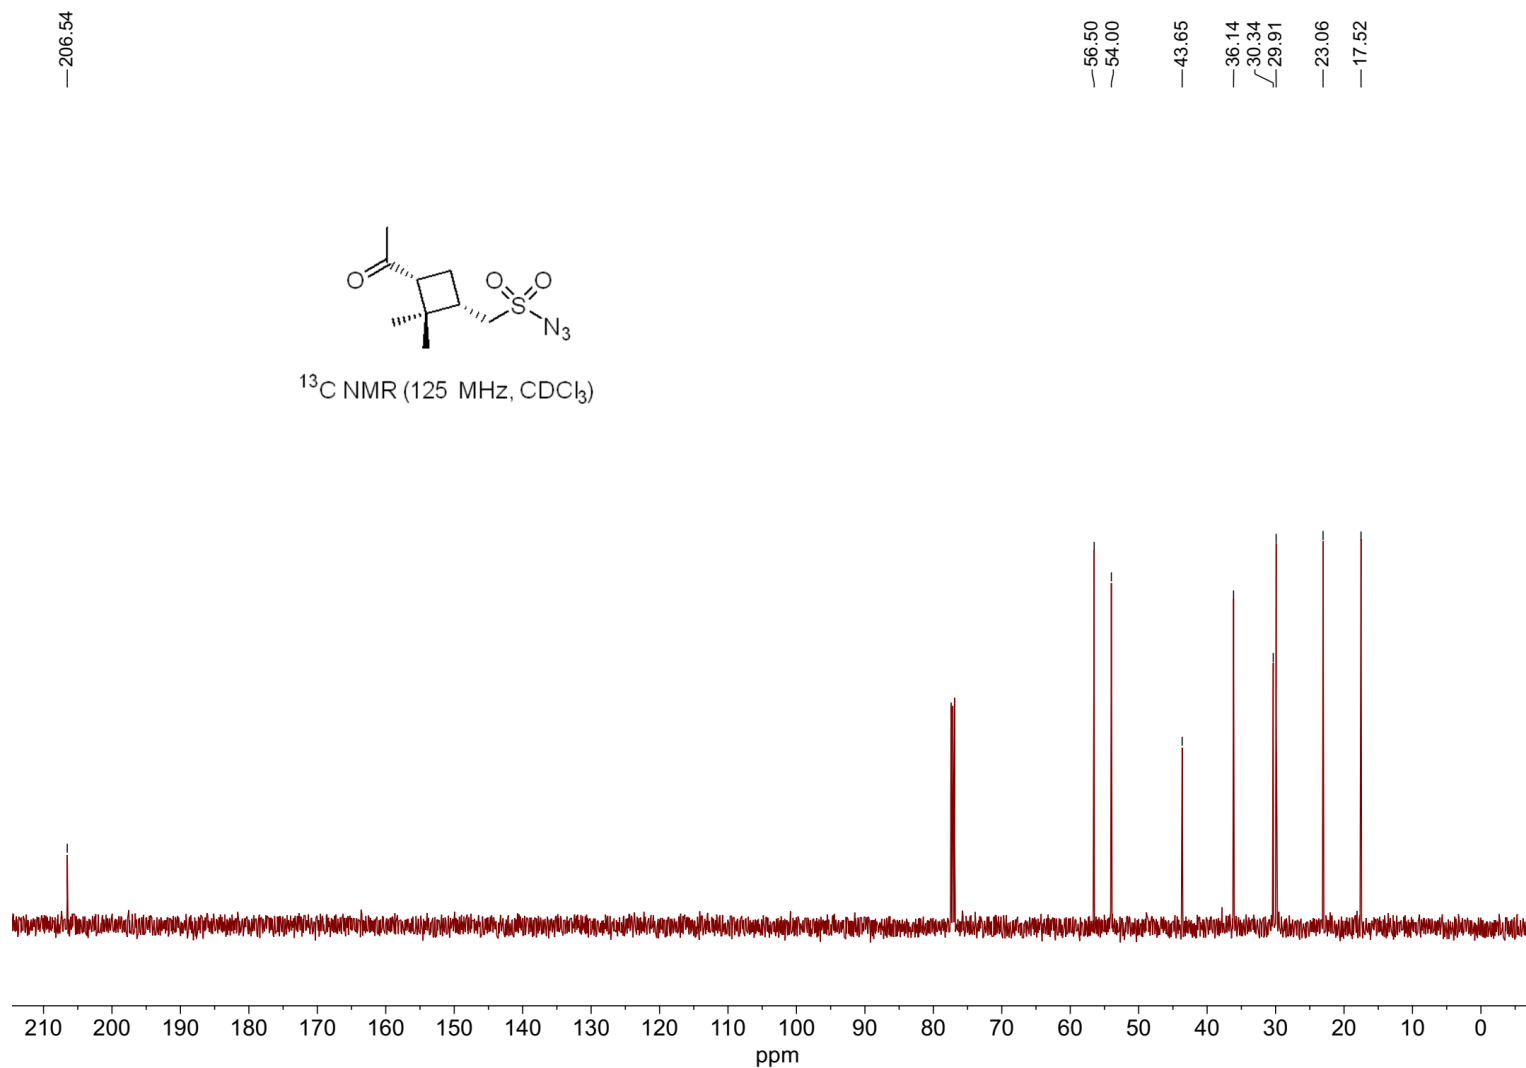

**(3*R*,7*R*,8*R*,9*S*,10*S*,12*S*,13*R*,14*S*,17*R*)-17-((*R*)-4-(Azidosulfonyl)butan-2-yl)-10,13-dimethylhexadecahydro-1*H*-cyclopenta[*a*]phenanthrene-3,7,12-triyl triacetate (10i)**

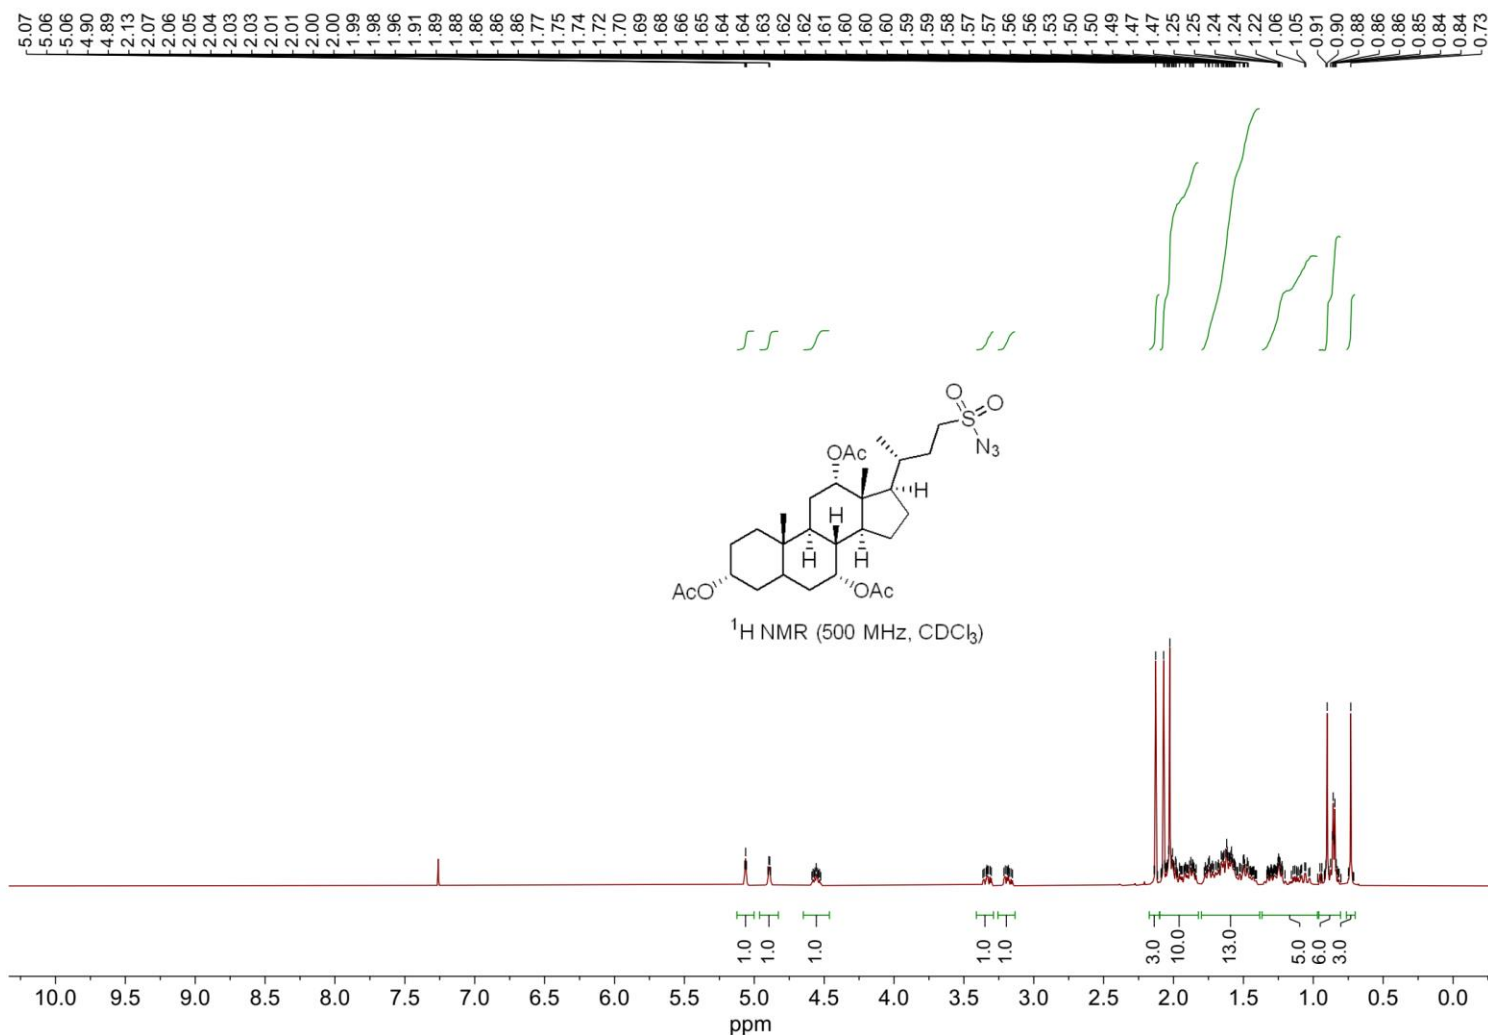



**(3*R*,7*R*,8*R*,9*S*,10*S*,12*S*,13*R*,14*S*,17*R*)-17-((*R*)-4-(Azidosulfonyl)butan-2-yl)-10,13-dimethylhexadecahydro-1*H*-cyclopenta[*a*]phenanthrene-3,7,12-triyl triacetate (10i)**

170.6  
170.5  
170.4

75.3  
74.1  
70.7

53.6

47.3

45.3

43.5

41.0

37.9

34.8

34.7

34.4

34.2

29.2

29.0

27.0

25.7

22.6

21.7

21.6

21.6

17.7

12.4

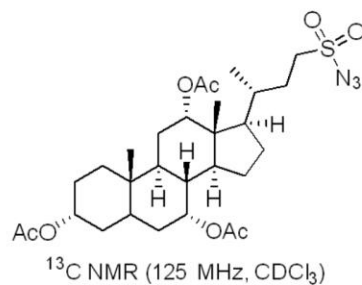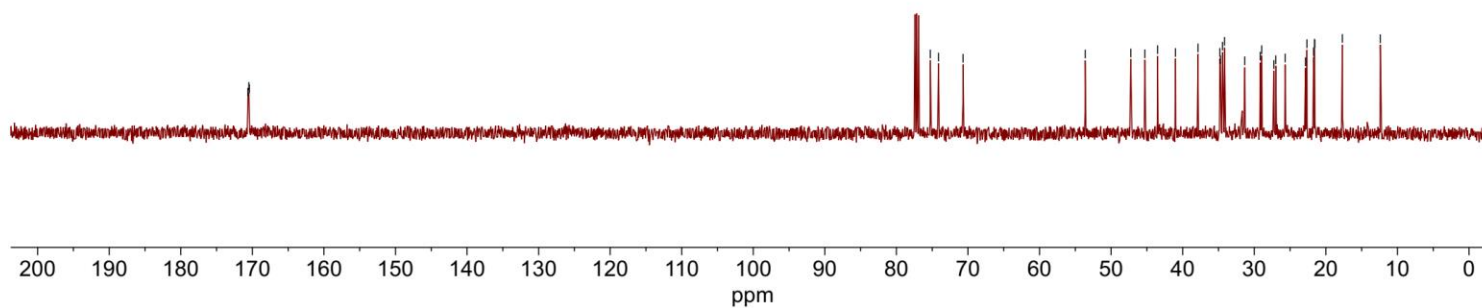

# 15-(Azidosulfonyl)pentadecane-1,7,8-triyl triacetate (10j)

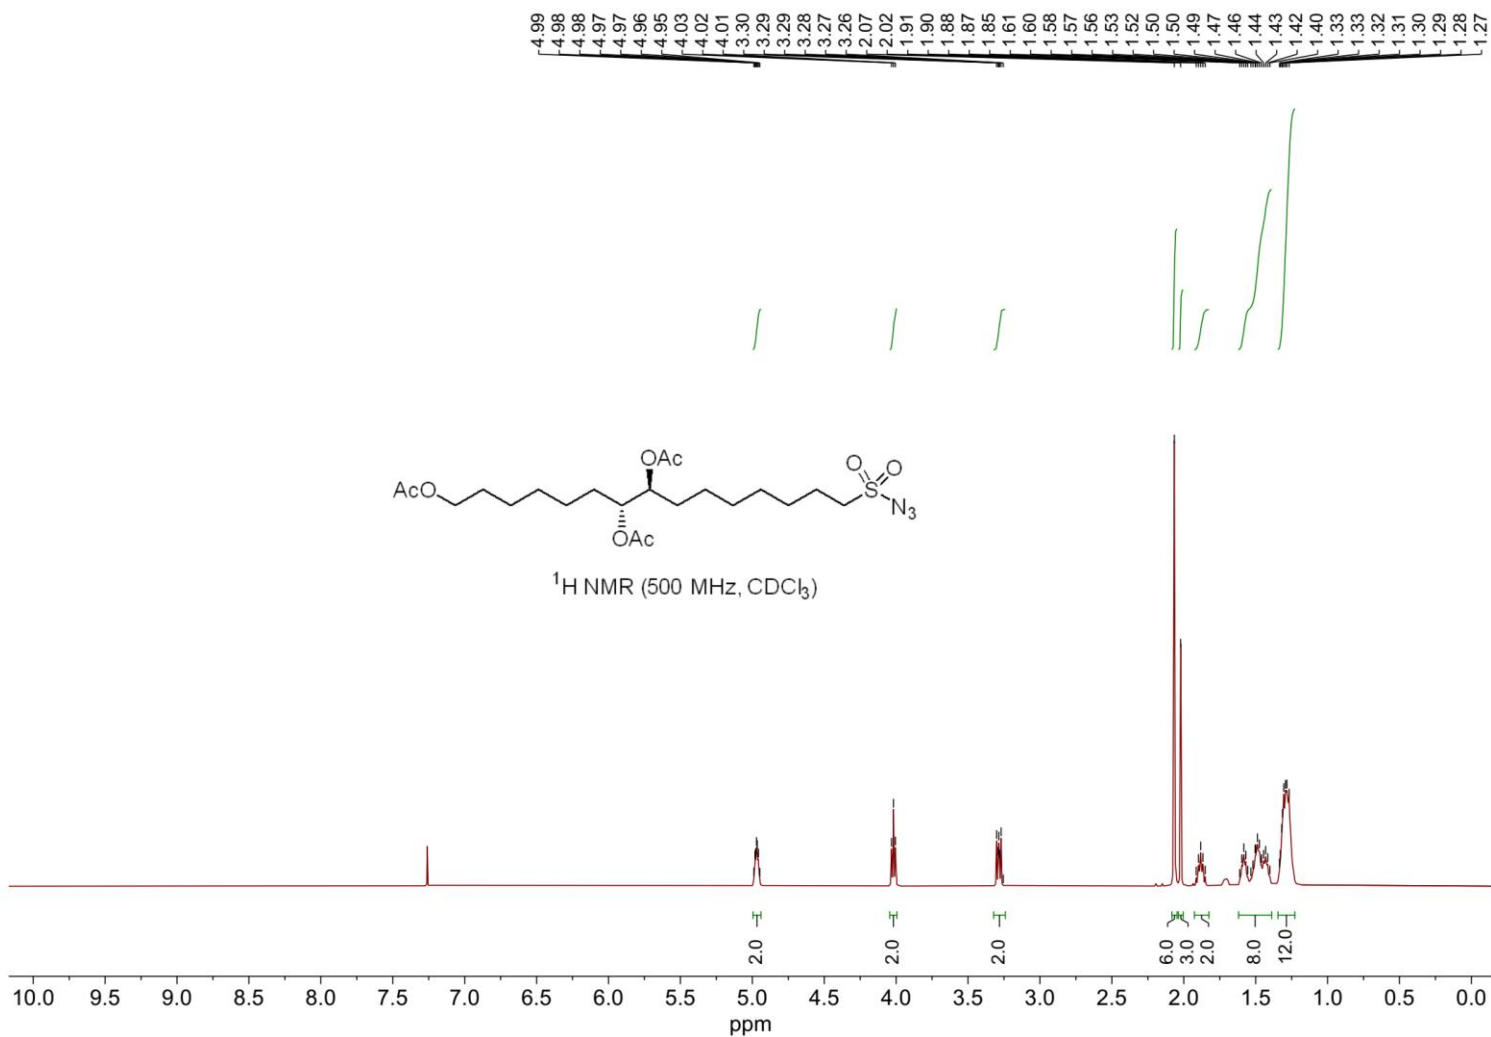

# 15-(Azidosulfonyl)pentadecane-1,7,8-triyl triacetate (10j)

171.3  
170.7  
73.8  
64.5  
56.0  
30.8  
30.8  
29.1  
29.0  
28.8  
28.6  
27.9  
25.8  
25.2  
25.1  
23.4  
21.1  
21.0

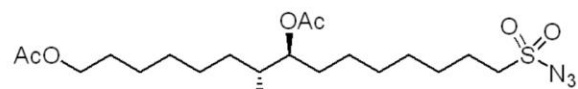

<sup>13</sup>C NMR (125 MHz, CDCl<sub>3</sub>)

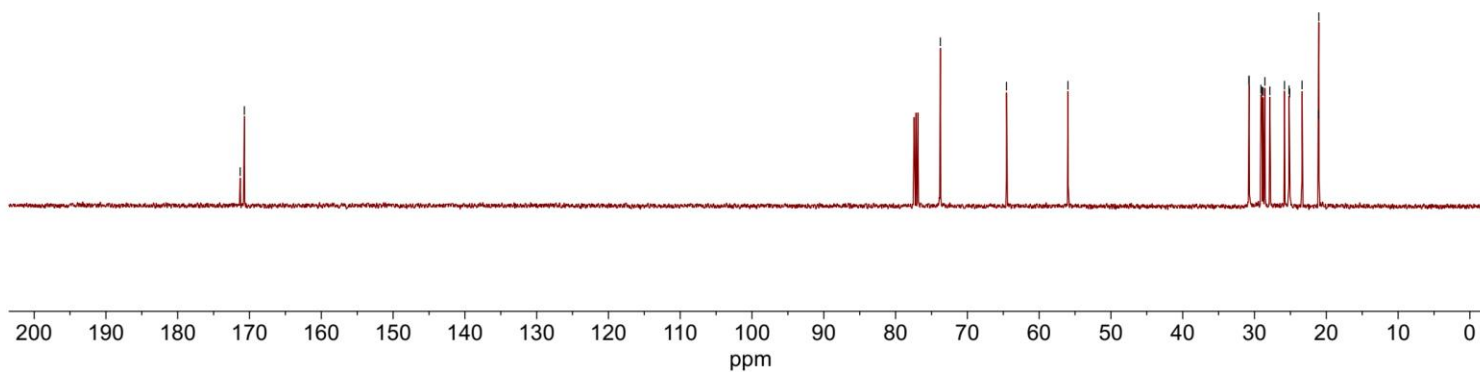

## References

- 1 V. T. Nguyen, V. D. Nguyen, G. C. Haug, H. T. Dang, S. Jin, Z. Li, C. Flores-Hansen, B. S. Benavides, H. D. Arman, O. V. Larionov, *ACS Catal.*, 2019, **9**, 9485–9498.
- 2 S. Van Mileghem, W. M. De Borggraeve, *Org. Process Res. Dev.*, 2017, **21**, 785–787.
- 3 E. Brehm, R. Breinbauer, *Org. Biomol. Chem.*, 2013, **11**, 4750–4756.
- 4 H. Zhao, X. Guo, H. Tian, C. Li, Z. Xie, Y. Geng, F. Wang, *J. Mater. Chem.*, 2010, **20**, 3092–3097.
- 5 G. B. V. Subramanian, R. Sharma, *Synth. Commun.*, 1989, **19**, 1197–1202.
- 6 E. C. Liu, J. J. Topczewski, *J. Am. Chem. Soc.*, 2019, **141**, 5135–5138.
- 7 R. Thakare, H. Gao, R. E. Kosa, Y. A. Bi, M. V. Varma, M. A. Cerny, R. Sharma, M. Kuhn, B. Huang, Y. Liu, A. Yu, *Drug Metab. Dispos.*, 2017, **45**, 721–733.
- 8 H. T. Dang, G. C. Haug, V. T. Nguyen, N. T. H. Vuong, V. D. Nguyen, H. Arman, O. V. Larionov, *ACS Catalysis*, 2020, **10**, 11448–11457.
- 9 E. M. Espinoza, J. A. Clark, J. Soliman, J. B. Derr, M. Morales, V. I. Vullev, *J. Electrochem. Soc.*, 2019, **116**, H3175–H3187.
- 10 Gaussian 16, Revision B.01, M. J. Frisch, G. W. Trucks, H. B. Schlegel, G. E. Scuseria, M. A. Robb, J. R. Cheeseman, G. Scalmani, V. Barone, G. A. Petersson, H. Nakatsuji, X. Li, M. Caricato, A. V. Marenich, J. Bloino, B. G. Janesko, R. Gomperts, B. Mennucci, H. P. Hratchian, J. V. Ortiz, A. F. Izmaylov, J. L. Sonnenberg, D. Williams-Young, F. Ding, F. Lipparini, F. Egidi, J. Goings, B. Peng, A. Petrone, T. Henderson, D. Ranasinghe, V. G. Zakrzewski, J. Gao, N. Rega, G. Zheng, W. Liang, M. Hada, M. Ehara, K. Toyota, R. Fukuda, J. Hasegawa, M. Ishida, T. Nakajima, Y. Honda, O. Kitao, H. Nakai, T. Vreven, K. Throssell, J. A. Montgomery, Jr., J. E. Peralta, F. Ogliaro, M. J. Bearpark, J. J. Heyd, E. N. Brothers, K. N. Kudin, V. N. Staroverov, T. A. Keith, R. Kobayashi, J. Normand, K. Raghavachari, A. P. Rendell, J. C. Burant, S. S. Iyengar, J.

- Tomasi, M. Cossi, J. M. Millam, M. Klene, C. Adamo, R. Cammi, J. W. Ochterski, R. L. Martin, K. Morokuma, O. Farkas, J. B. Foresman, D. J. Fox, Gaussian, Inc., Wallingford CT, 2016.
- 11 Texas Advanced Computing Center (TACC), The University of Texas at Austin
- 12 P. Pracht, F. Bohle, S. Grimme, *Phys. Chem. Chem. Phys.*, 2020, **22**, 7169-7192.
- 13 S. Grimme, C. Bannwarth, P. Shushkov, *J Chem. Theory Comput.*, 2017, **13**, 1989-2009.
- 14 C. Bannwarth, S. Ehlert, S. Grimme, *J. Chem. Theory Comput.*, 2019, **15**, 1652-1671.
- 15 Chemcraft - graphical software for visualization of quantum chemistry computations.  
<https://www.chemcraftprog.com>
- 16 A. Hansen, C. Bannwarth, S. Grimme, P. Petrović, C. Werlé, J.-P. Djukic, *ChemistryOpen*, 2014, **3**, 177–189.
- 17 a) G. Luchini, J. V. Alegre-Requena, Y. Guan, I. Funes-Ardoiz, R. S. Paton, GoodVibes: GoodVibes v3.0.1 (2019); b) G. Luchini, J. V. Alegre-Requena, Y. Guan, I. Funes-Ardoiz, R. S. Paton, *F1000Research*, 2020, **9**, 291.
- 18 CYLview, 1.0b; C. Y. Legault, Université de Sherbrooke, 2009 (<http://www.cylview.org>).
- 19 W. Humphrey, A. Dalke, K. Schulten, *J. Molec. Graphics*, 1996, **14**, 33–38.
- 20 S. Grimme, J. Antony, S. Ehrlich, H. Krieg, *J. Chem. Phys.*, 2010, **132**, 154104.
- 21 S. Grimme, S. Ehrlich, L. Goerigk, *J. Comput. Chem.*, 2011, **32**, 1456–1465.
- 22 Y. Zhao, D. G. Truhlar, *J. Phys. Chem. A*, 2005, **109**, 5656–5667.
- 23 L. Goerigk, A. Hansen, C. Bauer, S. Ehrlich, A. Najibi, S. Grimme, *Phys. Chem. Chem. Phys.*, 2017, **19**, 32184.
- 24 F. Weigend, R. Ahlrichs, *Phys. Chem. Chem. Phys.*, 2005, **7**, 3297–3305.
- 25 A. V. Marenich, C. J. Cramer, D. G. Truhlar, *J. Phys. Chem. B*, 2009, **113**, 6378–6396.

- 26 B. P. Pritchard, D. Altarawy, B. Didier, T. D. Gibson, T. L. Windus, *J. Chem. Inf. Model.*, 2019, **59**, 4814–4820.
- 27 H. T. Dang, G. C. Haug, V. T. Nguyen, N. T. H. Vuong, V. D. Nguyen, H. D. Arman, O. V. Larionov, *ACS Catal.*, 2020, **10**, 11448–11457.
- 28 A. Weller, *Electrochem.*, 1952, **56**, 662–668.
- 29 M. Lõkov, S. Tshepelevitsh, A. Heering, P. G. Plieger, R. Vianello, I. Leito, *Eur. J. Org. Chem.*, 2017, **2017**, 4475–4489.
